# Supplementary material for: The variability of expression of many genes and most functional pathways is observed to increase with age in brain transcriptome data
Source: bioRxiv preprint, doi:10.1101/526491, version 1 (2019-01-22)
Supplement: Supplemental Table 1 [file 526491_file03.xlsx]

## Sheet: regression
Entrez_Gene_ID	Gene_Symbol	beta1	p.value_beta1	p.value_beta1_fdr_adjusted
10678	B3GNT2	-0.56674	5.19887e-13	8.66911e-09
162494	RHBDL3	1.01131	1.232e-12	1.02718e-08
2289	FKBP5	1.04609	1.35485e-11	7.53072e-08
2849	GPR26	-0.977771	1.8245e-11	7.60587e-08
84894	LINGO1	-0.706328	3.6703e-11	1.22405e-07
59352	LGR6	-0.880143	1.78899e-10	4.26799e-07
4023	LPL	1.05738	1.79166e-10	4.26799e-07
22999	RIMS1	-0.453741	3.16541e-10	5.99425e-07
8153	RND2	0.509706	3.23528e-10	5.99425e-07
339479	FAM5C	-0.593899	8.20308e-10	1.29661e-06
9315	C5orf13	-0.625608	8.55335e-10	1.29661e-06
51324	SPG21	0.405621	1.13694e-09	1.57987e-06
150	ADRA2A	-0.703207	1.72203e-09	2.05106e-06
4968	OGG1	-0.363861	1.67073e-09	2.05106e-06
652	BMP4	0.673418	2.48086e-09	2.58552e-06
4878	NPPA	-1.20161	2.44925e-09	2.58552e-06
51760	SYT17	-0.580249	2.754e-09	2.70135e-06
80818	ZNF436	-0.522632	3.16378e-09	2.9309e-06
10633	RASL10A	-0.551904	4.75896e-09	4.17661e-06
25966	C2CD2	0.530731	5.39145e-09	4.32369e-06
25822	DNAJB5	-0.596588	5.44513e-09	4.32369e-06
349136	WDR86	-0.900034	6.99591e-09	5.30258e-06
3755	KCNG1	-0.363914	7.7771e-09	5.6384e-06
5368	PNOC	-0.915902	8.53228e-09	5.92816e-06
57495	KIAA1239	-0.921489	1.06746e-08	7.11999e-06
9890	LPPR4	-0.77691	1.26462e-08	8.11056e-06
2118	ETV4	-0.922176	1.36272e-08	8.41607e-06
283588	LOC283588	0.770701	1.58029e-08	9.41117e-06
6376	CX3CL1	-0.647506	2.47789e-08	1.40876e-05
307	ANXA4	0.62502	2.53451e-08	1.40876e-05
25907	TMEM158	-0.62433	2.80066e-08	1.50648e-05
79683	ZDHHC14	-0.301077	4.55439e-08	2.37327e-05
135398	C6orf141	-0.878654	4.79173e-08	2.42128e-05
793	CALB1	-1.30843	5.71802e-08	2.80435e-05
257415	FAM133B	0.304115	6.43329e-08	3.065e-05
83445	GSG1	-0.476851	7.22015e-08	3.34434e-05
203286	ANKS6	0.402312	7.59391e-08	3.42239e-05
10541	ANP32B	0.673019	8.69602e-08	3.81595e-05
56934	CA10	-0.602881	9.54113e-08	3.97746e-05
57419	SLC24A3	-0.410673	9.48948e-08	3.97746e-05
100526835	FPGT-TNNI3K	-0.63838	1.14318e-07	4.5387e-05
116328	C8orf34	-0.695601	1.1359e-07	4.5387e-05
9362	CPNE6	-0.57286	1.45914e-07	5.6584e-05
10090	UST	-0.4284	1.51576e-07	5.74437e-05
196383	RILPL2	-0.457278	1.78746e-07	6.62351e-05
4794	NFKBIE	-0.249437	2.35422e-07	8.53405e-05
10777	ARPP21	-0.34672	3.54515e-07	0.000125777
8912	CACNA1H	-0.371888	3.73237e-07	0.000129661
23531	MMD	-0.596127	4.11011e-07	0.000133843
6751	SSTR1	-0.824435	3.95293e-07	0.000133843
84259	DCUN1D5	-0.490627	4.25409e-07	0.000133843
146395	GSG1L	-0.554812	4.02783e-07	0.000133843
58	ACTA1	-0.315861	4.23525e-07	0.000133843
116443	GRIN3A	-0.672658	4.57665e-07	0.000140842
57574	2019-03-04	-0.67464	4.64547e-07	0.000140842
56138	PCDHA11	-0.351573	5.01905e-07	0.000149451
728485	LOC728485	-0.569193	5.58904e-07	0.000163504
170463	SSBP4	-0.403334	6.14531e-07	0.000176678
3299	HSF4	0.474687	6.25803e-07	0.000176869
23046	KIF21B	-0.496265	6.61503e-07	0.000183843
5744	PTHLH	-0.602652	7.53868e-07	0.000206078
157285	SGK223	-0.469596	8.12151e-07	0.000218429
203522	DDX26B	0.380687	8.88156e-07	0.000235079
4330	MN1	-0.651803	9.25416e-07	0.000241114
6866	TAC3	-0.769209	9.4928e-07	0.000243527
6744	SSFA2	0.578694	1.02177e-06	0.000258152
6543	SLC8A2	-0.486224	1.03759e-06	0.000258237
6098	ROS1	0.950836	1.1118e-06	0.000269226
85443	DCLK3	-0.440657	1.11404e-06	0.000269226
8537	BCAS1	0.882167	1.16004e-06	0.000276337
115827	RAB3C	-0.643994	1.24132e-06	0.000291158
51754	TMEM8B	-0.290869	1.25717e-06	0.000291158
1392	CRH	-1.12048	1.34631e-06	0.00030753
80309	SPHKAP	-0.34716	1.37454e-06	0.000309736
80010	RMI1	0.368739	1.47998e-06	0.000329049
59345	GNB4	-0.422089	1.52247e-06	0.000334042
151507	MSL3P1	-0.388355	1.69392e-06	0.000366833
9456	HOMER1	-0.65949	1.78975e-06	0.000370044
5156	PDGFRA	-0.637666	1.80266e-06	0.000370044
23344	ESYT1	0.502371	1.81971e-06	0.000370044
146177	VWA3A	0.407961	1.78548e-06	0.000370044
5179	PENK	-1.03328	1.77696e-06	0.000370044
23769	FLRT1	-0.427994	1.89074e-06	0.000379609
2742	GLRA2	-0.686785	1.91227e-06	0.000379609
221421	RSPH9	-0.456535	2.02326e-06	0.000393301
51667	NUB1	0.350699	2.02842e-06	0.000393301
55800	SCN3B	-0.568769	2.29475e-06	0.000439827
11072	DUSP14	-0.429969	2.39793e-06	0.00045438
90673	PPP1R3E	0.298246	2.47079e-06	0.000459264
57144	PAK7	-0.540696	2.50633e-06	0.000459264
160622	GRASP	-0.484744	2.49264e-06	0.000459264
25886	POC1A	-0.28009	2.55353e-06	0.000462826
399979	SNX19	0.354171	2.63335e-06	0.000472163
23175	LPIN1	0.403128	2.68077e-06	0.000475552
9252	RPS6KA5	0.337657	2.83255e-06	0.000497187
3706	ITPKA	-0.504048	3.14786e-06	0.000546778
3787	KCNS1	0.702743	3.30701e-06	0.000568499
10732	TCFL5	0.51538	3.44223e-06	0.000585707
84261	FBXW9	-0.377378	3.501e-06	0.000589689
56254	RNF20	0.288339	3.61116e-06	0.000590245
5475	PPEF1	-0.776558	3.58984e-06	0.000590245
4306	NR3C2	0.417935	3.64589e-06	0.000590245
5834	PYGB	0.428663	3.54386e-06	0.000590245
1592	CYP26A1	-0.340871	3.89013e-06	0.00062373
784	CACNB3	-0.426203	3.96036e-06	0.000628943
91624	NEXN	0.607871	4.2213e-06	0.000664058
23433	RHOQ	0.312981	4.36156e-06	0.00067971
55140	ELP3	0.292831	4.61358e-06	0.000712329
219681	ARMC3	0.791476	5.65814e-06	0.000865592
7280	TUBB2A	-0.196497	5.88808e-06	0.000892579
3777	KCNK3	-0.306162	6.15381e-06	0.000924458
8165	AKAP1	0.296491	6.26443e-06	0.000932673
376267	RAB15	-0.384809	6.38304e-06	0.000941922
23467	NPTXR	-0.466505	6.64284e-06	0.000966988
57180	ACTR3B	-0.578891	6.66888e-06	0.000966988
2670	GFAP	0.75425	7.09159e-06	0.00101942
56917	MEIS3	-0.237739	7.16353e-06	0.00102096
51514	DTL	-0.355458	7.24098e-06	0.00102325
117248	GALNTL2	0.790274	7.45509e-06	0.00104291
221477	C6orf89	0.334743	7.50521e-06	0.00104291
23593	HEBP2	0.554862	7.89873e-06	0.00108852
7508	XPC	0.369983	8.37805e-06	0.00114511
27445	PCLO	-0.485408	8.95948e-06	0.0011952
51517	NCKIPSD	0.428013	8.93312e-06	0.0011952
4122	MAN2A2	0.393409	8.93028e-06	0.0011952
11343	MGLL	-0.394516	9.04367e-06	0.00119685
84063	KIRREL2	-0.211989	9.28521e-06	0.00121334
5288	PIK3C2G	-0.589189	9.31379e-06	0.00121334
54899	PXK	0.649245	9.64432e-06	0.00123707
4299	AFF1	0.347925	9.5717e-06	0.00123707
55230	USP40	0.458504	1.00031e-05	0.00125738
1400	CRMP1	-0.451501	9.93061e-06	0.00125738
64333	ARHGAP9	0.475087	1.00289e-05	0.00125738
23612	PHLDA3	0.354583	1.01339e-05	0.00126106
8573	CASK	-0.193049	1.05854e-05	0.00127907
3097	HIVEP2	-0.496153	1.04133e-05	0.00127907
121256	TMEM132D	-0.552385	1.05833e-05	0.00127907
6843	VAMP1	0.416106	1.05354e-05	0.00127907
84937	ZNRF1	-0.278973	1.11467e-05	0.0013372
2199	FBLN2	-0.420131	1.15007e-05	0.0013601
1027	CDKN1B	0.306578	1.14281e-05	0.0013601
7037	TFRC	-0.552746	1.174e-05	0.00137862
163404	LPPR5	-0.373461	1.2515e-05	0.00145935
151176	FAM132B	-0.290652	1.3253e-05	0.00153468
6272	SORT1	0.497429	1.35017e-05	0.00155269
387103	CENPW	-0.54241	1.45397e-05	0.00166061
27309	ZNF330	0.281238	1.47862e-05	0.00167727
22794	CASC3	0.314909	1.51439e-05	0.00169728
60626	RIC8A	-0.225714	1.51661e-05	0.00169728
55634	ZNF673	0.309504	1.65847e-05	0.00183647
83450	LRRC48	0.405736	1.66301e-05	0.00183647
114780	PKD1L2	1.00055	1.68304e-05	0.00184636
2897	GRIK1	-0.539689	1.71856e-05	0.00187011
10125	RASGRP1	-0.566609	1.72712e-05	0.00187011
57569	ARHGAP20	-0.666443	1.76146e-05	0.00188284
3295	HSD17B4	0.367232	1.75971e-05	0.00188284
57722	IGDCC4	0.714222	1.8286e-05	0.00193319
220164	DOK6	-0.609562	1.83175e-05	0.00193319
114801	TMEM200A	-0.691507	1.85878e-05	0.00194938
6196	RPS6KA2	0.284407	1.94463e-05	0.00201408
10491	CRTAP	0.23011	1.9351e-05	0.00201408
10874	NMU	-0.92415	2.00207e-05	0.00206077
50807	ASAP1	-0.277524	2.17119e-05	0.00222115
27235	COQ2	-0.298011	2.22218e-05	0.00224619
152926	PPM1K	0.341838	2.22262e-05	0.00224619
80757	TMEM121	-0.325127	2.24854e-05	0.0022587
358	AQP1	0.781274	2.27895e-05	0.002262
1009	CDH11	-0.362171	2.27875e-05	0.002262
7371	UCK2	-0.264205	2.41913e-05	0.00238692
400961	PAIP2B	0.679292	2.46472e-05	0.0024176
79073	TMEM109	0.28299	2.5585e-05	0.00246607
57222	ERGIC1	-0.321838	2.53028e-05	0.00246607
814	CAMK4	-0.799376	2.55109e-05	0.00246607
4751	NEK2	-0.441337	2.64573e-05	0.00253549
6773	STAT2	0.344719	2.70448e-05	0.00257698
6422	SFRP1	0.66567	2.74243e-05	0.00259613
54221	SNTG2	0.679324	2.75572e-05	0.00259613
23423	TMED3	-0.302724	2.83468e-05	0.00265552
3067	HDC	-0.489606	3.09236e-05	0.00286473
10683	DLL3	-0.307793	3.08031e-05	0.00286473
4134	MAP4	0.288216	3.16597e-05	0.00291672
6002	RGS12	-0.238469	3.24346e-05	0.00297169
28996	HIPK2	0.612773	3.34986e-05	0.0030524
284348	LYPD5	0.484844	3.37467e-05	0.0030583
1001	CDH3	-0.364911	3.49946e-05	0.00312764
5204	PFDN5	0.209396	3.50746e-05	0.00312764
26092	TOR1AIP1	0.308278	3.50337e-05	0.00312764
131408	FAM131A	-0.381869	3.54297e-05	0.0031425
10439	OLFM1	-0.350815	3.656e-05	0.00322099
5580	PRKCD	-0.502394	3.67009e-05	0.00322099
25777	SUN2	0.563297	3.74144e-05	0.00326642
8128	ST8SIA2	-0.336274	3.83577e-05	0.00333133
125	ADH1B	0.795727	3.94505e-05	0.00340848
80262	C16orf70	0.339009	4.05566e-05	0.00346811
6277	S100A6	0.39798	4.04671e-05	0.00346811
51575	ESF1	0.279862	4.25085e-05	0.00361648
57464	FAM40B	-0.318993	4.3357e-05	0.00366994
4162	MCAM	0.478242	4.37499e-05	0.00368449
11279	KLF8	-0.34257	4.44387e-05	0.0037237
284023	LOC284023	0.368935	4.47496e-05	0.003731
9249	DHRS3	0.510875	4.64373e-05	0.00384615
80758	PRR7	-0.348351	4.65921e-05	0.00384615
24139	EML2	0.31837	4.71343e-05	0.00387175
1356	CP	1.39285	4.82774e-05	0.00390789
9866	TRIM66	0.303611	4.79591e-05	0.00390789
26517	TIMM13	-0.318458	4.81457e-05	0.00390789
79158	GNPTAB	-0.327774	4.87288e-05	0.00392537
2996	GYPE	-0.331245	4.93434e-05	0.00395577
7158	TP53BP1	-0.342167	4.96568e-05	0.00396185
148423	C1orf52	-0.354614	5.03488e-05	0.00399794
26127	FGFR1OP2	0.284549	5.06346e-05	0.00400157
3075	CFH	0.538909	5.13882e-05	0.00404197
150568	LOC150568	-0.559444	5.16633e-05	0.00404453
81572	PDRG1	-0.262179	5.23823e-05	0.00408166
5983	RFC3	-0.410819	5.32748e-05	0.00413189
284835	LINC00323	-0.499829	5.35937e-05	0.00413738
84986	ARHGAP19	0.373614	5.47575e-05	0.00420775
27439	CECR6	-0.428191	5.56478e-05	0.00421297
4664	NAB1	0.298228	5.53959e-05	0.00421297
4673	NAP1L1	0.307461	5.52245e-05	0.00421297
163175	LGI4	0.437555	5.58361e-05	0.00421297
5593	PRKG2	-0.62643	5.65384e-05	0.00424675
64506	CPEB1	0.384368	5.69759e-05	0.00426042
2290	FOXG1	-0.237307	5.88026e-05	0.00437738
22884	WDR37	0.332626	6.13789e-05	0.00448901
55022	PID1	-0.396335	6.07643e-05	0.00448901
100505906	LOC100505906	-0.299223	6.12575e-05	0.00448901
55816	DOK5	-0.406485	6.12793e-05	0.00448901
60680	CELF5	-0.285541	6.18896e-05	0.00450659
2042	EPHA3	-0.201022	6.21808e-05	0.00450811
550643	LOC550643	-0.30128	6.32705e-05	0.00456726
253558	LCLAT1	-0.260532	6.37258e-05	0.00456868
9427	ECEL1	-0.413243	6.38382e-05	0.00456868
57799	RAB40C	-0.342304	6.60159e-05	0.00462578
54930	HAUS4	0.308365	6.55452e-05	0.00462578
221938	MMD2	-0.37044	6.55672e-05	0.00462578
8607	RUVBL1	-0.246198	6.63005e-05	0.00462578
84181	CHD6	0.312708	6.61681e-05	0.00462578
100526694	C9orf30-TMEFF1	-0.326105	6.54195e-05	0.00462578
6578	SLCO2A1	-0.526482	6.75352e-05	0.00467282
57633	LRRN1	-0.372264	6.75262e-05	0.00467282
89795	NAV3	-0.286731	6.78442e-05	0.0046748
55084	SOBP	-0.412563	6.993e-05	0.00477903
1875	E2F5	-0.326596	6.98789e-05	0.00477903
6804	STX1A	-0.313777	7.05746e-05	0.00480339
55450	CAMK2N1	-0.202654	7.12875e-05	0.00481263
6715	SRD5A1	-0.41591	7.10313e-05	0.00481263
91404	SESTD1	0.415299	7.20577e-05	0.00482437
1525	CXADR	-0.455895	7.19171e-05	0.00482437
84217	ZMYND12	0.514611	7.23294e-05	0.00482437
2878	GPX3	0.374098	7.26921e-05	0.00482925
23567	ZNF346	-0.184535	7.36133e-05	0.00487104
51534	VTA1	-0.326286	7.43969e-05	0.00490343
7869	SEMA3B	0.528973	7.48176e-05	0.00491175
100532736	C1orf151-NBL1	-0.329826	7.55583e-05	0.00494092
2840	GPR17	-0.647124	7.6101e-05	0.00494432
5138	PDE2A	-0.353037	7.62033e-05	0.00494432
51207	DUSP13	-0.676535	7.65357e-05	0.00494664
23052	ENDOD1	0.40338	7.97848e-05	0.00513673
2762	GMDS	-0.312791	8.0713e-05	0.0051765
22796	COG2	0.214557	8.13581e-05	0.00519788
57467	HHATL	0.749819	8.20538e-05	0.00522232
51175	TUBE1	0.320517	8.341e-05	0.00526842
2913	GRM3	-0.373373	8.33728e-05	0.00526842
100526739	APITD1-CORT	-0.375411	8.76961e-05	0.0054769
23325	KIAA1033	0.379415	8.76342e-05	0.0054769
57412	AS3MT	0.405713	8.74465e-05	0.0054769
91373	UAP1L1	0.444091	8.96026e-05	0.00557509
257000	PLAC2	-0.513906	9.03336e-05	0.00559968
54458	PRR13	0.213418	9.15607e-05	0.00565472
1793	DOCK1	0.546183	9.21112e-05	0.00566773
8916	HERC3	0.346163	9.34801e-05	0.00573081
79078	C1orf50	-0.193331	9.57867e-05	0.00585071
166348	KBTBD12	0.331912	9.78901e-05	0.00595737
53335	BCL11A	-0.394321	9.84981e-05	0.00597257
3479	IGF1	-0.551607	0.000101524	0.00613377
3598	IL13RA2	-0.738098	0.000103809	0.00624915
57104	PNPLA2	0.397537	0.000106357	0.0063795
8900	CCNA1	-0.470964	0.00010792	0.00638655
11021	RAB35	-0.179578	0.000107118	0.00638655
9547	CXCL14	-0.530551	0.000107708	0.00638655
8658	TNKS	0.274949	0.000108006	0.00638655
79745	CLIP4	0.381654	0.000108603	0.00639912
79646	PANK3	-0.427077	0.000109034	0.00640192
5920	RARRES3	0.599756	0.000111444	0.00652046
26471	NUPR1	0.740389	0.000113079	0.00657001
84251	SGIP1	-0.205217	0.000112767	0.00657001
55585	UBE2Q1	-0.32389	0.000114176	0.0066107
6455	SH3GL1	-0.303917	0.000116434	0.00669498
9308	CD83	0.381657	0.000116354	0.00669498
23475	QPRT	0.320809	0.000117419	0.00670847
728743	LOC728743	-0.306891	0.000117474	0.00670847
55512	SMPD3	-0.33813	0.000122573	0.00697424
23269	MGA	0.344205	0.000122964	0.00697424
402	ARL2	0.270376	0.000126675	0.00711215
27250	PDCD4	0.245183	0.000126367	0.00711215
836	CASP3	-0.302054	0.000126379	0.00711215
91300	R3HDM4	-0.253583	0.000127469	0.00712516
5270	SERPINE2	-0.509849	0.000128031	0.00712516
25758	C11orf41	-0.378177	0.000128189	0.00712516
29906	ST8SIA5	-0.35756	0.000131461	0.00726111
100129460	DPY19L1P1	0.480836	0.000131506	0.00726111
84129	ACAD11	0.454068	0.000132617	0.00729833
79970	ZNF767	0.303224	0.000134025	0.00735154
143884	CWF19L2	0.422788	0.000135613	0.00741424
85236	HIST1H2BK	-0.403234	0.000139164	0.00758351
8938	BAIAP3	0.53385	0.000140119	0.00758601
950	SCARB2	0.312127	0.00013972	0.00758601
57103	C12orf5	-0.54525	0.00014157	0.00763976
26017	FAM32A	-0.180899	0.000142676	0.00767459
27327	TNRC6A	0.198348	0.00014359	0.0076989
60485	SAV1	0.348481	0.000144429	0.00771336
84140	FAM161A	0.389031	0.000144785	0.00771336
84747	UNC119B	0.308465	0.000147799	0.00784887
9665	KIAA0430	0.463438	0.000150871	0.00797491
55125	CEP192	0.332382	0.000151129	0.00797491
10368	CACNG3	-0.39064	0.000155279	0.00816805
7704	ZBTB16	0.488646	0.000156351	0.00819859
79039	DDX54	-0.296902	0.000160571	0.00832702
8996	NOL3	0.277103	0.000160475	0.00832702
9911	TMCC2	0.266856	0.00015965	0.00832702
2823	GPM6A	-0.297082	0.000160798	0.00832702
5860	QDPR	0.351806	0.000168247	0.00868581
23051	ZHX3	0.227003	0.000172299	0.00886754
23315	SLC9A8	0.319834	0.000176272	0.00904411
23086	EXPH5	-0.418385	0.000178712	0.00914118
100507577	LOC100507577	0.408952	0.000185257	0.00944698
55853	IDI2-AS1	0.438465	0.000186266	0.00946946
3482	IGF2R	0.27238	0.000187005	0.00947812
379	ARL4D	-0.420438	0.000187858	0.00948479
9717	SEC14L5	0.432955	0.000188274	0.00948479
91754	NEK9	0.366565	0.000189629	0.00952429
54886	LPPR1	-0.342009	0.000190794	0.00955403
100131755	ARMCX4	0.270322	0.000191617	0.0095665
9267	CYTH1	0.419418	0.000194747	0.00963622
84989	LOC84989	-0.227045	0.00019458	0.00963622
3653	IPW	0.498619	0.000194233	0.00963622
1497	CTNS	0.532053	0.00019768	0.00972365
10233	LRRC23	0.237611	0.000197479	0.00972365
79161	C7orf23	0.3227	0.000200934	0.009797
80208	SPG11	0.262496	0.00020081	0.009797
5189	PEX1	0.401036	0.000200626	0.009797
2044	EPHA5	-0.569211	0.000202632	0.00983052
8913	CACNA1G	-0.187807	0.000202801	0.00983052
10092	ARPC5	-0.352606	0.000208377	0.0100716
84722	PSRC1	0.379201	0.000211334	0.0101594
26059	ERC2	-0.36101	0.000211414	0.0101594
50632	CALY	0.269172	0.000215644	0.0103033
54793	KCTD9	0.291644	0.000215272	0.0103033
10318	TNIP1	0.216229	0.000217591	0.0103667
2558	GABRA5	-0.514479	0.000220502	0.0104754
5595	MAPK3	0.296887	0.000230741	0.0109307
26153	KIF26A	-0.341421	0.000235704	0.0111342
3575	IL7R	-0.509022	0.000237901	0.0112062
57670	KIAA1549	-0.235194	0.000248618	0.0115941
55509	BATF3	-0.455512	0.000246872	0.0115941
10466	COG5	0.239647	0.000248174	0.0115941
57020	C16orf62	0.228639	0.000248916	0.0115941
2099	ESR1	-0.223388	0.000253357	0.0116765
26575	RGS17	-0.41399	0.000253394	0.0116765
5332	PLCB4	-0.324229	0.000252806	0.0116765
84966	IGSF21	-0.34717	0.000253486	0.0116765
390275	OR8A1	-0.257192	0.000254423	0.0116873
6563	SLC14A1	1.1635	0.000256668	0.0117581
3776	KCNK2	-0.373031	0.000257703	0.0117732
57452	GALNTL1	0.376537	0.000261142	0.0118652
4430	MYO1B	-0.374526	0.000260837	0.0118652
54555	DDX49	-0.231662	0.000265552	0.0120328
284408	LOC284408	-0.423264	0.000266963	0.012064
9125	RQCD1	-0.313685	0.000269673	0.0121074
2200	FBN1	0.364515	0.00026984	0.0121074
5934	RBL2	0.266299	0.000270102	0.0121074
27031	NPHP3	0.556973	0.000271259	0.0121267
4820	NKTR	0.291549	0.000275387	0.0122783
55704	CCDC88A	0.300116	0.000279494	0.0124282
23546	SYNGR4	-0.188969	0.000280379	0.0124344
10891	PPARGC1A	0.391424	0.000282403	0.0124579
57644	MYH7B	0.41397	0.000281689	0.0124579
341	APOC1	-0.538847	0.000285569	0.0125643
5833	PCYT2	0.155621	0.000295001	0.0129451
375196	LOC375196	-0.440875	0.000298005	0.0130426
23640	HSPBP1	-0.260256	0.000299358	0.0130675
53838	C11orf24	-0.345695	0.000301041	0.0131067
124446	TMEM219	0.313594	0.000305788	0.0132787
582	BBS1	0.289341	0.000306687	0.0132831
85444	LRRCC1	0.430087	0.000309703	0.013379
4883	NPR3	-0.538424	0.000313691	0.0135163
51076	CUTC	0.234314	0.000319097	0.0137138
64853	AIDA	0.278196	0.000321408	0.0137776
378706	RN7SL2	0.550477	0.000323392	0.0138271
246330	PELI3	0.468008	0.000324998	0.0138602
55270	NUDT15	-0.335082	0.000327056	0.013877
4599	MX1	0.385184	0.000326339	0.013877
3799	KIF5B	0.331334	0.000329147	0.013895
56884	FSTL5	-0.423227	0.000328321	0.013895
55914	ERBB2IP	0.321685	0.000330434	0.0139141
2644	GCHFR	0.279288	0.000331325	0.0139165
645323	LINC00461	-0.344784	0.000336223	0.0140007
5091	PC	0.250172	0.000336689	0.0140007
64855	FAM129B	-0.393008	0.000335506	0.0140007
2645	GCK	-0.238698	0.000336287	0.0140007
79923	NANOG	0.305412	0.000339007	0.0140621
51339	DACT1	-0.445717	0.000349021	0.0144099
81578	COL21A1	0.455322	0.000349121	0.0144099
889	KRIT1	0.232029	0.000350424	0.014428
27252	KLHL20	0.31341	0.000363321	0.0149221
158427	TSTD2	0.218574	0.000368542	0.0150728
51244	C3orf19	0.260818	0.000368797	0.0150728
5311	PKD2	0.381837	0.000371339	0.0151026
55286	C4orf19	-0.575767	0.000370673	0.0151026
29997	GLTSCR2	0.195416	0.000373112	0.0151378
9760	TOX	0.529927	0.000374155	0.0151433
55844	PPP2R2D	-0.242341	0.000376333	0.0151716
64784	CRTC3	0.447781	0.000377313	0.0151716
9536	PTGES	-0.347709	0.000377583	0.0151716
116135	LRRC3B	-0.470962	0.000379479	0.0151989
6867	TACC1	0.248323	0.000380085	0.0151989
5394	EXOSC10	0.22229	0.000387064	0.0154409
2166	FAAH	0.358563	0.000389942	0.0155186
128989	C22orf25	0.269224	0.000393484	0.0156199
84727	SPSB2	0.488338	0.000394361	0.0156199
10250	SRRM1	0.207956	0.000397042	0.0156888
57475	PLEKHH1	0.477285	0.000398451	0.0157073
5149	PDE6H	0.458974	0.000402325	0.0158226
55753	OGDHL	0.35973	0.000407606	0.0159719
79987	SVEP1	0.541577	0.000408037	0.0159719
1024	CDK8	-0.256893	0.000409402	0.0159878
491	ATP2B2	-0.323521	0.000411047	0.0160145
896	CCND3	0.262392	0.000414086	0.0160953
29952	DPP7	0.263333	0.000420122	0.0162542
4090	SMAD5	0.290147	0.00041993	0.0162542
51148	CERCAM	0.488058	0.000424331	0.0163411
51285	RASL12	0.551288	0.000423735	0.0163411
57554	LRRC7	-0.489727	0.000428067	0.016447
339768	ESPNL	-0.372795	0.000429302	0.0164566
203069	R3HCC1	-0.217045	0.000431083	0.016487
23101	MCF2L2	0.406288	0.000434185	0.0165676
113220	KIF12	-0.309465	0.000436532	0.0166191
84557	MAP1LC3A	-0.202108	0.000442588	0.0167468
633	BGN	0.413457	0.000442898	0.0167468
79000	C1orf135	-0.299508	0.000441496	0.0167468
1073	CFL2	0.209101	0.000448658	0.0169262
1808	DPYSL2	0.216922	0.000452256	0.0170234
84514	GHDC	0.283807	0.000463895	0.0174222
6567	SLC16A2	-0.280494	0.000467922	0.0175339
3290	HSD11B1	0.505462	0.000472437	0.0176634
79780	CCDC82	0.280955	0.000474695	0.0177081
221400	TDRD6	0.496441	0.000479969	0.0178395
83874	TBC1D10A	-0.252224	0.000480355	0.0178395
4838	NODAL	-0.355007	0.000482	0.0178608
594842	HAS2-AS1	-0.400949	0.000484925	0.0179293
572	BAD	-0.233797	0.000488416	0.0179742
54492	NEURL1B	-0.399459	0.000490449	0.0179742
28992	MACROD1	0.343916	0.000489428	0.0179742
3148	HMGB2	0.379928	0.00048995	0.0179742
91746	YTHDC1	0.234436	0.000494628	0.018048
10221	TRIB1	-0.562965	0.000494475	0.018048
254102	EHBP1L1	-0.308469	0.000497502	0.0181132
221294	NT5DC1	0.395642	0.000504406	0.0183246
2185	PTK2B	0.230168	0.00050769	0.0184038
5802	PTPRS	-0.170156	0.00051385	0.0185867
79095	C9orf16	-0.231465	0.000519154	0.0187379
8372	HYAL3	-0.38583	0.000527061	0.0189821
9263	STK17A	-0.347063	0.000529138	0.0190159
23504	RIMBP2	-0.312855	0.00054111	0.0193753
406	ARNTL	-0.387028	0.000541464	0.0193753
3707	ITPKB	0.304569	0.000545748	0.0194868
1116	CHI3L1	0.708318	0.000549383	0.0195747
11282	MGAT4B	-0.203896	0.000554291	0.0197075
79017	GGCT	-0.312656	0.000555715	0.0197161
7802	DNALI1	0.472264	0.00055926	0.0197474
56987	BBX	0.323847	0.000560151	0.0197474
7322	UBE2D2	-0.171876	0.000559813	0.0197474
54882	ANKHD1	0.224733	0.000565501	0.0198939
79041	TMEM38A	-0.347075	0.000569445	0.0199905
93099	DMKN	0.263532	0.000576278	0.0201562
10669	CGREF1	-0.234531	0.000576583	0.0201562
6696	SPP1	0.98146	0.000578908	0.0201952
830	CAPZA2	-0.45119	0.000582855	0.0202481
64131	XYLT1	-0.389818	0.000584068	0.0202481
575	BAI1	-0.372829	0.000582577	0.0202481
9525	VPS4B	0.286709	0.000587839	0.0203365
2977	GUCY1A2	-0.368909	0.00059347	0.0204784
349667	RTN4RL2	-0.208452	0.000595623	0.0204784
1734	DIO2	-0.707935	0.0005944	0.0204784
3612	IMPA1	0.249799	0.000598127	0.0205221
25945	PVRL3	-0.410584	0.000599369	0.0205225
23075	SWAP70	0.31665	0.000606949	0.0206215
55133	SRBD1	0.301553	0.000608442	0.0206215
57596	BEGAIN	-0.325909	0.000607526	0.0206215
79741	C10orf68	0.349716	0.000606356	0.0206215
1958	EGR1	-0.746409	0.000607382	0.0206215
4607	MYBPC3	-0.165246	0.000613804	0.0206771
6014	RIT2	-0.582338	0.000611651	0.0206771
3300	DNAJB2	0.319017	0.000612565	0.0206771
9459	ARHGEF6	0.344469	0.000617166	0.0207067
55213	RCBTB1	0.35564	0.000616293	0.0207067
1122	CHML	-0.431165	0.000624568	0.020913
1047	CLGN	0.361887	0.000626783	0.0209451
29994	BAZ2B	0.334942	0.000629578	0.0209964
8481	OFD1	0.256632	0.000639055	0.0212699
57519	STARD9	0.314826	0.000654429	0.0217383
197358	NLRC3	-0.426486	0.000660491	0.0218072
23492	CBX7	0.283352	0.000661736	0.0218072
65078	RTN4R	-0.309587	0.000659981	0.0218072
23786	BCL2L13	0.191952	0.000658246	0.0218072
28951	TRIB2	-0.30902	0.000669741	0.0218237
9213	XPR1	-0.226605	0.000668656	0.0218237
56906	THAP10	0.387465	0.000665723	0.0218237
151195	CCNYL1	-0.138223	0.000669289	0.0218237
26251	KCNG2	-0.304849	0.000668151	0.0218237
389206	BEND4	-0.432951	0.00067009	0.0218237
9961	MVP	0.450214	0.000683319	0.0222112
126695	C1orf172	0.316074	0.000688766	0.0222581
55706	TMEM48	-0.297049	0.000686459	0.0222581
3661	IRF3	0.180413	0.000687949	0.0222581
378805	FLJ43663	0.284218	0.00069153	0.0223042
57718	PPP4R4	-0.411437	0.000699173	0.0225072
200205	IBA57	-0.343963	0.000701415	0.0225174
7181	NR2C1	0.232337	0.00070349	0.0225174
1355	COX15	0.203224	0.000703543	0.0225174
11129	CLASRP	0.337422	0.000709471	0.0226441
55733	HHAT	0.425881	0.000710218	0.0226441
10153	CEBPZ	0.232686	0.000718529	0.0227785
91748	C14orf43	0.353393	0.000717641	0.0227785
126567	C2CD4C	-0.389851	0.000717504	0.0227785
672	BRCA1	0.359955	0.000724774	0.0228894
92815	HIST3H2A	-0.334076	0.000723946	0.0228894
27115	PDE7B	-0.404667	0.000729777	0.0230038
10123	ARL4C	-0.233722	0.000731422	0.0230122
5127	CDK16	-0.176528	0.000742448	0.0233151
6511	SLC1A6	-0.414653	0.000746422	0.0233519
9806	SPOCK2	0.36004	0.000746417	0.0233519
54847	SIDT1	0.37361	0.000748412	0.0233703
10647	SCGB1D2	0.515443	0.00075305	0.0234712
5549	PRELP	0.395438	0.000756861	0.023546
55191	NADSYN1	0.322661	0.000760229	0.0235846
9053	MAP7	0.43442	0.000762345	0.0235846
3822	KLRC2	-0.9847	0.000762073	0.0235846
26112	CCDC69	0.324395	0.000767953	0.0237141
4926	NUMA1	0.298056	0.000769794	0.023727
64398	MPP5	0.291876	0.000773972	0.0238118
79686	LINC00341	0.598279	0.000781392	0.0239259
813	CALU	-0.277569	0.000781987	0.0239259
10109	ARPC2	-0.261443	0.000781372	0.0239259
286189	LOC286189	-0.40799	0.000791374	0.0241246
57565	KLHL14	-0.692598	0.000790221	0.0241246
6094	ROM1	0.473158	0.000794832	0.0241491
1783	DYNC1LI2	0.2709	0.000798337	0.0241491
199699	DAND5	-0.343514	0.000795534	0.0241491
165	AEBP1	0.512029	0.000796921	0.0241491
9797	TATDN2	-0.211903	0.000800294	0.0241491
59283	CACNG8	-0.282518	0.000800865	0.0241491
230	ALDOC	0.316548	0.000807653	0.0242223
641977	SEPT7P2	0.316315	0.000806478	0.0242223
3356	HTR2A	-0.380642	0.000807401	0.0242223
23258	DENND5A	0.283214	0.000814809	0.0243931
55920	RCC2	0.283151	0.000818645	0.024464
1642	DDB1	0.172685	0.000824877	0.0246061
84899	TMTC4	0.456455	0.000834954	0.0248179
22881	ANKRD6	-0.244195	0.000834662	0.0248179
10241	CALCOCO2	0.343082	0.000837002	0.0248345
25778	DSTYK	0.290316	0.000845878	0.0250533
8777	MPDZ	0.185521	0.000848962	0.0251001
100129550	LOC100129550	-0.279586	0.000852353	0.0251455
9935	MAFB	-0.31631	0.000853515	0.0251455
23500	DAAM2	0.62439	0.000855567	0.0251615
25928	SOSTDC1	0.550611	0.000863984	0.0253643
221060	C10orf111	-0.361268	0.000870406	0.0254632
54664	TMEM106B	0.313784	0.000869906	0.0254632
324	APC	-0.217948	0.000884498	0.025785
10769	PLK2	-0.382676	0.000883049	0.025785
627	BDNF	-0.202955	0.000887206	0.0258188
8831	SYNGAP1	-0.450386	0.000890464	0.0258234
1390	CREM	-0.20344	0.000889762	0.0258234
9625	AATK	0.236425	0.000897943	0.0259951
171568	POLR3H	0.163157	0.000911919	0.0263207
22948	CCT5	-0.339627	0.000913539	0.0263207
84851	TRIM52	0.383429	0.000913925	0.0263207
4692	NDN	-0.334091	0.000920342	0.0264184
120	ADD3	0.301105	0.000920486	0.0264184
401442	LOC401442	-0.559822	0.000924753	0.0264238
375790	AGRN	-0.391643	0.000930834	0.0264238
9919	SEC16A	0.282387	0.000937444	0.0264238
140771	SMCR5	0.23466	0.000931528	0.0264238
2812	GP1BB	-0.358137	0.000934771	0.0264238
219654	ZCCHC24	0.519885	0.000939689	0.0264238
9679	FAM53B	0.258468	0.000930955	0.0264238
339390	CLEC4G	-0.360448	0.000934705	0.0264238
387921	NHLRC3	0.294082	0.00093841	0.0264238
339456	TMEM52	-0.149618	0.000937378	0.0264238
114819	CROCCP3	0.287711	0.000932366	0.0264238
100128071	LOC100128071	0.333923	0.000935521	0.0264238
80069	C6orf208	0.347701	0.000956817	0.0268601
199221	DZIP1L	0.475519	0.000958924	0.026874
5912	RAP2B	-0.261229	0.000971386	0.0271776
25943	C20orf194	0.300143	0.000974795	0.0272273
146057	TTBK2	0.431912	0.000980101	0.0273297
22800	RRAS2	-0.190898	0.000990711	0.0275335
147339	C18orf25	-0.171644	0.000990459	0.0275335
5443	POMC	-0.627584	0.000995151	0.0276109
5743	PTGS2	-0.550659	0.000999757	0.0276926
79932	KIAA0319L	0.198196	0.00101036	0.0279399
11240	PADI2	0.601447	0.00102151	0.0282013
126231	ZNF573	0.309698	0.00102691	0.0283037
3426	CFI	0.665083	0.00104054	0.028632
103910	MYL12B	-0.275684	0.00104575	0.0286385
283537	SLC46A3	0.25758	0.00104593	0.0286385
78990	OTUB2	-0.329096	0.00104591	0.0286385
79443	FYCO1	0.373717	0.00105301	0.028785
56660	KCNK12	-0.241327	0.00107307	0.0292665
283345	RPL13P5	0.342856	0.00107413	0.0292665
429	ASCL1	0.230558	0.00109014	0.0295324
80319	CXXC4	-0.274285	0.00109097	0.0295324
117154	DACH2	0.250431	0.00108985	0.0295324
143903	LAYN	0.594052	0.00109083	0.0295324
25876	SPEF1	-0.33349	0.00109452	0.0295804
7432	VIP	-0.66328	0.00110293	0.0297594
23244	PDS5A	0.201104	0.00110617	0.0297987
5460	POU5F1	-0.259392	0.00110937	0.0298367
65110	UPF3A	0.264652	0.00111426	0.02992
1297	COL9A1	-0.165125	0.00112625	0.0301934
800	CALD1	0.340384	0.00112887	0.0302148
50485	SMARCAL1	0.218187	0.00113231	0.0302586
57168	ASPHD2	-0.388986	0.00114173	0.0304615
1998	ELF2	0.18392	0.0011494	0.030511
4088	SMAD3	-0.225344	0.00115091	0.030511
201292	TRIM65	0.214825	0.00114707	0.030511
112703	FAM71E1	-0.355575	0.00114957	0.030511
23017	FAIM2	0.448639	0.00115972	0.0306957
80816	ASXL3	-0.267148	0.00116568	0.0308046
285527	FRYL	0.418245	0.00116837	0.0308269
84620	ST6GAL2	-0.424958	0.00118197	0.0311364
80227	PAAF1	0.243074	0.00118544	0.0311785
116984	ARAP2	0.272296	0.0011971	0.0312878
2186	BPTF	0.19486	0.00119415	0.0312878
23510	KCTD2	0.261873	0.00119461	0.0312878
56259	CTNNBL1	-0.180245	0.00119694	0.0312878
79725	THAP9	0.401831	0.00119972	0.0313071
64397	ZFP106	0.330304	0.00120711	0.0314055
6324	SCN1B	0.289879	0.00120725	0.0314055
203102	ADAM32	0.275161	0.0012118	0.0314524
64849	SLC13A3	0.476682	0.00121283	0.0314524
221061	FAM171A1	0.224826	0.00123891	0.0320789
9354	UBE4A	0.25346	0.00124487	0.0321832
5869	RAB5B	0.169662	0.00125918	0.0324037
391634	HSP90AB2P	0.499627	0.00125923	0.0324037
7476	WNT7A	-0.370231	0.00125743	0.0324037
54345	SOX18	-0.560024	0.00126592	0.0325257
2978	GUCA1A	-0.391028	0.00126926	0.0325614
51617	HMP19	-0.211742	0.00129416	0.0330663
9857	CEP350	0.362468	0.00129687	0.0330663
4659	PPP1R12A	0.234697	0.00129407	0.0330663
57798	GATAD1	0.302868	0.0012957	0.0330663
64208	POPDC3	0.321115	0.00129922	0.0330756
100506870	LOC100506870	-0.417365	0.00130294	0.0331197
29982	NRBF2	-0.205968	0.00130945	0.0332344
5818	PVRL1	-0.168129	0.00131386	0.0332958
56650	CLDND1	0.554017	0.00131732	0.0333327
12	SERPINA3	1.03527	0.00132334	0.0333362
23160	WDR43	0.27226	0.00132545	0.0333362
29940	DSE	0.379005	0.00132435	0.0333362
261729	STEAP2	0.379786	0.00131993	0.0333362
5372	PMM1	-0.229787	0.00134421	0.0337571
79912	PYROXD1	0.309563	0.00134836	0.0338104
118924	FRA10AC1	0.341528	0.00135626	0.0339227
5338	PLD2	0.44397	0.00135691	0.0339227
8437	RASAL1	-0.31435	0.00137276	0.0342164
56995	TULP4	0.343653	0.00137196	0.0342164
29904	EEF2K	0.246013	0.00138817	0.034549
2766	GMPR	0.374129	0.00139426	0.0346488
388228	SBK1	-0.241817	0.0013965	0.0346528
26232	FBXO2	0.263048	0.00139966	0.0346796
83657	DYNLRB2	0.265551	0.00140643	0.0347706
51735	RAPGEF6	0.26186	0.00140959	0.0347706
54680	ZNHIT6	0.217961	0.0014093	0.0347706
79789	CLMN	0.514841	0.00141621	0.0348824
161394	SAMD15	-0.351099	0.00143089	0.0350883
468	ATF4	-0.211517	0.00142886	0.0350883
4291	MLF1	-0.225775	0.00142959	0.0350883
63933	CCDC90A	0.218325	0.00143579	0.0351092
23012	STK38L	0.496292	0.00143595	0.0351092
25925	ZNF521	-0.280775	0.00143981	0.035152
60386	SLC25A19	-0.219867	0.00145187	0.0352841
9955	HS3ST3A1	-0.465822	0.00145321	0.0352841
51231	VRK3	-0.366147	0.00145368	0.0352841
83869	TTTY14	-0.237417	0.00144871	0.0352841
6697	SPR	0.297228	0.0014594	0.0353237
3309	HSPA5	-0.318785	0.00145955	0.0353237
874	CBR3	0.364327	0.00147112	0.0355484
9731	CEP104	0.311592	0.0014731	0.0355484
339287	MSL1	-0.183208	0.00149603	0.0360495
116362	RBP7	0.814933	0.00150066	0.0361088
25894	PLEKHG4	0.307039	0.00150339	0.0361174
64221	ROBO3	0.327773	0.00150534	0.0361174
6787	NEK4	0.213915	0.0015098	0.0361723
8482	SEMA7A	-0.458776	0.00151646	0.0362796
55852	TEX2	0.240802	0.00152011	0.036315
11151	CORO1A	-0.23884	0.00152392	0.0363538
55505	NOP10	-0.292082	0.00154953	0.0367152
3691	ITGB4	0.287918	0.0015458	0.0367152
83699	SH3BGRL2	0.298673	0.00154668	0.0367152
344558	SH3RF3	-0.213788	0.00155008	0.0367152
6730	SRP68	0.220414	0.0015464	0.0367152
1641	DCX	-0.204692	0.00156156	0.0369349
153222	C5orf41	0.305977	0.00156801	0.0370347
25903	OLFML2B	-0.433771	0.00157973	0.0372062
126	ADH1C	0.45306	0.00157925	0.0372062
8553	BHLHE40	0.436162	0.00159201	0.0374424
65990	FAM173A	-0.246574	0.00160619	0.0377229
55351	STK32B	-0.272872	0.001619	0.0379702
10015	PDCD6IP	0.284359	0.00163886	0.0383821
258010	SVIP	0.395437	0.001644	0.0383945
25854	FAM149A	-0.300723	0.00164232	0.0383945
28970	C11orf54	0.294451	0.00166398	0.0387182
11260	XPOT	0.226285	0.00166264	0.0387182
399687	MYO18A	0.276016	0.00166483	0.0387182
199223	TTC21A	0.311552	0.00167732	0.0389545
133584	EGFLAM	-0.120146	0.00168455	0.039068
7994	KAT6A	0.26553	0.00169011	0.0391422
79140	CCDC28B	-0.21731	0.00169245	0.0391422
55240	STEAP3	0.244908	0.00169791	0.0391797
126823	KLHDC9	0.276378	0.00169876	0.0391797
84817	TXNDC17	-0.177967	0.00170182	0.0391959
65999	LRRC61	-0.325399	0.00171343	0.0394089
55691	FRMD4A	-0.169226	0.00172585	0.0395853
83468	GLT8D2	-0.333734	0.00172353	0.0395853
23303	KIF13B	0.317685	0.00172906	0.0396046
79033	ERI3	-0.214454	0.00173477	0.0396808
121260	SLC15A4	0.256342	0.0017455	0.0398716
91012	CERS5	0.252362	0.00176483	0.0401481
4094	MAF	-0.308763	0.00176341	0.0401481
51253	MRPL37	-0.242861	0.00176384	0.0401481
865	CBFB	0.405515	0.00176894	0.0401812
64064	OXCT2	0.32503	0.00177419	0.0401812
80017	C14orf159	0.225978	0.00177593	0.0401812
83860	TAF3	0.422698	0.00177157	0.0401812
169834	ZNF883	-0.252517	0.00179204	0.0404323
8871	SYNJ2	0.391669	0.00179028	0.0404323
5322	PLA2G5	-0.687039	0.0017943	0.0404323
10434	LYPLA1	-0.243056	0.00180064	0.0404714
10102	TSFM	-0.237981	0.00180089	0.0404714
23014	FBXO21	0.240854	0.00180778	0.0405717
84552	PARD6G	0.282429	0.00183998	0.0409917
56171	DNAH7	0.354266	0.00182897	0.0409917
10555	AGPAT2	0.232202	0.00184388	0.0409917
4864	NPC1	0.273081	0.00183977	0.0409917
286053	NSMCE2	0.222931	0.00184616	0.0409917
11313	LYPLA2	-0.12431	0.00183195	0.0409917
84869	CBR4	0.229887	0.00184565	0.0409917
8427	ZNF282	-0.206145	0.00183999	0.0409917
10675	CSPG5	-0.405579	0.00185301	0.0410891
7475	WNT6	-0.196688	0.00185692	0.041121
80315	CPEB4	0.379793	0.00186065	0.0411489
146433	IL34	-0.221498	0.00186525	0.0411961
55144	LRRC8D	0.279849	0.00187591	0.0413767
8226	HDHD1	0.292339	0.00187984	0.0414087
85001	MGC16275	0.407948	0.0018856	0.0414807
10950	BTG3	-0.329326	0.00190064	0.0416899
10401	PIAS3	0.223155	0.00190817	0.0416899
2786	GNG4	-0.206806	0.00191261	0.0416899
9479	MAPK8IP1	-0.181863	0.00190096	0.0416899
200014	CC2D1B	0.258418	0.00191218	0.0416899
55009	C19orf24	-0.213537	0.00190878	0.0416899
92	ACVR2A	-0.237297	0.00190907	0.0416899
123283	TARSL2	0.247697	0.00192313	0.0417554
10290	SPEG	-0.263313	0.00191845	0.0417554
1106	CHD2	0.149749	0.00192197	0.0417554
6651	SON	0.140915	0.00192672	0.041779
390264	OR10G4	0.18947	0.00193649	0.0419363
79412	KREMEN2	-0.348997	0.00194193	0.0419451
441376	C8orf85	-0.516523	0.00194079	0.0419451
83641	FAM107B	0.619305	0.00195056	0.0420772
146760	RTN4RL1	-0.192557	0.00195414	0.0420998
65992	DDRGK1	-0.234794	0.00196717	0.0423192
9217	VAPB	0.452115	0.0019694	0.0423192
23087	TRIM35	0.219679	0.00198101	0.0425139
80195	FAM213A	-0.19458	0.00198865	0.0425683
2067	ERCC1	-0.161333	0.00198619	0.0425683
2535	FZD2	-0.395949	0.00199742	0.0427013
339559	ZNF642	-0.315279	0.00200284	0.0427623
80727	TTYH3	-0.256848	0.00200748	0.0428065
79364	ZXDC	0.279991	0.00202423	0.0430679
5579	PRKCB	-0.431939	0.0020249	0.0430679
247	ALOX15B	0.566449	0.00203164	0.0431505
54816	ZNF280D	0.298783	0.00203396	0.0431505
84522	JAGN1	-0.187365	0.00204802	0.0433935
282974	STK32C	-0.273571	0.00205383	0.0434493
84289	ING5	0.323634	0.00205586	0.0434493
94234	FOXQ1	-0.427475	0.00206407	0.0435676
55502	HES6	0.342005	0.00207232	0.0436864
5305	PIP4K2A	0.313785	0.00208066	0.0438068
11137	PWP1	-0.189189	0.00208802	0.0439063
770	CA11	-0.289838	0.00210967	0.044139
28952	CCDC22	-0.270175	0.00210374	0.044139
26034	IPCEF1	0.404273	0.00210552	0.044139
27163	NAAA	0.368212	0.00210777	0.044139
399668	LINC00086	-0.250764	0.00211317	0.0441429
116254	C6orf72	0.276584	0.00211515	0.0441429
84515	MCM8	0.277182	0.00212463	0.0442796
65059	RAPH1	-0.207328	0.00212702	0.0442796
285830	HLA-F-AS1	0.214269	0.00213083	0.0443037
249	ALPL	-0.199879	0.0021411	0.0444619
55204	GOLPH3L	0.294819	0.00215495	0.0446383
1968	EIF2S3	0.270825	0.0021531	0.0446383
79692	ZNF322	0.267622	0.00216036	0.0446949
3268	AGFG2	0.178981	0.00216319	0.0446978
83714	NRIP2	0.29597	0.00218816	0.0447024
667	DST	0.247564	0.00219219	0.0447024
55755	CDK5RAP2	0.359491	0.00217747	0.0447024
5413	Septin 5	-0.211327	0.00218729	0.0447024
909	CD1A	-0.171179	0.0021781	0.0447024
26002	MOXD1	0.386558	0.0021929	0.0447024
8321	FZD1	-0.325797	0.00217007	0.0447024
63940	GPSM3	-0.290551	0.00218425	0.0447024
64928	MRPL14	-0.202875	0.00218528	0.0447024
1399	CRKL	0.229484	0.00217648	0.0447024
91966	CXorf40A	-0.193169	0.00219236	0.0447024
100302736	TMED7-TICAM2	0.286144	0.0022169	0.0450266
590	BCHE	-0.375807	0.00221177	0.0450266
55343	SLC35C1	-0.207942	0.00221537	0.0450266
6045	RNF2	-0.315714	0.0022219	0.0450731
26811	SNORD55	-0.230719	0.00222461	0.0450734
84162	KIAA1109	0.205328	0.00222854	0.0450982
6423	SFRP2	0.436234	0.00223168	0.045107
283481	LOC283481	0.32967	0.00224739	0.045288
5813	PURA	0.254118	0.00227499	0.045288
5927	KDM5A	0.343725	0.00226906	0.045288
10152	ABI2	-0.154684	0.00227298	0.045288
317671	RFESD	0.264502	0.0022701	0.045288
100129291	LOC100129291	-0.256492	0.00227291	0.045288
6775	STAT4	0.483227	0.00226725	0.045288
1787	TRDMT1	0.26431	0.00227594	0.045288
116372	LYPD1	-0.220417	0.00226455	0.045288
7185	TRAF1	0.54763	0.00224997	0.045288
1677	DFFB	0.405861	0.00227512	0.045288
5733	PTGER3	-0.287797	0.0022693	0.045288
54919	HEATR2	0.311673	0.00226139	0.045288
684959	SNORA25	0.362729	0.00231156	0.0459418
883	CCBL1	0.206625	0.002318	0.0460151
7188	TRAF5	-0.360407	0.00235557	0.0461023
8536	CAMK1	-0.333399	0.00233858	0.0461023
55667	DENND4C	0.248381	0.00233756	0.0461023
54457	TAF7L	-0.361856	0.00232969	0.0461023
6425	SFRP5	0.330882	0.00234806	0.0461023
2253	FGF8	-0.15989	0.00234585	0.0461023
79869	CPSF7	0.218433	0.00234011	0.0461023
10497	UNC13B	-0.23815	0.00234327	0.0461023
51780	KDM3B	0.222775	0.00232934	0.0461023
58526	MID1IP1	0.388742	0.00235538	0.0461023
221981	THSD7A	-0.359217	0.00234058	0.0461023
266743	NPAS4	-0.38616	0.00235045	0.0461023
55958	KLHL9	0.23009	0.00235861	0.0461076
23241	PACS2	0.32145	0.00238584	0.0465854
255631	COL24A1	-0.607889	0.00238897	0.0465918
23036	ZNF292	0.321936	0.00239402	0.0466358
8538	BARX2	-0.212836	0.00240017	0.0467011
55471	C2orf56	-0.234679	0.00243349	0.0472156
998	CDC42	-0.232171	0.00243511	0.0472156
81619	TSPAN14	-0.311456	0.00243391	0.0472156
80063	ATF7IP2	-0.229831	0.00246224	0.0476862
10570	DPYSL4	-0.187063	0.00246726	0.047728
7705	ZNF146	0.277161	0.00247419	0.0478066
346171	ZFP57	0.298374	0.00248584	0.0479208
6535	SLC6A8	0.301157	0.0024834	0.0479208
23306	TMEM194A	0.215865	0.00249255	0.0479464
283687	C15orf37	-0.163219	0.00249292	0.0479464
148808	MFSD4	-0.411086	0.00252127	0.0484356
9379	NRXN2	-0.229046	0.00253576	0.0486452
11064	CNTRL	0.236211	0.00253801	0.0486452
23078	KIAA0564	0.229689	0.00254488	0.0487209
51195	RAPGEFL1	-0.308411	0.00255905	0.048936
79992	AGPAT4-IT1	0.516727	0.00257575	0.0491988
253714	MMS22L	0.463322	0.00258003	0.0492243
90134	KCNH7	-0.282203	0.00260035	0.0494509
100505881	MAGI2-AS3	0.27023	0.00260858	0.0494509
79602	ADIPOR2	0.466985	0.00260971	0.0494509
9330	GTF3C3	0.150027	0.00260478	0.0494509
5660	PSAP	0.139767	0.00260544	0.0494509
23338	PHF15	0.261003	0.00260244	0.0494509
145226	RDH12	-0.263263	0.00262214	0.0496302
55752	Septin 11	-0.197193	0.00265114	0.0500654
4891	SLC11A2	0.262373	0.00264977	0.0500654
51635	DHRS7	0.231784	0.00265611	0.0500914
3017	HIST1H2BD	-0.397984	0.0026613	0.0500914
113177	IZUMO4	0.277829	0.00266153	0.0500914
774	CACNA1B	-0.237683	0.00267552	0.050298
8546	AP3B1	0.224454	0.00268509	0.050421
374659	HDDC3	0.181381	0.00269656	0.0505335
10573	MRPL28	-0.251653	0.00269714	0.0505335
643224	TUBBP5	-0.495438	0.00271354	0.0507838
84524	ZC3H8	-0.334967	0.00273161	0.0510645
11000	SLC27A3	0.320752	0.00273755	0.0511182
11076	TPPP	-0.146304	0.00274119	0.0511289
145773	FAM81A	0.429019	0.00274463	0.0511359
5747	PTK2	0.266203	0.00275429	0.0512587
54662	TBC1D13	0.228528	0.00276026	0.0513126
126353	C19orf21	-0.156647	0.00277072	0.0514497
7398	USP1	0.20647	0.00277386	0.0514506
4258	MGST2	0.258655	0.00277763	0.0514634
56961	SHD	0.373564	0.00278432	0.05153
339231	ARL16	-0.255469	0.00278986	0.0515752
5629	PROX1	0.491243	0.00280662	0.0517702
782	CACNB1	-0.220334	0.0028059	0.0517702
8941	CDK5R2	-0.429963	0.00281787	0.051806
100129781	LOC100129781	-0.380124	0.00281577	0.051806
58158	NEUROD4	-0.154552	0.00281296	0.051806
79664	NARG2	0.249352	0.0028308	0.0519292
83464	APH1B	0.18499	0.00282813	0.0519292
9651	PLCH2	-0.338793	0.00283923	0.0520266
54916	C14orf101	0.245108	0.00284986	0.0520498
221078	NSUN6	0.24761	0.00284915	0.0520498
10005	ACOT8	-0.294152	0.00284514	0.0520498
84125	LRRIQ1	0.314205	0.00286214	0.0521843
3208	HPCA	-0.352093	0.00286431	0.0521843
26058	GIGYF2	0.15086	0.00286662	0.0521843
114824	PNMA5	-0.384547	0.00287461	0.0522727
338328	GPIHBP1	0.483417	0.00288042	0.0523214
10023	FRAT1	0.30643	0.00288928	0.0524251
53904	MYO3A	-0.320902	0.00290064	0.052574
9636	ISG15	-0.395095	0.00291859	0.0527313
133383	C5orf35	0.586764	0.00291707	0.0527313
6734	SRPR	0.211641	0.0029188	0.0527313
26150	RIBC2	0.623732	0.00292564	0.0527977
576	BAI2	-0.147246	0.00294168	0.0530298
126792	B3GALT6	-0.212637	0.00295215	0.0531611
29922	NME7	-0.309998	0.00296772	0.0531863
2280	FKBP1A	-0.254019	0.0029695	0.0531863
200162	SPAG17	-0.281427	0.0029638	0.0531863
2108	ETFA	-0.264986	0.00295987	0.0531863
90634	N4BP2L1	0.232796	0.00296751	0.0531863
210	ALAD	0.18368	0.00299123	0.053518
5016	OVGP1	0.373072	0.00299983	0.0536143
84333	PCGF5	0.267073	0.00302534	0.05375
55367	PIDD	0.221451	0.00302156	0.05375
200879	LIPH	-0.308254	0.00302537	0.05375
63895	PIEZO2	0.687363	0.00302999	0.05375
23248	RPRD2	0.282547	0.00302466	0.05375
91851	CHRDL1	-0.370048	0.00302802	0.05375
54737	MPHOSPH8	0.193307	0.00302973	0.05375
100533467	BIVM-ERCC5	0.22153	0.0030395	0.0538553
342035	GLDN	0.774077	0.00304238	0.0538553
5499	PPP1CA	-0.212431	0.00306966	0.0542269
129138	ANKRD54	-0.239077	0.00307159	0.0542269
9411	ARHGAP29	-0.421788	0.00307313	0.0542269
9734	HDAC9	-0.33104	0.00307913	0.0542754
9229	DLGAP1	-0.223051	0.00308552	0.0543307
3622	ING2	-0.276851	0.00309787	0.0544905
1543	CYP1A1	-0.699557	0.00310723	0.0545975
23286	WWC1	-0.216288	0.00312015	0.0547668
51744	CD244	-0.298775	0.00312599	0.0547931
3821	KLRC1	-0.59473	0.00312822	0.0547931
10606	PAICS	0.223132	0.00314077	0.0549553
51542	VPS54	0.229344	0.00314772	0.055019
145438	FRMD6-AS1	0.395954	0.00315445	0.055079
57650	KIAA1524	-0.497419	0.00317487	0.0553776
7036	TFR2	0.20259	0.00318155	0.0554361
56938	ARNTL2	-0.376089	0.00319494	0.0556113
6256	RXRA	0.358955	0.00320178	0.0556142
202299	C5orf27	0.481993	0.00320146	0.0556142
285972	LOC285972	-0.512695	0.00321023	0.0556451
1676	DFFA	-0.141485	0.00320795	0.0556451
23313	KIAA0930	0.293032	0.00321611	0.0556686
116832	RPL39L	-0.265888	0.00321826	0.0556686
3157	HMGCS1	-0.447617	0.00322886	0.0557941
729770	LOC729770	-0.352883	0.00324673	0.0560448
5476	CTSA	0.196948	0.00325133	0.0560661
66000	TMEM108	-0.201702	0.00326272	0.0561586
84789	MGC2889	-0.254749	0.00326343	0.0561586
55036	CCDC40	0.464538	0.00328022	0.0563894
10242	KCNMB2	-0.212586	0.00328935	0.056488
7903	ST8SIA4	-0.22795	0.0032961	0.0565457
5082	PDCL	0.160695	0.00332154	0.0568288
2258	FGF13	-0.24969	0.00331671	0.0568288
57146	TMEM159	-0.35706	0.00332282	0.0568288
84327	ZBED3	0.469686	0.00332904	0.0568769
10268	RAMP3	-0.294557	0.00333854	0.0569225
5414	Septin 4	0.350724	0.0033364	0.0569225
54988	ACSM5	0.118503	0.00334257	0.056933
11325	DDX42	0.240231	0.00334946	0.056992
79960	PHF17	0.130209	0.00336499	0.0571979
4917	NTN3	-0.253922	0.00337527	0.0573142
145663	LOC145663	0.381335	0.0034055	0.0577688
55780	C6orf70	0.266131	0.00341851	0.0579027
10390	CEPT1	0.239226	0.00342034	0.0579027
4885	NPTX2	-0.368564	0.00343503	0.0580924
27173	SLC39A1	0.288673	0.00344347	0.0581375
120400	FAM55A	-0.272618	0.00344467	0.0581375
54809	SAMD9	-0.369869	0.00348473	0.0586948
3754	KCNF1	-0.254319	0.00348269	0.0586948
80274	SCUBE1	-0.234301	0.00351254	0.0591036
56475	RPRM	-0.322315	0.0035229	0.0592182
90	ACVR1	-0.225914	0.00353022	0.0592814
7423	VEGFB	0.236483	0.00354618	0.0594894
375323	LHFPL4	0.289912	0.00355614	0.0595367
4650	MYO9B	0.328636	0.00355466	0.0595367
57698	KIAA1598	0.331719	0.00356403	0.0595493
983	CDK1	-0.216031	0.00356087	0.0595493
7466	WFS1	0.220356	0.00356992	0.0595881
283951	C16orf91	-0.246655	0.00357516	0.0596159
389072	PLEKHM3	0.287832	0.00359198	0.0597768
11222	MRPL3	-0.232566	0.00359185	0.0597768
55130	ARMC4	-0.486634	0.00361488	0.0600478
113791	PIK3IP1	0.33456	0.00361859	0.0600478
51174	TUBD1	0.220652	0.00361907	0.0600478
7093	TLL2	0.425619	0.00362277	0.0600493
1020	CDK5	-0.220143	0.00363054	0.0601181
32	ACACB	0.241443	0.00363413	0.0601181
283807	FBXL22	0.273915	0.00364027	0.0601388
143689	PIWIL4	0.293206	0.00364259	0.0601388
154865	IQUB	0.2529	0.00366136	0.0603739
2912	GRM2	-0.263301	0.00366407	0.0603739
64714	PDIA2	0.348555	0.00366815	0.0603814
1936	EEF1D	0.270214	0.00367606	0.0604519
9659	PDE4DIP	-0.319878	0.00369556	0.0607128
79818	ZNF552	-0.222707	0.00370025	0.0607299
2107	ETF1	-0.146349	0.0037103	0.0608075
641	BLM	-0.156172	0.00371227	0.0608075
55891	LENEP	-0.176776	0.00372012	0.0608763
387893	SETD8	-0.206398	0.00372399	0.06088
6528	SLC5A5	-0.431347	0.00373466	0.0609946
8233	ZRSR2	0.234073	0.00374601	0.0611201
140901	STK35	0.284305	0.00377888	0.0615961
93624	TADA2B	0.169048	0.00378407	0.0616205
27106	ARRDC2	0.363856	0.00380088	0.0618339
2259	FGF14	-0.203425	0.00380564	0.0618509
158471	PRUNE2	0.336292	0.00382679	0.0621341
11065	UBE2C	-0.173244	0.00383191	0.0621566
29127	RACGAP1	-0.132472	0.00385082	0.0624028
8532	CPZ	-0.278522	0.00386061	0.0625006
90861	HN1L	0.577354	0.00386634	0.0625326
1767	DNAH5	-0.339535	0.00387565	0.0626225
80318	GKAP1	0.262156	0.0039666	0.0639681
57761	TRIB3	-0.280962	0.0039633	0.0639681
7596	ZNF45	-0.189303	0.00397686	0.0640716
4750	NEK1	0.150145	0.00398956	0.0641523
84002	B3GNT5	-0.380096	0.00398943	0.0641523
58986	TMEM8A	-0.307144	0.00400258	0.0642972
10904	BLCAP	0.186039	0.00400629	0.0642972
144699	FBXL14	0.233032	0.00401405	0.06436
22836	RHOBTB3	0.423448	0.00401836	0.064367
51306	FAM13B	0.325181	0.00403974	0.0644618
79623	GALNT14	-0.322648	0.0040347	0.0644618
57343	ZNF304	0.354485	0.00403612	0.0644618
23065	KIAA0090	0.191979	0.00403429	0.0644618
6103	RPGR	0.216351	0.00404953	0.0645564
7644	ZNF91	-0.23787	0.00405521	0.0645852
145282	MIPOL1	0.265628	0.00406796	0.0647264
79767	ELMO3	0.243501	0.00408464	0.0649298
157247	MGC27345	0.216888	0.00411854	0.0654063
2246	FGF1	0.256747	0.0041282	0.0654974
9957	HS3ST1	-0.262381	0.00418206	0.0657634
338758	LOC338758	-0.429168	0.00415049	0.0657634
4237	MFAP2	-0.197306	0.00416857	0.0657634
1139	CHRNA7	-0.42411	0.00417094	0.0657634
7431	VIM	0.402704	0.00418441	0.0657634
79640	C22orf46	0.271499	0.00416423	0.0657634
2065	ERBB3	0.636108	0.00418427	0.0657634
27440	CECR5	-0.129289	0.00415746	0.0657634
6613	SUMO2	-0.143615	0.00417466	0.0657634
5801	PTPRR	-0.375287	0.00418192	0.0657634
6767	ST13	0.175741	0.00419382	0.0658492
5092	PCBD1	0.266332	0.0042272	0.066311
64866	CDCP1	0.128179	0.00423764	0.0664123
389023	LOC389023	-0.379207	0.00426081	0.0667127
222950	NYAP1	-0.271349	0.00431446	0.0674662
285855	RPL7L1	-0.329257	0.00431702	0.0674662
8760	CDS2	0.17776	0.00432678	0.0675554
284359	IZUMO1	-0.326649	0.00434768	0.0678058
148229	ATP8B3	-0.260115	0.00435095	0.0678058
23336	SYNM	0.202191	0.00436232	0.0679194
23464	GCAT	0.198827	0.00440335	0.0680308
5062	PAK2	0.20142	0.00440606	0.0680308
79444	BIRC7	0.265702	0.00437833	0.0680308
5208	PFKFB2	0.177936	0.00440619	0.0680308
65062	TMEM237	0.187201	0.00439619	0.0680308
22941	SHANK2	-0.218525	0.00437794	0.0680308
1602	DACH1	-0.211607	0.00438219	0.0680308
5073	PARN	0.13396	0.0043975	0.0680308
10249	GLYAT	-0.235022	0.00440227	0.0680308
29116	MYLIP	-0.267371	0.00441888	0.0681095
113763	C7orf29	-0.364699	0.00441946	0.0681095
25799	ZNF324	0.190641	0.00442356	0.0681097
6038	RNASE4	0.245093	0.00443354	0.0681999
25874	BRP44	-0.152313	0.00444577	0.0681999
81552	VOPP1	-0.212722	0.00444195	0.0681999
1763	DNA2	0.310185	0.00444054	0.0681999
23321	TRIM2	0.318941	0.00447391	0.0685684
9516	LITAF	0.522143	0.0044977	0.0688698
80975	TMPRSS5	0.585814	0.00450265	0.0688823
22858	ICK	0.219765	0.00453423	0.0691778
27249	MMADHC	-0.264092	0.00453441	0.0691778
4296	MAP3K11	-0.214012	0.00453198	0.0691778
91419	XRCC6BP1	-0.343713	0.00455923	0.0694928
221895	JAZF1	-0.275333	0.00457557	0.0696147
9849	ZNF518A	0.215186	0.00457427	0.0696147
27012	KCNV1	-0.432917	0.00458864	0.0697499
11122	PTPRT	0.33102	0.00459429	0.0697722
7433	VIPR1	-0.20031	0.00466572	0.0703943
79139	DERL1	-0.31723	0.00466416	0.0703943
1200	TPP1	0.360335	0.0046531	0.0703943
8835	SOCS2	-0.250578	0.00466909	0.0703943
7139	TNNT2	0.425558	0.00467115	0.0703943
282969	C10orf125	-0.273232	0.0046537	0.0703943
1572	CYP2F1	-0.186558	0.00467325	0.0703943
7922	SLC39A7	-0.13921	0.00465383	0.0703943
7326	UBE2G1	-0.18247	0.00466085	0.0703943
84698	CAPS2	0.324991	0.00468131	0.070452
11039	SMA4	0.460574	0.0046927	0.0705598
90522	YIF1B	-0.152998	0.0047007	0.0706163
51673	TPPP3	0.40396	0.00470596	0.0706318
84460	ZMAT1	0.265349	0.0047108	0.0706408
148103	ZNF599	-0.246801	0.004744	0.0709473
1831	TSC22D3	0.209498	0.00473884	0.0709473
165918	RNF168	0.280345	0.00474306	0.0709473
79956	ERMP1	0.240842	0.0047648	0.0711945
84317	CCDC115	0.242245	0.00479697	0.0715469
26996	GPR160	-0.57275	0.00479463	0.0715469
242	ALOX12B	0.231721	0.00480855	0.0716555
79858	NEK11	0.295153	0.00481868	0.0716906
9938	ARHGAP25	-0.321432	0.0048195	0.0716906
114786	XKR4	-0.300898	0.00484585	0.0717625
790	CAD	0.172871	0.00483259	0.0717625
55749	CCAR1	0.181965	0.00483546	0.0717625
1848	DUSP6	-0.375603	0.00484579	0.0717625
3608	ILF2	-0.253608	0.00483808	0.0717625
79183	TTPAL	-0.253875	0.00486783	0.072024
146540	ZNF785	0.298773	0.00488106	0.0721325
10178	ODZ1	-0.189684	0.00488382	0.0721325
116179	TGM7	0.240239	0.00489853	0.0722858
9880	ZBTB39	0.22907	0.00491329	0.0723006
54361	WNT4	-0.207234	0.00491033	0.0723006
79077	DCTPP1	-0.277499	0.00491687	0.0723006
114794	ELFN2	-0.278396	0.00490812	0.0723006
23111	SPG20	0.387056	0.00493954	0.0725457
51020	HDDC2	0.233954	0.00494224	0.0725457
3927	LASP1	-0.187821	0.00496695	0.0728442
9337	CNOT8	0.234517	0.00499362	0.0731711
283867	LOC283867	-0.181563	0.00503415	0.0736355
10017	BCL2L10	-0.280594	0.00503171	0.0736355
219541	MED19	-0.183903	0.00504053	0.0736641
23635	SSBP2	-0.229232	0.00505028	0.073727
166012	CHST13	-0.306646	0.00505367	0.073727
6194	RPS6	0.114149	0.00506763	0.0738661
8495	PPFIBP2	0.393881	0.00507696	0.0738728
51074	APIP	0.273767	0.00507467	0.0738728
84128	WDR75	0.215222	0.00508364	0.0739056
55334	SLC39A9	0.183057	0.00508825	0.0739081
124975	GGT6	-0.350181	0.00512739	0.0744118
91949	COG7	0.184796	0.00513481	0.0744548
103	ADAR	0.0944659	0.00514636	0.0744926
51054	PLEKHA8P1	0.316297	0.00514359	0.0744926
831	CAST	0.209882	0.00515106	0.0744961
51093	RRNAD1	0.172001	0.00515769	0.074505
54014	BRWD1	0.279198	0.00516062	0.074505
10468	FST	-0.233782	0.00517368	0.074629
10690	FUT9	-0.230987	0.005183	0.0746988
6448	SGSH	0.21701	0.00519207	0.0747004
222236	NAPEPLD	0.233467	0.00519131	0.0747004
225	ABCD2	-0.574728	0.00520114	0.0747664
54972	TMEM132A	-0.250945	0.00522923	0.0750408
79663	HSPBAP1	0.280232	0.00522603	0.0750408
374500	THSD1P1	0.382289	0.0052362	0.0750762
126382	NR2C2AP	-0.134946	0.00526442	0.075416
28513	CDH19	0.481349	0.00527399	0.0754883
6470	SHMT1	0.234461	0.00528575	0.0755916
100526693	ARPC4-TTLL3	0.235983	0.00529284	0.0756283
252995	FNDC5	-0.232421	0.00532653	0.0759793
259289	TAS2R43	0.260738	0.00532628	0.0759793
221935	SDK1	-0.338494	0.00534535	0.0761826
57553	MICAL3	0.210221	0.00535513	0.0762569
373156	GSTK1	0.165405	0.00536743	0.0763668
79961	DENND2D	0.311211	0.00537275	0.0763773
10346	TRIM22	0.391353	0.00539301	0.0765348
753	C18orf1	-0.301697	0.00539153	0.0765348
129642	MBOAT2	-0.204965	0.00540615	0.0766561
161829	EXD1	-0.221166	0.00543067	0.0768263
57594	HOMEZ	0.332841	0.00542467	0.0768263
9630	GNA14	0.408006	0.00543197	0.0768263
79684	C11orf61	0.252227	0.00545292	0.0770571
282973	JAKMIP3	0.363459	0.00545934	0.0770826
10868	USP20	0.217861	0.00547163	0.0771255
5830	PEX5	-0.158211	0.00546943	0.0771255
7298	TYMS	0.345296	0.00548983	0.0771862
766	CA7	-0.233234	0.00548315	0.0771862
83538	TTC25	0.230107	0.00548973	0.0771862
100132356	LOC100132356	0.392067	0.00550135	0.0772831
55608	ANKRD10	0.260021	0.00554301	0.0778028
8842	PROM1	-0.479887	0.00555516	0.0779077
23598	PATZ1	0.184985	0.00556607	0.0779951
85459	KIAA1731	0.244371	0.00557896	0.0780446
9837	GINS1	-0.332504	0.00557503	0.0780446
401068	LOC401068	0.413712	0.0055953	0.0782075
2531	KDSR	0.37074	0.00561863	0.0784679
1060	CENPC1	0.164309	0.00563244	0.0785949
1409	CRYAA	-0.230351	0.00564742	0.0787381
1994	ELAVL1	-0.134155	0.00565843	0.0787556
148109	FAM187B	-0.21066	0.00565363	0.0787556
4685	NCAM2	-0.280167	0.00566284	0.0787556
51260	CXorf26	-0.207722	0.00567868	0.0789101
84518	CNFN	-0.217878	0.00568809	0.0789749
38	ACAT1	0.209336	0.00569807	0.0790476
9465	AKAP7	0.264118	0.00570774	0.079116
10061	ABCF2	0.204425	0.0057403	0.0795013
285955	SPDYE1	0.224748	0.00574973	0.0795399
157922	CAMSAP1	-0.190286	0.00575263	0.0795399
114883	OSBPL9	0.218042	0.00576803	0.0796867
201163	FLCN	0.115626	0.00578262	0.0797328
51117	COQ4	0.182062	0.00578571	0.0797328
8459	TPST2	-0.268441	0.00577727	0.0797328
170371	C10orf128	0.302483	0.00582031	0.0797483
23317	DNAJC13	-0.212491	0.00580092	0.0797483
23195	MDN1	0.19752	0.00580936	0.0797483
80737	VWA7	-0.152298	0.00581589	0.0797483
54557	SGTB	-0.591683	0.00581374	0.0797483
50515	CHST11	-0.371109	0.00581173	0.0797483
6882	TAF11	-0.194208	0.00581655	0.0797483
2543	GAGE1	-0.387875	0.00582813	0.0797898
23625	FAM89B	-0.243841	0.00583479	0.0798155
9814	SFI1	0.266924	0.00583984	0.0798191
4638	MYLK	0.351306	0.00586821	0.0800756
254268	AKNAD1	0.380631	0.00586623	0.0800756
7745	ZNF192	-0.294204	0.0058827	0.0800768
84695	LOXL3	-0.131899	0.00587502	0.0800768
5345	SERPINF2	0.204415	0.00588174	0.0800768
5358	PLS3	0.237865	0.0059011	0.0802617
825	CAPN3	0.356078	0.00590611	0.0802643
389119	FAM212A	-0.167446	0.00591469	0.0803155
10631	POSTN	-0.273127	0.00595577	0.0808075
3556	IL1RAP	-0.236774	0.00596471	0.0808631
4808	NHLH2	0.351424	0.00597695	0.0809631
213	ALB	0.394255	0.00598669	0.0810293
79701	C17orf101	0.187572	0.00599886	0.0811281
100033813	SNORD115-39	0.449416	0.00600401	0.081132
146	ADRA1D	-0.26633	0.00600973	0.0811436
10425	ARIH2	0.166139	0.00601705	0.0811766
55015	PRPF39	0.285517	0.00602209	0.0811789
56143	PCDHA5	-0.245979	0.00604565	0.081365
134553	C5orf24	0.272321	0.00604094	0.081365
29028	ATAD2	0.266146	0.00605771	0.0814615
79968	WDR76	0.228256	0.00606583	0.081505
59272	ACE2	0.250397	0.00608988	0.0817222
100131998	RRN3P3	-0.25619	0.00609179	0.0817222
286343	C9orf150	0.313378	0.00613473	0.0821
92342	METTL18	0.237335	0.0061315	0.0821
9852	EPM2AIP1	0.171943	0.00613056	0.0821
285268	ZNF621	0.209971	0.00616132	0.0822579
79160	MGC4294	-0.297019	0.00616017	0.0822579
4336	MOBP	0.52398	0.00616026	0.0822579
158038	LINGO2	-0.296082	0.00617869	0.0823442
100506036	LOC100506036	0.285689	0.00618261	0.0823442
130916	MTERFD2	0.228767	0.00618193	0.0823442
6387	CXCL12	-0.310108	0.00618977	0.0823738
201191	SAMD14	0.293402	0.0062204	0.0826891
100508177	LOC100508177	-0.611452	0.00622337	0.0826891
11223	MST1P9	-0.232721	0.00622868	0.0826936
4597	MVD	-0.162621	0.00623811	0.082753
65109	UPF3B	0.218522	0.00626005	0.082978
190	NR0B1	-0.391181	0.00627374	0.0830536
10227	MFSD10	-0.158718	0.00627572	0.0830536
8997	KALRN	-0.166253	0.00629827	0.083286
23568	ARL2BP	0.153159	0.00630899	0.083353
5055	SERPINB2	-0.364786	0.00632333	0.083353
79685	SAP30L	0.124591	0.00631906	0.083353
23150	FRMD4B	0.510716	0.00631736	0.083353
197258	FUK	0.204297	0.00634707	0.0835998
85451	UNK	0.196456	0.00636041	0.0837094
11173	ADAMTS7	-0.194127	0.00639661	0.0839209
387751	GVINP1	-0.204671	0.00638827	0.0839209
1410	CRYAB	0.421405	0.00638275	0.0839209
8237	USP11	0.195282	0.00639258	0.0839209
23354	HAUS5	0.393158	0.00645412	0.0846089
51046	ST8SIA3	-0.381785	0.00646704	0.0847116
3572	IL6ST	0.300547	0.00648261	0.0848489
744	MPPED2	-0.216578	0.00648859	0.0848491
51098	IFT52	-0.192684	0.0064928	0.0848491
1607	DGKB	-0.408435	0.00650099	0.0848897
2115	ETV1	-0.260224	0.00650838	0.0849196
643854	CTAGE9	-0.29792	0.00652302	0.085044
152	ADRA2C	-0.216251	0.0065784	0.0856991
4842	NOS1	-0.149981	0.00659146	0.0858021
203238	C9orf93	0.141674	0.00659822	0.0858232
100132916	FAM159B	-0.358948	0.00663905	0.0861758
121441	NEDD1	0.375592	0.00664083	0.0861758
55319	C4orf43	0.180755	0.00663243	0.0861758
55906	ZC4H2	-0.201312	0.00671652	0.0870902
55616	ASAP3	0.339493	0.00672498	0.0871321
83608	C18orf21	-0.15628	0.00676718	0.0876109
115703	ARHGAP33	-0.223388	0.00678113	0.0876659
150572	SMYD1	-0.154338	0.00678195	0.0876659
5250	SLC25A3	-0.172741	0.00679381	0.0877512
55659	ZNF416	-0.171636	0.00680718	0.0878558
55314	TMEM144	0.690267	0.00683948	0.0882045
84230	LRRC8C	-0.244218	0.00685135	0.0882892
9882	TBC1D4	0.230034	0.00685677	0.0882909
134548	ANKRD43	-0.346435	0.00687245	0.0883656
80775	TMEM177	-0.279085	0.00687317	0.0883656
64789	DEM1	-0.215146	0.00690688	0.0887306
22807	IKZF2	-0.219498	0.00692242	0.0888617
159090	FAM122B	0.217508	0.00693559	0.0889623
8821	INPP4B	0.251197	0.00694951	0.0890723
6624	FSCN1	-0.23713	0.00697623	0.0892091
9209	LRRFIP2	0.128778	0.00697337	0.0892091
8728	ADAM19	-0.184468	0.00697071	0.0892091
51057	WDPCP	0.166795	0.00699053	0.0892717
54437	SEMA5B	-0.244494	0.00699183	0.0892717
1960	EGR3	-0.474065	0.00700477	0.0893684
7332	UBE2L3	0.243397	0.00701886	0.0894797
9232	PTTG1	-0.277659	0.00703309	0.0895926
55924	FAM212B	-0.191667	0.00705699	0.0898285
726	CAPN5	-0.209523	0.00706274	0.0898331
131375	LYZL4	-0.307968	0.00707015	0.0898588
27236	ARFIP1	0.193073	0.00707874	0.0898995
26045	LRRTM2	-0.205714	0.00708848	0.0899547
553158	PRR5-ARHGAP8	-0.227508	0.00709683	0.0899635
26953	RANBP6	0.28189	0.00712155	0.0899635
374868	ATP9B	0.201501	0.00710986	0.0899635
54929	TMEM161A	-0.147802	0.00711262	0.0899635
11238	CA5B	0.337888	0.00710087	0.0899635
646851	LOC646851	0.310302	0.00711728	0.0899635
10274	STAG1	0.232851	0.00713525	0.0900684
387036	GUSBP2	0.245877	0.00715895	0.090229
147694	ZNF548	-0.149874	0.00716421	0.090229
376940	ZC3H6	0.209775	0.00716386	0.090229
9993	DGCR2	0.262952	0.00721561	0.0907605
122402	TDRD9	0.515774	0.0072173	0.0907605
55110	MAGOHB	-0.224462	0.00722942	0.0908445
51072	MEMO1	-0.211247	0.00725105	0.0909792
3712	IVD	0.215897	0.00724953	0.0909792
57711	ZNF529	0.274793	0.00725801	0.090998
4087	SMAD2	-0.123945	0.00727375	0.0911269
9200	PTPLA	-0.2852	0.00732204	0.0915579
5256	PHKA2	0.122126	0.00732494	0.0915579
23097	CDK19	0.281502	0.00733012	0.0915579
79612	NAA16	0.174561	0.0073234	0.0915579
115752	DIS3L	0.213704	0.00735199	0.0916252
10768	AHCYL1	0.304458	0.00734144	0.0916252
7450	VWF	0.348991	0.00734719	0.0916252
26040	SETBP1	-0.208706	0.00738687	0.0919911
344148	NCKAP5	0.52714	0.00740978	0.0921431
155054	ZNF425	0.221452	0.00741013	0.0921431
113452	TMEM54	0.242033	0.00742451	0.0922531
1182	CLCN3	0.151686	0.00745939	0.092459
112936	VPS26B	-0.153275	0.00747577	0.092459
51279	C1RL	0.357305	0.00747206	0.092459
100033812	SNORD115-38	0.428025	0.00745246	0.092459
6736	SRY	-0.212636	0.00748123	0.092459
6900	CNTN2	0.486965	0.00745156	0.092459
55695	NSUN5	0.209458	0.00748926	0.092459
93134	ZNF561	-0.206226	0.00746926	0.092459
2729	GCLC	0.248657	0.00749098	0.092459
11243	PMF1	-0.168408	0.0075103	0.0926289
79155	TNIP2	0.219837	0.00752905	0.0927915
6574	SLC20A1	0.233054	0.00755233	0.0928434
23438	HARS2	0.141554	0.00754992	0.0928434
1777	DNASE2	0.172614	0.00754679	0.0928434
8724	SNX3	-0.204626	0.00755553	0.0928434
65989	DLK2	-0.146929	0.0075617	0.0928508
81300	OR4P4	-0.257755	0.00758701	0.0929009
23061	TBC1D9B	0.177225	0.00757869	0.0929009
50618	ITSN2	0.203976	0.00759364	0.0929009
57508	INTS2	0.263148	0.00757561	0.0929009
6827	SUPT4H1	-0.172575	0.00759348	0.0929009
60625	DHX35	0.197961	0.00762053	0.0931285
8859	STK19	-0.161092	0.00762873	0.0931285
8603	FAM193A	0.144314	0.007629	0.0931285
2890	GRIA1	-0.207016	0.00763727	0.0931613
440419	TBC1D3P5	-0.159704	0.00765193	0.0932534
9592	IER2	-0.318678	0.00765601	0.0932534
27255	CNTN6	-0.445351	0.00766847	0.093337
83546	RTBDN	-0.136315	0.00769449	0.0935854
286	ANK1	0.339016	0.00771239	0.0936665
154467	CCDC167	-0.204113	0.00771117	0.0936665
1123	CHN1	-0.165506	0.00773097	0.0938238
23517	SKIV2L2	0.144394	0.00773687	0.0938271
22979	EFR3B	-0.23771	0.00776103	0.0939193
150465	TTL	-0.252719	0.00776056	0.0939193
8357	HIST1H3H	-0.356707	0.0077636	0.0939193
538	ATP7A	0.207048	0.007767	0.0939193
55037	PTCD3	0.123868	0.00777972	0.094005
8480	RAE1	-0.271272	0.00780397	0.0942297
6584	SLC22A5	0.271872	0.00782306	0.0943918
27092	CACNG4	-0.313313	0.0078354	0.0944724
23603	CORO1C	0.218536	0.00787031	0.0948248
7089	TLE2	0.261933	0.00791168	0.0950259
93556	EGFEM1P	-0.17645	0.00789315	0.0950259
81615	TMEM163	-0.219094	0.0079155	0.0950259
29965	C16orf5	0.198525	0.00791124	0.0950259
729970	LOC729970	0.221031	0.00790231	0.0950259
245812	CNPY4	0.220249	0.00793628	0.0951373
255743	NPNT	-0.349727	0.00793512	0.0951373
2922	GRP	-0.318926	0.0079419	0.0951373
9705	ST18	0.680199	0.00795214	0.0951916
91608	RASL10B	-0.27828	0.00796342	0.0952583
55714	ODZ3	-0.203153	0.00799115	0.0955214
119504	ANAPC16	0.190005	0.00802585	0.0958198
347689	SOX2-OT	0.61493	0.0080276	0.0958198
55203	LGI2	-0.340979	0.00805487	0.0960765
55122	AKIRIN2	-0.262692	0.00806691	0.0961514
4067	LYN	-0.451954	0.00808789	0.0961951
6238	RRBP1	0.363512	0.00808511	0.0961951
51127	TRIM17	-0.231517	0.00808477	0.0961951
8317	CDC7	-0.2712	0.00813101	0.096639
51090	PLLP	0.53107	0.00814137	0.0966933
63929	XPNPEP3	-0.200481	0.00820157	0.097339
1007	CDH9	-0.363125	0.00821479	0.0974265
54482	CCDC76	0.258906	0.00823887	0.0976427
85417	CCNB3	0.216976	0.00832952	0.0984647
6468	FBXW4	0.191151	0.00832843	0.0984647
8614	STC2	0.292897	0.00833776	0.0984647
155066	ATP6V0E2	-0.193778	0.0083329	0.0984647
9877	ZC3H11A	0.256561	0.00832239	0.0984647
990	CDC6	-0.334557	0.00834464	0.0984762
783	CACNB2	-0.16828	0.00835136	0.0984858
219938	SPATA19	-0.206635	0.00836447	0.098501
59343	SENP2	0.170679	0.0083629	0.098501
51084	CRYL1	0.265241	0.00839139	0.0987484
5525	PPP2R5A	-0.177593	0.00840629	0.0987819
6385	SDC4	0.212429	0.00840766	0.0987819
285464	CRIPAK	0.289381	0.00841201	0.0987819
6262	RYR2	0.26733	0.00841821	0.0987852
23405	DICER1	0.184574	0.00846245	0.0992344
100526832	PHOSPHO2-KLHL23	-0.23523	0.00847975	0.0993675
51388	NIP7	-0.163063	0.00851645	0.0997273
164380	CSTT	-0.260854	0.0085522	0.100062
11266	DUSP12	-0.221442	0.00855699	0.100062
81894	SLC25A28	0.179427	0.00859582	0.100445
54875	CNTLN	0.23565	0.00861436	0.100591
5027	P2RX7	0.434983	0.00863756	0.100792
115362	GBP5	0.249467	0.00865309	0.100902
6941	TCF19	0.32841	0.0086726	0.101059
386685	KRTAP10-12	-0.146741	0.00870809	0.101402
6610	SMPD2	0.189779	0.0087543	0.101656
130612	TMEM198	-0.244208	0.00874663	0.101656
2921	CXCL3	-0.534145	0.00874995	0.101656
359948	IRF2BP2	0.253664	0.00874201	0.101656
28232	SLCO3A1	0.242432	0.00876448	0.101703
563	AZGP1	0.567391	0.00877605	0.101767
81550	TDRD3	0.170431	0.00880796	0.102066
51294	PCDH12	-0.350662	0.00881784	0.102109
8738	CRADD	-0.242082	0.00884184	0.102316
55552	ZNF823	-0.18481	0.00886155	0.102473
254128	LOC254128	0.194774	0.00890144	0.102798
10514	MYBBP1A	0.140247	0.00890198	0.102798
54832	VPS13C	0.266444	0.0089194	0.102928
83852	SETDB2	0.194983	0.00894815	0.103117
10140	TOB1	0.323095	0.00894596	0.103117
28969	BZW2	-0.209131	0.0089557	0.103123
23637	RABGAP1	0.136059	0.00896103	0.103123
85414	SLC45A3	-0.155629	0.0089904	0.10339
51714	SELT	-0.258526	0.00900209	0.103436
217	ALDH2	0.281422	0.00900688	0.103436
202559	KHDRBS2	-0.423998	0.00903472	0.103471
7442	TRPV1	0.146813	0.00903304	0.103471
340277	C7orf46	0.25079	0.00903355	0.103471
26154	ABCA12	-0.141325	0.00902253	0.103471
7072	TIA1	0.28722	0.0090584	0.103671
51275	C12orf47	-0.180706	0.00908848	0.103944
55901	THSD1	-0.215448	0.00910755	0.104022
23518	R3HDM1	-0.220641	0.00912029	0.104022
1176	AP3S1	-0.325464	0.00911878	0.104022
23316	CUX2	-0.287881	0.00911349	0.104022
81706	PPP1R14C	-0.388818	0.00915959	0.104328
100506487	LOC100506487	0.289538	0.00915416	0.104328
158	ADSL	-0.145648	0.00916776	0.10435
7586	ZKSCAN1	0.211336	0.00920095	0.104656
10141	C4orf6	-0.211296	0.0092247	0.10475
7260	TSSC1	-0.222539	0.00921919	0.10475
96459	FNIP1	0.238685	0.00922806	0.10475
388588	LOC388588	0.217942	0.00925052	0.104934
51312	SLC25A37	0.266769	0.00927767	0.105131
27324	TOX3	-0.282498	0.00928051	0.105131
57801	HES4	-0.156971	0.00929322	0.105203
23242	COBL	0.204801	0.00931667	0.105397
4129	MAOB	0.224092	0.00938999	0.105531
84236	RHBDD1	0.20267	0.00939482	0.105531
5913	RAPSN	-0.143133	0.0093903	0.105531
23731	C9orf5	0.269493	0.00934448	0.105531
1462	VCAN	0.289369	0.00937071	0.105531
5798	PTPRN	-0.259315	0.00937462	0.105531
57102	C12orf4	-0.218344	0.00939816	0.105531
56941	C3orf37	0.222579	0.0093361	0.105531
28985	MCTS1	-0.216556	0.00936708	0.105531
1352	COX10	-0.190807	0.00938366	0.105531
22832	KIAA1009	0.228869	0.00938607	0.105531
79993	ELOVL7	0.43834	0.00946085	0.10592
4958	OMD	0.435994	0.00945976	0.10592
8568	RRP1	0.187352	0.00946044	0.10592
1944	EFNA3	-0.179792	0.00946449	0.10592
9828	ARHGEF17	0.207781	0.00945629	0.10592
6124	RPL4	0.149583	0.00948451	0.105937
54857	GDPD2	0.464205	0.00949148	0.105937
23371	TENC1	0.131502	0.00949045	0.105937
388324	INCA1	-0.206842	0.00947406	0.105937
340419	RSPO2	0.413802	0.00950887	0.10606
55090	MED9	0.238318	0.00954359	0.106377
388610	TRNP1	0.310908	0.00955121	0.10639
6125	RPL5	0.167832	0.00958663	0.106714
57449	PLEKHG5	-0.193019	0.00960413	0.106763
7170	TPM3	-0.108993	0.00962309	0.106763
51616	TAF9B	0.24554	0.00962309	0.106763
131096	KCNH8	0.584382	0.00961121	0.106763
6183	MRPS12	-0.189694	0.00961317	0.106763
55515	ACCN4	-0.175642	0.00965245	0.106978
5936	RBM4	-0.234251	0.00965533	0.106978
5585	PKN1	0.314996	0.00966428	0.107007
64388	GREM2	-0.319252	0.00968947	0.107143
55304	SPTLC3	-0.259478	0.00968338	0.107143
5586	PKN2	0.307652	0.00969648	0.10715
8878	SQSTM1	0.107562	0.00973264	0.107478
146330	FBXL16	-0.256616	0.00976266	0.107731
26820	SNORD24	-0.271447	0.00976851	0.107731
404734	ANKHD1-EIF4EBP3	0.109472	0.00977963	0.107783
115584	SLC5A11	0.611614	0.00981694	0.108122
283571	PROX2	-0.48814	0.00983785	0.108281
338645	LUZP2	-0.312642	0.00985946	0.108314
55766	H2AFJ	0.229521	0.00985759	0.108314
1397	CRIP2	-0.167106	0.0098603	0.108314
9692	KIAA0391	0.141854	0.00988616	0.108526
57038	RARS2	-0.283357	0.00989479	0.10855
100033818	SNORD115-44	0.464414	0.00990183	0.108556
100526740	ATP5J2-PTCD1	-0.169984	0.00991585	0.108638
57568	SIPA1L2	-0.205969	0.00996969	0.109156
203076	C8orf74	-0.114055	0.00998885	0.109294
92359	CRB3	-0.147501	0.00999551	0.109295
1404	HAPLN1	-0.409474	0.0100425	0.109593
9051	PSTPIP1	0.162141	0.0100398	0.109593
5125	PCSK5	-0.24111	0.0100328	0.109593
1389	CREBL2	0.190684	0.0100529	0.109636
93377	OPALIN	0.593667	0.0100676	0.109724
139411	PTCHD1	-0.220998	0.0101236	0.110252
124056	NOXO1	-0.148726	0.0101293	0.110252
221491	C6orf1	-0.183915	0.0101741	0.110667
91801	ALKBH8	0.281834	0.010207	0.110953
25950	RWDD3	0.259175	0.0102157	0.110975
54602	NDFIP2	-0.300153	0.0102263	0.111018
4154	MBNL1	0.1235	0.0102606	0.111245
8550	MAPKAPK5	-0.216666	0.0102562	0.111245
115548	FCHO2	0.275489	0.0103085	0.111692
130162	C2orf63	0.1988	0.0103422	0.111966
22802	CLCA4	0.559166	0.0103472	0.111966
1961	EGR4	-0.4254	0.0103549	0.111977
6197	RPS6KA3	-0.42535	0.0104099	0.112498
89846	FGD3	-0.206557	0.0104182	0.112515
127254	C1orf173	0.329204	0.0104389	0.11252
284254	C18orf26	-0.313804	0.0104351	0.11252
286437	LOC286437	0.222227	0.0104342	0.11252
4053	LTBP2	0.210373	0.0104718	0.112802
3763	KCNJ6	-0.450312	0.0104918	0.112945
221443	C6orf130	0.145259	0.0105129	0.113099
100033460	SNORD115-20	0.444298	0.0105396	0.113152
201254	STRA13	-0.175043	0.0105347	0.113152
5634	PRPS2	-0.349793	0.010545	0.113152
26353	HSPB8	0.223235	0.0105439	0.113152
50717	DCAF8	0.193646	0.0105605	0.113245
10600	USP16	0.239762	0.0106369	0.113901
246213	SLC17A8	-0.329535	0.0106421	0.113901
1108	CHD4	0.183505	0.0106332	0.113901
283638	KIAA0284	-0.264284	0.010668	0.113958
84253	GARNL3	-0.204544	0.0106663	0.113958
9258	MFHAS1	0.245457	0.0106568	0.113958
8525	DGKZ	-0.108134	0.0106909	0.114061
54103	PION	0.347529	0.0106913	0.114061
90362	FAM110B	-0.227321	0.0107453	0.114193
666	BOK	0.44138	0.0107396	0.114193
4528	MTIF2	0.192213	0.0107427	0.114193
643836	ZFP62	0.195054	0.0107344	0.114193
57626	KLHL1	-0.205255	0.0107191	0.114193
9389	SLC22A14	0.240527	0.010739	0.114193
56731	SLC2A4RG	0.263562	0.0107516	0.114193
6147	RPL23A	0.115604	0.0107887	0.114515
9191	DEDD	-0.145396	0.0108242	0.114765
26468	LHX6	-0.131873	0.010831	0.114765
4711	NDUFB5	-0.222399	0.010833	0.114765
3671	ISLR	0.209311	0.0108419	0.114786
284418	FAM71E2	-0.150533	0.0108594	0.114899
23048	FNBP1	0.292083	0.0108753	0.114899
201931	TMEM192	0.241562	0.01088	0.114899
8483	CILP	0.34835	0.0108781	0.114899
57097	PARP11	-0.191939	0.0109471	0.115451
11234	HPS5	0.242834	0.0109454	0.115451
9746	CLSTN3	-0.2622	0.0109601	0.115451
30845	EHD3	0.310279	0.0109533	0.115451
54874	FNBP1L	-0.201315	0.0109943	0.115739
5654	HTRA1	0.259298	0.011003	0.115757
7182	NR2C2	0.185931	0.0110139	0.115799
122651	RNASE11	0.155668	0.0110517	0.116123
116225	ZMYND19	-0.134771	0.0110776	0.116175
57122	NUP107	0.216351	0.0110773	0.116175
11142	PKIG	-0.157458	0.0110708	0.116175
6390	SDHB	-0.192574	0.01111	0.116442
57575	PCDH10	-0.198636	0.0111437	0.116722
761	CA3	0.284711	0.011185	0.117081
221002	RASGEF1A	-0.215258	0.0112237	0.117306
4861	NPAS1	-0.220562	0.0112276	0.117306
1909	EDNRA	-0.295437	0.0112234	0.117306
120526	DNAJC24	-0.140468	0.0112482	0.117448
27258	LSM3	-0.158067	0.0112617	0.117515
4172	MCM3	0.225517	0.0112815	0.117641
57659	ZBTB4	0.220478	0.0112879	0.117641
10949	HNRNPA0	-0.196365	0.0113498	0.118213
5193	PEX12	0.170183	0.0114323	0.118997
11145	PLA2G16	0.409428	0.0114478	0.119084
414	ARSD	-0.113305	0.0114633	0.119097
7746	ZNF193	0.248559	0.0114614	0.119097
375612	LHFPL3	-0.169303	0.0114983	0.119386
780	DDR1	0.224751	0.0115258	0.119387
6769	STAC	-0.347512	0.011543	0.119387
7690	ZNF131	-0.163005	0.0115351	0.119387
4499	MT1M	0.47247	0.0115388	0.119387
11061	LECT1	0.220616	0.0115485	0.119387
51375	SNX7	-0.137002	0.0115244	0.119387
1421	CRYGD	-0.208463	0.0115301	0.119387
81628	TSC22D4	0.340459	0.0115643	0.119402
3306	HSPA2	0.611943	0.0115624	0.119402
126074	SWSAP1	-0.175756	0.0115971	0.119445
4142	MAS1	-0.307383	0.0115847	0.119445
4303	FOXO4	0.251194	0.0115907	0.119445
442720	EIF3IP1	-0.19974	0.0115942	0.119445
9223	MAGI1	-0.185902	0.0116146	0.119551
84897	TBRG1	-0.183586	0.0116219	0.119553
116840	CNTROB	-0.236788	0.0116353	0.119617
8715	NOL4	-0.370342	0.0116591	0.119787
27246	RNF115	0.225999	0.0117123	0.12026
84467	FBN3	-0.303479	0.0117252	0.120318
55063	ZCWPW1	0.179877	0.0117363	0.120355
1178	CLC	0.262167	0.0117432	0.120355
27019	DNAI1	0.179871	0.0117596	0.120375
79369	B3GNT4	-0.168506	0.0117575	0.120375
26225	ARL5A	-0.224303	0.0117689	0.120397
84314	TMEM107	0.251784	0.0117889	0.120527
80144	FRAS1	-0.0695742	0.0117995	0.120561
23398	PPWD1	0.223743	0.0118138	0.120634
57604	KIAA1456	-0.18969	0.0118554	0.120911
114818	KLHL29	-0.290552	0.0118494	0.120911
987	LRBA	0.164205	0.0118754	0.12104
219855	SLC37A2	-0.158662	0.0118875	0.12109
4204	MECP2	0.240054	0.0119232	0.121305
5147	PDE6D	-0.168835	0.0119166	0.121305
55071	C9orf40	-0.245079	0.0119429	0.121431
9110	MTMR4	0.142938	0.0119811	0.121746
10381	TUBB3	-0.291622	0.012006	0.121916
11040	PIM2	-0.235482	0.0120125	0.121916
8260	NAA10	-0.149188	0.0120218	0.121936
28955	DEXI	0.172011	0.0120343	0.121989
1852	DUSP9	0.349023	0.0120729	0.122157
64218	SEMA4A	-0.258116	0.0120606	0.122157
8301	PICALM	0.274273	0.0120688	0.122157
4601	MXI1	0.177607	0.0121121	0.122312
6341	SCO1	-0.241452	0.0121175	0.122312
51052	PRLH	-0.208989	0.0121083	0.122312
1381	CRABP1	-0.257774	0.0121125	0.122312
81696	OR5V1	-0.227165	0.0121735	0.122729
220359	TIGD3	0.213352	0.0121725	0.122729
26792	SNORD57	0.284973	0.0122056	0.122977
65250	C5orf42	0.231538	0.0122144	0.122993
7077	TIMP2	0.254345	0.0122285	0.12306
1312	COMT	-0.16232	0.0122798	0.123501
26102	DKFZP434A062	0.200657	0.0123558	0.123611
284293	HMSD	0.610507	0.0123574	0.123611
124637	CYB5D1	0.209974	0.0123243	0.123611
11096	ADAMTS5	-0.252749	0.0122997	0.123611
5638	PRRG1	0.393588	0.0123491	0.123611
7407	VARS	0.16256	0.0123242	0.123611
6645	SNTB2	-0.197554	0.0123522	0.123611
340206	TREML3	-0.179005	0.0123194	0.123611
23207	PLEKHM2	0.238729	0.0123345	0.123611
10907	TXNL4A	-0.20513	0.0123935	0.123824
5502	PPP1R1A	-0.219059	0.0123921	0.123824
375057	C1orf95	-0.280766	0.0124103	0.123843
54454	ATAD2B	0.262835	0.0124086	0.123843
10103	TSPAN1	0.123459	0.0124527	0.124117
9537	TP53I11	-0.291453	0.0124489	0.124117
4760	NEUROD1	0.292268	0.0125157	0.124671
158399	ZNF483	0.188724	0.0125377	0.124815
84105	PCBD2	0.239735	0.0125501	0.124864
133690	CAPSL	-0.412769	0.0126559	0.125842
533	ATP6V0B	-0.204961	0.0127032	0.126237
135932	TMEM139	0.300371	0.0127194	0.126323
81620	CDT1	-0.23198	0.0127342	0.126395
83440	ADPGK	0.183917	0.0127446	0.126422
55858	TMEM165	0.311383	0.0127575	0.126475
169714	QSOX2	0.211911	0.0127758	0.126581
22870	PPP6R1	-0.219829	0.0128016	0.126762
158405	KIAA1958	0.316891	0.0128571	0.126887
253260	RICTOR	0.331297	0.0128324	0.126887
8804	CREG1	-0.213209	0.0128599	0.126887
84889	SLC7A3	0.159654	0.012857	0.126887
85457	KIAA1737	0.201398	0.0128367	0.126887
9540	TP53I3	-0.133616	0.0128494	0.126887
10495	ENOX2	0.131456	0.0128783	0.126954
11248	NXPH3	-0.22634	0.0128965	0.126954
27145	FILIP1	-0.366137	0.0128971	0.126954
118432	RPL29P2	-0.192467	0.0128866	0.126954
84684	INSM2	0.375903	0.0129325	0.127152
256435	ST6GALNAC3	0.26963	0.0129309	0.127152
389493	LOC389493	-0.32704	0.0129492	0.127241
904	CCNT1	0.136304	0.0129664	0.127335
27343	POLL	0.149402	0.0129836	0.127429
115209	OMA1	0.261423	0.0130116	0.127628
54629	FAM63B	0.199582	0.0130205	0.127641
81553	FAM49A	-0.183736	0.013055	0.127879
80303	EFHD1	0.434563	0.0130602	0.127879
57590	WDFY1	0.18645	0.0130904	0.128016
155051	CRYGN	-0.242146	0.0131118	0.128016
57134	MAN1C1	0.219201	0.0131147	0.128016
37	ACADVL	0.215744	0.0131202	0.128016
91319	DERL3	-0.148865	0.0130993	0.128016
100506243	KRBOX1	-0.405469	0.013082	0.128016
6846	XCL2	-0.233441	0.0131373	0.128108
4160	MC4R	0.366979	0.0131454	0.128112
88455	ANKRD13A	0.324746	0.0131556	0.128137
10842	PPP1R17	-0.392851	0.0131688	0.12819
4026	LPP	0.327993	0.0131978	0.128397
390142	OR5D13	-0.186561	0.0132162	0.128501
4188	MDFI	-0.28486	0.0132362	0.128621
5046	PCSK6	0.576244	0.0132981	0.128717
94104	GCFC1	0.200863	0.0132985	0.128717
154807	VKORC1L1	-0.215817	0.0132691	0.128717
79690	GAL3ST4	-0.406758	0.0132561	0.128717
8577	TMEFF1	-0.286219	0.013284	0.128717
9586	CREB5	0.413715	0.01328	0.128717
220382	FAM181B	0.342383	0.0133001	0.128717
347168	OR1J1	-0.197772	0.013338	0.128934
22953	P2RX2	-0.159564	0.013335	0.128934
8605	PLA2G4C	0.300721	0.0133602	0.129074
195828	ZNF367	0.346848	0.013388	0.129267
9452	ITM2A	0.3223	0.0134034	0.129341
10961	ERP29	-0.17962	0.0134274	0.129498
51367	POP5	0.163167	0.0134517	0.129657
25858	C11orf20	-0.253955	0.0135065	0.129773
64798	DEPTOR	0.2814	0.0134822	0.129773
1778	DYNC1H1	0.280279	0.0134996	0.129773
134957	STXBP5	-0.312253	0.0135104	0.129773
64399	HHIP	0.565845	0.0134848	0.129773
4709	NDUFB3	-0.196635	0.0135049	0.129773
64901	RANBP17	-0.233545	0.013551	0.129785
1022	CDK7	-0.273282	0.0135584	0.129785
730130	TMEM229A	0.289267	0.01355	0.129785
4052	LTBP1	0.085474	0.0135214	0.129785
5713	PSMD7	-0.2294	0.0135282	0.129785
4521	NUDT1	-0.211955	0.0135511	0.129785
253982	ASPHD1	-0.225856	0.0135903	0.129792
10311	DSCR3	-0.157312	0.0135898	0.129792
23082	PPRC1	0.183225	0.013577	0.129792
9765	ZFYVE16	0.363901	0.013589	0.129792
6000	RGS7	-0.362967	0.0136377	0.129948
55652	SLC48A1	0.260089	0.0136197	0.129948
119692	OR51S1	0.152042	0.0136306	0.129948
56940	DUSP22	0.154034	0.0136249	0.129948
5533	PPP3CC	-0.17109	0.0137111	0.130452
387640	C10orf140	-0.165079	0.0137219	0.130452
283491	OR7E156P	-0.157383	0.0137065	0.130452
4929	NR4A2	-0.463065	0.0137153	0.130452
6659	SOX4	-0.210208	0.0137664	0.130801
6048	RNF5	-0.13308	0.0137834	0.130887
10628	TXNIP	0.507044	0.0138106	0.131071
55827	DCAF6	-0.181584	0.0138242	0.131126
23129	PLXND1	-0.261982	0.0139324	0.132077
89848	FCHSD1	0.132138	0.0140106	0.132668
23132	RAD54L2	0.31398	0.0140082	0.132668
80213	TM2D3	-0.27238	0.0140494	0.132745
839	CASP6	0.224733	0.0140825	0.132745
2672	GFI1	-0.243018	0.0140764	0.132745
132	ADK	-0.150446	0.0140296	0.132745
140902	R3HDML	-0.250135	0.0140792	0.132745
26035	GLCE	-0.232275	0.0140714	0.132745
201965	RWDD4	0.15568	0.0140766	0.132745
583	BBS2	0.201529	0.014063	0.132745
55969	C20orf24	-0.181687	0.0141006	0.13284
5515	PPP2CA	-0.207854	0.0141189	0.132938
140456	ASB11	-0.213305	0.014188	0.133438
84807	NFKBID	-0.171809	0.0141839	0.133438
79649	MAP7D3	0.189468	0.0142187	0.133503
55364	IMPACT	0.231314	0.0142153	0.133503
2553	GABPB1	-0.122774	0.0142189	0.133503
22992	KDM2A	0.201186	0.0143334	0.134486
100499483	C9orf174	0.239573	0.0143398	0.134486
51569	UFM1	-0.673168	0.014355	0.134553
84293	C10orf58	0.204375	0.0144467	0.134742
140849	LINC00266-1	0.384518	0.0144061	0.134742
100652766	LOC100652766	0.230855	0.0144228	0.134742
27229	TUBGCP4	-0.275831	0.0144303	0.134742
50831	TAS2R3	-0.176015	0.0144478	0.134742
58480	RHOU	0.513975	0.0144419	0.134742
140732	SUN5	-0.128243	0.0144071	0.134742
9114	ATP6V0D1	-0.316935	0.0143988	0.134742
7915	ALDH5A1	0.224221	0.014409	0.134742
158234	RG9MTD3	0.205263	0.0145048	0.135046
80179	MYO19	0.255929	0.0145027	0.135046
388762	OR2M1P	-0.263178	0.0144899	0.135046
130589	GALM	0.243658	0.0145232	0.135057
9738	CCP110	0.273527	0.0145169	0.135057
148327	CREB3L4	0.227108	0.0145302	0.135057
11190	CEP250	0.209008	0.0145533	0.135195
3992	FADS1	0.311433	0.0145731	0.135304
441061	2019-03-11	-0.239183	0.01462	0.135363
153572	IRX2	-0.289369	0.0146055	0.135363
7743	ZNF189	0.148723	0.0146061	0.135363
84312	BRMS1L	-0.250715	0.0145935	0.135363
84765	ZNF577	0.185412	0.0146142	0.135363
406896	MIR103A2	-0.33859	0.0146608	0.135367
25949	SYF2	0.161167	0.0146514	0.135367
64881	PCDH20	-0.45106	0.0146601	0.135367
83483	PLVAP	-0.165084	0.014661	0.135367
92344	GORAB	0.166995	0.0146369	0.135367
100131289	LOC100131289	-0.27333	0.0146915	0.135453
8418	CMAHP	0.166318	0.0146982	0.135453
10443	N4BP2L2	0.155934	0.0147029	0.135453
79913	ACTR5	0.160557	0.0146869	0.135453
152573	SHISA3	0.565521	0.0147379	0.135701
138639	PTPDC1	0.120878	0.0147634	0.135861
11214	AKAP13	0.316066	0.0147815	0.135952
1736	DKC1	0.143282	0.0147949	0.136
5775	PTPN4	-0.339949	0.0148653	0.136549
9817	KEAP1	0.113861	0.0148709	0.136549
29956	CERS2	0.369124	0.0149003	0.136686
23396	PIP5K1C	-0.196405	0.0149022	0.136686
5990	RFX2	0.336832	0.0149553	0.137097
55170	PRMT6	-0.225281	0.0149771	0.137222
158798	AKAP14	-0.270987	0.0150018	0.137297
57619	SHROOM3	-0.268869	0.014998	0.137297
114785	MBD6	0.241562	0.0150326	0.137431
246182	AKR7A2P1	0.170518	0.0150329	0.137431
8500	PPFIA1	0.178218	0.0150637	0.137487
282566	LINC00515	0.263039	0.0150493	0.137487
1310	COL19A1	-0.230254	0.0150568	0.137487
7917	BAG6	0.1512	0.0150826	0.137528
83547	RILP	0.227722	0.0150848	0.137528
51246	SHISA5	-0.165465	0.0151143	0.137572
7404	UTY	0.281336	0.0150989	0.137572
11247	NXPH4	-0.285822	0.015108	0.137572
79781	IQCA1	0.336421	0.0151526	0.137845
8826	IQGAP1	0.349073	0.0151844	0.137872
54823	SWT1	0.174636	0.0151707	0.137872
3159	HMGA1	-0.156428	0.0151856	0.137872
64101	LRRC4	-0.230482	0.0151887	0.137872
57705	WDFY4	-0.122672	0.015206	0.137932
26015	RPAP1	0.199079	0.0152119	0.137932
5168	ENPP2	0.413551	0.0152317	0.138037
60412	EXOC4	-0.167856	0.0152576	0.13815
5565	PRKAB2	0.196935	0.0152607	0.13815
93986	FOXP2	-0.269918	0.0152855	0.138299
23053	KIAA0913	0.197681	0.0152957	0.138316
133491	C5orf47	-0.323561	0.0153044	0.13832
154043	CNKSR3	0.42955	0.0153198	0.138334
23404	EXOSC2	0.16441	0.0153308	0.138334
222659	PXT1	-0.196337	0.0153228	0.138334
92691	TMEM169	-0.326725	0.0153528	0.138458
5364	PLXNB1	0.239753	0.0153708	0.13847
338657	CCDC84	0.181068	0.0153646	0.13847
55068	ENOX1	-0.207666	0.0153798	0.138476
9037	SEMA5A	-0.289369	0.0154232	0.138576
3991	LIPE	0.232078	0.0154248	0.138576
3816	KLK1	-0.283918	0.01542	0.138576
29099	COMMD9	-0.186718	0.0154178	0.138576
84070	FAM186B	-0.152005	0.0154324	0.138576
10162	LPCAT3	-0.186101	0.015452	0.138603
47	ACLY	0.173205	0.0154476	0.138603
7347	UCHL3	-0.23399	0.0154709	0.138698
55871	CBWD1	0.189537	0.015483	0.138732
26984	SEC22A	-0.185016	0.0155247	0.138969
56648	EIF5A2	0.396433	0.0155312	0.138969
3796	KIF2A	-0.249056	0.0155345	0.138969
25957	PNISR	0.204683	0.0155637	0.139081
53347	UBASH3A	-0.227788	0.0155586	0.139081
8445	DYRK2	-0.157619	0.0156647	0.139908
134549	SHROOM1	0.259465	0.0157575	0.140662
1889	ECE1	-0.123247	0.0157712	0.140708
5714	PSMD8	-0.210472	0.0158052	0.140936
10223	GPA33	-0.241069	0.0159002	0.141708
2885	GRB2	-0.155638	0.0159421	0.142006
389906	LOC389906	-0.327267	0.0159567	0.14206
1299	COL9A3	0.319473	0.0159685	0.142089
7045	TGFBI	-0.281952	0.0159788	0.142105
100033814	SNORD115-40	0.436704	0.0159901	0.14213
9695	EDEM1	0.275593	0.0160075	0.142153
65983	GRAMD3	0.378241	0.0160137	0.142153
3163	HMOX2	-0.182343	0.0160269	0.142153
3433	IFIT2	0.360232	0.0160216	0.142153
3854	KRT6B	-0.173995	0.0160358	0.142157
9169	SCAF11	0.224946	0.016048	0.142189
1908	EDN3	-0.356501	0.0161664	0.142286
54961	SSH3	0.111337	0.0161064	0.142286
390078	OR52E6	0.118261	0.0161783	0.142286
1393	CRHBP	-0.460049	0.0161536	0.142286
84549	MAK16	0.131231	0.016071	0.142286
93643	TJAP1	0.324224	0.0161371	0.142286
282890	ZNF311	-0.339975	0.0161416	0.142286
5612	PRKRIR	0.102161	0.0161625	0.142286
118738	ZNF488	0.224391	0.0161548	0.142286
84309	NUDT16L1	-0.1272	0.0161551	0.142286
23507	LRRC8B	-0.28195	0.0160956	0.142286
148304	C1orf74	-0.246616	0.0161726	0.142286
119	ADD2	-0.168012	0.0161706	0.142286
57060	PCBP4	0.18103	0.0160876	0.142286
29089	UBE2T	-0.241171	0.0161956	0.142298
138241	C9orf85	0.15999	0.0161968	0.142298
5423	POLB	-0.25398	0.0162162	0.142393
26234	FBXL5	0.22896	0.0163397	0.143402
4584	MUC3A	-0.119593	0.0164575	0.144284
201158	FAM18B2	0.243077	0.016451	0.144284
84942	WDR73	-0.177416	0.0165344	0.144882
22996	TTC39A	0.312297	0.0165449	0.144898
142679	DUSP19	-0.17418	0.0165641	0.144942
85027	C5orf62	0.277214	0.0165673	0.144942
2894	GRID1	0.204425	0.0165906	0.14497
55779	WDR52	0.258984	0.0165922	0.14497
221833	SP8	-0.199472	0.0165966	0.14497
53637	S1PR5	0.496987	0.0166167	0.14507
55614	KIF16B	0.215886	0.0166683	0.145444
4121	MAN1A1	-0.517659	0.0166919	0.145574
100130698	LOC100130698	-0.200583	0.0167389	0.145908
285286	LOC285286	0.326887	0.0167492	0.145921
4967	OGDH	0.228885	0.0167605	0.145944
27253	PCDH17	-0.263354	0.0167739	0.145983
6727	SRP14	0.191627	0.0168108	0.146203
124923	SGK494	0.201256	0.0168167	0.146203
286262	TPRN	0.224404	0.016835	0.146286
57595	PDZD4	-0.170256	0.0168787	0.14659
7067	THRA	0.1681	0.0169001	0.146699
23237	ARC	-0.484969	0.0169144	0.146747
2709	GJB5	-0.216376	0.0169244	0.146758
88745	RRP36	-0.149373	0.0169477	0.146883
51053	GMNN	0.269449	0.0169895	0.147115
57616	TSHZ3	-0.204771	0.0169921	0.147115
2035	EPB41	0.168227	0.0170679	0.147635
1345	COX6C	-0.0962435	0.0170699	0.147635
339453	TMEM240	-0.178385	0.0170896	0.147729
55227	LRRC1	0.318501	0.0171067	0.147731
349114	LINC00265	0.161093	0.0171076	0.147731
285401	LOC285401	-0.128439	0.0171603	0.148099
57528	KCTD16	-0.229833	0.017168	0.148099
963	CD53	0.432459	0.0172473	0.148184
5911	RAP2A	0.170214	0.0172394	0.148184
51540	SCLY	-0.090851	0.0172242	0.148184
23225	NUP210	0.223911	0.0172054	0.148184
118491	TTC18	0.281862	0.0172141	0.148184
118424	UBE2J2	-0.0984515	0.0172189	0.148184
9369	NRXN3	-0.134908	0.0172505	0.148184
84320	ACBD6	-0.225681	0.0172019	0.148184
79080	CCDC86	-0.137197	0.0172577	0.148184
284454	LOC284454	-0.279857	0.0172879	0.148267
286186	LOC286186	0.401446	0.0172941	0.148267
11118	BTN3A2	0.36005	0.0172841	0.148267
84628	NTNG2	-0.247479	0.0173038	0.148274
5026	P2RX5	-0.216633	0.0173313	0.148279
55253	TYW1	0.228518	0.0173422	0.148279
81669	CCNL2	0.219167	0.0173327	0.148279
440584	FLJ32224	0.256607	0.0173412	0.148279
100287728	LOC100287728	-0.162577	0.0173489	0.148279
118487	CHCHD1	-0.139968	0.0173693	0.148377
9678	PHF14	-0.206693	0.0173869	0.148452
60313	GPBP1L1	0.141993	0.0174006	0.148493
81697	OR2B2	-0.197561	0.0174131	0.148524
925	CD8A	-0.164228	0.0174322	0.148611
26223	FBXL21	-0.282487	0.0174669	0.14883
1006	CDH8	-0.307171	0.0174925	0.148928
9881	TRANK1	0.29869	0.0174963	0.148928
5387	PMS2P3	-0.215539	0.0175318	0.149154
9587	MAD2L1BP	-0.188604	0.0175522	0.149252
4128	MAOA	0.303825	0.0175807	0.149342
9361	LONP1	0.207185	0.0175773	0.149342
122773	KLHDC1	0.254411	0.0176053	0.149399
4056	LTC4S	-0.299677	0.0175996	0.149399
4645	MYO5B	-0.179373	0.0176316	0.1494
54431	DNAJC10	0.157888	0.0176323	0.1494
54407	SLC38A2	0.176935	0.0176167	0.1494
53616	ADAM22	-0.156886	0.0176528	0.149498
23708	GSPT2	-0.149081	0.0176892	0.149654
115024	NT5C3L	-0.20803	0.0176855	0.149654
2589	GALNT1	-0.19749	0.0177028	0.149692
9813	KIAA0494	0.219897	0.0178451	0.150819
10618	TGOLN2	0.10895	0.0178648	0.15091
51602	NOP58	0.143828	0.0178905	0.151051
8763	CD164	0.218239	0.0179223	0.151166
6445	SGCG	-0.288134	0.0179162	0.151166
644538	CXorf69	0.216388	0.0179318	0.151169
51742	ARID4B	0.316499	0.0179627	0.151353
80205	CHD9	0.207291	0.0179733	0.151366
54536	EXOC6	-0.26269	0.0180132	0.151626
8073	PTP4A2	0.218326	0.0180327	0.151713
51060	TXNDC12	0.171521	0.0180557	0.151753
201456	FBXO15	0.164133	0.0180487	0.151753
79084	WDR77	-0.172111	0.0181043	0.152002
57178	ZMIZ1	-0.15185	0.0181051	0.152002
92291	CAPN13	0.231435	0.0181218	0.152002
26774	SNORD80	-0.247478	0.0181133	0.152002
6599	SMARCC1	0.220547	0.0181591	0.152163
60487	TRMT11	0.165556	0.0181515	0.152163
285696	LOC285696	-0.273299	0.0181847	0.1523
9650	MTFR1	0.24306	0.0182249	0.152345
9266	CYTH2	-0.10693	0.0182069	0.152345
83937	RASSF4	0.197051	0.0182265	0.152345
93164	HTR7P1	-0.221278	0.018218	0.152345
8896	BUD31	-0.175828	0.0182547	0.152504
25787	DGCR9	-0.292714	0.0182641	0.152506
100272147	MTCP1NB	0.233207	0.0182847	0.152601
341880	SLC35F4	-0.269933	0.0183075	0.152715
[truncated: 14,676 more rows]

## Sheet: sva
Entrez_Gene_ID	Gene_Symbol	beta1	p.value_beta1	p.value_beta1_fdr_adjusted
162494	RHBDL3	1.12203	2.75452e-22	4.59316e-18
2849	GPR26	-1.15396	1.42407e-21	1.18732e-17
57180	ACTR3B	-0.762042	1.69807e-20	9.43845e-17
57495	KIAA1239	-1.14013	9.72305e-20	4.0533e-16
150	ADRA2A	-0.906161	1.42934e-19	4.76684e-16
793	CALB1	-1.62996	5.30063e-19	1.47313e-15
10777	ARPP21	-0.385574	7.53406e-19	1.5065e-15
57569	ARHGAP20	-0.847175	8.13102e-19	1.5065e-15
9890	LPPR4	-0.973547	6.48567e-19	1.5065e-15
84259	DCUN1D5	-0.542987	1.38937e-18	2.31677e-15
10678	B3GNT2	-0.628532	2.30466e-18	3.49365e-15
10439	OLFM1	-0.440231	8.58443e-18	1.19288e-14
84894	LINGO1	-0.718309	1.62994e-17	2.09071e-14
2289	FKBP5	1.0811	2.24838e-17	2.67798e-14
22999	RIMS1	-0.426592	1.40227e-16	1.55885e-13
4968	OGG1	-0.331609	1.53007e-16	1.59462e-13
56934	CA10	-0.709364	5.92339e-16	5.81014e-13
6751	SSTR1	-1.01452	7.44693e-16	6.89875e-13
27439	CECR6	-0.551544	1.08038e-15	9.48172e-13
6376	CX3CL1	-0.764463	2.80352e-15	2.33743e-12
9456	HOMER1	-0.757687	3.11495e-15	2.47342e-12
652	BMP4	0.802496	4.839e-15	3.66774e-12
117248	GALNTL2	0.738764	5.13173e-15	3.7205e-12
10125	RASGRP1	-0.737145	8.94904e-15	6.21772e-12
163404	LPPR5	-0.499512	1.49075e-14	9.65866e-12
116443	GRIN3A	-0.863853	1.506e-14	9.65866e-12
203286	ANKS6	0.444598	1.65681e-14	1.02323e-11
339479	FAM5C	-0.665012	1.96132e-14	1.16804e-11
57144	PAK7	-0.686387	4.03452e-14	2.31985e-11
8153	RND2	0.569001	5.74835e-14	3.19513e-11
25907	TMEM158	-0.719511	6.53579e-14	3.40576e-11
23531	MMD	-0.782225	6.35782e-14	3.40576e-11
56138	PCDHA11	-0.400186	7.75228e-14	3.80204e-11
6744	SSFA2	0.564506	7.74458e-14	3.80204e-11
3755	KCNG1	-0.369752	8.50241e-14	4.05079e-11
4023	LPL	1.17371	1.07736e-13	4.99025e-11
27445	PCLO	-0.598708	1.28899e-13	5.80915e-11
55800	SCN3B	-0.659987	1.54805e-13	6.61893e-11
221895	JAZF1	-0.417535	1.529e-13	6.61893e-11
1525	CXADR	-0.609599	1.84578e-13	7.51891e-11
57168	ASPHD2	-0.521709	1.84873e-13	7.51891e-11
116328	C8orf34	-0.875553	2.22801e-13	8.84571e-11
2558	GABRA5	-0.62379	2.50574e-13	9.71703e-11
148423	C1orf52	-0.419847	3.16607e-13	1.19987e-10
5744	PTHLH	-0.595374	3.37569e-13	1.22464e-10
85236	HIST1H2BK	-0.489687	3.37832e-13	1.22464e-10
5368	PNOC	-0.894137	3.54343e-13	1.23097e-10
10092	ARPC5	-0.453247	3.47151e-13	1.23097e-10
146395	GSG1L	-0.64308	4.15995e-13	1.40563e-10
80818	ZNF436	-0.584425	4.21479e-13	1.40563e-10
59352	LGR6	-0.895496	5.16205e-13	1.68779e-10
25966	C2CD2	0.527426	6.06719e-13	1.94559e-10
120	ADD3	0.332727	6.35854e-13	2.00054e-10
170463	SSBP4	-0.407362	1.17708e-12	3.63477e-10
146177	VWA3A	0.534943	1.46764e-12	4.44962e-10
115827	RAB3C	-0.697255	1.62841e-12	4.84889e-10
246330	PELI3	0.501314	1.66319e-12	4.86556e-10
220164	DOK6	-0.69441	2.01997e-12	5.80741e-10
100526835	FPGT-TNNI3K	-0.703367	2.89258e-12	8.17521e-10
2742	GLRA2	-0.823008	3.40402e-12	9.46034e-10
3787	KCNS1	0.72806	3.74078e-12	1.02258e-09
55230	USP40	0.533497	4.22826e-12	1.1372e-09
814	CAMK4	-0.800625	4.65811e-12	1.23292e-09
5475	PPEF1	-0.869901	5.17968e-12	1.34955e-09
57722	IGDCC4	0.786854	5.45036e-12	1.39823e-09
55753	OGDHL	0.40054	6.15982e-12	1.55629e-09
11072	DUSP14	-0.51934	8.81351e-12	2.19351e-09
813	CALU	-0.35875	1.11498e-11	2.73416e-09
79683	ZDHHC14	-0.313356	1.19692e-11	2.89255e-09
27249	MMADHC	-0.327215	1.25936e-11	2.99998e-09
196383	RILPL2	-0.54039	1.49706e-11	3.51598e-09
6045	RNF2	-0.477032	1.5424e-11	3.53949e-09
2670	GFAP	0.809851	1.54952e-11	3.53949e-09
26059	ERC2	-0.460376	1.64561e-11	3.65875e-09
57574	2019-03-04	-0.670871	1.62652e-11	3.65875e-09
121256	TMEM132D	-0.570149	1.97016e-11	4.32268e-09
2118	ETV4	-1.02777	2.10124e-11	4.55041e-09
25822	DNAJB5	-0.583029	2.18535e-11	4.61274e-09
163175	LGI4	0.460424	2.17171e-11	4.61274e-09
23593	HEBP2	0.649524	2.33002e-11	4.73817e-09
3479	IGF1	-0.676266	2.30022e-11	4.73817e-09
79158	GNPTAB	-0.407435	2.30462e-11	4.73817e-09
79646	PANK3	-0.55707	2.50611e-11	5.03487e-09
148808	MFSD4	-0.509309	2.55235e-11	5.06673e-09
23344	ESYT1	0.521878	2.71634e-11	5.32882e-09
54602	NDFIP2	-0.41573	3.42022e-11	6.63165e-09
57554	LRRC7	-0.683107	3.82323e-11	7.32786e-09
8536	CAMK1	-0.445077	3.99633e-11	7.49381e-09
3707	ITPKB	0.41987	3.99969e-11	7.49381e-09
10491	CRTAP	0.31055	4.51881e-11	8.3046e-09
10874	NMU	-1.09529	4.53204e-11	8.3046e-09
6843	VAMP1	0.461063	5.01435e-11	9.08852e-09
51534	VTA1	-0.459197	5.15142e-11	9.23655e-09
151176	FAM132B	-0.370887	5.33128e-11	9.45734e-09
11222	MRPL3	-0.273347	5.70381e-11	1.00117e-08
51754	TMEM8B	-0.300207	5.89084e-11	1.01818e-08
3706	ITPKA	-0.512366	5.92287e-11	1.01818e-08
2996	GYPE	-0.441652	6.13462e-11	1.04382e-08
2897	GRIK1	-0.616976	6.50612e-11	1.0849e-08
9459	ARHGEF6	0.365821	6.49376e-11	1.0849e-08
3299	HSF4	0.504403	6.69637e-11	1.10556e-08
51760	SYT17	-0.62265	7.02034e-11	1.14769e-08
2913	GRM3	-0.511352	7.93884e-11	1.28524e-08
4306	NR3C2	0.390447	8.68963e-11	1.39326e-08
6866	TAC3	-0.805996	9.56247e-11	1.51861e-08
283588	LOC283588	0.717859	1.08752e-10	1.71079e-08
8715	NOL4	-0.459327	1.11639e-10	1.7398e-08
5634	PRPS2	-0.455924	1.13668e-10	1.75501e-08
151507	MSL3P1	-0.468356	1.17242e-10	1.79359e-08
358	AQP1	0.802117	1.3064e-10	1.98039e-08
5179	PENK	-1.17305	1.4178e-10	2.12989e-08
55914	ERBB2IP	0.351389	1.74337e-10	2.57262e-08
5579	PRKCB	-0.461601	1.7359e-10	2.57262e-08
29904	EEF2K	0.389627	1.81715e-10	2.65798e-08
349136	WDR86	-0.823623	2.03264e-10	2.94733e-08
51285	RASL12	0.672212	2.0682e-10	2.97304e-08
3763	KCNJ6	-0.581034	2.24345e-10	3.19739e-08
998	CDC42	-0.302898	2.30795e-10	3.23491e-08
8900	CCNA1	-0.548956	2.30857e-10	3.23491e-08
4299	AFF1	0.281176	2.40742e-10	3.31518e-08
307	ANXA4	0.585793	2.4255e-10	3.31518e-08
10541	ANP32B	0.678861	2.41233e-10	3.31518e-08
135398	C6orf141	-1.01308	2.64862e-10	3.59072e-08
6014	RIT2	-0.609603	2.73238e-10	3.645e-08
56884	FSTL5	-0.555887	2.72482e-10	3.645e-08
376267	RAB15	-0.421712	2.92816e-10	3.87517e-08
23769	FLRT1	-0.44776	2.96633e-10	3.89476e-08
830	CAPZA2	-0.432878	3.03254e-10	3.95059e-08
8831	SYNGAP1	-0.502069	3.25961e-10	4.21348e-08
10090	UST	-0.466433	3.54348e-10	4.54519e-08
784	CACNB3	-0.389534	3.76168e-10	4.76753e-08
9114	ATP6V0D1	-0.352867	3.774e-10	4.76753e-08
753	C18orf1	-0.471142	3.81858e-10	4.78758e-08
22948	CCT5	-0.396632	3.86422e-10	4.80865e-08
4878	NPPA	-1.11542	4.11082e-10	5.07763e-08
4330	MN1	-0.677919	4.1825e-10	5.12818e-08
2878	GPX3	0.502505	4.31863e-10	5.25644e-08
22884	WDR37	0.360517	4.70364e-10	5.68357e-08
3777	KCNK3	-0.298015	4.94767e-10	5.93543e-08
375196	LOC375196	-0.525831	5.24732e-10	6.21149e-08
103910	MYL12B	-0.275304	5.2523e-10	6.21149e-08
150568	LOC150568	-0.696273	5.87967e-10	6.90447e-08
22794	CASC3	0.326782	6.53087e-10	7.61554e-08
11000	SLC27A3	0.46791	6.67523e-10	7.72982e-08
1392	CRH	-1.05807	6.76641e-10	7.78137e-08
10368	CACNG3	-0.421145	6.89492e-10	7.87485e-08
79039	DDX54	-0.355764	7.39559e-10	8.38922e-08
387103	CENPW	-0.616696	7.56866e-10	8.52089e-08
491	ATP2B2	-0.354043	7.61387e-10	8.52089e-08
51324	SPG21	0.341658	8.04913e-10	8.92869e-08
91373	UAP1L1	0.441276	8.08535e-10	8.92869e-08
51517	NCKIPSD	0.450356	8.43965e-10	9.25863e-08
90673	PPP1R3E	0.343147	1.08065e-09	1.17776e-07
64333	ARHGAP9	0.509251	1.19136e-09	1.29e-07
80309	SPHKAP	-0.404833	1.24763e-09	1.34221e-07
9734	HDAC9	-0.445175	1.29551e-09	1.38478e-07
7991	TUSC3	-0.548494	1.37622e-09	1.46168e-07
4794	NFKBIE	-0.251418	1.43e-09	1.49396e-07
10633	RASL10A	-0.528621	1.43348e-09	1.49396e-07
2044	EPHA5	-0.762769	1.42488e-09	1.49396e-07
10769	PLK2	-0.502798	1.46831e-09	1.52075e-07
23504	RIMBP2	-0.343277	1.49981e-09	1.54379e-07
54886	LPPR1	-0.406046	1.55292e-09	1.58865e-07
23248	RPRD2	0.321462	1.63495e-09	1.66237e-07
9125	RQCD1	-0.319824	1.67819e-09	1.69599e-07
5801	PTPRR	-0.425937	1.72019e-09	1.72796e-07
134957	STXBP5	-0.3769	1.76834e-09	1.75518e-07
6098	ROS1	1.00792	1.75834e-09	1.75518e-07
54221	SNTG2	0.681525	1.97196e-09	1.94571e-07
26575	RGS17	-0.468462	2.3937e-09	2.34794e-07
116135	LRRC3B	-0.50277	2.5654e-09	2.50164e-07
58	ACTA1	-0.276906	2.84412e-09	2.75731e-07
114801	TMEM200A	-0.75864	2.94895e-09	2.84241e-07
5156	PDGFRA	-0.743794	3.00417e-09	2.87899e-07
29994	BAZ2B	0.284999	3.06244e-09	2.90148e-07
8553	BHLHE40	0.598109	3.04575e-09	2.90148e-07
4650	MYO9B	0.310681	3.18369e-09	2.99932e-07
52	ACP1	-0.247363	3.2638e-09	3.05752e-07
100129460	DPY19L1P1	0.592457	3.35444e-09	3.12487e-07
8938	BAIAP3	0.563165	3.41096e-09	3.15988e-07
6543	SLC8A2	-0.472679	3.46901e-09	3.1959e-07
8165	AKAP1	0.343612	3.84383e-09	3.52175e-07
10573	MRPL28	-0.359942	4.02566e-09	3.66819e-07
59345	GNB4	-0.470211	4.05505e-09	3.67489e-07
54930	HAUS4	0.319006	4.16656e-09	3.75553e-07
2823	GPM6A	-0.380174	4.34265e-09	3.87239e-07
23507	LRRC8B	-0.423532	4.34155e-09	3.87239e-07
6775	STAT4	0.555797	4.41229e-09	3.91356e-07
93099	DMKN	0.397803	4.50996e-09	3.97902e-07
55531	ELMOD1	-0.370691	4.63631e-09	4.06898e-07
51667	NUB1	0.357574	4.74597e-09	4.13349e-07
728485	LOC728485	-0.604882	4.76041e-09	4.13349e-07
3608	ILF2	-0.277154	4.78419e-09	4.13349e-07
64881	PCDH20	-0.690121	4.96436e-09	4.26704e-07
83445	GSG1	-0.4535	5.13948e-09	4.39492e-07
9308	CD83	0.510544	5.26594e-09	4.48008e-07
57452	GALNTL1	0.358792	5.3296e-09	4.51122e-07
590	BCHE	-0.58801	6.14669e-09	5.17657e-07
57464	FAM40B	-0.368214	6.2885e-09	5.21722e-07
89795	NAV3	-0.354292	6.28883e-09	5.21722e-07
3017	HIST1H2BD	-0.557239	6.25752e-09	5.21722e-07
129642	MBOAT2	-0.296426	6.56434e-09	5.41883e-07
100526739	APITD1-CORT	-0.391699	6.64477e-09	5.45821e-07
124446	TMEM219	0.367183	6.70949e-09	5.48407e-07
55585	UBE2Q1	-0.394459	6.74204e-09	5.48407e-07
160622	GRASP	-0.473298	6.9898e-09	5.65801e-07
23423	TMED3	-0.294132	7.2849e-09	5.86839e-07
23467	NPTXR	-0.490002	7.35389e-09	5.89549e-07
9315	C5orf13	-0.563014	8.02679e-09	6.40415e-07
54899	PXK	0.607996	8.29041e-09	6.58298e-07
3356	HTR2A	-0.437847	8.86832e-09	7.00849e-07
9811	CTIF	0.162122	8.92223e-09	7.01784e-07
9911	TMCC2	0.296812	9.46621e-09	7.41075e-07
3097	HIVEP2	-0.495981	9.65405e-09	7.4875e-07
166348	KBTBD12	0.426581	9.64397e-09	7.4875e-07
56254	RNF20	0.290271	1.0731e-08	8.28426e-07
4067	LYN	-0.525292	1.10631e-08	8.50127e-07
253558	LCLAT1	-0.350548	1.14614e-08	8.76692e-07
9389	SLC22A14	0.375028	1.20872e-08	9.16158e-07
5091	PC	0.274166	1.20585e-08	9.16158e-07
10005	ACOT8	-0.325432	1.24983e-08	9.43028e-07
3691	ITGB4	0.397696	1.26731e-08	9.5191e-07
550643	LOC550643	-0.361328	1.27849e-08	9.56004e-07
26092	TOR1AIP1	0.318575	1.38974e-08	1.03455e-06
1178	CLC	0.372682	1.40242e-08	1.03935e-06
6804	STX1A	-0.351814	1.41177e-08	1.04165e-06
6715	SRD5A1	-0.444197	1.43211e-08	1.052e-06
7431	VIM	0.505219	1.43844e-08	1.05202e-06
55022	PID1	-0.441058	1.49704e-08	1.0901e-06
25874	BRP44	-0.243797	1.54586e-08	1.12075e-06
9249	DHRS3	0.484535	1.67273e-08	1.20748e-06
80758	PRR7	-0.353961	1.7028e-08	1.22389e-06
11279	KLF8	-0.356508	1.71409e-08	1.22671e-06
9362	CPNE6	-0.554632	1.75401e-08	1.24992e-06
7508	XPC	0.353258	1.78822e-08	1.26887e-06
92	ACVR2A	-0.282237	1.83194e-08	1.287e-06
1009	CDH11	-0.449017	1.83691e-08	1.287e-06
7139	TNNT2	0.529302	1.82719e-08	1.287e-06
91754	NEK9	0.344933	2.02712e-08	1.41432e-06
2840	GPR17	-0.787699	2.08999e-08	1.45211e-06
5920	RARRES3	0.534915	2.16014e-08	1.49462e-06
10950	BTG3	-0.469181	2.26913e-08	1.56355e-06
27012	KCNV1	-0.528643	2.2896e-08	1.57116e-06
10233	LRRC23	0.263905	2.48488e-08	1.69817e-06
199223	TTC21A	0.427145	2.54075e-08	1.72927e-06
23101	MCF2L2	0.501435	2.56753e-08	1.74039e-06
131408	FAM131A	-0.375191	2.61724e-08	1.7669e-06
5714	PSMD8	-0.237058	2.67473e-08	1.79843e-06
7704	ZBTB16	0.563755	2.80156e-08	1.87614e-06
83891	SNX25	-0.446171	2.82598e-08	1.88493e-06
5332	PLCB4	-0.39176	2.93152e-08	1.9398e-06
257415	FAM133B	0.273906	2.92888e-08	1.9398e-06
57718	PPP4R4	-0.348266	3.00158e-08	1.97831e-06
11343	MGLL	-0.330641	3.27956e-08	2.15302e-06
1356	CP	1.2527	3.32932e-08	2.17711e-06
29116	MYLIP	-0.39314	3.34809e-08	2.18084e-06
7371	UCK2	-0.26647	3.57242e-08	2.3179e-06
23452	ANGPTL2	-0.456398	3.76956e-08	2.43634e-06
9866	TRIM66	0.359664	3.81386e-08	2.45545e-06
9252	RPS6KA5	0.312995	3.88365e-08	2.49077e-06
53838	C11orf24	-0.388438	3.90038e-08	2.49191e-06
338645	LUZP2	-0.502291	3.95451e-08	2.50638e-06
9211	LGI1	-0.288748	3.95901e-08	2.50638e-06
57633	LRRN1	-0.46916	3.96812e-08	2.50638e-06
254295	PHYHD1	0.576837	4.12416e-08	2.59511e-06
57467	HHATL	0.753154	4.15423e-08	2.6042e-06
29997	GLTSCR2	0.28989	4.2381e-08	2.64221e-06
64064	OXCT2	0.454486	4.26038e-08	2.64221e-06
389206	BEND4	-0.547486	4.26239e-08	2.64221e-06
5288	PIK3C2G	-0.688872	4.4249e-08	2.73278e-06
8804	CREG1	-0.306927	4.49872e-08	2.76812e-06
633	BGN	0.494217	4.51971e-08	2.77082e-06
128989	C22orf25	0.33294	4.57612e-08	2.79512e-06
91624	NEXN	0.678258	4.65351e-08	2.82172e-06
29952	DPP7	0.347039	4.64144e-08	2.82172e-06
284408	LOC284408	-0.458724	4.801e-08	2.9006e-06
5927	KDM5A	0.39535	4.83255e-08	2.90135e-06
8912	CACNA1H	-0.310132	4.83704e-08	2.90135e-06
5983	RFC3	-0.346346	4.9033e-08	2.93056e-06
4122	MAN2A2	0.338657	4.95232e-08	2.94929e-06
203522	DDX26B	0.359925	5.03983e-08	2.99072e-06
27327	TNRC6A	0.248531	5.10393e-08	3.01801e-06
8681	JMJD7-PLA2G4B	0.372956	5.56887e-08	3.2813e-06
23046	KIF21B	-0.382422	5.67279e-08	3.33077e-06
8803	SUCLA2	-0.354466	5.69911e-08	3.33448e-06
100506214	LOC100506214	0.326397	6.01184e-08	3.50515e-06
203069	R3HCC1	-0.257033	6.10038e-08	3.5403e-06
80816	ASXL3	-0.340456	6.11458e-08	3.5403e-06
55860	ACTR10	-0.283404	6.16719e-08	3.55841e-06
4820	NKTR	0.289625	6.22893e-08	3.58163e-06
57419	SLC24A3	-0.334092	6.29916e-08	3.60957e-06
5110	PCMT1	-0.313427	6.37221e-08	3.63892e-06
84966	IGSF21	-0.425102	6.48101e-08	3.68842e-06
27019	DNAI1	0.290879	6.53768e-08	3.69545e-06
57103	C12orf5	-0.557478	6.53311e-08	3.69545e-06
4215	MAP3K3	0.145646	6.8622e-08	3.83984e-06
114786	XKR4	-0.420434	6.85653e-08	3.83984e-06
5270	SERPINE2	-0.561719	6.84702e-08	3.83984e-06
90362	FAM110B	-0.290859	7.01276e-08	3.91096e-06
6324	SCN1B	0.376423	7.19635e-08	3.99997e-06
80010	RMI1	0.301417	7.28724e-08	4.03703e-06
79789	CLMN	0.375196	7.31972e-08	4.0416e-06
55140	ELP3	0.278534	7.55906e-08	4.15998e-06
26232	FBXO2	0.28238	7.65855e-08	4.20086e-06
406	ARNTL	-0.49597	7.73402e-08	4.22835e-06
126823	KLHDC9	0.285311	7.85954e-08	4.28294e-06
2067	ERCC1	-0.200102	7.90746e-08	4.29501e-06
79932	KIAA0319L	0.216666	8.2267e-08	4.4539e-06
55512	SMPD3	-0.318296	8.75123e-08	4.72255e-06
1116	CHI3L1	0.797165	8.78213e-08	4.72394e-06
3776	KCNK2	-0.431593	8.85652e-08	4.74863e-06
56938	ARNTL2	-0.45209	9.25528e-08	4.94653e-06
6197	RPS6KA3	-0.424976	9.30778e-08	4.9587e-06
51635	DHRS7	0.270869	1.00416e-07	5.33263e-06
1998	ELF2	0.21432	1.01546e-07	5.37549e-06
2115	ETV1	-0.379588	1.06601e-07	5.62521e-06
1008	CDH10	-0.327452	1.08048e-07	5.68359e-06
1497	CTNS	0.412995	1.09842e-07	5.75982e-06
23017	FAIM2	0.480775	1.10657e-07	5.78434e-06
5250	SLC25A3	-0.263967	1.11075e-07	5.78803e-06
85460	ZNF518B	-0.314183	1.14895e-07	5.96846e-06
286189	LOC286189	-0.600611	1.16259e-07	6.00191e-06
6277	S100A6	0.46339	1.16111e-07	6.00191e-06
55906	ZC4H2	-0.297527	1.19673e-07	6.1591e-06
6094	ROM1	0.455312	1.22166e-07	6.26804e-06
25959	KANK2	0.408137	1.24192e-07	6.33302e-06
146540	ZNF785	0.433252	1.24188e-07	6.33302e-06
3300	DNAJB2	0.271892	1.25887e-07	6.39991e-06
55071	C9orf40	-0.375073	1.2835e-07	6.46595e-06
255631	COL24A1	-0.833653	1.28168e-07	6.46595e-06
1960	EGR3	-0.631376	1.28023e-07	6.46595e-06
9142	CXorf1	-0.354579	1.2892e-07	6.47512e-06
84261	FBXW9	-0.290052	1.30155e-07	6.5175e-06
219654	ZCCHC24	0.466859	1.30952e-07	6.53779e-06
53335	BCL11A	-0.379877	1.34812e-07	6.7104e-06
91404	SESTD1	0.348366	1.36488e-07	6.76523e-06
56969	RPL23AP32	0.375291	1.36725e-07	6.76523e-06
1936	EEF1D	0.337848	1.39099e-07	6.86234e-06
8537	BCAS1	0.78791	1.40145e-07	6.89358e-06
5333	PLCD1	0.285038	1.44228e-07	7.07351e-06
51076	CUTC	0.232352	1.46527e-07	7.16523e-06
23241	PACS2	0.303052	1.47243e-07	7.1792e-06
2199	FBLN2	-0.436867	1.48328e-07	7.20705e-06
83608	C18orf21	-0.200597	1.48679e-07	7.20705e-06
100128071	LOC100128071	0.378596	1.52369e-07	7.36448e-06
6272	SORT1	0.365994	1.54883e-07	7.42146e-06
5595	MAPK3	0.368129	1.54675e-07	7.42146e-06
84327	ZBED3	0.389874	1.54488e-07	7.42146e-06
55170	PRMT6	-0.386308	1.61092e-07	7.69688e-06
54809	SAMD9	-0.561423	1.66235e-07	7.89734e-06
9806	SPOCK2	0.39137	1.66178e-07	7.89734e-06
54857	GDPD2	0.478324	1.69306e-07	8.02038e-06
5990	RFX2	0.447405	1.75989e-07	8.31336e-06
54793	KCTD9	0.322878	1.84339e-07	8.68319e-06
338758	LOC338758	-0.530078	1.87611e-07	8.81242e-06
5912	RAP2B	-0.313709	1.91801e-07	8.98395e-06
85443	DCLK3	-0.417473	1.93496e-07	9.03793e-06
23475	QPRT	0.414309	1.9641e-07	9.14845e-06
6535	SLC6A8	0.324352	1.9892e-07	9.21386e-06
1607	DGKB	-0.480594	1.98522e-07	9.21386e-06
7037	TFRC	-0.619556	2.01028e-07	9.26008e-06
221477	C6orf89	0.292001	2.00649e-07	9.26008e-06
5593	PRKG2	-0.645775	2.04217e-07	9.38104e-06
10497	UNC13B	-0.316885	2.05346e-07	9.40698e-06
56917	MEIS3	-0.214545	2.08613e-07	9.53046e-06
23500	DAAM2	0.480242	2.17937e-07	9.92924e-06
126231	ZNF573	0.346464	2.18635e-07	9.93388e-06
1022	CDK7	-0.295805	2.276e-07	1.03131e-05
429	ASCL1	0.366156	2.33025e-07	1.05303e-05
11080	DNAJB4	-0.425911	2.33731e-07	1.05337e-05
1047	CLGN	0.402627	2.45326e-07	1.10264e-05
9016	SLC25A14	-0.318206	2.53126e-07	1.13464e-05
1123	CHN1	-0.283835	2.57507e-07	1.15119e-05
7802	DNALI1	0.483549	2.61687e-07	1.16675e-05
3653	IPW	0.506034	2.62957e-07	1.16928e-05
3075	CFH	0.563425	2.63749e-07	1.16968e-05
25799	ZNF324	0.256517	2.72724e-07	1.20628e-05
230	ALDOC	0.376554	2.75484e-07	1.21411e-05
10669	CGREF1	-0.214821	2.75951e-07	1.21411e-05
28996	HIPK2	0.554422	2.83297e-07	1.24315e-05
81628	TSC22D4	0.349056	2.95928e-07	1.29517e-05
12	SERPINA3	1.07931	3.04083e-07	1.32526e-05
29982	NRBF2	-0.260663	3.04393e-07	1.32526e-05
114041	C21orf88	0.317422	3.08536e-07	1.33632e-05
2189	FANCG	0.315339	3.0807e-07	1.33632e-05
8408	ULK1	0.267289	3.10186e-07	1.33694e-05
896	CCND3	0.291506	3.10281e-07	1.33694e-05
23036	ZNF292	0.364392	3.13479e-07	1.34723e-05
5128	CDK17	-0.339481	3.14796e-07	1.34941e-05
5936	RBM4	-0.247019	3.16408e-07	1.35285e-05
1602	DACH1	-0.281036	3.26899e-07	1.3933e-05
344658	SAMD7	0.336219	3.2754e-07	1.3933e-05
10318	TNIP1	0.271666	3.2876e-07	1.39493e-05
9961	MVP	0.367156	3.30636e-07	1.39579e-05
10891	PPARGC1A	0.384624	3.30627e-07	1.39579e-05
79443	FYCO1	0.388767	3.32821e-07	1.40146e-05
10955	SERINC3	-0.312471	3.42766e-07	1.43971e-05
5394	EXOSC10	0.257106	3.45683e-07	1.44495e-05
2589	GALNT1	-0.339381	3.45747e-07	1.44495e-05
24139	EML2	0.333024	3.48754e-07	1.44978e-05
84312	BRMS1L	-0.328158	3.50381e-07	1.44978e-05
2644	GCHFR	0.307953	3.4823e-07	1.44978e-05
284348	LYPD5	0.459935	3.49652e-07	1.44978e-05
582	BBS1	0.318854	3.59266e-07	1.48286e-05
22997	IGSF9B	0.463748	3.62881e-07	1.49246e-05
572	BAD	-0.244269	3.63382e-07	1.49246e-05
200014	CC2D1B	0.255097	3.69421e-07	1.51354e-05
389023	LOC389023	-0.435927	3.71275e-07	1.51695e-05
26960	NBEA	-0.320092	3.72073e-07	1.51695e-05
26517	TIMM13	-0.306216	3.76726e-07	1.53211e-05
55816	DOK5	-0.314627	3.7763e-07	1.53211e-05
126731	C1orf96	-0.299134	3.82996e-07	1.55011e-05
10625	IVNS1ABP	-0.267785	3.87053e-07	1.56274e-05
27032	ATP2C1	-0.283833	4.04573e-07	1.62896e-05
283481	LOC283481	0.406561	4.05409e-07	1.62896e-05
79041	TMEM38A	-0.341744	4.10979e-07	1.63744e-05
9413	FAM189A2	0.515398	4.11849e-07	1.63744e-05
3208	HPCA	-0.475581	4.12429e-07	1.63744e-05
64326	RFWD2	-0.269901	4.09959e-07	1.63744e-05
5834	PYGB	0.430796	4.09563e-07	1.63744e-05
9547	CXCL14	-0.511468	4.37601e-07	1.7262e-05
5813	PURA	0.28275	4.36068e-07	1.7262e-05
146057	TTBK2	0.417144	4.38926e-07	1.7262e-05
8821	INPP4B	0.327184	4.38295e-07	1.7262e-05
4926	NUMA1	0.256952	4.41825e-07	1.73351e-05
80213	TM2D3	-0.281327	4.51103e-07	1.75434e-05
153222	C5orf41	0.320894	4.51225e-07	1.75434e-05
10102	TSFM	-0.302356	4.51341e-07	1.75434e-05
29922	NME7	-0.329234	4.49479e-07	1.75434e-05
5641	LGMN	-0.291026	4.52869e-07	1.75618e-05
79780	CCDC82	0.283692	4.55231e-07	1.76125e-05
64131	XYLT1	-0.429901	4.59593e-07	1.77401e-05
84747	UNC119B	0.359017	4.63253e-07	1.78401e-05
1875	E2F5	-0.394255	4.71358e-07	1.81104e-05
2280	FKBP1A	-0.333489	4.76585e-07	1.82691e-05
57565	KLHL14	-0.861018	4.78987e-07	1.8319e-05
7432	VIP	-0.66022	4.92148e-07	1.87365e-05
79073	TMEM109	0.291178	4.9172e-07	1.87365e-05
79623	GALNT14	-0.406639	4.98682e-07	1.8942e-05
3775	KCNK1	-0.386537	5.29732e-07	2.00448e-05
84937	ZNRF1	-0.265654	5.3012e-07	2.00448e-05
57644	MYH7B	0.431278	5.36639e-07	2.02104e-05
64388	GREM2	-0.424304	5.36923e-07	2.02104e-05
117154	DACH2	0.284167	5.47409e-07	2.05587e-05
1400	CRMP1	-0.469061	5.49069e-07	2.05747e-05
114569	MAL2	-0.529851	5.7066e-07	2.13044e-05
50632	CALY	0.287404	5.71099e-07	2.13044e-05
7466	WFS1	0.298929	5.73397e-07	2.13424e-05
80315	CPEB4	0.363361	5.75315e-07	2.13661e-05
4430	MYO1B	-0.354534	5.86711e-07	2.17409e-05
124842	TMEM132E	0.389679	6.10614e-07	2.25765e-05
339559	ZNF642	-0.437428	6.13405e-07	2.26295e-05
51735	RAPGEF6	0.283421	6.27446e-07	2.30455e-05
7158	TP53BP1	-0.405037	6.26685e-07	2.30455e-05
55367	PIDD	0.32664	6.50674e-07	2.37938e-05
353333	KRTAP10-10	0.318183	6.49496e-07	2.37938e-05
378706	RN7SL2	0.630969	6.53753e-07	2.38541e-05
81572	PDRG1	-0.265103	6.68539e-07	2.42345e-05
3426	CFI	0.673143	6.68069e-07	2.42345e-05
23315	SLC9A8	0.348459	6.67072e-07	2.42345e-05
23612	PHLDA3	0.287318	6.76836e-07	2.44821e-05
25758	C11orf41	-0.430069	6.8953e-07	2.48873e-05
60626	RIC8A	-0.242884	6.98381e-07	2.51523e-05
391634	HSP90AB2P	0.613532	7.07901e-07	2.54402e-05
79992	AGPAT4-IT1	0.539269	7.16008e-07	2.56762e-05
4162	MCAM	0.423182	7.31482e-07	2.61748e-05
55629	PNRC2	-0.293407	7.38054e-07	2.63534e-05
1793	DOCK1	0.479015	7.46318e-07	2.65916e-05
9229	DLGAP1	-0.262601	7.7771e-07	2.7651e-05
65110	UPF3A	0.346756	7.80475e-07	2.76903e-05
342035	GLDN	0.555954	7.8872e-07	2.79234e-05
57553	MICAL3	0.206413	7.9999e-07	2.82624e-05
80319	CXXC4	-0.34288	8.05527e-07	2.83978e-05
203102	ADAM32	0.362833	8.12893e-07	2.8597e-05
23433	RHOQ	0.294525	8.14779e-07	2.8603e-05
6563	SLC14A1	1.05517	8.31852e-07	2.90412e-05
80115	BAIAP2L2	0.247652	8.31477e-07	2.90412e-05
5833	PCYT2	0.178615	8.32485e-07	2.90412e-05
5515	PPP2CA	-0.288753	8.39404e-07	2.92214e-05
9717	SEC14L5	0.406413	8.44874e-07	2.93506e-05
399687	MYO18A	0.247066	8.58448e-07	2.97601e-05
54882	ANKHD1	0.232186	8.67811e-07	2.99703e-05
23258	DENND5A	0.297652	8.68105e-07	2.99703e-05
8437	RASAL1	-0.391539	8.73488e-07	3.00938e-05
10159	ATP6AP2	-0.313194	8.7933e-07	3.02327e-05
6738	TROVE2	0.23002	8.87031e-07	3.03722e-05
401442	LOC401442	-0.538953	8.86395e-07	3.03722e-05
55286	C4orf19	-0.582146	9.156e-07	3.12095e-05
23505	TMEM131	-0.20374	9.1548e-07	3.12095e-05
51320	MEX3C	-0.324196	9.171e-07	3.12095e-05
4712	NDUFB6	-0.241228	9.42411e-07	3.19404e-05
1592	CYP26A1	-0.338668	9.41829e-07	3.19404e-05
54662	TBC1D13	0.268043	9.64077e-07	3.2569e-05
25943	C20orf194	0.317859	9.64864e-07	3.2569e-05
199221	DZIP1L	0.568835	9.68681e-07	3.26318e-05
6773	STAT2	0.30111	9.78922e-07	3.29103e-05
8480	RAE1	-0.320437	9.987e-07	3.35077e-05
79000	C1orf135	-0.311231	1.03209e-06	3.45585e-05
64849	SLC13A3	0.400706	1.03849e-06	3.4703e-05
51761	ATP8A2	-0.22752	1.04115e-06	3.47223e-05
125	ADH1B	0.818168	1.04649e-06	3.47398e-05
84251	SGIP1	-0.224573	1.04792e-06	3.47398e-05
140901	STK35	0.307214	1.04721e-06	3.47398e-05
79017	GGCT	-0.289565	1.0597e-06	3.50605e-05
6578	SLCO2A1	-0.584525	1.09807e-06	3.62582e-05
54536	EXOC6	-0.357301	1.14374e-06	3.76915e-05
5372	PMM1	-0.224686	1.16287e-06	3.82463e-05
25903	OLFML2B	-0.594507	1.20137e-06	3.94347e-05
78990	OTUB2	-0.425818	1.22235e-06	4.00445e-05
282974	STK32C	-0.292757	1.23208e-06	4.02843e-05
10455	ECI2	0.263027	1.23973e-06	4.04549e-05
57799	RAB40C	-0.311752	1.24568e-06	4.05289e-05
7976	FZD3	-0.301674	1.24686e-06	4.05289e-05
80757	TMEM121	-0.309914	1.28601e-06	4.17203e-05
55706	TMEM48	-0.356168	1.29603e-06	4.19445e-05
51143	DYNC1LI1	-0.280308	1.29795e-06	4.19445e-05
9678	PHF14	-0.252348	1.30078e-06	4.19544e-05
402	ARL2	0.277246	1.31535e-06	4.2289e-05
84002	B3GNT5	-0.422374	1.31622e-06	4.2289e-05
51207	DUSP13	-0.79478	1.3206e-06	4.23482e-05
4090	SMAD5	0.290716	1.36865e-06	4.38048e-05
57102	C12orf4	-0.251968	1.37767e-06	4.40088e-05
5189	PEX1	0.340745	1.3826e-06	4.4082e-05
171220	DSTNP2	0.246028	1.39385e-06	4.43557e-05
221424	LRRC73	-0.318586	1.40399e-06	4.45934e-05
51388	NIP7	-0.219955	1.41017e-06	4.47045e-05
57134	MAN1C1	0.306814	1.41339e-06	4.47216e-05
2812	GP1BB	-0.381684	1.42367e-06	4.49614e-05
114780	PKD1L2	0.887427	1.46385e-06	4.57145e-05
22871	NLGN1	-0.296942	1.46288e-06	4.57145e-05
112703	FAM71E1	-0.370491	1.45665e-06	4.57145e-05
22836	RHOBTB3	0.401167	1.46396e-06	4.57145e-05
257000	PLAC2	-0.568248	1.45377e-06	4.57145e-05
1390	CREM	-0.242957	1.45655e-06	4.57145e-05
7326	UBE2G1	-0.229931	1.47287e-06	4.58211e-05
55122	AKIRIN2	-0.304948	1.47025e-06	4.58211e-05
10268	RAMP3	-0.392262	1.50507e-06	4.67357e-05
4883	NPR3	-0.553058	1.53475e-06	4.75688e-05
54555	DDX49	-0.244254	1.54974e-06	4.79443e-05
6511	SLC1A6	-0.421058	1.58002e-06	4.87903e-05
29906	ST8SIA5	-0.360762	1.615e-06	4.97785e-05
56999	ADAMTS9	-0.245807	1.61937e-06	4.98211e-05
23635	SSBP2	-0.29473	1.62299e-06	4.98404e-05
29089	UBE2T	-0.293249	1.6474e-06	5.04972e-05
23598	PATZ1	0.261115	1.65055e-06	5.05008e-05
55617	TASP1	-0.401648	1.66168e-06	5.07483e-05
27031	NPHP3	0.513229	1.67625e-06	5.10716e-05
148103	ZNF599	-0.384318	1.6784e-06	5.10716e-05
9760	TOX	0.507106	1.68448e-06	5.11635e-05
343450	KCNT2	-0.45345	1.71985e-06	5.21114e-05
81551	STMN4	-0.402493	1.72194e-06	5.21114e-05
7036	TFR2	0.265754	1.74935e-06	5.26826e-05
54769	DIRAS2	-0.437628	1.74719e-06	5.26826e-05
9215	LARGE	-0.293248	1.75029e-06	5.26826e-05
790	CAD	0.236777	1.81647e-06	5.45759e-05
51026	GOLT1B	-0.220073	1.8271e-06	5.47965e-05
4134	MAP4	0.270867	1.83166e-06	5.48348e-05
2258	FGF13	-0.333172	1.85613e-06	5.53713e-05
23053	KIAA0913	0.238622	1.85623e-06	5.53713e-05
54458	PRR13	0.264564	1.86593e-06	5.55614e-05
65059	RAPH1	-0.279029	1.91952e-06	5.70553e-05
89848	FCHSD1	0.196707	1.93263e-06	5.73428e-05
800	CALD1	0.399017	2.0117e-06	5.95829e-05
8996	NOL3	0.298371	2.04134e-06	6.03536e-05
51673	TPPP3	0.370715	2.05736e-06	6.07194e-05
3350	HTR1A	0.364551	2.07277e-06	6.10663e-05
339287	MSL1	-0.209947	2.15865e-06	6.34195e-05
8724	SNX3	-0.253785	2.16026e-06	6.34195e-05
6425	SFRP5	0.409432	2.16769e-06	6.35259e-05
9665	KIAA0430	0.447638	2.25629e-06	6.59274e-05
51138	COPS4	-0.360337	2.25755e-06	6.59274e-05
221421	RSPH9	-0.381561	2.26233e-06	6.59517e-05
165	AEBP1	0.516975	2.29865e-06	6.68936e-05
91419	XRCC6BP1	-0.43281	2.31355e-06	6.72098e-05
8607	RUVBL1	-0.237168	2.32031e-06	6.7289e-05
9536	PTGES	-0.439608	2.33456e-06	6.75847e-05
8372	HYAL3	-0.433586	2.34731e-06	6.78359e-05
8631	SKAP1	0.287579	2.36138e-06	6.81245e-05
5775	PTPN4	-0.37432	2.38608e-06	6.87184e-05
9200	PTPLA	-0.38314	2.42879e-06	6.98278e-05
5311	PKD2	0.361901	2.43879e-06	6.99946e-05
284023	LOC284023	0.332055	2.45567e-06	7.02372e-05
2185	PTK2B	0.239084	2.45166e-06	7.02372e-05
29965	C16orf5	0.286501	2.48565e-06	7.09729e-05
202559	KHDRBS2	-0.490208	2.51504e-06	7.16894e-05
140771	SMCR5	0.301102	2.56283e-06	7.29269e-05
26471	NUPR1	0.662018	2.56764e-06	7.29393e-05
57475	PLEKHH1	0.275466	2.60461e-06	7.38637e-05
10815	CPLX1	0.308405	2.62632e-06	7.43529e-05
114900	C1QTNF4	-0.387205	2.63543e-06	7.43971e-05
10558	SPTLC1	-0.222128	2.6368e-06	7.43971e-05
10675	CSPG5	-0.420386	2.66052e-06	7.49395e-05
51575	ESF1	0.232174	2.70558e-06	7.60802e-05
144402	CPNE8	-0.43944	2.71159e-06	7.61207e-05
10290	SPEG	-0.304795	2.751e-06	7.70975e-05
54934	KANSL2	-0.269123	2.75958e-06	7.72081e-05
283209	PGM2L1	-0.355271	2.78285e-06	7.77287e-05
220963	SLC16A9	0.508225	2.80257e-06	7.81485e-05
27255	CNTN6	-0.628524	2.82174e-06	7.85519e-05
221002	RASGEF1A	-0.27625	2.83935e-06	7.89103e-05
80728	ARHGAP39	0.327732	2.85443e-06	7.91975e-05
51701	NLK	-0.243432	2.87159e-06	7.95412e-05
9630	GNA14	0.542845	2.90704e-06	8.03896e-05
26153	KIF26A	-0.317551	2.95473e-06	8.15729e-05
116362	RBP7	0.575435	3.02741e-06	8.34413e-05
200205	IBA57	-0.447981	3.07398e-06	8.45851e-05
7869	SEMA3B	0.327962	3.1344e-06	8.61055e-05
7442	TRPV1	0.209712	3.18376e-06	8.73177e-05
116150	NUS1	-0.229455	3.20155e-06	8.76614e-05
4501	MT1X	0.454908	3.3032e-06	9.02966e-05
379	ARL4D	-0.444673	3.33706e-06	9.10727e-05
23086	EXPH5	-0.433687	3.41788e-06	9.31261e-05
728743	LOC728743	-0.322526	3.43639e-06	9.34777e-05
6000	RGS7	-0.45891	3.47381e-06	9.41882e-05
5934	RBL2	0.251287	3.47281e-06	9.41882e-05
58505	OSTC	-0.31467	3.50212e-06	9.48016e-05
30845	EHD3	0.293113	3.52179e-06	9.51797e-05
55016	2019-03-01	-0.440569	3.53548e-06	9.53952e-05
51617	HMP19	-0.281519	3.54552e-06	9.55115e-05
152926	PPM1K	0.291814	3.63082e-06	9.76514e-05
2166	FAAH	0.312904	3.65706e-06	9.81987e-05
339263	C17orf51	-0.432585	3.67492e-06	9.85199e-05
892	CCNC	-0.286486	3.69454e-06	9.87959e-05
340533	KIAA2022	-0.291355	3.69707e-06	9.87959e-05
284835	LINC00323	-0.510838	3.74859e-06	0.000100012
7917	BAG6	0.17929	3.77315e-06	0.000100027
120526	DNAJC24	-0.215399	3.77203e-06	0.000100027
84514	GHDC	0.278851	3.75775e-06	0.000100027
65990	FAM173A	-0.251419	3.76299e-06	0.000100027
10683	DLL3	-0.26785	3.83174e-06	0.000101419
26017	FAM32A	-0.223526	3.85503e-06	0.000101874
84552	PARD6G	0.384952	3.92521e-06	0.000103371
79858	NEK11	0.376827	3.93028e-06	0.000103371
169200	TMEM64	-0.333435	3.92615e-06	0.000103371
23150	FRMD4B	0.295829	3.99657e-06	0.000104784
10732	TCFL5	0.470823	3.99414e-06	0.000104784
84620	ST6GAL2	-0.51427	4.01124e-06	0.000105004
5532	PPP3CB	-0.361658	4.04692e-06	0.000105453
55704	CCDC88A	0.286779	4.04619e-06	0.000105453
874	CBR3	0.433524	4.04738e-06	0.000105453
399979	SNX19	0.264894	4.08173e-06	0.000106182
83714	NRIP2	0.320383	4.09839e-06	0.00010645
79161	C7orf23	0.295018	4.15429e-06	0.000107734
261729	STEAP2	0.321666	4.19074e-06	0.00010851
2762	GMDS	-0.305	4.25964e-06	0.000110123
375323	LHFPL4	0.347338	4.27156e-06	0.00011026
338657	CCDC84	0.229319	4.32828e-06	0.000111552
387036	GUSBP2	0.346252	4.36858e-06	0.000112297
5898	RALA	-0.272179	4.37067e-06	0.000112297
23492	CBX7	0.32184	4.3926e-06	0.000112687
22870	PPP6R1	-0.244529	4.44184e-06	0.00011375
51009	DERL2	-0.245204	4.44768e-06	0.00011375
80017	C14orf159	0.26471	4.47362e-06	0.000114064
81669	CCNL2	0.27274	4.46715e-06	0.000114064
10208	USPL1	-0.359027	4.53143e-06	0.000115361
83547	RILP	0.37774	4.5429e-06	0.000115477
84940	CORO6	0.281095	4.55369e-06	0.000115575
79923	NANOG	0.373422	4.56665e-06	0.000115728
575	BAI1	-0.343191	4.59208e-06	0.000116196
221938	MMD2	-0.287971	4.64744e-06	0.000117249
641977	SEPT7P2	0.369295	4.64775e-06	0.000117249
79183	TTPAL	-0.268268	4.67978e-06	0.000117822
3443	IFNA6	0.319076	4.68464e-06	0.000117822
26035	GLCE	-0.300099	4.7013e-06	0.000118009
25777	SUN2	0.388381	4.70621e-06	0.000118009
6252	RTN1	-0.317552	4.71709e-06	0.000118104
55592	GOLGA2P5	0.273803	4.72747e-06	0.000118187
220382	FAM181B	0.34223	4.73959e-06	0.000118312
10241	CALCOCO2	0.199808	4.79048e-06	0.000119404
51020	HDDC2	0.390375	4.86338e-06	0.00012104
84522	JAGN1	-0.215534	4.97196e-06	0.000123558
51259	TMEM216	0.317025	5.04433e-06	0.00012517
22941	SHANK2	-0.25592	5.08169e-06	0.00012591
57670	KIAA1549	-0.23205	5.14579e-06	0.000127295
5476	CTSA	0.247643	5.15288e-06	0.000127295
10466	COG5	0.184912	5.20212e-06	0.000127943
3301	DNAJA1	-0.375763	5.2012e-06	0.000127943
64061	TSPYL2	0.316199	5.19674e-06	0.000127943
9258	MFHAS1	0.334477	5.23247e-06	0.0001285
51084	CRYL1	0.312135	5.25793e-06	0.000128757
780	DDR1	0.190381	5.2584e-06	0.000128757
5743	PTGS2	-0.680828	5.28993e-06	0.00012934
27309	ZNF330	0.265433	5.34422e-06	0.000130476
6567	SLC16A2	-0.327984	5.42665e-06	0.000132294
6196	RPS6KA2	0.243396	5.45053e-06	0.000132683
4026	LPP	0.408138	5.47176e-06	0.000133005
55125	CEP192	0.310665	5.48382e-06	0.000133104
5499	PPP1CA	-0.231818	5.50585e-06	0.000133445
2131	EXT1	-0.236778	5.52315e-06	0.00013367
145773	FAM81A	0.370616	5.65085e-06	0.00013653
5138	PDE2A	-0.354049	5.6577e-06	0.00013653
25814	ATXN10	-0.252908	5.68215e-06	0.000136724
54492	NEURL1B	-0.405927	5.67424e-06	0.000136724
158427	TSTD2	0.233737	5.89859e-06	0.000141728
84945	ABHD13	-0.251922	5.91898e-06	0.000141809
9797	TATDN2	-0.22088	5.91201e-06	0.000141809
7089	TLE2	0.340793	6.05421e-06	0.000144841
9993	DGCR2	0.307255	6.08678e-06	0.000145411
3309	HSPA5	-0.383102	6.11312e-06	0.000145623
285464	CRIPAK	0.418439	6.10983e-06	0.000145623
25945	PVRL3	-0.491299	6.13505e-06	0.000145937
55068	ENOX1	-0.304691	6.16628e-06	0.000146471
84524	ZC3H8	-0.387363	6.30958e-06	0.000149662
136	ADORA2B	-0.424104	6.32105e-06	0.000149721
7205	TRIP6	0.15201	6.34048e-06	0.000149968
729770	LOC729770	-0.363313	6.37774e-06	0.000150636
8233	ZRSR2	0.277241	6.53578e-06	0.00015415
26984	SEC22A	-0.209912	6.55983e-06	0.000154499
594842	HAS2-AS1	-0.505955	6.64203e-06	0.000155443
10923	SUB1	-0.278672	6.65585e-06	0.000155443
6256	RXRA	0.462218	6.64566e-06	0.000155443
126695	C1orf172	0.368056	6.65178e-06	0.000155443
9375	TM9SF2	-0.2508	6.61991e-06	0.000155443
118491	TTC18	0.458671	6.61487e-06	0.000155443
7260	TSSC1	-0.21452	6.71354e-06	0.000156571
83699	SH3BGRL2	0.312487	6.82662e-06	0.000158863
3157	HMGCS1	-0.402746	6.83087e-06	0.000158863
136647	C7orf11	-0.242789	6.87418e-06	0.000159648
4900	NRGN	-0.365633	6.96236e-06	0.000161471
7423	VEGFB	0.303185	6.97614e-06	0.000161527
221060	C10orf111	-0.446831	6.98415e-06	0.000161527
9837	GINS1	-0.381649	7.02645e-06	0.00016228
1024	CDK8	-0.262191	7.09604e-06	0.00016366
23786	BCL2L13	0.216529	7.11407e-06	0.00016385
64506	CPEB1	0.293289	7.1278e-06	0.000163939
8481	OFD1	0.217715	7.19935e-06	0.000165357
5208	PFKFB2	0.227115	7.23223e-06	0.000165688
51514	DTL	-0.339834	7.23363e-06	0.000165688
51148	CERCAM	0.437406	7.33005e-06	0.000167666
79741	C10orf68	0.422737	7.57428e-06	0.000173015
10555	AGPAT2	0.247552	7.63052e-06	0.000174061
4967	OGDH	0.312374	7.64603e-06	0.000174177
5134	PDCD2	-0.165142	7.66546e-06	0.000174381
79026	AHNAK	0.233038	7.72068e-06	0.000175398
9263	STK17A	-0.360221	7.77489e-06	0.000176114
154467	CCDC167	-0.251965	7.7669e-06	0.000176114
57222	ERGIC1	-0.32366	7.78387e-06	0.000176114
30008	EFEMP2	0.322256	7.80252e-06	0.000176297
57575	PCDH10	-0.263918	7.8306e-06	0.000176692
79058	ASPSCR1	0.196266	7.84613e-06	0.000176803
79869	CPSF7	0.286243	7.87059e-06	0.000177115
205327	C2orf69	-0.251585	7.94937e-06	0.000178406
27235	COQ2	-0.294581	7.93928e-06	0.000178406
84989	LOC84989	-0.224373	8.02641e-06	0.000179893
80013	FAM188A	-0.241357	8.047e-06	0.000180112
23269	MGA	0.248712	8.16258e-06	0.000182455
26045	LRRTM2	-0.261457	8.19489e-06	0.000182931
28992	MACROD1	0.378018	8.25105e-06	0.000183939
490	ATP2B1	-0.235627	8.2944e-06	0.000184658
27145	FILIP1	-0.52757	8.36378e-06	0.000185955
84236	RHBDD1	0.240955	8.40612e-06	0.000186647
11129	CLASRP	0.305525	8.4661e-06	0.00018748
100131998	RRN3P3	-0.277942	8.45788e-06	0.00018748
7094	TLN1	0.0876655	8.47887e-06	0.000187514
84129	ACAD11	0.395652	8.56221e-06	0.000189106
23312	DMXL2	-0.279794	8.58783e-06	0.000189421
51054	PLEKHA8P1	0.385217	8.64062e-06	0.000190333
6478	SIAH2	-0.211368	8.73974e-06	0.00019201
6385	SDC4	0.287543	8.73194e-06	0.00019201
92691	TMEM169	-0.414549	8.75451e-06	0.000192081
201191	SAMD14	0.362345	8.81583e-06	0.000192947
57519	STARD9	0.303412	8.81713e-06	0.000192947
113177	IZUMO4	0.288411	8.82913e-06	0.000192956
55733	HHAT	0.434434	8.8969e-06	0.000193929
5919	RARRES2	0.379208	8.89589e-06	0.000193929
9201	DCLK1	-0.358791	8.9714e-06	0.000195298
27324	TOX3	-0.418388	9.04575e-06	0.00019666
56928	SPPL2B	0.218019	9.13457e-06	0.000198332
375057	C1orf95	-0.379463	9.16913e-06	0.000198823
79095	C9orf16	-0.217412	9.26616e-06	0.000200667
219681	ARMC3	0.733437	9.30471e-06	0.00020118
3796	KIF2A	-0.373792	9.31402e-06	0.00020118
85001	MGC16275	0.378598	9.35907e-06	0.000201892
79139	DERL1	-0.397226	9.43989e-06	0.000203372
242	ALOX12B	0.293562	9.50127e-06	0.000204167
4751	NEK2	-0.390395	9.4891e-06	0.000204167
100532736	C1orf151-NBL1	-0.305583	9.54338e-06	0.000204808
84698	CAPS2	0.365689	9.62061e-06	0.0002062
8916	HERC3	0.264788	9.66276e-06	0.000206416
131965	METTL6	-0.179042	9.67938e-06	0.000206416
5746	PTH2R	0.4905	9.65492e-06	0.000206416
5713	PSMD7	-0.221301	9.6802e-06	0.000206416
84248	FYTTD1	-0.199052	9.7166e-06	0.000206928
6770	STAR	0.301623	9.82647e-06	0.000209001
2200	FBN1	0.333175	9.89143e-06	0.000210114
79140	CCDC28B	-0.223793	9.95422e-06	0.000211179
7280	TUBB2A	-0.207278	1.01289e-05	0.000214611
4685	NCAM2	-0.33243	1.0144e-05	0.000214659
399668	LINC00086	-0.215631	1.02146e-05	0.000215878
83860	TAF3	0.3533	1.03811e-05	0.000218731
51260	CXorf26	-0.228639	1.03784e-05	0.000218731
5204	PFDN5	0.253453	1.03889e-05	0.000218731
23325	KIAA1033	0.241128	1.04153e-05	0.000218734
55312	RFK	-0.229759	1.04048e-05	0.000218734
8577	TMEFF1	-0.346588	1.04292e-05	0.000218751
7336	UBE2V2	-0.211718	1.04668e-05	0.000219263
11069	RAPGEF4	-0.324038	1.05609e-05	0.000220957
56980	PRDM10	-0.224885	1.0578e-05	0.000221038
83450	LRRC48	0.448915	1.06408e-05	0.000222071
5019	OXCT1	-0.276795	1.06726e-05	0.000222456
57088	PLSCR4	0.445716	1.09383e-05	0.00022771
145226	RDH12	-0.318191	1.11644e-05	0.000232127
23051	ZHX3	0.20194	1.11984e-05	0.000232544
91746	YTHDC1	0.244798	1.12704e-05	0.000233749
836	CASP3	-0.260186	1.13399e-05	0.000234897
4494	MT1F	0.43701	1.14639e-05	0.000237171
60559	SPCS3	-0.313515	1.14843e-05	0.000237299
5690	PSMB2	-0.224611	1.16167e-05	0.000239739
10987	COPS5	-0.185006	1.17231e-05	0.000241112
29894	CPSF1	0.236206	1.17267e-05	0.000241112
2824	GPM6B	-0.246359	1.17064e-05	0.000241112
8697	CDC23	-0.213854	1.19145e-05	0.000244673
10272	FSTL3	0.214271	1.20113e-05	0.000245908
4599	MX1	0.419967	1.20189e-05	0.000245908
1108	CHD4	0.224656	1.2e-05	0.000245908
25996	REXO2	-0.181476	1.20658e-05	0.000246565
9615	GDA	-0.258007	1.21559e-05	0.000247715
56961	SHD	0.433605	1.21815e-05	0.000247715
32	ACACB	0.305202	1.21705e-05	0.000247715
79701	C17orf101	0.233117	1.21488e-05	0.000247715
3992	FADS1	0.332626	1.22031e-05	0.000247852
84889	SLC7A3	0.262368	1.23011e-05	0.000249538
2535	FZD2	-0.338055	1.24268e-05	0.000251783
56978	PRDM8	-0.298082	1.24678e-05	0.000252306
64784	CRTC3	0.320431	1.2601e-05	0.000254694
23175	LPIN1	0.318039	1.26274e-05	0.000254917
84539	MCHR2	-0.432282	1.27773e-05	0.000257631
10221	TRIB1	-0.510182	1.28146e-05	0.000258072
5338	PLD2	0.484599	1.29558e-05	0.000259973
770	CA11	-0.308063	1.2954e-05	0.000259973
10606	PAICS	0.270102	1.29279e-05	0.000259973
55502	HES6	0.395683	1.30197e-05	0.000260941
201292	TRIM65	0.230399	1.30579e-05	0.000261394
100131755	ARMCX4	0.291663	1.30983e-05	0.000261888
3295	HSD17B4	0.267359	1.33046e-05	0.000265694
2352	FOLR3	0.307726	1.35282e-05	0.000269835
80205	CHD9	0.261831	1.35878e-05	0.000270701
1633	DCK	-0.295387	1.37098e-05	0.000272806
283345	RPL13P5	0.436822	1.39839e-05	0.000277927
81671	VMP1	-0.254885	1.40933e-05	0.000279769
782	CACNB1	-0.197945	1.4186e-05	0.000281274
80069	C6orf208	0.43367	1.4293e-05	0.000283059
51571	FAM49B	-0.184343	1.43483e-05	0.000283818
51072	MEMO1	-0.231591	1.45212e-05	0.000286558
286	ANK1	0.365824	1.45193e-05	0.000286558
65078	RTN4R	-0.29466	1.45499e-05	0.000286785
55203	LGI2	-0.403213	1.47261e-05	0.000289915
11313	LYPLA2	-0.149063	1.51038e-05	0.000297
10162	LPCAT3	-0.225529	1.51621e-05	0.000297691
25886	POC1A	-0.242552	1.51864e-05	0.000297691
55130	ARMC4	-0.722151	1.51977e-05	0.000297691
54629	FAM63B	0.251746	1.52104e-05	0.000297691
57212	TP73-AS1	0.255342	1.52939e-05	0.000298975
26034	IPCEF1	0.336933	1.5397e-05	0.000300637
84557	MAP1LC3A	-0.214601	1.54656e-05	0.000301624
4885	NPTX2	-0.427314	1.54923e-05	0.000301793
55145	THAP1	-0.247645	1.57361e-05	0.000306184
51294	PCDH12	-0.474278	1.57608e-05	0.000306308
84056	KATNAL1	-0.20015	1.6022e-05	0.000310659
23671	TMEFF2	-0.242727	1.60133e-05	0.000310659
116254	C6orf72	0.267047	1.60837e-05	0.000311493
23040	MYT1L	-0.292576	1.63693e-05	0.000316657
11040	PIM2	-0.281161	1.65496e-05	0.000319773
2108	ETFA	-0.230059	1.65905e-05	0.000320193
9651	PLCH2	-0.391616	1.67047e-05	0.000322024
441376	C8orf85	-0.591096	1.67604e-05	0.000322725
4291	MLF1	-0.289252	1.68283e-05	0.000322913
116372	LYPD1	-0.249343	1.68114e-05	0.000322913
50717	DCAF8	0.23437	1.67944e-05	0.000322913
51339	DACT1	-0.464425	1.69504e-05	0.000324883
1393	CRHBP	-0.553951	1.71493e-05	0.000328318
960	CD44	0.231518	1.74518e-05	0.000333725
55884	WSB2	-0.229044	1.75665e-05	0.000335535
400961	PAIP2B	0.591502	1.82629e-05	0.000348437
55133	SRBD1	0.334751	1.83133e-05	0.000348999
1176	AP3S1	-0.350124	1.84859e-05	0.000351731
30813	VSX1	0.162852	1.84988e-05	0.000351731
1466	CSRP2	0.421843	1.85418e-05	0.000352147
6448	SGSH	0.275435	1.87042e-05	0.000354827
6468	FBXW4	0.206874	1.8778e-05	0.000355417
55324	ABCF3	0.18986	1.87761e-05	0.000355417
9427	ECEL1	-0.405788	1.885e-05	0.000356376
4664	NAB1	0.232362	1.89431e-05	0.00035773
2766	GMPR	0.39869	1.91181e-05	0.000360627
7181	NR2C1	0.263001	1.91708e-05	0.000361213
84817	TXNDC17	-0.213663	1.93279e-05	0.000363761
217	ALDH2	0.33567	1.96017e-05	0.000368498
9169	SCAF11	0.193013	2.00197e-05	0.000375933
54469	ZFAND6	-0.22758	2.01362e-05	0.000377696
84707	BEX2	-0.192087	2.01591e-05	0.0003777
23567	ZNF346	-0.184487	2.07205e-05	0.000387782
22992	KDM2A	0.222721	2.08078e-05	0.000388625
4499	MT1M	0.479185	2.08121e-05	0.000388625
27250	PDCD4	0.184258	2.08917e-05	0.000389675
7273	TTN	0.0634179	2.09251e-05	0.000389861
55270	NUDT15	-0.39092	2.09681e-05	0.000390228
145474	LOC145474	0.389596	2.10741e-05	0.000391763
2170	FABP3	-0.421778	2.11744e-05	0.000392871
23207	PLEKHM2	0.315091	2.11809e-05	0.000392871
51175	TUBE1	0.300822	2.122e-05	0.00039316
91851	CHRDL1	-0.38424	2.15387e-05	0.000398621
51226	COPZ2	0.255461	2.19149e-05	0.000405135
65999	LRRC61	-0.389222	2.21071e-05	0.000408234
1020	CDK5	-0.221845	2.23585e-05	0.000412421
6867	TACC1	0.241344	2.26423e-05	0.000417193
875	CBS	0.263188	2.27848e-05	0.000419355
51501	C11orf73	-0.214156	2.29119e-05	0.00042123
114902	C1QTNF5	0.220267	2.29978e-05	0.000422343
51244	C3orf19	0.262785	2.34511e-05	0.000430194
90861	HN1L	0.403444	2.37183e-05	0.000434619
79686	LINC00341	0.448738	2.43513e-05	0.000445727
6622	SNCA	-0.292186	2.45426e-05	0.000448737
286053	NSMCE2	0.242691	2.46794e-05	0.000450744
136319	MTPN	-0.258897	2.50348e-05	0.000456735
60485	SAV1	0.234937	2.50659e-05	0.000456803
2977	GUCY1A2	-0.413678	2.51537e-05	0.000457901
8913	CACNA1G	-0.181318	2.51847e-05	0.000457966
50807	ASAP1	-0.239639	2.53917e-05	0.000461227
11238	CA5B	0.398334	2.56239e-05	0.000463929
51117	COQ4	0.223466	2.56065e-05	0.000463929
4088	SMAD3	-0.225595	2.56038e-05	0.000463929
11122	PTPRT	0.262772	2.57703e-05	0.000466074
23511	NUP188	0.234953	2.58569e-05	0.000466131
57583	TMEM181	-0.235587	2.58315e-05	0.000466131
3268	AGFG2	0.192577	2.58573e-05	0.000466131
79640	C22orf46	0.319297	2.59181e-05	0.000466722
6271	S100A1	0.334906	2.63291e-05	0.000473382
25827	FBXL2	-0.246755	2.63447e-05	0.000473382
55634	ZNF673	0.244471	2.64239e-05	0.000474293
9679	FAM53B	0.197261	2.65111e-05	0.000475348
2035	EPB41	0.23809	2.6573e-05	0.000475945
23317	DNAJC13	-0.249923	2.67466e-05	0.000478541
10570	DPYSL4	-0.197545	2.69212e-05	0.000481148
6584	SLC22A5	0.260286	2.70413e-05	0.000482777
10311	DSCR3	-0.242262	2.70881e-05	0.000483095
84062	DTNBP1	0.237848	2.71343e-05	0.000483402
51275	C12orf47	-0.243502	2.73051e-05	0.000485925
667	DST	0.192323	2.74577e-05	0.00048812
10791	VAMP5	0.232252	2.7575e-05	0.000489683
64397	ZFP106	0.320541	2.77888e-05	0.000492432
8891	EIF2B3	-0.27758	2.77868e-05	0.000492432
6422	SFRP1	0.52274	2.78904e-05	0.000493707
25825	BACE2	-0.312444	2.7981e-05	0.000494786
51764	GNG13	0.197626	2.82302e-05	0.000498136
83930	STARD3NL	-0.244716	2.82115e-05	0.000498136
10904	BLCAP	0.239093	2.82686e-05	0.000498286
9731	CEP104	0.33096	2.84789e-05	0.000501464
375449	MAST4	0.270248	2.90088e-05	0.000510256
55084	SOBP	-0.348807	2.91517e-05	0.000511689
116984	ARAP2	0.27789	2.91342e-05	0.000511689
79745	CLIP4	0.284089	2.92537e-05	0.000512939
978	CDA	0.249843	2.94149e-05	0.000514684
6730	SRP68	0.203323	2.94101e-05	0.000514684
11240	PADI2	0.463553	2.96824e-05	0.00051882
55780	C6orf70	0.264574	3.01129e-05	0.000524694
22865	SLITRK3	-0.281076	3.00788e-05	0.000524694
125476	INO80C	-0.178567	3.00838e-05	0.000524694
5073	PARN	0.170552	3.01772e-05	0.000525266
6038	RNASE4	0.290388	3.06108e-05	0.000532258
23464	GCAT	0.189364	3.07014e-05	0.000533276
1734	DIO2	-0.613573	3.08733e-05	0.000535705
55667	DENND4C	0.250341	3.0955e-05	0.000536565
5869	RAB5B	0.179029	3.12281e-05	0.000540174
326343	MT1DP	0.384069	3.12274e-05	0.000540174
23052	ENDOD1	0.290963	3.12768e-05	0.000540457
23039	XPO7	-0.264245	3.15502e-05	0.000544617
8543	LMO4	-0.288438	3.1643e-05	0.00054509
400120	SERTM1	-0.550579	3.16187e-05	0.00054509
56906	THAP10	0.330215	3.17056e-05	0.000545604
113	ADCY7	-0.43204	3.17443e-05	0.000545708
100507577	LOC100507577	0.455447	3.23839e-05	0.000556129
9209	LRRFIP2	0.160402	3.24977e-05	0.00055751
8573	CASK	-0.17129	3.30665e-05	0.000566179
9448	MAP4K4	0.161738	3.31049e-05	0.000566179
9909	DENND4B	0.274656	3.31031e-05	0.000566179
27229	TUBGCP4	-0.33498	3.31396e-05	0.000566192
6697	SPR	0.240701	3.33732e-05	0.000569599
9140	ATG12	-0.291083	3.35207e-05	0.000571532
55284	UBE2W	-0.253241	3.37691e-05	0.000575179
6304	SATB1	-0.23244	3.3943e-05	0.000577551
5224	PGAM2	0.404016	3.40509e-05	0.000578756
79767	ELMO3	0.320744	3.40833e-05	0.000578756
7356	SCGB1A1	0.259782	3.44499e-05	0.000584387
9097	USP14	-0.235406	3.46247e-05	0.000586756
28986	MAGEH1	-0.254913	3.47497e-05	0.000588275
169834	ZNF883	-0.318218	3.49626e-05	0.000591279
154865	IQUB	0.365785	3.50721e-05	0.000592529
26112	CCDC69	0.373982	3.51827e-05	0.000593797
9955	HS3ST3A1	-0.516867	3.53112e-05	0.000594762
197358	NLRC3	-0.568368	3.52856e-05	0.000594762
8347	HIST1H2BC	-0.320884	3.58814e-05	0.000603756
90	ACVR1	-0.292046	3.59687e-05	0.000604007
114884	OSBPL10	-0.202409	3.595e-05	0.000604007
388165	UBE2Q2P1	0.270745	3.61172e-05	0.000605889
79970	ZNF767	0.256227	3.70262e-05	0.000620515
825	CAPN3	0.243126	3.73963e-05	0.000625197
10868	USP20	0.222759	3.73619e-05	0.000625197
55661	DDX27	0.196008	3.74181e-05	0.000625197
51003	MED31	-0.26654	3.75002e-05	0.000625317
6657	SOX2	0.267468	3.74663e-05	0.000625317
27163	NAAA	0.418998	3.76321e-05	0.000626889
5580	PRKCD	-0.452861	3.77667e-05	0.000628503
23336	SYNM	0.251745	3.79404e-05	0.000629508
23429	RYBP	-0.288036	3.79194e-05	0.000629508
8495	PPFIBP2	0.280411	3.78668e-05	0.000629508
3163	HMOX2	-0.192108	3.82747e-05	0.000634424
10840	ALDH1L1	0.281791	3.83598e-05	0.000635203
60481	ELOVL5	-0.352919	3.86947e-05	0.000640113
2954	GSTZ1	0.315153	3.88843e-05	0.000642612
963	CD53	0.541576	3.89481e-05	0.00064303
2885	GRB2	-0.197274	3.91717e-05	0.000644805
283796	GOLGA8IP	0.183052	3.91579e-05	0.000644805
9881	TRANK1	0.364039	3.9105e-05	0.000644805
9079	LDB2	-0.327759	3.92289e-05	0.00064511
55691	FRMD4A	-0.177824	3.98721e-05	0.000653924
342979	PALM3	0.30407	3.98107e-05	0.000653924
84289	ING5	0.299191	3.98825e-05	0.000653924
6085	RNY3	0.212824	4.01724e-05	0.00065803
5528	PPP2R5D	0.208203	4.0351e-05	0.000660308
10152	ABI2	-0.166381	4.05538e-05	0.000662326
79961	DENND2D	0.398018	4.05408e-05	0.000662326
9645	MICAL2	-0.233824	4.0976e-05	0.000668566
3633	INPP5B	0.286583	4.13852e-05	0.000674582
65983	GRAMD3	0.277618	4.15493e-05	0.000676596
143689	PIWIL4	0.326952	4.16652e-05	0.000677822
23113	CUL9	0.262531	4.17328e-05	0.00067826
5549	PRELP	0.437468	4.17898e-05	0.000678526
577	BAI3	-0.386761	4.18569e-05	0.000678953
5322	PLA2G5	-0.694586	4.19502e-05	0.000679805
23013	SPEN	0.215975	4.20924e-05	0.000681448
6941	TCF19	0.435737	4.24863e-05	0.000687157
518	ATP5G3	-0.212254	4.25619e-05	0.000687713
23583	SMUG1	-0.213843	4.3211e-05	0.000697526
1153	CIRBP	0.200338	4.33543e-05	0.000699162
2065	ERBB3	0.33985	4.45644e-05	0.000717982
57038	RARS2	-0.253368	4.4689e-05	0.000719295
2202	EFEMP1	0.380219	4.47556e-05	0.000719671
83874	TBC1D10A	-0.248054	4.48252e-05	0.000720097
55853	IDI2-AS1	0.441697	4.50158e-05	0.000722463
27043	PELP1	0.210362	4.52163e-05	0.000724983
114818	KLHL29	-0.363207	4.53937e-05	0.000727128
26811	SNORD55	-0.229742	4.55303e-05	0.000728616
51714	SELT	-0.229609	4.60168e-05	0.000735695
55966	AJAP1	-0.361586	4.63489e-05	0.000740296
54557	SGTB	-0.665564	4.68145e-05	0.000747016
25778	DSTYK	0.242859	4.71755e-05	0.000752056
1958	EGR1	-0.737345	4.7601e-05	0.000758116
10144	FAM13A	0.179435	4.81495e-05	0.000765477
6713	SQLE	-0.329798	4.8155e-05	0.000765477
100128076	LOC100128076	0.270282	4.84389e-05	0.000769255
28978	TMEM14A	-0.241929	4.85006e-05	0.000769503
11171	STRAP	-0.258632	4.87863e-05	0.0007733
7994	KAT6A	0.232892	4.8999e-05	0.000775748
26040	SETBP1	-0.203297	4.90338e-05	0.000775748
51726	DNAJB11	-0.278144	4.91887e-05	0.000777462
84107	ZIC4	0.33266	4.97985e-05	0.000786354
91012	CERS5	0.25641	5.00036e-05	0.000788845
126	ADH1C	0.503951	5.00726e-05	0.000789187
55268	ECHDC2	0.18799	5.03975e-05	0.000793559
3799	KIF5B	0.281246	5.06437e-05	0.000796683
3661	IRF3	0.186343	5.08684e-05	0.000798275
5092	PCBD1	0.253977	5.08885e-05	0.000798275
84681	HINT2	0.168039	5.07943e-05	0.000798275
51430	C1orf9	-0.196204	5.10827e-05	0.000800567
10576	CCT2	-0.259114	5.13946e-05	0.000803944
29985	SLC39A3	-0.127409	5.13637e-05	0.000803944
56731	SLC2A4RG	0.287041	5.19351e-05	0.000811637
5992	RFX4	0.199849	5.21445e-05	0.000813784
783	CACNB2	-0.208905	5.217e-05	0.000813784
28985	MCTS1	-0.248767	5.25329e-05	0.000818678
3482	IGF2R	0.240508	5.27221e-05	0.00082086
23254	KAZN	0.195254	5.30802e-05	0.000825665
1106	CHD2	0.137867	5.33147e-05	0.000828539
27111	SDCBP2	0.167815	5.34368e-05	0.000829664
10401	PIAS3	0.230335	5.37803e-05	0.00083422
339231	ARL16	-0.2772	5.45606e-05	0.000845536
51196	PLCE1	0.240944	5.47804e-05	0.000848156
7476	WNT7A	-0.387692	5.50002e-05	0.000850768
55970	GNG12	0.289219	5.54391e-05	0.000856763
84899	TMTC4	0.370205	5.57417e-05	0.000860641
83468	GLT8D2	-0.32579	5.58882e-05	0.000862105
8835	SOCS2	-0.294616	5.63091e-05	0.000867796
8550	MAPKAPK5	-0.238785	5.63837e-05	0.000868142
3575	IL7R	-0.54289	5.64462e-05	0.000868304
766	CA7	-0.253814	5.67166e-05	0.000871658
404734	ANKHD1-EIF4EBP3	0.11351	5.68854e-05	0.000872702
11266	DUSP12	-0.221275	5.68892e-05	0.000872702
23760	PITPNB	-0.172258	5.70563e-05	0.000873659
364	AQP7	0.172364	5.70365e-05	0.000873659
8498	RANBP3	0.114109	5.74806e-05	0.000879094
1642	DDB1	0.165685	5.75167e-05	0.000879094
100302741	RNU6-15	0.281049	5.76709e-05	0.000880643
60386	SLC25A19	-0.243798	5.7852e-05	0.000880988
51147	ING4	-0.247781	5.78368e-05	0.000880988
1783	DYNC1LI2	0.247748	5.77999e-05	0.000880988
26150	RIBC2	0.87729	5.85089e-05	0.000889965
6183	MRPS12	-0.197443	5.85675e-05	0.000889965
85378	TUBGCP6	0.23674	5.86016e-05	0.000889965
23708	GSPT2	-0.215628	5.90773e-05	0.000896373
79649	MAP7D3	0.286656	5.91864e-05	0.000897212
3838	KPNA2	-0.238791	5.97314e-05	0.000904652
10580	SORBS1	0.165607	6.06864e-05	0.000918281
5058	PAK1	-0.281698	6.13078e-05	0.000926842
9369	NRXN3	-0.139424	6.20817e-05	0.000936505
81706	PPP1R14C	-0.359439	6.20584e-05	0.000936505
5818	PVRL1	-0.129266	6.21154e-05	0.000936505
950	SCARB2	0.216532	6.24309e-05	0.000940411
5364	PLXNB1	0.263669	6.3215e-05	0.000951362
27343	POLL	0.196502	6.35754e-05	0.000955923
56475	RPRM	-0.426399	6.36754e-05	0.000956133
27133	KCNH5	-0.378671	6.37039e-05	0.000956133
55859	BEX1	-0.260578	6.41318e-05	0.000960608
1977	EIF4E	-0.308077	6.40852e-05	0.000960608
79447	C16orf53	0.243158	6.4175e-05	0.000960608
27289	RND1	-0.350215	6.42464e-05	0.000960814
1404	HAPLN1	-0.407452	6.43198e-05	0.000961051
118980	SFXN2	0.16357	6.47297e-05	0.000966309
53918	PELO	-0.324511	6.49073e-05	0.000967975
25925	ZNF521	-0.301927	6.49574e-05	0.000967975
2042	EPHA3	-0.15929	6.52303e-05	0.000971175
84684	INSM2	0.365036	6.54391e-05	0.000972593
81619	TSPAN14	-0.30489	6.54422e-05	0.000972593
26873	OPLAH	0.33852	6.59279e-05	0.000978938
5747	PTK2	0.202366	6.60294e-05	0.000979573
51573	GDE1	-0.211682	6.62331e-05	0.000981722
55768	NGLY1	-0.191999	6.69328e-05	0.000991212
53616	ADAM22	-0.207153	6.74338e-05	0.000997745
5860	QDPR	0.247323	6.79935e-05	0.00100513
50640	PNPLA8	-0.300078	6.84852e-05	0.00101151
112936	VPS26B	-0.16672	6.87726e-05	0.00101485
190	NR0B1	-0.512625	6.9395e-05	0.00102133
11151	CORO1A	-0.228804	6.93641e-05	0.00102133
55631	LRRC40	-0.247186	6.92808e-05	0.00102133
6861	SYT5	-0.316346	6.96287e-05	0.00102386
10333	TLR6	-0.369823	7.02514e-05	0.0010312
11163	NUDT4	-0.546335	7.02113e-05	0.0010312
25791	NGEF	-0.288646	7.07883e-05	0.00103817
399744	LOC399744	0.161734	7.14992e-05	0.00104767
5629	PROX1	0.385297	7.16283e-05	0.00104864
8317	CDC7	-0.34446	7.1839e-05	0.0010508
858	CAV2	0.248711	7.22134e-05	0.00105535
23518	R3HDM1	-0.204487	7.29978e-05	0.00106588
2523	FUT1	0.243868	7.3365e-05	0.00107031
80775	TMEM177	-0.241479	7.40908e-05	0.00107995
167681	PRSS35	-0.494427	7.4173e-05	0.0010802
2978	GUCA1A	-0.480229	7.42532e-05	0.00108043
5125	PCSK5	-0.329117	7.47411e-05	0.00108658
23306	TMEM194A	0.210532	7.51987e-05	0.00109228
6782	HSPA13	-0.234473	7.54616e-05	0.00109399
57596	BEGAIN	-0.248517	7.54375e-05	0.00109399
283970	PDXDC2P	0.338205	7.55131e-05	0.00109399
9051	PSTPIP1	0.206981	7.58703e-05	0.00109726
130612	TMEM198	-0.270771	7.58263e-05	0.00109726
85352	KIAA1644	-0.340764	7.6146e-05	0.00110029
9625	AATK	0.179342	7.66522e-05	0.00110642
60625	DHX35	0.266257	7.6703e-05	0.00110642
3148	HMGB2	0.337278	7.7368e-05	0.00111332
50485	SMARCAL1	0.204874	7.73027e-05	0.00111332
254102	EHBP1L1	-0.262062	7.74487e-05	0.00111332
23048	FNBP1	0.335055	7.73972e-05	0.00111332
440	ASNS	-0.197229	7.75207e-05	0.0011134
6185	RPN2	-0.157011	7.76466e-05	0.00111425
10015	PDCD6IP	0.207763	7.78477e-05	0.00111617
9851	KIAA0753	-0.268019	7.7996e-05	0.00111734
84230	LRRC8C	-0.31227	7.88376e-05	0.00112843
9823	ARMCX2	-0.211939	7.90563e-05	0.00113059
9765	ZFYVE16	0.274439	7.93287e-05	0.0011328
4121	MAN1A1	-0.489266	7.93472e-05	0.0011328
148304	C1orf74	-0.33564	7.95499e-05	0.00113473
4094	MAF	-0.275462	7.97207e-05	0.00113619
83538	TTC25	0.293567	7.99743e-05	0.00113883
388588	LOC388588	0.285026	8.0152e-05	0.00114039
11021	RAB35	-0.176429	8.04914e-05	0.00114407
23345	SYNE1	0.178373	8.05577e-05	0.00114407
6387	CXCL12	-0.343489	8.06168e-05	0.00114407
10539	GLRX3	-0.196611	8.15479e-05	0.0011563
7093	TLL2	0.37013	8.17828e-05	0.00115865
161394	SAMD15	-0.349584	8.23089e-05	0.00116511
5696	PSMB8	0.189924	8.2934e-05	0.00117296
55876	GSDMB	0.24484	8.35783e-05	0.00118033
3066	HDAC2	-0.180603	8.35961e-05	0.00118033
79776	ZFHX4	0.211287	8.37003e-05	0.0011808
83657	DYNLRB2	0.265803	8.39009e-05	0.00118263
249	ALPL	-0.220011	8.42067e-05	0.00118594
79077	DCTPP1	-0.190925	8.43392e-05	0.0011868
1007	CDH9	-0.363461	8.46711e-05	0.00119046
79612	NAA16	0.18218	8.52356e-05	0.00119638
285527	FRYL	0.210583	8.52071e-05	0.00119638
80763	C12orf39	0.388703	8.56849e-05	0.00120168
91319	DERL3	-0.213595	8.59469e-05	0.00120434
286437	LOC286437	0.222655	8.6439e-05	0.00121022
63895	PIEZO2	0.510164	8.72404e-05	0.00122041
596	BCL2	0.228563	8.74965e-05	0.00122297
51699	VPS29	-0.165429	8.78048e-05	0.00122523
6002	RGS12	-0.18338	8.77655e-05	0.00122523
26002	MOXD1	0.454822	8.84021e-05	0.00123253
8741	TNFSF13	0.234835	8.87552e-05	0.00123642
112714	TUBA3E	-0.300441	8.93451e-05	0.00124242
51146	A4GNT	0.250073	8.93825e-05	0.00124242
6586	SLIT3	-0.323562	8.94421e-05	0.00124242
51535	PPHLN1	-0.138653	8.95586e-05	0.00124242
8614	STC2	0.352911	8.95136e-05	0.00124242
7586	ZKSCAN1	0.165544	8.99197e-05	0.00124536
2186	BPTF	0.187539	8.98503e-05	0.00124536
4053	LTBP2	0.285447	9.01061e-05	0.0012469
9762	ProSAPiP1	0.240733	9.02443e-05	0.00124778
100533106	ZHX1-C8ORF76	-0.253404	9.03916e-05	0.00124878
3598	IL13RA2	-0.646593	9.12512e-05	0.00125961
6597	SMARCA4	0.150064	9.16291e-05	0.00126378
51669	TMEM66	-0.245999	9.25769e-05	0.0012737
9695	EDEM1	0.278683	9.24877e-05	0.0012737
7137	TNNI3	-0.902241	9.25132e-05	0.0012737
2917	GRM7	-0.247159	9.27224e-05	0.00127465
100506791	LOC100506791	-0.348575	9.34019e-05	0.00128293
8204	NRIP1	-0.284487	9.36022e-05	0.00128462
23061	TBC1D9B	0.226124	9.48966e-05	0.00130132
8941	CDK5R2	-0.441228	9.528e-05	0.0013055
100129550	LOC100129550	-0.264675	9.54191e-05	0.00130633
55009	C19orf24	-0.237866	9.55142e-05	0.00130656
9039	UBA3	-0.199286	9.65155e-05	0.00131918
150465	TTL	-0.236319	9.66404e-05	0.0013198
8745	ADAM23	-0.187288	9.68014e-05	0.00132092
26058	GIGYF2	0.171503	9.70336e-05	0.001323
23371	TENC1	0.157211	9.72268e-05	0.00132456
23499	MACF1	0.171296	9.77453e-05	0.00132919
91316	GUSBP11	0.243695	9.77583e-05	0.00132919
1352	COX10	-0.237821	9.78062e-05	0.00132919
151963	MB21D2	-0.252647	9.80657e-05	0.00133163
4697	NDUFA4	-0.21401	9.86252e-05	0.00133814
9055	PRC1	0.287528	9.89786e-05	0.00134012
1893	ECM1	0.223677	9.90118e-05	0.00134012
84217	ZMYND12	0.467581	9.90011e-05	0.00134012
9519	TBPL1	-0.205369	9.9415e-05	0.00134448
4779	NFE2L1	0.207506	0.000100154	0.00135338
79155	TNIP2	0.227037	0.000100678	0.00135936
94104	GCFC1	0.203581	0.00010091	0.00136139
85464	SSH2	-0.193663	0.000102635	0.00138354
137695	TMEM68	-0.213141	0.000103276	0.00139105
7903	ST8SIA4	-0.221862	0.000103368	0.00139117
282969	C10orf125	-0.355137	0.000104282	0.00140234
113791	PIK3IP1	0.299421	0.000104445	0.00140341
7837	PXDN	0.304353	0.000104977	0.00140941
246182	AKR7A2P1	0.233762	0.000105991	0.00142188
534	ATP6V1G2	-0.222463	0.000106119	0.00142245
59343	SENP2	0.170423	0.000106578	0.00142289
100526693	ARPC4-TTLL3	0.24873	0.00010655	0.00142289
22796	COG2	0.191245	0.000106383	0.00142289
3067	HDC	-0.431985	0.000106291	0.00142289
8760	CDS2	0.162724	0.000106576	0.00142289
27115	PDE7B	-0.439034	0.000106755	0.00142411
4043	LRPAP1	-0.267889	0.00010773	0.00143598
100526772	TMEM110-MUSTN1	0.473591	0.000107868	0.00143666
11332	ACOT7	-0.190735	0.000108255	0.00144066
286046	XKR6	0.315659	0.000108623	0.00144106
80227	PAAF1	0.258358	0.00010863	0.00144106
1543	CYP1A1	-0.788791	0.000108378	0.00144106
51362	CDC40	-0.29183	0.000108504	0.00144106
1675	CFD	-0.368045	0.000108926	0.00144383
64645	HIAT1	-0.232337	0.000110047	0.00145753
54112	GPR88	-0.344516	0.000110482	0.00146097
152	ADRA2C	-0.246969	0.000110404	0.00146097
84865	CCDC142	0.200354	0.000112202	0.00148255
4258	MGST2	0.277784	0.000112356	0.0014834
5525	PPP2R5A	-0.188695	0.000112496	0.00148407
10768	AHCYL1	0.299719	0.000113949	0.00150206
55684	C9orf86	0.284805	0.000114423	0.00150634
25953	PNKD	0.117399	0.000114454	0.00150634
6147	RPL23A	0.165378	0.000114806	0.00150858
4673	NAP1L1	0.215337	0.000114727	0.00150858
4745	NELL1	-0.399024	0.000115458	0.00151595
7003	TEAD1	0.254116	0.00011559	0.00151649
51090	PLLP	0.268431	0.000116029	0.00152105
9828	ARHGEF17	0.228911	0.000117138	0.00153439
51075	TMX2	-0.202697	0.000117236	0.00153447
23338	PHF15	0.261676	0.000117961	0.00154214
79957	PAQR6	0.241833	0.000118007	0.00154214
91300	R3HDM4	-0.18045	0.00011924	0.00155704
10411	RAPGEF3	0.268224	0.000119906	0.00156451
11137	PWP1	-0.211085	0.000120046	0.0015651
6882	TAF11	-0.229488	0.000120294	0.00156711
140733	MACROD2	-0.248903	0.000121167	0.00157674
57568	SIPA1L2	-0.224832	0.000121222	0.00157674
30010	NXPH1	-0.258456	0.000121401	0.00157783
2785	GNG3	-0.326554	0.000122082	0.00158544
64221	ROBO3	0.288021	0.000122325	0.00158737
442720	EIF3IP1	-0.232428	0.000123613	0.00160284
80208	SPG11	0.201098	0.000124671	0.0016153
8321	FZD1	-0.307642	0.000125265	0.00162174
7857	SCG2	-0.371799	0.000126203	0.00163261
23303	KIF13B	0.214233	0.00012666	0.00163726
6507	SLC1A3	-0.430951	0.000126825	0.00163812
286319	TUSC1	-0.249682	0.000127169	0.00164002
6470	SHMT1	0.289782	0.000127158	0.00164002
23154	NCDN	0.212244	0.000127318	0.00164067
55844	PPP2R2D	-0.219174	0.000127727	0.00164366
26225	ARL5A	-0.192754	0.000127759	0.00164366
339983	NAT8L	0.174283	0.000127845	0.00164366
84125	LRRIQ1	0.358616	0.000128354	0.00164877
2014	EMP3	0.224071	0.000128441	0.00164877
9775	EIF4A3	-0.209004	0.000128658	0.00165028
8459	TPST2	-0.326536	0.000128938	0.0016526
10237	SLC35B1	-0.201511	0.000129545	0.00165656
171568	POLR3H	0.17088	0.000129382	0.00165656
153364	MBLAC2	-0.285667	0.000129523	0.00165656
166012	CHST13	-0.334085	0.000129958	0.00166057
84986	ARHGAP19	0.358741	0.000130273	0.00166299
254128	LOC254128	0.245346	0.000130354	0.00166299
9246	UBE2L6	0.150694	0.000130446	0.00166299
210	ALAD	0.198375	0.000131306	0.00167267
64924	SLC30A5	-0.122253	0.000132114	0.00168168
627	BDNF	-0.174804	0.000132324	0.00168307
6829	SUPT5H	0.247668	0.000132504	0.00168407
5999	RGS4	-0.333679	0.000133729	0.00169834
23014	FBXO21	0.207136	0.00013388	0.00169897
26953	RANBP6	0.240688	0.000134396	0.00170422
56853	CELF4	-0.195455	0.000134792	0.00170795
6616	SNAP25	-0.303911	0.000135055	0.00170998
375790	AGRN	-0.298998	0.000135578	0.0017153
6588	SLN	-0.876974	0.000136725	0.00172849
22901	ARSG	0.229526	0.000137797	0.00174074
54919	HEATR2	0.230309	0.000138261	0.00174528
10903	MTMR11	0.111021	0.000138819	0.00175099
56995	TULP4	0.381653	0.00013922	0.00175472
1006	CDH8	-0.3551	0.0001395	0.00175682
79968	WDR76	0.271432	0.000139597	0.00175682
1027	CDKN1B	0.221028	0.000140759	0.0017701
25977	NECAP1	-0.179889	0.000142042	0.00178489
84789	MGC2889	-0.257995	0.000142193	0.00178544
5081	PAX7	0.193571	0.000143162	0.00179498
317671	RFESD	0.329325	0.000143168	0.00179498
253982	ASPHD1	-0.252189	0.000144384	0.00180887
522	ATP5J	-0.199262	0.000145082	0.00181625
60487	TRMT11	0.198391	0.000145976	0.00182607
6262	RYR2	0.34805	0.000146115	0.00182644
1778	DYNC1H1	0.29449	0.000146634	0.00182866
6880	TAF9	-0.151475	0.000146731	0.00182866
8189	SYMPK	0.186999	0.000146535	0.00182866
1517	CTSL1P2	-0.273909	0.000146668	0.00182866
7690	ZNF131	-0.201107	0.000148531	0.00184971
3049	HBQ1	-0.356577	0.000148823	0.00185131
1767	DNAH5	-0.384022	0.000148882	0.00185131
375513	GUSBP4	0.238887	0.000149454	0.00185566
3821	KLRC1	-0.775065	0.000149366	0.00185566
4641	MYO1C	0.130046	0.00015113	0.00187507
1994	ELAVL1	-0.155822	0.000151332	0.00187618
26996	GPR160	-0.691717	0.000152431	0.00188711
81550	TDRD3	0.22762	0.00015244	0.00188711
81578	COL21A1	0.47963	0.000152721	0.00188918
10842	PPP1R17	-0.452582	0.000153235	0.00189414
23640	HSPBP1	-0.214921	0.00015341	0.0018949
2074	ERCC6	-0.300883	0.000154031	0.00190116
85407	NKD1	-0.266816	0.000154928	0.00191082
7450	VWF	0.403199	0.00015613	0.00192422
8707	B3GALT2	-0.332815	0.000156287	0.00192473
11061	LECT1	0.297535	0.000157107	0.0019334
374887	YJEFN3	-0.23387	0.000157274	0.00193403
79962	DNAJC22	0.335586	0.000157909	0.00194041
54454	ATAD2B	0.289766	0.000158676	0.0019484
55109	AGGF1	-0.220122	0.000159107	0.00195225
7314	UBB	-0.190819	0.000159792	0.00195697
4711	NDUFB5	-0.18099	0.000159871	0.00195697
55213	RCBTB1	0.282248	0.000159901	0.00195697
121441	NEDD1	0.251114	0.000159961	0.00195697
1004	CDH6	-0.283893	0.000160174	0.00195814
2328	FMO3	0.346031	0.000160902	0.00196559
27252	KLHL20	0.237165	0.000162202	0.00198003
55450	CAMK2N1	-0.271856	0.000163164	0.00199032
115098	CCDC124	-0.193662	0.000163676	0.00199511
84909	C9orf3	-0.259997	0.000164108	0.00199744
7433	VIPR1	-0.192395	0.000163998	0.00199744
8325	FZD8	-0.402244	0.000164326	0.00199864
5147	PDE6D	-0.16528	0.000166002	0.00201755
84313	VPS25	-0.26533	0.000166308	0.00201981
145438	FRMD6-AS1	0.39921	0.000166503	0.0020207
1298	COL9A2	0.243923	0.000166883	0.00202301
64285	RHBDF1	0.152565	0.000166936	0.00202301
55915	LANCL2	-0.366697	0.000168132	0.00203602
441061	2019-03-11	-0.239203	0.000168947	0.00204441
533	ATP6V0B	-0.230364	0.000169647	0.00205138
114876	OSBPL1A	-0.196963	0.000170567	0.00206102
6594	SMARCA1	0.189627	0.000170993	0.00206467
57728	WDR19	0.262861	0.000171676	0.00207074
84181	CHD6	0.240346	0.000171868	0.00207074
24146	CLDN15	0.116831	0.000171805	0.00207074
115024	NT5C3L	-0.244347	0.00017359	0.00208997
90634	N4BP2L1	0.20755	0.000173801	0.00209101
9232	PTTG1	-0.303676	0.000175315	0.0021077
119692	OR51S1	0.231279	0.000176297	0.00211493
26037	SIPA1L1	0.225505	0.000176044	0.00211493
8226	HDHD1	0.272155	0.000176278	0.00211493
80204	FBXO11	-0.16146	0.000176432	0.00211502
8603	FAM193A	0.184388	0.000176762	0.00211746
64077	LHPP	0.291562	0.000177209	0.0021213
27037	TRMT2A	0.136846	0.000177749	0.00212623
3556	IL1RAP	-0.250634	0.000179203	0.00214086
1297	COL9A1	-0.159051	0.000179348	0.00214086
6665	SOX15	0.176768	0.000179357	0.00214086
84626	KRBA1	0.142816	0.000179512	0.00214117
7529	YWHAB	-0.200915	0.000180663	0.00215146
644538	CXorf69	0.311084	0.000180733	0.00215146
143903	LAYN	0.413985	0.000180891	0.00215146
8853	ASAP2	-0.222642	0.000180805	0.00215146
1462	VCAN	0.298774	0.000181577	0.00215809
90355	C5orf30	-0.289652	0.000182798	0.00217029
57139	RGL3	0.204054	0.000182864	0.00217029
406896	MIR103A2	-0.411126	0.000183574	0.00217717
57231	SNX14	-0.215172	0.000186516	0.00221048
26472	PPP1R14B	0.213322	0.000186809	0.00221238
6390	SDHB	-0.172984	0.000188045	0.00222544
3823	KLRC3	-0.683455	0.000188739	0.00223049
468	ATF4	-0.19718	0.00018873	0.00223049
37	ACADVL	0.23682	0.000189595	0.00223744
80059	LRRTM4	-0.30307	0.000189566	0.00223744
5256	PHKA2	0.144222	0.000189868	0.00223907
10486	CAP2	-0.277518	0.000190129	0.00224057
126567	C2CD4C	-0.320354	0.000190451	0.00224188
7057	THBS1	-0.592718	0.00019051	0.00224188
5187	PER1	0.302006	0.000193902	0.0022802
2786	GNG4	-0.192045	0.0001943	0.00228166
387694	SH2D4B	-0.296416	0.000194188	0.00228166
79568	C2orf47	-0.224792	0.000195256	0.00229127
22878	TRAPPC8	-0.245471	0.000197272	0.00231329
64096	GFRA4	0.230545	0.000197916	0.00231922
81	ACTN4	0.148563	0.000198098	0.00231972
220906	LOC220906	0.133554	0.000198265	0.00232005
5127	CDK16	-0.119674	0.000199315	0.0023307
5305	PIP4K2A	0.212532	0.000199691	0.00233346
26251	KCNG2	-0.328043	0.000200313	0.00233909
11325	DDX42	0.279899	0.000201365	0.00234808
64377	CHST8	-0.353612	0.00020125	0.00234808
9053	MAP7	0.26151	0.00020186	0.00235222
114819	CROCCP3	0.296195	0.000202496	0.00235797
81611	ANP32E	0.245857	0.000204286	0.00237583
23542	MAPK8IP2	0.138083	0.000204314	0.00237583
252995	FNDC5	-0.244934	0.000204846	0.00238035
1057	CELP	0.184291	0.00020505	0.00238107
342850	ANKRD62	0.487544	0.000205664	0.00238322
64219	PJA1	-0.230458	0.000205551	0.00238322
84640	USP38	-0.241053	0.000205443	0.00238322
89932	PAPLN	0.482064	0.000205931	0.00238465
11320	MGAT4A	-0.245401	0.00020655	0.00239016
10647	SCGB1D2	0.539657	0.000206766	0.002391
148641	SLC35F3	-0.263153	0.000207973	0.00240329
5872	RAB13	0.216675	0.00020918	0.00241556
54972	TMEM132A	-0.252613	0.000209944	0.00242271
27106	ARRDC2	0.313929	0.000210138	0.00242327
285855	RPL7L1	-0.290903	0.000210731	0.00242843
23189	KANK1	0.218568	0.000210882	0.00242849
144423	GLT1D1	-0.22767	0.00021138	0.00243255
1073	CFL2	0.170012	0.000212079	0.0024389
55901	THSD1	-0.238377	0.000212546	0.00244259
10250	SRRM1	0.170747	0.000212706	0.00244275
56990	CDC42SE2	-0.224632	0.000213322	0.00244584
6455	SH3GL1	-0.195793	0.000213415	0.00244584
80195	FAM213A	-0.229429	0.000213223	0.00244584
166336	PRICKLE2	-0.268251	0.000214312	0.00245444
7791	ZYX	0.179123	0.000214935	0.00245987
5149	PDE6H	0.391632	0.000216488	0.00247595
643224	TUBBP5	-0.556056	0.000217468	0.00248545
93986	FOXP2	-0.295208	0.000218722	0.00249808
79078	C1orf50	-0.162226	0.000219293	0.00250288
285286	LOC285286	0.415448	0.000219572	0.00250435
1164	CKS2	-0.345988	0.000220267	0.00251056
441108	C5orf56	0.208646	0.00022169	0.00252505
57104	PNPLA2	0.34241	0.000223257	0.00254116
6863	TAC1	-0.631661	0.000223596	0.00254329
158038	LINGO2	-0.326013	0.000224008	0.00254624
200933	FBXO45	-0.144551	0.000224935	0.00255504
29083	GTPBP8	-0.209423	0.00022537	0.00255754
143884	CWF19L2	0.320414	0.000225462	0.00255754
8128	ST8SIA2	-0.27681	0.000226054	0.00256251
55509	BATF3	-0.441763	0.00022682	0.00256944
324	APC	-0.235755	0.00022716	0.00257155
5126	PCSK2	-0.215649	0.000227959	0.00257709
79645	EFCAB1	-0.834507	0.000227876	0.00257709
1001	CDH3	-0.304794	0.000228748	0.00258426
23405	DICER1	0.200248	0.00022923	0.00258795
79690	GAL3ST4	-0.376435	0.000230707	0.00259795
171392	ZNF675	-0.299188	0.000230739	0.00259795
283807	FBXL22	0.326451	0.000230317	0.00259795
81566	CSRNP2	-0.154459	0.000230572	0.00259795
10242	KCNMB2	-0.215593	0.000231169	0.00260104
56850	GRIPAP1	0.140662	0.000232772	0.00261555
26033	ATRNL1	-0.215707	0.000232726	0.00261555
3021	H3F3B	0.299016	0.000233644	0.00262358
6733	SRPK2	-0.161493	0.000235553	0.00264323
55505	NOP10	-0.305202	0.000236603	0.00265323
83866	TTTY11	0.213635	0.000237522	0.00266174
23256	SCFD1	-0.214028	0.000237855	0.00266368
389332	LOC389332	-0.44497	0.000238094	0.00266457
3590	IL11RA	0.177192	0.000239255	0.00267219
4692	NDN	-0.32364	0.000239102	0.00267219
90134	KCNH7	-0.288932	0.000239118	0.00267219
5423	POLB	-0.237442	0.000239532	0.00267349
4889	NPY5R	-0.257948	0.000242303	0.00270261
7745	ZNF192	-0.36993	0.000243353	0.00271176
2187	FANCB	0.585524	0.000243448	0.00271176
5800	PTPRO	-0.22074	0.000244702	0.0027239
388228	SBK1	-0.2131	0.00024592	0.0027325
5026	P2RX5	-0.236549	0.000245966	0.0027325
63976	PRDM16	0.282014	0.000245768	0.0027325
4628	MYH10	-0.20106	0.000246765	0.00273773
5530	PPP3CA	-0.183003	0.000246754	0.00273773
6624	FSCN1	-0.271786	0.000248624	0.00275652
1122	CHML	-0.367986	0.00025256	0.00279459
100132916	FAM159B	-0.457027	0.000252401	0.00279459
22821	RASA3	0.179401	0.000252279	0.00279459
5300	PIN1	-0.181766	0.000253188	0.00279832
966	CD59	0.247704	0.000253234	0.00279832
51222	ZNF219	0.236441	0.000253643	0.00280099
22936	ELL2	-0.187161	0.000254398	0.00280747
1512	CTSH	0.247022	0.000255536	0.00281817
54913	RPP25	0.161728	0.00025721	0.00283475
57412	AS3MT	0.361513	0.000260363	0.00286761
133690	CAPSL	-0.539674	0.000260951	0.00287219
5252	PHF1	0.114413	0.000261201	0.00287304
10138	YAF2	-0.171162	0.000261743	0.0028771
64901	RANBP17	-0.328609	0.000265525	0.0029165
2553	GABPB1	-0.184642	0.000265677	0.0029165
81553	FAM49A	-0.206663	0.000267339	0.00293282
2775	GNAO1	-0.148107	0.000267789	0.00293582
5105	PCK1	0.592867	0.000268104	0.00293735
157922	CAMSAP1	-0.172845	0.000269222	0.00294766
51195	RAPGEFL1	-0.280197	0.00027365	0.00299221
128866	CHMP4B	-0.229982	0.000273573	0.00299221
79987	SVEP1	0.434506	0.000274159	0.00299581
57619	SHROOM3	-0.302374	0.000275126	0.00300141
1967	EIF2B1	-0.137429	0.000275212	0.00300141
3822	KLRC2	-1.08391	0.000275134	0.00300141
672	BRCA1	0.28313	0.000275488	0.00300246
116179	TGM7	0.280319	0.000275688	0.00300268
6599	SMARCC1	0.223084	0.000278061	0.00302654
2290	FOXG1	-0.163604	0.000279693	0.00304232
253635	CCDC75	0.393272	0.000279992	0.00304359
3312	HSPA8	-0.219253	0.00028166	0.00305973
55240	STEAP3	0.230013	0.000282355	0.00306528
57221	KIAA1244	-0.151546	0.000282544	0.00306534
26260	FBXO25	-0.188973	0.000282766	0.00306575
4760	NEUROD1	0.362764	0.000283484	0.00306955
58157	NGB	0.316411	0.000283485	0.00306955
6696	SPP1	0.539895	0.000284506	0.00307861
22800	RRAS2	-0.188302	0.000285668	0.00308918
91949	COG7	0.213693	0.000287522	0.00310722
2912	GRM2	-0.277549	0.000288565	0.00311341
151258	SLC38A11	0.396716	0.000288656	0.00311341
6402	SELL	0.392423	0.000288402	0.00311341
4008	LMO7	-0.204715	0.000289038	0.00311552
280636	C11orf31	-0.141344	0.000289777	0.00311946
54680	ZNHIT6	0.185853	0.000289594	0.00311946
284001	CCDC57	0.26432	0.000291874	0.00313999
84063	KIRREL2	-0.145456	0.000294834	0.0031698
9578	CDC42BPB	0.435134	0.000295068	0.00317027
5375	PMP2	0.358891	0.000295872	0.00317685
6608	SMO	0.229369	0.000296062	0.00317685
4929	NR4A2	-0.595415	0.000297032	0.00318317
374659	HDDC3	0.178001	0.000296915	0.00318317
55351	STK32B	-0.231581	0.000297677	0.00318803
10314	LANCL1	-0.165362	0.000300054	0.00321143
51256	TBC1D7	-0.239568	0.00030344	0.00324558
126792	B3GALT6	-0.212591	0.000303727	0.00324657
4659	PPP1R12A	0.173672	0.000304318	0.0032508
6574	SLC20A1	0.247044	0.000305145	0.00325694
7455	ZAN	0.17894	0.000305284	0.00325694
125144	C17orf76-AS1	0.220848	0.00030566	0.00325887
114990	VASN	0.389082	0.000307304	0.00327431
53353	LRP1B	-0.270955	0.000308274	0.00328255
6668	SP2	-0.194666	0.000308514	0.003283
1272	CNTN1	-0.256849	0.000309531	0.00329173
9962	SLC23A2	0.17027	0.000310352	0.00329836
8813	DPM1	-0.185602	0.000311117	0.00330228
9525	VPS4B	0.192456	0.000311034	0.00330228
7322	UBE2D2	-0.163588	0.000311683	0.00330618
23546	SYNGR4	-0.138301	0.000312414	0.00330992
9267	CYTH1	0.239465	0.000312433	0.00330992
59350	RXFP1	-0.343072	0.000312652	0.00331014
114794	ELFN2	-0.267168	0.000313479	0.00331679
10048	RANBP9	-0.210277	0.000315163	0.0033325
79893	GGNBP2	0.192303	0.000316436	0.00334384
23654	PLXNB2	0.232621	0.000317022	0.0033479
353143	LCE3B	0.188159	0.000318579	0.00336221
9919	SEC16A	0.216656	0.000318912	0.00336361
9659	PDE4DIP	-0.375677	0.000319119	0.00336366
51441	YTHDF2	-0.148	0.000322038	0.00339228
28951	TRIB2	-0.293746	0.000322574	0.00339579
157627	LOC157627	0.354519	0.000324299	0.00341179
221981	THSD7A	-0.3669	0.000324571	0.0034125
112942	CCDC104	0.182082	0.000326005	0.00342542
7920	ABHD16A	-0.19981	0.000327553	0.00343951
6404	SELPLG	-0.506398	0.000328165	0.00344377
389493	LOC389493	-0.445455	0.000329691	0.00345761
1200	TPP1	0.240868	0.000330468	0.00346358
23	ABCF1	-0.182735	0.000333462	0.00349276
8568	RRP1	0.204832	0.000334785	0.00350442
197258	FUK	0.224105	0.000335461	0.0035071
60680	CELF5	-0.205018	0.000335325	0.0035071
55191	NADSYN1	0.273784	0.000336473	0.00351547
84515	MCM8	0.2589	0.000339526	0.00354514
93082	NEURL3	0.215809	0.000342111	0.0035699
91801	ALKBH8	0.372373	0.000342995	0.00357688
5413	Septin 5	-0.244862	0.000344776	0.00359259
57594	HOMEZ	0.218564	0.000344932	0.00359259
55349	CHDH	0.166124	0.000346291	0.0036045
9603	NFE2L3	-0.28438	0.000348367	0.00362385
310	ANXA7	0.136171	0.000348661	0.00362464
151534	LOC151534	0.13161	0.000353906	0.00367552
1399	CRKL	0.205224	0.000354437	0.00367552
64866	CDCP1	0.151357	0.000354252	0.00367552
1831	TSC22D3	0.241869	0.000354342	0.00367552
79912	PYROXD1	0.249441	0.000354886	0.00367789
84317	CCDC115	0.235137	0.000355517	0.00368214
80755	AARSD1	-0.202504	0.000356286	0.00368781
8834	TMEM11	-0.150305	0.000357168	0.00369236
990	CDC6	-0.393319	0.000357041	0.00369236
26353	HSPB8	0.276229	0.000358355	0.00370234
51569	UFM1	-1.1465	0.000360907	0.00372639
9783	RIMS3	0.258981	0.000361387	0.00372904
220359	TIGD3	0.204676	0.000366344	0.00377552
2246	FGF1	0.188885	0.00036617	0.00377552
3460	IFNGR2	-0.227618	0.000369158	0.00380217
25957	PNISR	0.187326	0.000370194	0.00381048
65062	TMEM237	0.176756	0.000376514	0.00387314
114800	CCDC85A	-0.254356	0.000377471	0.00388059
1848	DUSP6	-0.384224	0.000378113	0.0038848
5050	PAFAH1B3	0.198644	0.000379656	0.00389825
3754	KCNF1	-0.186089	0.000380161	0.00390104
8427	ZNF282	-0.195173	0.000383218	0.00392999
400927	LOC400927	0.243903	0.000383673	0.00393224
283537	SLC46A3	0.255855	0.000384258	0.00393582
55108	BSDC1	0.185929	0.000385722	0.00394838
23118	TAB2	-0.2196	0.000386564	0.00395458
6787	NEK4	0.198311	0.000388673	0.00397371
390928	PAPL	0.347515	0.000389265	0.00397733
11260	XPOT	0.185853	0.000389541	0.0039777
213	ALB	0.448265	0.00039064	0.00398451
1375	CPT1B	0.140251	0.000390685	0.00398451
5168	ENPP2	0.271952	0.000392733	0.00400295
80206	FHOD3	-0.196001	0.000393428	0.00400758
9363	RAB33A	-0.27476	0.000394019	0.00401115
23195	MDN1	0.217951	0.000396263	0.00402818
57060	PCBP4	0.18276	0.000396253	0.00402818
2921	CXCL3	-0.583568	0.000396417	0.00402818
23568	ARL2BP	0.151208	0.000397681	0.00403366
38	ACAT1	0.236177	0.000397277	0.00403366
5594	MAPK1	-0.145959	0.00039751	0.00403366
10123	ARL4C	-0.229133	0.00040057	0.00406049
9736	USP34	0.159511	0.000401656	0.0040674
4709	NDUFB3	-0.189076	0.00040174	0.0040674
6948	TCN2	0.20807	0.000402041	0.00406799
10631	POSTN	-0.339108	0.000403992	0.00408525
222642	TSPO2	0.178638	0.000404886	0.00408933
10694	CCT8	-0.164417	0.000404782	0.00408933
25928	SOSTDC1	0.406261	0.00040616	0.00409723
94234	FOXQ1	-0.421474	0.000406143	0.00409723
65985	AACS	-0.207428	0.000406496	0.00409814
23510	KCTD2	0.204735	0.00040705	0.00410125
10483	SEC23B	-0.218894	0.000408756	0.00411553
6401	SELE	-0.959057	0.000408962	0.00411553
1613	DAPK3	-0.283426	0.00040982	0.00412168
6855	SYP	-0.296024	0.00041131	0.00413168
160777	CCDC60	0.199988	0.000411265	0.00413168
283951	C16orf91	-0.225281	0.00041158	0.00413191
2259	FGF14	-0.178079	0.000412274	0.00413548
902	CCNH	-0.18666	0.000412432	0.00413548
221443	C6orf130	0.17079	0.000414926	0.00415799
5094	PCBP2	0.156006	0.000417076	0.00417393
1852	DUSP9	0.406751	0.000417268	0.00417393
761	CA3	0.358314	0.000417226	0.00417393
1837	DTNA	0.195766	0.000417571	0.00417445
6921	TCEB1	-0.256201	0.000419547	0.0041917
4607	MYBPC3	-0.141315	0.000421032	0.00420402
254552	NUDT8	0.240379	0.000421695	0.00420812
115362	GBP5	0.291563	0.000423254	0.00422077
27128	CYTH4	-0.353771	0.00042347	0.00422077
26146	TRAF3IP1	0.252097	0.000425493	0.00423392
10808	HSPH1	-0.198828	0.000425292	0.00423392
100272147	MTCP1NB	0.27928	0.000425702	0.00423392
11247	NXPH4	-0.394886	0.000425804	0.00423392
51809	GALNT7	-0.242134	0.000429569	0.00426881
7307	U2AF1	0.186557	0.000431092	0.00427885
84942	WDR73	-0.185837	0.000430856	0.00427885
2107	ETF1	-0.164626	0.000431994	0.00428525
889	KRIT1	0.167732	0.000432979	0.00429246
5443	POMC	-0.613125	0.00043416	0.00430142
845	CASQ2	0.394974	0.000434398	0.00430142
6539	SLC6A12	0.349371	0.000434804	0.00430288
3093	UBE2K	-0.160016	0.000435634	0.00430854
54457	TAF7L	-0.379542	0.000437393	0.00432102
857	CAV1	0.434767	0.000437414	0.00432102
114823	LENG8	0.19699	0.000438696	0.00433112
5973	RENBP	0.213764	0.000440353	0.0043449
56650	CLDND1	0.330529	0.000440678	0.00434554
5067	CNTN3	-0.202422	0.000441346	0.00434956
121838	LINC00284	-0.37547	0.000442278	0.00435617
51729	WBP11	-0.183052	0.000444685	0.0043747
283687	C15orf37	-0.137567	0.000444588	0.0043747
64094	SMOC2	0.425525	0.000446267	0.00438768
10565	ARFGEF1	-0.184496	0.000446796	0.00439029
118487	CHCHD1	-0.163346	0.00044898	0.00440747
2941	GSTA4	-0.141058	0.000449073	0.00440747
90488	C12orf23	-0.199648	0.000449485	0.00440891
339390	CLEC4G	-0.298806	0.000450581	0.00441707
5830	PEX5	-0.167111	0.000451611	0.00442457
51128	SAR1B	-0.256749	0.000453246	0.00443798
130916	MTERFD2	0.215276	0.000455297	0.00445545
54898	ELOVL2	-0.283951	0.000456544	0.00446241
203859	ANO5	0.252937	0.000456513	0.00446241
353324	SPATA12	0.262621	0.000457485	0.00446732
144699	FBXL14	0.244668	0.000457582	0.00446732
28511	NKIRAS2	-0.185756	0.000458105	0.00446981
157285	SGK223	-0.298061	0.000460201	0.00448763
79925	SPEF2	0.14083	0.000463056	0.00451283
150677	OTOS	0.307627	0.000463796	0.00451741
10598	AHSA1	-0.233434	0.000465695	0.00453326
1736	DKC1	0.184265	0.000470561	0.00457795
91107	TRIM47	0.312951	0.00047419	0.00461056
55345	C4orf21	0.370868	0.000474759	0.00461072
23158	TBC1D9	-0.260132	0.000474536	0.00461072
140739	UBE2F	-0.186057	0.000478609	0.00464541
116832	RPL39L	-0.285162	0.00048198	0.00467482
84309	NUDT16L1	-0.180216	0.0004822	0.00467482
114826	SMYD4	0.304257	0.000482806	0.00467593
28970	C11orf54	0.262761	0.000483156	0.00467593
645166	LOC645166	-0.287604	0.000482916	0.00467593
25832	NBPF14	0.319061	0.000487223	0.00471255
23526	HMHA1	-0.299064	0.0004889	0.00472603
6662	SOX9	0.313248	0.000489751	0.00473152
2554	GABRA1	-0.240434	0.000494157	0.00476717
23293	SMG6	0.251315	0.000494299	0.00476717
4704	NDUFA9	-0.152775	0.000493737	0.00476717
3572	IL6ST	0.348977	0.000496996	0.00478631
56893	UBQLN4	0.206774	0.000497112	0.00478631
10461	MERTK	-0.303082	0.000497719	0.00478631
27020	NPTN	-0.209197	0.00049729	0.00478631
7644	ZNF91	-0.262491	0.00049756	0.00478631
10577	NPC2	0.240186	0.000498422	0.00479031
7873	MANF	-0.286002	0.000502993	0.00483146
375567	VWC2	-0.243276	0.000505779	0.00485542
9495	AKAP5	-0.622827	0.000508469	0.00487844
10165	SLC25A13	0.177137	0.000509451	0.00488224
839	CASP6	0.245838	0.000509351	0.00488224
100302736	TMED7-TICAM2	0.256064	0.000511044	0.00488907
10398	MYL9	0.337139	0.000510462	0.00488907
5170	PDPK1	0.327608	0.000510982	0.00488907
6323	SCN1A	0.317408	0.000511589	0.00489148
51286	CEND1	0.159799	0.000512232	0.00489482
29099	COMMD9	-0.20948	0.000512796	0.00489526
6645	SNTB2	-0.192124	0.000512865	0.00489526
56674	TMEM9B	-0.159752	0.000513262	0.00489625
152573	SHISA3	0.747417	0.000516869	0.00492784
65997	RASL11B	-0.381253	0.000517275	0.00492889
7052	TGM2	0.16195	0.000517597	0.00492914
26127	FGFR1OP2	0.198265	0.000518469	0.00493463
10841	FTCD	0.247667	0.000519406	0.00494073
83871	RAB34	0.214213	0.000522005	0.00496262
10434	LYPLA1	-0.201584	0.000522704	0.00496643
51052	PRLH	-0.202457	0.00052371	0.00497316
4087	SMAD2	-0.149569	0.000526446	0.00499629
10494	STK25	-0.167987	0.000528101	0.00500915
146760	RTN4RL1	-0.146486	0.000530196	0.00502616
340784	HMX3	0.202525	0.000531572	0.00503635
55924	FAM212B	-0.17674	0.000531989	0.00503743
57020	C16orf62	0.171125	0.00053561	0.00506884
5055	SERPINB2	-0.420103	0.000537667	0.00508542
92815	HIST3H2A	-0.277137	0.00053814	0.00508701
51306	FAM13B	0.246181	0.00053915	0.00509367
51295	ECSIT	-0.157889	0.000539698	0.00509596
6309	SC5DL	-0.233523	0.00054068	0.00509945
3931	LCAT	0.249206	0.000540487	0.00509945
4893	NRAS	-0.237146	0.000541539	0.00510467
51375	SNX7	-0.157102	0.000543056	0.00511608
7321	UBE2D1	-0.191467	0.000545802	0.00513904
80741	LY6G5C	0.211525	0.000546637	0.005144
7067	THRA	0.174675	0.00054713	0.00514573
4199	ME1	-0.279845	0.000548298	0.00515382
84253	GARNL3	-0.243465	0.000551799	0.0051838
27173	SLC39A1	0.211518	0.000553949	0.00520107
55343	SLC35C1	-0.206935	0.000554596	0.00520421
128434	VSTM2L	-0.25856	0.000555348	0.00520834
84140	FAM161A	0.298344	0.000557047	0.00522134
80232	WDR26	-0.176974	0.000560131	0.0052414
158	ADSL	-0.142699	0.000559874	0.0052414
10325	RRAGB	-0.17861	0.000559769	0.0052414
9465	AKAP7	0.281774	0.000563238	0.00526752
146691	TOM1L2	0.220441	0.000566035	0.00529071
4868	NPHS1	0.181627	0.000566942	0.00529622
8842	PROM1	-0.447826	0.000568483	0.00530764
5426	POLE	0.287922	0.000571142	0.00532352
8073	PTP4A2	0.190927	0.000570818	0.00532352
57626	KLHL1	-0.250656	0.000571071	0.00532352
1434	CSE1L	-0.132927	0.000571517	0.00532405
3113	HLA-DPA1	0.377175	0.000574664	0.0053495
23524	SRRM2	0.240081	0.000574891	0.0053495
148109	FAM187B	-0.278457	0.000576539	0.00536185
79369	B3GNT4	-0.212625	0.000577594	0.00536866
127829	ARL8A	0.140748	0.000579756	0.00538575
142679	DUSP19	-0.237626	0.000580143	0.00538635
5310	PKD1	0.211668	0.000581817	0.0053987
6016	RIT1	-0.203688	0.000582121	0.0053987
7082	TJP1	0.156314	0.000583683	0.00541018
1632	ECI1	0.182006	0.000584432	0.00541412
201163	FLCN	0.120107	0.000587254	0.00543723
3872	KRT17	-0.451906	0.000590117	0.00546071
22986	SORCS3	-0.257524	0.000592123	0.00547623
9223	MAGI1	-0.182161	0.000592853	0.00547995
113452	TMEM54	0.227682	0.000593672	0.00548448
54345	SOX18	-0.539422	0.000594304	0.00548727
135656	DPCR1	0.222199	0.00059551	0.00549537
139886	SPIN4	-0.249653	0.000597493	0.00551062
132	ADK	-0.125448	0.000598833	0.00551993
4720	NDUFS2	-0.152786	0.000599543	0.00552342
55937	APOM	0.226437	0.00060251	0.00554769
51649	MRPS23	-0.225081	0.000605082	0.00555613
55616	ASAP3	0.339879	0.000604122	0.00555613
390275	OR8A1	-0.196628	0.00060459	0.00555613
23170	TTLL12	0.207523	0.000604034	0.00555613
55683	KANSL3	0.14927	0.000605093	0.00555613
9411	ARHGAP29	-0.443482	0.000606516	0.00556613
84216	TMEM117	-0.270801	0.000607122	0.00556862
5719	PSMD13	-0.298606	0.000609043	0.00558317
6710	SPTB	0.190365	0.000609448	0.00558381
9705	ST18	0.348952	0.000609999	0.00558579
23087	TRIM35	0.167295	0.00061196	0.00560068
30815	ST6GALNAC6	-0.173698	0.00061317	0.00560867
80063	ATF7IP2	-0.218244	0.000615184	0.00562401
29953	TRHDE	-0.297567	0.000616708	0.00563486
91748	C14orf43	0.268618	0.00061875	0.00565042
22881	ANKRD6	-0.230299	0.000620193	0.00565739
4821	NKX2-2	0.266873	0.000619933	0.00565739
23119	HIC2	0.167812	0.000620762	0.00565813
11234	HPS5	0.240948	0.000620952	0.00565813
284611	FAM102B	-0.258686	0.00062387	0.00568161
8659	ALDH4A1	0.316413	0.000628652	0.00572204
11159	RABL2A	0.152998	0.000629087	0.00572287
154215	NKAIN2	-0.240515	0.000631324	0.00574009
10140	TOB1	0.322086	0.000631984	0.00574296
8871	SYNJ2	0.230765	0.000632929	0.00574842
11282	MGAT4B	-0.158743	0.0006339	0.00574996
339456	TMEM52	-0.120692	0.000634134	0.00574996
373156	GSTK1	0.148814	0.000633456	0.00574996
79818	ZNF552	-0.229784	0.000639366	0.00579425
340419	RSPO2	0.306953	0.00064057	0.00580202
3778	KCNMA1	-0.140938	0.000642088	0.0058126
84722	PSRC1	0.288467	0.000642841	0.00581627
57162	PELI1	-0.184744	0.000643923	0.00582289
57528	KCTD16	-0.230718	0.000644294	0.00582309
55695	NSUN5	0.266414	0.000644667	0.00582331
25896	INTS7	-0.220637	0.000645138	0.00582411
3782	KCNN3	0.189879	0.000645455	0.00582411
146713	RBFOX3	-0.211337	0.000647007	0.00583496
7407	VARS	0.205642	0.000649337	0.00585281
729970	LOC729970	0.23049	0.00065027	0.00585805
146	ADRA1D	-0.304821	0.000652025	0.00586616
9956	HS3ST2	-0.290238	0.000651968	0.00586616
2099	ESR1	-0.194926	0.000652226	0.00586616
66000	TMEM108	-0.181817	0.000653565	0.00587188
196527	ANO6	0.188045	0.000653488	0.00587188
7504	XK	0.230392	0.000658758	0.00591534
64218	SEMA4A	-0.280903	0.000659468	0.00591853
55832	CAND1	-0.196908	0.000664389	0.00595949
79133	C20orf7	-0.138611	0.000664856	0.00596047
9880	ZBTB39	0.197023	0.00066621	0.0059694
9037	SEMA5A	-0.368132	0.000666607	0.00596975
55110	MAGOHB	-0.262556	0.000667682	0.00597617
646851	LOC646851	0.327843	0.00067003	0.00599397
7164	TPD52L1	0.247696	0.000672608	0.0060138
158471	PRUNE2	0.241603	0.000673859	0.00602176
1355	COX15	0.175743	0.000676537	0.00604245
8896	BUD31	-0.201796	0.000679287	0.00606377
9746	CLSTN3	-0.228267	0.000679669	0.00606393
10039	PARP3	0.209109	0.000680829	0.00607103
388722	C1orf53	-0.265995	0.000683075	0.00608455
51491	NOP16	-0.231332	0.000682845	0.00608455
57106	NAT14	-0.244604	0.000685579	0.00610359
284106	CISD3	0.115702	0.000687905	0.00611857
1910	EDNRB	-0.326697	0.000687995	0.00611857
23620	NTSR2	0.321607	0.00068966	0.0061301
4123	MAN2C1	0.157161	0.000693294	0.00615913
22996	TTC39A	0.298632	0.000693808	0.00616041
339768	ESPNL	-0.290437	0.000694946	0.00616723
27065	D4S234E	0.185589	0.000697109	0.00618313
440854	CAPN14	-0.266156	0.000698683	0.0061938
8787	RGS9	0.276057	0.0007003	0.00620484
54737	MPHOSPH8	0.195378	0.000702249	0.00621881
192111	PGAM5	-0.320801	0.000702659	0.00621913
1961	EGR4	-0.428683	0.000703671	0.00622479
9478	CABP1	0.191888	0.000704183	0.00622601
5636	PRPSAP2	-0.193533	0.000704857	0.00622867
10468	FST	-0.258847	0.000707434	0.00624813
117583	PARD3B	0.185753	0.000710977	0.0062761
11140	CDC37	0.122777	0.000711895	0.00627885
54587	MXRA8	0.160568	0.000712419	0.00627885
645323	LINC00461	-0.279167	0.000712042	0.00627885
158435	LOC158435	0.20576	0.000713084	0.0062814
28513	CDH19	0.333768	0.000715332	0.00629786
10109	ARPC2	-0.236009	0.000720749	0.00634221
51100	SH3GLB1	-0.164173	0.00072168	0.00634705
55777	MBD5	-0.208329	0.000723526	0.00635667
1114	CHGB	-0.238263	0.000723641	0.00635667
57562	KIAA1377	-0.255295	0.000723917	0.00635667
57343	ZNF304	0.359802	0.00072515	0.00636415
488	ATP2A2	-0.191135	0.000727095	0.00637786
390927	ZNF793	-0.19375	0.000727764	0.00638037
374977	HEATR8	0.270914	0.000733972	0.00643076
8357	HIST1H3H	-0.434909	0.000734283	0.00643076
5604	MAP2K1	-0.252446	0.000735007	0.00643372
3290	HSD11B1	0.422103	0.000735587	0.00643542
375444	C5orf34	-0.260623	0.000739485	0.00646613
25972	UNC50	-0.197776	0.000740496	0.00647157
168374	ZNF92	-0.212881	0.000741086	0.00647334
284233	CYP4F35P	0.181309	0.000741876	0.00647685
221143	N6AMT2	0.18355	0.000742558	0.00647941
79602	ADIPOR2	0.263774	0.000745165	0.00649876
92086	GGTLC1	0.171139	0.000747707	0.00651752
2645	GCK	-0.165114	0.000761443	0.00663378
60412	EXOC4	-0.216583	0.000763362	0.00664603
51114	ZDHHC9	-0.246571	0.000763645	0.00664603
6734	SRPR	0.177497	0.000765188	0.00665598
79693	YRDC	-0.259215	0.000765614	0.00665621
150967	PKI55	0.273533	0.00077282	0.00671536
55282	LRRC36	-0.303941	0.000773928	0.00672148
50515	CHST11	-0.360377	0.000775171	0.00672878
5502	PPP1R1A	-0.24972	0.000775893	0.00673153
92703	TMEM183A	-0.157239	0.000780797	0.00677056
10778	ZNF271	-0.208176	0.000782022	0.00677766
64216	TFB2M	-0.160624	0.000782482	0.00677812
7750	ZMYM2	-0.158329	0.000783775	0.0067858
8905	AP1S2	0.20573	0.000786418	0.00680515
9311	ACCN3	0.150054	0.000787194	0.00680833
63933	CCDC90A	0.185547	0.000789096	0.00682124
91289	LMF2	0.137625	0.000792124	0.00684387
58526	MID1IP1	0.263744	0.000794421	0.00686016
8658	TNKS	0.216242	0.000799828	0.00690328
220064	ORAOV1	0.174674	0.000804212	0.00693753
55651	NHP2	-0.214322	0.000805581	0.00694574
130162	C2orf63	0.255243	0.00080733	0.00695723
5687	PSMA6	-0.147242	0.000807813	0.00695779
221302	ZUFSP	-0.221365	0.000809327	0.00696596
56647	BCCIP	-0.181534	0.000809597	0.00696596
22864	R3HDM2	0.227136	0.00081067	0.006968
126353	C19orf21	-0.147475	0.00081047	0.006968
3420	IDH3B	-0.126195	0.00081415	0.00699431
3177	SLC29A2	0.134476	0.000814685	0.0069953
4303	FOXO4	0.228167	0.000816995	0.00700792
91966	CXorf40A	-0.180658	0.000816704	0.00700792
7162	TPBG	-0.470136	0.00082477	0.00707097
256356	GK5	0.375626	0.000825345	0.00707226
7867	MAPKAPK3	0.18338	0.000826637	0.0070797
222235	FBXL13	0.257243	0.000829211	0.00709809
54961	SSH3	0.137439	0.00083184	0.00711695
55266	TMEM19	-0.166373	0.000832415	0.00711717
3712	IVD	0.225016	0.000832719	0.00711717
157247	MGC27345	0.221775	0.000835881	0.00714053
64208	POPDC3	0.283081	0.000837917	0.00715426
146433	IL34	-0.193269	0.000840339	0.00717127
4775	NFATC3	0.172322	0.000841653	0.0071788
4498	MT1JP	0.365052	0.000845474	0.00720403
390264	OR10G4	0.188924	0.00084544	0.00720403
5414	Septin 4	0.196762	0.000848221	0.00722005
84818	IL17RC	0.1244	0.000848169	0.00722005
5796	PTPRK	0.173133	0.000851008	0.00724008
6423	SFRP2	0.458415	0.000852381	0.00724806
124404	Septin 12	0.411831	0.000854511	0.00726007
85444	LRRCC1	0.35764	0.000855067	0.00726007
283373	ANKRD52	-0.233726	0.000855099	0.00726007
9755	TBKBP1	0.225176	0.000855577	0.00726043
55765	C1orf106	-0.160302	0.000856461	0.00726424
9882	TBC1D4	0.209449	0.000866046	0.00733713
201158	FAM18B2	0.291669	0.000866375	0.00733713
9885	OSBPL2	0.124511	0.000865552	0.00733713
132332	TMEM155	-0.474185	0.000867015	0.00733882
1908	EDN3	-0.381277	0.000869608	0.00735703
9213	XPR1	-0.184111	0.000874231	0.00739239
79699	ZYG11B	-0.224987	0.000874786	0.00739334
9689	BZW1	-0.222954	0.000877422	0.00740436
10618	TGOLN2	0.146886	0.000877028	0.00740436
79781	IQCA1	0.437576	0.000877207	0.00740436
53829	P2RY13	-0.326824	0.000884657	0.00746163
84128	WDR75	0.186827	0.000887845	0.00748474
83641	FAM107B	0.260557	0.000889033	0.00749097
6676	SPAG4	0.211581	0.000894041	0.00752936
79960	PHF17	0.129273	0.00089456	0.00752993
8532	CPZ	-0.263935	0.000896844	0.00754535
10752	CHL1	-0.236899	0.000897989	0.00755117
341883	LRRC9	0.266746	0.000899901	0.00756343
29127	RACGAP1	-0.141864	0.0009011	0.00756432
8915	BCL10	-0.212813	0.000901148	0.00756432
27236	ARFIP1	0.206225	0.000901367	0.00756432
8237	USP11	0.182516	0.000910402	0.00763629
10001	MED6	-0.182301	0.00091594	0.00767888
282566	LINC00515	0.307052	0.000919228	0.00770258
56257	MEPCE	0.154393	0.000923174	0.00772788
6621	SNAPC4	0.169866	0.000922882	0.00772788
2832	NPBWR2	0.17537	0.000927404	0.00775939
83877	TM2D2	-0.207797	0.00092864	0.00776583
203	AK1	0.197355	0.000930279	0.00777423
8997	KALRN	-0.146773	0.000930577	0.00777423
706	TSPO	0.170307	0.000937309	0.00782656
56648	EIF5A2	0.364031	0.000939397	0.00784006
221294	NT5DC1	0.259079	0.000940636	0.00784648
[truncated: 14,676 more rows]
