# Supplementary material for: The variability of expression of many genes and most functional pathways is observed to increase with age in brain transcriptome data
Source: bioRxiv preprint, doi:10.1101/526491, version 1 (2019-01-22)
Supplement: Supplemental Table 2 [file 526491_file04.xlsx]

## Sheet: regression
ID	Description	setSize	enrichmentScore	NES	correction	p.value	p.adjust	qvalues
GO:0051953	negative regulation of amine transport	21	-0.764108	-2.24183	regression	2.10529e-06	0.000790417	0.000700113
GO:0007215	glutamate receptor signaling pathway	79	-0.530775	-2.07643	regression	2.21782e-06	0.000790417	0.000700113
GO:0007218	neuropeptide signaling pathway	84	-0.581833	-2.30092	regression	2.22468e-06	0.000790417	0.000700113
GO:0035249	synaptic transmission, glutamatergic	87	-0.543947	-2.16422	regression	2.23011e-06	0.000790417	0.000700113
GO:0007613	memory	104	-0.548575	-2.24845	regression	2.25411e-06	0.000790417	0.000700113
GO:0007612	learning	124	-0.512991	-2.16179	regression	2.27678e-06	0.000790417	0.000700113
GO:0050806	positive regulation of synaptic transmission	139	-0.511306	-2.19092	regression	2.29704e-06	0.000790417	0.000700113
GO:0048167	regulation of synaptic plasticity	158	-0.467091	-2.03832	regression	2.31874e-06	0.000790417	0.000700113
GO:0017157	regulation of exocytosis	162	-0.448112	-1.96205	regression	2.32386e-06	0.000790417	0.000700113
GO:0007611	learning or memory	214	-0.497458	-2.2578	regression	2.38e-06	0.000790417	0.000700113
GO:0050890	cognition	244	-0.466738	-2.15243	regression	2.40891e-06	0.000790417	0.000700113
GO:0046879	hormone secretion	274	-0.369739	-1.72728	regression	2.44072e-06	0.000790417	0.000700113
GO:0050808	synapse organization	274	-0.381366	-1.7816	regression	2.44072e-06	0.000790417	0.000700113
GO:0009914	hormone transport	284	-0.373329	-1.75068	regression	2.45236e-06	0.000790417	0.000700113
GO:0019932	second-messenger-mediated signaling	289	-0.357119	-1.67794	regression	2.45575e-06	0.000790417	0.000700113
GO:0050804	modulation of chemical synaptic transmission	311	-0.448618	-2.12464	regression	2.47647e-06	0.000790417	0.000700113
GO:0099177	regulation of trans-synaptic signaling	311	-0.448618	-2.12464	regression	2.47647e-06	0.000790417	0.000700113
GO:0023061	signal release	389	-0.369748	-1.79025	regression	2.54704e-06	0.000790417	0.000700113
GO:0010469	regulation of signaling receptor activity	424	-0.428185	-2.08933	regression	2.57951e-06	0.000790417	0.000700113
GO:0072224	metanephric glomerulus development	12	-0.864616	-2.18445	regression	4.14603e-06	0.0010666	0.000944745
GO:0051966	regulation of synaptic transmission, glutamatergic	64	-0.566796	-2.13281	regression	4.39057e-06	0.0010666	0.000944745
GO:0072347	response to anesthetic	65	-0.56848	-2.14541	regression	4.39526e-06	0.0010666	0.000944745
GO:1903305	regulation of regulated secretory pathway	107	-0.494667	-2.03744	regression	4.50977e-06	0.0010666	0.000944745
GO:0007416	synapse assembly	134	-0.456898	-1.94785	regression	4.58005e-06	0.0010666	0.000944745
GO:0019935	cyclic-nucleotide-mediated signaling	134	-0.45087	-1.92215	regression	4.58005e-06	0.0010666	0.000944745
GO:0010817	regulation of hormone levels	440	-0.332629	-1.62854	regression	5.18675e-06	0.00116143	0.00102874
GO:0061687	detoxification of inorganic compound	12	0.858023	2.13763	regression	5.79584e-06	0.00124975	0.00110697
GO:0060078	regulation of postsynaptic membrane potential	116	-0.470644	-1.96315	regression	6.80252e-06	0.00141444	0.00125284
GO:0010273	detoxification of copper ion	10	0.893284	2.11794	regression	7.74292e-06	0.00150264	0.00133097
GO:1990169	stress response to copper ion	10	0.893284	2.11794	regression	7.74292e-06	0.00150264	0.00133097
GO:0060291	long-term synaptic potentiation	68	-0.533237	-2.02946	regression	1.10069e-05	0.00206717	0.001831
GO:0050803	regulation of synapse structure or activity	158	-0.427655	-1.86622	regression	1.39124e-05	0.0024903	0.00220578
GO:0007187	G-protein coupled receptor signaling pathway, coupled to cyclic nucleotide second messenger	189	-0.396777	-1.77321	regression	1.41154e-05	0.0024903	0.00220578
GO:0019933	cAMP-mediated signaling	124	-0.446431	-1.8813	regression	1.59375e-05	0.00268291	0.00237639
GO:0050807	regulation of synapse organization	147	-0.433858	-1.87425	regression	1.61288e-05	0.00268291	0.00237639
GO:0070098	chemokine-mediated signaling pathway	60	-0.551117	-2.04838	regression	1.96745e-05	0.0031818	0.00281828
GO:0099565	chemical synaptic transmission, postsynaptic	111	-0.45685	-1.8926	regression	2.26129e-05	0.00355817	0.00315166
GO:0033555	multicellular organismal response to stress	60	-0.542847	-2.01764	regression	2.62326e-05	0.00401573	0.00355694
GO:0060079	excitatory postsynaptic potential	95	-0.47515	-1.91884	regression	2.69003e-05	0.00401573	0.00355694
GO:0006816	calcium ion transport	357	-0.327311	-1.5719	regression	2.77019e-05	0.00403202	0.00357136
GO:0006874	cellular calcium ion homeostasis	357	-0.325272	-1.56211	regression	3.02203e-05	0.00429128	0.00380101
GO:0060359	response to ammonium ion	106	-0.456342	-1.87651	regression	3.6082e-05	0.00500165	0.00443021
GO:0030802	regulation of cyclic nucleotide biosynthetic process	64	-0.525045	-1.9757	regression	4.39057e-05	0.00583169	0.00516543
GO:0019233	sensory perception of pain	79	-0.493233	-1.92956	regression	4.43563e-05	0.00583169	0.00516543
GO:0098815	modulation of excitatory postsynaptic potential	38	-0.615411	-2.07975	regression	4.50749e-05	0.00583169	0.00516543
GO:0002237	response to molecule of bacterial origin	291	-0.342054	-1.60856	regression	4.66707e-05	0.00590688	0.00523203
GO:0009617	response to bacterium	425	-0.313702	-1.53101	regression	4.90286e-05	0.00607329	0.00537942
GO:0030595	leukocyte chemotaxis	151	-0.409926	-1.77776	regression	5.07948e-05	0.00616099	0.0054571
GO:0051965	positive regulation of synapse assembly	58	-0.536007	-1.97868	regression	6.1122e-05	0.00726229	0.00643258
GO:0030072	peptide hormone secretion	220	-0.366577	-1.66958	regression	6.92063e-05	0.00803433	0.00711642
GO:0003013	circulatory system process	458	-0.304709	-1.49718	regression	7.03798e-05	0.00803433	0.00711642
GO:0060326	cell chemotaxis	208	-0.37185	-1.68187	regression	7.58921e-05	0.00839282	0.00743395
GO:0055074	calcium ion homeostasis	367	-0.318773	-1.53511	regression	7.83527e-05	0.00839282	0.00743395
GO:0050900	leukocyte migration	327	-0.327444	-1.55889	regression	7.96912e-05	0.00839282	0.00743395
GO:0044706	multi-multicellular organism process	192	-0.37787	-1.69243	regression	8.00563e-05	0.00839282	0.00743395
GO:0008015	blood circulation	454	-0.304178	-1.4934	regression	8.07279e-05	0.00839282	0.00743395
GO:0044057	regulation of system process	446	-0.304551	-1.49285	regression	8.83399e-05	0.00902307	0.00799219
GO:0032496	response to lipopolysaccharide	278	-0.340057	-1.59088	regression	9.53769e-05	0.00957387	0.00848006
GO:0008217	regulation of blood pressure	154	-0.399036	-1.73524	regression	9.94332e-05	0.00981187	0.00869087
GO:0097529	myeloid leukocyte migration	128	-0.421396	-1.78431	regression	0.000104995	0.0100904	0.00893762
GO:1903307	positive regulation of regulated secretory pathway	44	-0.574907	-2.00611	regression	0.000105723	0.0100904	0.00893762
GO:0034765	regulation of ion transmembrane transport	391	-0.311826	-1.51057	regression	0.000109552	0.0102873	0.00911201
GO:1990266	neutrophil migration	67	-0.502423	-1.90675	regression	0.000114431	0.0105749	0.00936674
GO:0009187	cyclic nucleotide metabolic process	124	-0.422095	-1.77875	regression	0.000132053	0.0119318	0.0105686
GO:0030593	neutrophil chemotaxis	59	-0.518688	-1.92147	regression	0.000133213	0.0119318	0.0105686
GO:0051963	regulation of synapse assembly	76	-0.483336	-1.87771	regression	0.000137205	0.012029	0.0106547
GO:0034762	regulation of transmembrane transport	463	-0.297604	-1.46366	regression	0.00013843	0.012029	0.0106547
GO:0098742	cell-cell adhesion via plasma-membrane adhesion molecules	199	-0.365208	-1.64278	regression	0.000141724	0.0121341	0.0107478
GO:0007188	adenylate cyclase-modulating G-protein coupled receptor signaling pathway	160	-0.389527	-1.70272	regression	0.000143892	0.0121412	0.0107541
GO:0051480	regulation of cytosolic calcium ion concentration	272	-0.337376	-1.57462	regression	0.00014889	0.0123834	0.0109686
GO:0046883	regulation of hormone secretion	234	-0.350486	-1.60828	regression	0.000155965	0.0127892	0.011328
GO:0043279	response to alkaloid	98	-0.445936	-1.81045	regression	0.000161574	0.0130651	0.0115724
GO:0030900	forebrain development	332	-0.319638	-1.52404	regression	0.000169597	0.0133796	0.011851
GO:0051705	multi-organism behavior	58	-0.515384	-1.90255	regression	0.000170269	0.0133796	0.011851
GO:0098754	detoxification	101	0.453736	1.80087	regression	0.000172787	0.0133796	0.011851
GO:0042220	response to cocaine	43	-0.568656	-1.97435	regression	0.000174657	0.0133796	0.011851
GO:0050865	regulation of cell activation	434	-0.301413	-1.47394	regression	0.000178517	0.0134977	0.0119556
GO:0017158	regulation of calcium ion-dependent exocytosis	67	-0.495051	-1.87877	regression	0.000189252	0.0141259	0.0125121
GO:0051962	positive regulation of nervous system development	443	-0.29913	-1.46544	regression	0.00019987	0.0147296	0.0130468
GO:0001964	startle response	22	-0.684755	-2.03297	regression	0.000204403	0.0148755	0.0131759
GO:0002886	regulation of myeloid leukocyte mediated immunity	39	-0.582466	-1.97954	regression	0.00022773	0.0163684	0.0144984
GO:0001963	synaptic transmission, dopaminergic	27	-0.647213	-2.02005	regression	0.000248425	0.0172694	0.0152964
GO:0002687	positive regulation of leukocyte migration	97	-0.440025	-1.78322	regression	0.000253617	0.0172694	0.0152964
GO:0002548	monocyte chemotaxis	40	-0.573634	-1.96052	regression	0.000255798	0.0172694	0.0152964
GO:0007585	respiratory gaseous exchange	56	-0.514779	-1.88751	regression	0.000257065	0.0172694	0.0152964
GO:0070838	divalent metal ion transport	393	-0.303775	-1.47228	regression	0.000257524	0.0172694	0.0152964
GO:0007189	adenylate cyclase-activating G-protein coupled receptor signaling pathway	84	-0.457264	-1.8083	regression	0.000258063	0.0172694	0.0152964
GO:0008306	associative learning	62	-0.500928	-1.87347	regression	0.000262898	0.0173931	0.015406
GO:0051339	regulation of lyase activity	44	-0.554844	-1.9361	regression	0.000274016	0.0179249	0.015877
GO:0072511	divalent inorganic cation transport	397	-0.302038	-1.46513	regression	0.000288683	0.0186746	0.016541
GO:0098693	regulation of synaptic vesicle cycle	41	-0.565816	-1.94431	regression	0.000292648	0.0187048	0.0165678
GO:0002279	mast cell activation involved in immune response	40	-0.571532	-1.95334	regression	0.000298789	0.0187048	0.0165678
GO:0043303	mast cell degranulation	40	-0.571532	-1.95334	regression	0.000298789	0.0187048	0.0165678
GO:0045576	mast cell activation	48	-0.538585	-1.91415	regression	0.000307172	0.0187115	0.0165737
GO:0033003	regulation of mast cell activation	34	-0.599489	-1.97562	regression	0.000307784	0.0187115	0.0165737
GO:0031279	regulation of cyclase activity	44	-0.553005	-1.92969	regression	0.000308537	0.0187115	0.0165737
GO:0006825	copper ion transport	18	0.713062	1.9769	regression	0.000321267	0.0192826	0.0170796
GO:0006833	water transport	17	0.724068	1.97842	regression	0.000329432	0.0195709	0.017335
GO:0031280	negative regulation of cyclase activity	23	-0.668525	-2.00665	regression	0.000333551	0.0196155	0.0173744
GO:2001257	regulation of cation channel activity	138	-0.394202	-1.6875	regression	0.000342036	0.0199133	0.0176382
GO:0032103	positive regulation of response to external stimulus	223	-0.345562	-1.57642	regression	0.000358443	0.020662	0.0183014
GO:0051491	positive regulation of filopodium assembly	28	-0.630883	-1.98681	regression	0.000365499	0.0208621	0.0184787
GO:0052652	cyclic purine nucleotide metabolic process	85	-0.450219	-1.78396	regression	0.00038302	0.0215304	0.0190706
GO:0042391	regulation of membrane potential	389	-0.301059	-1.45767	regression	0.000384604	0.0215304	0.0190706
GO:0043270	positive regulation of ion transport	216	-0.346926	-1.57642	regression	0.00039787	0.0217903	0.0193007
GO:0042753	positive regulation of circadian rhythm	16	-0.728271	-1.99041	regression	0.000400958	0.0217903	0.0193007
GO:0009190	cyclic nucleotide biosynthetic process	86	-0.447601	-1.77727	regression	0.000400984	0.0217903	0.0193007
GO:0007194	negative regulation of adenylate cyclase activity	21	-0.678988	-1.99209	regression	0.000404216	0.0217903	0.0193007
GO:0048245	eosinophil chemotaxis	14	-0.751438	-1.98056	regression	0.000410013	0.0219	0.0193979
GO:0060627	regulation of vesicle-mediated transport	428	-0.294775	-1.43967	regression	0.000426034	0.0225488	0.0199726
GO:0021782	glial cell development	87	0.454892	1.76206	regression	0.000438729	0.0227749	0.0201729
GO:0045666	positive regulation of neuron differentiation	309	-0.316198	-1.49651	regression	0.000442871	0.0227749	0.0201729
GO:0055076	transition metal ion homeostasis	123	0.414564	1.69587	regression	0.000443941	0.0227749	0.0201729
GO:0015837	amine transport	73	-0.467643	-1.8036	regression	0.000445953	0.0227749	0.0201729
GO:0003085	negative regulation of systemic arterial blood pressure	12	-0.778438	-1.96672	regression	0.000458136	0.0231448	0.0205005
GO:0071674	mononuclear cell migration	53	-0.513013	-1.86023	regression	0.000461146	0.0231448	0.0205005
GO:0001821	histamine secretion	10	-0.810989	-1.94436	regression	0.00047993	0.0238816	0.0211532
GO:0050805	negative regulation of synaptic transmission	65	-0.483544	-1.82486	regression	0.000492269	0.0241902	0.0214265
GO:0009410	response to xenobiotic stimulus	235	-0.337517	-1.54961	regression	0.00049444	0.0241902	0.0214265
GO:0048148	behavioral response to cocaine	17	-0.713349	-1.98088	regression	0.000506392	0.0243654	0.0215817
GO:0050921	positive regulation of chemotaxis	108	-0.416151	-1.71639	regression	0.000512378	0.0243654	0.0215817
GO:0071621	granulocyte chemotaxis	76	-0.459535	-1.78524	regression	0.000515627	0.0243654	0.0215817
GO:0051489	regulation of filopodium assembly	38	-0.566566	-1.91469	regression	0.000517288	0.0243654	0.0215817
GO:0072677	eosinophil migration	17	-0.712842	-1.97947	regression	0.000518947	0.0243654	0.0215817
GO:0033604	negative regulation of catecholamine secretion	11	-0.791934	-1.95128	regression	0.000536457	0.0247723	0.0219421
GO:0051952	regulation of amine transport	68	-0.475443	-1.8095	regression	0.000537137	0.0247723	0.0219421
GO:0002694	regulation of leukocyte activation	404	-0.295402	-1.43521	regression	0.000540379	0.0247723	0.0219421
GO:0030815	negative regulation of cAMP metabolic process	24	-0.647005	-1.96266	regression	0.000554039	0.0252001	0.022321
GO:0030800	negative regulation of cyclic nucleotide metabolic process	26	-0.635661	-1.9661	regression	0.000563908	0.0254502	0.0225425
GO:0097530	granulocyte migration	86	-0.442721	-1.75789	regression	0.000572516	0.0256399	0.0227106
GO:0030799	regulation of cyclic nucleotide metabolic process	86	-0.442588	-1.75737	regression	0.000579199	0.0257412	0.0228003
GO:0030803	negative regulation of cyclic nucleotide biosynthetic process	24	-0.645627	-1.95848	regression	0.000585759	0.0258355	0.0228838
GO:1900271	regulation of long-term synaptic potentiation	30	-0.604753	-1.93597	regression	0.000613271	0.0266584	0.0236127
GO:0002448	mast cell mediated immunity	42	-0.544349	-1.88066	regression	0.000613574	0.0266584	0.0236127
GO:0045956	positive regulation of calcium ion-dependent exocytosis	22	-0.659456	-1.95786	regression	0.000619532	0.0267179	0.0236654
GO:0097501	stress response to metal ion	12	0.771015	1.92086	regression	0.000641406	0.0273052	0.0241856
GO:0046849	bone remodeling	70	0.476491	1.7776	regression	0.00064253	0.0273052	0.0241856
GO:0051608	histamine transport	11	-0.786176	-1.9371	regression	0.000660733	0.0278753	0.0246906
GO:0050911	detection of chemical stimulus involved in sensory perception of smell	208	-0.343877	-1.55535	regression	0.0006688	0.0278984	0.0247111
GO:0062012	regulation of small molecule metabolic process	418	-0.291594	-1.4211	regression	0.000671694	0.0278984	0.0247111
GO:0017156	calcium ion regulated exocytosis	103	-0.416605	-1.70488	regression	0.00068254	0.0278984	0.0247111
GO:0060271	cilium assembly	322	0.321685	1.48055	regression	0.000689168	0.0278984	0.0247111
GO:0030817	regulation of cAMP biosynthetic process	46	-0.527002	-1.85604	regression	0.000689424	0.0278984	0.0247111
GO:0051350	negative regulation of lyase activity	25	-0.636078	-1.94886	regression	0.000690033	0.0278984	0.0247111
GO:0002690	positive regulation of leukocyte chemotaxis	68	-0.469137	-1.7855	regression	0.000735262	0.0293495	0.0259963
GO:0007608	sensory perception of smell	231	-0.334818	-1.53389	regression	0.000738678	0.0293495	0.0259963
GO:0042737	drug catabolic process	115	0.413831	1.67583	regression	0.000741047	0.0293495	0.0259963
GO:0030818	negative regulation of cAMP biosynthetic process	22	-0.652634	-1.93761	regression	0.000777575	0.0303856	0.0269141
GO:0032409	regulation of transporter activity	225	-0.336197	-1.53529	regression	0.000777646	0.0303856	0.0269141
GO:0032412	regulation of ion transmembrane transporter activity	208	-0.341855	-1.5462	regression	0.000789753	0.0306529	0.0271509
GO:0007269	neurotransmitter secretion	128	-0.388364	-1.64444	regression	0.000812572	0.0309811	0.0274415
GO:0099643	signal release from synapse	128	-0.388364	-1.64444	regression	0.000812572	0.0309811	0.0274415
GO:0070588	calcium ion transmembrane transport	269	-0.320186	-1.49255	regression	0.000814171	0.0309811	0.0274415
GO:2000463	positive regulation of excitatory postsynaptic potential	25	-0.631402	-1.93453	regression	0.000836083	0.0316083	0.0279971
GO:0030031	cell projection assembly	496	0.293234	1.40329	regression	0.000842174	0.0316331	0.0280191
GO:0061564	axon development	467	-0.282218	-1.38899	regression	0.000849562	0.0316936	0.0280726
GO:0002685	regulation of leukocyte migration	135	-0.382891	-1.63388	regression	0.000855136	0.0316936	0.0280726
GO:1903532	positive regulation of secretion by cell	314	-0.308233	-1.46122	regression	0.000860114	0.0316936	0.0280726
GO:0046677	response to antibiotic	277	-0.317184	-1.48328	regression	0.000904511	0.033014	0.0292422
GO:0072503	cellular divalent inorganic cation homeostasis	386	-0.293319	-1.41908	regression	0.000908827	0.033014	0.0292422
GO:0048265	response to pain	23	-0.641056	-1.9242	regression	0.00091832	0.033014	0.0292422
GO:0033006	regulation of mast cell activation involved in immune response	26	-0.62139	-1.92196	regression	0.000924301	0.033014	0.0292422
GO:0043304	regulation of mast cell degranulation	26	-0.62139	-1.92196	regression	0.000924301	0.033014	0.0292422
GO:0007409	axonogenesis	432	-0.286096	-1.39855	regression	0.000966848	0.0342922	0.0303744
GO:0035902	response to immobilization stress	23	-0.63882	-1.91748	regression	0.000975319	0.0342922	0.0303744
GO:0048708	astrocyte differentiation	63	0.482278	1.76518	regression	0.000977758	0.0342922	0.0303744
GO:0007216	G-protein coupled glutamate receptor signaling pathway	14	-0.729044	-1.92154	regression	0.000992774	0.0346104	0.0306562
GO:0002688	regulation of leukocyte chemotaxis	84	-0.434305	-1.71751	regression	0.00101	0.0350015	0.0310026
GO:0046661	male sex differentiation	135	0.391672	1.6242	regression	0.00101629	0.035011	0.031011
GO:0050433	regulation of catecholamine secretion	40	-0.540453	-1.84712	regression	0.00104254	0.0356485	0.0315757
GO:0035641	locomotory exploration behavior	13	-0.741533	-1.91594	regression	0.00105055	0.0356485	0.0315757
GO:0099531	presynaptic process involved in chemical synaptic transmission	137	-0.376954	-1.61208	regression	0.00105317	0.0356485	0.0315757
GO:0140029	exocytic process	72	-0.452727	-1.74168	regression	0.00109205	0.0364019	0.032243
GO:0044782	cilium organization	331	0.315425	1.45569	regression	0.00109357	0.0364019	0.032243
GO:0046717	acid secretion	102	-0.408787	-1.67025	regression	0.00109418	0.0364019	0.032243
GO:0048520	positive regulation of behavior	21	-0.651539	-1.91156	regression	0.00114949	0.0380246	0.0336804
GO:0022898	regulation of transmembrane transporter activity	213	-0.333512	-1.51285	regression	0.00128225	0.042153	0.0373371
GO:0120031	plasma membrane bounded cell projection assembly	483	0.290757	1.38841	regression	0.00128993	0.042153	0.0373371
GO:0006813	potassium ion transport	202	-0.337541	-1.5213	regression	0.00129601	0.042153	0.0373371
GO:0035930	corticosteroid hormone secretion	13	-0.735078	-1.89926	regression	0.00134744	0.0433415	0.0383898
GO:2000846	regulation of corticosteroid hormone secretion	13	-0.735078	-1.89926	regression	0.00134744	0.0433415	0.0383898
GO:0051924	regulation of calcium ion transport	198	-0.338687	-1.52248	regression	0.00136979	0.0436918	0.0387
GO:0099504	synaptic vesicle cycle	120	-0.387235	-1.62359	regression	0.00137334	0.0436918	0.0387
GO:0007565	female pregnancy	167	-0.353057	-1.5523	regression	0.00142739	0.0447505	0.0396378
GO:0042044	fluid transport	24	0.626268	1.86485	regression	0.00144372	0.0447505	0.0396378
GO:0015874	norepinephrine transport	19	-0.66317	-1.89622	regression	0.00144792	0.0447505	0.0396378
GO:0072507	divalent inorganic cation homeostasis	401	-0.286494	-1.39094	regression	0.00144871	0.0447505	0.0396378
GO:0097106	postsynaptic density organization	14	-0.719245	-1.89571	regression	0.00145274	0.0447505	0.0396378
GO:0099084	postsynaptic specialization organization	14	-0.719245	-1.89571	regression	0.00145274	0.0447505	0.0396378
GO:0010976	positive regulation of neuron projection development	234	-0.324739	-1.49014	regression	0.00146368	0.0448501	0.039726
GO:0006939	smooth muscle contraction	88	-0.42098	-1.6784	regression	0.00152344	0.0464371	0.0411317
GO:0006940	regulation of smooth muscle contraction	53	-0.486781	-1.76511	regression	0.00155963	0.0471073	0.0417253
GO:0050920	regulation of chemotaxis	165	-0.353038	-1.54968	regression	0.00156161	0.0471073	0.0417253
GO:0090276	regulation of peptide hormone secretion	183	-0.34323	-1.52742	regression	0.00157763	0.0472299	0.0418339
GO:0032060	bleb assembly	11	0.762157	1.85511	regression	0.00158931	0.0472299	0.0418339
GO:0007204	positive regulation of cytosolic calcium ion concentration	245	-0.319299	-1.47331	regression	0.00159001	0.0472299	0.0418339
GO:0070509	calcium ion import	66	-0.456066	-1.72596	regression	0.00161203	0.0476407	0.0421978
GO:0045921	positive regulation of exocytosis	74	-0.440089	-1.70131	regression	0.00163782	0.047649	0.0422052
GO:0090280	positive regulation of calcium ion import	15	-0.702713	-1.88768	regression	0.00164651	0.047649	0.0422052
GO:0050432	catecholamine secretion	43	-0.516927	-1.79475	regression	0.00164954	0.047649	0.0422052
GO:0007638	mechanosensory behavior	12	-0.744654	-1.88137	regression	0.00165012	0.047649	0.0422052
GO:0099601	regulation of neurotransmitter receptor activity	41	-0.524932	-1.80382	regression	0.00165475	0.047649	0.0422052
GO:0045606	positive regulation of epidermal cell differentiation	20	0.654071	1.86174	regression	0.00166141	0.047649	0.0422052
GO:0031346	positive regulation of cell projection organization	315	-0.300416	-1.42475	regression	0.00170039	0.0485278	0.0429835
GO:0045471	response to ethanol	109	-0.393898	-1.62711	regression	0.00172292	0.0487602	0.0431894
GO:0006067	ethanol metabolic process	14	0.717198	1.8624	regression	0.00173811	0.0487602	0.0431894
GO:0046847	filopodium assembly	51	-0.489322	-1.7606	regression	0.00174157	0.0487602	0.0431894
GO:0021761	limbic system development	93	-0.410894	-1.65352	regression	0.00174204	0.0487602	0.0431894
GO:2000406	positive regulation of T cell migration	20	-0.647672	-1.8766	regression	0.00177404	0.0492118	0.0435894
GO:0071636	positive regulation of transforming growth factor beta production	16	-0.687942	-1.88018	regression	0.00177508	0.0492118	0.0435894
GO:1903522	regulation of blood circulation	251	-0.316079	-1.46214	regression	0.00179413	0.0493789	0.0437374
GO:0042481	regulation of odontogenesis	21	0.643182	1.85322	regression	0.00179806	0.0493789	0.0437374
GO:0048247	lymphocyte chemotaxis	39	-0.529898	-1.80088	regression	0.00181969	0.0497382	0.0440556
GO:2000311	regulation of AMPA receptor activity	22	-0.628767	-1.86675	regression	0.00184806	0.0500632	0.0443435
GO:0035929	steroid hormone secretion	18	-0.665701	-1.87644	regression	0.00184878	0.0500632	0.0443435
GO:0006968	cellular defense response	41	-0.521189	-1.79096	regression	0.00187424	0.0502917	0.0445459
GO:0042596	fear response	34	-0.554388	-1.82699	regression	0.00187449	0.0502917	0.0445459
GO:0050727	regulation of inflammatory response	266	-0.310652	-1.44618	regression	0.00198187	0.0529286	0.0468815
GO:0001662	behavioral fear response	32	-0.563581	-1.83127	regression	0.0020019	0.0529776	0.046925
GO:0002209	behavioral defense response	32	-0.563581	-1.83127	regression	0.0020019	0.0529776	0.046925
GO:1903524	positive regulation of blood circulation	61	-0.461755	-1.7217	regression	0.00203685	0.0535134	0.0473996
GO:0006171	cAMP biosynthetic process	57	-0.471026	-1.73302	regression	0.0020484	0.0535134	0.0473996
GO:1904062	regulation of cation transmembrane transport	263	-0.310794	-1.4451	regression	0.00204972	0.0535134	0.0473996
GO:0002696	positive regulation of leukocyte activation	250	-0.314192	-1.45287	regression	0.00212401	0.054876	0.0486065
GO:0046850	regulation of bone remodeling	40	0.531158	1.77586	regression	0.00212419	0.054876	0.0486065
GO:0030825	positive regulation of cGMP metabolic process	17	-0.672545	-1.86757	regression	0.00213019	0.054876	0.0486065
GO:0046068	cGMP metabolic process	46	-0.499054	-1.75761	regression	0.00221307	0.0559886	0.049592
GO:0010818	T cell chemotaxis	15	-0.6942	-1.86481	regression	0.00221549	0.0559886	0.049592
GO:0002699	positive regulation of immune effector process	146	-0.358673	-1.54789	regression	0.00222067	0.0559886	0.049592
GO:0030195	negative regulation of blood coagulation	36	-0.538881	-1.79919	regression	0.00222147	0.0559886	0.049592
GO:1900047	negative regulation of hemostasis	36	-0.538881	-1.79919	regression	0.00222147	0.0559886	0.049592
GO:2000403	positive regulation of lymphocyte migration	25	-0.601819	-1.84389	regression	0.00226483	0.0566655	0.0501915
GO:0007622	rhythmic behavior	40	-0.51968	-1.77612	regression	0.00226779	0.0566655	0.0501915
GO:0090023	positive regulation of neutrophil chemotaxis	19	-0.649072	-1.85591	regression	0.00236703	0.0588926	0.0521642
GO:0006895	Golgi to endosome transport	17	0.671881	1.83583	regression	0.0024037	0.0595505	0.0527469
GO:0048588	developmental cell growth	186	-0.335139	-1.49467	regression	0.00243152	0.0598463	0.053009
GO:0006836	neurotransmitter transport	217	-0.323452	-1.47052	regression	0.0024362	0.0598463	0.053009
GO:1900449	regulation of glutamate receptor signaling pathway	39	-0.520952	-1.77048	regression	0.00257592	0.0628749	0.0556915
GO:1902624	positive regulation of neutrophil migration	21	-0.627864	-1.8421	regression	0.00258109	0.0628749	0.0556915
GO:2000831	regulation of steroid hormone secretion	16	-0.676682	-1.84941	regression	0.00263964	0.063835	0.056542
GO:0010720	positive regulation of cell development	443	-0.274724	-1.34587	regression	0.00264243	0.063835	0.056542
GO:0030510	regulation of BMP signaling pathway	71	0.444158	1.66116	regression	0.00267991	0.0643212	0.0569726
GO:0060986	endocrine hormone secretion	42	-0.50794	-1.75487	regression	0.00268465	0.0643212	0.0569726
GO:0010544	negative regulation of platelet activation	14	-0.700616	-1.84661	regression	0.00270567	0.0645591	0.0571833
GO:0010959	regulation of metal ion transport	313	-0.295397	-1.39985	regression	0.00275115	0.0653764	0.0579072
GO:0050906	detection of stimulus involved in sensory perception	281	-0.30279	-1.41822	regression	0.00276648	0.0654732	0.057993
GO:0048771	tissue remodeling	132	0.376443	1.55594	regression	0.00279743	0.0659379	0.0584046
GO:0050819	negative regulation of coagulation	39	-0.518147	-1.76095	regression	0.00284662	0.0665954	0.0589869
GO:0035773	insulin secretion involved in cellular response to glucose stimulus	53	-0.472842	-1.71457	regression	0.00285606	0.0665954	0.0589869
GO:0002790	peptide secretion	492	-0.268642	-1.32802	regression	0.00285964	0.0665954	0.0589869
GO:0035455	response to interferon-alpha	18	0.655899	1.81842	regression	0.00291244	0.0673181	0.059627
GO:0030322	stabilization of membrane potential	14	-0.698512	-1.84107	regression	0.0029138	0.0673181	0.059627
GO:0010975	regulation of neuron projection development	408	-0.278805	-1.35591	regression	0.00296829	0.068306	0.0605021
GO:0051151	negative regulation of smooth muscle cell differentiation	11	0.743385	1.80942	regression	0.00303554	0.0693289	0.0614081
GO:0043300	regulation of leukocyte degranulation	37	-0.524783	-1.76331	regression	0.00303656	0.0693289	0.0614081
GO:0061045	negative regulation of wound healing	53	-0.470688	-1.70676	regression	0.00310186	0.0705431	0.0624836
GO:0007616	long-term memory	33	-0.543471	-1.77858	regression	0.00321217	0.0727676	0.064454
GO:0030431	sleep	31	-0.552848	-1.78315	regression	0.00323178	0.072928	0.064596
GO:2001025	positive regulation of response to drug	23	-0.604457	-1.81434	regression	0.00326584	0.0733242	0.064947
GO:0046546	development of primary male sexual characteristics	117	0.385763	1.56614	regression	0.00327453	0.0733242	0.064947
GO:0045761	regulation of adenylate cyclase activity	31	-0.552134	-1.78085	regression	0.00330208	0.0736579	0.0652426
GO:0003073	regulation of systemic arterial blood pressure	79	-0.416386	-1.62893	regression	0.00336221	0.0746491	0.0661205
GO:0008584	male gonad development	116	0.386057	1.56529	regression	0.00337216	0.0746491	0.0661205
GO:0030850	prostate gland development	41	0.515083	1.73106	regression	0.00339449	0.0748587	0.0663062
GO:1903792	negative regulation of anion transport	20	-0.627179	-1.81722	regression	0.0034577	0.075965	0.0672861
GO:0051968	positive regulation of synaptic transmission, glutamatergic	28	-0.568952	-1.79177	regression	0.00347862	0.0761373	0.0674387
GO:0030509	BMP signaling pathway	126	0.376633	1.5461	regression	0.00359649	0.0784223	0.0694626
GO:0006163	purine nucleotide metabolic process	461	-0.269479	-1.32483	regression	0.00366472	0.079612	0.0705164
GO:0051047	positive regulation of secretion	339	-0.286754	-1.36999	regression	0.00369076	0.0798593	0.0707354
GO:0050746	regulation of lipoprotein metabolic process	12	0.721693	1.79798	regression	0.00370354	0.0798593	0.0707354
GO:0007606	sensory perception of chemical stimulus	287	-0.297243	-1.39563	regression	0.00371976	0.0799131	0.0707831
GO:0050886	endocrine process	73	-0.422969	-1.6313	regression	0.00380826	0.0809883	0.0717355
GO:0071772	response to BMP	135	0.368892	1.52973	regression	0.00381154	0.0809883	0.0717355
GO:0071773	cellular response to BMP stimulus	135	0.368892	1.52973	regression	0.00381154	0.0809883	0.0717355
GO:1903859	regulation of dendrite extension	19	-0.633447	-1.81123	regression	0.00383174	0.0811214	0.0718534
GO:0046688	response to copper ion	29	0.565284	1.75985	regression	0.0038688	0.08133	0.0720381
GO:0060261	positive regulation of transcription initiation from RNA polymerase II promoter	21	-0.615134	-1.80475	regression	0.00386953	0.08133	0.0720381
GO:0050777	negative regulation of immune response	112	-0.374777	-1.55492	regression	0.00391127	0.0817654	0.0724238
GO:0043062	extracellular structure organization	338	0.299879	1.38683	regression	0.00391833	0.0817654	0.0724238
GO:0006195	purine nucleotide catabolic process	42	-0.496244	-1.71446	regression	0.00404528	0.0833287	0.0738084
GO:0002703	regulation of leukocyte mediated immunity	141	-0.352102	-1.51199	regression	0.00405622	0.0833287	0.0738084
GO:0050680	negative regulation of epithelial cell proliferation	112	0.386543	1.559	regression	0.0040596	0.0833287	0.0738084
GO:0015672	monovalent inorganic cation transport	440	-0.270943	-1.32653	regression	0.00406122	0.0833287	0.0738084
GO:0006646	phosphatidylethanolamine biosynthetic process	12	0.718948	1.79114	regression	0.00406481	0.0833287	0.0738084
GO:0045926	negative regulation of growth	209	0.331825	1.45682	regression	0.00417025	0.0851902	0.0754573
GO:0034103	regulation of tissue remodeling	62	0.452056	1.64963	regression	0.00419279	0.0853512	0.0755999
GO:0030823	regulation of cGMP metabolic process	24	-0.588811	-1.78613	regression	0.00427371	0.086389	0.0765191
GO:0048706	embryonic skeletal system development	106	-0.378754	-1.55746	regression	0.00428248	0.086389	0.0765191
GO:0014902	myotube differentiation	93	-0.392614	-1.57996	regression	0.00430135	0.086389	0.0765191
GO:1901072	glucosamine-containing compound catabolic process	10	0.751064	1.78075	regression	0.00430313	0.086389	0.0765191
GO:0002227	innate immune response in mucosa	16	-0.65992	-1.8036	regression	0.00434162	0.0866457	0.0767465
GO:0007156	homophilic cell adhesion via plasma membrane adhesion molecules	132	-0.356138	-1.51468	regression	0.00434568	0.0866457	0.0767465
GO:0014047	glutamate secretion	38	-0.510137	-1.72399	regression	0.00438944	0.0872195	0.0772548
GO:0097479	synaptic vesicle localization	114	-0.370268	-1.54035	regression	0.00444607	0.0880442	0.0779852
GO:0051937	catecholamine transport	54	-0.458626	-1.66949	regression	0.00451106	0.0885217	0.0784082
GO:0071280	cellular response to copper ion	17	0.651793	1.78094	regression	0.00451437	0.0885217	0.0784082
GO:0006040	amino sugar metabolic process	35	0.531254	1.72625	regression	0.00451579	0.0885217	0.0784082
GO:0045453	bone resorption	49	0.481223	1.67731	regression	0.00454813	0.0888565	0.0787047
GO:0042445	hormone metabolic process	179	-0.328664	-1.45816	regression	0.00464134	0.0903743	0.0800491
GO:0031650	regulation of heat generation	10	-0.744991	-1.78613	regression	0.00467518	0.0906497	0.0802931
GO:1904861	excitatory synapse assembly	11	-0.727916	-1.79355	regression	0.00469556	0.0906497	0.0802931
GO:0014002	astrocyte development	29	0.559294	1.74121	regression	0.00472601	0.0906497	0.0802931
GO:0046456	icosanoid biosynthetic process	38	-0.507576	-1.71533	regression	0.00473501	0.0906497	0.0802931
GO:0050867	positive regulation of cell activation	259	-0.300969	-1.39709	regression	0.00474521	0.0906497	0.0802931
GO:0050728	negative regulation of inflammatory response	99	-0.383739	-1.56025	regression	0.00474891	0.0906497	0.0802931
GO:0046058	cAMP metabolic process	87	-0.397611	-1.58199	regression	0.00476574	0.0906736	0.0803143
GO:0030801	positive regulation of cyclic nucleotide metabolic process	47	-0.475479	-1.68206	regression	0.00482817	0.0915622	0.0811013
GO:0016482	cytosolic transport	123	0.373628	1.52841	regression	0.00487622	0.0920917	0.0815703
GO:0006482	protein demethylation	28	0.563687	1.741	regression	0.00490354	0.0920917	0.0815703
GO:0008214	protein dealkylation	28	0.563687	1.741	regression	0.00490354	0.0920917	0.0815703
GO:0015701	bicarbonate transport	39	0.511159	1.69997	regression	0.00498748	0.093367	0.0826999
GO:1990138	neuron projection extension	144	-0.346039	-1.49045	regression	0.00506703	0.0945076	0.0837102
GO:0010460	positive regulation of heart rate	20	-0.614197	-1.7796	regression	0.0050846	0.0945076	0.0837102
GO:0048243	norepinephrine secretion	15	-0.66663	-1.79075	regression	0.00511043	0.0945076	0.0837102
GO:0090659	walking behavior	25	0.580872	1.74644	regression	0.00512168	0.0945076	0.0837102
GO:0051051	negative regulation of transport	387	-0.27557	-1.33364	regression	0.00512958	0.0945076	0.0837102
GO:0007567	parturition	14	-0.678958	-1.78953	regression	0.00515327	0.0946445	0.0838315
GO:0046916	cellular transition metal ion homeostasis	97	0.396016	1.56177	regression	0.00517631	0.0947688	0.0839416
GO:0070372	regulation of ERK1 and ERK2 cascade	257	-0.300228	-1.39255	regression	0.00520843	0.095058	0.0841977
GO:0016577	histone demethylation	27	0.567584	1.73824	regression	0.00523028	0.0951584	0.0842866
GO:0045604	regulation of epidermal cell differentiation	50	0.474343	1.66015	regression	0.00529475	0.0960312	0.0850597
GO:0031223	auditory behavior	10	-0.740421	-1.77517	regression	0.00531233	0.0960508	0.0850771
GO:0062013	positive regulation of small molecule metabolic process	145	-0.344334	-1.48452	regression	0.00536533	0.0965935	0.0855578
GO:0010889	regulation of sequestering of triglyceride	10	0.743413	1.76261	regression	0.00537552	0.0965935	0.0855578
GO:0010517	regulation of phospholipase activity	50	-0.463606	-1.66156	regression	0.00539285	0.0966067	0.0855695
GO:0050795	regulation of behavior	58	-0.44374	-1.63808	regression	0.00543768	0.0971109	0.0860161
GO:0022407	regulation of cell-cell adhesion	313	-0.286791	-1.35906	regression	0.00549487	0.0978323	0.086655
GO:0016079	synaptic vesicle exocytosis	78	-0.406244	-1.58566	regression	0.00553932	0.0982135	0.0869927
GO:1901385	regulation of voltage-gated calcium channel activity	35	-0.515912	-1.71119	regression	0.00555003	0.0982135	0.0869927
GO:0045117	azole transport	20	-0.610889	-1.77002	regression	0.00558487	0.098389	0.0871482
GO:0007200	phospholipase C-activating G-protein coupled receptor signaling pathway	90	-0.389914	-1.5605	regression	0.00559374	0.098389	0.0871482
GO:0043410	positive regulation of MAPK cascade	460	-0.265447	-1.30476	regression	0.00561673	0.0984958	0.0872428
GO:0033004	negative regulation of mast cell activation	10	-0.73796	-1.76927	regression	0.00571778	0.0999668	0.0885457
GO:0010001	glial cell differentiation	183	0.336632	1.45411	regression	0.00578699	0.100874	0.0893491
GO:0042107	cytokine metabolic process	90	-0.388617	-1.55531	regression	0.00589979	0.102533	0.0908188
GO:0060612	adipose tissue development	35	0.522611	1.69816	regression	0.00592909	0.102736	0.0909981
GO:0046887	positive regulation of hormone secretion	115	-0.363482	-1.51424	regression	0.00601133	0.103733	0.0918813
GO:0002675	positive regulation of acute inflammatory response	22	-0.591832	-1.75709	regression	0.00603517	0.103733	0.0918813
GO:0032925	regulation of activin receptor signaling pathway	19	-0.617378	-1.76528	regression	0.00605398	0.103733	0.0918813
GO:0051590	positive regulation of neurotransmitter transport	25	-0.56867	-1.74233	regression	0.0060579	0.103733	0.0918813
GO:0090189	regulation of branching involved in ureteric bud morphogenesis	19	0.62102	1.74513	regression	0.00620874	0.105756	0.0936731
GO:1902115	regulation of organelle assembly	143	0.355263	1.48499	regression	0.00622404	0.105756	0.0936731
GO:0002888	positive regulation of myeloid leukocyte mediated immunity	19	-0.61626	-1.76209	regression	0.00623235	0.105756	0.0936731
GO:0099173	postsynapse organization	94	-0.383161	-1.54466	regression	0.0062487	0.105756	0.0936731
GO:1902117	positive regulation of organelle assembly	56	0.454317	1.62583	regression	0.00627571	0.105861	0.0937661
GO:0061178	regulation of insulin secretion involved in cellular response to glucose stimulus	46	-0.471119	-1.65922	regression	0.00629127	0.105861	0.0937661
GO:0090279	regulation of calcium ion import	29	-0.54183	-1.72086	regression	0.00639908	0.107364	0.0950981
GO:1904357	negative regulation of telomere maintenance via telomere lengthening	23	0.587254	1.73081	regression	0.00642206	0.10744	0.0951653
GO:0007157	heterophilic cell-cell adhesion via plasma membrane cell adhesion molecules	45	-0.473618	-1.66072	regression	0.00649098	0.107991	0.0956533
GO:0048512	circadian behavior	39	-0.493926	-1.67863	regression	0.00652897	0.107991	0.0956533
GO:0032102	negative regulation of response to external stimulus	248	-0.299695	-1.38472	regression	0.00653429	0.107991	0.0956533
GO:0051004	regulation of lipoprotein lipase activity	16	0.650724	1.74995	regression	0.00654707	0.107991	0.0956533
GO:0014061	regulation of norepinephrine secretion	14	-0.669881	-1.7656	regression	0.00654773	0.107991	0.0956533
GO:0031649	heat generation	16	-0.643887	-1.75978	regression	0.0066346	0.108922	0.0964776
GO:0022010	central nervous system myelination	16	0.64998	1.74795	regression	0.00666028	0.108922	0.0964776
GO:0032291	axon ensheathment in central nervous system	16	0.64998	1.74795	regression	0.00666028	0.108922	0.0964776
GO:0071634	regulation of transforming growth factor beta production	25	-0.564898	-1.73077	regression	0.0068199	0.11122	0.098513
GO:1900542	regulation of purine nucleotide metabolic process	166	-0.328196	-1.44191	regression	0.00694831	0.112997	0.100087
GO:0048642	negative regulation of skeletal muscle tissue development	12	0.700722	1.74574	regression	0.00698785	0.11307	0.100151
GO:0007193	adenylate cyclase-inhibiting G-protein coupled receptor signaling pathway	68	-0.416689	-1.58589	regression	0.00699159	0.11307	0.100151
GO:0090102	cochlea development	40	-0.487211	-1.66515	regression	0.00708496	0.113968	0.100947
GO:0055069	zinc ion homeostasis	31	0.535648	1.69312	regression	0.0070863	0.113968	0.100947
GO:0016358	dendrite development	195	-0.315386	-1.41526	regression	0.0071097	0.114029	0.101002
GO:0044003	modification by symbiont of host morphology or physiology	40	0.496908	1.66135	regression	0.00714485	0.114278	0.101222
GO:0071604	transforming growth factor beta production	26	-0.556687	-1.72183	regression	0.00717181	0.114395	0.101326
GO:0071625	vocalization behavior	15	-0.653805	-1.7563	regression	0.0072759	0.115509	0.102312
GO:0010543	regulation of platelet activation	25	-0.562698	-1.72403	regression	0.00728133	0.115509	0.102312
GO:0071624	positive regulation of granulocyte chemotaxis	21	-0.592453	-1.73821	regression	0.00738958	0.116218	0.10294
GO:0071560	cellular response to transforming growth factor beta stimulus	197	-0.314041	-1.41087	regression	0.00742677	0.116218	0.10294
GO:0035094	response to nicotine	37	-0.497578	-1.6719	regression	0.00742747	0.116218	0.10294
GO:0060134	prepulse inhibition	12	-0.694298	-1.75414	regression	0.00742969	0.116218	0.10294
GO:0032418	lysosome localization	61	-0.428815	-1.59888	regression	0.00743198	0.116218	0.10294
GO:2000392	regulation of lamellipodium morphogenesis	11	0.714003	1.7379	regression	0.00744578	0.116218	0.10294
GO:0045933	positive regulation of muscle contraction	47	-0.46292	-1.63762	regression	0.00750183	0.116504	0.103193
GO:0042089	cytokine biosynthetic process	89	-0.384817	-1.53723	regression	0.00752279	0.116504	0.103193
GO:0060026	convergent extension	14	0.6692	1.73776	regression	0.00752411	0.116504	0.103193
GO:0050769	positive regulation of neurogenesis	390	-0.27033	-1.30924	regression	0.00767695	0.118555	0.10501
GO:0044060	regulation of endocrine process	40	-0.48448	-1.65582	regression	0.00771478	0.118772	0.105202
GO:0055090	acylglycerol homeostasis	25	0.566996	1.70472	regression	0.00776403	0.118772	0.105202
GO:0070328	triglyceride homeostasis	25	0.566996	1.70472	regression	0.00776403	0.118772	0.105202
GO:0046394	carboxylic acid biosynthetic process	350	0.289527	1.34339	regression	0.00777743	0.118772	0.105202
GO:0007568	aging	255	-0.294859	-1.36658	regression	0.00779299	0.118772	0.105202
GO:0002251	organ or tissue specific immune response	25	-0.560004	-1.71578	regression	0.00783378	0.119082	0.105477
GO:0030828	positive regulation of cGMP biosynthetic process	16	-0.63752	-1.74238	regression	0.00790639	0.119872	0.106177
GO:0006882	cellular zinc ion homeostasis	30	0.536804	1.68418	regression	0.00802807	0.121401	0.107531
GO:0032205	negative regulation of telomere maintenance	32	0.526382	1.67601	regression	0.00815146	0.122633	0.108622
GO:0051588	regulation of neurotransmitter transport	81	-0.392824	-1.54367	regression	0.00819774	0.122633	0.108622
GO:0030808	regulation of nucleotide biosynthetic process	129	-0.346451	-1.46856	regression	0.00821265	0.122633	0.108622
GO:1900371	regulation of purine nucleotide biosynthetic process	129	-0.346451	-1.46856	regression	0.00821265	0.122633	0.108622
GO:1903421	regulation of synaptic vesicle recycling	14	-0.66188	-1.74452	regression	0.00821484	0.122633	0.108622
GO:0009306	protein secretion	461	-0.261248	-1.28437	regression	0.00825607	0.122933	0.108888
GO:0031128	developmental induction	25	0.564826	1.6982	regression	0.00828909	0.12311	0.109045
GO:0016053	organic acid biosynthetic process	351	0.288504	1.33894	regression	0.00832527	0.123118	0.109051
GO:0010518	positive regulation of phospholipase activity	42	-0.475014	-1.64111	regression	0.00833384	0.123118	0.109051
GO:0071559	response to transforming growth factor beta	200	-0.311212	-1.40083	regression	0.00835304	0.123118	0.109051
GO:0006140	regulation of nucleotide metabolic process	172	-0.322015	-1.42132	regression	0.00842421	0.123853	0.109703
GO:0030804	positive regulation of cyclic nucleotide biosynthetic process	36	-0.497161	-1.6599	regression	0.00860095	0.126133	0.111722
GO:0043949	regulation of cAMP-mediated signaling	37	-0.492737	-1.65564	regression	0.00868753	0.127082	0.112563
GO:0070371	ERK1 and ERK2 cascade	271	-0.289613	-1.35117	regression	0.00875695	0.127777	0.113178
GO:0010744	positive regulation of macrophage derived foam cell differentiation	14	0.663389	1.72267	regression	0.00885416	0.128526	0.113842
GO:2001023	regulation of response to drug	74	-0.400988	-1.55015	regression	0.0088831	0.128526	0.113842
GO:0045124	regulation of bone resorption	32	0.523579	1.66708	regression	0.00888411	0.128526	0.113842
GO:0046337	phosphatidylethanolamine metabolic process	17	0.628449	1.71715	regression	0.00889658	0.128526	0.113842
GO:1902803	regulation of synaptic vesicle transport	27	-0.542665	-1.69374	regression	0.0089709	0.129028	0.114286
GO:0099054	presynapse assembly	17	-0.622332	-1.72814	regression	0.00899578	0.129028	0.114286
GO:0070374	positive regulation of ERK1 and ERK2 cascade	191	-0.313238	-1.40195	regression	0.00899781	0.129028	0.114286
GO:0022410	circadian sleep/wake cycle process	23	-0.568863	-1.7075	regression	0.0091262	0.130547	0.115632
GO:0021819	layer formation in cerebral cortex	12	-0.686005	-1.73319	regression	0.00917102	0.130617	0.115694
GO:0048566	embryonic digestive tract development	32	-0.513871	-1.66974	regression	0.00917592	0.130617	0.115694
GO:0051956	negative regulation of amino acid transport	10	-0.719508	-1.72503	regression	0.00928209	0.131806	0.116747
GO:0043950	positive regulation of cAMP-mediated signaling	19	-0.601461	-1.71977	regression	0.00932963	0.1319	0.116831
GO:0043087	regulation of GTPase activity	410	-0.265779	-1.29307	regression	0.00933406	0.1319	0.116831
GO:0046348	amino sugar catabolic process	14	0.661253	1.71713	regression	0.00939311	0.132413	0.117285
GO:0007628	adult walking behavior	24	0.566659	1.68735	regression	0.00942306	0.132515	0.117375
GO:0048489	synaptic vesicle transport	107	-0.360843	-1.48624	regression	0.00952237	0.133267	0.118042
GO:0097480	establishment of synaptic vesicle localization	107	-0.360843	-1.48624	regression	0.00952237	0.133267	0.118042
GO:0072676	lymphocyte migration	66	-0.412148	-1.55976	regression	0.00961938	0.134302	0.118958
GO:0140115	export across plasma membrane	19	-0.600322	-1.71651	regression	0.0096465	0.134359	0.119008
GO:0099590	neurotransmitter receptor internalization	11	-0.700307	-1.72552	regression	0.00968523	0.134576	0.119201
GO:0045776	negative regulation of blood pressure	39	-0.48119	-1.63535	regression	0.0097666	0.135004	0.11958
GO:0051930	regulation of sensory perception of pain	28	-0.533192	-1.67916	regression	0.00978561	0.135004	0.11958
GO:0051931	regulation of sensory perception	28	-0.533192	-1.67916	regression	0.00978561	0.135004	0.11958
GO:1901071	glucosamine-containing compound metabolic process	24	0.565237	1.68311	regression	0.00982715	0.135076	0.119644
GO:0060996	dendritic spine development	83	-0.385497	-1.5213	regression	0.00986436	0.135076	0.119644
GO:0061217	regulation of mesonephros development	20	0.595352	1.6946	regression	0.00987311	0.135076	0.119644
GO:0042110	T cell activation	377	-0.269198	-1.29972	regression	0.00988361	0.135076	0.119644
GO:0014003	oligodendrocyte development	38	0.4937	1.63286	regression	0.0100784	0.137416	0.121716
GO:0036465	synaptic vesicle recycling	47	-0.453397	-1.60394	regression	0.0102426	0.138739	0.122888
GO:0070076	histone lysine demethylation	25	0.55704	1.67479	regression	0.0102623	0.138739	0.122888
GO:0032365	intracellular lipid transport	26	0.551259	1.67328	regression	0.0102746	0.138739	0.122888
GO:0030073	insulin secretion	183	-0.313993	-1.39731	regression	0.0102781	0.138739	0.122888
GO:0035640	exploration behavior	22	-0.572041	-1.69833	regression	0.0103002	0.138739	0.122888
GO:0032891	negative regulation of organic acid transport	16	-0.627408	-1.71474	regression	0.0103435	0.138739	0.122888
GO:0060998	regulation of dendritic spine development	62	-0.417389	-1.56104	regression	0.0103472	0.138739	0.122888
GO:0090128	regulation of synapse maturation	10	-0.71547	-1.71535	regression	0.0103661	0.138739	0.122888
GO:0000460	maturation of 5.8S rRNA	29	0.533499	1.6609	regression	0.010398	0.138846	0.122983
GO:0014015	positive regulation of gliogenesis	52	0.449956	1.58739	regression	0.0104226	0.138857	0.122993
GO:1904338	regulation of dopaminergic neuron differentiation	10	0.718267	1.70299	regression	0.010482	0.138952	0.123077
GO:1903037	regulation of leukocyte cell-cell adhesion	244	-0.293729	-1.35457	regression	0.0104908	0.138952	0.123077
GO:0017121	phospholipid scrambling	10	0.718203	1.70283	regression	0.0105013	0.138952	0.123077
GO:0021854	hypothalamus development	18	-0.605395	-1.70645	regression	0.0106001	0.13994	0.123952
GO:0009150	purine ribonucleotide metabolic process	446	-0.260331	-1.2761	regression	0.0106268	0.139975	0.123983
GO:0042745	circadian sleep/wake cycle	25	-0.548023	-1.67907	regression	0.0107442	0.141203	0.12507
GO:0030278	regulation of ossification	159	0.336473	1.42709	regression	0.0108158	0.141357	0.125207
GO:0030514	negative regulation of BMP signaling pathway	40	0.484149	1.61869	regression	0.0108285	0.141357	0.125207
GO:0060740	prostate gland epithelium morphogenesis	20	0.591691	1.68418	regression	0.0108288	0.141357	0.125207
GO:0032355	response to estradiol	112	-0.353338	-1.46597	regression	0.0109041	0.141724	0.125532
GO:0042749	regulation of circadian sleep/wake cycle	19	-0.595462	-1.70262	regression	0.0109056	0.141724	0.125532
GO:0072523	purine-containing compound catabolic process	48	-0.448391	-1.5936	regression	0.0109652	0.142181	0.125937
GO:1904019	epithelial cell apoptotic process	76	0.403432	1.52708	regression	0.0110048	0.142297	0.126039
GO:0021766	hippocampus development	70	-0.401516	-1.53647	regression	0.011042	0.142297	0.126039
GO:0061337	cardiac conduction	130	-0.3399	-1.44238	regression	0.0110554	0.142297	0.126039
GO:0099175	regulation of postsynapse organization	53	-0.435054	-1.57755	regression	0.0110719	0.142297	0.126039
GO:1905517	macrophage migration	29	-0.523084	-1.66132	regression	0.011108	0.142447	0.126173
GO:0050482	arachidonic acid secretion	25	-0.546419	-1.67415	regression	0.0112501	0.143636	0.127226
GO:1903963	arachidonate transport	25	-0.546419	-1.67415	regression	0.0112501	0.143636	0.127226
GO:0010573	vascular endothelial growth factor production	29	-0.52227	-1.65874	regression	0.011344	0.14423	0.127752
GO:0050863	regulation of T cell activation	265	-0.287259	-1.33678	regression	0.0113462	0.14423	0.127752
GO:0009743	response to carbohydrate	198	-0.306389	-1.37729	regression	0.0114779	0.145333	0.128729
GO:0021692	cerebellar Purkinje cell layer morphogenesis	11	0.697291	1.69722	regression	0.0114829	0.145333	0.128729
GO:0032288	myelin assembly	17	0.618238	1.68925	regression	0.0116987	0.147376	0.130539
GO:0050907	detection of chemical stimulus involved in sensory perception	240	-0.293105	-1.34899	regression	0.0117409	0.147376	0.130539
GO:0007626	locomotory behavior	163	-0.319984	-1.4023	regression	0.0117426	0.147376	0.130539
GO:0097711	ciliary basal body-plasma membrane docking	83	0.392673	1.50889	regression	0.0117593	0.147376	0.130539
GO:0009259	ribonucleotide metabolic process	460	-0.257679	-1.26658	regression	0.0117709	0.147376	0.130539
GO:0060512	prostate gland morphogenesis	21	0.58048	1.67256	regression	0.0118284	0.147642	0.130774
GO:0010454	negative regulation of cell fate commitment	11	0.696059	1.69422	regression	0.0118908	0.147642	0.130774
GO:0032924	activin receptor signaling pathway	33	-0.499754	-1.63551	regression	0.0119032	0.147642	0.130774
GO:0097484	dendrite extension	29	-0.520462	-1.65299	regression	0.0119159	0.147642	0.130774
GO:1905515	non-motile cilium assembly	46	0.461893	1.58935	regression	0.0119189	0.147642	0.130774
GO:0050857	positive regulation of antigen receptor-mediated signaling pathway	18	-0.600346	-1.69222	regression	0.0120233	0.14862	0.13164
GO:0030335	positive regulation of cell migration	390	-0.265014	-1.2835	regression	0.0121267	0.148894	0.131883
GO:0140131	positive regulation of lymphocyte chemotaxis	12	-0.674345	-1.70373	regression	0.0121271	0.148894	0.131883
GO:0045981	positive regulation of nucleotide metabolic process	75	-0.391253	-1.51627	regression	0.0121479	0.148894	0.131883
GO:1900544	positive regulation of purine nucleotide metabolic process	75	-0.391253	-1.51627	regression	0.0121479	0.148894	0.131883
GO:1905048	regulation of metallopeptidase activity	16	0.626725	1.68541	regression	0.0122556	0.1499	0.132774
GO:2000273	positive regulation of signaling receptor activity	28	-0.52465	-1.65225	regression	0.0123654	0.150925	0.133682
GO:0006875	cellular metal ion homeostasis	464	-0.256574	-1.2621	regression	0.0124492	0.15163	0.134307
GO:0072678	T cell migration	39	-0.473124	-1.60793	regression	0.0124886	0.151793	0.134451
GO:0008652	cellular amino acid biosynthetic process	70	0.408607	1.52435	regression	0.0127005	0.15401	0.136414
GO:0032515	negative regulation of phosphoprotein phosphatase activity	42	-0.460981	-1.59263	regression	0.0127494	0.15401	0.136414
GO:0010574	regulation of vascular endothelial growth factor production	27	-0.52926	-1.6519	regression	0.0127504	0.15401	0.136414
GO:0048488	synaptic vesicle endocytosis	37	-0.480014	-1.61288	regression	0.0128041	0.154339	0.136706
GO:0002861	regulation of inflammatory response to antigenic stimulus	19	-0.588287	-1.6821	regression	0.0128991	0.154541	0.136885
GO:0010256	endomembrane system organization	373	0.279769	1.30599	regression	0.012928	0.154541	0.136885
GO:0071804	cellular potassium ion transport	176	-0.312826	-1.38493	regression	0.0129452	0.154541	0.136885
GO:0071805	potassium ion transmembrane transport	176	-0.312826	-1.38493	regression	0.0129452	0.154541	0.136885
GO:0001894	tissue homeostasis	177	0.324932	1.3977	regression	0.0129537	0.154541	0.136885
GO:0072330	monocarboxylic acid biosynthetic process	248	0.302397	1.35407	regression	0.0129839	0.154585	0.136924
GO:0008016	regulation of heart contraction	209	-0.300557	-1.36027	regression	0.0131046	0.155704	0.137915
GO:0051385	response to mineralocorticoid	28	-0.522252	-1.6447	regression	0.0131559	0.155859	0.138052
GO:0002862	negative regulation of inflammatory response to antigenic stimulus	10	-0.705251	-1.69085	regression	0.0131712	0.155859	0.138052
GO:0048659	smooth muscle cell proliferation	115	-0.346777	-1.44465	regression	0.0132598	0.15659	0.138699
GO:0007163	establishment or maintenance of cell polarity	186	0.320959	1.38915	regression	0.013337	0.157182	0.139224
GO:0048511	rhythmic process	247	-0.289063	-1.33492	regression	0.0134222	0.157702	0.139685
GO:0042552	myelination	97	0.374567	1.47718	regression	0.0134386	0.157702	0.139685
GO:0002385	mucosal immune response	23	-0.553768	-1.66219	regression	0.0134624	0.157702	0.139685
GO:0007272	ensheathment of neurons	98	0.373075	1.47356	regression	0.0137179	0.160051	0.141765
GO:0008366	axon ensheathment	98	0.373075	1.47356	regression	0.0137179	0.160051	0.141765
GO:1901605	alpha-amino acid metabolic process	189	0.31922	1.38443	regression	0.0137651	0.16028	0.141968
GO:0048172	regulation of short-term neuronal synaptic plasticity	14	-0.640542	-1.68828	regression	0.0138197	0.160596	0.142248
GO:0016339	calcium-dependent cell-cell adhesion via plasma membrane cell adhesion molecules	41	-0.461937	-1.58735	regression	0.0139245	0.16149	0.14304
GO:0048246	macrophage chemotaxis	26	-0.531957	-1.64534	regression	0.013979	0.161771	0.143288
GO:0006921	cellular component disassembly involved in execution phase of apoptosis	28	0.528124	1.63116	regression	0.0140042	0.161771	0.143288
GO:0033005	positive regulation of mast cell activation	15	-0.626175	-1.68208	regression	0.0140766	0.162285	0.143744
GO:0090277	positive regulation of peptide hormone secretion	83	-0.376196	-1.4846	regression	0.014213	0.163533	0.14485
GO:0051668	localization within membrane	106	-0.352374	-1.44899	regression	0.0142952	0.164155	0.145401
GO:0007620	copulation	16	-0.613679	-1.67722	regression	0.0144616	0.165379	0.146485
GO:0106027	neuron projection organization	70	-0.3939	-1.50733	regression	0.014478	0.165379	0.146485
GO:0010508	positive regulation of autophagy	94	0.375537	1.47334	regression	0.014487	0.165379	0.146485
GO:0033273	response to vitamin	80	-0.379366	-1.48761	regression	0.0146028	0.166375	0.147367
GO:0002283	neutrophil activation involved in immune response	409	0.2735	1.2876	regression	0.0147267	0.167193	0.148092
GO:0003015	heart process	240	-0.289544	-1.33261	regression	0.0147321	0.167193	0.148092
GO:1902622	regulation of neutrophil migration	25	-0.535636	-1.64111	regression	0.0148315	0.167767	0.1486
GO:0030814	regulation of cAMP metabolic process	64	-0.40331	-1.51763	regression	0.0148445	0.167767	0.1486
GO:0019693	ribose phosphate metabolic process	476	-0.253488	-1.24963	regression	0.0148752	0.167767	0.1486
GO:0090022	regulation of neutrophil chemotaxis	23	-0.54961	-1.64971	regression	0.014919	0.167767	0.1486
GO:0071276	cellular response to cadmium ion	29	0.520535	1.62054	regression	0.0149522	0.167767	0.1486
GO:0043312	neutrophil degranulation	406	0.27359	1.28708	regression	0.0149802	0.167767	0.1486
GO:0030730	sequestering of triglyceride	11	0.686505	1.67097	regression	0.0149844	0.167767	0.1486
GO:0033081	regulation of T cell differentiation in thymus	21	-0.563967	-1.65463	regression	0.0150992	0.168728	0.149451
GO:0051412	response to corticosterone	18	-0.590999	-1.66588	regression	0.0151403	0.168863	0.149571
GO:0072488	ammonium transmembrane transport	13	0.65428	1.66567	regression	0.0154741	0.171766	0.152142
GO:0014072	response to isoquinoline alkaloid	29	-0.510197	-1.62039	regression	0.0155236	0.171766	0.152142
GO:0043278	response to morphine	29	-0.510197	-1.62039	regression	0.0155236	0.171766	0.152142
GO:0032461	positive regulation of protein oligomerization	21	-0.562658	-1.65079	regression	0.0155434	0.171766	0.152142
GO:0031282	regulation of guanylate cyclase activity	10	-0.697849	-1.6731	regression	0.0155481	0.171766	0.152142
GO:0007224	smoothened signaling pathway	117	0.353981	1.43711	regression	0.0156805	0.172902	0.153148
GO:1903861	positive regulation of dendrite extension	16	-0.609869	-1.66681	regression	0.0157293	0.172985	0.153222
GO:0090501	RNA phosphodiester bond hydrolysis	124	0.349174	1.4299	regression	0.0157475	0.172985	0.153222
GO:0009593	detection of chemical stimulus	269	-0.281569	-1.31253	regression	0.0157837	0.173056	0.153285
GO:0060997	dendritic spine morphogenesis	49	-0.434062	-1.54916	regression	0.0158524	0.173239	0.153447
GO:1903039	positive regulation of leukocyte cell-cell adhesion	176	-0.309141	-1.36862	regression	0.0158599	0.173239	0.153447
GO:0050870	positive regulation of T cell activation	169	-0.311655	-1.37237	regression	0.0159125	0.173488	0.153667
GO:1904035	regulation of epithelial cell apoptotic process	58	0.423865	1.5273	regression	0.0159807	0.173906	0.154038
GO:0007423	sensory organ development	462	-0.253947	-1.24872	regression	0.0162159	0.176072	0.155956
GO:0060047	heart contraction	237	-0.288804	-1.32722	regression	0.0162635	0.176072	0.155956
GO:0016054	organic acid catabolic process	230	0.303353	1.34706	regression	0.0163007	0.176072	0.155956
GO:0046395	carboxylic acid catabolic process	230	0.303353	1.34706	regression	0.0163007	0.176072	0.155956
GO:0051289	protein homotetramerization	74	0.395883	1.49152	regression	0.016365	0.176439	0.156281
GO:1903169	regulation of calcium ion transmembrane transport	126	-0.334091	-1.41124	regression	0.0165177	0.177756	0.157447
GO:0050802	circadian sleep/wake cycle, sleep	22	-0.552693	-1.64089	regression	0.0165798	0.178096	0.157748
GO:1903727	positive regulation of phospholipid metabolic process	39	-0.462601	-1.57217	regression	0.0168499	0.180411	0.159799
GO:0060009	Sertoli cell development	13	0.650558	1.6562	regression	0.0168574	0.180411	0.159799
GO:0010743	regulation of macrophage derived foam cell differentiation	26	0.53174	1.61403	regression	0.0171022	0.182696	0.161823
GO:0071396	cellular response to lipid	497	-0.249963	-1.23669	regression	0.0172206	0.183337	0.162391
GO:0010826	negative regulation of centrosome duplication	11	0.680125	1.65544	regression	0.0172252	0.183337	0.162391
GO:0008045	motor neuron axon guidance	21	-0.558487	-1.63855	regression	0.0172697	0.183475	0.162513
GO:0090527	actin filament reorganization	10	0.697117	1.65284	regression	0.0173267	0.183745	0.162753
GO:0043301	negative regulation of leukocyte degranulation	10	-0.692793	-1.66098	regression	0.0173892	0.183825	0.162823
GO:0031123	RNA 3'-end processing	111	0.35612	1.43446	regression	0.0174568	0.183825	0.162823
GO:1905314	semi-lunar valve development	15	0.623165	1.64794	regression	0.0174587	0.183825	0.162823
GO:0007631	feeding behavior	91	-0.361565	-1.44959	regression	0.0174605	0.183825	0.162823
GO:0099068	postsynapse assembly	16	-0.604812	-1.65298	regression	0.0175691	0.184634	0.16354
GO:0003298	physiological muscle hypertrophy	15	-0.615857	-1.65436	regression	0.0177052	0.185062	0.163919
GO:0003301	physiological cardiac muscle hypertrophy	15	-0.615857	-1.65436	regression	0.0177052	0.185062	0.163919
GO:0061049	cell growth involved in cardiac muscle cell development	15	-0.615857	-1.65436	regression	0.0177052	0.185062	0.163919
GO:0014046	dopamine secretion	23	-0.542144	-1.6273	regression	0.0177985	0.185372	0.164194
GO:0014059	regulation of dopamine secretion	23	-0.542144	-1.6273	regression	0.0177985	0.185372	0.164194
GO:0030809	negative regulation of nucleotide biosynthetic process	38	-0.464362	-1.56929	regression	0.017884	0.185598	0.164394
GO:1900372	negative regulation of purine nucleotide biosynthetic process	38	-0.464362	-1.56929	regression	0.017884	0.185598	0.164394
GO:1902041	regulation of extrinsic apoptotic signaling pathway via death domain receptors	45	0.450807	1.54414	regression	0.0181208	0.187308	0.165908
GO:0042108	positive regulation of cytokine biosynthetic process	46	-0.43792	-1.5423	regression	0.0181433	0.187308	0.165908
GO:0030277	maintenance of gastrointestinal epithelium	14	0.633908	1.64612	regression	0.0181452	0.187308	0.165908
GO:2000209	regulation of anoikis	22	0.555135	1.6181	regression	0.0182529	0.188086	0.166597
GO:0031638	zymogen activation	45	-0.440413	-1.54428	regression	0.0183371	0.188246	0.166739
GO:0048709	oligodendrocyte differentiation	87	0.376656	1.45901	regression	0.0183722	0.188246	0.166739
GO:0070986	left/right axis specification	13	0.646619	1.64617	regression	0.0183757	0.188246	0.166739
GO:0048013	ephrin receptor signaling pathway	84	-0.368274	-1.45638	regression	0.0183981	0.188246	0.166739
GO:0002827	positive regulation of T-helper 1 type immune response	11	-0.672492	-1.65698	regression	0.0184301	0.188246	0.166739
GO:0097485	neuron projection guidance	237	-0.286557	-1.31689	regression	0.0186177	0.189372	0.167736
GO:0030705	cytoskeleton-dependent intracellular transport	152	0.32916	1.3874	regression	0.0186573	0.189372	0.167736
GO:0045823	positive regulation of heart contraction	32	-0.48758	-1.58432	regression	0.0186588	0.189372	0.167736
GO:0043631	RNA polyadenylation	37	0.476049	1.56517	regression	0.0186705	0.189372	0.167736
GO:0042063	gliogenesis	236	0.299406	1.3333	regression	0.0187392	0.189739	0.168061
GO:0050961	detection of temperature stimulus involved in sensory perception	12	-0.654684	-1.65406	regression	0.0188644	0.190326	0.168582
GO:0050965	detection of temperature stimulus involved in sensory perception of pain	12	-0.654684	-1.65406	regression	0.0188644	0.190326	0.168582
GO:0030198	extracellular matrix organization	293	0.286799	1.30751	regression	0.0189172	0.190326	0.168582
GO:0051249	regulation of lymphocyte activation	347	-0.265284	-1.2704	regression	0.018928	0.190326	0.168582
GO:0019882	antigen processing and presentation	189	-0.300729	-1.34396	regression	0.0190228	0.190723	0.168933
GO:0097061	dendritic spine organization	67	-0.391305	-1.48504	regression	0.019033	0.190723	0.168933
GO:0042692	muscle cell differentiation	297	-0.273135	-1.28721	regression	0.0191498	0.191517	0.169636
GO:0003401	axis elongation	28	0.515649	1.59263	regression	0.0192213	0.191517	0.169636
GO:2000147	positive regulation of cell motility	403	-0.257883	-1.25266	regression	0.0192282	0.191517	0.169636
GO:0044090	positive regulation of vacuole organization	11	0.674762	1.64239	regression	0.0192438	0.191517	0.169636
GO:0009954	proximal/distal pattern formation	28	-0.507027	-1.59676	regression	0.0193077	0.191825	0.169909
GO:0003016	respiratory system process	26	-0.518217	-1.60284	regression	0.0194336	0.192747	0.170726
GO:0072521	purine-containing compound metabolic process	490	-0.249037	-1.23069	regression	0.0198477	0.196281	0.173856
GO:0032211	negative regulation of telomere maintenance via telomerase	18	0.585662	1.62369	regression	0.0198573	0.196281	0.173856
GO:0097050	type B pancreatic cell apoptotic process	11	0.673194	1.63857	regression	0.0199031	0.1964	0.173961
GO:0009063	cellular amino acid catabolic process	104	0.358641	1.43018	regression	0.0199976	0.19648	0.174032
GO:0043001	Golgi to plasma membrane protein transport	29	0.508902	1.58433	regression	0.0200105	0.19648	0.174032
GO:0022409	positive regulation of cell-cell adhesion	201	-0.295658	-1.33163	regression	0.0200125	0.19648	0.174032
GO:2000300	regulation of synaptic vesicle exocytosis	25	-0.523221	-1.60308	regression	0.020085	0.196861	0.174369
GO:0007320	insemination	10	-0.686148	-1.64505	regression	0.020126	0.196931	0.174431
GO:0032386	regulation of intracellular transport	363	-0.262148	-1.26107	regression	0.0202496	0.197576	0.175003
GO:0009264	deoxyribonucleotide catabolic process	17	-0.587268	-1.63077	regression	0.0202599	0.197576	0.175003
GO:2000811	negative regulation of anoikis	15	0.616374	1.62998	regression	0.0203614	0.198235	0.175586
GO:0045618	positive regulation of keratinocyte differentiation	13	0.641924	1.63421	regression	0.0204052	0.198329	0.17567
GO:1904645	response to amyloid-beta	26	-0.516085	-1.59625	regression	0.0204661	0.198428	0.175758
GO:0043547	positive regulation of GTPase activity	341	-0.265059	-1.26705	regression	0.0204835	0.198428	0.175758
GO:0045187	regulation of circadian sleep/wake cycle, sleep	18	-0.577383	-1.6275	regression	0.0205483	0.19862	0.175928
GO:0009165	nucleotide biosynthetic process	314	-0.269065	-1.27554	regression	0.0206105	0.19862	0.175928
GO:0097305	response to alcohol	164	-0.309026	-1.35542	regression	0.0206137	0.19862	0.175928
GO:1990748	cellular detoxification	88	0.372728	1.44628	regression	0.0206662	0.19862	0.175928
GO:0010842	retina layer formation	21	-0.550654	-1.61557	regression	0.020674	0.19862	0.175928
GO:1902170	cellular response to reactive nitrogen species	17	0.593276	1.62105	regression	0.0207791	0.199153	0.1764
GO:0010043	response to zinc ion	46	0.44334	1.52551	regression	0.0208227	0.199153	0.1764
GO:0042307	positive regulation of protein import into nucleus	30	-0.493209	-1.57889	regression	0.020832	0.199153	0.1764
GO:0035994	response to muscle stretch	17	-0.585891	-1.62694	regression	0.0209776	0.200087	0.177227
GO:0048521	negative regulation of behavior	14	-0.621375	-1.63776	regression	0.0210314	0.200087	0.177227
GO:0035282	segmentation	75	0.38756	1.46367	regression	0.0210328	0.200087	0.177227
GO:0050773	regulation of dendrite development	120	-0.33284	-1.39552	regression	0.0210776	0.200186	0.177315
GO:0060442	branching involved in prostate gland morphogenesis	10	0.687459	1.62994	regression	0.0213743	0.202613	0.179465
GO:1903035	negative regulation of response to wounding	66	-0.389316	-1.47335	regression	0.0214028	0.202613	0.179465
GO:0051606	detection of stimulus	404	-0.256395	-1.24569	regression	0.0214794	0.203008	0.179815
GO:0002791	regulation of peptide secretion	390	-0.257913	-1.24911	regression	0.0216274	0.204076	0.18076
GO:0045744	negative regulation of G-protein coupled receptor protein signaling pathway	38	-0.45738	-1.5457	regression	0.0216982	0.204185	0.180858
GO:0044070	regulation of anion transport	76	-0.373582	-1.45133	regression	0.0217338	0.204185	0.180858
GO:0048704	embryonic skeletal system morphogenesis	82	-0.366383	-1.4429	regression	0.0217442	0.204185	0.180858
GO:0050905	neuromuscular process	85	-0.362481	-1.4363	regression	0.0219056	0.20537	0.181906
GO:0032274	gonadotropin secretion	14	-0.619083	-1.63172	regression	0.0219701	0.205643	0.182148
GO:0090257	regulation of muscle system process	190	-0.297524	-1.33061	regression	0.0222804	0.208213	0.184425
GO:0007018	microtubule-based movement	278	0.287111	1.30178	regression	0.0223381	0.208417	0.184606
GO:0007340	acrosome reaction	25	-0.518321	-1.58806	regression	0.0225129	0.209712	0.185752
GO:0046390	ribose phosphate biosynthetic process	265	-0.276904	-1.2886	regression	0.0226704	0.210842	0.186754
GO:0085029	extracellular matrix assembly	32	0.489162	1.5575	regression	0.0227762	0.211488	0.187326
GO:0060579	ventral spinal cord interneuron fate commitment	14	0.62317	1.61823	regression	0.0228687	0.211499	0.187335
GO:0060581	cell fate commitment involved in pattern specification	14	0.62317	1.61823	regression	0.0228687	0.211499	0.187335
GO:0051651	maintenance of location in cell	83	0.375551	1.4431	regression	0.0228971	0.211499	0.187335
GO:0040037	negative regulation of fibroblast growth factor receptor signaling pathway	11	-0.662153	-1.63151	regression	0.0229227	0.211499	0.187335
GO:0009953	dorsal/ventral pattern formation	82	0.376495	1.44362	regression	0.0229844	0.211552	0.187382
GO:0048168	regulation of neuronal synaptic plasticity	48	-0.42385	-1.50638	regression	0.0230011	0.211552	0.187382
GO:0001505	regulation of neurotransmitter levels	268	-0.275939	-1.28576	regression	0.0231979	0.212616	0.188325
GO:0010742	macrophage derived foam cell differentiation	31	0.492783	1.55763	regression	0.0232774	0.212616	0.188325
GO:0090077	foam cell differentiation	31	0.492783	1.55763	regression	0.0232774	0.212616	0.188325
GO:0035176	social behavior	47	-0.426195	-1.50771	regression	0.0232994	0.212616	0.188325
GO:0051703	intraspecies interaction between organisms	47	-0.426195	-1.50771	regression	0.0232994	0.212616	0.188325
GO:0002577	regulation of antigen processing and presentation	15	-0.603206	-1.62038	regression	0.0234388	0.213553	0.189155
GO:0050687	negative regulation of defense response to virus	21	0.552005	1.59051	regression	0.0235653	0.214247	0.189769
GO:0030826	regulation of cGMP biosynthetic process	19	-0.561698	-1.60608	regression	0.0235885	0.214247	0.189769
GO:0046386	deoxyribose phosphate catabolic process	18	-0.570421	-1.60787	regression	0.0237427	0.215052	0.190482
GO:0031349	positive regulation of defense response	367	-0.259513	-1.24974	regression	0.023751	0.215052	0.190482
GO:0045987	positive regulation of smooth muscle contraction	33	-0.473523	-1.54967	regression	0.0238533	0.215369	0.190763
GO:0034755	iron ion transmembrane transport	16	0.597493	1.6068	regression	0.0238607	0.215369	0.190763
GO:2000679	positive regulation of transcription regulatory region DNA binding	19	-0.561045	-1.60421	regression	0.023897	0.215369	0.190763
GO:0009260	ribonucleotide biosynthetic process	261	-0.276733	-1.28578	regression	0.0242593	0.217808	0.192924
GO:0021536	diencephalon development	65	-0.387257	-1.46148	regression	0.0242772	0.217808	0.192924
GO:0048660	regulation of smooth muscle cell proliferation	112	-0.335108	-1.39033	regression	0.0243019	0.217808	0.192924
GO:0050930	induction of positive chemotaxis	13	-0.62739	-1.62102	regression	0.0243806	0.217808	0.192924
GO:0051272	positive regulation of cellular component movement	413	-0.253691	-1.2351	regression	0.0243913	0.217808	0.192924
GO:0051928	positive regulation of calcium ion transport	94	-0.350061	-1.41122	regression	0.0243921	0.217808	0.192924
GO:0045667	regulation of osteoblast differentiation	96	0.360351	1.41866	regression	0.0245189	0.218605	0.19363
GO:0006378	mRNA polyadenylation	35	0.473705	1.53925	regression	0.024576	0.218779	0.193783
GO:0003018	vascular process in circulatory system	143	-0.315103	-1.3558	regression	0.0247048	0.21959	0.194502
GO:0051817	modification of morphology or physiology of other organism involved in symbiotic interaction	95	0.360871	1.41828	regression	0.0247658	0.219659	0.194564
GO:0042755	eating behavior	28	-0.496361	-1.56317	regression	0.0247881	0.219659	0.194564
GO:1904591	positive regulation of protein import	33	-0.471926	-1.54444	regression	0.0248693	0.220044	0.194904
GO:0008277	regulation of G-protein coupled receptor protein signaling pathway	118	-0.330286	-1.38115	regression	0.0249458	0.220386	0.195207
GO:0048640	negative regulation of developmental growth	80	0.37626	1.43685	regression	0.0250401	0.220412	0.19523
GO:1901293	nucleoside phosphate biosynthetic process	318	-0.265685	-1.26124	regression	0.0250831	0.220412	0.19523
GO:0070661	leukocyte proliferation	225	-0.284628	-1.2998	regression	0.0250928	0.220412	0.19523
GO:1900543	negative regulation of purine nucleotide metabolic process	45	-0.429155	-1.50481	regression	0.0251002	0.220412	0.19523
GO:1902042	negative regulation of extrinsic apoptotic signaling pathway via death domain receptors	29	0.498841	1.553	regression	0.0253577	0.222338	0.196936
GO:0048871	multicellular organismal homeostasis	282	0.284289	1.29095	regression	0.0254107	0.222468	0.197051
GO:0006937	regulation of muscle contraction	138	-0.317099	-1.35744	regression	0.0255058	0.22264	0.197203
GO:0051057	positive regulation of small GTPase mediated signal transduction	49	-0.4178	-1.49112	regression	0.0255068	0.22264	0.197203
GO:0009988	cell-cell recognition	55	-0.404049	-1.47614	regression	0.0256927	0.223926	0.198343
GO:0046851	negative regulation of bone remodeling	13	0.63073	1.60572	regression	0.0258185	0.22441	0.198771
GO:0030903	notochord development	14	0.617496	1.6035	regression	0.0258253	0.22441	0.198771
GO:0042771	intrinsic apoptotic signaling pathway in response to DNA damage by p53 class mediator	42	0.447235	1.51035	regression	0.0259099	0.224606	0.198945
GO:2000144	positive regulation of DNA-templated transcription, initiation	28	-0.494455	-1.55716	regression	0.025925	0.224606	0.198945
GO:0007033	vacuole organization	135	0.330846	1.37196	regression	0.0259944	0.224873	0.199181
GO:2000171	negative regulation of dendrite development	24	-0.517992	-1.57131	regression	0.0260969	0.225425	0.19967
GO:0016999	antibiotic metabolic process	118	0.341167	1.38699	regression	0.0263022	0.226561	0.200676
GO:0051251	positive regulation of lymphocyte activation	222	-0.284584	-1.29751	regression	0.0263335	0.226561	0.200676
GO:0097191	extrinsic apoptotic signaling pathway	193	0.305722	1.32931	regression	0.0263452	0.226561	0.200676
GO:0000478	endonucleolytic cleavage involved in rRNA processing	13	0.629452	1.60246	regression	0.0264571	0.226853	0.200935
GO:0000479	endonucleolytic cleavage of tricistronic rRNA transcript (SSU-rRNA, 5.8S rRNA, LSU-rRNA)	13	0.629452	1.60246	regression	0.0264571	0.226853	0.200935
GO:0042558	pteridine-containing compound metabolic process	32	0.48267	1.53683	regression	0.0267842	0.229089	0.202916
GO:0033169	histone H3-K9 demethylation	13	0.628803	1.60081	regression	0.0267966	0.229089	0.202916
GO:1903053	regulation of extracellular matrix organization	30	0.491356	1.54159	regression	0.0269538	0.230095	0.203807
GO:0031124	mRNA 3'-end processing	82	0.371874	1.4259	regression	0.0269941	0.230102	0.203813
GO:0070265	necrotic cell death	38	0.458696	1.51709	regression	0.0270487	0.23023	0.203927
GO:1904994	regulation of leukocyte adhesion to vascular endothelial cell	11	-0.65293	-1.60878	regression	0.0273407	0.232109	0.205591
GO:0046888	negative regulation of hormone secretion	56	-0.400153	-1.46722	regression	0.0273492	0.232109	0.205591
GO:0009151	purine deoxyribonucleotide metabolic process	11	-0.652357	-1.60737	regression	0.0276742	0.234265	0.207501
GO:0001771	immunological synapse formation	10	-0.670576	-1.60772	regression	0.0277222	0.234265	0.207501
GO:0033523	histone H2B ubiquitination	11	0.657092	1.59938	regression	0.027724	0.234265	0.207501
GO:0007159	leukocyte cell-cell adhesion	267	-0.273161	-1.27224	regression	0.0279335	0.235694	0.208766
GO:2001259	positive regulation of cation channel activity	51	-0.410092	-1.47553	regression	0.0280215	0.235863	0.208916
GO:0045103	intermediate filament-based process	37	0.460973	1.5156	regression	0.0280751	0.235863	0.208916
GO:0045104	intermediate filament cytoskeleton organization	37	0.460973	1.5156	regression	0.0280751	0.235863	0.208916
GO:0072189	ureter development	11	0.655866	1.59639	regression	0.0283929	0.23819	0.210977
GO:0006633	fatty acid biosynthetic process	110	0.344649	1.38622	regression	0.028519	0.238845	0.211557
GO:0015844	monoamine transport	64	-0.383476	-1.44299	regression	0.0286309	0.238845	0.211557
GO:0046626	regulation of insulin receptor signaling pathway	45	-0.424578	-1.48876	regression	0.0286329	0.238845	0.211557
GO:0014841	skeletal muscle satellite cell proliferation	13	0.625192	1.59162	regression	0.0286351	0.238845	0.211557
GO:0009648	photoperiodism	23	-0.520557	-1.56251	regression	0.0288543	0.240328	0.212871
GO:1901606	alpha-amino acid catabolic process	90	0.361372	1.4076	regression	0.029059	0.240451	0.21298
GO:0043276	anoikis	30	0.488162	1.53157	regression	0.0290843	0.240451	0.21298
GO:0010453	regulation of cell fate commitment	27	0.503473	1.5419	regression	0.0291682	0.240451	0.21298
GO:0030810	positive regulation of nucleotide biosynthetic process	59	-0.391898	-1.45178	regression	0.0291933	0.240451	0.21298
GO:1900373	positive regulation of purine nucleotide biosynthetic process	59	-0.391898	-1.45178	regression	0.0291933	0.240451	0.21298
GO:0030193	regulation of blood coagulation	60	-0.389918	-1.44924	regression	0.0292362	0.240451	0.21298
GO:1900046	regulation of hemostasis	60	-0.389918	-1.44924	regression	0.0292362	0.240451	0.21298
GO:0009152	purine ribonucleotide biosynthetic process	249	-0.276344	-1.2773	regression	0.0292404	0.240451	0.21298
GO:0048483	autonomic nervous system development	38	-0.445642	-1.50603	regression	0.0292407	0.240451	0.21298
GO:0006972	hyperosmotic response	18	0.567415	1.57311	regression	0.0295087	0.242313	0.214629
GO:0016048	detection of temperature stimulus	15	-0.591686	-1.58943	regression	0.0295746	0.242512	0.214805
GO:0097028	dendritic cell differentiation	36	-0.451983	-1.50906	regression	0.0298195	0.244176	0.216279
GO:0045740	positive regulation of DNA replication	51	-0.407723	-1.467	regression	0.0299172	0.244632	0.216683
GO:0030540	female genitalia development	16	-0.578693	-1.5816	regression	0.0301178	0.245699	0.217628
GO:0032645	regulation of granulocyte macrophage colony-stimulating factor production	10	-0.666097	-1.59698	regression	0.0301321	0.245699	0.217628
GO:0045616	regulation of keratinocyte differentiation	33	0.473623	1.51858	regression	0.0301897	0.245825	0.217739
GO:0007411	axon guidance	235	-0.278707	-1.27961	regression	0.0302544	0.245978	0.217876
GO:2000310	regulation of NMDA receptor activity	18	-0.558504	-1.57428	regression	0.0302931	0.245978	0.217876
GO:0072207	metanephric epithelium development	25	-0.504845	-1.54677	regression	0.0303763	0.24631	0.218169
GO:0001649	osteoblast differentiation	179	0.307487	1.32447	regression	0.030552	0.246665	0.218484
GO:0006501	C-terminal protein lipidation	58	-0.392233	-1.44794	regression	0.030561	0.246665	0.218484
GO:0006164	purine nucleotide biosynthetic process	252	-0.274816	-1.27191	regression	0.0305805	0.246665	0.218484
GO:0010575	positive regulation of vascular endothelial growth factor production	23	-0.517618	-1.55368	regression	0.0305896	0.246665	0.218484
GO:0034104	negative regulation of tissue remodeling	18	0.565136	1.56679	regression	0.0308034	0.247833	0.219518
GO:0014904	myotube cell development	32	-0.467167	-1.51799	regression	0.0308195	0.247833	0.219518
GO:0006182	cGMP biosynthetic process	36	-0.450578	-1.50437	regression	0.0309484	0.24825	0.219888
GO:1905332	positive regulation of morphogenesis of an epithelium	27	0.500823	1.53378	regression	0.0309866	0.24825	0.219888
GO:0044331	cell-cell adhesion mediated by cadherin	31	-0.471567	-1.52099	regression	0.0310119	0.24825	0.219888
GO:0061138	morphogenesis of a branching epithelium	159	0.315017	1.33608	regression	0.0310782	0.24825	0.219888
GO:0002446	neutrophil mediated immunity	417	0.262709	1.23895	regression	0.0310845	0.24825	0.219888
GO:0007158	neuron cell-cell adhesion	15	-0.588818	-1.58172	regression	0.0312316	0.248931	0.220491
GO:0045980	negative regulation of nucleotide metabolic process	46	-0.41852	-1.47398	regression	0.0312553	0.248931	0.220491
GO:0030166	proteoglycan biosynthetic process	57	-0.393199	-1.44667	regression	0.031411	0.249622	0.221103
GO:0099003	vesicle-mediated transport in synapse	125	-0.319917	-1.34967	regression	0.0314345	0.249622	0.221103
GO:0051302	regulation of cell division	129	0.329808	1.35851	regression	0.0314708	0.249622	0.221103
GO:0006730	one-carbon metabolic process	31	0.479982	1.51717	regression	0.0316961	0.250749	0.222101
GO:0042035	regulation of cytokine biosynthetic process	80	-0.357681	-1.40258	regression	0.0316989	0.250749	0.222101
GO:0006892	post-Golgi vesicle-mediated transport	85	0.363942	1.40425	regression	0.0318039	0.251238	0.222534
GO:0045137	development of primary sexual characteristics	186	0.304094	1.31615	regression	0.0320958	0.253028	0.224119
GO:0045026	plasma membrane fusion	31	-0.469866	-1.5155	regression	0.0321324	0.253028	0.224119
GO:0090287	regulation of cellular response to growth factor stimulus	224	-0.280548	-1.28051	regression	0.0322051	0.253028	0.224119
GO:0090195	chemokine secretion	13	0.618918	1.57564	regression	0.0323469	0.253028	0.224119
GO:0055072	iron ion homeostasis	80	0.368644	1.40777	regression	0.0323836	0.253028	0.224119
GO:0055010	ventricular cardiac muscle tissue morphogenesis	47	0.425122	1.46952	regression	0.0324038	0.253028	0.224119
GO:0030325	adrenal gland development	18	-0.555067	-1.56459	regression	0.0324521	0.253028	0.224119
GO:0050818	regulation of coagulation	64	-0.379584	-1.42834	regression	0.032466	0.253028	0.224119
GO:0008406	gonad development	180	0.305848	1.31838	regression	0.032497	0.253028	0.224119
GO:0036159	inner dynein arm assembly	16	0.582604	1.56676	regression	0.0325032	0.253028	0.224119
GO:0001702	gastrulation with mouth forming second	23	-0.514761	-1.54511	regression	0.0325085	0.253028	0.224119
GO:0006884	cell volume homeostasis	22	0.529771	1.54417	regression	0.0325854	0.253264	0.224329
GO:0031623	receptor internalization	82	-0.354795	-1.39726	regression	0.032643	0.253264	0.224329
GO:0014821	phasic smooth muscle contraction	15	-0.586366	-1.57514	regression	0.0326968	0.253264	0.224329
GO:0045861	negative regulation of proteolysis	281	0.280274	1.27224	regression	0.0327129	0.253264	0.224329
GO:0042119	neutrophil activation	416	0.262003	1.23535	regression	0.032803	0.253625	0.224648
GO:1901019	regulation of calcium ion transmembrane transporter activity	81	-0.355495	-1.39698	regression	0.0329064	0.253985	0.224967
GO:0098869	cellular oxidant detoxification	84	0.363844	1.4009	regression	0.0329792	0.253985	0.224967
GO:0097048	dendritic cell apoptotic process	10	-0.660704	-1.58405	regression	0.0330241	0.253985	0.224967
GO:2000668	regulation of dendritic cell apoptotic process	10	-0.660704	-1.58405	regression	0.0330241	0.253985	0.224967
GO:0008299	isoprenoid biosynthetic process	27	-0.489229	-1.52695	regression	0.0330915	0.254167	0.225129
GO:0072332	intrinsic apoptotic signaling pathway by p53 class mediator	75	0.374051	1.41265	regression	0.033274	0.255232	0.226072
GO:0040017	positive regulation of locomotion	428	-0.248299	-1.21268	regression	0.033321	0.255257	0.226094
GO:0046627	negative regulation of insulin receptor signaling pathway	27	-0.488669	-1.52521	regression	0.0334907	0.256219	0.226946
GO:0035418	protein localization to synapse	33	-0.459064	-1.50235	regression	0.0336478	0.257083	0.227712
GO:0071294	cellular response to zinc ion	16	0.580692	1.56162	regression	0.0337216	0.25731	0.227912
GO:0061000	negative regulation of dendritic spine development	10	-0.65932	-1.58073	regression	0.0338909	0.258092	0.228605
GO:1900452	regulation of long term synaptic depression	11	-0.641232	-1.57996	regression	0.0339377	0.258092	0.228605
GO:0051592	response to calcium ion	109	-0.328877	-1.35852	regression	0.0339571	0.258092	0.228605
GO:1902855	regulation of non-motile cilium assembly	10	0.664283	1.57499	regression	0.0340417	0.258398	0.228876
GO:0062014	negative regulation of small molecule metabolic process	101	-0.33493	-1.36629	regression	0.0341715	0.259045	0.229449
GO:0050796	regulation of insulin secretion	155	-0.302309	-1.31585	regression	0.0342279	0.259135	0.229529
GO:0071622	regulation of granulocyte chemotaxis	35	-0.44955	-1.49108	regression	0.0346893	0.262287	0.232321
GO:0014856	skeletal muscle cell proliferation	14	0.602331	1.56412	regression	0.0348892	0.263457	0.233357
GO:1901888	regulation of cell junction assembly	73	0.375143	1.40971	regression	0.0349683	0.263618	0.2335
GO:0042738	exogenous drug catabolic process	18	-0.551069	-1.55332	regression	0.0350115	0.263618	0.2335
GO:0097150	neuronal stem cell population maintenance	21	0.533641	1.5376	regression	0.0351175	0.263618	0.2335
GO:0021675	nerve development	68	-0.370822	-1.41132	regression	0.0351473	0.263618	0.2335
GO:0045668	negative regulation of osteoblast differentiation	34	0.463237	1.49518	regression	0.0351767	0.263618	0.2335
GO:0010939	regulation of necrotic cell death	21	0.533558	1.53736	regression	0.0351823	0.263618	0.2335
GO:0022612	gland morphogenesis	102	0.345424	1.37313	regression	0.0353414	0.26447	0.234255
GO:0034308	primary alcohol metabolic process	48	0.419319	1.45541	regression	0.0355017	0.265329	0.235015
GO:0021781	glial cell fate commitment	12	0.628309	1.56533	regression	0.03577	0.266842	0.236356
GO:0032890	regulation of organic acid transport	47	-0.411106	-1.45433	regression	0.0357959	0.266842	0.236356
GO:0061512	protein localization to cilium	32	0.470242	1.49726	regression	0.0358566	0.266953	0.236454
GO:0097120	receptor localization to synapse	32	-0.460445	-1.49615	regression	0.0360875	0.268329	0.237673
GO:0002437	inflammatory response to antigenic stimulus	36	-0.44408	-1.48267	regression	0.036214	0.268715	0.238014
GO:0030262	apoptotic nuclear changes	26	0.49962	1.51654	regression	0.0362317	0.268715	0.238014
GO:0060972	left/right pattern formation	20	0.539674	1.53612	regression	0.0363642	0.269195	0.23844
GO:0099172	presynapse organization	19	-0.54053	-1.54555	regression	0.0363889	0.269195	0.23844
GO:0007623	circadian rhythm	176	-0.292875	-1.29661	regression	0.0364918	0.269613	0.23881
GO:0007618	mating	32	-0.45967	-1.49363	regression	0.0367143	0.270634	0.239714
GO:0006048	UDP-N-acetylglucosamine biosynthetic process	10	0.660068	1.565	regression	0.0367673	0.270634	0.239714
GO:0021952	central nervous system projection neuron axonogenesis	23	-0.50858	-1.52656	regression	0.0368954	0.270634	0.239714
GO:1903725	regulation of phospholipid metabolic process	63	-0.376956	-1.41417	regression	0.0369116	0.270634	0.239714
GO:1905276	regulation of epithelial tube formation	15	0.587106	1.55258	regression	0.0369916	0.270634	0.239714
GO:0009267	cellular response to starvation	126	0.327668	1.3451	regression	0.0369963	0.270634	0.239714
GO:0043651	linoleic acid metabolic process	16	0.575727	1.54827	regression	0.0370431	0.270634	0.239714
GO:0045123	cellular extravasation	39	-0.43258	-1.47014	regression	0.0370834	0.270634	0.239714
GO:0002067	glandular epithelial cell differentiation	37	0.449868	1.47909	regression	0.0371028	0.270634	0.239714
GO:0060767	epithelial cell proliferation involved in prostate gland development	11	0.641646	1.56178	regression	0.0371399	0.270634	0.239714
GO:0060193	positive regulation of lipase activity	52	-0.397745	-1.43675	regression	0.0371503	0.270634	0.239714
GO:0051259	protein complex oligomerization	464	0.255837	1.21763	regression	0.0371877	0.270634	0.239714
GO:0031670	cellular response to nutrient	55	-0.391317	-1.42962	regression	0.037327	0.271292	0.240297
GO:0007229	integrin-mediated signaling pathway	87	0.357098	1.38325	regression	0.0373736	0.271292	0.240297
GO:0050880	regulation of blood vessel size	121	-0.318246	-1.33603	regression	0.0374179	0.271292	0.240297
GO:0052548	regulation of endopeptidase activity	332	0.269734	1.24521	regression	0.0375593	0.271895	0.240832
GO:1900273	positive regulation of long-term synaptic potentiation	15	-0.578998	-1.55535	regression	0.0375946	0.271895	0.240832
GO:0001659	temperature homeostasis	33	-0.454316	-1.48681	regression	0.0376646	0.272064	0.240981
GO:0036230	granulocyte activation	421	0.259504	1.22489	regression	0.0379045	0.273146	0.241939
GO:0045746	negative regulation of Notch signaling pathway	32	-0.458365	-1.48939	regression	0.0379082	0.273146	0.241939
GO:0042102	positive regulation of T cell proliferation	78	-0.355043	-1.38581	regression	0.0380615	0.273832	0.242547
GO:0019370	leukotriene biosynthetic process	14	-0.590973	-1.55763	regression	0.0381313	0.273832	0.242547
GO:0050951	sensory perception of temperature stimulus	16	-0.566631	-1.54863	regression	0.0381495	0.273832	0.242547
GO:0034329	cell junction assembly	205	0.294673	1.29075	regression	0.0381916	0.273832	0.242547
GO:0001768	establishment of T cell polarity	10	-0.65192	-1.56299	regression	0.0384647	0.275451	0.243981
GO:0060688	regulation of morphogenesis of a branching structure	46	0.421142	1.44913	regression	0.0385522	0.275722	0.244221
GO:0045724	positive regulation of cilium assembly	19	0.544915	1.53127	regression	0.0385973	0.275722	0.244221
GO:0043543	protein acylation	209	0.293259	1.2875	regression	0.0386971	0.275766	0.24426
GO:0032368	regulation of lipid transport	88	-0.343614	-1.36995	regression	0.0387262	0.275766	0.24426
GO:0051225	spindle assembly	92	0.35122	1.37311	regression	0.0387456	0.275766	0.24426
GO:0036065	fucosylation	27	-0.481604	-1.50315	regression	0.0388329	0.27605	0.244512
GO:0045745	positive regulation of G-protein coupled receptor protein signaling pathway	24	0.507875	1.5123	regression	0.0389614	0.276564	0.244967
GO:0030950	establishment or maintenance of actin cytoskeleton polarity	12	0.623576	1.55354	regression	0.0390002	0.276564	0.244967
GO:0009112	nucleobase metabolic process	35	0.454645	1.47731	regression	0.0392495	0.277993	0.246233
GO:0015800	acidic amino acid transport	56	-0.387465	-1.42069	regression	0.039331	0.278061	0.246293
GO:0035150	regulation of tube size	122	-0.31622	-1.32919	regression	0.0393546	0.278061	0.246293
GO:0046579	positive regulation of Ras protein signal transduction	44	-0.415031	-1.44823	regression	0.0394906	0.278684	0.246845
GO:0051932	synaptic transmission, GABAergic	42	-0.420708	-1.45349	regression	0.0395809	0.278983	0.247109
GO:0006904	vesicle docking involved in exocytosis	46	-0.409374	-1.44177	regression	0.0398051	0.279645	0.247696
GO:0051607	defense response to virus	182	0.300861	1.29873	regression	0.0398081	0.279645	0.247696
GO:2001236	regulation of extrinsic apoptotic signaling pathway	134	0.321251	1.33066	regression	0.0398189	0.279645	0.247696
GO:1904874	positive regulation of telomerase RNA localization to Cajal body	15	-0.575579	-1.54616	regression	0.0400143	0.280679	0.248612
GO:0019048	modulation by virus of host morphology or physiology	34	0.457135	1.47549	regression	0.0404572	0.283252	0.250891
GO:0031062	positive regulation of histone methylation	32	0.464986	1.48052	regression	0.0404785	0.283252	0.250891
GO:0072216	positive regulation of metanephros development	11	-0.631262	-1.5554	regression	0.0406403	0.284043	0.251591
GO:0001525	angiogenesis	427	-0.245635	-1.19938	regression	0.0409579	0.28592	0.253253
GO:0070665	positive regulation of leukocyte proliferation	114	-0.320391	-1.33286	regression	0.0411493	0.286912	0.254132
GO:0010676	positive regulation of cellular carbohydrate metabolic process	47	-0.40539	-1.43411	regression	0.0413509	0.287973	0.255072
GO:0001763	morphogenesis of a branching structure	170	0.30431	1.30209	regression	0.0414829	0.288099	0.255184
GO:0033008	positive regulation of mast cell activation involved in immune response	12	-0.613578	-1.5502	regression	0.0415246	0.288099	0.255184
GO:0043306	positive regulation of mast cell degranulation	12	-0.613578	-1.5502	regression	0.0415246	0.288099	0.255184
GO:2000404	regulation of T cell migration	28	-0.473071	-1.48982	regression	0.0415671	0.288099	0.255184
GO:0001654	eye development	306	-0.259868	-1.22855	regression	0.041628	0.288179	0.255255
GO:0016082	synaptic vesicle priming	15	-0.573134	-1.53959	regression	0.0418213	0.288872	0.255868
GO:0015696	ammonium transport	84	-0.345148	-1.36492	regression	0.0418596	0.288872	0.255868
GO:0000041	transition metal ion transport	98	0.343815	1.35798	regression	0.041877	0.288872	0.255868
GO:0042074	cell migration involved in gastrulation	11	-0.629327	-1.55063	regression	0.0420694	0.289856	0.25674
GO:0030048	actin filament-based movement	116	0.330397	1.33962	regression	0.0421422	0.290014	0.25688
GO:0035308	negative regulation of protein dephosphorylation	45	-0.409727	-1.43669	regression	0.0422	0.290066	0.256926
GO:0042752	regulation of circadian rhythm	87	-0.342024	-1.36082	regression	0.0422494	0.290066	0.256926
GO:0007548	sex differentiation	225	0.287277	1.27246	regression	0.0423503	0.290416	0.257236
GO:0018410	C-terminal protein amino acid modification	65	-0.369174	-1.39324	regression	0.0426428	0.292078	0.258708
GO:0071277	cellular response to calcium ion	55	-0.386573	-1.4123	regression	0.0427391	0.292335	0.258936
GO:0046928	regulation of neurotransmitter secretion	50	-0.396921	-1.42256	regression	0.0427807	0.292335	0.258936
GO:0031665	negative regulation of lipopolysaccharide-mediated signaling pathway	10	-0.645504	-1.5476	regression	0.0429827	0.293059	0.259577
GO:0072522	purine-containing compound biosynthetic process	261	-0.267248	-1.24171	regression	0.0429874	0.293059	0.259577
GO:0035721	intraciliary retrograde transport	11	0.633164	1.54113	regression	0.0431434	0.293551	0.260013
GO:0018208	peptidyl-proline modification	42	0.427625	1.44413	regression	0.043241	0.293551	0.260013
GO:0035821	modification of morphology or physiology of other organism	128	0.322484	1.32683	regression	0.0432542	0.293551	0.260013
GO:0042073	intraciliary transport	44	0.421927	1.43858	regression	0.043299	0.293551	0.260013
GO:1900363	regulation of mRNA polyadenylation	11	0.632943	1.5406	regression	0.0433116	0.293551	0.260013
GO:0061001	regulation of dendritic spine morphogenesis	35	-0.439414	-1.45746	regression	0.0439743	0.297274	0.263311
GO:0000466	maturation of 5.8S rRNA from tricistronic rRNA transcript (SSU-rRNA, 5.8S rRNA, LSU-rRNA)	20	0.529893	1.50828	regression	0.0440819	0.297274	0.263311
GO:0061647	histone H3-K9 modification	37	0.442581	1.45513	regression	0.0441506	0.297274	0.263311
GO:0060439	trachea morphogenesis	11	0.631844	1.53792	regression	0.0441526	0.297274	0.263311
GO:0015669	gas transport	17	0.556295	1.52	regression	0.0441534	0.297274	0.263311
GO:2000060	positive regulation of ubiquitin-dependent protein catabolic process	87	-0.340709	-1.35559	regression	0.0441673	0.297274	0.263311
GO:0043011	myeloid dendritic cell differentiation	16	-0.558486	-1.52637	regression	0.0442307	0.297338	0.263368
GO:0008625	extrinsic apoptotic signaling pathway via death domain receptors	67	0.376027	1.39175	regression	0.0442867	0.297338	0.263368
GO:0032507	maintenance of protein location in cell	69	0.373135	1.38835	regression	0.0443301	0.297338	0.263368
GO:0030307	positive regulation of cell growth	139	-0.303963	-1.30247	regression	0.0444294	0.297662	0.263654
GO:0009314	response to radiation	383	-0.248911	-1.20336	regression	0.0448255	0.29997	0.265699
GO:0006023	aminoglycan biosynthetic process	98	-0.329993	-1.33974	regression	0.0449647	0.300556	0.266218
GO:0021537	telencephalon development	219	-0.27551	-1.25406	regression	0.0451731	0.301486	0.267041
GO:0045899	positive regulation of RNA polymerase II transcriptional preinitiation complex assembly	11	-0.624896	-1.53971	regression	0.045224	0.301486	0.267041
GO:0006534	cysteine metabolic process	13	0.600316	1.52829	regression	0.0452591	0.301486	0.267041
GO:0061029	eyelid development in camera-type eye	13	-0.593627	-1.53378	regression	0.0453999	0.302078	0.267566
GO:0042573	retinoic acid metabolic process	16	-0.556778	-1.52171	regression	0.0455568	0.302776	0.268184
GO:0032104	regulation of response to extracellular stimulus	20	0.528001	1.5029	regression	0.0457089	0.303095	0.268467
GO:0032107	regulation of response to nutrient levels	20	0.528001	1.5029	regression	0.0457089	0.303095	0.268467
GO:0010667	negative regulation of cardiac muscle cell apoptotic process	19	0.535781	1.5056	regression	0.0458147	0.303451	0.268782
GO:0007342	fusion of sperm to egg plasma membrane involved in single fertilization	11	-0.623934	-1.53734	regression	0.0459034	0.303692	0.268996
GO:1900077	negative regulation of cellular response to insulin stimulus	28	-0.468163	-1.47436	regression	0.0460253	0.304154	0.269404
GO:0035561	regulation of chromatin binding	21	0.519888	1.49797	regression	0.0461364	0.304542	0.269748
GO:2000050	regulation of non-canonical Wnt signaling pathway	19	0.535294	1.50423	regression	0.0462408	0.304885	0.270052
GO:0046651	lymphocyte proliferation	211	-0.277091	-1.25565	regression	0.0463015	0.30494	0.270101
GO:0001767	establishment of lymphocyte polarity	11	-0.623232	-1.53561	regression	0.0465144	0.305555	0.270646
GO:0010970	transport along microtubule	131	0.318727	1.31592	regression	0.0465523	0.305555	0.270646
GO:0099111	microtubule-based transport	131	0.318727	1.31592	regression	0.0465523	0.305555	0.270646
GO:0072243	metanephric nephron epithelium development	22	-0.503711	-1.49547	regression	0.0466882	0.306102	0.271131
GO:0009746	response to hexose	176	-0.287582	-1.27317	regression	0.0469809	0.307524	0.27239
GO:0007098	centrosome cycle	101	0.338091	1.34188	regression	0.0470108	0.307524	0.27239
GO:0006883	cellular sodium ion homeostasis	14	0.585604	1.52068	regression	0.0470752	0.307601	0.272457
GO:0032787	monocarboxylic acid metabolic process	495	0.250255	1.19738	regression	0.0471675	0.307858	0.272685
GO:0021795	cerebral cortex cell migration	39	-0.422544	-1.43604	regression	0.0472711	0.307947	0.272764
GO:0097286	iron ion import	14	0.585362	1.52005	regression	0.047287	0.307947	0.272764
GO:0090196	regulation of chemokine secretion	11	0.627704	1.52784	regression	0.0473564	0.308055	0.27286
GO:1904037	positive regulation of epithelial cell apoptotic process	23	0.504276	1.48625	regression	0.0475137	0.308392	0.273159
GO:0032649	regulation of interferon-gamma production	75	-0.351581	-1.36253	regression	0.0475142	0.308392	0.273159
GO:0045682	regulation of epidermis development	67	0.373583	1.3827	regression	0.0475695	0.308407	0.273172
GO:0045860	positive regulation of protein kinase activity	460	-0.240654	-1.18289	regression	0.0476418	0.308412	0.273176
GO:0071242	cellular response to ammonium ion	52	-0.388364	-1.40287	regression	0.0477628	0.308412	0.273176
GO:0050792	regulation of viral process	179	0.297847	1.28295	regression	0.0477873	0.308412	0.273176
GO:0033158	regulation of protein import into nucleus, translocation	18	-0.53444	-1.50645	regression	0.0478083	0.308412	0.273176
GO:0043114	regulation of vascular permeability	30	-0.456768	-1.46223	regression	0.0478351	0.308412	0.273176
GO:0009074	aromatic amino acid family catabolic process	17	0.551752	1.50759	regression	0.0479304	0.308685	0.273418
GO:0051591	response to cAMP	89	-0.336236	-1.34317	regression	0.0480008	0.308796	0.273516
GO:0090330	regulation of platelet aggregation	15	-0.565086	-1.51797	regression	0.0481302	0.309287	0.273951
GO:0018958	phenol-containing compound metabolic process	77	-0.348767	-1.35811	regression	0.0482483	0.309704	0.274321
GO:0043113	receptor clustering	44	-0.406801	-1.41952	regression	0.0484425	0.309827	0.274429
GO:0033077	T cell differentiation in thymus	59	-0.374561	-1.38756	regression	0.0484612	0.309827	0.274429
GO:0014029	neural crest formation	11	0.626388	1.52464	regression	0.0484739	0.309827	0.274429
GO:0006690	icosanoid metabolic process	87	-0.337859	-1.34425	regression	0.0484803	0.309827	0.274429
GO:0006936	muscle contraction	294	-0.259211	-1.22031	regression	0.0485781	0.310111	0.274682
GO:0007030	Golgi organization	116	0.326221	1.32268	regression	0.0490045	0.312491	0.276789
GO:0006309	apoptotic DNA fragmentation	19	0.532028	1.49505	regression	0.0490681	0.312554	0.276845
GO:1901216	positive regulation of neuron death	71	-0.355636	-1.36457	regression	0.0493095	0.313352	0.277552
GO:0090178	regulation of establishment of planar polarity involved in neural tube closure	12	0.609567	1.51864	regression	0.0494597	0.313352	0.277552
GO:0032943	mononuclear cell proliferation	213	-0.275327	-1.24891	regression	0.0494963	0.313352	0.277552
GO:0043620	regulation of DNA-templated transcription in response to stress	110	-0.318247	-1.31649	regression	0.049504	0.313352	0.277552
GO:0032366	intracellular sterol transport	17	0.54987	1.50245	regression	0.0495163	0.313352	0.277552
GO:0032367	intracellular cholesterol transport	17	0.54987	1.50245	regression	0.0495163	0.313352	0.277552
GO:1904294	positive regulation of ERAD pathway	13	0.595002	1.51476	regression	0.0496557	0.313893	0.278031
GO:0031023	microtubule organizing center organization	110	0.329782	1.32643	regression	0.0498034	0.314485	0.278556
GO:0051044	positive regulation of membrane protein ectodomain proteolysis	12	-0.602797	-1.52296	regression	0.0498726	0.314581	0.278641
GO:0035810	positive regulation of urine volume	12	-0.602561	-1.52237	regression	0.0500613	0.315372	0.279341
GO:2000786	positive regulation of autophagosome assembly	10	0.641757	1.52158	regression	0.0501064	0.315372	0.279341
GO:0070861	regulation of protein exit from endoplasmic reticulum	21	0.515276	1.48468	regression	0.0502506	0.315938	0.279843
GO:0071071	regulation of phospholipid biosynthetic process	12	-0.601969	-1.52087	regression	0.0505857	0.317702	0.281405
GO:0070493	thrombin-activated receptor signaling pathway	10	-0.635336	-1.52323	regression	0.0508664	0.319121	0.282661
GO:0061036	positive regulation of cartilage development	24	0.494051	1.47114	regression	0.051253	0.320798	0.284147
GO:0048608	reproductive structure development	364	0.260767	1.21445	regression	0.0512543	0.320798	0.284147
GO:0090101	negative regulation of transmembrane receptor protein serine/threonine kinase signaling pathway	97	0.338526	1.33505	regression	0.0513916	0.320798	0.284147
GO:0060411	cardiac septum morphogenesis	62	0.378303	1.38049	regression	0.0514137	0.320798	0.284147
GO:0001967	suckling behavior	10	-0.634648	-1.52158	regression	0.0515242	0.320798	0.284147
GO:0052547	regulation of peptidase activity	355	0.261757	1.21617	regression	0.0515665	0.320798	0.284147
GO:1901685	glutathione derivative metabolic process	19	0.529268	1.48729	regression	0.0515745	0.320798	0.284147
GO:1901687	glutathione derivative biosynthetic process	19	0.529268	1.48729	regression	0.0515745	0.320798	0.284147
GO:1901623	regulation of lymphocyte chemotaxis	17	-0.539031	-1.49682	regression	0.0518633	0.32225	0.285433
GO:1904892	regulation of STAT cascade	124	-0.307898	-1.29751	regression	0.052004	0.32278	0.285903
GO:0048813	dendrite morphogenesis	123	-0.30829	-1.2975	regression	0.0524279	0.325064	0.287926
GO:0071392	cellular response to estradiol stimulus	32	-0.443406	-1.44078	regression	0.0524844	0.325068	0.287929
GO:0030866	cortical actin cytoskeleton organization	35	0.441374	1.43419	regression	0.0527537	0.325741	0.288525
GO:0006692	prostanoid metabolic process	32	-0.443131	-1.43988	regression	0.0527892	0.325741	0.288525
GO:0006693	prostaglandin metabolic process	32	-0.443131	-1.43988	regression	0.0527892	0.325741	0.288525
GO:0006369	termination of RNA polymerase II transcription	66	0.371435	1.37109	regression	0.0528411	0.325741	0.288525
GO:0030279	negative regulation of ossification	59	0.382402	1.38222	regression	0.0529101	0.325741	0.288525
GO:0002704	negative regulation of leukocyte mediated immunity	38	-0.42104	-1.42289	regression	0.0529287	0.325741	0.288525
GO:0046597	negative regulation of viral entry into host cell	16	0.555724	1.49447	regression	0.0530271	0.325872	0.288642
GO:0061756	leukocyte adhesion to vascular endothelial cell	23	-0.490018	-1.47084	regression	0.053062	0.325872	0.288642
GO:0060977	coronary vasculature morphogenesis	14	0.578499	1.50223	regression	0.0531192	0.32588	0.288648
GO:0071377	cellular response to glucagon stimulus	33	-0.438513	-1.43509	regression	0.0532303	0.325973	0.288731
GO:0030952	establishment or maintenance of cytoskeleton polarity	16	0.555412	1.49364	regression	0.0533341	0.325973	0.288731
GO:0050829	defense response to Gram-negative bacterium	55	-0.378425	-1.38253	regression	0.0534478	0.325973	0.288731
GO:0046683	response to organophosphorus	115	-0.312676	-1.30258	regression	0.0534608	0.325973	0.288731
GO:0045662	negative regulation of myoblast differentiation	21	0.511956	1.47512	regression	0.053521	0.325973	0.288731
GO:0014013	regulation of gliogenesis	96	0.338265	1.33171	regression	0.0535456	0.325973	0.288731
GO:0030947	regulation of vascular endothelial growth factor receptor signaling pathway	28	-0.460642	-1.45068	regression	0.0536009	0.325973	0.288731
GO:0048739	cardiac muscle fiber development	10	0.637623	1.51178	regression	0.0536255	0.325973	0.288731
GO:0099624	atrial cardiac muscle cell membrane repolarization	10	-0.632063	-1.51538	regression	0.0536384	0.325973	0.288731
GO:0090278	negative regulation of peptide hormone secretion	39	-0.416829	-1.41661	regression	0.0538409	0.326131	0.288871
GO:0010951	negative regulation of endopeptidase activity	193	0.290951	1.26509	regression	0.0538422	0.326131	0.288871
GO:0090197	positive regulation of chemokine secretion	10	0.637367	1.51117	regression	0.0538675	0.326131	0.288871
GO:0060831	smoothened signaling pathway involved in dorsal/ventral neural tube patterning	13	0.590056	1.50217	regression	0.0538884	0.326131	0.288871
GO:1900027	regulation of ruffle assembly	25	0.485664	1.46019	regression	0.0539615	0.326235	0.288963
GO:0019731	antibacterial humoral response	32	-0.441957	-1.43607	regression	0.0541302	0.326512	0.289208
GO:0014855	striated muscle cell proliferation	59	0.381513	1.37901	regression	0.0541941	0.326512	0.289208
GO:0002864	regulation of acute inflammatory response to antigenic stimulus	12	-0.597506	-1.5096	regression	0.0543835	0.326512	0.289208
GO:0010257	NADH dehydrogenase complex assembly	53	-0.381329	-1.38273	regression	0.0543892	0.326512	0.289208
GO:0032981	mitochondrial respiratory chain complex I assembly	53	-0.381329	-1.38273	regression	0.0543892	0.326512	0.289208
GO:0030865	cortical cytoskeleton organization	45	0.410158	1.4049	regression	0.054407	0.326512	0.289208
GO:0001516	prostaglandin biosynthetic process	21	-0.502639	-1.4747	regression	0.0544576	0.326512	0.289208
GO:0046457	prostanoid biosynthetic process	21	-0.502639	-1.4747	regression	0.0544576	0.326512	0.289208
GO:0002065	columnar/cuboidal epithelial cell differentiation	96	0.337588	1.32904	regression	0.0547132	0.326512	0.289208
GO:0048486	parasympathetic nervous system development	17	-0.535832	-1.48794	regression	0.0547363	0.326512	0.289208
GO:0045843	negative regulation of striated muscle tissue development	42	0.417721	1.41068	regression	0.0547908	0.326512	0.289208
GO:1901841	regulation of high voltage-gated calcium channel activity	12	-0.596934	-1.50815	regression	0.0548396	0.326512	0.289208
GO:0043970	histone H3-K9 acetylation	11	0.618751	1.50605	regression	0.0549104	0.326512	0.289208
GO:0042310	vasoconstriction	68	-0.356142	-1.35545	regression	0.0549729	0.326512	0.289208
GO:0071715	icosanoid transport	39	-0.416004	-1.41381	regression	0.0549795	0.326512	0.289208
GO:1901571	fatty acid derivative transport	39	-0.416004	-1.41381	regression	0.0549795	0.326512	0.289208
GO:0043302	positive regulation of leukocyte degranulation	18	-0.526585	-1.48431	regression	0.0549812	0.326512	0.289208
GO:0048635	negative regulation of muscle organ development	43	0.414889	1.40805	regression	0.0550168	0.326512	0.289208
GO:0021988	olfactory lobe development	27	-0.464374	-1.44938	regression	0.0552268	0.32727	0.28988
GO:1903429	regulation of cell maturation	16	-0.545726	-1.4915	regression	0.055257	0.32727	0.28988
GO:0048745	smooth muscle tissue development	19	0.525309	1.47617	regression	0.0554163	0.327788	0.290339
GO:0007051	spindle organization	144	0.308126	1.28921	regression	0.0554571	0.327788	0.290339
GO:0072283	metanephric renal vesicle morphogenesis	14	0.575381	1.49414	regression	0.0558967	0.329613	0.291955
GO:0032105	negative regulation of response to extracellular stimulus	13	0.587734	1.49626	regression	0.0559584	0.329613	0.291955
GO:0032108	negative regulation of response to nutrient levels	13	0.587734	1.49626	regression	0.0559584	0.329613	0.291955
GO:0006120	mitochondrial electron transport, NADH to ubiquinone	39	-0.415144	-1.41089	regression	0.0560409	0.329613	0.291955
GO:0046686	response to cadmium ion	53	0.390809	1.38384	regression	0.0560489	0.329613	0.291955
GO:0018105	peptidyl-serine phosphorylation	252	-0.264176	-1.22267	regression	0.0562568	0.330502	0.292742
GO:0070050	neuron cellular homeostasis	10	-0.628844	-1.50766	regression	0.0563566	0.330754	0.292966
GO:0060732	positive regulation of inositol phosphate biosynthetic process	10	-0.628583	-1.50704	regression	0.0565759	0.331658	0.293767
GO:0030203	glycosaminoglycan metabolic process	137	-0.298949	-1.27848	regression	0.0566439	0.331658	0.293767
GO:0006623	protein targeting to vacuole	27	0.472226	1.4462	regression	0.0566881	0.331658	0.293767
GO:0071774	response to fibroblast growth factor	128	-0.303408	-1.28471	regression	0.0567385	0.331658	0.293767
GO:0003337	mesenchymal to epithelial transition involved in metanephros morphogenesis	13	0.586582	1.49332	regression	0.0570079	0.332642	0.294638
GO:0010881	regulation of cardiac muscle contraction by regulation of the release of sequestered calcium ion	18	0.532648	1.47672	regression	0.057021	0.332642	0.294638
GO:1901862	negative regulation of muscle tissue development	44	0.410517	1.39967	regression	0.0572368	0.333566	0.295457
GO:0060070	canonical Wnt signaling pathway	272	-0.2601	-1.21396	regression	0.0573567	0.333931	0.29578
GO:0010664	negative regulation of striated muscle cell apoptotic process	22	0.50091	1.46004	regression	0.0574346	0.33405	0.295885
GO:0048791	calcium ion-regulated exocytosis of neurotransmitter	30	-0.447822	-1.43359	regression	0.0575431	0.334257	0.296069
GO:2000674	regulation of type B pancreatic cell apoptotic process	10	0.633007	1.50084	regression	0.0576247	0.334257	0.296069
GO:0048368	lateral mesoderm development	15	-0.554101	-1.48847	regression	0.0576424	0.334257	0.296069
GO:0048557	embryonic digestive tract morphogenesis	18	-0.52375	-1.47632	regression	0.0577753	0.334695	0.296456
GO:0006520	cellular amino acid metabolic process	317	0.264547	1.21568	regression	0.0578605	0.334855	0.296598
GO:0033189	response to vitamin A	16	-0.5429	-1.48377	regression	0.0579677	0.335142	0.296852
GO:0097503	sialylation	17	-0.532271	-1.47805	regression	0.0581555	0.335894	0.297519
GO:0061311	cell surface receptor signaling pathway involved in heart development	21	0.507284	1.46165	regression	0.0582695	0.336219	0.297806
GO:0010863	positive regulation of phospholipase C activity	28	-0.456176	-1.43661	regression	0.0584502	0.336928	0.298434
GO:0042403	thyroid hormone metabolic process	15	-0.552962	-1.4854	regression	0.0588158	0.338231	0.299589
GO:0006706	steroid catabolic process	19	0.521972	1.46679	regression	0.0588321	0.338231	0.299589
GO:0016239	positive regulation of macroautophagy	55	0.385215	1.37372	regression	0.0588506	0.338231	0.299589
GO:0097178	ruffle assembly	35	0.436193	1.41736	regression	0.0590544	0.338512	0.299837
GO:0008037	cell recognition	119	-0.307508	-1.28764	regression	0.059105	0.338512	0.299837
GO:0010878	cholesterol storage	13	0.584264	1.48742	regression	0.059132	0.338512	0.299837
GO:0010885	regulation of cholesterol storage	13	0.584264	1.48742	regression	0.059132	0.338512	0.299837
GO:0006835	dicarboxylic acid transport	80	-0.338691	-1.32811	regression	0.059436	0.339742	0.300927
GO:0002705	positive regulation of leukocyte mediated immunity	82	-0.336447	-1.325	regression	0.0594636	0.339742	0.300927
GO:0060560	developmental growth involved in morphogenesis	204	-0.273992	-1.2364	regression	0.0595361	0.339823	0.300998
GO:0034284	response to monosaccharide	180	-0.280875	-1.24707	regression	0.0596147	0.339938	0.3011
GO:0009154	purine ribonucleotide catabolic process	30	-0.446075	-1.428	regression	0.0596938	0.340056	0.301205
GO:0003177	pulmonary valve development	12	0.597705	1.48909	regression	0.0598748	0.340263	0.301388
GO:0003184	pulmonary valve morphogenesis	12	0.597705	1.48909	regression	0.0598748	0.340263	0.301388
GO:0048814	regulation of dendrite morphogenesis	75	-0.344077	-1.33345	regression	0.0599054	0.340263	0.301388
GO:0030168	platelet activation	138	-0.296956	-1.27121	regression	0.0600904	0.340746	0.301816
GO:0090179	planar cell polarity pathway involved in neural tube closure	11	0.612868	1.49173	regression	0.0601076	0.340746	0.301816
GO:0070663	regulation of leukocyte proliferation	180	-0.280603	-1.24586	regression	0.0603228	0.341634	0.302602
GO:0021783	preganglionic parasympathetic fiber development	15	-0.551313	-1.48098	regression	0.0604602	0.342079	0.302997
GO:0019229	regulation of vasoconstriction	55	-0.373352	-1.36399	regression	0.0607678	0.343173	0.303966
GO:0070125	mitochondrial translational elongation	80	-0.337968	-1.32527	regression	0.0607714	0.343173	0.303966
GO:0014074	response to purine-containing compound	131	-0.299923	-1.27416	regression	0.0614152	0.346086	0.306546
GO:0050708	regulation of protein secretion	362	-0.246386	-1.1849	regression	0.061504	0.346086	0.306546
GO:0072182	regulation of nephron tubule epithelial cell differentiation	11	-0.605539	-1.49202	regression	0.0616305	0.346086	0.306546
GO:0042475	odontogenesis of dentin-containing tooth	69	0.36174	1.34595	regression	0.0616709	0.346086	0.306546
GO:0042147	retrograde transport, endosome to Golgi	68	0.363029	1.34724	regression	0.0617361	0.346086	0.306546
GO:0097202	activation of cysteine-type endopeptidase activity	12	-0.589293	-1.48885	regression	0.0617551	0.346086	0.306546
GO:0061577	calcium ion transmembrane transport via high voltage-gated calcium channel	12	-0.589285	-1.48883	regression	0.0617593	0.346086	0.306546
GO:1904706	negative regulation of vascular smooth muscle cell proliferation	15	0.557457	1.47418	regression	0.0617629	0.346086	0.306546
GO:1902188	positive regulation of viral release from host cell	13	0.581378	1.48008	regression	0.0618483	0.346231	0.306675
GO:0009109	coenzyme catabolic process	12	0.595602	1.48385	regression	0.0619362	0.346391	0.306816
GO:0031016	pancreas development	67	0.36431	1.34838	regression	0.0620824	0.346875	0.307245
GO:0002544	chronic inflammatory response	17	-0.52816	-1.46663	regression	0.0624054	0.347955	0.308202
GO:0051457	maintenance of protein location in nucleus	21	0.503472	1.45067	regression	0.0624427	0.347955	0.308202
GO:0090394	negative regulation of excitatory postsynaptic potential	10	-0.622234	-1.49181	regression	0.062455	0.347955	0.308202
GO:0034440	lipid oxidation	87	0.341186	1.32161	regression	0.0626331	0.348614	0.308785
GO:0043525	positive regulation of neuron apoptotic process	45	-0.39348	-1.37972	regression	0.0628217	0.34933	0.309419
GO:1900274	regulation of phospholipase C activity	30	-0.443155	-1.41866	regression	0.0632755	0.351517	0.311357
GO:0007041	lysosomal transport	84	0.343704	1.32335	regression	0.063368	0.351695	0.311514
GO:0072077	renal vesicle morphogenesis	17	0.535415	1.46295	regression	0.0634961	0.352071	0.311847
GO:0045732	positive regulation of protein catabolic process	189	-0.276669	-1.23644	regression	0.0636486	0.352581	0.312299
GO:0010466	negative regulation of peptidase activity	203	0.284409	1.24419	regression	0.0637153	0.352614	0.312328
GO:0051048	negative regulation of secretion	173	-0.281736	-1.24451	regression	0.0637974	0.352734	0.312434
GO:0061458	reproductive system development	367	0.256858	1.19721	regression	0.0639508	0.35295	0.312626
GO:0090177	establishment of planar polarity involved in neural tube closure	13	0.579262	1.47469	regression	0.0640167	0.35295	0.312626
GO:0007179	transforming growth factor beta receptor signaling pathway	156	-0.287638	-1.25315	regression	0.0640184	0.35295	0.312626
GO:1902713	regulation of interferon-gamma secretion	10	-0.620458	-1.48756	regression	0.0641637	0.353234	0.312877
GO:0031440	regulation of mRNA 3'-end processing	21	0.501985	1.44639	regression	0.0641913	0.353234	0.312877
GO:0097756	negative regulation of blood vessel diameter	73	-0.344044	-1.3269	regression	0.0643055	0.353528	0.313138
GO:0006047	UDP-N-acetylglucosamine metabolic process	13	0.578505	1.47276	regression	0.0647787	0.355794	0.315145
GO:0045785	positive regulation of cell adhesion	319	-0.250723	-1.19068	regression	0.0652117	0.357835	0.316952
GO:0044344	cellular response to fibroblast growth factor stimulus	123	-0.302545	-1.27333	regression	0.0653015	0.35799	0.31709
GO:0001658	branching involved in ureteric bud morphogenesis	49	0.393082	1.3701	regression	0.0654574	0.358507	0.317548
GO:0008630	intrinsic apoptotic signaling pathway in response to DNA damage	98	0.330467	1.30526	regression	0.0655987	0.358869	0.317869
GO:0042359	vitamin D metabolic process	17	-0.525089	-1.4581	regression	0.0656468	0.358869	0.317869
GO:0035563	positive regulation of chromatin binding	11	0.607154	1.47783	regression	0.0658171	0.359463	0.318394
GO:0061844	antimicrobial humoral immune response mediated by antimicrobial peptide	40	-0.405116	-1.38458	regression	0.0659593	0.359902	0.318783
GO:0061448	connective tissue development	211	0.281518	1.23731	regression	0.0660749	0.360195	0.319043
GO:0009649	entrainment of circadian clock	23	-0.477929	-1.43456	regression	0.0661423	0.360225	0.319069
GO:0051546	keratinocyte migration	10	-0.618377	-1.48257	regression	0.0663007	0.3606	0.319402
GO:0010830	regulation of myotube differentiation	48	-0.384067	-1.36499	regression	0.0663837	0.3606	0.319402
GO:0060292	long term synaptic depression	26	-0.460028	-1.42286	regression	0.066397	0.3606	0.319402
GO:0006397	mRNA processing	438	0.2496	1.18215	regression	0.0665428	0.361055	0.319805
GO:0035637	multicellular organismal signaling	178	-0.279097	-1.23743	regression	0.0666362	0.361195	0.319929
GO:0061430	bone trabecula morphogenesis	12	0.590831	1.47196	regression	0.0666927	0.361195	0.319929
GO:0003229	ventricular cardiac muscle tissue development	53	0.383759	1.35887	regression	0.0668545	0.361735	0.320407
GO:0019471	4-hydroxyproline metabolic process	10	0.623056	1.47724	regression	0.0669763	0.362057	0.320693
GO:0051260	protein homooligomerization	285	0.266669	1.2123	regression	0.067147	0.362125	0.320752
GO:0003002	regionalization	279	0.267638	1.21397	regression	0.0671583	0.362125	0.320752
GO:0060008	Sertoli cell differentiation	18	0.523046	1.4501	regression	0.0671753	0.362125	0.320752
GO:0051782	negative regulation of cell division	13	0.575988	1.46635	regression	0.0673002	0.362267	0.320878
GO:0031290	retinal ganglion cell axon guidance	19	-0.506015	-1.44686	regression	0.0673261	0.362267	0.320878
GO:1901890	positive regulation of cell junction assembly	26	0.468506	1.42209	regression	0.067434	0.362283	0.320892
GO:0015909	long-chain fatty acid transport	53	-0.372955	-1.35237	regression	0.0674535	0.362283	0.320892
GO:0014808	release of sequestered calcium ion into cytosol by sarcoplasmic reticulum	28	0.458091	1.41486	regression	0.0676277	0.362884	0.321424
GO:0090398	cellular senescence	58	-0.363774	-1.34288	regression	0.0678214	0.363376	0.32186
GO:0010839	negative regulation of keratinocyte proliferation	13	0.575435	1.46495	regression	0.0678443	0.363376	0.32186
GO:0021955	central nervous system neuron axonogenesis	29	-0.444032	-1.41025	regression	0.0679685	0.363706	0.322153
GO:0033622	integrin activation	14	-0.555746	-1.46478	regression	0.0680831	0.363985	0.3224
GO:0001656	metanephros development	78	-0.336212	-1.31231	regression	0.0685201	0.365985	0.324172
GO:1904646	cellular response to amyloid-beta	24	-0.469462	-1.42409	regression	0.0686183	0.366174	0.324339
GO:0001906	cell killing	108	-0.310401	-1.28023	regression	0.0687625	0.366417	0.324554
GO:0019371	cyclooxygenase pathway	11	-0.597896	-1.47318	regression	0.0688571	0.366417	0.324554
GO:0043508	negative regulation of JUN kinase activity	14	0.562184	1.45987	regression	0.068895	0.366417	0.324554
GO:0009409	response to cold	43	0.405215	1.37522	regression	0.0689156	0.366417	0.324554
GO:0009101	glycoprotein biosynthetic process	294	-0.253152	-1.19178	regression	0.069119	0.367163	0.325215
GO:1901099	negative regulation of signal transduction in absence of ligand	30	-0.438468	-1.40365	regression	0.0692698	0.367294	0.325331
GO:2001240	negative regulation of extrinsic apoptotic signaling pathway in absence of ligand	30	-0.438468	-1.40365	regression	0.0692698	0.367294	0.325331
GO:0045109	intermediate filament organization	18	0.521141	1.44482	regression	0.0694586	0.36796	0.325921
GO:0007040	lysosome organization	47	0.394999	1.36539	regression	0.0696224	0.368158	0.326096
GO:0080171	lytic vacuole organization	47	0.394999	1.36539	regression	0.0696224	0.368158	0.326096
GO:0042249	establishment of planar polarity of embryonic epithelium	15	0.549723	1.45373	regression	0.0699463	0.369535	0.327316
GO:0003012	muscle system process	360	-0.244514	-1.17526	regression	0.0701673	0.370172	0.32788
GO:0061050	regulation of cell growth involved in cardiac muscle cell development	11	-0.596571	-1.46992	regression	0.0702428	0.370172	0.32788
GO:0014842	regulation of skeletal muscle satellite cell proliferation	12	0.587264	1.46307	regression	0.0702958	0.370172	0.32788
GO:0090050	positive regulation of cell migration involved in sprouting angiogenesis	21	-0.487866	-1.43136	regression	0.0704537	0.370172	0.32788
GO:0001510	RNA methylation	64	0.363638	1.3348	regression	0.0704691	0.370172	0.32788
GO:0043903	regulation of symbiosis, encompassing mutualism through parasitism	203	0.28208	1.23401	regression	0.0705355	0.370172	0.32788
GO:1903900	regulation of viral life cycle	124	0.311512	1.27567	regression	0.0705528	0.370172	0.32788
GO:0055008	cardiac muscle tissue morphogenesis	58	0.373016	1.34407	regression	0.0705755	0.370172	0.32788
GO:0044264	cellular polysaccharide metabolic process	79	-0.334099	-1.30702	regression	0.0706596	0.370279	0.327975
GO:0006275	regulation of DNA replication	109	-0.308845	-1.27577	regression	0.0708655	0.371024	0.328635
GO:0000226	microtubule cytoskeleton organization	454	0.247249	1.1746	regression	0.0713706	0.373333	0.33068
GO:0017001	antibiotic catabolic process	40	0.411479	1.37573	regression	0.0716411	0.374411	0.331635
GO:2000401	regulation of lymphocyte migration	40	-0.401132	-1.37096	regression	0.0719287	0.375305	0.332427
GO:0071300	cellular response to retinoic acid	58	-0.361493	-1.33446	regression	0.0720563	0.375305	0.332427
GO:0048268	clathrin coat assembly	18	0.518802	1.43833	regression	0.0720727	0.375305	0.332427
GO:0071417	cellular response to organonitrogen compound	479	-0.233684	-1.15254	regression	0.0720905	0.375305	0.332427
GO:0014857	regulation of skeletal muscle cell proliferation	13	0.571257	1.45431	regression	0.0722332	0.375305	0.332427
GO:0031929	TOR signaling	93	0.331514	1.29837	regression	0.0722789	0.375305	0.332427
GO:1903844	regulation of cellular response to transforming growth factor beta stimulus	99	-0.315281	-1.2819	regression	0.0722922	0.375305	0.332427
GO:0034368	protein-lipid complex remodeling	22	0.487788	1.42179	regression	0.0725283	0.375305	0.332427
GO:0034369	plasma lipoprotein particle remodeling	22	0.487788	1.42179	regression	0.0725283	0.375305	0.332427
GO:0050901	leukocyte tethering or rolling	18	-0.509864	-1.43717	regression	0.0726871	0.375305	0.332427
GO:0001941	postsynaptic membrane organization	33	-0.423587	-1.38624	regression	0.0727275	0.375305	0.332427
GO:0051493	regulation of cytoskeleton organization	437	0.248274	1.17566	regression	0.0727336	0.375305	0.332427
GO:0043271	negative regulation of ion transport	121	-0.300772	-1.26267	regression	0.0727495	0.375305	0.332427
GO:0051955	regulation of amino acid transport	29	-0.440401	-1.39872	regression	0.0727858	0.375305	0.332427
GO:1901021	positive regulation of calcium ion transmembrane transporter activity	30	0.445059	1.39633	regression	0.0728861	0.375305	0.332427
GO:0060457	negative regulation of digestive system process	13	-0.563631	-1.45628	regression	0.0728969	0.375305	0.332427
GO:0007389	pattern specification process	360	0.255427	1.1884	regression	0.0729079	0.375305	0.332427
GO:0021983	pituitary gland development	36	-0.412715	-1.37795	regression	0.0730256	0.375579	0.332669
GO:0061418	regulation of transcription from RNA polymerase II promoter in response to hypoxia	70	-0.343496	-1.31445	regression	0.0731612	0.375884	0.332939
GO:0071900	regulation of protein serine/threonine kinase activity	445	-0.235933	-1.15632	regression	0.0733817	0.375884	0.332939
GO:0060046	regulation of acrosome reaction	12	-0.577775	-1.45975	regression	0.073391	0.375884	0.332939
GO:0072595	maintenance of protein localization in organelle	38	0.416111	1.37624	regression	0.0733949	0.375884	0.332939
GO:0006376	mRNA splice site selection	28	0.453694	1.40127	regression	0.0734077	0.375884	0.332939
GO:0090502	RNA phosphodiester bond hydrolysis, endonucleolytic	58	0.371323	1.33797	regression	0.0735465	0.376075	0.333109
GO:0034367	protein-containing complex remodeling	23	0.480726	1.41684	regression	0.0735744	0.376075	0.333109
GO:0031099	regeneration	161	0.293813	1.24827	regression	0.0740754	0.377978	0.334795
GO:0010998	regulation of translational initiation by eIF2 alpha phosphorylation	10	0.615961	1.46042	regression	0.0740765	0.377978	0.334795
GO:0045684	positive regulation of epidermis development	29	0.448764	1.3971	regression	0.074151	0.378027	0.334838
GO:1905269	positive regulation of chromatin organization	86	0.336474	1.30075	regression	0.0743741	0.378833	0.335552
GO:0051445	regulation of meiotic cell cycle	31	-0.43054	-1.38866	regression	0.0745077	0.379044	0.335739
GO:0050670	regulation of lymphocyte proliferation	172	-0.278506	-1.22928	regression	0.0745458	0.379044	0.335739
GO:0002532	production of molecular mediator involved in inflammatory response	44	-0.388293	-1.35493	regression	0.0747114	0.379555	0.336191
GO:0048661	positive regulation of smooth muscle cell proliferation	69	-0.343939	-1.31268	regression	0.074805	0.379699	0.336319
GO:2001239	regulation of extrinsic apoptotic signaling pathway in absence of ligand	41	-0.396446	-1.3623	regression	0.0748706	0.379701	0.33632
GO:0000096	sulfur amino acid metabolic process	32	0.435577	1.38688	regression	0.0750864	0.380464	0.336996
GO:0044058	regulation of digestive system process	33	-0.421917	-1.38078	regression	0.0752374	0.380898	0.337381
GO:0043405	regulation of MAP kinase activity	306	-0.250029	-1.18204	regression	0.0754805	0.38155	0.337959
GO:1900182	positive regulation of protein localization to nucleus	60	-0.356424	-1.32475	regression	0.0754974	0.38155	0.337959
GO:2000780	negative regulation of double-strand break repair	22	-0.476399	-1.41438	regression	0.076175	0.384493	0.340565
GO:0032944	regulation of mononuclear cell proliferation	173	-0.277562	-1.22607	regression	0.0762539	0.384493	0.340565
GO:0043297	apical junction assembly	51	0.382265	1.34331	regression	0.0763006	0.384493	0.340565
GO:0001825	blastocyst formation	27	-0.447072	-1.39538	regression	0.0763472	0.384493	0.340565
GO:0032185	septin cytoskeleton organization	18	0.515259	1.42851	regression	0.0764098	0.384493	0.340565
GO:1901018	positive regulation of potassium ion transmembrane transporter activity	21	-0.482988	-1.41705	regression	0.0765317	0.384773	0.340813
GO:0051900	regulation of mitochondrial depolarization	17	0.523789	1.43118	regression	0.0766887	0.38523	0.341218
GO:0019369	arachidonic acid metabolic process	42	-0.392411	-1.35573	regression	0.0767634	0.385273	0.341256
GO:0044272	sulfur compound biosynthetic process	161	0.292807	1.24399	regression	0.07715	0.38666	0.342485
GO:0002089	lens morphogenesis in camera-type eye	18	0.514481	1.42635	regression	0.0773526	0.38666	0.342485
GO:0060074	synapse maturation	16	-0.524706	-1.43405	regression	0.0773954	0.38666	0.342485
GO:0070126	mitochondrial translational termination	82	-0.327845	-1.29113	regression	0.0774061	0.38666	0.342485
GO:1903306	negative regulation of regulated secretory pathway	20	-0.489608	-1.41861	regression	0.0774083	0.38666	0.342485
GO:0032604	granulocyte macrophage colony-stimulating factor production	11	-0.589841	-1.45334	regression	0.0774383	0.38666	0.342485
GO:0043647	inositol phosphate metabolic process	58	-0.35848	-1.32334	regression	0.0777974	0.387863	0.34355
GO:0072170	metanephric tubule development	22	-0.475129	-1.41061	regression	0.0778123	0.387863	0.34355
GO:0048169	regulation of long-term neuronal synaptic plasticity	25	-0.456545	-1.39879	regression	0.0779335	0.388134	0.34379
GO:0033692	cellular polysaccharide biosynthetic process	58	-0.358264	-1.32254	regression	0.0781794	0.389026	0.34458
GO:0060441	epithelial tube branching involved in lung morphogenesis	25	0.465446	1.3994	regression	0.0785748	0.389846	0.345306
GO:0000271	polysaccharide biosynthetic process	65	-0.347353	-1.31089	regression	0.0786465	0.389846	0.345306
GO:0042773	ATP synthesis coupled electron transport	73	-0.337031	-1.29986	regression	0.0786576	0.389846	0.345306
GO:0015908	fatty acid transport	75	-0.33455	-1.29653	regression	0.0786691	0.389846	0.345306
GO:0007176	regulation of epidermal growth factor-activated receptor activity	25	-0.455888	-1.39678	regression	0.0787739	0.389846	0.345306
GO:0009416	response to light stimulus	259	-0.256448	-1.19042	regression	0.0788021	0.389846	0.345306
GO:0055001	muscle cell development	140	-0.289244	-1.24073	regression	0.0788937	0.389846	0.345306
GO:1901984	negative regulation of protein acetylation	22	0.482852	1.40741	regression	0.0789057	0.389846	0.345306
GO:0090342	regulation of cell aging	42	-0.391081	-1.35113	regression	0.0790024	0.389846	0.345306
GO:0023019	signal transduction involved in regulation of gene expression	17	-0.513454	-1.4258	regression	0.0790327	0.389846	0.345306
GO:0008593	regulation of Notch signaling pathway	79	-0.330311	-1.2922	regression	0.0790807	0.389846	0.345306
GO:0050729	positive regulation of inflammatory response	87	-0.322307	-1.28237	regression	0.0791822	0.389964	0.345411
GO:0046834	lipid phosphorylation	98	-0.313257	-1.27179	regression	0.0792633	0.389964	0.345411
GO:0050927	positive regulation of positive chemotaxis	22	-0.473998	-1.40726	regression	0.0793443	0.389964	0.345411
GO:0090085	regulation of protein deubiquitination	11	0.594357	1.44668	regression	0.0793726	0.389964	0.345411
GO:0034349	glial cell apoptotic process	13	-0.55765	-1.44083	regression	0.0796258	0.390495	0.345881
GO:0002228	natural killer cell mediated immunity	50	-0.372096	-1.33359	regression	0.0796264	0.390495	0.345881
GO:0002438	acute inflammatory response to antigenic stimulus	18	-0.504018	-1.4207	regression	0.0796819	0.390495	0.345881
GO:0001756	somitogenesis	56	0.371384	1.32904	regression	0.0798041	0.390765	0.34612
GO:0043518	negative regulation of DNA damage response, signal transduction by p53 class mediator	12	0.57813	1.44032	regression	0.0801448	0.392103	0.347306
GO:0006775	fat-soluble vitamin metabolic process	36	-0.407991	-1.36218	regression	0.0804012	0.393027	0.348124
GO:0072210	metanephric nephron development	34	-0.414688	-1.36661	regression	0.080492	0.393141	0.348225
GO:0045185	maintenance of protein location	98	0.323956	1.27955	regression	0.0807001	0.393543	0.348581
GO:0030851	granulocyte differentiation	28	-0.4393	-1.38347	regression	0.0807095	0.393543	0.348581
GO:0000266	mitochondrial fission	33	0.427949	1.37214	regression	0.080802	0.393665	0.348689
GO:0010996	response to auditory stimulus	21	-0.479519	-1.40687	regression	0.0810749	0.394664	0.349574
GO:0051146	striated muscle cell differentiation	225	-0.262518	-1.19883	regression	0.0812365	0.39512	0.349978
GO:0071295	cellular response to vitamin	26	-0.448516	-1.38726	regression	0.081701	0.396987	0.351631
GO:0032276	regulation of gonadotropin secretion	10	-0.603444	-1.44677	regression	0.081768	0.396987	0.351631
GO:0043966	histone H3 acetylation	57	0.368824	1.32457	regression	0.0818248	0.396987	0.351631
GO:0071248	cellular response to metal ion	137	-0.289524	-1.23817	regression	0.0822113	0.39853	0.352998
GO:0045687	positive regulation of glial cell differentiation	35	0.419858	1.36428	regression	0.0824385	0.399299	0.353679
GO:0030217	T cell differentiation	188	-0.270923	-1.20991	regression	0.0832773	0.402899	0.356868
GO:0002710	negative regulation of T cell mediated immunity	14	-0.542233	-1.42916	regression	0.0833202	0.402899	0.356868
GO:2000757	negative regulation of peptidyl-lysine acetylation	21	0.486496	1.40176	regression	0.0833986	0.402943	0.356907
GO:0010927	cellular component assembly involved in morphogenesis	91	0.328028	1.28019	regression	0.0841848	0.405778	0.359419
GO:0003407	neural retina development	55	-0.360233	-1.31606	regression	0.0842433	0.405778	0.359419
GO:0006024	glycosaminoglycan biosynthetic process	94	-0.314462	-1.26771	regression	0.0842443	0.405778	0.359419
GO:0002064	epithelial cell development	176	0.285501	1.22717	regression	0.0842642	0.405778	0.359419
GO:0000413	protein peptidyl-prolyl isomerization	31	0.433406	1.36994	regression	0.0844665	0.406036	0.359647
GO:0099632	protein transport within plasma membrane	19	-0.492078	-1.40701	regression	0.084527	0.406036	0.359647
GO:0099637	neurotransmitter receptor transport	19	-0.492078	-1.40701	regression	0.084527	0.406036	0.359647
GO:0009583	detection of light stimulus	52	-0.365491	-1.32024	regression	0.0848349	0.406864	0.36038
GO:0038127	ERBB signaling pathway	137	0.299949	1.24632	regression	0.0848391	0.406864	0.36038
GO:0050866	negative regulation of cell activation	148	-0.283761	-1.22708	regression	0.0853129	0.4088	0.362095
GO:0015872	dopamine transport	34	-0.411553	-1.35628	regression	0.0855619	0.409382	0.36261
GO:0070997	neuron death	284	-0.250801	-1.1761	regression	0.085575	0.409382	0.36261
GO:0043266	regulation of potassium ion transport	81	-0.325388	-1.27866	regression	0.0856956	0.409501	0.362716
GO:0007045	cell-substrate adherens junction assembly	68	0.350907	1.30225	regression	0.0858647	0.409501	0.362716
GO:0048041	focal adhesion assembly	68	0.350907	1.30225	regression	0.0858647	0.409501	0.362716
GO:0070849	response to epidermal growth factor	42	0.397702	1.34307	regression	0.0858957	0.409501	0.362716
GO:0051384	response to glucocorticoid	127	-0.292936	-1.23889	regression	0.0859517	0.409501	0.362716
GO:0009261	ribonucleotide catabolic process	31	-0.422788	-1.36365	regression	0.0861992	0.410345	0.363463
GO:0097094	craniofacial suture morphogenesis	14	0.546819	1.41996	regression	0.0867476	0.412477	0.365352
GO:1903818	positive regulation of voltage-gated potassium channel activity	12	-0.565733	-1.42932	regression	0.0867889	0.412477	0.365352
GO:0001895	retina homeostasis	55	0.369453	1.31751	regression	0.0869881	0.413087	0.365892
GO:2001225	regulation of chloride transport	10	-0.598622	-1.43521	regression	0.0872169	0.413564	0.366314
GO:0046349	amino sugar biosynthetic process	12	0.572112	1.42533	regression	0.087264	0.413564	0.366314
GO:0016574	histone ubiquitination	39	0.404793	1.34623	regression	0.0873016	0.413564	0.366314
GO:0002076	osteoblast development	15	-0.526996	-1.41565	regression	0.0875338	0.414117	0.366805
GO:0045665	negative regulation of neuron differentiation	189	0.280784	1.21773	regression	0.087577	0.414117	0.366805
GO:1902275	regulation of chromatin organization	153	0.29238	1.23353	regression	0.0876319	0.414117	0.366805
GO:0006984	ER-nucleus signaling pathway	44	-0.381098	-1.32983	regression	0.0877152	0.414175	0.366856
GO:0031145	anaphase-promoting complex-dependent catabolic process	67	-0.340413	-1.29191	regression	0.0879053	0.414736	0.367353
GO:0045834	positive regulation of lipid metabolic process	110	-0.301725	-1.24815	regression	0.0881415	0.415514	0.368042
GO:0006144	purine nucleobase metabolic process	21	0.483042	1.39181	regression	0.0882137	0.415518	0.368046
GO:0010755	regulation of plasminogen activation	11	-0.580205	-1.4296	regression	0.0884347	0.415587	0.368107
GO:0031629	synaptic vesicle fusion to presynaptic active zone membrane	15	-0.526351	-1.41392	regression	0.0884425	0.415587	0.368107
GO:0099500	vesicle fusion to plasma membrane	15	-0.526351	-1.41392	regression	0.0884425	0.415587	0.368107
GO:0032309	icosanoid secretion	36	-0.403183	-1.34613	regression	0.0885866	0.415928	0.368409
GO:1902017	regulation of cilium assembly	37	0.40975	1.34719	regression	0.0888937	0.416716	0.369107
GO:0031365	N-terminal protein amino acid modification	23	0.469624	1.38412	regression	0.0889075	0.416716	0.369107
GO:0051967	negative regulation of synaptic transmission, glutamatergic	11	-0.579775	-1.42853	regression	0.0889691	0.416716	0.369107
GO:0043281	regulation of cysteine-type endopeptidase activity involved in apoptotic process	190	0.280051	1.21541	regression	0.0891463	0.416844	0.36922
GO:0036158	outer dynein arm assembly	17	-0.50563	-1.40407	regression	0.0891856	0.416844	0.36922
GO:0001824	blastocyst development	55	-0.357796	-1.30716	regression	0.0892917	0.416844	0.36922
GO:0050852	T cell receptor signaling pathway	167	-0.275791	-1.21258	regression	0.089346	0.416844	0.36922
GO:0021514	ventral spinal cord interneuron differentiation	16	0.523245	1.40713	regression	0.0893545	0.416844	0.36922
GO:0021904	dorsal/ventral neural tube patterning	22	0.475155	1.38497	regression	0.0900657	0.419384	0.37147
GO:0045651	positive regulation of macrophage differentiation	12	-0.56304	-1.42252	regression	0.0900705	0.419384	0.37147
GO:0017015	regulation of transforming growth factor beta receptor signaling pathway	97	-0.309936	-1.25603	regression	0.090115	0.419384	0.37147
GO:0032006	regulation of TOR signaling	79	0.336415	1.28204	regression	0.09025	0.419398	0.371482
GO:0070233	negative regulation of T cell apoptotic process	16	0.522555	1.40528	regression	0.0902621	0.419398	0.371482
GO:0034110	regulation of homotypic cell-cell adhesion	21	-0.472928	-1.38753	regression	0.0903445	0.419446	0.371525
GO:0072176	nephric duct development	12	0.56945	1.41869	regression	0.0905194	0.419923	0.371947
GO:0006029	proteoglycan metabolic process	78	-0.326483	-1.27434	regression	0.0905931	0.419931	0.371954
GO:0032780	negative regulation of ATPase activity	13	0.555335	1.41377	regression	0.090769	0.420411	0.37238
GO:0045986	negative regulation of smooth muscle contraction	11	-0.577796	-1.42366	regression	0.0912371	0.422244	0.374003
GO:0044088	regulation of vacuole organization	39	0.402563	1.33881	regression	0.0913929	0.422629	0.374344
GO:0050851	antigen receptor-mediated signaling pathway	201	-0.265404	-1.19536	regression	0.0916583	0.423519	0.375133
GO:0031334	positive regulation of protein complex assembly	223	-0.260239	-1.18718	regression	0.0919049	0.424322	0.375844
GO:0071385	cellular response to glucocorticoid stimulus	57	-0.353091	-1.29911	regression	0.0923286	0.425455	0.376847
GO:0006536	glutamate metabolic process	30	0.432623	1.35732	regression	0.0924642	0.425455	0.376847
GO:0007044	cell-substrate junction assembly	82	0.332664	1.27555	regression	0.0925363	0.425455	0.376847
GO:0072697	protein localization to cell cortex	10	0.599849	1.42222	regression	0.0925511	0.425455	0.376847
GO:0009749	response to glucose	172	-0.273228	-1.20598	regression	0.0925986	0.425455	0.376847
GO:1903531	negative regulation of secretion by cell	153	-0.279794	-1.21556	regression	0.0928102	0.425455	0.376847
GO:0002066	columnar/cuboidal epithelial cell development	53	0.370098	1.3105	regression	0.0928263	0.425455	0.376847
GO:0032096	negative regulation of response to food	11	0.582912	1.41882	regression	0.0928295	0.425455	0.376847
GO:0032099	negative regulation of appetite	11	0.582912	1.41882	regression	0.0928295	0.425455	0.376847
GO:0036475	neuron death in response to oxidative stress	19	-0.486053	-1.38978	regression	0.0930173	0.425455	0.376847
GO:1903203	regulation of oxidative stress-induced neuron death	19	-0.486053	-1.38978	regression	0.0930173	0.425455	0.376847
GO:0006349	regulation of gene expression by genetic imprinting	16	0.520451	1.39962	regression	0.0930271	0.425455	0.376847
GO:0006471	protein ADP-ribosylation	27	0.445336	1.36385	regression	0.0931299	0.425591	0.376967
GO:0045920	negative regulation of exocytosis	25	-0.446003	-1.36649	regression	0.0934551	0.426741	0.377987
GO:0042446	hormone biosynthetic process	72	-0.331701	-1.27608	regression	0.0937711	0.427849	0.378968
GO:0045661	regulation of myoblast differentiation	43	0.390778	1.32622	regression	0.0940202	0.42865	0.379677
GO:0060080	inhibitory postsynaptic potential	14	-0.533546	-1.40627	regression	0.0943739	0.429925	0.380807
GO:0098586	cellular response to virus	41	-0.385472	-1.32459	regression	0.0944758	0.429997	0.380871
GO:0002504	antigen processing and presentation of peptide or polysaccharide antigen via MHC class II	90	-0.313735	-1.25562	regression	0.0945508	0.429997	0.380871
GO:0007520	myoblast fusion	35	-0.402955	-1.33653	regression	0.094633	0.429997	0.380871
GO:0045931	positive regulation of mitotic cell cycle	124	-0.291677	-1.22915	regression	0.0948485	0.429997	0.380871
GO:0043268	positive regulation of potassium ion transport	38	-0.393674	-1.33041	regression	0.094857	0.429997	0.380871
GO:0061951	establishment of protein localization to plasma membrane	39	0.400677	1.33254	regression	0.0949044	0.429997	0.380871
GO:0003179	heart valve morphogenesis	32	0.423349	1.34795	regression	0.094934	0.429997	0.380871
GO:0045603	positive regulation of endothelial cell differentiation	16	0.519122	1.39604	regression	0.0949805	0.429997	0.380871
GO:0050994	regulation of lipid catabolic process	44	-0.377034	-1.31565	regression	0.0955581	0.432276	0.382889
GO:0050671	positive regulation of lymphocyte proliferation	109	-0.29984	-1.23858	regression	0.0956457	0.432337	0.382943
GO:0031032	actomyosin structure organization	164	0.286109	1.21849	regression	0.0958052	0.432722	0.383284
GO:0021799	cerebral cortex radially oriented cell migration	25	-0.444438	-1.3617	regression	0.0959083	0.432745	0.383305
GO:0006631	fatty acid metabolic process	307	0.256546	1.17513	regression	0.0960962	0.432745	0.383305
GO:0008380	RNA splicing	389	0.247619	1.16047	regression	0.0960981	0.432745	0.383305
GO:0005976	polysaccharide metabolic process	90	-0.313193	-1.25345	regression	0.0961078	0.432745	0.383305
GO:0003208	cardiac ventricle morphogenesis	69	0.345179	1.28433	regression	0.0964258	0.433842	0.384276
GO:0036066	protein O-linked fucosylation	16	-0.509504	-1.3925	regression	0.0968857	0.435574	0.38581
GO:0009584	detection of visible light	41	-0.384146	-1.32004	regression	0.0970537	0.435811	0.38602
GO:0003279	cardiac septum development	91	0.32319	1.2613	regression	0.0970882	0.435811	0.38602
GO:0070304	positive regulation of stress-activated protein kinase signaling cascade	125	-0.290451	-1.22536	regression	0.0973322	0.436253	0.386412
GO:0032729	positive regulation of interferon-gamma production	52	-0.359533	-1.29872	regression	0.0973364	0.436253	0.386412
GO:0009125	nucleoside monophosphate catabolic process	10	-0.590203	-1.41502	regression	0.0974816	0.436568	0.38669
GO:0006721	terpenoid metabolic process	86	-0.316104	-1.25514	regression	0.0976774	0.43682	0.386914
GO:0019395	fatty acid oxidation	86	0.327074	1.26441	regression	0.0977253	0.43682	0.386914
GO:0006970	response to osmotic stress	59	0.358028	1.29412	regression	0.0977884	0.43682	0.386914
GO:0038095	Fc-epsilon receptor signaling pathway	108	-0.299772	-1.23639	regression	0.0980336	0.43682	0.386914
GO:0032259	methylation	307	0.256149	1.17332	regression	0.0980399	0.43682	0.386914
GO:1900115	extracellular regulation of signal transduction	15	-0.518937	-1.394	regression	0.0981507	0.43682	0.386914
GO:1900116	extracellular negative regulation of signal transduction	15	-0.518937	-1.394	regression	0.0981507	0.43682	0.386914
GO:0014850	response to muscle activity	20	0.48341	1.37597	regression	0.0983001	0.43682	0.386914
GO:0071404	cellular response to low-density lipoprotein particle stimulus	16	0.516689	1.3895	regression	0.0983039	0.43682	0.386914
GO:0002042	cell migration involved in sprouting angiogenesis	49	-0.365038	-1.30281	regression	0.098311	0.43682	0.386914
GO:1903052	positive regulation of proteolysis involved in cellular protein catabolic process	110	-0.298403	-1.23441	regression	0.0984092	0.43682	0.386914
GO:0090190	positive regulation of branching involved in ureteric bud morphogenesis	16	0.51659	1.38924	regression	0.0984383	0.43682	0.386914
GO:0032946	positive regulation of mononuclear cell proliferation	110	-0.298342	-1.23415	regression	0.0986035	0.43722	0.387268
GO:0042559	pteridine-containing compound biosynthetic process	14	0.537574	1.39596	regression	0.098745	0.437514	0.387529
GO:1905146	lysosomal protein catabolic process	10	0.594806	1.41026	regression	0.0989293	0.437997	0.387957
GO:1901652	response to peptide	440	-0.231835	-1.13506	regression	0.0990954	0.438209	0.388144
GO:1901028	regulation of mitochondrial outer membrane permeabilization involved in apoptotic signaling pathway	43	-0.377943	-1.31221	regression	0.0991276	0.438209	0.388144
GO:0031018	endocrine pancreas development	39	0.398274	1.32455	regression	0.099383	0.438814	0.38868
GO:0015931	nucleobase-containing compound transport	212	0.272047	1.19647	regression	0.0994419	0.438814	0.38868
GO:0048665	neuron fate specification	27	0.441482	1.35205	regression	0.0994906	0.438814	0.38868
GO:0016197	endosomal transport	172	0.282457	1.21041	regression	0.0998034	0.439818	0.38957
GO:0060249	anatomical structure homeostasis	337	0.252193	1.16595	regression	0.0998695	0.439818	0.38957
GO:0048714	positive regulation of oligodendrocyte differentiation	17	0.506061	1.38275	regression	0.100128	0.440119	0.389836
GO:0001773	myeloid dendritic cell activation	25	-0.441791	-1.35359	regression	0.100137	0.440119	0.389836
GO:1903209	positive regulation of oxidative stress-induced cell death	14	-0.529099	-1.39455	regression	0.100272	0.440119	0.389836
GO:1902186	regulation of viral release from host cell	28	0.43649	1.34814	regression	0.100287	0.440119	0.389836
GO:0038092	nodal signaling pathway	12	-0.554923	-1.40201	regression	0.100386	0.440119	0.389836
GO:0019373	epoxygenase P450 pathway	15	-0.517363	-1.38978	regression	0.100391	0.440119	0.389836
GO:0032651	regulation of interleukin-1 beta production	50	-0.361973	-1.29731	regression	0.100569	0.440255	0.389956
GO:0046425	regulation of JAK-STAT cascade	123	-0.290493	-1.2226	regression	0.100754	0.440255	0.389956
GO:2000772	regulation of cellular senescence	36	-0.396529	-1.32391	regression	0.100769	0.440255	0.389956
GO:0036499	PERK-mediated unfolded protein response	21	-0.465835	-1.36672	regression	0.100856	0.440255	0.389956
GO:0007029	endoplasmic reticulum organization	43	0.387363	1.31463	regression	0.100857	0.440255	0.389956
GO:1904754	positive regulation of vascular associated smooth muscle cell migration	13	0.54782	1.39464	regression	0.100876	0.440255	0.389956
GO:0010883	regulation of lipid storage	36	0.406482	1.32876	regression	0.100952	0.440257	0.389958
GO:0043010	camera-type eye development	266	-0.250452	-1.16593	regression	0.101112	0.440397	0.390082
GO:0006575	cellular modified amino acid metabolic process	155	0.287782	1.21627	regression	0.101164	0.440397	0.390082
GO:0006893	Golgi to plasma membrane transport	43	0.387185	1.31403	regression	0.101211	0.440397	0.390082
GO:0002088	lens development in camera-type eye	60	0.354949	1.28715	regression	0.101449	0.440648	0.390304
GO:0099515	actin filament-based transport	11	0.576087	1.40221	regression	0.10147	0.440648	0.390304
GO:2000136	regulation of cell proliferation involved in heart morphogenesis	15	0.524536	1.38712	regression	0.101496	0.440648	0.390304
GO:0002250	adaptive immune response	289	-0.246869	-1.15993	regression	0.101607	0.4408	0.390439
GO:0051150	regulation of smooth muscle cell differentiation	27	0.439951	1.34736	regression	0.101999	0.442113	0.391602
GO:1903514	release of sequestered calcium ion into cytosol by endoplasmic reticulum	29	0.431234	1.34253	regression	0.102067	0.442113	0.391602
GO:0098534	centriole assembly	27	0.439823	1.34697	regression	0.102203	0.442113	0.391602
GO:0010712	regulation of collagen metabolic process	32	0.419262	1.33494	regression	0.102362	0.442113	0.391602
GO:0045779	negative regulation of bone resorption	11	0.575299	1.40029	regression	0.102485	0.442113	0.391602
GO:0019915	lipid storage	53	0.365725	1.29501	regression	0.102547	0.442113	0.391602
GO:0034314	Arp2/3 complex-mediated actin nucleation	31	-0.413256	-1.33291	regression	0.102558	0.442113	0.391602
GO:0002793	positive regulation of peptide secretion	221	-0.258208	-1.17662	regression	0.102608	0.442113	0.391602
GO:0001503	ossification	324	0.253165	1.16593	regression	0.102614	0.442113	0.391602
GO:0042775	mitochondrial ATP synthesis coupled electron transport	72	-0.328253	-1.26281	regression	0.102669	0.442113	0.391602
GO:0034612	response to tumor necrosis factor	252	-0.252238	-1.16741	regression	0.103257	0.444102	0.393364
GO:0009081	branched-chain amino acid metabolic process	23	0.460464	1.35713	regression	0.103283	0.444102	0.393364
GO:0040020	regulation of meiotic nuclear division	19	-0.478785	-1.369	regression	0.103474	0.444593	0.393799
GO:0006732	coenzyme metabolic process	330	0.252252	1.16379	regression	0.10377	0.445305	0.394429
GO:0003128	heart field specification	11	0.574233	1.3977	regression	0.103792	0.445305	0.394429
GO:0043576	regulation of respiratory gaseous exchange	20	-0.470998	-1.36469	regression	0.103962	0.445705	0.394784
GO:0071871	response to epinephrine	16	-0.504508	-1.37885	regression	0.104118	0.445746	0.39482
GO:0032095	regulation of response to food	14	0.533728	1.38597	regression	0.104125	0.445746	0.39482
GO:0071384	cellular response to corticosteroid stimulus	61	-0.341788	-1.27439	regression	0.104308	0.445912	0.394967
GO:0048741	skeletal muscle fiber development	29	-0.420451	-1.33536	regression	0.104333	0.445912	0.394967
GO:0051298	centrosome duplication	57	0.358416	1.28719	regression	0.104393	0.445912	0.394967
GO:0061041	regulation of wound healing	104	-0.300322	-1.23094	regression	0.104498	0.446032	0.395073
GO:0061053	somite development	73	0.337292	1.26747	regression	0.10478	0.446574	0.395554
GO:0060675	ureteric bud morphogenesis	51	0.368483	1.29488	regression	0.104834	0.446574	0.395554
GO:0071435	potassium ion export	14	-0.525696	-1.38558	regression	0.104855	0.446574	0.395554
GO:0006914	autophagy	425	0.243121	1.14853	regression	0.105028	0.446658	0.395628
GO:0061919	process utilizing autophagic mechanism	425	0.243121	1.14853	regression	0.105028	0.446658	0.395628
GO:0046460	neutral lipid biosynthetic process	33	0.413803	1.32678	regression	0.105341	0.447336	0.396228
GO:0046463	acylglycerol biosynthetic process	33	0.413803	1.32678	regression	0.105341	0.447336	0.396228
GO:0046479	glycosphingolipid catabolic process	10	-0.583671	-1.39936	regression	0.105547	0.447676	0.396529
GO:1905952	regulation of lipid localization	111	-0.295681	-1.22492	regression	0.105575	0.447676	0.396529
GO:0050854	regulation of antigen receptor-mediated signaling pathway	46	-0.367989	-1.29601	regression	0.10573	0.447965	0.396785
GO:0090049	regulation of cell migration involved in sprouting angiogenesis	39	-0.385214	-1.30917	regression	0.105841	0.447965	0.396785
GO:0043116	negative regulation of vascular permeability	10	-0.583424	-1.39877	regression	0.105874	0.447965	0.396785
GO:0060384	innervation	21	-0.462518	-1.35699	regression	0.106031	0.448303	0.397084
GO:0006066	alcohol metabolic process	274	0.259178	1.17326	regression	0.106187	0.448638	0.397381
GO:0008206	bile acid metabolic process	34	0.409892	1.323	regression	0.106314	0.448846	0.397566
GO:0018243	protein O-linked glycosylation via threonine	14	0.531342	1.37978	regression	0.107434	0.45318	0.401405
GO:0006991	response to sterol depletion	10	-0.582179	-1.39578	regression	0.107496	0.45318	0.401405
GO:0038179	neurotrophin signaling pathway	36	-0.392854	-1.31164	regression	0.107843	0.453456	0.401649
GO:0015893	drug transport	174	-0.268928	-1.18889	regression	0.107892	0.453456	0.401649
GO:0031106	septin ring organization	17	0.500807	1.36839	regression	0.107944	0.453456	0.401649
GO:0045913	positive regulation of carbohydrate metabolic process	61	-0.340375	-1.26913	regression	0.107953	0.453456	0.401649
GO:0014048	regulation of glutamate secretion	14	-0.523593	-1.38003	regression	0.108025	0.453456	0.401649
GO:0045880	positive regulation of smoothened signaling pathway	27	0.436551	1.33695	regression	0.108029	0.453456	0.401649
GO:1900409	positive regulation of cellular response to oxidative stress	15	-0.512034	-1.37546	regression	0.108109	0.453466	0.401658
GO:1901570	fatty acid derivative biosynthetic process	75	-0.322936	-1.25152	regression	0.108362	0.45391	0.402052
GO:0072606	interleukin-8 secretion	27	0.436343	1.33631	regression	0.108371	0.45391	0.402052
GO:0018107	peptidyl-threonine phosphorylation	111	-0.294829	-1.22139	regression	0.108497	0.454111	0.402229
GO:0072273	metanephric nephron morphogenesis	22	0.463449	1.35085	regression	0.108671	0.454512	0.402584
GO:0019377	glycolipid catabolic process	11	-0.563954	-1.38955	regression	0.109002	0.455498	0.403458
GO:0032436	positive regulation of proteasomal ubiquitin-dependent protein catabolic process	76	-0.321588	-1.24933	regression	0.109063	0.455498	0.403458
GO:0000186	activation of MAPKK activity	50	0.368407	1.28938	regression	0.109217	0.455814	0.403738
GO:0097531	mast cell migration	11	0.570082	1.38759	regression	0.109506	0.456692	0.404515
GO:0051382	kinetochore assembly	14	-0.522555	-1.3773	regression	0.109594	0.456735	0.404553
GO:0018242	protein O-linked glycosylation via serine	15	0.518819	1.372	regression	0.109802	0.45692	0.404717
GO:0032509	endosome transport via multivesicular body sorting pathway	15	0.518777	1.37189	regression	0.109868	0.45692	0.404717
GO:0043506	regulation of JUN kinase activity	76	0.332211	1.2575	regression	0.109938	0.45692	0.404717
GO:0071827	plasma lipoprotein particle organization	36	0.40193	1.31388	regression	0.109953	0.45692	0.404717
GO:0010092	specification of animal organ identity	28	0.431054	1.33135	regression	0.110281	0.457956	0.405635
GO:0071044	histone mRNA catabolic process	11	0.569333	1.38577	regression	0.110521	0.458626	0.406228
GO:0035904	aorta development	49	0.369741	1.28874	regression	0.110738	0.459033	0.406589
GO:1903901	negative regulation of viral life cycle	69	0.339583	1.26351	regression	0.110831	0.459033	0.406589
GO:0032594	protein transport within lipid bilayer	26	-0.430457	-1.3314	regression	0.111056	0.459033	0.406589
GO:0050926	regulation of positive chemotaxis	23	-0.446597	-1.34051	regression	0.111163	0.459033	0.406589
GO:0010719	negative regulation of epithelial to mesenchymal transition	25	0.444861	1.33751	regression	0.111252	0.459033	0.406589
GO:0072012	glomerulus vasculature development	21	-0.459308	-1.34757	regression	0.111269	0.459033	0.406589
GO:0045685	regulation of glial cell differentiation	61	0.349582	1.27171	regression	0.11141	0.459033	0.406589
GO:0021513	spinal cord dorsal/ventral patterning	22	0.461784	1.346	regression	0.111518	0.459033	0.406589
GO:0015949	nucleobase-containing small molecule interconversion	28	0.430255	1.32888	regression	0.111722	0.459033	0.406589
GO:0019076	viral release from host cell	32	0.41432	1.3192	regression	0.111723	0.459033	0.406589
GO:0035890	exit from host	32	0.41432	1.3192	regression	0.111723	0.459033	0.406589
GO:0035891	exit from host cell	32	0.41432	1.3192	regression	0.111723	0.459033	0.406589
GO:0052126	movement in host environment	32	0.41432	1.3192	regression	0.111723	0.459033	0.406589
GO:0052192	movement in environment of other organism involved in symbiotic interaction	32	0.41432	1.3192	regression	0.111723	0.459033	0.406589
GO:0010642	negative regulation of platelet-derived growth factor receptor signaling pathway	17	-0.490064	-1.36085	regression	0.111848	0.459222	0.406757
GO:0006568	tryptophan metabolic process	10	0.584802	1.38654	regression	0.112038	0.45968	0.407162
GO:0022029	telencephalon cell migration	50	-0.356977	-1.2794	regression	0.112222	0.46011	0.407543
GO:0090025	regulation of monocyte chemotaxis	17	-0.489625	-1.35963	regression	0.112547	0.46032	0.407729
GO:0002691	regulation of cellular extravasation	19	-0.472982	-1.35241	regression	0.112629	0.46032	0.407729
GO:0070169	positive regulation of biomineral tissue development	31	-0.407985	-1.31591	regression	0.112693	0.46032	0.407729
GO:0007043	cell-cell junction assembly	103	0.30936	1.23168	regression	0.112761	0.46032	0.407729
GO:0051346	negative regulation of hydrolase activity	373	0.246204	1.14931	regression	0.112805	0.46032	0.407729
GO:1903793	positive regulation of anion transport	40	-0.379175	-1.29592	regression	0.11282	0.46032	0.407729
GO:0051961	negative regulation of nervous system development	259	0.260163	1.1706	regression	0.112827	0.46032	0.407729
GO:1901201	regulation of extracellular matrix assembly	14	0.527513	1.36983	regression	0.113168	0.461204	0.408512
GO:0034123	positive regulation of toll-like receptor signaling pathway	16	0.506585	1.36233	regression	0.113202	0.461204	0.408512
GO:0051642	centrosome localization	21	0.467089	1.34584	regression	0.113324	0.461378	0.408666
GO:0050686	negative regulation of mRNA processing	27	0.433519	1.32766	regression	0.113556	0.461698	0.40895
GO:0006112	energy reserve metabolic process	71	-0.32549	-1.2489	regression	0.11368	0.461698	0.40895
GO:0031953	negative regulation of protein autophosphorylation	10	0.583654	1.38382	regression	0.113689	0.461698	0.40895
GO:0022038	corpus callosum development	15	-0.508266	-1.36534	regression	0.11372	0.461698	0.40895
GO:0019722	calcium-mediated signaling	147	-0.276669	-1.1952	regression	0.113906	0.462133	0.409335
GO:0003007	heart morphogenesis	213	0.268506	1.1816	regression	0.114082	0.46236	0.409536
GO:0072148	epithelial cell fate commitment	16	0.506001	1.36076	regression	0.114121	0.46236	0.409536
GO:0021885	forebrain cell migration	53	-0.350656	-1.27151	regression	0.114245	0.46254	0.409695
GO:0060768	regulation of epithelial cell proliferation involved in prostate gland development	10	0.58308	1.38246	regression	0.11445	0.462885	0.410001
GO:2000095	regulation of Wnt signaling pathway, planar cell polarity pathway	12	0.551716	1.37451	regression	0.114489	0.462885	0.410001
GO:0035306	positive regulation of dephosphorylation	45	-0.366154	-1.2839	regression	0.114583	0.462945	0.410054
GO:0090314	positive regulation of protein targeting to membrane	24	-0.438855	-1.33125	regression	0.114745	0.463278	0.410349
GO:0032611	interleukin-1 beta production	59	-0.340686	-1.26207	regression	0.115013	0.463843	0.41085
GO:0003170	heart valve development	36	0.399452	1.30578	regression	0.115045	0.463843	0.41085
GO:0070830	bicellular tight junction assembly	43	0.380506	1.29136	regression	0.11557	0.465641	0.412442
GO:1901214	regulation of neuron death	254	-0.249521	-1.15591	regression	0.116029	0.467146	0.413775
GO:0010880	regulation of release of sequestered calcium ion into cytosol by sarcoplasmic reticulum	24	0.447221	1.3317	regression	0.116105	0.467146	0.413775
GO:0038083	peptidyl-tyrosine autophosphorylation	48	0.36948	1.28243	regression	0.116241	0.467147	0.413776
GO:0099072	regulation of postsynaptic membrane neurotransmitter receptor levels	21	-0.456402	-1.33904	regression	0.116313	0.467147	0.413776
GO:0035270	endocrine system development	108	-0.294315	-1.21389	regression	0.116504	0.467147	0.413776
GO:0051882	mitochondrial depolarization	20	0.471891	1.34319	regression	0.116543	0.467147	0.413776
GO:0051349	positive regulation of lyase activity	16	-0.496276	-1.35635	regression	0.116614	0.467147	0.413776
GO:0045907	positive regulation of vasoconstriction	30	-0.409824	-1.31195	regression	0.116664	0.467147	0.413776
GO:0071361	cellular response to ethanol	10	-0.575403	-1.37954	regression	0.116666	0.467147	0.413776
GO:0070106	interleukin-27-mediated signaling pathway	11	0.56479	1.37471	regression	0.11688	0.467369	0.413973
GO:0048863	stem cell differentiation	234	-0.252839	-1.16021	regression	0.116916	0.467369	0.413973
GO:0090305	nucleic acid phosphodiester bond hydrolysis	239	0.262742	1.17164	regression	0.116963	0.467369	0.413973
GO:0001956	positive regulation of neurotransmitter secretion	13	-0.52912	-1.36711	regression	0.117178	0.467907	0.414449
GO:0043648	dicarboxylic acid metabolic process	96	0.312743	1.23123	regression	0.117415	0.468535	0.415005
GO:0051186	cofactor metabolic process	489	0.236787	1.13183	regression	0.117564	0.468592	0.415056
GO:0003188	heart valve formation	13	0.536065	1.36472	regression	0.117591	0.468592	0.415056
GO:0070234	positive regulation of T cell apoptotic process	12	-0.542429	-1.37045	regression	0.117892	0.469473	0.415836
GO:0031960	response to corticosteroid	142	-0.277456	-1.19264	regression	0.118033	0.469713	0.416049
GO:0021516	dorsal spinal cord development	19	0.478212	1.34382	regression	0.118121	0.46974	0.416072
GO:0045214	sarcomere organization	40	0.386731	1.29298	regression	0.118216	0.469799	0.416125
GO:0030816	positive regulation of cAMP metabolic process	30	-0.408703	-1.30836	regression	0.118902	0.472202	0.418254
GO:0042476	odontogenesis	102	0.308155	1.22497	regression	0.119046	0.472452	0.418474
GO:0007530	sex determination	20	-0.461436	-1.33699	regression	0.119632	0.474454	0.420248
GO:0040019	positive regulation of embryonic development	29	-0.412086	-1.30879	regression	0.119801	0.474509	0.420297
GO:0009072	aromatic amino acid family metabolic process	25	0.439956	1.32277	regression	0.120092	0.474509	0.420297
GO:0095500	acetylcholine receptor signaling pathway	20	-0.461109	-1.33604	regression	0.120204	0.474509	0.420297
GO:1903831	signal transduction involved in cellular response to ammonium ion	20	-0.461109	-1.33604	regression	0.120204	0.474509	0.420297
GO:1905144	response to acetylcholine	20	-0.461109	-1.33604	regression	0.120204	0.474509	0.420297
GO:1905145	cellular response to acetylcholine	20	-0.461109	-1.33604	regression	0.120204	0.474509	0.420297
GO:0010042	response to manganese ion	14	-0.515384	-1.3584	regression	0.120255	0.474509	0.420297
GO:0019228	neuronal action potential	28	-0.416212	-1.31076	regression	0.120353	0.474509	0.420297
GO:0072234	metanephric nephron tubule development	19	-0.46824	-1.33885	regression	0.120406	0.474509	0.420297
GO:1900024	regulation of substrate adhesion-dependent cell spreading	40	0.385729	1.28964	regression	0.120503	0.474509	0.420297
GO:0030101	natural killer cell activation	54	-0.346503	-1.26134	regression	0.120545	0.474509	0.420297
GO:0009798	axis specification	70	0.334813	1.24905	regression	0.120774	0.474509	0.420297
GO:0016264	gap junction assembly	11	0.56207	1.36809	regression	0.120786	0.474509	0.420297
GO:1901342	regulation of vasculature development	274	0.256329	1.16036	regression	0.120936	0.474509	0.420297
GO:0051383	kinetochore organization	18	-0.475894	-1.34142	regression	0.120984	0.474509	0.420297
GO:0000469	cleavage involved in rRNA processing	23	0.450236	1.32698	regression	0.121029	0.474509	0.420297
GO:0032878	regulation of establishment or maintenance of cell polarity	22	0.456397	1.3303	regression	0.121031	0.474509	0.420297
GO:0072578	neurotransmitter-gated ion channel clustering	10	-0.572019	-1.37143	regression	0.121385	0.475574	0.42124
GO:0016114	terpenoid biosynthetic process	14	-0.514544	-1.35618	regression	0.121541	0.475865	0.421498
GO:0007602	phototransduction	41	-0.372733	-1.28082	regression	0.121711	0.475936	0.421561
GO:0001666	response to hypoxia	305	-0.241352	-1.14064	regression	0.121722	0.475936	0.421561
GO:0006855	drug transmembrane transport	74	0.330171	1.24394	regression	0.121827	0.476026	0.421641
GO:0006026	aminoglycan catabolic process	59	0.348457	1.25953	regression	0.122152	0.476973	0.422479
GO:0090066	regulation of anatomical structure size	432	-0.229179	-1.12032	regression	0.122585	0.478346	0.423696
GO:0071825	protein-lipid complex subunit organization	38	0.39003	1.28998	regression	0.122894	0.479229	0.424477
GO:0060976	coronary vasculature development	39	0.387249	1.28788	regression	0.123146	0.479392	0.424622
GO:0051148	negative regulation of muscle cell differentiation	39	0.387236	1.28784	regression	0.123161	0.479392	0.424622
GO:0045646	regulation of erythrocyte differentiation	43	-0.367322	-1.27533	regression	0.123183	0.479392	0.424622
GO:0006338	chromatin remodeling	160	0.280537	1.19084	regression	0.123325	0.479426	0.424652
GO:0090596	sensory organ morphogenesis	225	-0.253373	-1.15706	regression	0.123356	0.479426	0.424652
GO:0030949	positive regulation of vascular endothelial growth factor receptor signaling pathway	15	-0.501847	-1.3481	regression	0.123572	0.479942	0.425109
GO:0050775	positive regulation of dendrite morphogenesis	28	-0.414468	-1.30526	regression	0.123919	0.480467	0.425574
GO:0032196	transposition	19	0.474823	1.3343	regression	0.123926	0.480467	0.425574
GO:0019934	cGMP-mediated signaling	11	-0.553225	-1.36312	regression	0.124004	0.480467	0.425574
GO:0043618	regulation of transcription from RNA polymerase II promoter in response to stress	104	-0.294781	-1.20823	regression	0.124037	0.480467	0.425574
GO:0007178	transmembrane receptor protein serine/threonine kinase signaling pathway	273	-0.245145	-1.14464	regression	0.124222	0.480696	0.425777
GO:2000249	regulation of actin cytoskeleton reorganization	33	-0.39502	-1.29275	regression	0.124261	0.480696	0.425777
GO:0030252	growth hormone secretion	16	-0.491428	-1.3431	regression	0.124376	0.480823	0.425889
GO:0002576	platelet degranulation	107	0.303488	1.21544	regression	0.124583	0.480952	0.426004
GO:0070293	renal absorption	16	0.499491	1.34325	regression	0.124648	0.480952	0.426004
GO:2001234	negative regulation of apoptotic signaling pathway	189	-0.261083	-1.16679	regression	0.12474	0.480952	0.426004
GO:1903825	organic acid transmembrane transport	97	0.309858	1.22199	regression	0.124848	0.480952	0.426004
GO:1905039	carboxylic acid transmembrane transport	97	0.309858	1.22199	regression	0.124848	0.480952	0.426004
GO:0009635	response to herbicide	11	-0.552609	-1.3616	regression	0.124905	0.480952	0.426004
GO:0014831	gastro-intestinal system smooth muscle contraction	11	-0.552407	-1.3611	regression	0.125193	0.481011	0.426056
GO:0034356	NAD biosynthesis via nicotinamide riboside salvage pathway	11	-0.55237	-1.36101	regression	0.125258	0.481011	0.426056
GO:0042447	hormone catabolic process	12	0.544456	1.35643	regression	0.125271	0.481011	0.426056
GO:0071320	cellular response to cAMP	47	-0.357696	-1.26539	regression	0.125284	0.481011	0.426056
GO:0035296	regulation of tube diameter	113	-0.289032	-1.20081	regression	0.125416	0.481011	0.426056
GO:0097746	regulation of blood vessel diameter	113	-0.289032	-1.20081	regression	0.125416	0.481011	0.426056
GO:0016050	vesicle organization	345	0.246913	1.14415	regression	0.125519	0.481086	0.426122
GO:0051897	positive regulation of protein kinase B signaling	123	-0.283759	-1.19426	regression	0.12575	0.481656	0.426627
GO:0060438	trachea development	19	0.473681	1.33109	regression	0.125991	0.482263	0.427165
GO:0030501	positive regulation of bone mineralization	28	-0.413349	-1.30174	regression	0.126276	0.482865	0.427698
GO:0045738	negative regulation of DNA repair	24	-0.432746	-1.31272	regression	0.126315	0.482865	0.427698
GO:0000083	regulation of transcription involved in G1/S transition of mitotic cell cycle	26	-0.422556	-1.30696	regression	0.126424	0.482965	0.427786
GO:2000756	regulation of peptidyl-lysine acetylation	56	0.351406	1.25755	regression	0.12657	0.48317	0.427968
GO:0071732	cellular response to nitric oxide	14	0.51874	1.34705	regression	0.126643	0.48317	0.427968
GO:1901983	regulation of protein acetylation	64	0.339915	1.24772	regression	0.127211	0.484791	0.429404
GO:0048713	regulation of oligodendrocyte differentiation	34	0.399945	1.29089	regression	0.127235	0.484791	0.429404
GO:0043401	steroid hormone mediated signaling pathway	172	0.275892	1.18228	regression	0.127384	0.485043	0.429627
GO:0045649	regulation of macrophage differentiation	19	-0.463977	-1.32666	regression	0.127742	0.485894	0.430381
GO:0031058	positive regulation of histone modification	79	0.323403	1.23245	regression	0.127774	0.485894	0.430381
GO:0071675	regulation of mononuclear cell migration	29	-0.407842	-1.29531	regression	0.128583	0.48793	0.432185
GO:0033262	regulation of nuclear cell cycle DNA replication	12	-0.535147	-1.35205	regression	0.128674	0.48793	0.432185
GO:1905564	positive regulation of vascular endothelial cell proliferation	13	0.528721	1.34602	regression	0.128768	0.48793	0.432185
GO:0031116	positive regulation of microtubule polymerization	26	0.430422	1.30649	regression	0.128773	0.48793	0.432185
GO:0070873	regulation of glycogen metabolic process	25	-0.426236	-1.30593	regression	0.128841	0.48793	0.432185
GO:0051284	positive regulation of sequestering of calcium ion	13	0.528626	1.34578	regression	0.128919	0.48793	0.432185
GO:0042306	regulation of protein import into nucleus	48	-0.354295	-1.25918	regression	0.128943	0.48793	0.432185
GO:0014819	regulation of skeletal muscle contraction	12	0.54201	1.35033	regression	0.128981	0.48793	0.432185
GO:0033197	response to vitamin E	10	-0.566202	-1.35748	regression	0.129823	0.490799	0.434725
GO:0033137	negative regulation of peptidyl-serine phosphorylation	23	0.445467	1.31292	regression	0.130151	0.491644	0.435475
GO:0039694	viral RNA genome replication	22	-0.442479	-1.31368	regression	0.130226	0.491644	0.435475
GO:0055070	copper ion homeostasis	15	0.505975	1.33804	regression	0.1303	0.491644	0.435475
GO:0035690	cellular response to drug	297	-0.240905	-1.13532	regression	0.130491	0.492045	0.435829
GO:0072160	nephron tubule epithelial cell differentiation	13	-0.520532	-1.34492	regression	0.130739	0.492453	0.436191
GO:0046599	regulation of centriole replication	14	0.516254	1.3406	regression	0.130768	0.492453	0.436191
GO:0048670	regulation of collateral sprouting	19	0.470631	1.32252	regression	0.131478	0.494248	0.43778
GO:0061213	positive regulation of mesonephros development	17	0.48649	1.32927	regression	0.131593	0.494248	0.43778
GO:0098900	regulation of action potential	46	-0.357311	-1.25841	regression	0.131684	0.494248	0.43778
GO:0048278	vesicle docking	63	-0.329311	-1.23542	regression	0.131783	0.494248	0.43778
GO:0006720	isoprenoid metabolic process	103	-0.293285	-1.20022	regression	0.131838	0.494248	0.43778
GO:0000377	RNA splicing, via transesterification reactions with bulged adenosine as nucleophile	299	0.251092	1.14701	regression	0.131851	0.494248	0.43778
GO:0000398	mRNA splicing, via spliceosome	299	0.251092	1.14701	regression	0.131851	0.494248	0.43778
GO:2000810	regulation of bicellular tight junction assembly	16	0.495149	1.33157	regression	0.131924	0.494248	0.43778
GO:0001909	leukocyte mediated cytotoxicity	74	-0.316427	-1.22325	regression	0.132093	0.494562	0.438059
GO:0006577	amino-acid betaine metabolic process	16	0.494873	1.33083	regression	0.132377	0.495242	0.438661
GO:0060412	ventricular septum morphogenesis	37	0.388653	1.27782	regression	0.132444	0.495242	0.438661
GO:0090503	RNA phosphodiester bond hydrolysis, exonucleolytic	35	0.394297	1.28122	regression	0.132675	0.495787	0.439143
GO:0044849	estrous cycle	12	-0.532433	-1.34519	regression	0.132785	0.495878	0.439225
GO:0033559	unsaturated fatty acid metabolic process	83	-0.307629	-1.21401	regression	0.133032	0.4959	0.439244
GO:0050908	detection of light stimulus involved in visual perception	14	-0.507139	-1.33667	regression	0.133046	0.4959	0.439244
GO:0050962	detection of light stimulus involved in sensory perception	14	-0.507139	-1.33667	regression	0.133046	0.4959	0.439244
GO:0007588	excretion	54	-0.341953	-1.24478	regression	0.133171	0.496047	0.439374
GO:0120034	positive regulation of plasma membrane bounded cell projection assembly	79	-0.311173	-1.21733	regression	0.133313	0.49609	0.439412
GO:0071241	cellular response to inorganic substance	158	-0.268286	-1.17076	regression	0.133353	0.49609	0.439412
GO:0042100	B cell proliferation	70	-0.320236	-1.22544	regression	0.133451	0.496138	0.439455
GO:0060452	positive regulation of cardiac muscle contraction	11	-0.546856	-1.34743	regression	0.133545	0.496169	0.439483
GO:0060415	muscle tissue morphogenesis	67	0.334021	1.23627	regression	0.133826	0.496869	0.440102
GO:0040036	regulation of fibroblast growth factor receptor signaling pathway	23	-0.434541	-1.30432	regression	0.133904	0.496869	0.440102
GO:1904036	negative regulation of epithelial cell apoptotic process	32	0.403709	1.28542	regression	0.134162	0.497233	0.440424
GO:0042634	regulation of hair cycle	21	-0.446613	-1.31032	regression	0.134173	0.497233	0.440424
GO:0006837	serotonin transport	12	-0.531368	-1.3425	regression	0.134402	0.497766	0.440897
GO:0101023	vascular endothelial cell proliferation	18	0.476489	1.32102	regression	0.13462	0.497941	0.441052
GO:1905562	regulation of vascular endothelial cell proliferation	18	0.476489	1.32102	regression	0.13462	0.497941	0.441052
GO:0044089	positive regulation of cellular component biogenesis	448	-0.226508	-1.11078	regression	0.134747	0.498094	0.441187
GO:0007099	centriole replication	25	0.432501	1.30035	regression	0.134864	0.49821	0.44129
GO:0060191	regulation of lipase activity	71	-0.318658	-1.22269	regression	0.135068	0.498648	0.441678
GO:0060999	positive regulation of dendritic spine development	37	-0.377682	-1.26904	regression	0.135188	0.49872	0.441742
GO:0000732	strand displacement	24	0.437116	1.30161	regression	0.135376	0.49872	0.441742
GO:0007039	protein catabolic process in the vacuole	14	0.51338	1.33313	regression	0.135394	0.49872	0.441742
GO:0061003	positive regulation of dendritic spine morphogenesis	17	-0.475865	-1.32142	regression	0.13543	0.49872	0.441742
GO:1900076	regulation of cellular response to insulin stimulus	62	-0.329257	-1.23142	regression	0.13596	0.499922	0.442807
GO:0071481	cellular response to X-ray	12	0.537488	1.33907	regression	0.13605	0.499922	0.442807
GO:0042448	progesterone metabolic process	17	-0.475447	-1.32025	regression	0.136167	0.499922	0.442807
GO:0002323	natural killer cell activation involved in immune response	15	-0.494307	-1.32784	regression	0.136208	0.499922	0.442807
GO:0070757	interleukin-35-mediated signaling pathway	11	0.551935	1.34342	regression	0.136238	0.499922	0.442807
GO:0032732	positive regulation of interleukin-1 production	38	-0.374494	-1.26559	regression	0.136272	0.499922	0.442807
GO:0071216	cellular response to biotic stimulus	172	-0.263466	-1.1629	regression	0.136438	0.500214	0.443065
GO:0032602	chemokine production	68	0.331885	1.23166	regression	0.136916	0.501358	0.444079
GO:0090148	membrane fission	11	0.551455	1.34225	regression	0.136996	0.501358	0.444079
GO:0006353	DNA-templated transcription, termination	97	0.306468	1.20862	regression	0.137008	0.501358	0.444079
GO:0002673	regulation of acute inflammatory response	66	-0.32372	-1.22511	regression	0.137192	0.501395	0.444111
GO:0048545	response to steroid hormone	346	0.245018	1.13566	regression	0.137228	0.501395	0.444111
GO:0034333	adherens junction assembly	77	0.322424	1.22319	regression	0.137276	0.501395	0.444111
GO:0010884	positive regulation of lipid storage	17	0.482793	1.31917	regression	0.138034	0.503845	0.446281
GO:0042742	defense response to bacterium	170	-0.263658	-1.16193	regression	0.138252	0.504049	0.446462
GO:0055002	striated muscle cell development	126	-0.279518	-1.18071	regression	0.138263	0.504049	0.446462
GO:0006491	N-glycan processing	17	-0.474111	-1.31654	regression	0.138452	0.504423	0.446793
GO:0071260	cellular response to mechanical stimulus	67	0.332484	1.23059	regression	0.138654	0.504843	0.447165
GO:0016055	Wnt signaling pathway	437	-0.226813	-1.10977	regression	0.138933	0.505543	0.447785
GO:0031341	regulation of cell killing	59	-0.332309	-1.23103	regression	0.139321	0.506638	0.448756
GO:0007034	vacuolar transport	109	0.298367	1.19835	regression	0.139837	0.508196	0.450135
GO:0048675	axon extension	107	-0.288853	-1.18973	regression	0.139929	0.508208	0.450145
GO:2001238	positive regulation of extrinsic apoptotic signaling pathway	42	0.372863	1.25919	regression	0.140169	0.508208	0.450145
GO:0071548	response to dexamethasone	40	-0.367671	-1.2566	regression	0.140177	0.508208	0.450145
GO:0030889	negative regulation of B cell proliferation	16	-0.482115	-1.31765	regression	0.140189	0.508208	0.450145
GO:0003206	cardiac chamber morphogenesis	111	0.296909	1.19595	regression	0.140929	0.510572	0.45224
GO:0018216	peptidyl-arginine methylation	15	-0.491402	-1.32004	regression	0.141356	0.511622	0.453169
GO:0097352	autophagosome maturation	30	0.40779	1.27941	regression	0.141455	0.511622	0.453169
GO:0010506	regulation of autophagy	278	0.252245	1.14369	regression	0.141482	0.511622	0.453169
GO:0072331	signal transduction by p53 class mediator	241	0.257861	1.15095	regression	0.141949	0.51299	0.454382
GO:0035735	intraciliary transport involved in cilium assembly	34	0.393298	1.26944	regression	0.142413	0.51415	0.455409
GO:0048846	axon extension involved in axon guidance	31	-0.394234	-1.27156	regression	0.142535	0.51415	0.455409
GO:1902284	neuron projection extension involved in neuron projection guidance	31	-0.394234	-1.27156	regression	0.142535	0.51415	0.455409
GO:0090335	regulation of brown fat cell differentiation	10	-0.557417	-1.33642	regression	0.143375	0.516739	0.457702
GO:0030858	positive regulation of epithelial cell differentiation	54	0.34861	1.23883	regression	0.14343	0.516739	0.457702
GO:0031112	positive regulation of microtubule polymerization or depolymerization	29	0.410655	1.27846	regression	0.143616	0.516963	0.4579
GO:0042733	embryonic digit morphogenesis	57	0.343993	1.23539	regression	0.14367	0.516963	0.4579
GO:1904707	positive regulation of vascular smooth muscle cell proliferation	23	-0.42966	-1.28967	regression	0.14398	0.51736	0.458252
GO:0031579	membrane raft organization	20	0.456842	1.30035	regression	0.144085	0.51736	0.458252
GO:0050879	multicellular organismal movement	41	0.373636	1.2557	regression	0.144136	0.51736	0.458252
GO:0050881	musculoskeletal movement	41	0.373636	1.2557	regression	0.144136	0.51736	0.458252
GO:0042095	interferon-gamma biosynthetic process	16	-0.479843	-1.31144	regression	0.144334	0.517754	0.458601
GO:0031348	negative regulation of defense response	150	-0.268833	-1.16476	regression	0.144474	0.517937	0.458763
GO:0003014	renal system process	100	0.302515	1.19872	regression	0.144648	0.518147	0.45895
GO:0001779	natural killer cell differentiation	17	-0.470692	-1.30705	regression	0.144725	0.518147	0.45895
GO:0009566	fertilization	133	-0.275095	-1.17131	regression	0.1448	0.518147	0.45895
GO:0050684	regulation of mRNA processing	109	0.297122	1.19335	regression	0.144988	0.518225	0.459018
GO:0051188	cofactor biosynthetic process	257	0.254738	1.14521	regression	0.145	0.518225	0.459018
GO:0043568	positive regulation of insulin-like growth factor receptor signaling pathway	11	-0.539439	-1.32915	regression	0.145117	0.518325	0.459107
GO:0008209	androgen metabolic process	25	0.427517	1.28537	regression	0.145229	0.518407	0.459179
GO:0007584	response to nutrient	182	-0.2591	-1.15216	regression	0.145436	0.518829	0.459553
GO:0034312	diol biosynthetic process	14	0.507367	1.31752	regression	0.145635	0.519038	0.459738
GO:0045722	positive regulation of gluconeogenesis	11	0.54594	1.32883	regression	0.1457	0.519038	0.459738
GO:0043117	positive regulation of vascular permeability	10	-0.555884	-1.33274	regression	0.145762	0.519038	0.459738
GO:0042982	amyloid precursor protein metabolic process	47	0.359959	1.24427	regression	0.146116	0.519352	0.460016
GO:1904738	vascular associated smooth muscle cell migration	19	0.462834	1.30061	regression	0.146173	0.519352	0.460016
GO:1904752	regulation of vascular associated smooth muscle cell migration	19	0.462834	1.30061	regression	0.146173	0.519352	0.460016
GO:0001975	response to amphetamine	24	-0.423032	-1.28325	regression	0.146207	0.519352	0.460016
GO:0071474	cellular hyperosmotic response	11	0.545291	1.32725	regression	0.146727	0.52088	0.46137
GO:0050849	negative regulation of calcium-mediated signaling	15	0.496439	1.31282	regression	0.146923	0.521236	0.461685
GO:0060041	retina development in camera-type eye	123	-0.278951	-1.17402	regression	0.147015	0.521236	0.461685
GO:0046854	phosphatidylinositol phosphorylation	87	-0.300579	-1.19592	regression	0.147096	0.521236	0.461685
GO:1902116	negative regulation of organelle assembly	28	0.413255	1.27637	regression	0.147282	0.521374	0.461808
GO:0048668	collateral sprouting	25	0.42653	1.2824	regression	0.147314	0.521374	0.461808
GO:0042088	T-helper 1 type immune response	34	-0.382005	-1.2589	regression	0.147431	0.521472	0.461894
GO:0006119	oxidative phosphorylation	100	-0.291233	-1.1862	regression	0.147689	0.521827	0.462209
GO:0048524	positive regulation of viral process	97	0.303723	1.19779	regression	0.147711	0.521827	0.462209
GO:0046459	short-chain fatty acid metabolic process	13	0.517254	1.31683	regression	0.147916	0.522153	0.462498
GO:0051204	protein insertion into mitochondrial membrane	31	-0.39189	-1.264	regression	0.147982	0.522153	0.462498
GO:0014031	mesenchymal cell development	69	0.327335	1.21794	regression	0.148141	0.52228	0.46261
GO:2000778	positive regulation of interleukin-6 secretion	19	-0.453065	-1.29546	regression	0.148198	0.52228	0.46261
GO:0036124	histone H3-K9 trimethylation	14	0.50579	1.31342	regression	0.148463	0.522508	0.462812
GO:0051236	establishment of RNA localization	179	0.269744	1.1619	regression	0.148529	0.522508	0.462812
GO:0070168	negative regulation of biomineral tissue development	16	0.485893	1.30668	regression	0.148531	0.522508	0.462812
GO:0007173	epidermal growth factor receptor signaling pathway	118	0.291524	1.18517	regression	0.148792	0.523107	0.463343
GO:0010038	response to metal ion	292	0.249266	1.13597	regression	0.148961	0.523387	0.463591
GO:0198738	cell-cell signaling by wnt	439	-0.22548	-1.10368	regression	0.149336	0.524386	0.464475
GO:0071549	cellular response to dexamethasone stimulus	32	-0.387726	-1.25986	regression	0.149529	0.524747	0.464795
GO:0042866	pyruvate biosynthetic process	89	0.308799	1.20047	regression	0.149927	0.52546	0.465427
GO:0045624	positive regulation of T-helper cell differentiation	17	-0.46786	-1.29919	regression	0.149959	0.52546	0.465427
GO:0032528	microvillus organization	23	0.435616	1.28389	regression	0.150003	0.52546	0.465427
GO:0043542	endothelial cell migration	168	-0.262025	-1.15294	regression	0.150345	0.525677	0.465619
GO:0019432	triglyceride biosynthetic process	31	0.400414	1.26566	regression	0.150463	0.525677	0.465619
GO:0031398	positive regulation of protein ubiquitination	85	-0.301257	-1.19371	regression	0.150665	0.525677	0.465619
GO:0035458	cellular response to interferon-beta	10	-0.552864	-1.3255	regression	0.150698	0.525677	0.465619
GO:0050768	negative regulation of neurogenesis	241	0.256375	1.14432	regression	0.1507	0.525677	0.465619
GO:1901861	regulation of muscle tissue development	116	0.292093	1.18431	regression	0.150781	0.525677	0.465619
GO:0015718	monocarboxylic acid transport	132	-0.27423	-1.16632	regression	0.150847	0.525677	0.465619
GO:0050918	positive chemotaxis	48	-0.346506	-1.2315	regression	0.150895	0.525677	0.465619
GO:0061383	trabecula morphogenesis	45	0.362282	1.24092	regression	0.151016	0.525677	0.465619
GO:0009247	glycolipid biosynthetic process	58	-0.330066	-1.21844	regression	0.151303	0.525677	0.465619
GO:0035883	enteroendocrine cell differentiation	21	0.446812	1.28741	regression	0.15146	0.525677	0.465619
GO:0022617	extracellular matrix disassembly	87	0.309831	1.20016	regression	0.151508	0.525677	0.465619
GO:1903299	regulation of hexokinase activity	10	-0.552352	-1.32427	regression	0.151538	0.525677	0.465619
GO:0055025	positive regulation of cardiac muscle tissue development	38	0.378274	1.2511	regression	0.151674	0.525677	0.465619
GO:0051648	vesicle localization	238	-0.246182	-1.13202	regression	0.151943	0.525677	0.465619
GO:0042632	cholesterol homeostasis	57	0.341356	1.22592	regression	0.151977	0.525677	0.465619
GO:0055092	sterol homeostasis	57	0.341356	1.22592	regression	0.151977	0.525677	0.465619
GO:0001759	organ induction	16	0.484022	1.30165	regression	0.151978	0.525677	0.465619
GO:0006590	thyroid hormone generation	13	-0.507532	-1.31134	regression	0.152006	0.525677	0.465619
GO:1900739	regulation of protein insertion into mitochondrial membrane involved in apoptotic signaling pathway	27	-0.405934	-1.26698	regression	0.15203	0.525677	0.465619
GO:1900740	positive regulation of protein insertion into mitochondrial membrane involved in apoptotic signaling pathway	27	-0.405934	-1.26698	regression	0.15203	0.525677	0.465619
GO:0034446	substrate adhesion-dependent cell spreading	69	0.326154	1.21354	regression	0.152051	0.525677	0.465619
GO:0018209	peptidyl-serine modification	277	-0.240357	-1.12401	regression	0.152222	0.525956	0.465866
GO:0030856	regulation of epithelial cell differentiation	125	0.287356	1.17822	regression	0.152597	0.52694	0.466738
GO:0009048	dosage compensation by inactivation of X chromosome	11	0.541688	1.31848	regression	0.152759	0.527187	0.466956
GO:0039692	single stranded viral RNA replication via double stranded DNA intermediate	10	-0.551486	-1.3222	regression	0.152959	0.527564	0.46729
GO:0032148	activation of protein kinase B activity	29	-0.396865	-1.26045	regression	0.153242	0.527591	0.467314
GO:0009113	purine nucleobase biosynthetic process	12	0.527166	1.31335	regression	0.153296	0.527591	0.467314
GO:0031100	animal organ regeneration	68	0.326846	1.21296	regression	0.153578	0.527591	0.467314
GO:0016998	cell wall macromolecule catabolic process	10	-0.551072	-1.3212	regression	0.153646	0.527591	0.467314
GO:0016101	diterpenoid metabolic process	79	-0.30564	-1.19568	regression	0.153653	0.527591	0.467314
GO:2000696	regulation of epithelial cell differentiation involved in kidney development	16	-0.4748	-1.29765	regression	0.153705	0.527591	0.467314
GO:0000245	spliceosomal complex assembly	55	0.343646	1.22548	regression	0.153778	0.527591	0.467314
GO:0006699	bile acid biosynthetic process	26	0.418762	1.2711	regression	0.153793	0.527591	0.467314
GO:0051058	negative regulation of small GTPase mediated signal transduction	47	-0.347435	-1.22909	regression	0.153889	0.527591	0.467314
GO:1901607	alpha-amino acid biosynthetic process	54	0.345186	1.22666	regression	0.153979	0.527591	0.467314
GO:0002822	regulation of adaptive immune response based on somatic recombination of immune receptors built from immunoglobulin superfamily domains	104	-0.287482	-1.17831	regression	0.154039	0.527591	0.467314
GO:0042730	fibrinolysis	18	-0.457813	-1.29046	regression	0.154054	0.527591	0.467314
GO:0045780	positive regulation of bone resorption	15	0.492356	1.30202	regression	0.154366	0.527955	0.467636
GO:0046852	positive regulation of bone remodeling	15	0.492356	1.30202	regression	0.154366	0.527955	0.467636
GO:0003197	endocardial cushion development	35	0.385381	1.25225	regression	0.154511	0.527955	0.467636
GO:1905475	regulation of protein localization to membrane	145	-0.268617	-1.15808	regression	0.154537	0.527955	0.467636
GO:2000181	negative regulation of blood vessel morphogenesis	95	-0.292967	-1.18311	regression	0.154656	0.527955	0.467636
GO:0060065	uterus development	17	-0.465363	-1.29225	regression	0.154782	0.527955	0.467636
GO:0043434	response to peptide hormone	384	-0.228847	-1.10664	regression	0.154795	0.527955	0.467636
GO:0045655	regulation of monocyte differentiation	17	-0.465268	-1.29199	regression	0.154943	0.52815	0.467809
GO:0000375	RNA splicing, via transesterification reactions	302	0.247162	1.13028	regression	0.155129	0.528292	0.467935
GO:0035767	endothelial cell chemotaxis	25	-0.41392	-1.26819	regression	0.155166	0.528292	0.467935
GO:0021510	spinal cord development	91	0.305866	1.19369	regression	0.155359	0.52864	0.468243
GO:2000114	regulation of establishment of cell polarity	20	0.451125	1.28408	regression	0.155568	0.529041	0.468599
GO:0046466	membrane lipid catabolic process	23	-0.424235	-1.27339	regression	0.155682	0.529118	0.468667
GO:0051386	regulation of neurotrophin TRK receptor signaling pathway	10	-0.549682	-1.31787	regression	0.155932	0.529658	0.469145
GO:0051969	regulation of transmission of nerve impulse	13	0.512674	1.30517	regression	0.156045	0.529667	0.469153
GO:0090200	positive regulation of release of cytochrome c from mitochondria	24	-0.418538	-1.26962	regression	0.156116	0.529667	0.469153
GO:0072567	chemokine (C-X-C motif) ligand 2 production	10	-0.54932	-1.317	regression	0.156422	0.530248	0.469668
GO:0045161	neuronal ion channel clustering	11	0.539564	1.31331	regression	0.15647	0.530248	0.469668
GO:1990440	positive regulation of transcription from RNA polymerase II promoter in response to endoplasmic reticulum stress	11	-0.532577	-1.31224	regression	0.156602	0.530282	0.469698
GO:0001946	lymphangiogenesis	14	-0.493499	-1.30071	regression	0.156688	0.530282	0.469698
GO:0060856	establishment of blood-brain barrier	10	-0.549141	-1.31657	regression	0.156753	0.530282	0.469698
GO:1904589	regulation of protein import	52	-0.337414	-1.21882	regression	0.156914	0.530326	0.469737
GO:1990845	adaptive thermogenesis	14	0.501066	1.30116	regression	0.157002	0.530326	0.469737
GO:0070229	negative regulation of lymphocyte apoptotic process	26	0.417356	1.26683	regression	0.157053	0.530326	0.469737
GO:0021903	rostrocaudal neural tube patterning	11	-0.532282	-1.31152	regression	0.15713	0.530326	0.469737
GO:0046500	S-adenosylmethionine metabolic process	12	0.524781	1.30741	regression	0.157494	0.531117	0.470437
GO:0032680	regulation of tumor necrosis factor production	100	-0.288956	-1.17693	regression	0.157611	0.531117	0.470437
GO:0050954	sensory perception of mechanical stimulus	141	-0.269412	-1.15691	regression	0.157862	0.531117	0.470437
GO:0035304	regulation of protein dephosphorylation	110	-0.28323	-1.17164	regression	0.157905	0.531117	0.470437
GO:0008038	neuron recognition	30	-0.391329	-1.25275	regression	0.158007	0.531117	0.470437
GO:0032414	positive regulation of ion transmembrane transporter activity	81	-0.302709	-1.18954	regression	0.158095	0.531117	0.470437
GO:0048639	positive regulation of developmental growth	152	-0.265621	-1.15294	regression	0.158234	0.531117	0.470437
GO:0050657	nucleic acid transport	176	0.268653	1.15475	regression	0.15824	0.531117	0.470437
GO:0050658	RNA transport	176	0.268653	1.15475	regression	0.15824	0.531117	0.470437
GO:0019098	reproductive behavior	26	-0.407816	-1.26137	regression	0.158354	0.531117	0.470437
GO:0030728	ovulation	18	-0.455581	-1.28416	regression	0.158391	0.531117	0.470437
GO:0032731	positive regulation of interleukin-1 beta production	32	-0.384245	-1.24855	regression	0.158459	0.531117	0.470437
GO:0072673	lamellipodium morphogenesis	17	0.471886	1.28937	regression	0.158704	0.53163	0.470892
GO:0035337	fatty-acyl-CoA metabolic process	35	0.383487	1.24609	regression	0.159428	0.533363	0.472427
GO:0051701	interaction with host	187	0.265616	1.15035	regression	0.15953	0.533363	0.472427
GO:0009952	anterior/posterior pattern specification	164	0.271791	1.15751	regression	0.159532	0.533363	0.472427
GO:0014823	response to activity	57	0.338976	1.21737	regression	0.159588	0.533363	0.472427
GO:0015849	organic acid transport	263	-0.241207	-1.12154	regression	0.160092	0.534099	0.473078
GO:0046942	carboxylic acid transport	263	-0.241207	-1.12154	regression	0.160092	0.534099	0.473078
GO:0048339	paraxial mesoderm development	17	-0.46267	-1.28477	regression	0.160133	0.534099	0.473078
GO:0016322	neuron remodeling	10	-0.547103	-1.31169	regression	0.160175	0.534099	0.473078
GO:0031952	regulation of protein autophosphorylation	38	0.375082	1.24054	regression	0.160272	0.534117	0.473095
GO:0009948	anterior/posterior axis specification	35	0.383114	1.24488	regression	0.160474	0.534485	0.47342
GO:0071466	cellular response to xenobiotic stimulus	145	-0.267459	-1.15309	regression	0.160847	0.535421	0.474249
GO:0001710	mesodermal cell fate commitment	18	0.462767	1.28298	regression	0.161176	0.535669	0.474469
GO:0007064	mitotic sister chromatid cohesion	22	0.436261	1.2716	regression	0.16122	0.535669	0.474469
GO:0007528	neuromuscular junction development	44	-0.351123	-1.22523	regression	0.161259	0.535669	0.474469
GO:0086067	AV node cell to bundle of His cell communication	10	-0.54642	-1.31005	regression	0.16129	0.535669	0.474469
GO:0030149	sphingolipid catabolic process	20	-0.439802	-1.2743	regression	0.16141	0.535765	0.474554
GO:0014075	response to amine	36	-0.370464	-1.23689	regression	0.161899	0.536738	0.475416
GO:0016570	histone modification	405	0.236667	1.11322	regression	0.161925	0.536738	0.475416
GO:0033762	response to glucagon	44	-0.35086	-1.22431	regression	0.162051	0.536738	0.475416
GO:0061684	chaperone-mediated autophagy	12	0.522153	1.30086	regression	0.16222	0.536738	0.475416
GO:0002070	epithelial cell maturation	13	0.50931	1.2966	regression	0.162313	0.536738	0.475416
GO:1901096	regulation of autophagosome maturation	10	0.551716	1.3081	regression	0.162317	0.536738	0.475416
GO:0055024	regulation of cardiac muscle tissue development	66	0.326586	1.20554	regression	0.162349	0.536738	0.475416
GO:0090288	negative regulation of cellular response to growth factor stimulus	119	0.287928	1.17199	regression	0.162655	0.537444	0.476041
GO:0036293	response to decreased oxygen levels	312	-0.234741	-1.11206	regression	0.162941	0.538084	0.476608
GO:0010919	regulation of inositol phosphate biosynthetic process	12	-0.514165	-1.29904	regression	0.163103	0.538313	0.476811
GO:0007569	cell aging	93	-0.292238	-1.17603	regression	0.163346	0.538327	0.476824
GO:0072171	mesonephric tubule morphogenesis	52	0.345278	1.2181	regression	0.163412	0.538327	0.476824
GO:0043536	positive regulation of blood vessel endothelial cell migration	52	-0.33539	-1.21151	regression	0.16344	0.538327	0.476824
GO:0002495	antigen processing and presentation of peptide antigen via MHC class II	89	-0.295019	-1.17852	regression	0.163504	0.538327	0.476824
GO:0048681	negative regulation of axon regeneration	13	0.508634	1.29488	regression	0.163569	0.538327	0.476824
GO:0051938	L-glutamate import	11	-0.52831	-1.30173	regression	0.163961	0.539101	0.477509
GO:0034330	cell junction organization	247	0.253277	1.13367	regression	0.164044	0.539101	0.477509
GO:0051205	protein insertion into membrane	42	-0.354333	-1.22417	regression	0.164093	0.539101	0.477509
GO:2000116	regulation of cysteine-type endopeptidase activity	216	0.258665	1.14021	regression	0.16424	0.539101	0.477509
GO:0032225	regulation of synaptic transmission, dopaminergic	15	-0.47899	-1.2867	regression	0.164428	0.539101	0.477509
GO:0048149	behavioral response to ethanol	12	-0.513364	-1.29701	regression	0.164544	0.539101	0.477509
GO:0035909	aorta morphogenesis	32	0.391239	1.24571	regression	0.164673	0.539101	0.477509
GO:1902514	regulation of calcium ion transmembrane transport via high voltage-gated calcium channel	10	-0.544501	-1.30545	regression	0.164688	0.539101	0.477509
GO:0009162	deoxyribonucleoside monophosphate metabolic process	12	0.520792	1.29747	regression	0.164729	0.539101	0.477509
GO:0031102	neuron projection regeneration	49	0.35002	1.22	regression	0.16473	0.539101	0.477509
GO:0016052	carbohydrate catabolic process	153	0.274177	1.15674	regression	0.165055	0.539572	0.477926
GO:0006473	protein acetylation	170	0.269064	1.15128	regression	0.16506	0.539572	0.477926
GO:0006658	phosphatidylserine metabolic process	24	-0.414555	-1.25753	regression	0.165264	0.539938	0.47825
GO:0042135	neurotransmitter catabolic process	20	0.446477	1.27085	regression	0.165462	0.540113	0.478405
GO:0006465	signal peptide processing	21	-0.431487	-1.26595	regression	0.165503	0.540113	0.478405
GO:0007052	mitotic spindle organization	97	0.299188	1.17991	regression	0.166138	0.54188	0.47997
GO:0071281	cellular response to iron ion	10	0.54951	1.30287	regression	0.16627	0.542005	0.480082
GO:0042754	negative regulation of circadian rhythm	14	-0.488221	-1.2868	regression	0.166513	0.542496	0.480517
GO:1903364	positive regulation of cellular protein catabolic process	127	-0.273181	-1.15534	regression	0.166781	0.542972	0.480938
GO:0051409	response to nitrosative stress	10	-0.54322	-1.30238	regression	0.166877	0.542972	0.480938
GO:0021697	cerebellar cortex formation	19	0.452554	1.27172	regression	0.166944	0.542972	0.480938
GO:0021801	cerebral cortex radial glia guided migration	18	-0.45135	-1.27224	regression	0.167126	0.542972	0.480938
GO:0022030	telencephalon glial cell migration	18	-0.45135	-1.27224	regression	0.167126	0.542972	0.480938
GO:0072337	modified amino acid transport	18	0.459786	1.27471	regression	0.167365	0.543445	0.481357
GO:0044282	small molecule catabolic process	366	0.23907	1.11397	regression	0.16785	0.544645	0.48242
GO:0033630	positive regulation of cell adhesion mediated by integrin	13	-0.498726	-1.28858	regression	0.168011	0.544645	0.48242
GO:0021984	adenohypophysis development	10	-0.542532	-1.30073	regression	0.168095	0.544645	0.48242
GO:0006622	protein targeting to lysosome	18	0.459438	1.27375	regression	0.168109	0.544645	0.48242
GO:0051988	regulation of attachment of spindle microtubules to kinetochore	11	-0.525824	-1.2956	regression	0.168504	0.545622	0.483285
GO:0042226	interleukin-6 biosynthetic process	14	-0.486718	-1.28284	regression	0.169444	0.547017	0.484521
GO:0046716	muscle cell cellular homeostasis	16	0.474963	1.27729	regression	0.169489	0.547017	0.484521
GO:1990173	protein localization to nucleoplasm	10	-0.54169	-1.29871	regression	0.169496	0.547017	0.484521
GO:0086070	SA node cell to atrial cardiac muscle cell communication	10	-0.541655	-1.29863	regression	0.16956	0.547017	0.484521
GO:0071236	cellular response to antibiotic	120	-0.275827	-1.15647	regression	0.169742	0.547017	0.484521
GO:0045445	myoblast differentiation	72	0.318261	1.19308	regression	0.169755	0.547017	0.484521
GO:0021978	telencephalon regionalization	11	0.531884	1.29462	regression	0.169896	0.547017	0.484521
GO:0035090	maintenance of apical/basal cell polarity	10	0.547319	1.29767	regression	0.169922	0.547017	0.484521
GO:0045199	maintenance of epithelial cell apical/basal polarity	10	0.547319	1.29767	regression	0.169922	0.547017	0.484521
GO:1901213	regulation of transcription from RNA polymerase II promoter involved in heart development	11	0.531852	1.29454	regression	0.169952	0.547017	0.484521
GO:0022600	digestive system process	78	-0.302443	-1.18051	regression	0.169968	0.547017	0.484521
GO:0008344	adult locomotory behavior	67	0.323329	1.1967	regression	0.170079	0.547073	0.48457
GO:0032965	regulation of collagen biosynthetic process	28	0.403444	1.24607	regression	0.170357	0.547234	0.484713
GO:0034086	maintenance of sister chromatid cohesion	11	0.531419	1.29349	regression	0.170686	0.547234	0.484713
GO:0034088	maintenance of mitotic sister chromatid cohesion	11	0.531419	1.29349	regression	0.170686	0.547234	0.484713
GO:0071706	tumor necrosis factor superfamily cytokine production	107	-0.282084	-1.16185	regression	0.170846	0.547234	0.484713
GO:0032874	positive regulation of stress-activated MAPK cascade	124	-0.273801	-1.15382	regression	0.170857	0.547234	0.484713
GO:0009415	response to water	12	0.517352	1.2889	regression	0.170952	0.547234	0.484713
GO:0009129	pyrimidine nucleoside monophosphate metabolic process	15	0.483503	1.27861	regression	0.171038	0.547234	0.484713
GO:0010769	regulation of cell morphogenesis involved in differentiation	252	-0.241257	-1.11659	regression	0.171165	0.547234	0.484713
GO:0045989	positive regulation of striated muscle contraction	14	-0.485819	-1.28047	regression	0.171205	0.547234	0.484713
GO:0010721	negative regulation of cell development	276	0.248079	1.12393	regression	0.171209	0.547234	0.484713
GO:0007338	single fertilization	104	-0.283767	-1.16308	regression	0.171253	0.547234	0.484713
GO:0055012	ventricular cardiac muscle cell differentiation	16	0.474072	1.27489	regression	0.171275	0.547234	0.484713
GO:2000765	regulation of cytoplasmic translation	21	0.437524	1.26065	regression	0.171351	0.547234	0.484713
GO:0009083	branched-chain amino acid catabolic process	20	0.443702	1.26295	regression	0.171582	0.547669	0.485098
GO:0072087	renal vesicle development	18	0.457701	1.26893	regression	0.171799	0.54794	0.485338
GO:0030819	positive regulation of cAMP biosynthetic process	20	-0.434867	-1.26	regression	0.171893	0.54794	0.485338
GO:0070482	response to oxygen levels	333	-0.231499	-1.1041	regression	0.171949	0.54794	0.485338
GO:0070555	response to interleukin-1	162	-0.259963	-1.13825	regression	0.172166	0.548331	0.485685
GO:0032411	positive regulation of transporter activity	89	-0.293037	-1.1706	regression	0.172308	0.548483	0.485819
GO:1904951	positive regulation of establishment of protein localization	405	-0.225327	-1.09505	regression	0.172624	0.548858	0.486151
GO:0045198	establishment of epithelial cell apical/basal polarity	11	-0.523447	-1.28975	regression	0.172745	0.548858	0.486151
GO:0050856	regulation of T cell receptor signaling pathway	31	-0.382068	-1.23232	regression	0.173065	0.548858	0.486151
GO:1990776	response to angiotensin	21	-0.428067	-1.25591	regression	0.173129	0.548858	0.486151
GO:0003323	type B pancreatic cell development	17	0.46485	1.27014	regression	0.173166	0.548858	0.486151
GO:0010882	regulation of cardiac muscle contraction by calcium ion signaling	23	0.425228	1.25327	regression	0.173308	0.548858	0.486151
GO:0032652	regulation of interleukin-1 production	62	-0.318358	-1.19066	regression	0.173384	0.548858	0.486151
GO:0045071	negative regulation of viral genome replication	49	0.347255	1.21036	regression	0.173461	0.548858	0.486151
GO:0021521	ventral spinal cord interneuron specification	10	0.545253	1.29277	regression	0.173476	0.548858	0.486151
GO:0060573	cell fate specification involved in pattern specification	10	0.545253	1.29277	regression	0.173476	0.548858	0.486151
GO:0035246	peptidyl-arginine N-methylation	11	-0.523046	-1.28876	regression	0.173485	0.548858	0.486151
GO:1902259	regulation of delayed rectifier potassium channel activity	15	-0.474353	-1.27424	regression	0.173557	0.548858	0.486151
GO:0001574	ganglioside biosynthetic process	10	-0.539308	-1.293	regression	0.173821	0.549306	0.486548
GO:0061307	cardiac neural crest cell differentiation involved in heart development	10	0.544944	1.29204	regression	0.173981	0.549306	0.486548
GO:0061308	cardiac neural crest cell development involved in heart development	10	0.544944	1.29204	regression	0.173981	0.549306	0.486548
GO:0030004	cellular monovalent inorganic cation homeostasis	99	0.29611	1.17158	regression	0.174263	0.549602	0.48681
GO:1903555	regulation of tumor necrosis factor superfamily cytokine production	103	-0.283635	-1.16073	regression	0.174264	0.549602	0.48681
GO:0033138	positive regulation of peptidyl-serine phosphorylation	79	-0.300508	-1.17561	regression	0.174371	0.54961	0.486817
GO:0007265	Ras protein signal transduction	405	-0.225135	-1.09411	regression	0.174455	0.54961	0.486817
GO:0048754	branching morphogenesis of an epithelial tube	131	0.280068	1.15631	regression	0.175242	0.551789	0.488748
GO:0021954	central nervous system neuron development	63	-0.316419	-1.18706	regression	0.175631	0.552714	0.489567
GO:0046514	ceramide catabolic process	11	-0.521778	-1.28564	regression	0.175728	0.552722	0.489574
GO:0072584	caveolin-mediated endocytosis	10	0.543678	1.28904	regression	0.17614	0.553718	0.490456
GO:0001101	response to acid chemical	292	-0.235351	-1.10712	regression	0.176447	0.554373	0.491036
GO:0060572	morphogenesis of an epithelial bud	14	0.490871	1.27468	regression	0.176538	0.554373	0.491036
GO:1902895	positive regulation of pri-miRNA transcription by RNA polymerase II	22	-0.420523	-1.24849	regression	0.17664	0.554393	0.491054
GO:0048844	artery morphogenesis	61	0.328643	1.19554	regression	0.177029	0.554729	0.491352
GO:0032527	protein exit from endoplasmic reticulum	37	0.371689	1.22205	regression	0.177097	0.554729	0.491352
GO:0032609	interferon-gamma production	85	-0.294885	-1.16846	regression	0.177109	0.554729	0.491352
GO:0001676	long-chain fatty acid metabolic process	79	-0.299856	-1.17306	regression	0.177286	0.554729	0.491352
GO:0018345	protein palmitoylation	30	0.393214	1.23368	regression	0.177423	0.554729	0.491352
GO:0060123	regulation of growth hormone secretion	13	-0.493716	-1.27564	regression	0.177534	0.554729	0.491352
GO:0097066	response to thyroid hormone	26	0.408884	1.24112	regression	0.177575	0.554729	0.491352
GO:0006949	syncytium formation	45	-0.343805	-1.20553	regression	0.17761	0.554729	0.491352
GO:0010390	histone monoubiquitination	25	0.41347	1.24313	regression	0.17767	0.554729	0.491352
GO:0061515	myeloid cell development	63	0.325911	1.19286	regression	0.1777	0.554729	0.491352
GO:0033002	muscle cell proliferation	165	-0.258212	-1.13344	regression	0.177817	0.554796	0.491411
GO:0000921	septin ring assembly	15	0.479973	1.26927	regression	0.178182	0.555474	0.492011
GO:0055013	cardiac muscle cell development	53	-0.329419	-1.1945	regression	0.178361	0.555474	0.492011
GO:0010888	negative regulation of lipid storage	15	0.479767	1.26873	regression	0.178576	0.555474	0.492011
GO:0009394	2'-deoxyribonucleotide metabolic process	28	-0.390847	-1.23088	regression	0.178842	0.555474	0.492011
GO:0090169	regulation of spindle assembly	23	0.422896	1.2464	regression	0.178862	0.555474	0.492011
GO:0046822	regulation of nucleocytoplasmic transport	93	-0.288819	-1.16227	regression	0.178877	0.555474	0.492011
GO:0006749	glutathione metabolic process	49	0.345531	1.20436	regression	0.178986	0.555474	0.492011
GO:0044036	cell wall macromolecule metabolic process	11	-0.519887	-1.28097	regression	0.179166	0.555474	0.492011
GO:0071554	cell wall organization or biogenesis	11	-0.519887	-1.28097	regression	0.179166	0.555474	0.492011
GO:0048839	inner ear development	164	-0.258257	-1.13274	regression	0.179194	0.555474	0.492011
GO:0009799	specification of symmetry	110	0.288917	1.16206	regression	0.179311	0.555474	0.492011
GO:0090153	regulation of sphingolipid biosynthetic process	12	-0.505273	-1.27657	regression	0.17937	0.555474	0.492011
GO:1905038	regulation of membrane lipid metabolic process	12	-0.505273	-1.27657	regression	0.17937	0.555474	0.492011
GO:2000303	regulation of ceramide biosynthetic process	12	-0.505273	-1.27657	regression	0.17937	0.555474	0.492011
GO:0048505	regulation of timing of cell differentiation	12	-0.505127	-1.2762	regression	0.179629	0.555981	0.49246
GO:0010662	regulation of striated muscle cell apoptotic process	30	0.392225	1.23057	regression	0.179902	0.556166	0.492624
GO:0001837	epithelial to mesenchymal transition	123	0.282588	1.15599	regression	0.179941	0.556166	0.492624
GO:0006636	unsaturated fatty acid biosynthetic process	37	-0.361369	-1.21423	regression	0.180124	0.556166	0.492624
GO:0051056	regulation of small GTPase mediated signal transduction	290	-0.235146	-1.1053	regression	0.180225	0.556166	0.492624
GO:2000647	negative regulation of stem cell proliferation	12	0.512479	1.27676	regression	0.180231	0.556166	0.492624
GO:0009130	pyrimidine nucleoside monophosphate biosynthetic process	14	0.488906	1.26958	regression	0.180305	0.556166	0.492624
GO:0050731	positive regulation of peptidyl-tyrosine phosphorylation	148	-0.263025	-1.13741	regression	0.180357	0.556166	0.492624
GO:0072017	distal tubule development	12	-0.504692	-1.2751	regression	0.180487	0.556271	0.492718
GO:0043372	positive regulation of CD4-positive, alpha-beta T cell differentiation	22	-0.418831	-1.24347	regression	0.180764	0.556411	0.492842
GO:0048736	appendage development	155	0.270689	1.14403	regression	0.180819	0.556411	0.492842
GO:0060173	limb development	155	0.270689	1.14403	regression	0.180819	0.556411	0.492842
GO:0048525	negative regulation of viral process	83	0.305677	1.1746	regression	0.181503	0.558014	0.494261
GO:0021772	olfactory bulb development	26	-0.398357	-1.23212	regression	0.181532	0.558014	0.494261
GO:0016569	covalent chromatin modification	416	0.233611	1.10148	regression	0.181796	0.558329	0.494541
GO:0006403	RNA localization	210	0.257044	1.12906	regression	0.181964	0.558329	0.494541
GO:0035089	establishment of apical/basal cell polarity	15	-0.470148	-1.26294	regression	0.181991	0.558329	0.494541
GO:0035065	regulation of histone acetylation	51	0.341357	1.19956	regression	0.182121	0.558329	0.494541
GO:0003230	cardiac atrium development	32	0.384799	1.22521	regression	0.182197	0.558329	0.494541
GO:0072310	glomerular epithelial cell development	11	0.525007	1.27788	regression	0.182248	0.558329	0.494541
GO:0032640	tumor necrosis factor production	103	-0.281989	-1.15399	regression	0.182306	0.558329	0.494541
GO:0000097	sulfur amino acid biosynthetic process	12	0.511262	1.27373	regression	0.182557	0.558806	0.494963
GO:0003309	type B pancreatic cell differentiation	19	0.445426	1.25169	regression	0.182695	0.558935	0.495077
GO:0031639	plasminogen activation	21	-0.423824	-1.24346	regression	0.182925	0.558935	0.495077
GO:0048011	neurotrophin TRK receptor signaling pathway	25	-0.402515	-1.23325	regression	0.182988	0.558935	0.495077
GO:0021700	developmental maturation	218	-0.245293	-1.11585	regression	0.183137	0.558935	0.495077
GO:1902884	positive regulation of response to oxidative stress	17	-0.451581	-1.25398	regression	0.183155	0.558935	0.495077
GO:0048875	chemical homeostasis within a tissue	10	-0.534055	-1.2804	regression	0.183257	0.558935	0.495077
GO:0009408	response to heat	148	-0.262521	-1.13523	regression	0.183346	0.558935	0.495077
GO:0046326	positive regulation of glucose import	38	0.367086	1.2141	regression	0.183488	0.558935	0.495077
GO:0002697	regulation of immune effector process	283	-0.235531	-1.10412	regression	0.183561	0.558935	0.495077
GO:0140056	organelle localization by membrane tethering	151	0.27144	1.14302	regression	0.183571	0.558935	0.495077
GO:1901653	cellular response to peptide	317	-0.231704	-1.09955	regression	0.183739	0.558935	0.495077
GO:1902074	response to salt	17	-0.451312	-1.25324	regression	0.183791	0.558935	0.495077
GO:0007020	microtubule nucleation	24	0.415731	1.23793	regression	0.183847	0.558935	0.495077
GO:0042098	T cell proliferation	147	-0.262688	-1.13481	regression	0.184105	0.559427	0.495513
GO:0043330	response to exogenous dsRNA	30	0.390474	1.22508	regression	0.184483	0.559627	0.49569
GO:0061437	renal system vasculature development	23	-0.411916	-1.23641	regression	0.184525	0.559627	0.49569
GO:0061440	kidney vasculature development	23	-0.411916	-1.23641	regression	0.184525	0.559627	0.49569
GO:0042129	regulation of T cell proliferation	126	-0.270352	-1.142	regression	0.184556	0.559627	0.49569
GO:0043254	regulation of protein complex assembly	381	-0.225832	-1.09126	regression	0.185062	0.560869	0.49679
GO:0010717	regulation of epithelial to mesenchymal transition	78	0.308847	1.17427	regression	0.185305	0.561031	0.496934
GO:0003281	ventricular septum development	61	0.3264	1.18738	regression	0.185367	0.561031	0.496934
GO:1905477	positive regulation of protein localization to membrane	108	-0.278684	-1.14942	regression	0.185404	0.561031	0.496934
GO:0040034	regulation of development, heterochronic	13	-0.489577	-1.26495	regression	0.185511	0.561063	0.496962
GO:0031529	ruffle organization	44	0.352973	1.20347	regression	0.185814	0.561688	0.497515
GO:0071364	cellular response to epidermal growth factor stimulus	38	0.36623	1.21127	regression	0.186036	0.561853	0.497662
GO:0097006	regulation of plasma lipoprotein particle levels	74	0.31213	1.17597	regression	0.186062	0.561853	0.497662
GO:0071599	otic vesicle development	13	0.496765	1.26467	regression	0.186266	0.561944	0.497742
GO:0006978	DNA damage response, signal transduction by p53 class mediator resulting in transcription of p21 class mediator	18	0.451118	1.25068	regression	0.186285	0.561944	0.497742
GO:0006022	aminoglycan metabolic process	149	-0.261628	-1.13241	regression	0.186591	0.562066	0.497851
GO:0008211	glucocorticoid metabolic process	21	-0.4223	-1.23899	regression	0.186596	0.562066	0.497851
GO:2000042	negative regulation of double-strand break repair via homologous recombination	10	-0.532173	-1.27589	regression	0.186627	0.562066	0.497851
GO:0042594	response to starvation	161	0.267838	1.13791	regression	0.186712	0.562066	0.497851
GO:2000586	regulation of platelet-derived growth factor receptor-beta signaling pathway	10	-0.532031	-1.27555	regression	0.186904	0.562115	0.497894
GO:0006900	vesicle budding from membrane	89	0.299907	1.1659	regression	0.186921	0.562115	0.497894
GO:0055094	response to lipoprotein particle	21	0.430728	1.24107	regression	0.187423	0.563052	0.498724
GO:0051567	histone H3-K9 methylation	28	0.396755	1.22541	regression	0.18777	0.563052	0.498724
GO:0030902	hindbrain development	130	-0.268124	-1.1378	regression	0.187823	0.563052	0.498724
GO:0006044	N-acetylglucosamine metabolic process	16	0.466158	1.25361	regression	0.187823	0.563052	0.498724
GO:0030574	collagen catabolic process	55	-0.323767	-1.18284	regression	0.187883	0.563052	0.498724
GO:0030488	tRNA methylation	31	0.38595	1.21994	regression	0.187917	0.563052	0.498724
GO:0032835	glomerulus development	51	-0.330027	-1.18745	regression	0.187988	0.563052	0.498724
GO:0006691	leukotriene metabolic process	20	-0.42779	-1.2395	regression	0.188006	0.563052	0.498724
GO:0032488	Cdc42 protein signal transduction	16	0.465887	1.25288	regression	0.188349	0.563789	0.499376
GO:0043583	ear development	188	-0.250724	-1.11971	regression	0.188572	0.564165	0.49971
GO:0003148	outflow tract septum morphogenesis	23	0.41879	1.2343	regression	0.188696	0.564248	0.499783
GO:0006757	ATP generation from ADP	86	0.301741	1.16648	regression	0.1888	0.564269	0.499802
GO:0071402	cellular response to lipoprotein particle stimulus	23	0.418702	1.23404	regression	0.188911	0.56431	0.499838
GO:0006308	DNA catabolic process	35	0.373015	1.21207	regression	0.189014	0.564327	0.499854
GO:0001844	protein insertion into mitochondrial membrane involved in apoptotic signaling pathway	28	-0.387015	-1.21881	regression	0.18922	0.564476	0.499985
GO:0016486	peptide hormone processing	32	-0.373075	-1.21225	regression	0.189258	0.564476	0.499985
GO:0035357	peroxisome proliferator activated receptor signaling pathway	17	0.457207	1.24926	regression	0.189368	0.564516	0.50002
GO:0033160	positive regulation of protein import into nucleus, translocation	11	-0.51436	-1.26736	regression	0.189546	0.564756	0.500233
GO:0032881	regulation of polysaccharide metabolic process	31	-0.376025	-1.21283	regression	0.189746	0.564893	0.500354
GO:2000001	regulation of DNA damage checkpoint	16	0.465195	1.25102	regression	0.189867	0.564893	0.500354
GO:0045765	regulation of angiogenesis	250	0.249162	1.1167	regression	0.189882	0.564893	0.500354
GO:0030859	polarized epithelial cell differentiation	15	-0.466228	-1.25241	regression	0.190224	0.56562	0.500998
GO:0098712	L-glutamate import across plasma membrane	10	-0.529992	-1.27066	regression	0.190522	0.566009	0.501343
GO:0016525	negative regulation of angiogenesis	93	-0.286405	-1.15255	regression	0.190549	0.566009	0.501343
GO:0032370	positive regulation of lipid transport	50	-0.330817	-1.18565	regression	0.190734	0.56622	0.50153
GO:0034311	diol metabolic process	16	0.464741	1.2498	regression	0.190815	0.56622	0.50153
GO:0043476	pigment accumulation	11	-0.513578	-1.26543	regression	0.191055	0.566357	0.501651
GO:0043482	cellular pigment accumulation	11	-0.513578	-1.26543	regression	0.191055	0.566357	0.501651
GO:0044380	protein localization to cytoskeleton	46	0.347475	1.19564	regression	0.191272	0.566531	0.501805
GO:0000737	DNA catabolic process, endonucleolytic	27	0.399379	1.22311	regression	0.191309	0.566531	0.501805
GO:0032228	regulation of synaptic transmission, GABAergic	28	-0.386131	-1.21603	regression	0.191573	0.566758	0.502006
GO:0051654	establishment of mitochondrion localization	22	0.423102	1.23325	regression	0.191727	0.566758	0.502006
GO:2000291	regulation of myoblast proliferation	15	0.47333	1.25171	regression	0.191748	0.566758	0.502006
GO:0072015	glomerular visceral epithelial cell development	10	0.535127	1.26877	regression	0.191914	0.566758	0.502006
GO:0007202	activation of phospholipase C activity	19	-0.432686	-1.23719	regression	0.191942	0.566758	0.502006
GO:0010923	negative regulation of phosphatase activity	90	-0.288106	-1.15305	regression	0.192024	0.566758	0.502006
GO:0090092	regulation of transmembrane receptor protein serine/threonine kinase signaling pathway	186	-0.250648	-1.11785	regression	0.192067	0.566758	0.502006
GO:0048845	venous blood vessel morphogenesis	10	0.534882	1.26819	regression	0.192381	0.567035	0.502252
GO:0031109	microtubule polymerization or depolymerization	92	0.296579	1.15949	regression	0.192681	0.567035	0.502252
GO:0031056	regulation of histone modification	128	0.278023	1.1439	regression	0.192706	0.567035	0.502252
GO:0046628	positive regulation of insulin receptor signaling pathway	13	-0.485778	-1.25513	regression	0.193048	0.567035	0.502252
GO:0002763	positive regulation of myeloid leukocyte differentiation	41	-0.347634	-1.19457	regression	0.19315	0.567035	0.502252
GO:0090630	activation of GTPase activity	74	0.31045	1.16964	regression	0.193206	0.567035	0.502252
GO:0042416	dopamine biosynthetic process	10	-0.52852	-1.26714	regression	0.193226	0.567035	0.502252
GO:0072006	nephron development	116	-0.273249	-1.13978	regression	0.193241	0.567035	0.502252
GO:0035335	peptidyl-tyrosine dephosphorylation	90	-0.287809	-1.15186	regression	0.193424	0.567035	0.502252
GO:0030299	intestinal cholesterol absorption	11	-0.512236	-1.26212	regression	0.193508	0.567035	0.502252
GO:0098856	intestinal lipid absorption	11	-0.512236	-1.26212	regression	0.193508	0.567035	0.502252
GO:0035066	positive regulation of histone acetylation	28	0.394592	1.21873	regression	0.193715	0.567035	0.502252
GO:0060236	regulation of mitotic spindle organization	32	0.380666	1.21204	regression	0.193801	0.567035	0.502252
GO:0051235	maintenance of location	276	0.245053	1.11022	regression	0.193803	0.567035	0.502252
GO:0071322	cellular response to carbohydrate stimulus	115	-0.273571	-1.13968	regression	0.193937	0.567035	0.502252
GO:1902065	response to L-glutamate	11	-0.511973	-1.26147	regression	0.194005	0.567035	0.502252
GO:0045760	positive regulation of action potential	10	-0.528123	-1.26618	regression	0.194026	0.567035	0.502252
GO:0014033	neural crest cell differentiation	73	0.311235	1.16955	regression	0.194041	0.567035	0.502252
GO:2000677	regulation of transcription regulatory region DNA binding	41	-0.347327	-1.19352	regression	0.19414	0.567035	0.502252
GO:0001959	regulation of cytokine-mediated signaling pathway	145	0.271477	1.13697	regression	0.194263	0.567035	0.502252
GO:0003044	regulation of systemic arterial blood pressure mediated by a chemical signal	43	-0.342976	-1.1908	regression	0.194329	0.567035	0.502252
GO:0072329	monocarboxylic acid catabolic process	108	0.286926	1.15086	regression	0.194346	0.567035	0.502252
GO:0006335	DNA replication-dependent nucleosome assembly	25	-0.398139	-1.21984	regression	0.194498	0.567035	0.502252
GO:0034723	DNA replication-dependent nucleosome organization	25	-0.398139	-1.21984	regression	0.194498	0.567035	0.502252
GO:0006956	complement activation	46	0.346358	1.1918	regression	0.194807	0.567646	0.502793
GO:0036150	phosphatidylserine acyl-chain remodeling	18	-0.438647	-1.23643	regression	0.194929	0.567646	0.502793
[truncated: 3,823 more rows]

## Sheet: sva
ID	Description	setSize	enrichmentScore	NES	correction	p.value	p.adjust	qvalues
GO:0010469	regulation of signaling receptor activity	424	-0.371293	-1.72645	sva	1.6006e-06	0.000584395	0.000522911
GO:0050804	modulation of chemical synaptic transmission	311	-0.470929	-2.12625	sva	1.64871e-06	0.000584395	0.000522911
GO:0099177	regulation of trans-synaptic signaling	311	-0.470929	-2.12625	sva	1.64871e-06	0.000584395	0.000522911
GO:0019932	second-messenger-mediated signaling	289	-0.416219	-1.86497	sva	1.66009e-06	0.000584395	0.000522911
GO:0050808	synapse organization	274	-0.44396	-1.97832	sva	1.66788e-06	0.000584395	0.000522911
GO:0050890	cognition	244	-0.491183	-2.16109	sva	1.68361e-06	0.000584395	0.000522911
GO:0007611	learning or memory	214	-0.519604	-2.25219	sva	1.70118e-06	0.000584395	0.000522911
GO:0017157	regulation of exocytosis	162	-0.460567	-1.92815	sva	1.73604e-06	0.000584395	0.000522911
GO:0048167	regulation of synaptic plasticity	158	-0.485011	-2.02395	sva	1.73853e-06	0.000584395	0.000522911
GO:0050803	regulation of synapse structure or activity	158	-0.482437	-2.01321	sva	1.73853e-06	0.000584395	0.000522911
GO:0050807	regulation of synapse organization	147	-0.484322	-2.00101	sva	1.74791e-06	0.000584395	0.000522911
GO:0050806	positive regulation of synaptic transmission	139	-0.502568	-2.06039	sva	1.75385e-06	0.000584395	0.000522911
GO:0007416	synapse assembly	134	-0.514804	-2.09949	sva	1.75866e-06	0.000584395	0.000522911
GO:0019935	cyclic-nucleotide-mediated signaling	134	-0.51996	-2.12052	sva	1.75866e-06	0.000584395	0.000522911
GO:0007612	learning	124	-0.551246	-2.22337	sva	1.76775e-06	0.000584395	0.000522911
GO:0019933	cAMP-mediated signaling	124	-0.509759	-2.05604	sva	1.76775e-06	0.000584395	0.000522911
GO:0007613	memory	104	-0.552459	-2.16977	sva	1.78559e-06	0.000584395	0.000522911
GO:0007218	neuropeptide signaling pathway	84	-0.595553	-2.25934	sva	1.80679e-06	0.000584395	0.000522911
GO:0023061	signal release	389	-0.380663	-1.75621	sva	3.22929e-06	0.000989523	0.000885416
GO:0060078	regulation of postsynaptic membrane potential	116	-0.492249	-1.96603	sva	3.54836e-06	0.00103293	0.000924254
GO:1903305	regulation of regulated secretory pathway	107	-0.508966	-2.00796	sva	5.3497e-06	0.00133381	0.00119348
GO:0035249	synaptic transmission, glutamatergic	87	-0.536153	-2.04599	sva	5.41188e-06	0.00133381	0.00119348
GO:0072347	response to anesthetic	65	-0.582874	-2.11393	sva	5.49529e-06	0.00133381	0.00119348
GO:0051966	regulation of synaptic transmission, glutamatergic	64	-0.582136	-2.10546	sva	5.49834e-06	0.00133381	0.00119348
GO:0031280	negative regulation of cyclase activity	23	-0.757507	-2.20391	sva	5.73475e-06	0.00133551	0.001195
GO:0010817	regulation of hormone levels	440	-0.352727	-1.64546	sva	7.97063e-06	0.00178481	0.00159703
GO:0007215	glutamate receptor signaling pathway	79	-0.536938	-2.01581	sva	9.06355e-06	0.00195437	0.00174875
GO:0051962	positive regulation of nervous system development	443	-0.350183	-1.63446	sva	9.56072e-06	0.00198795	0.0017788
GO:0008217	regulation of blood pressure	154	-0.441941	-1.83758	sva	1.0457e-05	0.00207206	0.00185406
GO:0099565	chemical synaptic transmission, postsynaptic	111	-0.490078	-1.94409	sva	1.06771e-05	0.00207206	0.00185406
GO:0051953	negative regulation of amine transport	21	-0.772058	-2.19627	sva	1.15162e-05	0.00216281	0.00193526
GO:0007194	negative regulation of adenylate cyclase activity	21	-0.763772	-2.1727	sva	1.34355e-05	0.00244442	0.00218725
GO:0098815	modulation of excitatory postsynaptic potential	38	-0.653261	-2.13013	sva	1.49994e-05	0.00264626	0.00236785
GO:0010273	detoxification of copper ion	10	0.878871	2.09803	sva	1.62645e-05	0.00270548	0.00242084
GO:1990169	stress response to copper ion	10	0.878871	2.09803	sva	1.62645e-05	0.00270548	0.00242084
GO:0060359	response to ammonium ion	106	-0.483382	-1.90417	sva	1.78387e-05	0.00285533	0.00255493
GO:0045666	positive regulation of neuron differentiation	309	-0.367932	-1.66016	sva	1.81462e-05	0.00285533	0.00255493
GO:0007187	G-protein coupled receptor signaling pathway, coupled to cyclic nucleotide second messenger	189	-0.417599	-1.78295	sva	2.23195e-05	0.00339556	0.00303832
GO:0009914	hormone transport	284	-0.373535	-1.67072	sva	2.32734e-05	0.00339556	0.00303832
GO:0060079	excitatory postsynaptic potential	95	-0.49987	-1.93512	sva	2.33292e-05	0.00339556	0.00303832
GO:0030803	negative regulation of cyclic nucleotide biosynthetic process	24	-0.728162	-2.1405	sva	2.48061e-05	0.00352247	0.00315188
GO:0051965	positive regulation of synapse assembly	58	-0.567351	-2.01408	sva	2.5773e-05	0.00357263	0.00319676
GO:0050805	negative regulation of synaptic transmission	65	-0.552725	-2.00459	sva	2.74765e-05	0.00372018	0.00332879
GO:0046879	hormone secretion	274	-0.375054	-1.67127	sva	3.00219e-05	0.00397244	0.0035545
GO:0051963	regulation of synapse assembly	76	-0.520018	-1.93898	sva	3.08885e-05	0.00399629	0.00357584
GO:0070098	chemokine-mediated signaling pathway	60	-0.556495	-1.98831	sva	3.30896e-05	0.00418799	0.00374738
GO:0010544	negative regulation of platelet activation	14	-0.819631	-2.10545	sva	3.50127e-05	0.00433711	0.0038808
GO:0010975	regulation of neuron projection development	408	-0.339278	-1.5722	sva	3.69516e-05	0.00448192	0.00401038
GO:0009187	cyclic nucleotide metabolic process	124	-0.454507	-1.83318	sva	4.06582e-05	0.00483085	0.00432261
GO:0045471	response to ethanol	109	-0.471734	-1.86634	sva	4.27397e-05	0.00497661	0.00445303
GO:0030818	negative regulation of cAMP biosynthetic process	22	-0.729089	-2.09842	sva	4.59551e-05	0.00524609	0.00469415
GO:0051350	negative regulation of lyase activity	25	-0.709026	-2.10461	sva	4.95585e-05	0.00554865	0.00496488
GO:0044057	regulation of system process	446	-0.328011	-1.53185	sva	5.89179e-05	0.00647207	0.00579115
GO:0017156	calcium ion regulated exocytosis	103	-0.471061	-1.84725	sva	6.25323e-05	0.00674191	0.0060326
GO:0140029	exocytic process	72	-0.522356	-1.92954	sva	6.37507e-05	0.0067483	0.00603832
GO:0010976	positive regulation of neuron projection development	234	-0.38056	-1.66682	sva	6.58367e-05	0.00683287	0.00611399
GO:0044706	multi-multicellular organism process	192	-0.401221	-1.71635	sva	6.68969e-05	0.00683287	0.00611399
GO:0010720	positive regulation of cell development	443	-0.3269	-1.52579	sva	7.17054e-05	0.00719774	0.00644047
GO:0030800	negative regulation of cyclic nucleotide metabolic process	26	-0.693407	-2.07705	sva	7.80211e-05	0.00769896	0.00688896
GO:0060291	long-term synaptic potentiation	68	-0.525296	-1.92072	sva	8.03882e-05	0.00770843	0.00689743
GO:0008306	associative learning	62	-0.537283	-1.93153	sva	8.07651e-05	0.00770843	0.00689743
GO:0048588	developmental cell growth	186	-0.403493	-1.71932	sva	8.25e-05	0.00774702	0.00693196
GO:0042737	drug catabolic process	115	0.430263	1.77933	sva	9.39122e-05	0.00867868	0.00776561
GO:0006874	cellular calcium ion homeostasis	357	-0.340847	-1.55996	sva	0.000104222	0.00948097	0.00848349
GO:0098742	cell-cell adhesion via plasma-membrane adhesion molecules	199	-0.390255	-1.67689	sva	0.000111175	0.00995787	0.00891022
GO:0061687	detoxification of inorganic compound	12	0.811534	2.0402	sva	0.000114582	0.0100368	0.00898082
GO:0055074	calcium ion homeostasis	367	-0.336185	-1.54263	sva	0.000116939	0.0100368	0.00898082
GO:0044331	cell-cell adhesion mediated by cadherin	31	-0.647332	-2.01798	sva	0.000117228	0.0100368	0.00898082
GO:0060627	regulation of vesicle-mediated transport	428	-0.325386	-1.51422	sva	0.000123133	0.0103896	0.0092965
GO:0019233	sensory perception of pain	79	-0.498719	-1.87233	sva	0.000125077	0.0104028	0.00930836
GO:0006968	cellular defense response	41	-0.599897	-1.98763	sva	0.000127084	0.0104209	0.00932452
GO:0061564	axon development	467	-0.317419	-1.48828	sva	0.00013622	0.0110149	0.00985601
GO:0031346	positive regulation of cell projection organization	315	-0.346724	-1.56752	sva	0.000138358	0.0110345	0.0098736
GO:0046677	response to antibiotic	277	-0.357757	-1.59591	sva	0.000143374	0.01128	0.0100933
GO:0008015	blood circulation	454	-0.31849	-1.4896	sva	0.000147827	0.0114753	0.010268
GO:0001964	startle response	22	-0.706206	-2.03256	sva	0.000166587	0.0127615	0.0114188
GO:0003013	circulatory system process	458	-0.317128	-1.48437	sva	0.000171479	0.0128185	0.0114698
GO:0030815	negative regulation of cAMP metabolic process	24	-0.68857	-2.02412	sva	0.000171735	0.0128185	0.0114698
GO:0007409	axonogenesis	432	-0.321211	-1.49597	sva	0.000183723	0.0135397	0.0121152
GO:0009190	cyclic nucleotide biosynthetic process	86	-0.478613	-1.82286	sva	0.000196759	0.0142684	0.0127672
GO:0030072	peptide hormone secretion	220	-0.373742	-1.62526	sva	0.000198513	0.0142684	0.0127672
GO:0007188	adenylate cyclase-modulating G-protein coupled receptor signaling pathway	160	-0.405701	-1.69574	sva	0.000210209	0.0149249	0.0133546
GO:0033555	multicellular organismal response to stress	60	-0.528341	-1.88772	sva	0.000216921	0.0152158	0.013615
GO:0030802	regulation of cyclic nucleotide biosynthetic process	64	-0.517342	-1.87112	sva	0.000219934	0.0152435	0.0136397
GO:0007638	mechanosensory behavior	12	-0.806666	-1.98901	sva	0.00022493	0.0154064	0.0137855
GO:0035641	locomotory exploration behavior	13	-0.793941	-2.00039	sva	0.000228131	0.0154439	0.0138191
GO:0007616	long-term memory	33	-0.621812	-1.96605	sva	0.000241455	0.0161321	0.0144349
GO:0052652	cyclic purine nucleotide metabolic process	85	-0.478661	-1.81945	sva	0.000243838	0.0161321	0.0144349
GO:0099504	synaptic vesicle cycle	120	-0.435491	-1.74799	sva	0.000255057	0.0166848	0.0149294
GO:1990138	neuron projection extension	144	-0.411868	-1.69698	sva	0.000279974	0.0181112	0.0162057
GO:0030799	regulation of cyclic nucleotide metabolic process	86	-0.473347	-1.8028	sva	0.00028882	0.0184781	0.0165341
GO:0051480	regulation of cytosolic calcium ion concentration	272	-0.350913	-1.56246	sva	0.00030044	0.0190126	0.0170123
GO:0033604	negative regulation of catecholamine secretion	11	-0.814035	-1.96058	sva	0.000307914	0.0192761	0.0172481
GO:1904861	excitatory synapse assembly	11	-0.813488	-1.95926	sva	0.000313797	0.0194354	0.0173906
GO:0045761	regulation of adenylate cyclase activity	31	-0.627384	-1.95579	sva	0.000323322	0.0198146	0.0177299
GO:0003073	regulation of systemic arterial blood pressure	79	-0.480906	-1.80545	sva	0.000353479	0.0213796	0.0191302
GO:0098754	detoxification	101	0.428207	1.73471	sva	0.000356204	0.0213796	0.0191302
GO:0050769	positive regulation of neurogenesis	390	-0.32169	-1.48446	sva	0.000369688	0.0219625	0.0196518
GO:0051952	regulation of amine transport	68	-0.500445	-1.82985	sva	0.00037819	0.0219919	0.0196781
GO:0051705	multi-organism behavior	58	-0.524388	-1.86157	sva	0.000381072	0.0219919	0.0196781
GO:0046883	regulation of hormone secretion	234	-0.36136	-1.58272	sva	0.000381515	0.0219919	0.0196781
GO:0051289	protein homotetramerization	74	0.467247	1.79473	sva	0.000393065	0.022427	0.0200675
GO:0006939	smooth muscle contraction	88	-0.466743	-1.78426	sva	0.000396768	0.022427	0.0200675
GO:0043949	regulation of cAMP-mediated signaling	37	-0.591908	-1.91904	sva	0.000416664	0.0233252	0.0208712
GO:0030595	leukocyte chemotaxis	151	-0.400242	-1.65989	sva	0.000451785	0.0249763	0.0223485
GO:0051339	regulation of lyase activity	44	-0.562761	-1.89203	sva	0.000454738	0.0249763	0.0223485
GO:0031279	regulation of cyclase activity	44	-0.56218	-1.89007	sva	0.000464056	0.0250176	0.0223855
GO:0009410	response to xenobiotic stimulus	235	-0.358262	-1.56992	sva	0.000464084	0.0250176	0.0223855
GO:0006940	regulation of smooth muscle contraction	53	-0.530855	-1.85207	sva	0.000469945	0.0251011	0.0224602
GO:0017158	regulation of calcium ion-dependent exocytosis	67	-0.497533	-1.81415	sva	0.000493874	0.0261394	0.0233893
GO:0034765	regulation of ion transmembrane transport	391	-0.317899	-1.46733	sva	0.000529438	0.0275451	0.0246471
GO:2000463	positive regulation of excitatory postsynaptic potential	25	-0.654098	-1.94157	sva	0.000529895	0.0275451	0.0246471
GO:0002886	regulation of myeloid leukocyte mediated immunity	39	-0.57744	-1.89286	sva	0.000539456	0.0277939	0.0248698
GO:0060271	cilium assembly	322	0.310147	1.46282	sva	0.000569184	0.0290399	0.0259847
GO:0031223	auditory behavior	10	-0.817008	-1.91742	sva	0.000576616	0.0290399	0.0259847
GO:0007585	respiratory gaseous exchange	56	-0.519685	-1.83262	sva	0.000579092	0.0290399	0.0259847
GO:0007189	adenylate cyclase-activating G-protein coupled receptor signaling pathway	84	-0.463696	-1.75911	sva	0.000583592	0.0290399	0.0259847
GO:1900271	regulation of long-term synaptic potentiation	30	-0.619643	-1.91752	sva	0.000588836	0.0290525	0.025996
GO:1903524	positive regulation of blood circulation	61	-0.506395	-1.81508	sva	0.000622635	0.0303898	0.0271926
GO:0007269	neurotransmitter secretion	128	-0.412551	-1.67154	sva	0.000631599	0.0303898	0.0271926
GO:0099643	signal release from synapse	128	-0.412551	-1.67154	sva	0.000631599	0.0303898	0.0271926
GO:0050433	regulation of catecholamine secretion	40	-0.569494	-1.87708	sva	0.000660621	0.0315257	0.0282089
GO:0007626	locomotory behavior	163	-0.387643	-1.6242	sva	0.000669751	0.0315775	0.0282553
GO:0016079	synaptic vesicle exocytosis	78	-0.471082	-1.76464	sva	0.000674841	0.0315775	0.0282553
GO:0032355	response to estradiol	112	-0.426197	-1.69291	sva	0.000689999	0.0315775	0.0282553
GO:0042391	regulation of membrane potential	389	-0.315672	-1.45637	sva	0.000694298	0.0315775	0.0282553
GO:0043950	positive regulation of cAMP-mediated signaling	19	-0.697703	-1.93677	sva	0.000697147	0.0315775	0.0282553
GO:0006171	cAMP biosynthetic process	57	-0.513196	-1.81579	sva	0.000698255	0.0315775	0.0282553
GO:0006163	purine nucleotide metabolic process	461	-0.304698	-1.42705	sva	0.000704355	0.0315775	0.0282553
GO:0097479	synaptic vesicle localization	114	-0.4241	-1.68924	sva	0.000705097	0.0315775	0.0282553
GO:0006816	calcium ion transport	357	-0.320612	-1.46735	sva	0.0007149	0.0316536	0.0283234
GO:0060326	cell chemotaxis	208	-0.363353	-1.56966	sva	0.000719418	0.0316536	0.0283234
GO:1903307	positive regulation of regulated secretory pathway	44	-0.551811	-1.85521	sva	0.000723108	0.0316536	0.0283234
GO:0007158	neuron cell-cell adhesion	15	-0.739108	-1.93298	sva	0.000739596	0.0321338	0.028753
GO:0042220	response to cocaine	43	-0.5548	-1.85649	sva	0.0007703	0.0330768	0.0295968
GO:0070838	divalent metal ion transport	393	-0.313614	-1.44825	sva	0.000772663	0.0330768	0.0295968
GO:0046068	cGMP metabolic process	46	-0.542967	-1.84151	sva	0.000785571	0.0332154	0.0297209
GO:0015837	amine transport	73	-0.476512	-1.76458	sva	0.000788051	0.0332154	0.0297209
GO:0030817	regulation of cAMP biosynthetic process	46	-0.54259	-1.84023	sva	0.000793017	0.0332154	0.0297209
GO:0060512	prostate gland morphogenesis	21	0.661203	1.92952	sva	0.000803766	0.0334252	0.0299086
GO:0044782	cilium organization	331	0.304263	1.43893	sva	0.000827832	0.0341818	0.0305856
GO:0060996	dendritic spine development	83	-0.458224	-1.73468	sva	0.000850006	0.0348503	0.0311837
GO:0072503	cellular divalent inorganic cation homeostasis	386	-0.312826	-1.44223	sva	0.000912857	0.0371654	0.0332553
GO:0030850	prostate gland development	41	0.53719	1.83482	sva	0.000933488	0.0377414	0.0337707
GO:0097106	postsynaptic density organization	14	-0.744601	-1.91272	sva	0.000953124	0.0378167	0.0338381
GO:0099084	postsynaptic specialization organization	14	-0.744601	-1.91272	sva	0.000953124	0.0378167	0.0338381
GO:0097529	myeloid leukocyte migration	128	-0.405219	-1.64183	sva	0.00095622	0.0378167	0.0338381
GO:0016358	dendrite development	195	-0.364907	-1.5641	sva	0.000962672	0.0378167	0.0338381
GO:0042753	positive regulation of circadian rhythm	16	-0.720369	-1.91526	sva	0.000974474	0.0378167	0.0338381
GO:0050900	leukocyte migration	327	-0.323389	-1.46744	sva	0.000980312	0.0378167	0.0338381
GO:0060998	regulation of dendritic spine development	62	-0.49321	-1.77309	sva	0.000985701	0.0378167	0.0338381
GO:0072523	purine-containing compound catabolic process	48	-0.531229	-1.81715	sva	0.000987314	0.0378167	0.0338381
GO:0030808	regulation of nucleotide biosynthetic process	129	-0.40422	-1.63952	sva	0.00100175	0.0378713	0.0338869
GO:1900371	regulation of purine nucleotide biosynthetic process	129	-0.40422	-1.63952	sva	0.00100175	0.0378713	0.0338869
GO:0072511	divalent inorganic cation transport	397	-0.30979	-1.43194	sva	0.00103917	0.0390087	0.0349046
GO:1990266	neutrophil migration	67	-0.482658	-1.75991	sva	0.00104628	0.0390087	0.0349046
GO:0050432	catecholamine secretion	43	-0.546494	-1.82869	sva	0.00105193	0.0390087	0.0349046
GO:0030593	neutrophil chemotaxis	59	-0.499436	-1.779	sva	0.00105925	0.0390312	0.0349248
GO:1903532	positive regulation of secretion by cell	314	-0.325582	-1.47147	sva	0.00108067	0.0395701	0.0354069
GO:0045576	mast cell activation	48	-0.52895	-1.80936	sva	0.00108958	0.039647	0.0354758
GO:0006972	hyperosmotic response	18	0.677977	1.90106	sva	0.00112316	0.0406151	0.036342
GO:0097501	stress response to metal ion	12	0.752583	1.892	sva	0.00122972	0.04394	0.0393172
GO:0007620	copulation	16	-0.713183	-1.89615	sva	0.0012302	0.04394	0.0393172
GO:0015874	norepinephrine transport	19	-0.682635	-1.89494	sva	0.00125756	0.0446434	0.0399465
GO:0050905	neuromuscular process	85	-0.446899	-1.69872	sva	0.00128963	0.0453172	0.0405494
GO:0006195	purine nucleotide catabolic process	42	-0.546463	-1.81983	sva	0.00129211	0.0453172	0.0405494
GO:1900543	negative regulation of purine nucleotide metabolic process	45	-0.533381	-1.80109	sva	0.00136196	0.0474812	0.0424857
GO:0050865	regulation of cell activation	434	-0.302198	-1.40805	sva	0.00137148	0.0475283	0.0425279
GO:0072507	divalent inorganic cation homeostasis	401	-0.306004	-1.41574	sva	0.00143097	0.0492966	0.0441101
GO:0099531	presynaptic process involved in chemical synaptic transmission	137	-0.391192	-1.60056	sva	0.0014625	0.0498417	0.0445979
GO:0021761	limbic system development	93	-0.434024	-1.6744	sva	0.00146408	0.0498417	0.0445979
GO:0007567	parturition	14	-0.734288	-1.88622	sva	0.00147248	0.0498417	0.0445979
GO:0016339	calcium-dependent cell-cell adhesion via plasma membrane cell adhesion molecules	41	-0.546363	-1.81026	sva	0.00149324	0.0502522	0.0449652
GO:0032102	negative regulation of response to external stimulus	248	-0.338835	-1.49352	sva	0.00152666	0.0510785	0.0457046
GO:0099173	postsynapse organization	94	-0.431332	-1.6669	sva	0.00153534	0.0510785	0.0457046
GO:0032925	regulation of activin receptor signaling pathway	19	-0.676515	-1.87795	sva	0.00154836	0.0512191	0.0458304
GO:0050795	regulation of behavior	58	-0.49336	-1.75142	sva	0.00157215	0.0514289	0.0460181
GO:0048243	norepinephrine secretion	15	-0.718372	-1.87875	sva	0.00157237	0.0514289	0.0460181
GO:0099054	presynapse assembly	17	-0.694773	-1.876	sva	0.00158616	0.0515902	0.0461625
GO:0007565	female pregnancy	167	-0.371946	-1.56315	sva	0.00161552	0.0522531	0.0467556
GO:1900542	regulation of purine nucleotide metabolic process	166	-0.372306	-1.56343	sva	0.0016541	0.0532053	0.0476077
GO:0002861	regulation of inflammatory response to antigenic stimulus	19	-0.673527	-1.86966	sva	0.00169087	0.0539568	0.0482801
GO:0097305	response to alcohol	164	-0.372581	-1.5623	sva	0.001696	0.0539568	0.0482801
GO:0002703	regulation of leukocyte mediated immunity	141	-0.386171	-1.5863	sva	0.00174758	0.0543091	0.0485953
GO:0030809	negative regulation of nucleotide biosynthetic process	38	-0.553922	-1.80621	sva	0.00175118	0.0543091	0.0485953
GO:1900372	negative regulation of purine nucleotide biosynthetic process	38	-0.553922	-1.80621	sva	0.00175118	0.0543091	0.0485953
GO:0043062	extracellular structure organization	338	0.2956	1.40115	sva	0.00177412	0.0543091	0.0485953
GO:0006875	cellular metal ion homeostasis	464	-0.295362	-1.38404	sva	0.00177905	0.0543091	0.0485953
GO:0046717	acid secretion	102	-0.419617	-1.6431	sva	0.00178013	0.0543091	0.0485953
GO:0042481	regulation of odontogenesis	21	0.639094	1.865	sva	0.0017829	0.0543091	0.0485953
GO:0043279	response to alkaloid	98	-0.424206	-1.65053	sva	0.00178909	0.0543091	0.0485953
GO:1903522	regulation of blood circulation	251	-0.33596	-1.4827	sva	0.0017913	0.0543091	0.0485953
GO:0046058	cAMP metabolic process	87	-0.437301	-1.66876	sva	0.00180035	0.0543091	0.0485953
GO:0010543	regulation of platelet activation	25	-0.62273	-1.84846	sva	0.00182032	0.0546285	0.0488811
GO:0033003	regulation of mast cell activation	34	-0.570436	-1.81569	sva	0.00183153	0.0546571	0.0489067
GO:0002862	negative regulation of inflammatory response to antigenic stimulus	10	-0.787317	-1.84774	sva	0.00184005	0.0546571	0.0489067
GO:0060740	prostate gland epithelium morphogenesis	20	0.646008	1.86225	sva	0.00187305	0.0553548	0.049531
GO:0106027	neuron projection organization	70	-0.463505	-1.70377	sva	0.00189713	0.055627	0.0497745
GO:0030195	negative regulation of blood coagulation	36	-0.560036	-1.80527	sva	0.00191214	0.055627	0.0497745
GO:1900047	negative regulation of hemostasis	36	-0.560036	-1.80527	sva	0.00191214	0.055627	0.0497745
GO:0034762	regulation of transmembrane transport	463	-0.294947	-1.38186	sva	0.00192048	0.055627	0.0497745
GO:0007622	rhythmic behavior	40	-0.542961	-1.78963	sva	0.0019332	0.0556528	0.0497976
GO:0002279	mast cell activation involved in immune response	40	-0.542795	-1.78908	sva	0.00195005	0.0556528	0.0497976
GO:0043303	mast cell degranulation	40	-0.542795	-1.78908	sva	0.00195005	0.0556528	0.0497976
GO:0035930	corticosteroid hormone secretion	13	-0.738871	-1.86164	sva	0.00198104	0.055762	0.0498953
GO:2000846	regulation of corticosteroid hormone secretion	13	-0.738871	-1.86164	sva	0.00198104	0.055762	0.0498953
GO:0017001	antibiotic catabolic process	40	0.523235	1.77761	sva	0.00198644	0.055762	0.0498953
GO:0001963	synaptic transmission, dopaminergic	27	-0.606469	-1.83242	sva	0.00199218	0.055762	0.0498953
GO:0043300	regulation of leukocyte degranulation	37	-0.554687	-1.79836	sva	0.002012	0.0558001	0.0499295
GO:0097530	granulocyte migration	86	-0.436302	-1.66171	sva	0.00201272	0.0558001	0.0499295
GO:0009150	purine ribonucleotide metabolic process	446	-0.296719	-1.38571	sva	0.00202391	0.0558445	0.0499692
GO:0098693	regulation of synaptic vesicle cycle	41	-0.538657	-1.78472	sva	0.00204643	0.0561995	0.0502868
GO:2000311	regulation of AMPA receptor activity	22	-0.640939	-1.84471	sva	0.00208138	0.0568911	0.0509057
GO:0014061	regulation of norepinephrine secretion	14	-0.723373	-1.85819	sva	0.00212021	0.0576817	0.0516131
GO:0009259	ribonucleotide metabolic process	460	-0.294072	-1.37697	sva	0.00215366	0.0577691	0.0516913
GO:0036159	inner dynein arm assembly	16	0.682677	1.85601	sva	0.00215367	0.0577691	0.0516913
GO:0050728	negative regulation of inflammatory response	99	-0.419494	-1.63469	sva	0.00215381	0.0577691	0.0516913
GO:0045823	positive regulation of heart contraction	32	-0.575937	-1.80853	sva	0.00216727	0.0577691	0.0516913
GO:0014047	glutamate secretion	38	-0.548588	-1.78882	sva	0.00217304	0.0577691	0.0516913
GO:0050886	endocrine process	73	-0.454582	-1.68338	sva	0.00221309	0.0585665	0.0524048
GO:0048489	synaptic vesicle transport	107	-0.410407	-1.61912	sva	0.00229146	0.0600939	0.0537715
GO:0097480	establishment of synaptic vesicle localization	107	-0.410407	-1.61912	sva	0.00229146	0.0600939	0.0537715
GO:0099601	regulation of neurotransmitter receptor activity	41	-0.535025	-1.77269	sva	0.00232489	0.0606974	0.0543115
GO:0042445	hormone metabolic process	179	-0.359337	-1.524	sva	0.00235405	0.0610405	0.0546185
GO:0007568	aging	255	-0.330984	-1.46346	sva	0.00236544	0.0610405	0.0546185
GO:0060986	endocrine hormone secretion	42	-0.531014	-1.76838	sva	0.00236949	0.0610405	0.0546185
GO:0044060	regulation of endocrine process	40	-0.538168	-1.77383	sva	0.00239545	0.0611269	0.0546958
GO:0071621	granulocyte chemotaxis	76	-0.447687	-1.66928	sva	0.00240204	0.0611269	0.0546958
GO:0062012	regulation of small molecule metabolic process	418	-0.298547	-1.38637	sva	0.00240434	0.0611269	0.0546958
GO:0099068	postsynapse assembly	16	-0.693393	-1.84354	sva	0.00241778	0.0612014	0.0547624
GO:0006140	regulation of nucleotide metabolic process	172	-0.362578	-1.52977	sva	0.00243362	0.0613358	0.0548827
GO:0006904	vesicle docking involved in exocytosis	46	-0.516101	-1.75039	sva	0.00247213	0.0620376	0.0555107
GO:0045921	positive regulation of exocytosis	74	-0.449515	-1.66841	sva	0.00258143	0.0642576	0.0574971
GO:0019693	ribose phosphate metabolic process	476	-0.29029	-1.36316	sva	0.00259037	0.0642576	0.0574971
GO:1901570	fatty acid derivative biosynthetic process	75	-0.447877	-1.66624	sva	0.0025937	0.0642576	0.0574971
GO:0034104	negative regulation of tissue remodeling	18	0.654995	1.83662	sva	0.00260963	0.0643783	0.0576051
GO:1903792	negative regulation of anion transport	20	-0.65095	-1.82967	sva	0.00263443	0.064634	0.0578339
GO:0051051	negative regulation of transport	387	-0.30192	-1.39231	sva	0.0026422	0.064634	0.0578339
GO:0045980	negative regulation of nucleotide metabolic process	46	-0.51431	-1.74431	sva	0.00266201	0.064846	0.0580236
GO:0051968	positive regulation of synaptic transmission, glutamatergic	28	-0.5916	-1.80201	sva	0.00270887	0.0657128	0.0587992
GO:0050819	negative regulation of coagulation	39	-0.537997	-1.76356	sva	0.00273849	0.0661555	0.0591954
GO:0097050	type B pancreatic cell apoptotic process	11	0.743827	1.82503	sva	0.00275442	0.0662325	0.0592642
GO:0035640	exploration behavior	22	-0.632174	-1.81949	sva	0.00278411	0.0662325	0.0592642
GO:0071276	cellular response to cadmium ion	29	0.567891	1.79314	sva	0.00278971	0.0662325	0.0592642
GO:0016999	antibiotic metabolic process	118	0.37564	1.55971	sva	0.00279382	0.0662325	0.0592642
GO:0035902	response to immobilization stress	23	-0.624185	-1.81602	sva	0.00279856	0.0662325	0.0592642
GO:0032103	positive regulation of response to external stimulus	223	-0.338744	-1.47537	sva	0.00282072	0.0664867	0.0594917
GO:0050680	negative regulation of epithelial cell proliferation	112	0.380816	1.56868	sva	0.00290393	0.0679682	0.0608173
GO:0045933	positive regulation of muscle contraction	47	-0.508544	-1.73203	sva	0.00290692	0.0679682	0.0608173
GO:0003085	negative regulation of systemic arterial blood pressure	12	-0.741142	-1.82745	sva	0.00299254	0.0696903	0.0623583
GO:0099175	regulation of postsynapse organization	53	-0.489639	-1.70828	sva	0.00307869	0.0711977	0.0637071
GO:0032409	regulation of transporter activity	225	-0.336722	-1.46801	sva	0.00309311	0.0711977	0.0637071
GO:1904338	regulation of dopaminergic neuron differentiation	10	0.758161	1.80987	sva	0.00310652	0.0711977	0.0637071
GO:0051648	vesicle localization	238	-0.332218	-1.45777	sva	0.0031167	0.0711977	0.0637071
GO:0002237	response to molecule of bacterial origin	291	-0.318035	-1.42613	sva	0.00311842	0.0711977	0.0637071
GO:0072521	purine-containing compound metabolic process	490	-0.286971	-1.35083	sva	0.00314255	0.0713564	0.0638491
GO:0046456	icosanoid biosynthetic process	38	-0.538502	-1.75593	sva	0.00314988	0.0713564	0.0638491
GO:0046847	filopodium assembly	51	-0.494159	-1.71109	sva	0.00318185	0.0717509	0.064202
GO:0048642	negative regulation of skeletal muscle tissue development	12	0.722601	1.81662	sva	0.00319194	0.0717509	0.064202
GO:0007193	adenylate cyclase-inhibiting G-protein coupled receptor signaling pathway	68	-0.455338	-1.66492	sva	0.0032338	0.0724122	0.0647938
GO:0035773	insulin secretion involved in cellular response to glucose stimulus	53	-0.48771	-1.70154	sva	0.00333587	0.0744116	0.0665828
GO:0034368	protein-lipid complex remodeling	22	0.61213	1.80709	sva	0.00336157	0.0744147	0.0665856
GO:0034369	plasma lipoprotein particle remodeling	22	0.61213	1.80709	sva	0.00336157	0.0744147	0.0665856
GO:0097061	dendritic spine organization	67	-0.45599	-1.66267	sva	0.00343883	0.0758366	0.0678579
GO:0050727	regulation of inflammatory response	266	-0.322765	-1.4337	sva	0.00350958	0.0771048	0.0689927
GO:0007216	G-protein coupled glutamate receptor signaling pathway	14	-0.706344	-1.81444	sva	0.00354795	0.0774905	0.0693378
GO:0035929	steroid hormone secretion	18	-0.660545	-1.80901	sva	0.00355375	0.0774905	0.0693378
GO:0051491	positive regulation of filopodium assembly	28	-0.583326	-1.77681	sva	0.0035903	0.0779953	0.0697895
GO:2000831	regulation of steroid hormone secretion	16	-0.680278	-1.80867	sva	0.00367123	0.0794568	0.0710973
GO:0016054	organic acid catabolic process	230	0.312789	1.42142	sva	0.00375173	0.0805999	0.0721201
GO:0046395	carboxylic acid catabolic process	230	0.312789	1.42142	sva	0.00375173	0.0805999	0.0721201
GO:0031650	regulation of heat generation	10	-0.765164	-1.79575	sva	0.00378835	0.0810874	0.0725563
GO:0030278	regulation of ossification	159	0.342686	1.48561	sva	0.00380311	0.081105	0.0725721
GO:0010460	positive regulation of heart rate	20	-0.63966	-1.79793	sva	0.00393818	0.0835557	0.0747649
GO:0045744	negative regulation of G-protein coupled receptor protein signaling pathway	38	-0.532385	-1.73598	sva	0.00394672	0.0835557	0.0747649
GO:0034367	protein-containing complex remodeling	23	0.597648	1.78403	sva	0.00399895	0.08392	0.0750909
GO:0090257	regulation of muscle system process	190	-0.345961	-1.47801	sva	0.00400652	0.08392	0.0750909
GO:0051151	negative regulation of smooth muscle cell differentiation	11	0.731938	1.79586	sva	0.00400717	0.08392	0.0750909
GO:0070588	calcium ion transmembrane transport	269	-0.31996	-1.42282	sva	0.00408783	0.0853022	0.0763277
GO:0007156	homophilic cell adhesion via plasma membrane adhesion molecules	132	-0.377241	-1.53525	sva	0.00413536	0.0859859	0.0769395
GO:0006836	neurotransmitter transport	217	-0.335302	-1.45575	sva	0.00416975	0.0862072	0.0771374
GO:1900449	regulation of glutamate receptor signaling pathway	39	-0.527156	-1.72802	sva	0.00418079	0.0862072	0.0771374
GO:0050857	positive regulation of antigen receptor-mediated signaling pathway	18	-0.654725	-1.79307	sva	0.00419042	0.0862072	0.0771374
GO:0046661	male sex differentiation	135	0.355529	1.50585	sva	0.00429694	0.0880415	0.0787788
GO:0051668	localization within membrane	106	-0.398309	-1.56905	sva	0.00430983	0.0880415	0.0787788
GO:0046627	negative regulation of insulin receptor signaling pathway	27	-0.582959	-1.76138	sva	0.00441778	0.0899312	0.0804696
GO:0051489	regulation of filopodium assembly	38	-0.528657	-1.72383	sva	0.0044642	0.0904298	0.0809157
GO:0090276	regulation of peptide hormone secretion	183	-0.347557	-1.47796	sva	0.00447334	0.0904298	0.0809157
GO:0048512	circadian behavior	39	-0.524646	-1.7198	sva	0.00451982	0.0910532	0.0814736
GO:0099003	vesicle-mediated transport in synapse	125	-0.381021	-1.53868	sva	0.00453882	0.0911208	0.0815341
GO:0072224	metanephric glomerulus development	12	-0.726316	-1.79089	sva	0.00461399	0.0923115	0.0825995
GO:0048168	regulation of neuronal synaptic plasticity	48	-0.49241	-1.68437	sva	0.0047432	0.0945715	0.0846218
GO:0001821	histamine secretion	10	-0.757586	-1.77797	sva	0.00478217	0.0950233	0.085026
GO:0051047	positive regulation of secretion	339	-0.302751	-1.37856	sva	0.00490224	0.0970777	0.0868643
GO:0002448	mast cell mediated immunity	42	-0.510617	-1.70045	sva	0.00494997	0.0974055	0.0871576
GO:0007157	heterophilic cell-cell adhesion via plasma membrane cell adhesion molecules	45	-0.500124	-1.68879	sva	0.00495226	0.0974055	0.0871576
GO:0030814	regulation of cAMP metabolic process	64	-0.453429	-1.63996	sva	0.00499433	0.0978958	0.0875963
GO:0050773	regulation of dendrite development	120	-0.382533	-1.53542	sva	0.00501081	0.0978958	0.0875963
GO:2000273	positive regulation of signaling receptor activity	28	-0.572458	-1.74371	sva	0.00508721	0.099056	0.0886344
GO:1901606	alpha-amino acid catabolic process	90	0.392786	1.56127	sva	0.0051438	0.099824	0.0893216
GO:0002699	positive regulation of immune effector process	146	-0.3638	-1.50162	sva	0.00519362	0.100297	0.0897448
GO:0002548	monocyte chemotaxis	40	-0.515855	-1.70028	sva	0.00520262	0.100297	0.0897448
GO:0050777	negative regulation of immune response	112	-0.388656	-1.5438	sva	0.00524968	0.10087	0.0902577
GO:0021513	spinal cord dorsal/ventral patterning	22	0.595999	1.75947	sva	0.00534167	0.102169	0.0914203
GO:0030823	regulation of cGMP metabolic process	24	-0.595938	-1.75182	sva	0.0053524	0.102169	0.0914203
GO:0010575	positive regulation of vascular endothelial growth factor production	23	-0.602917	-1.75414	sva	0.00541551	0.102908	0.0920813
GO:0046851	negative regulation of bone remodeling	13	0.690738	1.77511	sva	0.0054358	0.102908	0.0920813
GO:0046626	regulation of insulin receptor signaling pathway	45	-0.497324	-1.67933	sva	0.00544413	0.102908	0.0920813
GO:0048520	positive regulation of behavior	21	-0.618571	-1.75965	sva	0.00549513	0.103536	0.0926431
GO:0007320	insemination	10	-0.752305	-1.76557	sva	0.00558314	0.104855	0.0938233
GO:0048148	behavioral response to cocaine	17	-0.654894	-1.76832	sva	0.00560277	0.104885	0.0938504
GO:0051650	establishment of vesicle localization	227	-0.326757	-1.42611	sva	0.00571186	0.106058	0.0949001
GO:0009074	aromatic amino acid family catabolic process	17	0.639556	1.76629	sva	0.00571722	0.106058	0.0949001
GO:0030900	forebrain development	332	-0.302123	-1.37308	sva	0.00572008	0.106058	0.0949001
GO:0061178	regulation of insulin secretion involved in cellular response to glucose stimulus	46	-0.492174	-1.66924	sva	0.00585827	0.108276	0.0968842
GO:0051937	catecholamine transport	54	-0.469792	-1.64524	sva	0.00594231	0.108933	0.0974723
GO:0072677	eosinophil migration	17	-0.652716	-1.76244	sva	0.00595439	0.108933	0.0974723
GO:0050920	regulation of chemotaxis	165	-0.350819	-1.47203	sva	0.00596137	0.108933	0.0974723
GO:0032496	response to lipopolysaccharide	278	-0.312584	-1.39495	sva	0.00596868	0.108933	0.0974723
GO:0006730	one-carbon metabolic process	31	0.533418	1.7111	sva	0.0059985	0.109135	0.0976532
GO:0030335	positive regulation of cell migration	390	-0.292182	-1.3483	sva	0.00602155	0.109213	0.097723
GO:0002067	glandular epithelial cell differentiation	37	0.504631	1.68514	sva	0.00607022	0.109635	0.0981008
GO:0042596	fear response	34	-0.535519	-1.70455	sva	0.00608249	0.109635	0.0981008
GO:0072273	metanephric nephron morphogenesis	22	0.591095	1.74499	sva	0.00611404	0.109864	0.0983053
GO:0002790	peptide secretion	492	-0.279807	-1.31754	sva	0.00613592	0.109873	0.0983135
GO:0019371	cyclooxygenase pathway	11	-0.73131	-1.76134	sva	0.00617593	0.109873	0.0983135
GO:0030166	proteoglycan biosynthetic process	57	-0.461596	-1.63322	sva	0.00618665	0.109873	0.0983135
GO:0002694	regulation of leukocyte activation	404	-0.289854	-1.34194	sva	0.00619003	0.109873	0.0983135
GO:0032924	activin receptor signaling pathway	33	-0.539494	-1.70578	sva	0.00625709	0.110726	0.0990764
GO:1900077	negative regulation of cellular response to insulin stimulus	28	-0.564254	-1.71872	sva	0.00637706	0.112507	0.10067
GO:0015669	gas transport	17	0.635151	1.75413	sva	0.00645312	0.113225	0.101313
GO:0048172	regulation of short-term neuronal synaptic plasticity	14	-0.685	-1.75961	sva	0.00645985	0.113225	0.101313
GO:1904645	response to amyloid-beta	26	-0.576763	-1.72765	sva	0.00649478	0.113225	0.101313
GO:0001662	behavioral fear response	32	-0.54286	-1.70466	sva	0.00651503	0.113225	0.101313
GO:0002209	behavioral defense response	32	-0.54286	-1.70466	sva	0.00651503	0.113225	0.101313
GO:0060442	branching involved in prostate gland morphogenesis	10	0.732012	1.74745	sva	0.00661152	0.11456	0.102508
GO:0046887	positive regulation of hormone secretion	115	-0.381081	-1.52005	sva	0.00666283	0.115107	0.102997
GO:0010573	vascular endothelial growth factor production	29	-0.557325	-1.71184	sva	0.00671593	0.115681	0.10351
GO:0051608	histamine transport	11	-0.727808	-1.7529	sva	0.00681137	0.116888	0.104591
GO:1904062	regulation of cation transmembrane transport	263	-0.314162	-1.39367	sva	0.00682618	0.116888	0.104591
GO:0097028	dendritic cell differentiation	36	-0.522624	-1.68467	sva	0.0069761	0.119105	0.106574
GO:0042749	regulation of circadian sleep/wake cycle	19	-0.627744	-1.74257	sva	0.00700229	0.119203	0.106661
GO:0010959	regulation of metal ion transport	313	-0.303135	-1.36965	sva	0.00702993	0.119243	0.106697
GO:0008277	regulation of G-protein coupled receptor protein signaling pathway	118	-0.377449	-1.51129	sva	0.00704561	0.119243	0.106697
GO:0006833	water transport	17	0.63189	1.74512	sva	0.0070833	0.119533	0.106957
GO:0051932	synaptic transmission, GABAergic	42	-0.499275	-1.66268	sva	0.00716634	0.120585	0.107898
GO:0010517	regulation of phospholipase activity	50	-0.474486	-1.63672	sva	0.00726159	0.121491	0.108709
GO:0015701	bicarbonate transport	39	0.491562	1.66083	sva	0.00726191	0.121491	0.108709
GO:0019882	antigen processing and presentation	189	-0.33648	-1.43661	sva	0.00728817	0.121581	0.108789
GO:0071560	cellular response to transforming growth factor beta stimulus	197	-0.33302	-1.42927	sva	0.00733733	0.122051	0.10921
GO:0009063	cellular amino acid catabolic process	104	0.369875	1.50559	sva	0.00735971	0.122075	0.109231
GO:0071280	cellular response to copper ion	17	0.629362	1.73814	sva	0.00756008	0.12488	0.111742
GO:0071559	response to transforming growth factor beta	200	-0.331326	-1.42453	sva	0.00757175	0.12488	0.111742
GO:0071825	protein-lipid complex subunit organization	38	0.49323	1.65666	sva	0.00787103	0.129169	0.115579
GO:0071827	plasma lipoprotein particle organization	36	0.500484	1.66087	sva	0.00787617	0.129169	0.115579
GO:0002688	regulation of leukocyte chemotaxis	84	-0.408956	-1.55145	sva	0.00792276	0.129568	0.115936
GO:0002710	negative regulation of T cell mediated immunity	14	-0.677555	-1.74049	sva	0.00799651	0.130408	0.116688
GO:0090659	walking behavior	25	0.558649	1.70224	sva	0.00802533	0.130486	0.116758
GO:0035094	response to nicotine	37	-0.514	-1.66645	sva	0.00804613	0.130486	0.116758
GO:0071636	positive regulation of transforming growth factor beta production	16	-0.65247	-1.73473	sva	0.00806895	0.130493	0.116764
GO:0046688	response to copper ion	29	0.534058	1.68631	sva	0.00818288	0.131969	0.118084
GO:0048278	vesicle docking	63	-0.441673	-1.59259	sva	0.00826802	0.13269	0.11873
GO:0045956	positive regulation of calcium ion-dependent exocytosis	22	-0.595748	-1.71465	sva	0.00827575	0.13269	0.11873
GO:0070849	response to epidermal growth factor	42	0.47727	1.63876	sva	0.00829596	0.13269	0.11873
GO:0007204	positive regulation of cytosolic calcium ion concentration	245	-0.315942	-1.39068	sva	0.00840118	0.134005	0.119906
GO:2000147	positive regulation of cell motility	403	-0.286167	-1.32457	sva	0.008519	0.135466	0.121214
GO:0090280	positive regulation of calcium ion import	15	-0.662458	-1.73252	sva	0.00853933	0.135466	0.121214
GO:0090330	regulation of platelet aggregation	15	-0.662273	-1.73204	sva	0.00857815	0.135712	0.121434
GO:0048265	response to pain	23	-0.586647	-1.70681	sva	0.00864991	0.136476	0.122118
GO:0006067	ethanol metabolic process	14	0.659898	1.73075	sva	0.00872187	0.136903	0.122499
GO:0090023	positive regulation of neutrophil chemotaxis	19	-0.619448	-1.71954	sva	0.00872397	0.136903	0.122499
GO:0002690	positive regulation of leukocyte chemotaxis	68	-0.430617	-1.57453	sva	0.00879885	0.137707	0.123219
GO:0048245	eosinophil chemotaxis	14	-0.673191	-1.72928	sva	0.00899243	0.140359	0.125592
GO:0007618	mating	32	-0.531966	-1.67045	sva	0.00909009	0.141304	0.126438
GO:0035455	response to interferon-alpha	18	0.611765	1.7154	sva	0.00910153	0.141304	0.126438
GO:0016486	peptide hormone processing	32	-0.531767	-1.66983	sva	0.00914861	0.141657	0.126754
GO:1902275	regulation of chromatin organization	153	0.330866	1.42695	sva	0.00917562	0.141699	0.126791
GO:0071674	mononuclear cell migration	53	-0.45949	-1.60309	sva	0.00929529	0.143005	0.12796
GO:0060560	developmental growth involved in morphogenesis	204	-0.326681	-1.40787	sva	0.00933069	0.143005	0.12796
GO:0051924	regulation of calcium ion transport	198	-0.328599	-1.41117	sva	0.0093339	0.143005	0.12796
GO:0030031	cell projection assembly	496	0.257848	1.26534	sva	0.00938723	0.143445	0.128353
GO:0060134	prepulse inhibition	12	-0.699639	-1.72511	sva	0.0094979	0.143908	0.128768
GO:0036499	PERK-mediated unfolded protein response	21	-0.598646	-1.70297	sva	0.00950659	0.143908	0.128768
GO:0032412	regulation of ion transmembrane transporter activity	208	-0.324986	-1.40392	sva	0.00950928	0.143908	0.128768
GO:0001516	prostaglandin biosynthetic process	21	-0.598499	-1.70255	sva	0.00954114	0.143908	0.128768
GO:0046457	prostanoid biosynthetic process	21	-0.598499	-1.70255	sva	0.00954114	0.143908	0.128768
GO:0006813	potassium ion transport	202	-0.326873	-1.40699	sva	0.00964582	0.145111	0.129844
GO:0040017	positive regulation of locomotion	428	-0.281363	-1.30936	sva	0.00978668	0.146294	0.130903
GO:0061045	negative regulation of wound healing	53	-0.457919	-1.59761	sva	0.00982999	0.146294	0.130903
GO:0070050	neuron cellular homeostasis	10	-0.730979	-1.71552	sva	0.00983199	0.146294	0.130903
GO:0010744	positive regulation of macrophage derived foam cell differentiation	14	0.654742	1.71723	sva	0.00984966	0.146294	0.130903
GO:0098911	regulation of ventricular cardiac muscle cell action potential	14	0.654679	1.71706	sva	0.00985995	0.146294	0.130903
GO:0022410	circadian sleep/wake cycle process	23	-0.581799	-1.6927	sva	0.00987523	0.146294	0.130903
GO:2000674	regulation of type B pancreatic cell apoptotic process	10	0.715599	1.70827	sva	0.00995184	0.147055	0.131583
GO:0030801	positive regulation of cyclic nucleotide metabolic process	47	-0.473413	-1.61238	sva	0.00998439	0.147149	0.131668
GO:0003084	positive regulation of systemic arterial blood pressure	10	0.715372	1.70773	sva	0.0100088	0.147149	0.131668
GO:0030728	ovulation	18	-0.623548	-1.70769	sva	0.0100883	0.147944	0.132379
GO:0051930	regulation of sensory perception of pain	28	-0.548543	-1.67086	sva	0.0102048	0.148889	0.133225
GO:0051931	regulation of sensory perception	28	-0.548543	-1.67086	sva	0.0102048	0.148889	0.133225
GO:0061000	negative regulation of dendritic spine development	10	-0.729394	-1.7118	sva	0.0102551	0.148889	0.133225
GO:0070486	leukocyte aggregation	10	0.714367	1.70533	sva	0.0102792	0.148889	0.133225
GO:0035909	aorta morphogenesis	32	0.510443	1.64918	sva	0.0102806	0.148889	0.133225
GO:0001676	long-chain fatty acid metabolic process	79	-0.409151	-1.53606	sva	0.0103125	0.148946	0.133276
GO:0048708	astrocyte differentiation	63	0.416711	1.55323	sva	0.0103459	0.148946	0.133276
GO:0048846	axon extension involved in axon guidance	31	-0.532107	-1.65878	sva	0.0103898	0.148946	0.133276
GO:1902284	neuron projection extension involved in neuron projection guidance	31	-0.532107	-1.65878	sva	0.0103898	0.148946	0.133276
GO:0061512	protein localization to cilium	32	0.510048	1.6479	sva	0.0104124	0.148946	0.133276
GO:0070509	calcium ion import	66	-0.429412	-1.5615	sva	0.0104654	0.149338	0.133626
GO:0006029	proteoglycan metabolic process	78	-0.409904	-1.53548	sva	0.0105743	0.150124	0.13433
GO:0061036	positive regulation of cartilage development	24	0.555502	1.67586	sva	0.0106001	0.150124	0.13433
GO:0010257	NADH dehydrogenase complex assembly	53	-0.455483	-1.58911	sva	0.0106237	0.150124	0.13433
GO:0032981	mitochondrial respiratory chain complex I assembly	53	-0.455483	-1.58911	sva	0.0106237	0.150124	0.13433
GO:1901568	fatty acid derivative metabolic process	132	-0.358414	-1.45863	sva	0.0109308	0.15409	0.137878
GO:0001967	suckling behavior	10	-0.726274	-1.70448	sva	0.0110049	0.15476	0.138478
GO:0030307	positive regulation of cell growth	139	-0.353555	-1.44947	sva	0.0111212	0.155711	0.139329
GO:1903859	regulation of dendrite extension	19	-0.609727	-1.69255	sva	0.0111389	0.155711	0.139329
GO:0032368	regulation of lipid transport	88	-0.395904	-1.51346	sva	0.0111528	0.155711	0.139329
GO:0045920	negative regulation of exocytosis	25	-0.563818	-1.67359	sva	0.0112384	0.156342	0.139893
GO:0010574	regulation of vascular endothelial growth factor production	27	-0.551115	-1.66517	sva	0.0112517	0.156342	0.139893
GO:0045117	azole transport	20	-0.600287	-1.68726	sva	0.0113953	0.157591	0.141011
GO:0030431	sleep	31	-0.528881	-1.64872	sva	0.0113957	0.157591	0.141011
GO:0033006	regulation of mast cell activation involved in immune response	26	-0.556452	-1.66681	sva	0.0114938	0.158197	0.141553
GO:0043304	regulation of mast cell degranulation	26	-0.556452	-1.66681	sva	0.0114938	0.158197	0.141553
GO:0009264	deoxyribonucleotide catabolic process	17	-0.628396	-1.69677	sva	0.0115456	0.158534	0.141855
GO:0033273	response to vitamin	80	-0.404885	-1.52341	sva	0.0116292	0.159103	0.142364
GO:0032386	regulation of intracellular transport	363	-0.287795	-1.31922	sva	0.0116802	0.159103	0.142364
GO:0009617	response to bacterium	425	-0.279497	-1.2999	sva	0.0117247	0.159103	0.142364
GO:0031345	negative regulation of cell projection organization	147	-0.348026	-1.4379	sva	0.0117442	0.159103	0.142364
GO:0030810	positive regulation of nucleotide biosynthetic process	59	-0.439385	-1.5651	sva	0.011751	0.159103	0.142364
GO:1900373	positive regulation of purine nucleotide biosynthetic process	59	-0.439385	-1.5651	sva	0.011751	0.159103	0.142364
GO:0002504	antigen processing and presentation of peptide or polysaccharide antigen via MHC class II	90	-0.391599	-1.50265	sva	0.0118476	0.160038	0.143201
GO:0048675	axon extension	107	-0.375423	-1.4811	sva	0.0118799	0.160104	0.143259
GO:0042745	circadian sleep/wake cycle	25	-0.561503	-1.66672	sva	0.011997	0.160845	0.143922
GO:0014072	response to isoquinoline alkaloid	29	-0.537019	-1.64947	sva	0.0120178	0.160845	0.143922
GO:0043278	response to morphine	29	-0.537019	-1.64947	sva	0.0120178	0.160845	0.143922
GO:0062013	positive regulation of small molecule metabolic process	145	-0.348227	-1.43606	sva	0.012126	0.161658	0.14465
GO:0030277	maintenance of gastrointestinal epithelium	14	0.645587	1.69322	sva	0.0121341	0.161658	0.14465
GO:0010453	regulation of cell fate commitment	27	0.530565	1.64713	sva	0.0121681	0.161741	0.144724
GO:0022898	regulation of transmembrane transporter activity	213	-0.319051	-1.38209	sva	0.0122333	0.161865	0.144836
GO:0060579	ventral spinal cord interneuron fate commitment	14	0.645036	1.69177	sva	0.012309	0.161865	0.144836
GO:0060581	cell fate commitment involved in pattern specification	14	0.645036	1.69177	sva	0.012309	0.161865	0.144836
GO:0006692	prostanoid metabolic process	32	-0.521455	-1.63745	sva	0.0123165	0.161865	0.144836
GO:0006693	prostaglandin metabolic process	32	-0.521455	-1.63745	sva	0.0123165	0.161865	0.144836
GO:0071361	cellular response to ethanol	10	-0.721026	-1.69216	sva	0.0124356	0.163064	0.145908
GO:1903306	negative regulation of regulated secretory pathway	20	-0.596554	-1.67677	sva	0.0125183	0.163779	0.146548
GO:1902624	positive regulation of neutrophil migration	21	-0.587849	-1.67225	sva	0.0125814	0.164027	0.14677
GO:0050921	positive regulation of chemotaxis	108	-0.37322	-1.47447	sva	0.012595	0.164027	0.14677
GO:0002888	positive regulation of myeloid leukocyte mediated immunity	19	-0.604885	-1.67911	sva	0.0126218	0.164027	0.14677
GO:0008045	motor neuron axon guidance	21	-0.58751	-1.67129	sva	0.0126966	0.164631	0.147311
GO:0010518	positive regulation of phospholipase activity	42	-0.480329	-1.59958	sva	0.0128613	0.166397	0.148891
GO:0046460	neutral lipid biosynthetic process	33	0.497414	1.61845	sva	0.0129756	0.167132	0.149548
GO:0046463	acylglycerol biosynthetic process	33	0.497414	1.61845	sva	0.0129756	0.167132	0.149548
GO:0006984	ER-nucleus signaling pathway	44	-0.473683	-1.59254	sva	0.0130905	0.167872	0.150211
GO:0009154	purine ribonucleotide catabolic process	30	-0.528502	-1.63548	sva	0.0130907	0.167872	0.150211
GO:0060997	dendritic spine morphogenesis	49	-0.458788	-1.57618	sva	0.0132627	0.169452	0.151624
GO:0090022	regulation of neutrophil chemotaxis	23	-0.570677	-1.66034	sva	0.0132721	0.169452	0.151624
GO:0051259	protein complex oligomerization	464	0.256779	1.25317	sva	0.0133431	0.169881	0.152008
GO:0030730	sequestering of triglyceride	11	0.686338	1.68398	sva	0.013364	0.169881	0.152008
GO:0007628	adult walking behavior	24	0.546013	1.64723	sva	0.0135543	0.171924	0.153836
GO:0071625	vocalization behavior	15	-0.643673	-1.68339	sva	0.0136816	0.172822	0.154639
GO:0051272	positive regulation of cellular component movement	413	-0.279008	-1.29421	sva	0.0136844	0.172822	0.154639
GO:0051656	establishment of organelle localization	407	-0.27946	-1.29472	sva	0.0139825	0.176203	0.157665
GO:0071634	regulation of transforming growth factor beta production	25	-0.555419	-1.64866	sva	0.0140422	0.176574	0.157997
GO:0033559	unsaturated fatty acid metabolic process	83	-0.395781	-1.49829	sva	0.014215	0.17835	0.159586
GO:0035690	cellular response to drug	297	-0.29603	-1.33025	sva	0.0142451	0.17835	0.159586
GO:0097484	dendrite extension	29	-0.530527	-1.62953	sva	0.0142754	0.17835	0.159586
GO:0043301	negative regulation of leukocyte degranulation	10	-0.714737	-1.67741	sva	0.0143347	0.178708	0.159906
GO:2001239	regulation of extrinsic apoptotic signaling pathway in absence of ligand	41	-0.479835	-1.58983	sva	0.0144614	0.179849	0.160927
GO:0045604	regulation of epidermal cell differentiation	50	0.435949	1.5529	sva	0.014488	0.179849	0.160927
GO:0021766	hippocampus development	70	-0.413609	-1.52036	sva	0.0145258	0.179935	0.161004
GO:0015800	acidic amino acid transport	56	-0.43919	-1.54876	sva	0.0146175	0.180686	0.161676
GO:0036465	synaptic vesicle recycling	47	-0.460644	-1.56889	sva	0.0146984	0.181101	0.162048
GO:1903727	positive regulation of phospholipid metabolic process	39	-0.48627	-1.594	sva	0.0147133	0.181101	0.162048
GO:0031649	heat generation	16	-0.628386	-1.6707	sva	0.0147585	0.181275	0.162203
GO:0050851	antigen receptor-mediated signaling pathway	201	-0.319621	-1.37503	sva	0.0147987	0.181385	0.162302
GO:2000136	regulation of cell proliferation involved in heart morphogenesis	15	0.624533	1.66895	sva	0.0149446	0.182789	0.163558
GO:0009101	glycoprotein biosynthetic process	294	-0.295793	-1.32775	sva	0.0150136	0.182968	0.163718
GO:0090102	cochlea development	40	-0.481536	-1.58717	sva	0.0150221	0.182968	0.163718
GO:0046348	amino sugar catabolic process	14	0.636634	1.66974	sva	0.0151038	0.183579	0.164265
GO:1904019	epithelial cell apoptotic process	76	0.384777	1.48518	sva	0.0152145	0.184484	0.165075
GO:0006182	cGMP biosynthetic process	36	-0.496066	-1.59906	sva	0.0152426	0.184484	0.165075
GO:0010042	response to manganese ion	14	-0.650868	-1.67194	sva	0.0152733	0.184484	0.165075
GO:0090394	negative regulation of excitatory postsynaptic potential	10	-0.711737	-1.67036	sva	0.0153305	0.184791	0.16535
GO:0006577	amino-acid betaine metabolic process	16	0.611087	1.66138	sva	0.015365	0.184825	0.16538
GO:0050687	negative regulation of defense response to virus	21	0.563615	1.64474	sva	0.0153968	0.184825	0.16538
GO:0099172	presynapse organization	19	-0.596187	-1.65497	sva	0.0155086	0.185692	0.166155
GO:2000300	regulation of synaptic vesicle exocytosis	25	-0.551187	-1.6361	sva	0.0155328	0.185692	0.166155
GO:0040037	negative regulation of fibroblast growth factor receptor signaling pathway	11	-0.693903	-1.67124	sva	0.0156683	0.186373	0.166765
GO:0002437	inflammatory response to antigenic stimulus	36	-0.494965	-1.59551	sva	0.0157404	0.186373	0.166765
GO:0021549	cerebellum development	86	-0.389619	-1.48391	sva	0.0157443	0.186373	0.166765
GO:0045187	regulation of circadian sleep/wake cycle, sleep	18	-0.605493	-1.65824	sva	0.0157449	0.186373	0.166765
GO:0007224	smoothened signaling pathway	117	0.342579	1.42056	sva	0.0157498	0.186373	0.166765
GO:0009408	response to heat	148	-0.341253	-1.41117	sva	0.0158187	0.186748	0.167101
GO:0051150	regulation of smooth muscle cell differentiation	27	0.520705	1.61652	sva	0.0158457	0.186748	0.167101
GO:0009306	protein secretion	461	-0.272013	-1.27397	sva	0.0160399	0.188502	0.16867
GO:0006688	glycosphingolipid biosynthetic process	21	-0.578105	-1.64454	sva	0.0160593	0.188502	0.16867
GO:2001257	regulation of cation channel activity	138	-0.345967	-1.41701	sva	0.0161649	0.189032	0.169145
GO:1902803	regulation of synaptic vesicle transport	27	-0.537268	-1.62333	sva	0.0161694	0.189032	0.169145
GO:2001023	regulation of response to drug	74	-0.404035	-1.49961	sva	0.0163472	0.189862	0.169887
GO:0070125	mitochondrial translational elongation	80	-0.395626	-1.48857	sva	0.0164504	0.189862	0.169887
GO:0006690	icosanoid metabolic process	87	-0.387155	-1.4774	sva	0.0164521	0.189862	0.169887
GO:1901099	negative regulation of signal transduction in absence of ligand	30	-0.520004	-1.60918	sva	0.0164571	0.189862	0.169887
GO:2001240	negative regulation of extrinsic apoptotic signaling pathway in absence of ligand	30	-0.520004	-1.60918	sva	0.0164571	0.189862	0.169887
GO:0120031	plasma membrane bounded cell projection assembly	483	0.252853	1.2382	sva	0.0164635	0.189862	0.169887
GO:0009165	nucleotide biosynthetic process	314	-0.29086	-1.31454	sva	0.0164686	0.189862	0.169887
GO:0045986	negative regulation of smooth muscle contraction	11	-0.69145	-1.66533	sva	0.0165273	0.189873	0.169897
GO:0061307	cardiac neural crest cell differentiation involved in heart development	10	0.694451	1.65778	sva	0.0165674	0.189873	0.169897
GO:0061308	cardiac neural crest cell development involved in heart development	10	0.694451	1.65778	sva	0.0165674	0.189873	0.169897
GO:0002687	positive regulation of leukocyte migration	97	-0.376389	-1.46195	sva	0.0166407	0.190325	0.170301
GO:0050854	regulation of antigen receptor-mediated signaling pathway	46	-0.459083	-1.55701	sva	0.0167613	0.190325	0.170301
GO:0051004	regulation of lipoprotein lipase activity	16	0.607185	1.65077	sva	0.0167974	0.190325	0.170301
GO:0003298	physiological muscle hypertrophy	15	-0.634736	-1.66002	sva	0.016803	0.190325	0.170301
GO:0003301	physiological cardiac muscle hypertrophy	15	-0.634736	-1.66002	sva	0.016803	0.190325	0.170301
GO:0061049	cell growth involved in cardiac muscle cell development	15	-0.634736	-1.66002	sva	0.016803	0.190325	0.170301
GO:0090279	regulation of calcium ion import	29	-0.524109	-1.60982	sva	0.0169708	0.191534	0.171383
GO:1903861	positive regulation of dendrite extension	16	-0.622261	-1.65442	sva	0.0169806	0.191534	0.171383
GO:0003351	epithelial cilium movement	18	0.585477	1.64169	sva	0.0170114	0.191534	0.171383
GO:0060261	positive regulation of transcription initiation from RNA polymerase II promoter	21	-0.575624	-1.63748	sva	0.017065	0.191534	0.171383
GO:1904646	cellular response to amyloid-beta	24	-0.553617	-1.62741	sva	0.0170743	0.191534	0.171383
GO:0042307	positive regulation of protein import into nucleus	30	-0.518402	-1.60423	sva	0.0171387	0.191888	0.171699
GO:0060441	epithelial tube branching involved in lung morphogenesis	25	0.529964	1.61483	sva	0.017317	0.193512	0.173153
GO:0015844	monoamine transport	64	-0.418068	-1.51206	sva	0.0174242	0.194337	0.173891
GO:0006040	amino sugar metabolic process	35	0.478265	1.57711	sva	0.0174885	0.19468	0.174198
GO:0060767	epithelial cell proliferation involved in prostate gland development	11	0.674063	1.65386	sva	0.0175651	0.195122	0.174593
GO:0060384	innervation	21	-0.574321	-1.63377	sva	0.0176082	0.195122	0.174593
GO:0043954	cellular component maintenance	35	-0.494545	-1.58426	sva	0.0176287	0.195122	0.174593
GO:0010454	negative regulation of cell fate commitment	11	0.673737	1.65306	sva	0.0176977	0.195417	0.174858
GO:0021819	layer formation in cerebral cortex	12	-0.672688	-1.65866	sva	0.0177225	0.195417	0.174858
GO:0071242	cellular response to ammonium ion	52	-0.441865	-1.53572	sva	0.0177583	0.195442	0.17488
GO:0003018	vascular process in circulatory system	143	-0.3412	-1.40438	sva	0.0178169	0.195483	0.174917
GO:0061448	connective tissue development	211	0.295372	1.32875	sva	0.0178292	0.195483	0.174917
GO:0007200	phospholipase C-activating G-protein coupled receptor signaling pathway	90	-0.380855	-1.46142	sva	0.0182233	0.198727	0.177819
GO:0048566	embryonic digestive tract development	32	-0.506587	-1.59076	sva	0.0182368	0.198727	0.177819
GO:0009261	ribonucleotide catabolic process	31	-0.511108	-1.59332	sva	0.0182441	0.198727	0.177819
GO:0031128	developmental induction	25	0.527825	1.60831	sva	0.0182616	0.198727	0.177819
GO:2000811	negative regulation of anoikis	15	0.615358	1.64443	sva	0.018358	0.199086	0.17814
GO:0016049	cell growth	424	-0.273944	-1.27379	sva	0.0184005	0.199086	0.17814
GO:0042108	positive regulation of cytokine biosynthetic process	46	-0.455938	-1.54634	sva	0.0184181	0.199086	0.17814
GO:0072028	nephron morphogenesis	63	0.400145	1.49149	sva	0.0184313	0.199086	0.17814
GO:2000171	negative regulation of dendrite development	24	-0.549852	-1.61634	sva	0.0187076	0.201368	0.180182
GO:0032732	positive regulation of interleukin-1 production	38	-0.481283	-1.56935	sva	0.0187118	0.201368	0.180182
GO:0042359	vitamin D metabolic process	17	-0.607568	-1.64053	sva	0.0187983	0.201914	0.180671
GO:0045981	positive regulation of nucleotide metabolic process	75	-0.398541	-1.48269	sva	0.0188666	0.201914	0.180671
GO:1900544	positive regulation of purine nucleotide metabolic process	75	-0.398541	-1.48269	sva	0.0188666	0.201914	0.180671
GO:0009743	response to carbohydrate	198	-0.316044	-1.35725	sva	0.0189534	0.202471	0.18117
GO:0008016	regulation of heart contraction	209	-0.312584	-1.35106	sva	0.0190094	0.202698	0.181372
GO:0010842	retina layer formation	21	-0.570786	-1.62371	sva	0.0191706	0.204042	0.182575
GO:0042044	fluid transport	24	0.53219	1.60553	sva	0.0192336	0.204339	0.182841
GO:0019432	triglyceride biosynthetic process	31	0.492052	1.5784	sva	0.0193455	0.205154	0.18357
GO:1902622	regulation of neutrophil migration	25	-0.541593	-1.60762	sva	0.0195489	0.206934	0.185163
GO:0021795	cerebral cortex cell migration	39	-0.475942	-1.56014	sva	0.0196227	0.207062	0.185277
GO:0009152	purine ribonucleotide biosynthetic process	249	-0.30116	-1.32804	sva	0.0196382	0.207062	0.185277
GO:0032891	negative regulation of organic acid transport	16	-0.61589	-1.63748	sva	0.0196677	0.207062	0.185277
GO:0010889	regulation of sequestering of triglyceride	10	0.686502	1.63881	sva	0.0197512	0.207566	0.185728
GO:0046546	development of primary male sexual characteristics	117	0.337478	1.39941	sva	0.019842	0.208008	0.186124
GO:0072488	ammonium transmembrane transport	13	0.637737	1.6389	sva	0.0198936	0.208008	0.186124
GO:0050802	circadian sleep/wake cycle, sleep	22	-0.561249	-1.61535	sva	0.0199005	0.208008	0.186124
GO:0046386	deoxyribose phosphate catabolic process	18	-0.594773	-1.62888	sva	0.0199682	0.208242	0.186333
GO:0050919	negative chemotaxis	32	-0.502886	-1.57914	sva	0.0199944	0.208242	0.186333
GO:0043087	regulation of GTPase activity	410	-0.274403	-1.27211	sva	0.020059	0.208542	0.186601
GO:0071604	transforming growth factor beta production	26	-0.534277	-1.60039	sva	0.0201009	0.208605	0.186658
GO:0008584	male gonad development	116	0.337848	1.39898	sva	0.0201393	0.208632	0.186682
GO:0046459	short-chain fatty acid metabolic process	13	0.636838	1.63659	sva	0.0202529	0.209435	0.187401
GO:0071468	cellular response to acidic pH	11	0.667429	1.63758	sva	0.0203684	0.209796	0.187723
GO:1904874	positive regulation of telomerase RNA localization to Cajal body	15	-0.625674	-1.63632	sva	0.0203923	0.209796	0.187723
GO:0043001	Golgi to plasma membrane protein transport	29	0.50016	1.57927	sva	0.0203958	0.209796	0.187723
GO:1901293	nucleoside phosphate biosynthetic process	318	-0.286759	-1.29774	sva	0.0204679	0.210166	0.188054
GO:1905314	semi-lunar valve development	15	0.610006	1.63013	sva	0.0207298	0.212481	0.190126
GO:0001975	response to amphetamine	24	-0.544833	-1.60159	sva	0.0210184	0.214477	0.191912
GO:0035418	protein localization to synapse	33	-0.496449	-1.56968	sva	0.0210349	0.214477	0.191912
GO:0030073	insulin secretion	183	-0.319467	-1.35851	sva	0.0210379	0.214477	0.191912
GO:0009437	carnitine metabolic process	13	0.634807	1.63138	sva	0.0210719	0.214477	0.191912
GO:0030825	positive regulation of cGMP metabolic process	17	-0.601153	-1.62321	sva	0.0214779	0.218024	0.195086
GO:0010977	negative regulation of neuron projection development	127	-0.346159	-1.40099	sva	0.0215294	0.218024	0.195086
GO:0045606	positive regulation of epidermal cell differentiation	20	0.557565	1.6073	sva	0.0215328	0.218024	0.195086
GO:0055090	acylglycerol homeostasis	25	0.520292	1.58536	sva	0.0217872	0.219836	0.196707
GO:0070328	triglyceride homeostasis	25	0.520292	1.58536	sva	0.0217872	0.219836	0.196707
GO:0097485	neuron projection guidance	237	-0.30225	-1.32569	sva	0.0219084	0.220676	0.197459
GO:0051988	regulation of attachment of spindle microtubules to kinetochore	11	-0.677752	-1.63234	sva	0.0221502	0.222628	0.199206
GO:0014046	dopamine secretion	23	-0.54913	-1.59765	sva	0.0222527	0.222628	0.199206
GO:0014059	regulation of dopamine secretion	23	-0.54913	-1.59765	sva	0.0222527	0.222628	0.199206
GO:0006164	purine nucleotide biosynthetic process	252	-0.2983	-1.31712	sva	0.0222764	0.222628	0.199206
GO:0060999	positive regulation of dendritic spine development	37	-0.477994	-1.54971	sva	0.0222934	0.222628	0.199206
GO:0021692	cerebellar Purkinje cell layer morphogenesis	11	0.662924	1.62653	sva	0.0223639	0.222637	0.199214
GO:0015908	fatty acid transport	75	-0.39367	-1.46457	sva	0.0224345	0.222637	0.199214
GO:0038034	signal transduction in absence of ligand	63	-0.412198	-1.48631	sva	0.0224473	0.222637	0.199214
GO:0097192	extrinsic apoptotic signaling pathway in absence of ligand	63	-0.412198	-1.48631	sva	0.0224473	0.222637	0.199214
GO:0002864	regulation of acute inflammatory response to antigenic stimulus	12	-0.661066	-1.63	sva	0.0225301	0.222828	0.199384
GO:0048488	synaptic vesicle endocytosis	37	-0.477612	-1.54847	sva	0.022543	0.222828	0.199384
GO:1900273	positive regulation of long-term synaptic potentiation	15	-0.620649	-1.62318	sva	0.0226344	0.223148	0.199671
GO:0051590	positive regulation of neurotransmitter transport	25	-0.535482	-1.58948	sva	0.0226521	0.223148	0.199671
GO:0019722	calcium-mediated signaling	147	-0.333797	-1.37911	sva	0.022742	0.223655	0.200125
GO:0048013	ephrin receptor signaling pathway	84	-0.381753	-1.44825	sva	0.0229588	0.22516	0.201471
GO:0050771	negative regulation of axonogenesis	57	-0.422504	-1.49491	sva	0.0229724	0.22516	0.201471
GO:0051057	positive regulation of small GTPase mediated signal transduction	49	-0.440301	-1.51266	sva	0.0230198	0.225246	0.201548
GO:0043270	positive regulation of ion transport	216	-0.307076	-1.33241	sva	0.0231049	0.225626	0.201888
GO:1901605	alpha-amino acid metabolic process	189	0.298044	1.32222	sva	0.023178	0.225626	0.201888
GO:0021516	dorsal spinal cord development	19	0.562846	1.60072	sva	0.0232057	0.225626	0.201888
GO:0009314	response to radiation	383	-0.275626	-1.26979	sva	0.0232136	0.225626	0.201888
GO:0002696	positive regulation of leukocyte activation	250	-0.298049	-1.31485	sva	0.0232575	0.225675	0.201932
GO:0018410	C-terminal protein amino acid modification	65	-0.407566	-1.47814	sva	0.0233092	0.225801	0.202044
GO:0006937	regulation of muscle contraction	138	-0.337571	-1.38262	sva	0.0234841	0.227117	0.203223
GO:0051588	regulation of neurotransmitter transport	81	-0.384175	-1.44855	sva	0.0237049	0.227447	0.203518
GO:0090066	regulation of anatomical structure size	432	-0.269733	-1.25623	sva	0.0237386	0.227447	0.203518
GO:0003015	heart process	240	-0.299903	-1.31719	sva	0.0237654	0.227447	0.203518
GO:0032890	regulation of organic acid transport	47	-0.444338	-1.51335	sva	0.0237746	0.227447	0.203518
GO:0060675	ureteric bud morphogenesis	51	0.417073	1.49148	sva	0.0237826	0.227447	0.203518
GO:0044282	small molecule catabolic process	366	0.260554	1.24437	sva	0.0237873	0.227447	0.203518
GO:0051967	negative regulation of synaptic transmission, glutamatergic	11	-0.674176	-1.62373	sva	0.0237917	0.227447	0.203518
GO:0002705	positive regulation of leukocyte mediated immunity	82	-0.382831	-1.44647	sva	0.0239147	0.228248	0.204235
GO:0051260	protein homooligomerization	285	0.273007	1.27139	sva	0.0239614	0.22832	0.204298
GO:0032418	lysosome localization	61	-0.413047	-1.4805	sva	0.0243122	0.231283	0.20695
GO:0002320	lymphoid progenitor cell differentiation	17	0.579676	1.60092	sva	0.024405	0.231787	0.207401
GO:1903169	regulation of calcium ion transmembrane transport	126	-0.343874	-1.39017	sva	0.0244816	0.231982	0.207575
GO:0022612	gland morphogenesis	102	0.344241	1.39683	sva	0.0245384	0.231982	0.207575
GO:0071474	cellular hyperosmotic response	11	0.658507	1.61569	sva	0.024545	0.231982	0.207575
GO:0009260	ribonucleotide biosynthetic process	261	-0.294537	-1.3054	sva	0.0245975	0.232101	0.207682
GO:0030804	positive regulation of cyclic nucleotide biosynthetic process	36	-0.477377	-1.53882	sva	0.0249986	0.235505	0.210728
GO:0030048	actin filament-based movement	116	0.332714	1.37772	sva	0.0250824	0.235541	0.21076
GO:1902713	regulation of interferon-gamma secretion	10	-0.688776	-1.61648	sva	0.0251172	0.235541	0.21076
GO:0070168	negative regulation of biomineral tissue development	16	0.589085	1.60156	sva	0.0252301	0.235541	0.21076
GO:0032543	mitochondrial translation	117	-0.349009	-1.3956	sva	0.0252321	0.235541	0.21076
GO:0050867	positive regulation of cell activation	259	-0.294489	-1.30427	sva	0.0252414	0.235541	0.21076
GO:0033169	histone H3-K9 demethylation	13	0.626276	1.60945	sva	0.0252453	0.235541	0.21076
GO:0060457	negative regulation of digestive system process	13	-0.639853	-1.61216	sva	0.0254902	0.236736	0.211829
GO:0021781	glial cell fate commitment	12	0.64062	1.61052	sva	0.0254946	0.236736	0.211829
GO:0046390	ribose phosphate biosynthetic process	265	-0.293099	-1.30135	sva	0.0254953	0.236736	0.211829
GO:0044003	modification by symbiont of host morphology or physiology	40	0.444963	1.51169	sva	0.0257615	0.238455	0.213367
GO:0035561	regulation of chromatin binding	21	0.5408	1.57816	sva	0.0257623	0.238455	0.213367
GO:0042558	pteridine-containing compound metabolic process	32	0.475762	1.53713	sva	0.0259513	0.239551	0.214348
GO:0086003	cardiac muscle cell contraction	55	0.405008	1.4704	sva	0.025963	0.239551	0.214348
GO:0045453	bone resorption	49	0.41894	1.48597	sva	0.026091	0.240351	0.215064
GO:0006023	aminoglycan biosynthetic process	98	-0.363548	-1.41452	sva	0.026145	0.240468	0.215169
GO:0009247	glycolipid biosynthetic process	58	-0.41603	-1.4769	sva	0.0262535	0.241085	0.215721
GO:0061050	regulation of cell growth involved in cardiac muscle cell development	11	-0.668867	-1.61095	sva	0.0263139	0.241259	0.215876
GO:0006636	unsaturated fatty acid biosynthetic process	37	-0.471539	-1.52879	sva	0.0264019	0.241348	0.215956
GO:0038083	peptidyl-tyrosine autophosphorylation	48	0.420752	1.48624	sva	0.0264183	0.241348	0.215956
GO:0050880	regulation of blood vessel size	121	-0.345155	-1.38711	sva	0.0264479	0.241348	0.215956
GO:1903429	regulation of cell maturation	16	-0.601654	-1.59963	sva	0.0264929	0.24138	0.215984
GO:0070126	mitochondrial translational termination	82	-0.379551	-1.43408	sva	0.0267035	0.242919	0.217362
GO:0060438	trachea development	19	0.555593	1.58009	sva	0.0269125	0.244438	0.218721
GO:0002827	positive regulation of T-helper 1 type immune response	11	-0.667408	-1.60743	sva	0.0270278	0.245102	0.219315
GO:1905269	positive regulation of chromatin organization	86	0.356769	1.4072	sva	0.027151	0.2452	0.219403
GO:0048771	tissue remodeling	132	0.320703	1.35402	sva	0.0271984	0.2452	0.219403
GO:0009953	dorsal/ventral pattern formation	82	0.361334	1.4132	sva	0.0272256	0.2452	0.219403
GO:0048247	lymphocyte chemotaxis	39	-0.4633	-1.5187	sva	0.0272294	0.2452	0.219403
GO:0072522	purine-containing compound biosynthetic process	261	-0.29276	-1.29753	sva	0.0272491	0.2452	0.219403
GO:2000209	regulation of anoikis	22	0.530482	1.56606	sva	0.027464	0.246752	0.220792
GO:0032731	positive regulation of interleukin-1 beta production	32	-0.489938	-1.53848	sva	0.0275364	0.247022	0.221033
GO:0071624	positive regulation of granulocyte chemotaxis	21	-0.554015	-1.576	sva	0.0276445	0.24761	0.221559
GO:0010667	negative regulation of cardiac muscle cell apoptotic process	19	0.554057	1.57572	sva	0.0277654	0.248112	0.222009
GO:0048739	cardiac muscle fiber development	10	0.669817	1.59898	sva	0.0277859	0.248112	0.222009
GO:0071364	cellular response to epidermal growth factor stimulus	38	0.449365	1.50933	sva	0.0278754	0.24816	0.222052
GO:0001505	regulation of neurotransmitter levels	268	-0.29075	-1.29253	sva	0.0278765	0.24816	0.222052
GO:0006921	cellular component disassembly involved in execution phase of apoptosis	28	0.492465	1.54249	sva	0.0279465	0.248404	0.222269
GO:0060047	heart contraction	237	-0.297715	-1.3058	sva	0.0279979	0.24847	0.222329
GO:0060795	cell fate commitment involved in formation of primary germ layer	32	0.472546	1.52674	sva	0.0280393	0.24847	0.222329
GO:0090277	positive regulation of peptide hormone secretion	83	-0.376991	-1.42716	sva	0.0281479	0.249053	0.22285
GO:0030279	negative regulation of ossification	59	0.394289	1.45105	sva	0.0282627	0.24969	0.22342
GO:0031349	positive regulation of defense response	367	-0.274533	-1.25973	sva	0.0284991	0.251396	0.224947
GO:1904706	negative regulation of vascular smooth muscle cell proliferation	15	0.594084	1.58758	sva	0.0286146	0.251795	0.225304
GO:0009100	glycoprotein metabolic process	354	-0.276201	-1.26311	sva	0.0286308	0.251795	0.225304
GO:0045987	positive regulation of smooth muscle contraction	33	-0.483563	-1.52894	sva	0.0288464	0.253308	0.226658
GO:0002544	chronic inflammatory response	17	-0.58686	-1.58462	sva	0.028947	0.253341	0.226687
GO:0007584	response to nutrient	182	-0.31342	-1.33199	sva	0.0289497	0.253341	0.226687
GO:2000060	positive regulation of ubiquitin-dependent protein catabolic process	87	-0.371639	-1.4182	sva	0.0289806	0.253341	0.226687
GO:0002495	antigen processing and presentation of peptide antigen via MHC class II	89	-0.36933	-1.41473	sva	0.0291699	0.254479	0.227706
GO:0000038	very long-chain fatty acid metabolic process	23	-0.536404	-1.56063	sva	0.0292415	0.254479	0.227706
GO:0045732	positive regulation of protein catabolic process	189	-0.310746	-1.32674	sva	0.0292419	0.254479	0.227706
GO:0019229	regulation of vasoconstriction	55	-0.418153	-1.46965	sva	0.0294039	0.25533	0.228467
GO:0009071	serine family amino acid catabolic process	11	0.649359	1.59325	sva	0.0294274	0.25533	0.228467
GO:0070252	actin-mediated cell contraction	92	0.348462	1.39009	sva	0.0295165	0.255721	0.228817
GO:1902042	negative regulation of extrinsic apoptotic signaling pathway via death domain receptors	29	0.484614	1.53019	sva	0.0296497	0.256494	0.229509
GO:1902170	cellular response to reactive nitrogen species	17	0.570197	1.57474	sva	0.0297034	0.256578	0.229584
GO:0009954	proximal/distal pattern formation	28	-0.506029	-1.54137	sva	0.0298337	0.256923	0.229892
GO:0030540	female genitalia development	16	-0.595649	-1.58366	sva	0.0298658	0.256923	0.229892
GO:1900274	regulation of phospholipase C activity	30	-0.495578	-1.53359	sva	0.0299075	0.256923	0.229892
GO:0101023	vascular endothelial cell proliferation	18	0.559589	1.5691	sva	0.0299641	0.256923	0.229892
GO:1905562	regulation of vascular endothelial cell proliferation	18	0.559589	1.5691	sva	0.0299641	0.256923	0.229892
GO:0043276	anoikis	30	0.478979	1.52449	sva	0.0300143	0.256976	0.22994
GO:0002704	negative regulation of leukocyte mediated immunity	38	-0.462593	-1.50841	sva	0.030147	0.257249	0.230184
GO:0032594	protein transport within lipid bilayer	26	-0.516597	-1.54743	sva	0.0302132	0.257249	0.230184
GO:0006646	phosphatidylethanolamine biosynthetic process	12	0.631988	1.58882	sva	0.0303193	0.257249	0.230184
GO:0006120	mitochondrial electron transport, NADH to ubiquinone	39	-0.458957	-1.50446	sva	0.0303444	0.257249	0.230184
GO:0003016	respiratory system process	26	-0.516273	-1.54646	sva	0.0303978	0.257249	0.230184
GO:0035150	regulation of tube size	122	-0.341086	-1.3723	sva	0.0304195	0.257249	0.230184
GO:0001941	postsynaptic membrane organization	33	-0.481183	-1.52141	sva	0.030463	0.257249	0.230184
GO:0098712	L-glutamate import across plasma membrane	10	-0.678581	-1.59255	sva	0.0304741	0.257249	0.230184
GO:0015671	oxygen transport	13	0.616719	1.58489	sva	0.0304943	0.257249	0.230184
GO:0043011	myeloid dendritic cell differentiation	16	-0.594467	-1.58052	sva	0.0305012	0.257249	0.230184
GO:0010771	negative regulation of cell morphogenesis involved in differentiation	82	-0.375582	-1.41909	sva	0.0305323	0.257249	0.230184
GO:0060452	positive regulation of cardiac muscle contraction	11	-0.660863	-1.59167	sva	0.0306051	0.257252	0.230186
GO:1905048	regulation of metallopeptidase activity	16	0.579192	1.57466	sva	0.0307487	0.257252	0.230186
GO:1904035	regulation of epithelial cell apoptotic process	58	0.393441	1.44327	sva	0.0307532	0.257252	0.230186
GO:0015909	long-chain fatty acid transport	53	-0.420747	-1.46792	sva	0.0307573	0.257252	0.230186
GO:0048333	mesodermal cell differentiation	30	0.477913	1.52109	sva	0.0307922	0.257252	0.230186
GO:0019369	arachidonic acid metabolic process	42	-0.448822	-1.49466	sva	0.0307977	0.257252	0.230186
GO:2000392	regulation of lamellipodium morphogenesis	11	0.646673	1.58666	sva	0.0308863	0.257621	0.230517
GO:0044070	regulation of anion transport	76	-0.382239	-1.42525	sva	0.0312574	0.260062	0.232701
GO:0007631	feeding behavior	91	-0.36525	-1.40402	sva	0.0313013	0.260062	0.232701
GO:0043624	cellular protein complex disassembly	192	-0.308387	-1.31922	sva	0.0313129	0.260062	0.232701
GO:0086002	cardiac muscle cell action potential involved in contraction	46	0.420099	1.47068	sva	0.031395	0.260173	0.2328
GO:1904591	positive regulation of protein import	33	-0.479724	-1.5168	sva	0.0314156	0.260173	0.2328
GO:1901072	glucosamine-containing compound catabolic process	10	0.663337	1.58351	sva	0.0315186	0.260655	0.233232
GO:0048521	negative regulation of behavior	14	-0.615346	-1.58069	sva	0.0318888	0.263343	0.235637
GO:0033004	negative regulation of mast cell activation	10	-0.67542	-1.58513	sva	0.0322315	0.264738	0.236885
GO:0006882	cellular zinc ion homeostasis	30	0.475848	1.51452	sva	0.0323817	0.264738	0.236885
GO:0050746	regulation of lipoprotein metabolic process	12	0.628294	1.57953	sva	0.0324187	0.264738	0.236885
GO:0097104	postsynaptic membrane assembly	11	-0.657631	-1.58388	sva	0.0324565	0.264738	0.236885
GO:0010878	cholesterol storage	13	0.613519	1.57667	sva	0.0324649	0.264738	0.236885
GO:0010885	regulation of cholesterol storage	13	0.613519	1.57667	sva	0.0324649	0.264738	0.236885
GO:1903115	regulation of actin filament-based movement	39	0.439512	1.48497	sva	0.032493	0.264738	0.236885
GO:0031282	regulation of guanylate cyclase activity	10	-0.674928	-1.58398	sva	0.0325522	0.264738	0.236885
GO:0001658	branching involved in ureteric bud morphogenesis	49	0.410698	1.45674	sva	0.032558	0.264738	0.236885
GO:0055069	zinc ion homeostasis	31	0.470756	1.51009	sva	0.0326288	0.264738	0.236885
GO:0007179	transforming growth factor beta receptor signaling pathway	156	-0.321299	-1.33843	sva	0.0326709	0.264738	0.236885
GO:1903844	regulation of cellular response to transforming growth factor beta stimulus	99	-0.356582	-1.38954	sva	0.03271	0.264738	0.236885
GO:0030193	regulation of blood coagulation	60	-0.404916	-1.44673	sva	0.0327219	0.264738	0.236885
GO:1900046	regulation of hemostasis	60	-0.404916	-1.44673	sva	0.0327219	0.264738	0.236885
GO:0022037	metencephalon development	95	-0.360173	-1.39432	sva	0.0327398	0.264738	0.236885
GO:0046928	regulation of neurotransmitter secretion	50	-0.425054	-1.4662	sva	0.0328728	0.265155	0.237258
GO:1900182	positive regulation of protein localization to nucleus	60	-0.404705	-1.44598	sva	0.0329168	0.265155	0.237258
GO:0003407	neural retina development	55	-0.414045	-1.45521	sva	0.0329281	0.265155	0.237258
GO:0009151	purine deoxyribonucleotide metabolic process	11	-0.656389	-1.58089	sva	0.0332645	0.267494	0.239352
GO:0035338	long-chain fatty-acyl-CoA biosynthetic process	16	-0.589689	-1.56782	sva	0.0334091	0.268287	0.240061
GO:0010863	positive regulation of phospholipase C activity	28	-0.500279	-1.52385	sva	0.0339103	0.271585	0.243011
GO:0021854	hypothalamus development	18	-0.569565	-1.55985	sva	0.0339131	0.271585	0.243011
GO:0033081	regulation of T cell differentiation in thymus	21	-0.543594	-1.54636	sva	0.0340437	0.272012	0.243394
GO:0031016	pancreas development	67	0.374926	1.41388	sva	0.0340743	0.272012	0.243394
GO:0001702	gastrulation with mouth forming second	23	-0.528942	-1.53892	sva	0.0341389	0.272012	0.243394
GO:0032228	regulation of synaptic transmission, GABAergic	28	-0.499848	-1.52254	sva	0.0341592	0.272012	0.243394
GO:0050930	induction of positive chemotaxis	13	-0.624325	-1.57303	sva	0.0342216	0.272012	0.243394
GO:0006470	protein dephosphorylation	269	-0.28702	-1.27634	sva	0.0342468	0.272012	0.243394
GO:0051938	L-glutamate import	11	-0.654664	-1.57674	sva	0.0343275	0.272281	0.243635
GO:1901890	positive regulation of cell junction assembly	26	0.493911	1.51946	sva	0.0344929	0.273091	0.24436
GO:0043271	negative regulation of ion transport	121	-0.338412	-1.36001	sva	0.0345234	0.273091	0.24436
GO:0002685	regulation of leukocyte migration	135	-0.330047	-1.34757	sva	0.0346469	0.273485	0.244712
GO:1902117	positive regulation of organelle assembly	56	0.393152	1.43235	sva	0.0346918	0.273485	0.244712
GO:0048511	rhythmic process	247	-0.291346	-1.28359	sva	0.0348069	0.273485	0.244712
GO:0061647	histone H3-K9 modification	37	0.443833	1.48212	sva	0.0348288	0.273485	0.244712
GO:0007411	axon guidance	235	-0.294097	-1.28875	sva	0.0348316	0.273485	0.244712
GO:0097048	dendritic cell apoptotic process	10	-0.671094	-1.57498	sva	0.034902	0.273485	0.244712
GO:2000668	regulation of dendritic cell apoptotic process	10	-0.671094	-1.57498	sva	0.034902	0.273485	0.244712
GO:0035336	long-chain fatty-acyl-CoA metabolic process	22	-0.534651	-1.5388	sva	0.035148	0.274369	0.245503
GO:1901071	glucosamine-containing compound metabolic process	24	0.505424	1.52478	sva	0.0351516	0.274369	0.245503
GO:0022029	telencephalon cell migration	50	-0.422571	-1.45764	sva	0.0351561	0.274369	0.245503
GO:0021904	dorsal/ventral neural tube patterning	22	0.518982	1.53211	sva	0.0352316	0.274589	0.2457
GO:0006457	protein folding	217	-0.298432	-1.29568	sva	0.0354131	0.275635	0.246636
GO:0030826	regulation of cGMP biosynthetic process	19	-0.557805	-1.54842	sva	0.0355757	0.276531	0.247437
GO:0006026	aminoglycan catabolic process	59	0.386356	1.42186	sva	0.0358928	0.278287	0.249009
GO:1990748	cellular detoxification	88	0.347133	1.37471	sva	0.0358972	0.278287	0.249009
GO:0090050	positive regulation of cell migration involved in sprouting angiogenesis	21	-0.540705	-1.53814	sva	0.0360264	0.278612	0.2493
GO:0051385	response to mineralocorticoid	28	-0.497377	-1.51501	sva	0.0360512	0.278612	0.2493
GO:0016082	synaptic vesicle priming	15	-0.596641	-1.56039	sva	0.0361199	0.278612	0.2493
GO:0097150	neuronal stem cell population maintenance	21	0.524937	1.53187	sva	0.0361403	0.278612	0.2493
GO:0051044	positive regulation of membrane protein ectodomain proteolysis	12	-0.636032	-1.56828	sva	0.0361785	0.278612	0.2493
GO:1903035	negative regulation of response to wounding	66	-0.391387	-1.42323	sva	0.036445	0.280294	0.250805
GO:0071294	cellular response to zinc ion	16	0.570405	1.55077	sva	0.0365152	0.280464	0.250956
GO:0008298	intracellular mRNA localization	11	0.637575	1.56433	sva	0.0366359	0.28102	0.251454
GO:0006501	C-terminal protein lipidation	58	-0.404241	-1.43504	sva	0.0369677	0.283192	0.253398
GO:0042310	vasoconstriction	68	-0.387528	-1.41698	sva	0.037185	0.283951	0.254077
GO:0032104	regulation of response to extracellular stimulus	20	0.531474	1.53208	sva	0.0372131	0.283951	0.254077
GO:0032107	regulation of response to nutrient levels	20	0.531474	1.53208	sva	0.0372131	0.283951	0.254077
GO:0001960	negative regulation of cytokine-mediated signaling pathway	47	0.410596	1.44412	sva	0.0375781	0.286197	0.256087
GO:0010939	regulation of necrotic cell death	21	0.523024	1.52629	sva	0.0376058	0.286197	0.256087
GO:0051969	regulation of transmission of nerve impulse	13	0.605349	1.55567	sva	0.0377406	0.286848	0.256669
GO:0048844	artery morphogenesis	61	0.381187	1.41193	sva	0.0378231	0.2871	0.256895
GO:0045779	negative regulation of bone resorption	11	0.635413	1.55903	sva	0.0381028	0.288847	0.258458
GO:0042073	intraciliary transport	44	0.417797	1.44867	sva	0.0382561	0.289632	0.25916
GO:0051817	modification of morphology or physiology of other organism involved in symbiotic interaction	95	0.33861	1.35799	sva	0.0383232	0.289764	0.259278
GO:0009636	response to toxic substance	426	-0.263598	-1.22623	sva	0.0384832	0.290596	0.260022
GO:0048813	dendrite morphogenesis	123	-0.334308	-1.34665	sva	0.0386658	0.29101	0.260393
GO:0007176	regulation of epidermal growth factor-activated receptor activity	25	-0.510427	-1.51511	sva	0.0386824	0.29101	0.260393
GO:0072077	renal vesicle morphogenesis	17	0.556933	1.53811	sva	0.0386918	0.29101	0.260393
GO:0006970	response to osmotic stress	59	0.3838	1.41245	sva	0.038738	0.29101	0.260393
GO:0031398	positive regulation of protein ubiquitination	85	-0.36487	-1.38692	sva	0.0389364	0.292124	0.26139
GO:0010996	response to auditory stimulus	21	-0.53669	-1.52672	sva	0.0390244	0.292407	0.261643
GO:0097094	craniofacial suture morphogenesis	14	0.589846	1.54702	sva	0.0391476	0.292953	0.262131
GO:0072078	nephron tubule morphogenesis	59	0.383226	1.41033	sva	0.0393671	0.294217	0.263263
GO:0030198	extracellular matrix organization	293	0.263842	1.23235	sva	0.0397186	0.296093	0.264942
GO:0050866	negative regulation of cell activation	148	-0.320045	-1.32346	sva	0.0397198	0.296093	0.264942
GO:0031056	regulation of histone modification	128	0.313952	1.31969	sva	0.0398673	0.296813	0.265585
GO:0046579	positive regulation of Ras protein signal transduction	44	-0.432555	-1.45427	sva	0.0399368	0.29695	0.265708
GO:0061333	renal tubule morphogenesis	61	0.379177	1.40448	sva	0.0400358	0.297075	0.26582
GO:0042416	dopamine biosynthetic process	10	-0.663035	-1.55606	sva	0.0400738	0.297075	0.26582
GO:0061323	cell proliferation involved in heart morphogenesis	15	0.576389	1.54029	sva	0.0401067	0.297075	0.26582
GO:0035966	response to topologically incorrect protein	179	-0.307317	-1.30337	sva	0.0403859	0.298385	0.266992
GO:0031623	receptor internalization	82	-0.366936	-1.38642	sva	0.0404885	0.298385	0.266992
GO:0070085	glycosylation	228	-0.292895	-1.27899	sva	0.0404904	0.298385	0.266992
GO:0061001	regulation of dendritic spine morphogenesis	35	-0.460665	-1.47572	sva	0.0405797	0.298385	0.266992
GO:0098869	cellular oxidant detoxification	84	0.347581	1.36536	sva	0.040595	0.298385	0.266992
GO:0046849	bone remodeling	70	0.364897	1.38743	sva	0.0406303	0.298385	0.266992
GO:0022604	regulation of cell morphogenesis	422	-0.263208	-1.22328	sva	0.0406423	0.298385	0.266992
GO:0060670	branching involved in labyrinthine layer morphogenesis	11	-0.644787	-1.55295	sva	0.0408231	0.29924	0.267757
GO:0051216	cartilage development	160	0.297885	1.29251	sva	0.0408615	0.29924	0.267757
GO:0071236	cellular response to antibiotic	120	-0.334596	-1.34301	sva	0.0409969	0.299809	0.268266
GO:0072088	nephron epithelium morphogenesis	61	0.378324	1.40132	sva	0.0410763	0.299809	0.268266
GO:0061577	calcium ion transmembrane transport via high voltage-gated calcium channel	12	-0.628806	-1.55046	sva	0.0410937	0.299809	0.268266
GO:0007183	SMAD protein complex assembly	14	-0.601406	-1.54488	sva	0.0411847	0.300097	0.268524
GO:0006024	glycosaminoglycan biosynthetic process	94	-0.353965	-1.36792	sva	0.0418258	0.303458	0.271531
GO:2000826	regulation of heart morphogenesis	32	0.455646	1.47213	sva	0.0418474	0.303458	0.271531
GO:0072176	nephric duct development	12	0.614103	1.54386	sva	0.0419167	0.303458	0.271531
GO:0030262	apoptotic nuclear changes	26	0.484817	1.49148	sva	0.0419492	0.303458	0.271531
GO:0097503	sialylation	17	-0.567133	-1.53135	sva	0.041957	0.303458	0.271531
GO:0003177	pulmonary valve development	12	0.613975	1.54353	sva	0.0420108	0.303458	0.271531
GO:0003184	pulmonary valve morphogenesis	12	0.613975	1.54353	sva	0.0420108	0.303458	0.271531
GO:0046434	organophosphate catabolic process	191	-0.302371	-1.29259	sva	0.0422823	0.304991	0.272904
GO:0006986	response to unfolded protein	161	-0.313128	-1.30986	sva	0.0423279	0.304991	0.272904
GO:0140115	export across plasma membrane	19	-0.548603	-1.52288	sva	0.0424085	0.305194	0.273085
GO:1900452	regulation of long term synaptic depression	11	-0.642267	-1.54688	sva	0.0426137	0.306293	0.274068
GO:0090287	regulation of cellular response to growth factor stimulus	224	-0.292889	-1.27636	sva	0.0427064	0.30658	0.274325
GO:0051262	protein tetramerization	138	0.306929	1.30409	sva	0.0429186	0.307724	0.275349
GO:0030534	adult behavior	120	-0.333118	-1.33708	sva	0.0433456	0.309536	0.27697
GO:0017015	regulation of transforming growth factor beta receptor signaling pathway	97	-0.35007	-1.35973	sva	0.0433522	0.309536	0.27697
GO:0050818	regulation of coagulation	64	-0.388355	-1.4046	sva	0.0433691	0.309536	0.27697
GO:0045932	negative regulation of muscle contraction	18	-0.556324	-1.52359	sva	0.043384	0.309536	0.27697
GO:0021675	nerve development	68	-0.382219	-1.39757	sva	0.04349	0.309913	0.277307
GO:1905515	non-motile cilium assembly	46	0.407062	1.42504	sva	0.0437736	0.311553	0.278774
GO:0071417	cellular response to organonitrogen compound	479	-0.257088	-1.2078	sva	0.0440887	0.313412	0.280438
GO:0019377	glycolipid catabolic process	11	-0.64014	-1.54176	sva	0.0442474	0.314157	0.281105
GO:0001767	establishment of lymphocyte polarity	11	-0.640022	-1.54147	sva	0.0443514	0.314511	0.281422
GO:0071392	cellular response to estradiol stimulus	32	-0.468536	-1.47127	sva	0.044582	0.315479	0.282288
GO:0007202	activation of phospholipase C activity	19	-0.546001	-1.51566	sva	0.0445962	0.315479	0.282288
GO:1905564	positive regulation of vascular endothelial cell proliferation	13	0.595685	1.53084	sva	0.0448043	0.316304	0.283026
GO:0030510	regulation of BMP signaling pathway	71	0.360415	1.37397	sva	0.0448215	0.316304	0.283026
GO:0014856	skeletal muscle cell proliferation	14	0.582124	1.52677	sva	0.0449347	0.316719	0.283397
GO:0071804	cellular potassium ion transport	176	-0.305915	-1.29447	sva	0.0450805	0.316979	0.28363
GO:0071805	potassium ion transmembrane transport	176	-0.305915	-1.29447	sva	0.0450805	0.316979	0.28363
GO:0002089	lens morphogenesis in camera-type eye	18	0.538647	1.51038	sva	0.0452212	0.317585	0.284172
GO:0019886	antigen processing and presentation of exogenous peptide antigen via MHC class II	86	-0.359043	-1.36746	sva	0.0455271	0.319348	0.28575
GO:0017121	phospholipid scrambling	10	0.642826	1.53454	sva	0.0456463	0.319799	0.286153
GO:0045776	negative regulation of blood pressure	39	-0.441537	-1.44736	sva	0.0461272	0.321909	0.288041
GO:0006825	copper ion transport	18	0.537452	1.50702	sva	0.0461679	0.321909	0.288041
GO:0030497	fatty acid elongation	10	-0.654676	-1.53645	sva	0.0461687	0.321909	0.288041
GO:0042761	very long-chain fatty acid biosynthetic process	10	-0.654676	-1.53645	sva	0.0461687	0.321909	0.288041
GO:1905517	macrophage migration	29	-0.480368	-1.47547	sva	0.0462381	0.322007	0.288129
GO:0014048	regulation of glutamate secretion	14	-0.594638	-1.52749	sva	0.0463277	0.322246	0.288343
GO:0050852	T cell receptor signaling pathway	167	-0.308571	-1.29681	sva	0.0465242	0.323227	0.28922
GO:0007018	microtubule-based movement	278	0.263777	1.2252	sva	0.0466003	0.323369	0.289348
GO:0009112	nucleobase metabolic process	35	0.438499	1.44598	sva	0.0469047	0.325095	0.290892
GO:2000144	positive regulation of DNA-templated transcription, initiation	28	-0.48468	-1.47634	sva	0.0470083	0.325425	0.291187
GO:0060193	positive regulation of lipase activity	52	-0.40694	-1.41433	sva	0.0471047	0.325705	0.291438
GO:0042771	intrinsic apoptotic signaling pathway in response to DNA damage by p53 class mediator	42	0.414978	1.42487	sva	0.0471856	0.325877	0.291592
GO:1901841	regulation of high voltage-gated calcium channel activity	12	-0.620585	-1.53019	sva	0.0472919	0.326193	0.291875
GO:0032645	regulation of granulocyte macrophage colony-stimulating factor production	10	-0.653084	-1.53271	sva	0.0474419	0.326193	0.291875
GO:0022407	regulation of cell-cell adhesion	313	-0.273797	-1.2371	sva	0.0474521	0.326193	0.291875
GO:0010664	negative regulation of striated muscle cell apoptotic process	22	0.503985	1.48784	sva	0.0474555	0.326193	0.291875
GO:0097062	dendritic spine maintenance	17	-0.560169	-1.51255	sva	0.0475907	0.326737	0.292362
GO:0031018	endocrine pancreas development	39	0.423783	1.43183	sva	0.0477784	0.327099	0.292686
GO:0070997	neuron death	284	-0.278222	-1.24441	sva	0.047797	0.327099	0.292686
GO:0072189	ureter development	11	0.622368	1.52702	sva	0.0478351	0.327099	0.292686
GO:0002065	columnar/cuboidal epithelial cell differentiation	96	0.331367	1.33128	sva	0.0479356	0.327099	0.292686
GO:0030502	negative regulation of bone mineralization	14	0.578447	1.51713	sva	0.0479497	0.327099	0.292686
GO:0002577	regulation of antigen processing and presentation	15	-0.580691	-1.51868	sva	0.0479806	0.327099	0.292686
GO:0000963	mitochondrial RNA processing	15	-0.580623	-1.5185	sva	0.0480466	0.327166	0.292745
GO:0006895	Golgi to endosome transport	17	0.544837	1.5047	sva	0.0481051	0.327182	0.29276
GO:0009746	response to hexose	176	-0.304391	-1.28802	sva	0.0482114	0.327522	0.293064
GO:0021782	glial cell development	87	0.339349	1.34108	sva	0.048294	0.327701	0.293224
GO:0043434	response to peptide hormone	384	-0.264317	-1.21799	sva	0.0484501	0.328156	0.293631
GO:0140053	mitochondrial gene expression	139	-0.319562	-1.31011	sva	0.0485291	0.328156	0.293631
GO:0070076	histone lysine demethylation	25	0.48337	1.47286	sva	0.0485832	0.328156	0.293631
GO:0045667	regulation of osteoblast differentiation	96	0.33101	1.32984	sva	0.0485864	0.328156	0.293631
GO:1901652	response to peptide	440	-0.258806	-1.20732	sva	0.0487181	0.328664	0.294085
GO:1903894	regulation of IRE1-mediated unfolded protein response	14	-0.591196	-1.51865	sva	0.0490159	0.33029	0.29554
GO:0021511	spinal cord patterning	24	0.488715	1.47437	sva	0.049206	0.330943	0.296124
GO:0001773	myeloid dendritic cell activation	25	-0.498246	-1.47895	sva	0.0492612	0.330943	0.296124
GO:0048745	smooth muscle tissue development	19	0.524863	1.4927	sva	0.0492966	0.330943	0.296124
GO:0006907	pinocytosis	18	0.533758	1.49667	sva	0.0493401	0.330943	0.296124
GO:0031348	negative regulation of defense response	150	-0.313755	-1.29994	sva	0.049465	0.331399	0.296533
GO:0051956	negative regulation of amino acid transport	10	-0.650216	-1.52598	sva	0.0497366	0.332488	0.297507
GO:0002791	regulation of peptide secretion	390	-0.263244	-1.21476	sva	0.0497771	0.332488	0.297507
GO:0042755	eating behavior	28	-0.481739	-1.46738	sva	0.049852	0.332488	0.297507
GO:0071622	regulation of granulocyte chemotaxis	35	-0.451447	-1.44619	sva	0.049856	0.332488	0.297507
GO:0038092	nodal signaling pathway	12	-0.616759	-1.52075	sva	0.0502982	0.334568	0.299369
GO:0099590	neurotransmitter receptor internalization	11	-0.632226	-1.5227	sva	0.0503606	0.334568	0.299369
GO:0070661	leukocyte proliferation	225	-0.289226	-1.26095	sva	0.0503943	0.334568	0.299369
GO:0006991	response to sterol depletion	10	-0.64937	-1.524	sva	0.0504254	0.334568	0.299369
GO:0051457	maintenance of protein location in nucleus	21	0.507881	1.4821	sva	0.0505621	0.334568	0.299369
GO:0071715	icosanoid transport	39	-0.437483	-1.43407	sva	0.0505703	0.334568	0.299369
GO:1901571	fatty acid derivative transport	39	-0.437483	-1.43407	sva	0.0505703	0.334568	0.299369
GO:0043302	positive regulation of leukocyte degranulation	18	-0.547533	-1.49951	sva	0.050723	0.335198	0.299932
GO:0007528	neuromuscular junction development	44	-0.422659	-1.421	sva	0.0508207	0.335463	0.300169
GO:0051409	response to nitrosative stress	10	-0.648806	-1.52267	sva	0.0508997	0.335603	0.300295
GO:0070493	thrombin-activated receptor signaling pathway	10	-0.648701	-1.52242	sva	0.0509744	0.335716	0.300396
GO:0035066	positive regulation of histone acetylation	28	0.464689	1.45549	sva	0.0512581	0.336697	0.301274
GO:0048246	macrophage chemotaxis	26	-0.490783	-1.4701	sva	0.0512618	0.336697	0.301274
GO:0042303	molting cycle	87	-0.354131	-1.35138	sva	0.0513678	0.336697	0.301274
GO:0042633	hair cycle	87	-0.354131	-1.35138	sva	0.0513678	0.336697	0.301274
GO:0097756	negative regulation of blood vessel diameter	73	-0.369787	-1.36937	sva	0.0514126	0.336697	0.301274
GO:0014902	myotube differentiation	93	-0.34848	-1.34438	sva	0.0515193	0.336882	0.301439
GO:0010893	positive regulation of steroid biosynthetic process	10	0.63525	1.51646	sva	0.0515564	0.336882	0.301439
GO:0042100	B cell proliferation	70	-0.373402	-1.37257	sva	0.0516439	0.337075	0.301612
GO:0014075	response to amine	36	-0.446204	-1.43833	sva	0.0518136	0.337537	0.302026
GO:0001768	establishment of T cell polarity	10	-0.64756	-1.51975	sva	0.0518364	0.337537	0.302026
GO:0001659	temperature homeostasis	33	-0.457151	-1.44542	sva	0.0519261	0.337537	0.302026
GO:0033127	regulation of histone phosphorylation	12	0.601207	1.51144	sva	0.051957	0.337537	0.302026
GO:0032205	negative regulation of telomere maintenance	32	0.445758	1.44019	sva	0.0520047	0.337537	0.302026
GO:0032060	bleb assembly	11	0.61709	1.51407	sva	0.052132	0.337987	0.302428
GO:0072171	mesonephric tubule morphogenesis	52	0.386345	1.38735	sva	0.0523405	0.338961	0.3033
GO:0031058	positive regulation of histone modification	79	0.345243	1.34159	sva	0.0525246	0.339776	0.304029
GO:0010743	regulation of macrophage derived foam cell differentiation	26	0.473865	1.45779	sva	0.0526172	0.339997	0.304226
GO:0072330	monocarboxylic acid biosynthetic process	248	0.267242	1.22537	sva	0.0526799	0.340025	0.304251
GO:2000403	positive regulation of lymphocyte migration	25	-0.49433	-1.46733	sva	0.0531782	0.342853	0.306782
GO:0031145	anaphase-promoting complex-dependent catabolic process	67	-0.376499	-1.37282	sva	0.053311	0.342853	0.306782
GO:0032436	positive regulation of proteasomal ubiquitin-dependent protein catabolic process	76	-0.365057	-1.36118	sva	0.05335	0.342853	0.306782
GO:1904357	negative regulation of telomere maintenance via telomere lengthening	23	0.490949	1.46552	sva	0.0533536	0.342853	0.306782
GO:0045899	positive regulation of RNA polymerase II transcriptional preinitiation complex assembly	11	-0.628428	-1.51355	sva	0.0535378	0.343474	0.307338
GO:0033158	regulation of protein import into nucleus, translocation	18	-0.544371	-1.49085	sva	0.0535803	0.343474	0.307338
GO:0032276	regulation of gonadotropin secretion	10	-0.645168	-1.51413	sva	0.0536273	0.343474	0.307338
GO:0033005	positive regulation of mast cell activation	15	-0.573962	-1.50108	sva	0.0537479	0.343868	0.30769
GO:0060439	trachea morphogenesis	11	0.615033	1.50903	sva	0.0539765	0.344952	0.30866
GO:0008037	cell recognition	119	-0.327716	-1.31381	sva	0.0540797	0.345232	0.308911
GO:0003012	muscle system process	360	-0.265145	-1.21445	sva	0.0543361	0.346489	0.310036
GO:1901385	regulation of voltage-gated calcium channel activity	35	-0.447485	-1.4335	sva	0.0544199	0.346635	0.310166
GO:0030902	hindbrain development	130	-0.321213	-1.30435	sva	0.0544803	0.346635	0.310166
GO:0003128	heart field specification	11	0.614411	1.5075	sva	0.0545376	0.346635	0.310166
GO:0009125	nucleoside monophosphate catabolic process	10	-0.643882	-1.51112	sva	0.0546703	0.346946	0.310445
GO:0032787	monocarboxylic acid metabolic process	495	0.237529	1.16544	sva	0.0547203	0.346946	0.310445
GO:2000406	positive regulation of T cell migration	20	-0.526505	-1.47988	sva	0.0547653	0.346946	0.310445
GO:1990776	response to angiotensin	21	-0.518357	-1.47457	sva	0.0548822	0.347052	0.310539
GO:0010043	response to zinc ion	46	0.39805	1.39349	sva	0.0549012	0.347052	0.310539
GO:0002822	regulation of adaptive immune response based on somatic recombination of immune receptors built from immunoglobulin superfamily domains	104	-0.337475	-1.32543	sva	0.0550265	0.347416	0.310865
GO:0016048	detection of temperature stimulus	15	-0.572427	-1.49706	sva	0.0550951	0.347416	0.310865
GO:0006458	'de novo' protein folding	47	-0.411921	-1.40294	sva	0.0551886	0.347416	0.310865
GO:0014841	skeletal muscle satellite cell proliferation	13	0.583421	1.49932	sva	0.0551976	0.347416	0.310865
GO:0042089	cytokine biosynthetic process	89	-0.349685	-1.33948	sva	0.0554608	0.348696	0.31201
GO:0034605	cellular response to heat	114	-0.330116	-1.3149	sva	0.0555357	0.348712	0.312025
GO:0032105	negative regulation of response to extracellular stimulus	13	0.582922	1.49804	sva	0.055643	0.348712	0.312025
GO:0032108	negative regulation of response to nutrient levels	13	0.582922	1.49804	sva	0.055643	0.348712	0.312025
GO:0061037	negative regulation of cartilage development	22	0.495366	1.46239	sva	0.0557506	0.348826	0.312126
GO:0034110	regulation of homotypic cell-cell adhesion	21	-0.51734	-1.47168	sva	0.0558265	0.348826	0.312126
GO:0002823	negative regulation of adaptive immune response based on somatic recombination of immune receptors built from immunoglobulin superfamily domains	30	-0.466528	-1.4437	sva	0.0558409	0.348826	0.312126
GO:0042107	cytokine metabolic process	90	-0.348408	-1.33692	sva	0.0561246	0.350222	0.313376
GO:0060761	negative regulation of response to cytokine stimulus	51	0.385717	1.37935	sva	0.0564057	0.351011	0.314082
GO:0050482	arachidonic acid secretion	25	-0.491015	-1.45749	sva	0.0564319	0.351011	0.314082
GO:1903963	arachidonate transport	25	-0.491015	-1.45749	sva	0.0564319	0.351011	0.314082
GO:0070233	negative regulation of T cell apoptotic process	16	0.545501	1.48307	sva	0.0565906	0.351153	0.314209
GO:0071396	cellular response to lipid	497	-0.252138	-1.18821	sva	0.0566223	0.351153	0.314209
GO:0021885	forebrain cell migration	53	-0.397669	-1.38741	sva	0.0566543	0.351153	0.314209
GO:1901018	positive regulation of potassium ion transmembrane transporter activity	21	-0.516524	-1.46936	sva	0.056696	0.351153	0.314209
GO:0048149	behavioral response to ethanol	12	-0.608564	-1.50055	sva	0.0572319	0.354005	0.316761
GO:0048791	calcium ion-regulated exocytosis of neurotransmitter	30	-0.465112	-1.43932	sva	0.0573462	0.354005	0.316761
GO:2000756	regulation of peptidyl-lysine acetylation	56	0.374963	1.36608	sva	0.0573602	0.354005	0.316761
GO:0072676	lymphocyte migration	66	-0.375285	-1.36467	sva	0.0573997	0.354005	0.316761
GO:0090195	chemokine secretion	13	0.580866	1.49275	sva	0.057546	0.354532	0.317232
GO:0071467	cellular response to pH	22	0.493526	1.45696	sva	0.0576658	0.354894	0.317556
GO:0007214	gamma-aminobutyric acid signaling pathway	22	-0.508357	-1.46312	sva	0.0579551	0.355213	0.317842
GO:0006835	dicarboxylic acid transport	80	-0.357501	-1.34513	sva	0.0579666	0.355213	0.317842
GO:0030828	positive regulation of cGMP biosynthetic process	16	-0.558451	-1.48476	sva	0.0579841	0.355213	0.317842
GO:0071772	response to BMP	135	0.301057	1.27513	sva	0.0580227	0.355213	0.317842
GO:0071773	cellular response to BMP stimulus	135	0.301057	1.27513	sva	0.0580227	0.355213	0.317842
GO:0060411	cardiac septum morphogenesis	62	0.364422	1.35413	sva	0.0581377	0.355544	0.318138
GO:0019098	reproductive behavior	26	-0.483883	-1.44944	sva	0.0583655	0.356521	0.319012
GO:0015672	monovalent inorganic cation transport	440	-0.256001	-1.19423	sva	0.0584199	0.356521	0.319012
GO:0045661	regulation of myoblast differentiation	43	0.40325	1.39149	sva	0.0585883	0.357174	0.319596
GO:0009991	response to extracellular stimulus	447	-0.255343	-1.19273	sva	0.0588219	0.358151	0.32047
GO:0035904	aorta development	49	0.388251	1.37712	sva	0.0588961	0.358151	0.32047
GO:1901214	regulation of neuron death	254	-0.279674	-1.23601	sva	0.0589639	0.358151	0.32047
GO:0014002	astrocyte development	29	0.452718	1.42948	sva	0.0589946	0.358151	0.32047
GO:0039694	viral RNA genome replication	22	-0.50718	-1.45974	sva	0.0592687	0.35944	0.321623
GO:0030509	BMP signaling pathway	126	0.30516	1.27973	sva	0.0593688	0.359672	0.321832
GO:0048841	regulation of axon extension involved in axon guidance	26	-0.482711	-1.44593	sva	0.0596252	0.360297	0.32239
GO:1900076	regulation of cellular response to insulin stimulus	62	-0.379857	-1.36559	sva	0.0596377	0.360297	0.32239
GO:2000310	regulation of NMDA receptor activity	18	-0.538096	-1.47367	sva	0.0596576	0.360297	0.32239
GO:0050927	positive regulation of positive chemotaxis	22	-0.50673	-1.45844	sva	0.0597646	0.360569	0.322634
GO:0002227	innate immune response in mucosa	16	-0.556484	-1.47953	sva	0.0598633	0.360791	0.322833
GO:0016311	dephosphorylation	408	-0.258446	-1.19762	sva	0.0601251	0.361994	0.323909
GO:0006415	translational termination	94	-0.342503	-1.32362	sva	0.0604294	0.362438	0.324306
GO:0001503	ossification	324	0.252451	1.19148	sva	0.0605247	0.362438	0.324306
GO:0032331	negative regulation of chondrocyte differentiation	16	0.541273	1.47157	sva	0.0607842	0.362438	0.324306
GO:0045989	positive regulation of striated muscle contraction	14	-0.578008	-1.48478	sva	0.0608015	0.362438	0.324306
GO:0002820	negative regulation of adaptive immune response	31	-0.457816	-1.42719	sva	0.0608886	0.362438	0.324306
GO:0034111	negative regulation of homotypic cell-cell adhesion	12	-0.604381	-1.49023	sva	0.0610342	0.362438	0.324306
GO:0038095	Fc-epsilon receptor signaling pathway	108	-0.331425	-1.30935	sva	0.061104	0.362438	0.324306
GO:0045724	positive regulation of cilium assembly	19	0.512933	1.45877	sva	0.0611387	0.362438	0.324306
GO:0030203	glycosaminoglycan metabolic process	137	-0.314441	-1.28654	sva	0.0611457	0.362438	0.324306
GO:0046500	S-adenosylmethionine metabolic process	12	0.591456	1.48692	sva	0.0611522	0.362438	0.324306
GO:0030148	sphingolipid biosynthetic process	83	-0.35248	-1.33437	sva	0.0611571	0.362438	0.324306
GO:0043547	positive regulation of GTPase activity	341	-0.265434	-1.20936	sva	0.0611683	0.362438	0.324306
GO:1901096	regulation of autophagosome maturation	10	0.624206	1.49009	sva	0.0611687	0.362438	0.324306
GO:0032259	methylation	307	0.254611	1.19486	sva	0.0611735	0.362438	0.324306
GO:0051607	defense response to virus	182	0.281119	1.24084	sva	0.0611744	0.362438	0.324306
GO:0042744	hydrogen peroxide catabolic process	21	0.497506	1.45182	sva	0.0611948	0.362438	0.324306
GO:0048012	hepatocyte growth factor receptor signaling pathway	12	-0.604151	-1.48967	sva	0.061263	0.362473	0.324337
GO:0002042	cell migration involved in sprouting angiogenesis	49	-0.402393	-1.38243	sva	0.0617198	0.364805	0.326424
GO:0035821	modification of morphology or physiology of other organism	128	0.302989	1.27361	sva	0.0618578	0.364973	0.326575
GO:0090196	regulation of chemokine secretion	11	0.606464	1.488	sva	0.0619133	0.364973	0.326575
GO:0032365	intracellular lipid transport	26	0.465356	1.43161	sva	0.0619364	0.364973	0.326575
GO:0030889	negative regulation of B cell proliferation	16	-0.55416	-1.47336	sva	0.0621435	0.365455	0.327006
GO:0046466	membrane lipid catabolic process	23	-0.497955	-1.44876	sva	0.0621436	0.365455	0.327006
GO:0030517	negative regulation of axon extension	32	-0.452103	-1.41967	sva	0.0625772	0.367461	0.328801
GO:0009048	dosage compensation by inactivation of X chromosome	11	0.605717	1.48617	sva	0.0626111	0.367461	0.328801
GO:0006568	tryptophan metabolic process	10	0.622611	1.48629	sva	0.0627545	0.367839	0.329139
GO:0051412	response to corticosterone	18	-0.53499	-1.46516	sva	0.0628042	0.367839	0.329139
GO:0060307	regulation of ventricular cardiac muscle cell membrane repolarization	21	0.495965	1.44732	sva	0.062865	0.367839	0.329139
GO:0003044	regulation of systemic arterial blood pressure mediated by a chemical signal	43	-0.415938	-1.39182	sva	0.063297	0.369995	0.331068
GO:0015696	ammonium transport	84	-0.350124	-1.32826	sva	0.0635067	0.3706	0.33161
GO:0000478	endonucleolytic cleavage involved in rRNA processing	13	0.574591	1.47663	sva	0.0635914	0.3706	0.33161
GO:0000479	endonucleolytic cleavage of tricistronic rRNA transcript (SSU-rRNA, 5.8S rRNA, LSU-rRNA)	13	0.574591	1.47663	sva	0.0635914	0.3706	0.33161
GO:1903053	regulation of extracellular matrix organization	30	0.444334	1.41422	sva	0.0636676	0.370673	0.331675
GO:0007178	transmembrane receptor protein serine/threonine kinase signaling pathway	273	-0.274636	-1.2233	sva	0.0637864	0.370994	0.331962
GO:0001819	positive regulation of cytokine production	341	-0.264646	-1.20577	sva	0.0639643	0.371288	0.332226
GO:0043161	proteasome-mediated ubiquitin-dependent protein catabolic process	359	-0.262446	-1.20177	sva	0.0640116	0.371288	0.332226
GO:0048706	embryonic skeletal system development	106	-0.331429	-1.30559	sva	0.0640284	0.371288	0.332226
GO:0060041	retina development in camera-type eye	123	-0.320522	-1.29112	sva	0.0642525	0.372033	0.332891
GO:2001025	positive regulation of response to drug	23	-0.49597	-1.44299	sva	0.0642846	0.372033	0.332891
GO:0000186	activation of MAPKK activity	50	0.38242	1.36222	sva	0.0644485	0.372611	0.333409
GO:0051048	negative regulation of secretion	173	-0.298315	-1.25965	sva	0.0649673	0.375238	0.335759
GO:0042176	regulation of protein catabolic process	322	-0.266857	-1.20907	sva	0.0652074	0.376251	0.336666
GO:0046467	membrane lipid biosynthetic process	120	-0.321679	-1.29116	sva	0.0653035	0.376255	0.33667
GO:0001708	cell fate specification	76	0.341583	1.31846	sva	0.0653373	0.376255	0.33667
GO:0034284	response to monosaccharide	180	-0.2958	-1.25537	sva	0.0655677	0.377209	0.337523
GO:0035735	intraciliary transport involved in cilium assembly	34	0.426583	1.39757	sva	0.0657791	0.377488	0.337773
GO:0042110	T cell activation	377	-0.259973	-1.19582	sva	0.065789	0.377488	0.337773
GO:0031670	cellular response to nutrient	55	-0.387852	-1.36315	sva	0.0659152	0.377488	0.337773
GO:0032332	positive regulation of chondrocyte differentiation	16	0.53629	1.45803	sva	0.0659328	0.377488	0.337773
GO:0001710	mesodermal cell fate commitment	18	0.517172	1.45016	sva	0.0659405	0.377488	0.337773
GO:0034314	Arp2/3 complex-mediated actin nucleation	31	-0.453406	-1.41344	sva	0.0663132	0.379249	0.339349
GO:0014857	regulation of skeletal muscle cell proliferation	13	0.571723	1.46926	sva	0.0664264	0.379523	0.339594
GO:0030168	platelet activation	138	-0.311652	-1.27647	sva	0.066512	0.379622	0.339682
GO:0060009	Sertoli cell development	13	0.571491	1.46866	sva	0.0666337	0.379622	0.339682
GO:0002706	regulation of lymphocyte mediated immunity	105	-0.330873	-1.30146	sva	0.0666392	0.379622	0.339682
GO:1904951	positive regulation of establishment of protein localization	405	-0.256999	-1.19015	sva	0.0667265	0.379747	0.339794
GO:1903845	negative regulation of cellular response to transforming growth factor beta stimulus	66	-0.369571	-1.34389	sva	0.0668015	0.379803	0.339844
GO:0090092	regulation of transmembrane receptor protein serine/threonine kinase signaling pathway	186	-0.293496	-1.25061	sva	0.0669075	0.380035	0.340052
GO:0045834	positive regulation of lipid metabolic process	110	-0.327199	-1.29616	sva	0.0671563	0.380185	0.340186
GO:0031573	intra-S DNA damage checkpoint	10	0.618155	1.47565	sva	0.0671764	0.380185	0.340186
GO:0006486	protein glycosylation	222	-0.28378	-1.23536	sva	0.0671951	0.380185	0.340186
GO:0043413	macromolecule glycosylation	222	-0.28378	-1.23536	sva	0.0671951	0.380185	0.340186
GO:0051261	protein depolymerization	94	-0.33897	-1.30997	sva	0.0672819	0.380306	0.340294
GO:0045860	positive regulation of protein kinase activity	460	-0.252207	-1.18094	sva	0.0673855	0.380522	0.340488
GO:0086013	membrane repolarization during cardiac muscle cell action potential	22	0.484903	1.4315	sva	0.0674595	0.380571	0.340532
GO:0048169	regulation of long-term neuronal synaptic plasticity	25	-0.48114	-1.42817	sva	0.0677065	0.381186	0.341082
GO:1900180	regulation of protein localization to nucleus	94	-0.338753	-1.30913	sva	0.0677434	0.381186	0.341082
GO:0050863	regulation of T cell activation	265	-0.274854	-1.22034	sva	0.0677649	0.381186	0.341082
GO:0090197	positive regulation of chemokine secretion	10	0.617429	1.47392	sva	0.0678433	0.381258	0.341146
GO:0045740	positive regulation of DNA replication	51	-0.394024	-1.36436	sva	0.0682606	0.383234	0.342914
GO:0030852	regulation of granulocyte differentiation	14	-0.569993	-1.46419	sva	0.0688895	0.386234	0.345598
GO:0060768	regulation of epithelial cell proliferation involved in prostate gland development	10	0.61635	1.47134	sva	0.0689432	0.386234	0.345598
GO:0006048	UDP-N-acetylglucosamine biosynthetic process	10	0.61629	1.4712	sva	0.068994	0.386234	0.345598
GO:0051955	regulation of amino acid transport	29	-0.460036	-1.41301	sva	0.0691287	0.386616	0.345941
GO:0014897	striated muscle hypertrophy	66	-0.368043	-1.33834	sva	0.0695199	0.388431	0.347565
GO:0031396	regulation of protein ubiquitination	154	-0.303292	-1.26108	sva	0.0698265	0.38977	0.348763
GO:1903421	regulation of synaptic vesicle recycling	14	-0.568671	-1.46079	sva	0.0702997	0.392035	0.35079
GO:0045907	positive regulation of vasoconstriction	30	-0.454191	-1.40552	sva	0.0708136	0.394523	0.353016
GO:0090646	mitochondrial tRNA processing	12	-0.594165	-1.46504	sva	0.0710054	0.395214	0.353634
GO:0014896	muscle hypertrophy	68	-0.364458	-1.33263	sva	0.0712422	0.39546	0.353854
GO:0030856	regulation of epithelial cell differentiation	125	0.300861	1.26017	sva	0.0712603	0.39546	0.353854
GO:0006555	methionine metabolic process	15	0.541937	1.44823	sva	0.0713427	0.39546	0.353854
GO:0003300	cardiac muscle hypertrophy	65	-0.368441	-1.33624	sva	0.0713948	0.39546	0.353854
GO:2001234	negative regulation of apoptotic signaling pathway	189	-0.291044	-1.24262	sva	0.0714051	0.39546	0.353854
GO:0016577	histone demethylation	27	0.452868	1.40592	sva	0.0714575	0.39546	0.353854
GO:0001525	angiogenesis	427	-0.253942	-1.18157	sva	0.0715252	0.39546	0.353854
GO:0046686	response to cadmium ion	53	0.371916	1.34055	sva	0.0716933	0.396014	0.354349
GO:0046597	negative regulation of viral entry into host cell	16	0.530873	1.4433	sva	0.0717985	0.396219	0.354533
GO:0042634	regulation of hair cycle	21	-0.502829	-1.4304	sva	0.0718877	0.396335	0.354637
GO:0050796	regulation of insulin secretion	155	-0.302139	-1.25739	sva	0.0719969	0.396553	0.354832
GO:0032196	transposition	19	0.50325	1.43123	sva	0.0720635	0.396553	0.354832
GO:0002902	regulation of B cell apoptotic process	17	-0.534796	-1.44404	sva	0.0725018	0.398589	0.356654
GO:0030888	regulation of B cell proliferation	53	-0.387491	-1.3519	sva	0.0726139	0.398596	0.35666
GO:0045109	intermediate filament organization	18	0.511286	1.43366	sva	0.07264	0.398596	0.35666
GO:1900363	regulation of mRNA polyadenylation	11	0.595676	1.46153	sva	0.0727473	0.39869	0.356744
GO:0070986	left/right axis specification	13	0.565666	1.45369	sva	0.0727941	0.39869	0.356744
GO:0036124	histone H3-K9 trimethylation	14	0.552682	1.44955	sva	0.0729093	0.398786	0.35683
GO:0062014	negative regulation of small molecule metabolic process	101	-0.330966	-1.29394	sva	0.0729486	0.398786	0.35683
GO:0051782	negative regulation of cell division	13	0.565254	1.45263	sva	0.0732088	0.399467	0.357439
GO:0006658	phosphatidylserine metabolic process	24	-0.482518	-1.41841	sva	0.0732105	0.399467	0.357439
GO:0033008	positive regulation of mast cell activation involved in immune response	12	-0.591867	-1.45938	sva	0.0734542	0.399467	0.357439
GO:0043306	positive regulation of mast cell degranulation	12	-0.591867	-1.45938	sva	0.0734542	0.399467	0.357439
GO:0071071	regulation of phospholipid biosynthetic process	12	-0.591836	-1.4593	sva	0.0734953	0.399467	0.357439
GO:0045861	negative regulation of proteolysis	281	0.255303	1.18706	sva	0.0736551	0.399467	0.357439
GO:0030514	negative regulation of BMP signaling pathway	40	0.401476	1.36395	sva	0.0737046	0.399467	0.357439
GO:0010769	regulation of cell morphogenesis involved in differentiation	252	-0.275401	-1.21601	sva	0.0737979	0.399467	0.357439
GO:0035563	positive regulation of chromatin binding	11	0.594649	1.45901	sva	0.0738083	0.399467	0.357439
GO:0045123	cellular extravasation	39	-0.419922	-1.37651	sva	0.0738231	0.399467	0.357439
GO:2000758	positive regulation of peptidyl-lysine acetylation	29	0.441142	1.39292	sva	0.0738279	0.399467	0.357439
GO:0001959	regulation of cytokine-mediated signaling pathway	145	0.290264	1.24229	sva	0.0739002	0.399487	0.357457
GO:0050951	sensory perception of temperature stimulus	16	-0.543099	-1.44395	sva	0.0740813	0.399939	0.357862
GO:0008299	isoprenoid biosynthetic process	27	-0.465646	-1.40693	sva	0.0741214	0.399939	0.357862
GO:0072283	metanephric renal vesicle morphogenesis	14	0.551548	1.44658	sva	0.0742141	0.400069	0.357978
GO:0045746	negative regulation of Notch signaling pathway	32	-0.443308	-1.39205	sva	0.0744972	0.400619	0.35847
GO:0031629	synaptic vesicle fusion to presynaptic active zone membrane	15	-0.553198	-1.44677	sva	0.0745226	0.400619	0.35847
GO:0099500	vesicle fusion to plasma membrane	15	-0.553198	-1.44677	sva	0.0745226	0.400619	0.35847
GO:0071241	cellular response to inorganic substance	158	-0.300069	-1.25219	sva	0.0746888	0.40083	0.358659
GO:0001558	regulation of cell growth	352	-0.260534	-1.19078	sva	0.0746995	0.40083	0.358659
GO:0009200	deoxyribonucleoside triphosphate metabolic process	16	-0.542397	-1.44208	sva	0.074926	0.401675	0.359415
GO:0021514	ventral spinal cord interneuron differentiation	16	0.528004	1.4355	sva	0.0751303	0.4024	0.360064
GO:0050926	regulation of positive chemotaxis	23	-0.48688	-1.41654	sva	0.0752934	0.402903	0.360514
GO:0000732	strand displacement	24	0.466086	1.4061	sva	0.0755035	0.403386	0.360946
GO:1904294	positive regulation of ERAD pathway	13	0.563364	1.44778	sva	0.0755223	0.403386	0.360946
GO:0001666	response to hypoxia	305	-0.266251	-1.19985	sva	0.0759494	0.405295	0.362655
GO:1901998	toxin transport	35	-0.431198	-1.38133	sva	0.0760666	0.405521	0.362856
GO:0035296	regulation of tube diameter	113	-0.321444	-1.2787	sva	0.0762465	0.405521	0.362856
GO:0097746	regulation of blood vessel diameter	113	-0.321444	-1.2787	sva	0.0762465	0.405521	0.362856
GO:0040036	regulation of fibroblast growth factor receptor signaling pathway	23	-0.486155	-1.41443	sva	0.0762702	0.405521	0.362856
GO:0009584	detection of visible light	41	-0.412477	-1.36665	sva	0.0764579	0.405728	0.363042
GO:0021521	ventral spinal cord interneuron specification	10	0.609079	1.45398	sva	0.0765183	0.405728	0.363042
GO:0060573	cell fate specification involved in pattern specification	10	0.609079	1.45398	sva	0.0765183	0.405728	0.363042
GO:0031032	actomyosin structure organization	164	0.281923	1.22744	sva	0.0767238	0.406367	0.363613
GO:0006482	protein demethylation	28	0.443869	1.39028	sva	0.0768987	0.406367	0.363613
GO:0008214	protein dealkylation	28	0.443869	1.39028	sva	0.0768987	0.406367	0.363613
GO:0032729	positive regulation of interferon-gamma production	52	-0.386855	-1.34453	sva	0.0769179	0.406367	0.363613
GO:0072074	kidney mesenchyme development	18	0.507597	1.42331	sva	0.0770765	0.406836	0.364033
GO:0046337	phosphatidylethanolamine metabolic process	17	0.51649	1.42642	sva	0.0774043	0.408196	0.36525
GO:0006775	fat-soluble vitamin metabolic process	36	-0.426724	-1.37554	sva	0.077742	0.409606	0.366511
GO:0090278	negative regulation of peptide hormone secretion	39	-0.417252	-1.36776	sva	0.0779795	0.410485	0.367299
GO:0003337	mesenchymal to epithelial transition involved in metanephros morphogenesis	13	0.560965	1.44161	sva	0.0781601	0.411064	0.367817
GO:0003401	axis elongation	28	0.442877	1.38717	sva	0.078286	0.411355	0.368077
GO:0051187	cofactor catabolic process	44	0.387838	1.34479	sva	0.0787089	0.413204	0.369731
GO:0071295	cellular response to vitamin	26	-0.467135	-1.39927	sva	0.0788774	0.413716	0.370189
GO:0050855	regulation of B cell receptor signaling pathway	18	-0.520674	-1.42595	sva	0.0789948	0.413825	0.370287
GO:0060688	regulation of morphogenesis of a branching structure	46	0.382724	1.33984	sva	0.0790751	0.413825	0.370287
GO:0060292	long term synaptic depression	26	-0.466958	-1.39874	sva	0.0791115	0.413825	0.370287
GO:1904037	positive regulation of epithelial cell apoptotic process	23	0.468872	1.39962	sva	0.0792472	0.414163	0.370589
GO:1903725	regulation of phospholipid metabolic process	63	-0.367143	-1.32385	sva	0.0796467	0.415566	0.371845
GO:0045662	negative regulation of myoblast differentiation	21	0.481959	1.40645	sva	0.0796585	0.415566	0.371845
GO:0032651	regulation of interleukin-1 beta production	50	-0.38913	-1.34228	sva	0.0798961	0.416432	0.37262
GO:1903037	regulation of leukocyte cell-cell adhesion	244	-0.275183	-1.21074	sva	0.0801315	0.417202	0.373308
GO:0030859	polarized epithelial cell differentiation	15	-0.548267	-1.43388	sva	0.080187	0.417202	0.373308
GO:0042476	odontogenesis	102	0.311594	1.26436	sva	0.0804803	0.418123	0.374132
GO:0051898	negative regulation of protein kinase B signaling	44	0.386811	1.34123	sva	0.0805927	0.418123	0.374132
GO:0007019	microtubule depolymerization	36	-0.424937	-1.36978	sva	0.0806384	0.418123	0.374132
GO:0043112	receptor metabolic process	153	-0.299903	-1.24592	sva	0.0806513	0.418123	0.374132
GO:0048016	inositol phosphate-mediated signaling	35	-0.428179	-1.37165	sva	0.0809128	0.419105	0.375012
GO:0032611	interleukin-1 beta production	59	-0.372278	-1.32606	sva	0.0812456	0.420159	0.375955
GO:0051797	regulation of hair follicle development	14	-0.558814	-1.43547	sva	0.0812606	0.420159	0.375955
GO:0021978	telencephalon regionalization	11	0.587551	1.4416	sva	0.0815513	0.421223	0.376907
GO:0043543	protein acylation	209	0.267244	1.20071	sva	0.0816739	0.421223	0.376907
GO:0031341	regulation of cell killing	59	-0.371978	-1.325	sva	0.0818378	0.421223	0.376907
GO:0048814	regulation of dendrite morphogenesis	75	-0.350748	-1.30489	sva	0.0819097	0.421223	0.376907
GO:0035176	social behavior	47	-0.394599	-1.34395	sva	0.0819352	0.421223	0.376907
GO:0051703	intraspecies interaction between organisms	47	-0.394599	-1.34395	sva	0.0819352	0.421223	0.376907
GO:0006883	cellular sodium ion homeostasis	14	0.544792	1.42886	sva	0.0819728	0.421223	0.376907
GO:0090189	regulation of branching involved in ureteric bud morphogenesis	19	0.495243	1.40846	sva	0.082073	0.421249	0.37693
GO:0072148	epithelial cell fate commitment	16	0.52236	1.42015	sva	0.0821225	0.421249	0.37693
GO:1905475	regulation of protein localization to membrane	145	-0.302538	-1.24764	sva	0.0824785	0.421876	0.377491
GO:0086011	membrane repolarization during action potential	25	0.455257	1.38719	sva	0.082481	0.421876	0.377491
GO:0007045	cell-substrate adherens junction assembly	68	0.343184	1.29763	sva	0.0825347	0.421876	0.377491
GO:0048041	focal adhesion assembly	68	0.343184	1.29763	sva	0.0825347	0.421876	0.377491
GO:0010038	response to metal ion	292	-0.266421	-1.1951	sva	0.0827623	0.422668	0.3782
GO:1905332	positive regulation of morphogenesis of an epithelium	27	0.444676	1.38049	sva	0.0831002	0.424022	0.379411
GO:0021955	central nervous system neuron axonogenesis	29	-0.449806	-1.38159	sva	0.0833302	0.424721	0.380037
GO:0006855	drug transmembrane transport	74	0.335315	1.28797	sva	0.0833831	0.424721	0.380037
GO:0051651	maintenance of location in cell	83	0.326026	1.27801	sva	0.0836456	0.425686	0.3809
GO:0002026	regulation of the force of heart contraction	24	0.459996	1.38773	sva	0.0837651	0.425922	0.381111
GO:0051567	histone H3-K9 methylation	28	0.43916	1.37553	sva	0.0838563	0.426013	0.381193
GO:0014874	response to stimulus involved in regulation of muscle adaptation	13	0.555466	1.42748	sva	0.0844499	0.428655	0.383557
GO:0002347	response to tumor cell	20	0.485882	1.40066	sva	0.0845414	0.428746	0.383638
GO:0006817	phosphate ion transport	17	0.510632	1.41024	sva	0.0846949	0.42915	0.384
GO:0007044	cell-substrate junction assembly	82	0.326377	1.27648	sva	0.0849559	0.430098	0.384848
GO:0001101	response to acid chemical	292	-0.265838	-1.19248	sva	0.0850791	0.430348	0.385071
GO:0019884	antigen processing and presentation of exogenous antigen	154	-0.297979	-1.23899	sva	0.085404	0.431616	0.386206
GO:0061311	cell surface receptor signaling pathway involved in heart development	21	0.477723	1.39409	sva	0.0855395	0.431926	0.386484
GO:0009409	response to cold	43	0.386549	1.33387	sva	0.0856403	0.432061	0.386604
GO:0061041	regulation of wound healing	104	-0.323409	-1.27018	sva	0.0859869	0.433147	0.387576
GO:0014842	regulation of skeletal muscle satellite cell proliferation	12	0.568414	1.42899	sva	0.0860044	0.433147	0.387576
GO:0010826	negative regulation of centrosome duplication	11	0.583324	1.43123	sva	0.0864297	0.433823	0.388181
GO:1904707	positive regulation of vascular smooth muscle cell proliferation	23	-0.478661	-1.39263	sva	0.086522	0.433823	0.388181
GO:0034440	lipid oxidation	87	0.321083	1.2689	sva	0.086585	0.433823	0.388181
GO:0042475	odontogenesis of dentin-containing tooth	69	0.34007	1.28943	sva	0.0867367	0.433823	0.388181
GO:0032370	positive regulation of lipid transport	50	-0.385505	-1.32978	sva	0.08677	0.433823	0.388181
GO:0043268	positive regulation of potassium ion transport	38	-0.414784	-1.35251	sva	0.0868804	0.433823	0.388181
GO:0070372	regulation of ERK1 and ERK2 cascade	257	-0.271037	-1.19936	sva	0.0869134	0.433823	0.388181
GO:0032507	maintenance of protein location in cell	69	0.339985	1.28911	sva	0.0869379	0.433823	0.388181
GO:0010881	regulation of cardiac muscle contraction by regulation of the release of sequestered calcium ion	18	0.499794	1.40143	sva	0.0869711	0.433823	0.388181
GO:0009583	detection of light stimulus	52	-0.381404	-1.32558	sva	0.0871206	0.433823	0.388181
GO:0071377	cellular response to glucagon stimulus	33	-0.431084	-1.363	sva	0.0872408	0.433823	0.388181
GO:0010884	positive regulation of lipid storage	17	0.50863	1.40471	sva	0.0872758	0.433823	0.388181
GO:1904589	regulation of protein import	52	-0.381263	-1.32509	sva	0.0874077	0.433823	0.388181
GO:0035883	enteroendocrine cell differentiation	21	0.476309	1.38996	sva	0.0874957	0.433823	0.388181
GO:2000780	negative regulation of double-strand break repair	22	-0.484109	-1.39333	sva	0.0876038	0.433823	0.388181
GO:0060973	cell migration involved in heart development	15	0.528537	1.41242	sva	0.0876258	0.433823	0.388181
GO:0002438	acute inflammatory response to antigenic stimulus	18	-0.513906	-1.40742	sva	0.0876554	0.433823	0.388181
GO:0033160	positive regulation of protein import into nucleus, translocation	11	-0.594526	-1.4319	sva	0.0877888	0.433823	0.388181
GO:0007617	mating behavior	18	-0.513718	-1.4069	sva	0.0879313	0.433823	0.388181
GO:0043951	negative regulation of cAMP-mediated signaling	13	-0.565323	-1.42437	sva	0.0879494	0.433823	0.388181
GO:0090288	negative regulation of cellular response to growth factor stimulus	119	-0.313512	-1.25686	sva	0.0879634	0.433823	0.388181
GO:0061337	cardiac conduction	130	-0.307529	-1.24878	sva	0.0880089	0.433823	0.388181
GO:0071599	otic vesicle development	13	0.552566	1.42003	sva	0.0880238	0.433823	0.388181
GO:0048665	neuron fate specification	27	0.441285	1.36996	sva	0.0882463	0.433823	0.388181
GO:0090398	cellular senescence	58	-0.370383	-1.31485	sva	0.0884033	0.433823	0.388181
GO:0060026	convergent extension	14	0.539619	1.41529	sva	0.0884082	0.433823	0.388181
GO:0095500	acetylcholine receptor signaling pathway	20	-0.497389	-1.39804	sva	0.0885322	0.433823	0.388181
GO:1903831	signal transduction involved in cellular response to ammonium ion	20	-0.497389	-1.39804	sva	0.0885322	0.433823	0.388181
GO:1905144	response to acetylcholine	20	-0.497389	-1.39804	sva	0.0885322	0.433823	0.388181
GO:1905145	cellular response to acetylcholine	20	-0.497389	-1.39804	sva	0.0885322	0.433823	0.388181
GO:0099632	protein transport within plasma membrane	19	-0.504825	-1.40135	sva	0.088763	0.433823	0.388181
GO:0099637	neurotransmitter receptor transport	19	-0.504825	-1.40135	sva	0.088763	0.433823	0.388181
GO:0001974	blood vessel remodeling	36	0.405018	1.34406	sva	0.0887678	0.433823	0.388181
GO:0006305	DNA alkylation	53	0.363067	1.30865	sva	0.0888027	0.433823	0.388181
GO:0006306	DNA methylation	53	0.363067	1.30865	sva	0.0888027	0.433823	0.388181
GO:0033622	integrin activation	14	-0.552473	-1.41918	sva	0.0889906	0.433823	0.388181
GO:0010818	T cell chemotaxis	15	-0.541059	-1.41503	sva	0.0890136	0.433823	0.388181
GO:0030149	sphingolipid catabolic process	20	-0.496959	-1.39683	sva	0.0890687	0.433823	0.388181
GO:0010611	regulation of cardiac muscle hypertrophy	44	-0.397558	-1.3366	sva	0.0891398	0.433823	0.388181
GO:0033189	response to vitamin A	16	-0.530705	-1.41099	sva	0.0891498	0.433823	0.388181
GO:0010721	negative regulation of cell development	276	-0.267248	-1.19179	sva	0.0891999	0.433823	0.388181
GO:0021952	central nervous system projection neuron axonogenesis	23	-0.47676	-1.3871	sva	0.0892842	0.433823	0.388181
GO:1903052	positive regulation of proteolysis involved in cellular protein catabolic process	110	-0.318311	-1.26095	sva	0.0893428	0.433823	0.388181
GO:0051546	keratinocyte migration	10	-0.609499	-1.43042	sva	0.0894759	0.434107	0.388435
GO:2000249	regulation of actin cytoskeleton reorganization	33	-0.42957	-1.35822	sva	0.0896836	0.434753	0.389013
GO:0071248	cellular response to metal ion	137	-0.303642	-1.24235	sva	0.089897	0.435425	0.389614
GO:0030512	negative regulation of transforming growth factor beta receptor signaling pathway	64	-0.360445	-1.30365	sva	0.0904404	0.437692	0.391643
GO:0060759	regulation of response to cytokine stimulus	152	0.282089	1.21535	sva	0.0907761	0.438827	0.392658
GO:0042306	regulation of protein import into nucleus	48	-0.387513	-1.32555	sva	0.0908589	0.438827	0.392658
GO:0046888	negative regulation of hormone secretion	56	-0.372493	-1.31356	sva	0.0909009	0.438827	0.392658
GO:0051225	spindle assembly	92	0.314974	1.2565	sva	0.0916177	0.441138	0.394726
GO:0032515	negative regulation of phosphoprotein phosphatase activity	42	-0.401033	-1.33551	sva	0.0916183	0.441138	0.394726
GO:0090178	regulation of establishment of planar polarity involved in neural tube closure	12	0.563647	1.41701	sva	0.0917376	0.441138	0.394726
GO:0001578	microtubule bundle formation	76	0.329791	1.27294	sva	0.091881	0.441138	0.394726
GO:0048002	antigen processing and presentation of peptide antigen	162	-0.293074	-1.22695	sva	0.0918852	0.441138	0.394726
GO:0014743	regulation of muscle hypertrophy	46	-0.391458	-1.32765	sva	0.0919043	0.441138	0.394726
GO:0045165	cell fate commitment	220	0.262265	1.18569	sva	0.09191	0.441138	0.394726
GO:0001655	urogenital system development	276	0.251803	1.16858	sva	0.0921866	0.442101	0.395588
GO:0007191	adenylate cyclase-activating dopamine receptor signaling pathway	10	-0.60711	-1.42482	sva	0.0923334	0.44244	0.395892
GO:0070664	negative regulation of leukocyte proliferation	67	-0.355537	-1.29639	sva	0.0926124	0.443412	0.396761
GO:0070482	response to oxygen levels	333	-0.258703	-1.17607	sva	0.0928182	0.444032	0.397316
GO:0009416	response to light stimulus	259	-0.269215	-1.19233	sva	0.093018	0.444359	0.397608
GO:0048863	stem cell differentiation	234	-0.273849	-1.19944	sva	0.093039	0.444359	0.397608
GO:0045185	maintenance of protein location	98	0.309828	1.24889	sva	0.0932346	0.444369	0.397618
GO:0071605	monocyte chemotactic protein-1 production	14	0.535682	1.40496	sva	0.0934154	0.444369	0.397618
GO:0071637	regulation of monocyte chemotactic protein-1 production	14	0.535682	1.40496	sva	0.0934154	0.444369	0.397618
GO:0015849	organic acid transport	263	-0.268407	-1.19069	sva	0.0934229	0.444369	0.397618
GO:0046942	carboxylic acid transport	263	-0.268407	-1.19069	sva	0.0934229	0.444369	0.397618
GO:0032309	icosanoid secretion	36	-0.416928	-1.34396	sva	0.0939388	0.445704	0.398812
GO:0070371	ERK1 and ERK2 cascade	271	-0.266948	-1.18807	sva	0.0940521	0.445704	0.398812
GO:0070265	necrotic cell death	38	0.395762	1.32929	sva	0.094088	0.445704	0.398812
GO:0008038	neuron recognition	30	-0.438657	-1.35745	sva	0.0941039	0.445704	0.398812
GO:0002449	lymphocyte mediated immunity	180	-0.286766	-1.21703	sva	0.0941802	0.445704	0.398812
GO:0036151	phosphatidylcholine acyl-chain remodeling	23	-0.473485	-1.37757	sva	0.0942008	0.445704	0.398812
GO:0045176	apical protein localization	10	-0.605486	-1.42101	sva	0.0942935	0.445704	0.398812
GO:0043647	inositol phosphate metabolic process	58	-0.367599	-1.30497	sva	0.0944525	0.445704	0.398812
GO:0001910	regulation of leukocyte mediated cytotoxicity	51	-0.379678	-1.31469	sva	0.094529	0.445704	0.398812
GO:0046651	lymphocyte proliferation	211	-0.278465	-1.20494	sva	0.0945306	0.445704	0.398812
GO:0035065	regulation of histone acetylation	51	0.364311	1.3028	sva	0.0946894	0.445704	0.398812
GO:0032943	mononuclear cell proliferation	213	-0.277959	-1.20409	sva	0.0946966	0.445704	0.398812
GO:0051592	response to calcium ion	109	-0.316976	-1.25406	sva	0.0946987	0.445704	0.398812
GO:0036293	response to decreased oxygen levels	312	-0.260889	-1.17833	sva	0.0948872	0.446138	0.399201
GO:0001825	blastocyst formation	27	-0.451399	-1.36388	sva	0.0949443	0.446138	0.399201
GO:0033108	mitochondrial respiratory chain complex assembly	76	-0.343785	-1.28187	sva	0.0952621	0.44716	0.400115
GO:0071385	cellular response to glucocorticoid stimulus	57	-0.368755	-1.30473	sva	0.0953735	0.44716	0.400115
GO:0007229	integrin-mediated signaling pathway	87	0.317799	1.25592	sva	0.0953921	0.44716	0.400115
GO:0006206	pyrimidine nucleobase metabolic process	15	0.522408	1.39604	sva	0.0956674	0.447633	0.400538
GO:0032652	regulation of interleukin-1 production	62	-0.360964	-1.29767	sva	0.0957195	0.447633	0.400538
GO:0051058	negative regulation of small GTPase mediated signal transduction	47	-0.387318	-1.31915	sva	0.0957236	0.447633	0.400538
GO:0035335	peptidyl-tyrosine dephosphorylation	90	-0.330191	-1.26701	sva	0.096102	0.448574	0.40138
GO:1902074	response to salt	17	-0.516047	-1.39341	sva	0.096132	0.448574	0.40138
GO:0044849	estrous cycle	12	-0.572602	-1.41187	sva	0.0962288	0.448574	0.40138
GO:0036150	phosphatidylserine acyl-chain remodeling	18	-0.50758	-1.39009	sva	0.0962331	0.448574	0.40138
GO:0090179	planar cell polarity pathway involved in neural tube closure	11	0.575157	1.41119	sva	0.0964048	0.448745	0.401533
GO:0002922	positive regulation of humoral immune response	12	-0.572391	-1.41135	sva	0.096487	0.448745	0.401533
GO:1903364	positive regulation of cellular protein catabolic process	127	-0.306339	-1.23983	sva	0.096501	0.448745	0.401533
GO:0050706	regulation of interleukin-1 beta secretion	31	-0.432989	-1.34979	sva	0.0967811	0.449689	0.402377
GO:0032760	positive regulation of tumor necrosis factor production	56	-0.369643	-1.30351	sva	0.0970551	0.449909	0.402574
GO:0060977	coronary vasculature morphogenesis	14	0.53308	1.39814	sva	0.0971301	0.449909	0.402574
GO:0032434	regulation of proteasomal ubiquitin-dependent protein catabolic process	111	-0.314984	-1.24951	sva	0.0971364	0.449909	0.402574
GO:2000050	regulation of non-canonical Wnt signaling pathway	19	0.48443	1.37771	sva	0.0971496	0.449909	0.402574
GO:0042573	retinoic acid metabolic process	16	-0.524652	-1.3949	sva	0.0972149	0.449909	0.402574
GO:0010092	specification of animal organ identity	28	0.430827	1.34943	sva	0.0973682	0.45026	0.402889
GO:0006004	fucose metabolic process	15	-0.534462	-1.39777	sva	0.0974889	0.45046	0.403068
GO:1903362	regulation of cellular protein catabolic process	213	-0.277185	-1.20073	sva	0.0977902	0.451291	0.403811
GO:0006684	sphingomyelin metabolic process	14	-0.545582	-1.40148	sva	0.0978236	0.451291	0.403811
GO:0048532	anatomical structure arrangement	14	-0.545328	-1.40083	sva	0.0981718	0.452149	0.404579
GO:0086004	regulation of cardiac muscle cell contraction	34	0.406424	1.33153	sva	0.0981935	0.452149	0.404579
GO:0018105	peptidyl-serine phosphorylation	252	-0.269144	-1.18838	sva	0.0982426	0.452149	0.404579
GO:0071322	cellular response to carbohydrate stimulus	115	-0.31204	-1.24466	sva	0.0987729	0.45423	0.406441
GO:0009886	post-embryonic animal morphogenesis	12	0.557549	1.40168	sva	0.0993839	0.45668	0.408633
GO:0043500	muscle adaptation	79	-0.338928	-1.27243	sva	0.0996773	0.457365	0.409246
GO:0031290	retinal ganglion cell axon guidance	19	-0.497045	-1.37976	sva	0.0996901	0.457365	0.409246
GO:0009749	response to glucose	172	-0.287538	-1.21316	sva	0.0998253	0.457501	0.409368
GO:0007162	negative regulation of cell adhesion	221	-0.274867	-1.19595	sva	0.0999267	0.457501	0.409368
GO:0048535	lymph node development	14	-0.544029	-1.39749	sva	0.099971	0.457501	0.409368
GO:0009268	response to pH	40	0.386957	1.31463	sva	0.100061	0.457501	0.409368
GO:0034308	primary alcohol metabolic process	48	0.367688	1.2988	sva	0.100113	0.457501	0.409368
GO:0060732	positive regulation of inositol phosphate biosynthetic process	10	-0.60076	-1.40991	sva	0.100199	0.457538	0.409401
GO:0097711	ciliary basal body-plasma membrane docking	83	0.319594	1.2528	sva	0.100357	0.457897	0.409723
GO:0001649	osteoblast differentiation	179	0.270473	1.19122	sva	0.100785	0.45943	0.411094
GO:0009635	response to herbicide	11	-0.584116	-1.40682	sva	0.100851	0.45943	0.411094
GO:0090049	regulation of cell migration involved in sprouting angiogenesis	39	-0.403895	-1.32397	sva	0.101656	0.461804	0.413218
GO:0006066	alcohol metabolic process	274	0.250272	1.16054	sva	0.101666	0.461804	0.413218
GO:0034976	response to endoplasmic reticulum stress	252	-0.268368	-1.18496	sva	0.101677	0.461804	0.413218
GO:0050770	regulation of axonogenesis	160	-0.290944	-1.21608	sva	0.10172	0.461804	0.413218
GO:0010676	positive regulation of cellular carbohydrate metabolic process	47	-0.384399	-1.30921	sva	0.101826	0.461804	0.413218
GO:0051148	negative regulation of muscle cell differentiation	39	0.388616	1.31301	sva	0.102087	0.461804	0.413218
GO:0006349	regulation of gene expression by genetic imprinting	16	0.50753	1.37983	sva	0.102095	0.461804	0.413218
GO:0072678	T cell migration	39	-0.403636	-1.32312	sva	0.10212	0.461804	0.413218
GO:0002793	positive regulation of peptide secretion	221	-0.27434	-1.19365	sva	0.102142	0.461804	0.413218
GO:0035721	intraciliary retrograde transport	11	0.570735	1.40034	sva	0.102177	0.461804	0.413218
GO:1901983	regulation of protein acetylation	64	0.340155	1.27163	sva	0.102244	0.461804	0.413218
GO:0001771	immunological synapse formation	10	-0.599009	-1.4058	sva	0.102437	0.462316	0.413676
GO:0009311	oligosaccharide metabolic process	62	-0.357836	-1.28642	sva	0.102814	0.463658	0.414877
GO:0050850	positive regulation of calcium-mediated signaling	32	-0.425655	-1.33662	sva	0.102962	0.463897	0.415091
GO:0050853	B cell receptor signaling pathway	47	-0.383847	-1.30733	sva	0.103026	0.463897	0.415091
GO:0046394	carboxylic acid biosynthetic process	350	0.240441	1.14343	sva	0.103636	0.46628	0.417223
GO:0072595	maintenance of protein localization in organelle	38	0.390798	1.31261	sva	0.103725	0.466321	0.41726
GO:0001894	tissue homeostasis	177	0.270347	1.18896	sva	0.10415	0.467018	0.417883
GO:0050768	negative regulation of neurogenesis	241	-0.269898	-1.18589	sva	0.104325	0.467018	0.417883
GO:0006521	regulation of cellular amino acid metabolic process	51	-0.375156	-1.29903	sva	0.104382	0.467018	0.417883
GO:0014829	vascular smooth muscle contraction	19	-0.493839	-1.37086	sva	0.10443	0.467018	0.417883
GO:1902188	positive regulation of viral release from host cell	13	0.539879	1.38742	sva	0.104506	0.467018	0.417883
GO:0007265	Ras protein signal transduction	405	-0.249235	-1.15419	sva	0.104563	0.467018	0.417883
GO:0002675	positive regulation of acute inflammatory response	22	-0.472777	-1.36072	sva	0.104605	0.467018	0.417883
GO:0010742	macrophage derived foam cell differentiation	31	0.414129	1.32844	sva	0.104653	0.467018	0.417883
GO:0090077	foam cell differentiation	31	0.414129	1.32844	sva	0.104653	0.467018	0.417883
GO:0070207	protein homotrimerization	24	-0.460885	-1.35482	sva	0.104682	0.467018	0.417883
GO:0043542	endothelial cell migration	168	-0.287489	-1.20915	sva	0.104942	0.467526	0.418339
GO:0061098	positive regulation of protein tyrosine kinase activity	38	-0.405179	-1.32119	sva	0.104957	0.467526	0.418339
GO:0006414	translational elongation	122	-0.306131	-1.23166	sva	0.105314	0.468759	0.419442
GO:0032095	regulation of response to food	14	0.527094	1.38244	sva	0.10544	0.468964	0.419625
GO:0031953	negative regulation of protein autophosphorylation	10	0.584624	1.39561	sva	0.105715	0.469827	0.420397
GO:0045669	positive regulation of osteoblast differentiation	52	0.357365	1.28329	sva	0.106037	0.470382	0.420894
GO:0035306	positive regulation of dephosphorylation	45	-0.386781	-1.30606	sva	0.106038	0.470382	0.420894
GO:0085029	extracellular matrix assembly	32	0.409557	1.32323	sva	0.106082	0.470382	0.420894
GO:0070757	interleukin-35-mediated signaling pathway	11	0.567544	1.39251	sva	0.106302	0.470891	0.421349
GO:0030516	regulation of axon extension	81	-0.334403	-1.26088	sva	0.106359	0.470891	0.421349
GO:0072528	pyrimidine-containing compound biosynthetic process	37	0.392271	1.30993	sva	0.106477	0.471056	0.421497
GO:0042730	fibrinolysis	18	-0.500412	-1.37046	sva	0.106597	0.471071	0.42151
GO:0042451	purine nucleoside biosynthetic process	19	-0.492335	-1.36668	sva	0.106723	0.471071	0.42151
GO:0046129	purine ribonucleoside biosynthetic process	19	-0.492335	-1.36668	sva	0.106723	0.471071	0.42151
GO:0046850	regulation of bone remodeling	40	0.383513	1.30292	sva	0.107174	0.4727	0.422968
GO:0016055	Wnt signaling pathway	437	-0.246176	-1.1477	sva	0.107401	0.473052	0.423282
GO:0014821	phasic smooth muscle contraction	15	-0.52729	-1.37902	sva	0.107434	0.473052	0.423282
GO:0006884	cell volume homeostasis	22	0.457001	1.34913	sva	0.107497	0.473052	0.423282
GO:0009109	coenzyme catabolic process	12	0.551368	1.38614	sva	0.107705	0.473611	0.423783
GO:0060674	placenta blood vessel development	26	0.434423	1.33645	sva	0.107902	0.474119	0.424237
GO:1903557	positive regulation of tumor necrosis factor superfamily cytokine production	58	-0.361667	-1.28391	sva	0.108066	0.474475	0.424556
GO:0046514	ceramide catabolic process	11	-0.578567	-1.39346	sva	0.108146	0.474475	0.424556
GO:1902668	negative regulation of axon guidance	20	-0.484036	-1.36051	sva	0.108412	0.475044	0.425065
GO:0099624	atrial cardiac muscle cell membrane repolarization	10	-0.594605	-1.39547	sva	0.108439	0.475044	0.425065
GO:0010466	negative regulation of peptidase activity	203	0.262392	1.17479	sva	0.108634	0.475537	0.425506
GO:0014808	release of sequestered calcium ion into cytosol by sarcoplasmic reticulum	28	0.424332	1.32909	sva	0.108741	0.47565	0.425607
GO:0060433	bronchus development	10	0.582157	1.38972	sva	0.109096	0.476845	0.426677
GO:0016053	organic acid biosynthetic process	351	0.239421	1.13888	sva	0.109194	0.476916	0.42674
GO:0019934	cGMP-mediated signaling	11	-0.57756	-1.39103	sva	0.109458	0.477547	0.427305
GO:0030325	adrenal gland development	18	-0.498406	-1.36497	sva	0.109503	0.477547	0.427305
GO:0014850	response to muscle activity	20	0.468812	1.35145	sva	0.109774	0.478373	0.428044
GO:0070374	positive regulation of ERK1 and ERK2 cascade	191	-0.279649	-1.19546	sva	0.110148	0.479643	0.42918
GO:0002040	sprouting angiogenesis	96	-0.320613	-1.24323	sva	0.110232	0.479648	0.429185
GO:0040018	positive regulation of multicellular organism growth	30	0.414704	1.31991	sva	0.110639	0.480343	0.429807
GO:0042448	progesterone metabolic process	17	-0.505922	-1.36607	sva	0.110643	0.480343	0.429807
GO:0035308	negative regulation of protein dephosphorylation	45	-0.384525	-1.29844	sva	0.110714	0.480343	0.429807
GO:0050848	regulation of calcium-mediated signaling	71	-0.343255	-1.26489	sva	0.110721	0.480343	0.429807
GO:0009266	response to temperature stimulus	204	-0.276013	-1.18951	sva	0.11161	0.483836	0.432932
GO:0007030	Golgi organization	116	0.29281	1.21248	sva	0.11174	0.483887	0.432978
GO:0035089	establishment of apical/basal cell polarity	15	-0.524336	-1.37129	sva	0.111788	0.483887	0.432978
GO:0061418	regulation of transcription from RNA polymerase II promoter in response to hypoxia	70	-0.343998	-1.26448	sva	0.112069	0.484622	0.433635
GO:0009395	phospholipid catabolic process	32	-0.420803	-1.32138	sva	0.11213	0.484622	0.433635
GO:0031665	negative regulation of lipopolysaccharide-mediated signaling pathway	10	-0.591827	-1.38895	sva	0.112245	0.484622	0.433635
GO:0001759	organ induction	16	0.500722	1.36132	sva	0.11229	0.484622	0.433635
GO:0070106	interleukin-27-mediated signaling pathway	11	0.563135	1.38169	sva	0.112448	0.484941	0.433921
GO:0006309	apoptotic DNA fragmentation	19	0.474454	1.34934	sva	0.1128	0.485815	0.434703
GO:0002478	antigen processing and presentation of exogenous peptide antigen	151	-0.291304	-1.2081	sva	0.112817	0.485815	0.434703
GO:0010001	glial cell differentiation	183	0.266587	1.17756	sva	0.112989	0.485928	0.434804
GO:0033013	tetrapyrrole metabolic process	49	-0.374994	-1.2883	sva	0.11301	0.485928	0.434804
GO:0010259	multicellular organism aging	21	-0.473893	-1.34808	sva	0.113459	0.486715	0.435508
GO:0007549	dosage compensation	13	0.533488	1.371	sva	0.113483	0.486715	0.435508
GO:1905477	positive regulation of protein localization to membrane	108	-0.311503	-1.23065	sva	0.113585	0.486715	0.435508
GO:0046415	urate metabolic process	10	0.578818	1.38175	sva	0.113622	0.486715	0.435508
GO:0021801	cerebral cortex radial glia guided migration	18	-0.495834	-1.35792	sva	0.113695	0.486715	0.435508
GO:0022030	telencephalon glial cell migration	18	-0.495834	-1.35792	sva	0.113695	0.486715	0.435508
GO:1901019	regulation of calcium ion transmembrane transporter activity	81	-0.331748	-1.25087	sva	0.11402	0.487749	0.436434
GO:0007342	fusion of sperm to egg plasma membrane involved in single fertilization	11	-0.574261	-1.38309	sva	0.114114	0.487793	0.436473
GO:0030501	positive regulation of bone mineralization	28	-0.435649	-1.32699	sva	0.114202	0.487809	0.436487
GO:0006047	UDP-N-acetylglucosamine metabolic process	13	0.532812	1.36926	sva	0.114534	0.488867	0.437434
GO:1905952	regulation of lipid localization	111	-0.309319	-1.22704	sva	0.114992	0.490154	0.438585
GO:0010508	positive regulation of autophagy	94	0.305674	1.2237	sva	0.115021	0.490154	0.438585
GO:1903830	magnesium ion transmembrane transport	12	-0.558582	-1.3773	sva	0.115088	0.490154	0.438585
GO:0002064	epithelial cell development	176	0.268104	1.17833	sva	0.11529	0.490373	0.438782
GO:0198738	cell-cell signaling by wnt	439	-0.244764	-1.14158	sva	0.115308	0.490373	0.438782
GO:0019532	oxalate transport	10	0.577461	1.37851	sva	0.115476	0.49073	0.439101
GO:0043536	positive regulation of blood vessel endothelial cell migration	52	-0.368365	-1.28027	sva	0.115665	0.490954	0.439301
GO:0071900	regulation of protein serine/threonine kinase activity	445	-0.244273	-1.14059	sva	0.115697	0.490954	0.439301
GO:0016322	neuron remodeling	10	-0.589254	-1.38291	sva	0.115949	0.491358	0.439663
GO:0000096	sulfur amino acid metabolic process	32	0.404546	1.30704	sva	0.115961	0.491358	0.439663
GO:1901216	positive regulation of neuron death	71	-0.341254	-1.25752	sva	0.116139	0.491753	0.440016
GO:0051222	positive regulation of protein transport	374	-0.249958	-1.149	sva	0.116285	0.492016	0.440251
GO:0046839	phospholipid dephosphorylation	36	-0.405162	-1.30603	sva	0.116768	0.493129	0.441247
GO:0045843	negative regulation of striated muscle tissue development	42	0.374148	1.28468	sva	0.116802	0.493129	0.441247
GO:0046479	glycosphingolipid catabolic process	10	-0.588587	-1.38134	sva	0.116848	0.493129	0.441247
GO:0019373	epoxygenase P450 pathway	15	-0.520987	-1.36253	sva	0.116887	0.493129	0.441247
GO:0032330	regulation of chondrocyte differentiation	40	0.378913	1.2873	sva	0.117097	0.49359	0.44166
GO:0032274	gonadotropin secretion	14	-0.531995	-1.36658	sva	0.117166	0.49359	0.44166
GO:0034349	glial cell apoptotic process	13	-0.543649	-1.36976	sva	0.117285	0.493606	0.441674
GO:0046007	negative regulation of activated T cell proliferation	11	-0.571834	-1.37725	sva	0.117376	0.493606	0.441674
GO:1903827	regulation of cellular protein localization	461	-0.242863	-1.13745	sva	0.117667	0.493606	0.441674
GO:0048635	negative regulation of muscle organ development	43	0.37136	1.28145	sva	0.117731	0.493606	0.441674
GO:1902514	regulation of calcium ion transmembrane transport via high voltage-gated calcium channel	10	-0.587955	-1.37986	sva	0.117758	0.493606	0.441674
GO:0032680	regulation of tumor necrosis factor production	100	-0.315369	-1.23095	sva	0.117763	0.493606	0.441674
GO:1901862	negative regulation of muscle tissue development	44	0.368917	1.27919	sva	0.117763	0.493606	0.441674
GO:0006936	muscle contraction	294	-0.258721	-1.16134	sva	0.118227	0.494917	0.442847
GO:0043648	dicarboxylic acid metabolic process	96	0.303372	1.21881	sva	0.118398	0.494917	0.442847
GO:0032612	interleukin-1 production	72	-0.339207	-1.253	sva	0.118922	0.494917	0.442847
GO:1902532	negative regulation of intracellular signal transduction	456	-0.243015	-1.13704	sva	0.118935	0.494917	0.442847
GO:0016114	terpenoid biosynthetic process	14	-0.530721	-1.36331	sva	0.119016	0.494917	0.442847
GO:0098586	cellular response to virus	41	-0.390281	-1.29311	sva	0.119068	0.494917	0.442847
GO:0006664	glycolipid metabolic process	105	-0.311654	-1.22586	sva	0.119108	0.494917	0.442847
GO:1903509	liposaccharide metabolic process	105	-0.311654	-1.22586	sva	0.119108	0.494917	0.442847
GO:0002819	regulation of adaptive immune response	113	-0.306954	-1.22106	sva	0.119181	0.494917	0.442847
GO:1903793	positive regulation of anion transport	40	-0.392663	-1.29424	sva	0.119222	0.494917	0.442847
GO:0006198	cAMP catabolic process	17	-0.500256	-1.35077	sva	0.119308	0.494917	0.442847
GO:1901017	negative regulation of potassium ion transmembrane transporter activity	17	0.487009	1.345	sva	0.119361	0.494917	0.442847
GO:1901021	positive regulation of calcium ion transmembrane transporter activity	30	0.410338	1.30602	sva	0.119369	0.494917	0.442847
GO:0043576	regulation of respiratory gaseous exchange	20	-0.477179	-1.34124	sva	0.119451	0.494917	0.442847
GO:0099625	ventricular cardiac muscle cell membrane repolarization	25	0.433078	1.31961	sva	0.119509	0.494917	0.442847
GO:0002088	lens development in camera-type eye	60	0.339449	1.25343	sva	0.119516	0.494917	0.442847
GO:0009130	pyrimidine nucleoside monophosphate biosynthetic process	14	0.517539	1.35738	sva	0.119521	0.494917	0.442847
GO:0014904	myotube cell development	32	-0.416918	-1.30918	sva	0.119965	0.496399	0.444174
GO:0031647	regulation of protein stability	224	-0.269781	-1.17566	sva	0.120168	0.496888	0.444611
GO:0042773	ATP synthesis coupled electron transport	73	-0.337606	-1.2502	sva	0.120362	0.497339	0.445014
GO:0019395	fatty acid oxidation	86	0.310376	1.22421	sva	0.120659	0.497937	0.44555
GO:0007051	spindle organization	144	0.277731	1.18744	sva	0.120823	0.497937	0.44555
GO:0072393	microtubule anchoring at microtubule organizing center	10	0.573724	1.36958	sva	0.120886	0.497937	0.44555
GO:0010951	negative regulation of endopeptidase activity	193	0.262249	1.1666	sva	0.121162	0.497937	0.44555
GO:0060306	regulation of membrane repolarization	32	0.402059	1.299	sva	0.121249	0.497937	0.44555
GO:1903510	mucopolysaccharide metabolic process	103	-0.312294	-1.22465	sva	0.121282	0.497937	0.44555
GO:0002223	stimulatory C-type lectin receptor signaling pathway	103	-0.312288	-1.22463	sva	0.1213	0.497937	0.44555
GO:0042403	thyroid hormone metabolic process	15	-0.518085	-1.35494	sva	0.121356	0.497937	0.44555
GO:0010755	regulation of plasminogen activation	11	-0.568994	-1.3704	sva	0.121426	0.497937	0.44555
GO:0051961	negative regulation of nervous system development	259	-0.263208	-1.16573	sva	0.121436	0.497937	0.44555
GO:0007159	leukocyte cell-cell adhesion	267	-0.261929	-1.16392	sva	0.121448	0.497937	0.44555
GO:0042311	vasodilation	25	-0.445892	-1.32355	sva	0.121582	0.498137	0.445728
GO:0042088	T-helper 1 type immune response	34	-0.409163	-1.30236	sva	0.121806	0.498419	0.445981
GO:0072337	modified amino acid transport	18	0.476916	1.33728	sva	0.122013	0.498419	0.445981
GO:0072109	glomerular mesangium development	13	0.527738	1.35622	sva	0.122028	0.498419	0.445981
GO:0022038	corpus callosum development	15	-0.517547	-1.35354	sva	0.122193	0.498419	0.445981
GO:0061138	morphogenesis of a branching epithelium	159	0.271939	1.17891	sva	0.122199	0.498419	0.445981
GO:0050702	interleukin-1 beta secretion	37	-0.399654	-1.29573	sva	0.122208	0.498419	0.445981
GO:0014855	striated muscle cell proliferation	59	0.339857	1.25073	sva	0.12225	0.498419	0.445981
GO:0008593	regulation of Notch signaling pathway	79	-0.330793	-1.24189	sva	0.122454	0.498869	0.446383
GO:0042752	regulation of circadian rhythm	87	-0.323668	-1.23513	sva	0.122532	0.498869	0.446383
GO:0009129	pyrimidine nucleoside monophosphate metabolic process	15	0.503941	1.34669	sva	0.123018	0.500074	0.447462
GO:1902991	regulation of amyloid precursor protein catabolic process	23	-0.455934	-1.32651	sva	0.12319	0.500074	0.447462
GO:0006687	glycosphingolipid metabolic process	62	-0.349902	-1.2579	sva	0.123405	0.500074	0.447462
GO:0090670	RNA localization to Cajal body	18	-0.48964	-1.34096	sva	0.123573	0.500074	0.447462
GO:0090671	telomerase RNA localization to Cajal body	18	-0.48964	-1.34096	sva	0.123573	0.500074	0.447462
GO:0090672	telomerase RNA localization	18	-0.48964	-1.34096	sva	0.123573	0.500074	0.447462
GO:0090685	RNA localization to nucleus	18	-0.48964	-1.34096	sva	0.123573	0.500074	0.447462
GO:1904872	regulation of telomerase RNA localization to Cajal body	18	-0.48964	-1.34096	sva	0.123573	0.500074	0.447462
GO:0035304	regulation of protein dephosphorylation	110	-0.307289	-1.21729	sva	0.123601	0.500074	0.447462
GO:0050708	regulation of protein secretion	362	-0.249895	-1.14518	sva	0.123867	0.500799	0.448111
GO:0046653	tetrahydrofolate metabolic process	17	0.484207	1.33726	sva	0.124067	0.50126	0.448523
GO:0048843	negative regulation of axon extension involved in axon guidance	18	-0.48916	-1.33964	sva	0.124335	0.501578	0.448807
GO:0036297	interstrand cross-link repair	39	0.378299	1.27815	sva	0.124403	0.501578	0.448807
GO:1905276	regulation of epithelial tube formation	15	0.503057	1.34433	sva	0.124404	0.501578	0.448807
GO:0050856	regulation of T cell receptor signaling pathway	31	-0.418298	-1.30399	sva	0.12468	0.502048	0.449228
GO:0035810	positive regulation of urine volume	12	-0.551917	-1.36087	sva	0.124811	0.502048	0.449228
GO:1904018	positive regulation of vasculature development	162	-0.284447	-1.19083	sva	0.124939	0.502048	0.449228
GO:0001574	ganglioside biosynthetic process	10	-0.582796	-1.36775	sva	0.124992	0.502048	0.449228
GO:0050892	intestinal absorption	28	-0.430026	-1.30986	sva	0.125013	0.502048	0.449228
GO:0060191	regulation of lipase activity	71	-0.338172	-1.24616	sva	0.125038	0.502048	0.449228
GO:0002674	negative regulation of acute inflammatory response	10	-0.582586	-1.36726	sva	0.125319	0.502829	0.449927
GO:0051188	cofactor biosynthetic process	257	-0.262727	-1.16258	sva	0.125532	0.502936	0.450023
GO:0030851	granulocyte differentiation	28	-0.429722	-1.30893	sva	0.12556	0.502936	0.450023
GO:0007271	synaptic transmission, cholinergic	26	-0.438759	-1.31427	sva	0.125604	0.502936	0.450023
GO:0001906	cell killing	108	-0.307943	-1.21658	sva	0.125697	0.502962	0.450046
GO:0090208	positive regulation of triglyceride metabolic process	16	0.492248	1.33828	sva	0.12618	0.503967	0.450945
GO:0090314	positive regulation of protein targeting to membrane	24	-0.448602	-1.31871	sva	0.126214	0.503967	0.450945
GO:0050982	detection of mechanical stimulus	36	0.386286	1.2819	sva	0.126346	0.503967	0.450945
GO:1901380	negative regulation of potassium ion transmembrane transport	20	0.459172	1.32366	sva	0.126369	0.503967	0.450945
GO:0071549	cellular response to dexamethasone stimulus	32	-0.41373	-1.29917	sva	0.126514	0.503967	0.450945
GO:0030177	positive regulation of Wnt signaling pathway	141	-0.291557	-1.19765	sva	0.126667	0.503967	0.450945
GO:0034356	NAD biosynthesis via nicotinamide riboside salvage pathway	11	-0.565324	-1.36156	sva	0.126723	0.503967	0.450945
GO:0046189	phenol-containing compound biosynthetic process	32	-0.413582	-1.29871	sva	0.126808	0.503967	0.450945
GO:0060074	synapse maturation	16	-0.505102	-1.34292	sva	0.126871	0.503967	0.450945
GO:0042035	regulation of cytokine biosynthetic process	80	-0.328281	-1.23519	sva	0.127004	0.503967	0.450945
GO:0030816	positive regulation of cAMP metabolic process	30	-0.420936	-1.30261	sva	0.127012	0.503967	0.450945
GO:0071384	cellular response to corticosteroid stimulus	61	-0.349903	-1.25416	sva	0.127052	0.503967	0.450945
GO:0055013	cardiac muscle cell development	53	-0.362132	-1.26342	sva	0.127074	0.503967	0.450945
GO:0045742	positive regulation of epidermal growth factor receptor signaling pathway	31	-0.417101	-1.30026	sva	0.127223	0.504	0.450975
GO:0050961	detection of temperature stimulus involved in sensory perception	12	-0.550181	-1.35659	sva	0.127467	0.504	0.450975
GO:0050965	detection of temperature stimulus involved in sensory perception of pain	12	-0.550181	-1.35659	sva	0.127467	0.504	0.450975
GO:0044818	mitotic G2/M transition checkpoint	25	0.428973	1.30711	sva	0.127579	0.504	0.450975
GO:0010172	embryonic body morphogenesis	11	-0.564697	-1.36005	sva	0.127623	0.504	0.450975
GO:1903897	regulation of PERK-mediated unfolded protein response	10	-0.580959	-1.36344	sva	0.12767	0.504	0.450975
GO:0035774	positive regulation of insulin secretion involved in cellular response to glucose stimulus	26	-0.437712	-1.31114	sva	0.127688	0.504	0.450975
GO:1903514	release of sequestered calcium ion into cytosol by endoplasmic reticulum	29	0.41001	1.29462	sva	0.128335	0.506211	0.452953
GO:0045926	negative regulation of growth	209	0.257146	1.15534	sva	0.128513	0.506571	0.453275
GO:0031638	zymogen activation	45	-0.376591	-1.27165	sva	0.129051	0.507893	0.454459
GO:0061217	regulation of mesonephros development	20	0.457553	1.31899	sva	0.12927	0.507893	0.454459
GO:0016137	glycoside metabolic process	16	-0.503586	-1.33889	sva	0.129309	0.507893	0.454459
GO:0060395	SMAD protein signal transduction	55	0.343309	1.2464	sva	0.129385	0.507893	0.454459
GO:0021700	developmental maturation	218	-0.269083	-1.16894	sva	0.129458	0.507893	0.454459
GO:0009988	cell-cell recognition	55	-0.358005	-1.25825	sva	0.129486	0.507893	0.454459
GO:0055010	ventricular cardiac muscle tissue morphogenesis	47	0.357678	1.258	sva	0.129611	0.507893	0.454459
GO:0046824	positive regulation of nucleocytoplasmic transport	54	-0.359498	-1.25899	sva	0.129666	0.507893	0.454459
GO:0055012	ventricular cardiac muscle cell differentiation	16	0.490064	1.33235	sva	0.129826	0.507893	0.454459
GO:0048557	embryonic digestive tract morphogenesis	18	-0.485917	-1.33076	sva	0.129843	0.507893	0.454459
GO:0070542	response to fatty acid	72	-0.335497	-1.23929	sva	0.129855	0.507893	0.454459
GO:0032388	positive regulation of intracellular transport	218	-0.268991	-1.16854	sva	0.129896	0.507893	0.454459
GO:0060042	retina morphogenesis in camera-type eye	43	-0.380567	-1.27346	sva	0.130494	0.509574	0.455963
GO:0043968	histone H2A acetylation	13	-0.534961	-1.34787	sva	0.130587	0.509574	0.455963
GO:0031645	negative regulation of neurological system process	12	-0.548159	-1.35161	sva	0.130588	0.509574	0.455963
GO:0046596	regulation of viral entry into host cell	26	0.422622	1.30015	sva	0.130688	0.509623	0.456006
GO:0051249	regulation of lymphocyte activation	347	-0.25028	-1.14232	sva	0.13087	0.509925	0.456277
GO:0032211	negative regulation of telomere maintenance via telomerase	18	0.471716	1.3227	sva	0.131113	0.509925	0.456277
GO:0099133	ATP hydrolysis coupled anion transmembrane transport	12	0.535388	1.34597	sva	0.131113	0.509925	0.456277
GO:0043046	DNA methylation involved in gamete generation	14	0.510083	1.33782	sva	0.131116	0.509925	0.456277
GO:0006677	glycosylceramide metabolic process	15	-0.511628	-1.33806	sva	0.131642	0.51163	0.457802
GO:0010165	response to X-ray	32	-0.411271	-1.29145	sva	0.131824	0.511934	0.458074
GO:0001736	establishment of planar polarity	107	-0.306796	-1.21036	sva	0.131984	0.511934	0.458074
GO:0007164	establishment of tissue polarity	107	-0.306796	-1.21036	sva	0.131984	0.511934	0.458074
GO:0045026	plasma membrane fusion	31	-0.414649	-1.29262	sva	0.132279	0.512393	0.458484
GO:0044089	positive regulation of cellular component biogenesis	448	-0.24167	-1.12904	sva	0.132305	0.512393	0.458484
GO:0015718	monocarboxylic acid transport	132	-0.293961	-1.19633	sva	0.132425	0.512393	0.458484
GO:0018958	phenol-containing compound metabolic process	77	-0.32961	-1.23191	sva	0.132455	0.512393	0.458484
GO:0072697	protein localization to cell cortex	10	0.566046	1.35126	sva	0.13259	0.512576	0.458649
GO:0010922	positive regulation of phosphatase activity	27	-0.430584	-1.30099	sva	0.132756	0.512786	0.458837
GO:1900424	regulation of defense response to bacterium	12	-0.546384	-1.34723	sva	0.13326	0.512786	0.458837
GO:0071331	cellular response to hexose stimulus	109	-0.30525	-1.20767	sva	0.133278	0.512786	0.458837
GO:0099132	ATP hydrolysis coupled cation transmembrane transport	51	-0.363302	-1.25798	sva	0.133308	0.512786	0.458837
GO:0046628	positive regulation of insulin receptor signaling pathway	13	-0.53321	-1.34346	sva	0.133357	0.512786	0.458837
GO:0072673	lamellipodium morphogenesis	17	0.478818	1.32237	sva	0.13342	0.512786	0.458837
GO:0006911	phagocytosis, engulfment	37	-0.394785	-1.27994	sva	0.133451	0.512786	0.458837
GO:0034103	regulation of tissue remodeling	62	0.331866	1.23316	sva	0.133452	0.512786	0.458837
GO:0010839	negative regulation of keratinocyte proliferation	13	0.520454	1.3375	sva	0.133479	0.512786	0.458837
GO:0070293	renal absorption	16	0.488	1.32674	sva	0.133544	0.512786	0.458837
GO:0001738	morphogenesis of a polarized epithelium	121	-0.298864	-1.20107	sva	0.133613	0.512786	0.458837
GO:0090342	regulation of cell aging	42	-0.381538	-1.27059	sva	0.133793	0.513137	0.459151
GO:0010921	regulation of phosphatase activity	151	-0.286069	-1.18639	sva	0.134104	0.513811	0.459754
GO:0018209	peptidyl-serine modification	277	-0.258165	-1.15164	sva	0.134159	0.513811	0.459754
GO:0030705	cytoskeleton-dependent intracellular transport	152	0.271701	1.17059	sva	0.134233	0.513811	0.459754
GO:0007050	cell cycle arrest	226	-0.266498	-1.16253	sva	0.134763	0.515498	0.461263
GO:2000738	positive regulation of stem cell differentiation	13	0.519658	1.33546	sva	0.134871	0.515572	0.46133
GO:0060914	heart formation	22	0.441642	1.30379	sva	0.135122	0.516195	0.461887
GO:0090177	establishment of planar polarity involved in neural tube closure	13	0.519357	1.33468	sva	0.135386	0.516863	0.462485
GO:0010737	protein kinase A signaling	31	-0.413152	-1.28795	sva	0.135487	0.516867	0.462488
GO:0009072	aromatic amino acid family metabolic process	25	0.424945	1.29483	sva	0.135614	0.516867	0.462488
GO:0000271	polysaccharide biosynthetic process	65	-0.341618	-1.23896	sva	0.135653	0.516867	0.462488
GO:0042135	neurotransmitter catabolic process	20	0.454057	1.30892	sva	0.135845	0.516955	0.462567
GO:0071706	tumor necrosis factor superfamily cytokine production	107	-0.305771	-1.20632	sva	0.135854	0.516955	0.462567
GO:0031960	response to corticosteroid	142	-0.288961	-1.18815	sva	0.136041	0.517083	0.462682
GO:0046822	regulation of nucleocytoplasmic transport	93	-0.315028	-1.21533	sva	0.136129	0.517083	0.462682
GO:0006022	aminoglycan metabolic process	149	-0.28634	-1.18524	sva	0.136185	0.517083	0.462682
GO:0071326	cellular response to monosaccharide stimulus	110	-0.303843	-1.20364	sva	0.136243	0.517083	0.462682
GO:0032780	negative regulation of ATPase activity	13	0.518642	1.33285	sva	0.136597	0.517796	0.463319
GO:0090101	negative regulation of transmembrane receptor protein serine/threonine kinase signaling pathway	97	-0.312003	-1.21187	sva	0.136608	0.517796	0.463319
GO:0019370	leukotriene biosynthetic process	14	-0.519451	-1.33435	sva	0.136808	0.518216	0.463695
GO:0010662	regulation of striated muscle cell apoptotic process	30	0.402095	1.27978	sva	0.136947	0.518224	0.463702
GO:0048015	phosphatidylinositol-mediated signaling	137	-0.290741	-1.18956	sva	0.136988	0.518224	0.463702
GO:0003156	regulation of animal organ formation	27	0.414755	1.2876	sva	0.13748	0.519745	0.465063
GO:0008286	insulin receptor signaling pathway	111	-0.302971	-1.20185	sva	0.13767	0.519821	0.465131
GO:0045103	intermediate filament-based process	37	0.378351	1.26345	sva	0.137828	0.519821	0.465131
GO:0045104	intermediate filament cytoskeleton organization	37	0.378351	1.26345	sva	0.137828	0.519821	0.465131
GO:0000083	regulation of transcription involved in G1/S transition of mitotic cell cycle	26	-0.432613	-1.29586	sva	0.137995	0.519821	0.465131
GO:0072173	metanephric tubule morphogenesis	10	0.562503	1.3428	sva	0.138067	0.519821	0.465131
GO:1901215	negative regulation of neuron death	171	-0.278718	-1.1751	sva	0.138168	0.519821	0.465131
GO:0032075	positive regulation of nuclease activity	15	-0.50766	-1.32768	sva	0.138217	0.519821	0.465131
GO:0071880	adenylate cyclase-activating adrenergic receptor signaling pathway	21	-0.459996	-1.30855	sva	0.138382	0.519821	0.465131
GO:0050954	sensory perception of mechanical stimulus	141	-0.288791	-1.18629	sva	0.13848	0.519821	0.465131
GO:0032945	negative regulation of mononuclear cell proliferation	63	-0.343298	-1.23787	sva	0.138482	0.519821	0.465131
GO:0050672	negative regulation of lymphocyte proliferation	63	-0.343298	-1.23787	sva	0.138482	0.519821	0.465131
GO:0010613	positive regulation of cardiac muscle hypertrophy	25	-0.43709	-1.29742	sva	0.138798	0.520335	0.465591
GO:0014742	positive regulation of muscle hypertrophy	25	-0.43709	-1.29742	sva	0.138798	0.520335	0.465591
GO:0008652	cellular amino acid biosynthetic process	70	0.320437	1.21838	sva	0.138887	0.520335	0.465591
GO:2000058	regulation of ubiquitin-dependent protein catabolic process	130	-0.293294	-1.19098	sva	0.139066	0.52067	0.465891
GO:0022011	myelination in peripheral nervous system	21	0.44555	1.3002	sva	0.139484	0.521351	0.4665
GO:0032292	peripheral nervous system axon ensheathment	21	0.44555	1.3002	sva	0.139484	0.521351	0.4665
GO:0071871	response to epinephrine	16	-0.497645	-1.3231	sva	0.139516	0.521351	0.4665
GO:1903828	negative regulation of cellular protein localization	93	-0.313958	-1.2112	sva	0.139847	0.521935	0.467022
GO:0045603	positive regulation of endothelial cell differentiation	16	0.484394	1.31693	sva	0.139891	0.521935	0.467022
GO:0006275	regulation of DNA replication	109	-0.303493	-1.20072	sva	0.139983	0.521935	0.467022
GO:0009166	nucleotide catabolic process	143	-0.287711	-1.18422	sva	0.140031	0.521935	0.467022
GO:1903320	regulation of protein modification by small protein conjugation or removal	178	-0.276354	-1.17118	sva	0.140183	0.522165	0.467229
GO:2000647	negative regulation of stem cell proliferation	12	0.52946	1.33106	sva	0.140697	0.523459	0.468386
GO:0002768	immune response-regulating cell surface receptor signaling pathway	326	-0.250973	-1.1385	sva	0.140764	0.523459	0.468386
GO:0015872	dopamine transport	34	-0.400528	-1.27487	sva	0.1408	0.523459	0.468386
GO:0051983	regulation of chromosome segregation	88	-0.317342	-1.21313	sva	0.140957	0.52371	0.468611
GO:0090527	actin filament reorganization	10	0.560422	1.33783	sva	0.141351	0.524836	0.469619
GO:0030488	tRNA methylation	31	0.396356	1.27143	sva	0.141686	0.525748	0.470434
GO:0060070	canonical Wnt signaling pathway	272	-0.257618	-1.14705	sva	0.141858	0.526048	0.470703
GO:0061162	establishment of monopolar cell polarity	17	-0.486929	-1.31479	sva	0.141953	0.526066	0.470719
GO:0007623	circadian rhythm	176	-0.276518	-1.17008	sva	0.142049	0.526078	0.47073
GO:2001225	regulation of chloride transport	10	-0.571391	-1.34099	sva	0.142137	0.526078	0.47073
GO:1903555	regulation of tumor necrosis factor superfamily cytokine production	103	-0.306483	-1.20186	sva	0.142422	0.526797	0.471374
GO:1901186	positive regulation of ERBB signaling pathway	33	-0.403128	-1.27462	sva	0.142519	0.526822	0.471396
GO:0043407	negative regulation of MAP kinase activity	67	-0.336891	-1.2284	sva	0.142678	0.527077	0.471624
GO:0019048	modulation by virus of host morphology or physiology	34	0.385223	1.26207	sva	0.143759	0.530597	0.474773
GO:0036376	sodium ion export across plasma membrane	11	0.54223	1.3304	sva	0.143813	0.530597	0.474773
GO:1901881	positive regulation of protein depolymerization	16	-0.494958	-1.31595	sva	0.144315	0.531666	0.47573
GO:0016226	iron-sulfur cluster assembly	16	-0.494803	-1.31554	sva	0.144561	0.531666	0.47573
GO:0031163	metallo-sulfur cluster assembly	16	-0.494803	-1.31554	sva	0.144561	0.531666	0.47573
GO:0007625	grooming behavior	14	-0.514641	-1.322	sva	0.144626	0.531666	0.47573
GO:0036065	fucosylation	27	-0.424849	-1.28366	sva	0.144637	0.531666	0.47573
GO:0042698	ovulation cycle	55	-0.352596	-1.23924	sva	0.144651	0.531666	0.47573
GO:0043266	regulation of potassium ion transport	81	-0.3221	-1.21449	sva	0.144772	0.531773	0.475826
GO:0050765	negative regulation of phagocytosis	15	-0.503747	-1.31745	sva	0.144971	0.532168	0.476179
GO:0001942	hair follicle development	70	-0.332705	-1.22297	sva	0.145207	0.532308	0.476305
GO:0031644	regulation of neurological system process	59	-0.346378	-1.23381	sva	0.145302	0.532308	0.476305
GO:0033235	positive regulation of protein sumoylation	10	0.557964	1.33196	sva	0.145368	0.532308	0.476305
GO:0006633	fatty acid biosynthetic process	110	0.287611	1.1815	sva	0.145382	0.532308	0.476305
GO:0070229	negative regulation of lymphocyte apoptotic process	26	0.415606	1.27856	sva	0.145466	0.532308	0.476305
GO:0021799	cerebral cortex radially oriented cell migration	25	-0.433726	-1.28743	sva	0.145761	0.532626	0.476589
GO:0050901	leukocyte tethering or rolling	18	-0.476862	-1.30597	sva	0.145791	0.532626	0.476589
GO:0072594	establishment of protein localization to organelle	474	-0.238183	-1.11811	sva	0.145827	0.532626	0.476589
GO:0014044	Schwann cell development	24	0.425107	1.28248	sva	0.146017	0.532985	0.47691
GO:0043094	cellular metabolic compound salvage	31	0.394418	1.26521	sva	0.146265	0.53339	0.477273
GO:0032640	tumor necrosis factor production	103	-0.305482	-1.19794	sva	0.146313	0.53339	0.477273
GO:0051384	response to glucocorticoid	127	-0.292972	-1.18572	sva	0.146413	0.53339	0.477273
GO:0005976	polysaccharide metabolic process	90	-0.314229	-1.20576	sva	0.146566	0.53339	0.477273
GO:0050729	positive regulation of inflammatory response	87	-0.316646	-1.20834	sva	0.146586	0.53339	0.477273
GO:0060004	reflex	17	-0.484263	-1.30759	sva	0.146818	0.533613	0.477472
GO:0006487	protein N-linked glycosylation	81	-0.321478	-1.21214	sva	0.146889	0.533613	0.477472
GO:0046580	negative regulation of Ras protein signal transduction	41	-0.378688	-1.2547	sva	0.14699	0.533613	0.477472
GO:0002429	immune response-activating cell surface receptor signaling pathway	303	-0.252646	-1.13771	sva	0.147014	0.533613	0.477472
GO:0048871	multicellular organismal homeostasis	282	0.24168	1.12417	sva	0.147496	0.534849	0.478578
GO:0048484	enteric nervous system development	10	-0.567735	-1.33241	sva	0.147746	0.534849	0.478578
GO:0016239	positive regulation of macroautophagy	55	0.337148	1.22403	sva	0.147781	0.534849	0.478578
GO:0071732	cellular response to nitric oxide	14	0.500237	1.312	sva	0.147784	0.534849	0.478578
GO:0006631	fatty acid metabolic process	307	0.238707	1.12023	sva	0.147814	0.534849	0.478578
GO:0006837	serotonin transport	12	-0.537291	-1.32481	sva	0.148019	0.535066	0.478773
GO:0072087	renal vesicle development	18	0.462586	1.2971	sva	0.148058	0.535066	0.478773
GO:0035246	peptidyl-arginine N-methylation	11	-0.551288	-1.32776	sva	0.148456	0.53537	0.479044
GO:0043970	histone H3-K9 acetylation	11	0.539323	1.32327	sva	0.148535	0.53537	0.479044
GO:0044273	sulfur compound catabolic process	42	0.361652	1.24177	sva	0.14858	0.53537	0.479044
GO:0043299	leukocyte degranulation	447	-0.239539	-1.1189	sva	0.148688	0.53537	0.479044
GO:0009713	catechol-containing compound biosynthetic process	16	-0.492459	-1.30931	sva	0.148693	0.53537	0.479044
GO:0042423	catecholamine biosynthetic process	16	-0.492459	-1.30931	sva	0.148693	0.53537	0.479044
GO:0035458	cellular response to interferon-beta	10	-0.566997	-1.33068	sva	0.148924	0.53587	0.479492
GO:0018107	peptidyl-threonine phosphorylation	111	-0.300112	-1.19051	sva	0.149392	0.536892	0.480407
GO:0019915	lipid storage	53	0.339861	1.225	sva	0.149393	0.536892	0.480407
GO:0002260	lymphocyte homeostasis	56	-0.349348	-1.23194	sva	0.149673	0.537568	0.481011
GO:0072606	interleukin-8 secretion	27	0.40904	1.26986	sva	0.149928	0.537936	0.48134
GO:0036066	protein O-linked fucosylation	16	-0.491771	-1.30748	sva	0.14996	0.537936	0.48134
GO:0001909	leukocyte mediated cytotoxicity	74	-0.327179	-1.21435	sva	0.1502	0.538438	0.48179
GO:0002076	osteoblast development	15	-0.500765	-1.30965	sva	0.150286	0.538438	0.48179
GO:1902041	regulation of extrinsic apoptotic signaling pathway via death domain receptors	45	0.354293	1.23462	sva	0.151031	0.538983	0.482277
GO:0043620	regulation of DNA-templated transcription in response to stress	110	-0.300134	-1.18895	sva	0.151397	0.538983	0.482277
GO:0034333	adherens junction assembly	77	0.309742	1.19835	sva	0.151562	0.538983	0.482277
GO:0010919	regulation of inositol phosphate biosynthetic process	12	-0.53513	-1.31948	sva	0.151618	0.538983	0.482277
GO:0071466	cellular response to xenobiotic stimulus	145	-0.284421	-1.17292	sva	0.151629	0.538983	0.482277
GO:1903531	negative regulation of secretion by cell	153	-0.281575	-1.16978	sva	0.151645	0.538983	0.482277
GO:0044264	cellular polysaccharide metabolic process	79	-0.321829	-1.20823	sva	0.152021	0.538983	0.482277
GO:0051084	'de novo' posttranslational protein folding	31	-0.405843	-1.26517	sva	0.152058	0.538983	0.482277
GO:0048659	smooth muscle cell proliferation	115	-0.297258	-1.1857	sva	0.152102	0.538983	0.482277
GO:0072243	metanephric nephron epithelium development	22	-0.446748	-1.2858	sva	0.15224	0.538983	0.482277
GO:0071548	response to dexamethasone	40	-0.379066	-1.24942	sva	0.152311	0.538983	0.482277
GO:0051204	protein insertion into mitochondrial membrane	31	-0.405659	-1.26459	sva	0.152536	0.538983	0.482277
GO:0070525	tRNA threonylcarbamoyladenosine metabolic process	13	-0.52145	-1.31383	sva	0.152567	0.538983	0.482277
GO:0010498	proteasomal protein catabolic process	407	-0.241919	-1.1208	sva	0.152568	0.538983	0.482277
GO:0034612	response to tumor necrosis factor	252	-0.258772	-1.14259	sva	0.152771	0.538983	0.482277
GO:0033539	fatty acid beta-oxidation using acyl-CoA dehydrogenase	14	0.497531	1.3049	sva	0.152818	0.538983	0.482277
GO:0051349	positive regulation of lyase activity	16	-0.490236	-1.3034	sva	0.15282	0.538983	0.482277
GO:0003197	endocardial cushion development	35	0.378565	1.24834	sva	0.152832	0.538983	0.482277
GO:0051123	RNA polymerase II transcriptional preinitiation complex assembly	33	-0.398826	-1.26101	sva	0.152885	0.538983	0.482277
GO:0045198	establishment of epithelial cell apical/basal polarity	11	-0.548561	-1.32119	sva	0.152927	0.538983	0.482277
GO:0010039	response to iron ion	29	-0.412824	-1.268	sva	0.152931	0.538983	0.482277
GO:0001764	neuron migration	128	-0.291013	-1.1791	sva	0.152979	0.538983	0.482277
GO:0060453	regulation of gastric acid secretion	11	-0.548439	-1.3209	sva	0.153119	0.538983	0.482277
GO:0140058	neuron projection arborization	15	-0.499121	-1.30535	sva	0.153145	0.538983	0.482277
GO:0006534	cysteine metabolic process	13	0.508988	1.30804	sva	0.153303	0.538983	0.482277
GO:0061339	establishment or maintenance of monopolar cell polarity	18	-0.4729	-1.29512	sva	0.153411	0.538983	0.482277
GO:0055076	transition metal ion homeostasis	123	0.279294	1.16705	sva	0.153431	0.538983	0.482277
GO:0051251	positive regulation of lymphocyte activation	222	-0.263877	-1.14872	sva	0.153494	0.538983	0.482277
GO:0044827	modulation by host of viral genome replication	13	-0.520848	-1.31232	sva	0.153511	0.538983	0.482277
GO:0050870	positive regulation of T cell activation	169	-0.276161	-1.16253	sva	0.153568	0.538983	0.482277
GO:0014065	phosphatidylinositol 3-kinase signaling	115	-0.296882	-1.1842	sva	0.15368	0.538983	0.482277
GO:0002220	innate immune response activating cell surface receptor signaling pathway	106	-0.3018	-1.18887	sva	0.153725	0.538983	0.482277
GO:0051145	smooth muscle cell differentiation	49	0.345439	1.22527	sva	0.153789	0.538983	0.482277
GO:0006778	porphyrin-containing compound metabolic process	28	-0.416512	-1.2687	sva	0.153826	0.538983	0.482277
GO:0045940	positive regulation of steroid metabolic process	17	0.467886	1.29218	sva	0.153861	0.538983	0.482277
GO:0072017	distal tubule development	12	-0.533813	-1.31623	sva	0.153871	0.538983	0.482277
GO:0071875	adrenergic receptor signaling pathway	25	-0.429966	-1.27627	sva	0.153883	0.538983	0.482277
GO:0001510	RNA methylation	64	0.323075	1.20778	sva	0.154139	0.538983	0.482277
GO:0003299	muscle hypertrophy in response to stress	21	-0.451918	-1.28557	sva	0.154263	0.538983	0.482277
GO:0014887	cardiac muscle adaptation	21	-0.451918	-1.28557	sva	0.154263	0.538983	0.482277
GO:0014898	cardiac muscle hypertrophy in response to stress	21	-0.451918	-1.28557	sva	0.154263	0.538983	0.482277
GO:0042446	hormone biosynthetic process	72	-0.327999	-1.2116	sva	0.154326	0.538983	0.482277
GO:0060394	negative regulation of pathway-restricted SMAD protein phosphorylation	10	-0.56346	-1.32237	sva	0.154549	0.539199	0.48247
GO:0099024	plasma membrane invagination	43	-0.371332	-1.24256	sva	0.154573	0.539199	0.48247
GO:0006821	chloride transport	92	-0.31061	-1.19598	sva	0.155159	0.540919	0.484009
GO:2001054	negative regulation of mesenchymal cell apoptotic process	10	0.55176	1.31715	sva	0.155487	0.541096	0.484168
GO:2001258	negative regulation of cation channel activity	38	0.36899	1.23937	sva	0.155488	0.541096	0.484168
GO:0043666	regulation of phosphoprotein phosphatase activity	93	-0.309811	-1.1952	sva	0.155488	0.541096	0.484168
GO:0008542	visual learning	40	-0.377727	-1.24501	sva	0.15585	0.542031	0.485005
GO:2000772	regulation of cellular senescence	36	-0.38796	-1.25058	sva	0.156895	0.545231	0.487868
GO:0021537	telencephalon development	219	-0.263849	-1.14676	sva	0.157011	0.545231	0.487868
GO:0070979	protein K11-linked ubiquitination	24	-0.433671	-1.27482	sva	0.157076	0.545231	0.487868
GO:1902358	sulfate transmembrane transport	11	0.534201	1.3107	sva	0.157145	0.545231	0.487868
GO:0071277	cellular response to calcium ion	55	-0.348385	-1.22444	sva	0.157286	0.545394	0.488014
GO:0033173	calcineurin-NFAT signaling cascade	24	-0.433298	-1.27372	sva	0.157832	0.546963	0.489417
GO:0030858	positive regulation of epithelial cell differentiation	54	0.335609	1.21394	sva	0.158048	0.547385	0.489795
GO:0006643	membrane lipid metabolic process	182	-0.271819	-1.15519	sva	0.158284	0.547877	0.490236
GO:0045862	positive regulation of proteolysis	313	-0.249774	-1.12855	sva	0.158798	0.549329	0.491535
GO:0060840	artery development	78	0.306747	1.18948	sva	0.15916	0.549937	0.492078
GO:0044058	regulation of digestive system process	33	-0.39632	-1.25309	sva	0.159162	0.549937	0.492078
GO:0002707	negative regulation of lymphocyte mediated immunity	29	-0.410101	-1.25964	sva	0.159378	0.550039	0.49217
GO:0051056	regulation of small GTPase mediated signal transduction	290	-0.252509	-1.13192	sva	0.159381	0.550039	0.49217
GO:0002385	mucosal immune response	23	-0.437576	-1.27309	sva	0.159604	0.550332	0.492432
GO:0007602	phototransduction	41	-0.373977	-1.23909	sva	0.159655	0.550332	0.492432
GO:0007423	sensory organ development	462	-0.237152	-1.11092	sva	0.159867	0.550626	0.492695
GO:0010883	regulation of lipid storage	36	0.37296	1.23768	sva	0.159929	0.550626	0.492695
GO:1900115	extracellular regulation of signal transduction	15	-0.495282	-1.29531	sva	0.160211	0.550944	0.49298
GO:1900116	extracellular negative regulation of signal transduction	15	-0.495282	-1.29531	sva	0.160211	0.550944	0.49298
GO:0001829	trophectodermal cell differentiation	13	-0.516792	-1.3021	sva	0.160686	0.55095	0.492985
GO:0032096	negative regulation of response to food	11	0.532102	1.30555	sva	0.160736	0.55095	0.492985
GO:0032099	negative regulation of appetite	11	0.532102	1.30555	sva	0.160736	0.55095	0.492985
GO:0061756	leukocyte adhesion to vascular endothelial cell	23	-0.437065	-1.27161	sva	0.160739	0.55095	0.492985
GO:0048608	reproductive structure development	364	0.231319	1.10413	sva	0.160931	0.55095	0.492985
GO:0007016	cytoskeletal anchoring at plasma membrane	10	0.548479	1.30932	sva	0.161128	0.55095	0.492985
GO:0007035	vacuolar acidification	21	-0.448666	-1.27632	sva	0.161142	0.55095	0.492985
GO:2001044	regulation of integrin-mediated signaling pathway	13	0.504607	1.29678	sva	0.161198	0.55095	0.492985
GO:0000097	sulfur amino acid biosynthetic process	12	0.517537	1.30109	sva	0.161281	0.55095	0.492985
GO:0002714	positive regulation of B cell mediated immunity	27	-0.417496	-1.26145	sva	0.161291	0.55095	0.492985
GO:0002891	positive regulation of immunoglobulin mediated immune response	27	-0.417496	-1.26145	sva	0.161291	0.55095	0.492985
GO:0002228	natural killer cell mediated immunity	50	-0.355059	-1.22476	sva	0.161439	0.55095	0.492985
GO:0042775	mitochondrial ATP synthesis coupled electron transport	72	-0.325914	-1.2039	sva	0.16151	0.55095	0.492985
GO:0032984	protein-containing complex disassembly	284	-0.252914	-1.13121	sva	0.161538	0.55095	0.492985
GO:0002090	regulation of receptor internalization	33	-0.395286	-1.24982	sva	0.161671	0.551083	0.493104
GO:0070169	positive regulation of biomineral tissue development	31	-0.40195	-1.25303	sva	0.16178	0.551132	0.493148
GO:0051085	chaperone cofactor-dependent protein refolding	25	-0.426484	-1.26594	sva	0.161875	0.551134	0.493149
GO:0035116	embryonic hindlimb morphogenesis	24	0.417907	1.26076	sva	0.162051	0.551217	0.493224
GO:0045931	positive regulation of mitotic cell cycle	124	-0.290685	-1.17244	sva	0.162207	0.551217	0.493224
GO:0018210	peptidyl-threonine modification	125	-0.290159	-1.17175	sva	0.162236	0.551217	0.493224
GO:0032509	endosome transport via multivesicular body sorting pathway	15	0.481772	1.28745	sva	0.162291	0.551217	0.493224
GO:0050774	negative regulation of dendrite morphogenesis	14	-0.504643	-1.29632	sva	0.162403	0.551217	0.493224
GO:1903322	positive regulation of protein modification by small protein conjugation or removal	101	-0.30272	-1.18351	sva	0.162468	0.551217	0.493224
GO:0010644	cell communication by electrical coupling	26	0.408081	1.25542	sva	0.162772	0.551913	0.493847
GO:0051271	negative regulation of cellular component movement	261	-0.255807	-1.13375	sva	0.16294	0.551913	0.493847
GO:0051131	chaperone-mediated protein complex assembly	17	-0.4759	-1.28501	sva	0.163031	0.551913	0.493847
GO:0045880	positive regulation of smoothened signaling pathway	27	0.40353	1.25275	sva	0.163052	0.551913	0.493847
GO:0048048	embryonic eye morphogenesis	34	0.377613	1.23714	sva	0.163359	0.552486	0.49436
GO:0045124	regulation of bone resorption	32	0.384218	1.24136	sva	0.16342	0.552486	0.49436
GO:0042276	error-prone translesion synthesis	17	-0.475672	-1.28439	sva	0.163506	0.552486	0.49436
GO:0050792	regulation of viral process	179	0.258295	1.13758	sva	0.163733	0.552933	0.494759
GO:1902237	positive regulation of endoplasmic reticulum stress-induced intrinsic apoptotic signaling pathway	10	-0.557728	-1.30892	sva	0.163893	0.55315	0.494954
GO:2000679	positive regulation of transcription regulatory region DNA binding	19	-0.460203	-1.27749	sva	0.164132	0.553549	0.495311
GO:0071333	cellular response to glucose stimulus	107	-0.298678	-1.17833	sva	0.164382	0.553549	0.495311
[truncated: 4,095 more rows]
