# Supplementary material for: The variability of expression of many genes and most functional pathways is observed to increase with age in brain transcriptome data
Source: bioRxiv preprint, doi:10.1101/526491, version 1 (2019-01-22)
Supplement: Supplemental Table 3 [file 526491_file05.xlsx]

## Sheet: regression
Entrez_Gene_ID	Gene_Symbol	Δvar(ρ)	p.value	p.adjust_fdr
11149	BVES	0.327702	5.58696e-05	0.270298
5783	PTPN13	0.328121	5.46022e-05	0.270298
58476	TP53INP2	0.338658	3.03551e-05	0.270298
770	CA11	0.324967	6.48392e-05	0.270298
114884	OSBPL10	0.311041	0.000135524	0.345024
247	ALOX15B	0.309753	0.000144838	0.345024
6614	SIGLEC1	-0.315597	0.000106883	0.345024
23281	MTUS2	0.301933	0.000215481	0.412051
9414	TJP2	0.301302	0.000222396	0.412051
386678	KRTAP10-11	0.297856	0.000263947	0.440131
138240	C9orf57	0.294437	0.000312219	0.45926
64080	RBKS	0.291619	0.000358044	0.45926
81832	NETO1	0.291634	0.000357782	0.45926
57863	CADM3	0.287921	0.000427662	0.475418
63925	ZNF335	0.28902	0.00040576	0.475418
1992	SERPINB1	0.285983	0.00046896	0.488744
159195	USP54	0.280248	0.000613759	0.57641
27233	SULT1C4	-0.279953	0.000622211	0.57641
3281	HSBP1	0.278363	0.000669719	0.579808
5435	POLR2F	0.275465	0.000764965	0.579808
768211	RELL1	0.275597	0.00076036	0.579808
83888	FGFBP2	-0.277256	0.000704732	0.579808
5549	PRELP	0.273327	0.000843083	0.611235
10628	TXNIP	0.26596	0.00117184	0.614824
150946	FAM59B	0.269862	0.000985361	0.614824
23421	ITGB3BP	-0.263119	0.00132736	0.614824
259215	LY6G6F	0.266621	0.00113813	0.614824
27439	CECR6	0.265355	0.00120345	0.614824
51129	ANGPTL4	0.266768	0.00113074	0.614824
54674	LRRN3	0.271683	0.000908038	0.614824
57622	LRFN1	0.264959	0.00122463	0.614824
64795	RMND5A	-0.263644	0.00129726	0.614824
84333	PCGF5	0.265537	0.00119389	0.614824
8932	MBD2	0.270304	0.000966055	0.614824
8997	KALRN	0.263829	0.0012868	0.614824
9448	MAP4K4	0.265726	0.0011422	0.614824
10294	DNAJA2	0.241052	0.00334407	0.628334
10439	OLFM1	0.252839	0.00206111	0.628334
10635	RAD51AP1	0.242155	0.00319895	0.628334
10782	ZNF274	0.249749	0.00228316	0.628334
11101	ATE1	0.240878	0.00336747	0.628334
114134	SLC2A13	0.251082	0.00221834	0.628334
114788	CSMD3	0.23806	0.00376812	0.628334
115196	ZNF554	0.258411	0.0016271	0.628334
12	SERPINA3	0.240504	0.00341833	0.628334
130074	FAM168B	0.247399	0.00258395	0.628334
132884	EVC2	-0.260452	0.00149033	0.628334
1392	CRH	0.259122	0.00157824	0.628334
145581	LRFN5	0.240213	0.00345836	0.628334
145788	FLJ27352	0.247943	0.00252672	0.628334
161394	SAMD15	0.25551	0.00184141	0.628334
199857	ALG14	0.245378	0.00280702	0.628334
23648	SSBP3	0.246405	0.00269152	0.628334
254531	LPCAT4	0.243969	0.00297272	0.628334
256364	EML3	0.247762	0.00254567	0.628334
26824	RNU11	0.249949	0.00232549	0.628334
27166	PRELID1	0.254811	0.00189674	0.628334
27300	ZNF544	0.244906	0.00279305	0.628334
283635	FAM177A1	0.247694	0.00255281	0.628334
285180	RUFY4	-0.245975	0.00273939	0.628334
29118	DDX25	0.248147	0.00250556	0.628334
2995	GYPC	0.253969	0.00196544	0.628334
30819	KCNIP2	0.242273	0.00311154	0.628334
337977	KRTAP21-1	0.25429	0.00188334	0.628334
348327	ZNF530	-0.256205	0.00178784	0.628334
358	AQP1	0.244191	0.00294593	0.628334
360023	ZBTB41	-0.239239	0.0035956	0.628334
3843	IPO5	0.256779	0.00174467	0.628334
386627	FLJ38109	0.240467	0.00334852	0.628334
388886	FAM211B	0.248676	0.00245144	0.628334
401068	LOC401068	-0.23945	0.0035654	0.628334
4014	LOR	0.26038	0.00149496	0.628334
401442	LOC401442	0.23857	0.00369257	0.628334
4534	MTM1	0.243149	0.00307313	0.628334
4644	MYO5A	0.242057	0.00321163	0.628334
54059	YBEY	0.255204	0.00186545	0.628334
55191	NADSYN1	0.258294	0.00163529	0.628334
55471	C2orf56	0.23846	0.00370869	0.628334
55714	ODZ3	0.257172	0.00171568	0.628334
55924	FAM212B	0.244059	0.00296179	0.628334
55964	Septin 3	0.245722	0.00276789	0.628334
56257	MEPCE	0.25024	0.00229755	0.628334
57158	JPH2	0.242718	0.00312711	0.628334
57699	CPNE5	0.251577	0.00217298	0.628334
6094	ROM1	0.240572	0.00340903	0.628334
6193	RPS5	0.261524	0.00142269	0.628334
6559	SLC12A3	0.250032	0.00231747	0.628334
6872	TAF1	0.242019	0.00321653	0.628334
6991	TCTE3	0.252272	0.00211069	0.628334
7074	TIAM1	0.242042	0.00321359	0.628334
7545	ZIC1	0.245291	0.00281699	0.628334
79680	C22orf29	0.25392	0.00196951	0.628334
83543	AIF1L	0.242877	0.00310712	0.628334
8396	PIP4K2B	0.244101	0.0029568	0.628334
8482	SEMA7A	0.238408	0.00371649	0.628334
85461	TANC1	0.240104	0.00347355	0.628334
8887	TAX1BP1	0.246496	0.00268154	0.628334
89796	NAV1	0.239397	0.00357293	0.628334
92259	MRPS36	0.23829	0.00373381	0.628334
93589	CACNA2D4	-0.240576	0.00340851	0.628334
10589	DRAP1	-0.228661	0.00543369	0.645524
10954	PDIA5	0.235019	0.00424821	0.645524
11108	PRDM4	0.232994	0.0045977	0.645524
114798	SLITRK1	0.227301	0.00572281	0.645524
1555	CYP2B6	-0.228271	0.00551505	0.645524
1936	EEF1D	0.235763	0.0041259	0.645524
200058	FLJ23867	-0.229632	0.00523536	0.645524
200942	KLHDC8B	0.235453	0.00417642	0.645524
202658	TRIM39-RPP21	-0.232854	0.00462275	0.645524
2050	EPHB4	0.228419	0.00548411	0.645524
23158	TBC1D9	0.230655	0.00503328	0.645524
23415	KCNH4	-0.233545	0.00450003	0.645524
253714	MMS22L	0.227531	0.00567288	0.645524
2562	GABRB3	0.236027	0.0040832	0.645524
285195	SLC9A9	0.234705	0.00430072	0.645524
285286	LOC285286	0.231989	0.00478055	0.645524
29944	PNMA3	0.234414	0.00434995	0.645524
3638	INSIG1	-0.227565	0.00566554	0.645524
387715	ARMS2	-0.232831	0.00462683	0.645524
390079	OR52E8	0.228661	0.00543369	0.645524
4166	CHST6	0.228075	0.00555653	0.645524
441509	GLRA4	0.227505	0.00567859	0.645524
4948	OCA2	0.230421	0.00507889	0.645524
5019	OXCT1	0.231214	0.0049259	0.645524
51617	HMP19	0.230599	0.00504428	0.645524
53345	TM6SF2	0.235015	0.00424884	0.645524
55608	ANKRD10	-0.234365	0.00435831	0.645524
56254	RNF20	-0.231883	0.00480017	0.645524
5629	PROX1	0.236927	0.003941	0.645524
56341	PRMT8	0.231906	0.00479596	0.645524
57061	HYMAI	0.232095	0.004761	0.645524
57559	STAMBPL1	0.228279	0.00551346	0.645524
6296	ACSM3	0.233398	0.00452594	0.645524
64326	RFWD2	0.227391	0.00570312	0.645524
6795	AURKC	-0.230686	0.00502742	0.645524
692227	SNORD104	0.23101	0.00496484	0.645524
7280	TUBB2A	0.233863	0.00444469	0.645524
7433	VIPR1	0.231721	0.00483045	0.645524
79856	SNX22	0.232922	0.00461055	0.645524
81614	NIPA2	0.22727	0.00572939	0.645524
81788	NUAK2	0.231668	0.00484034	0.645524
84063	KIRREL2	0.227682	0.00564034	0.645524
8454	CUL1	0.229084	0.00534645	0.645524
84867	PTPN5	0.232348	0.00471451	0.645524
85414	SLC45A3	0.232076	0.00476449	0.645524
9271	PIWIL1	-0.228317	0.00550551	0.645524
9650	MTFR1	0.228717	0.00542193	0.645524
9880	ZBTB39	0.236077	0.00407532	0.645524
373	TRIM23	0.226605	0.00587584	0.654562
5329	PLAUR	0.226417	0.00591805	0.654562
784	CACNB3	0.226375	0.00592737	0.654562
100526832	PHOSPHO2-KLHL23	0.225415	0.00614632	0.655568
1066	CES1	0.222408	0.00688003	0.655568
11033	ADAP1	0.222741	0.00679524	0.655568
11341	SCRG1	0.222941	0.00674463	0.655568
117248	GALNTL2	0.223039	0.00671993	0.655568
125	ADH1B	0.224924	0.00626115	0.655568
1362	CPD	0.225786	0.006061	0.655568
1409	CRYAA	0.225778	0.00606273	0.655568
168850	ZNF800	0.224883	0.00627096	0.655568
203197	C9orf91	0.226137	0.00598102	0.655568
23062	GGA2	0.222582	0.00683559	0.655568
23221	RHOBTB2	0.222994	0.00673132	0.655568
254778	C8orf46	0.224244	0.00642331	0.655568
26873	OPLAH	0.222544	0.00674386	0.655568
28996	HIPK2	0.224327	0.0064033	0.655568
29103	DNAJC15	0.225019	0.00623892	0.655568
340152	ZC3H12D	-0.223798	0.00653164	0.655568
387036	GUSBP2	0.223198	0.00668019	0.655568
4628	MYH10	0.223761	0.0065409	0.655568
55829	SELS	0.222454	0.00686841	0.655568
7145	TNS1	0.223134	0.00669625	0.655568
79652	TMEM204	-0.222639	0.00682116	0.655568
80086	TUBA4B	0.224701	0.0063139	0.655568
8507	ENC1	0.22475	0.00630224	0.655568
10528	NOP56	-0.221732	0.0070554	0.662814
57586	SYT13	0.221755	0.00704945	0.662814
6066	RNU2-1	-0.221543	0.00710509	0.662814
9442	MED27	0.221505	0.00711506	0.662814
157574	FBXO16	0.220704	0.00732951	0.670129
427	ASAH1	0.22064	0.00734695	0.670129
5891	MOK	0.220395	0.00741398	0.670129
79073	TMEM109	-0.220319	0.00743472	0.670129
79628	SH3TC2	0.22101	0.0072469	0.670129
90523	MLIP	0.220357	0.00742434	0.670129
11052	CPSF6	0.219711	0.00760352	0.673284
114790	STK11IP	0.219416	0.00768652	0.673284
140465	MYL6B	0.218763	0.00787348	0.673284
255061	TAC4	-0.219919	0.00754547	0.673284
3775	KCNK1	0.218929	0.00782555	0.673284
54681	P4HTM	0.21962	0.00762897	0.673284
5532	PPP3CB	0.218853	0.00784731	0.673284
644168	DRGX	0.218853	0.00784731	0.673284
79751	SLC25A22	0.219212	0.00774445	0.673284
90861	HN1L	0.219529	0.0076545	0.673284
9830	TRIM14	0.218521	0.00794367	0.67582
282770	OR10AG1	0.218018	0.0080913	0.684885
51050	PI15	0.217818	0.0081508	0.686438
26027	ACOT11	0.217569	0.00822545	0.687029
83714	NRIP2	0.21752	0.00824022	0.687029
643783	LOC643783	-0.217244	0.00832362	0.688533
7432	VIP	0.217187	0.00834085	0.688533
9229	DLGAP1	0.216953	0.00841241	0.691019
100505494	ANKRD10-IT1	0.216265	0.0086256	0.69302
158983	H2BFWT	0.216235	0.00863508	0.69302
283403	LOC283403	0.216492	0.00855479	0.69302
84792	C7orf70	0.216205	0.00864457	0.69302
8826	IQGAP1	0.21662	0.0085149	0.69302
100133862	LOC100133862	-0.20883	0.0112555	0.699728
10024	TROAP	0.202317	0.0141152	0.699728
100506870	LOC100506870	0.188211	0.0225649	0.699728
100628315	DNM3OS	0.189714	0.0214937	0.699728
10123	ARL4C	0.189669	0.0215253	0.699728
10147	SUGP2	0.189276	0.0218013	0.699728
1028	CDKN1C	0.196858	0.0169832	0.699728
10301	DLEU1	0.197958	0.0163679	0.699728
10541	ANP32B	0.189952	0.0213282	0.699728
10577	NPC2	0.212544	0.00986465	0.699728
10653	SPINT2	0.188411	0.0224197	0.699728
10675	CSPG5	0.198385	0.0161343	0.699728
10900	RUNDC3A	0.192011	0.0199421	0.699728
10971	YWHAQ	-0.193069	0.0192608	0.699728
11010	GLIPR1	0.188498	0.0223569	0.699728
11135	CDC42EP1	0.197829	0.0164388	0.699728
11143	KAT7	0.203492	0.0134331	0.699728
11185	INMT	0.194814	0.0181807	0.699728
113402	SFT2D1	0.214433	0.0092173	0.699728
1142	CHRNB3	0.187104	0.0233827	0.699728
114294	LACTB	0.196394	0.0172493	0.699728
114904	C1QTNF6	0.207912	0.0116248	0.699728
116135	LRRC3B	0.193847	0.0187725	0.699728
124404	Septin 12	0.189049	0.0219619	0.699728
125150	ZSWIM7	-0.194478	0.0183846	0.699728
126129	CPT1C	0.198524	0.0160584	0.699728
126549	ANKLE1	-0.207712	0.0117068	0.699728
1288	COL4A6	-0.213368	0.00957762	0.699728
130576	LYPD6B	0.189099	0.0217983	0.699728
1356	CP	0.20602	0.0124202	0.699728
139065	SLITRK4	0.199971	0.0152912	0.699728
140578	CHODL	-0.196707	0.0170693	0.699728
140711	C20orf118	0.200104	0.0152227	0.699728
1428	CRYM	0.212918	0.00973337	0.699728
143	PARP4	0.193983	0.0186883	0.699728
146547	PRSS36	-0.192684	0.0195066	0.699728
150864	FAM117B	0.194988	0.0180761	0.699728
151325	MYADML	-0.191358	0.0203734	0.699728
151475	LOC151475	0.188672	0.0222318	0.699728
152007	GLIPR2	0.188906	0.0220641	0.699728
1528	CYB5A	0.207263	0.0118927	0.699728
1539	CYLC2	0.188547	0.0223214	0.699728
158131	OR1Q1	0.190232	0.0211353	0.699728
158293	FAM120AOS	0.193696	0.0188665	0.699728
158381	ATP8B5P	-0.189839	0.0214069	0.699728
158399	ZNF483	0.208585	0.0112344	0.699728
158798	AKAP14	0.190035	0.0212707	0.699728
159296	NKX2-3	0.2007	0.0149169	0.699728
161882	ZFPM1	0.200719	0.0147818	0.699728
162417	NAGS	0.213999	0.00936277	0.699728
162681	C18orf54	0.187334	0.0232103	0.699728
163782	KANK4	0.190134	0.0212029	0.699728
164781	WDR69	0.19973	0.0154172	0.699728
166	AES	0.210444	0.0106314	0.699728
1674	DES	0.21129	0.0103164	0.699728
171023	ASXL1	0.193609	0.0189207	0.699728
171024	SYNPO2	0.19251	0.0196184	0.699728
171546	SPTSSA	0.188762	0.0221667	0.699728
1806	DPYD	0.207489	0.0117986	0.699728
1837	DTNA	0.191947	0.0199841	0.699728
1969	EPHA2	0.213243	0.00962059	0.699728
1981	EIF4G1	-0.187757	0.0228968	0.699728
199746	U2AF1L4	0.190459	0.0209799	0.699728
201798	TIGD4	-0.187493	0.0230923	0.699728
202559	KHDRBS2	0.20888	0.011236	0.699728
2037	EPB41L2	0.190379	0.0210342	0.699728
2043	EPHA4	0.192555	0.0195892	0.699728
2057	EPOR	0.212136	0.00989473	0.699728
2078	ERG	-0.197739	0.016489	0.699728
2168	FABP1	0.193477	0.0190035	0.699728
219927	MRPL21	0.203167	0.0137091	0.699728
221400	TDRD6	0.210738	0.0105208	0.699728
221443	C6orf130	0.194554	0.0183386	0.699728
221662	RBM24	0.191709	0.0201405	0.699728
221895	JAZF1	0.191932	0.019994	0.699728
22822	PHLDA1	0.198895	0.015859	0.699728
22926	ATF6	0.2024	0.014075	0.699728
22974	TPX2	0.187278	0.0232526	0.699728
22996	TTC39A	0.210564	0.0105859	0.699728
23066	CAND2	0.212008	0.0100557	0.699728
23105	FSTL4	0.188781	0.0221532	0.699728
23236	PLCB1	0.212265	0.00996379	0.699728
23255	CCDC165	-0.21407	0.00933859	0.699728
23306	TMEM194A	0.18874	0.022183	0.699728
23355	VPS8	0.188823	0.0221235	0.699728
23467	NPTXR	0.192075	0.0199001	0.699728
23473	CAPN7	-0.187848	0.0228301	0.699728
23516	SLC39A14	0.209824	0.0108674	0.699728
23542	MAPK8IP2	0.189061	0.0219538	0.699728
23587	C17orf81	0.211403	0.0102748	0.699728
23639	LRRC6	0.212831	0.00976373	0.699728
246243	RNASEH1	-0.187236	0.0232836	0.699728
246312	C21orf91-OT1	0.189503	0.0216417	0.699728
2498	FTH1P3	0.196371	0.0172623	0.699728
255403	ZNF718	0.193621	0.0189136	0.699728
256714	MAP7D2	0.198173	0.0162497	0.699728
257101	ZNF683	-0.194746	0.0182218	0.699728
25787	DGCR9	0.194841	0.0181648	0.699728
25932	CLIC4	0.212586	0.00984999	0.699728
25999	CLIP3	0.190919	0.0206671	0.699728
26033	ATRNL1	0.192136	0.0198607	0.699728
26038	CHD5	0.210455	0.0106271	0.699728
260425	MAGI3	0.206363	0.0122723	0.699728
26226	FBXW4P1	0.193987	0.018686	0.699728
26231	LRRC29	-0.188966	0.022021	0.699728
2648	KAT2A	0.199843	0.015358	0.699728
26610	ELP4	-0.187822	0.0228495	0.699728
266812	NAP1L5	0.190712	0.0208076	0.699728
26821	SNORA74A	0.206794	0.0120891	0.699728
26822	SNORD14A	0.20013	0.0152091	0.699728
27067	STAU2	0.202102	0.0142198	0.699728
27124	INPP5J	0.19104	0.0205857	0.699728
27289	RND1	0.206802	0.0120859	0.699728
27304	MOCS3	0.202359	0.0140951	0.699728
2731	GLDC	0.195249	0.0179202	0.699728
27445	PCLO	0.198687	0.0159707	0.699728
282809	POC1B	0.188128	0.0226254	0.699728
283162	OR8B4	0.202314	0.014117	0.699728
283481	LOC283481	0.193832	0.0187819	0.699728
283553	LOC283553	-0.190715	0.020805	0.699728
283576	ZDHHC22	0.195884	0.0175455	0.699728
283738	LOC283738	-0.207856	0.011648	0.699728
2840	GPR17	0.18911	0.0219189	0.699728
284119	PTRF	0.190523	0.0209361	0.699728
284804	LOC284804	0.214939	0.00905033	0.699728
285315	C3orf33	0.208064	0.0115633	0.699728
285605	DTWD2	-0.209801	0.0108761	0.699728
2878	GPX3	0.212979	0.0097123	0.699728
2897	GRIK1	0.194939	0.0181056	0.699728
2916	GRM6	-0.214357	0.00924246	0.699728
2917	GRM7	0.21152	0.010232	0.699728
2949	GSTM5	0.213409	0.00956334	0.699728
2952	GSTT1	0.194814	0.0181807	0.699728
2977	GUCY1A2	0.209877	0.0108471	0.699728
29887	SNX10	0.199809	0.0153757	0.699728
29931	LINC00312	-0.192185	0.0198288	0.699728
3021	H3F3B	0.195676	0.0176674	0.699728
3081	HGD	0.19812	0.0162787	0.699728
3092	HIP1	0.200731	0.0149015	0.699728
3099	HK2	0.187602	0.0230111	0.699728
322	APBB1	0.203772	0.0134266	0.699728
3226	HOXC10	0.195052	0.0180376	0.699728
3294	HSD17B2	-0.204055	0.0132959	0.699728
3299	HSF4	-0.191856	0.0200436	0.699728
333926	PPM1J	0.208298	0.0114685	0.699728
338328	GPIHBP1	0.189499	0.0216444	0.699728
338645	LUZP2	-0.198955	0.0158266	0.699728
339529	LOC339529	0.198936	0.0158367	0.699728
3419	IDH3A	0.190953	0.0206442	0.699728
3426	CFI	0.200243	0.0151506	0.699728
345456	PFN3	0.19744	0.0166551	0.699728
3491	CYR61	-0.193579	0.0189396	0.699728
3568	IL5RA	-0.197236	0.0167695	0.699728
3590	IL11RA	0.196126	0.0172767	0.699728
3606	IL18	-0.186975	0.0234792	0.699728
3636	INPPL1	0.202672	0.0139443	0.699728
3687	ITGAX	0.212302	0.00995035	0.699728
3688	ITGB1	0.199491	0.015542	0.699728
375323	LHFPL4	0.213817	0.00942408	0.699728
375567	VWC2	0.189854	0.0213964	0.699728
375791	C9orf169	-0.197062	0.0168675	0.699728
387521	TMEM189	0.188543	0.0223242	0.699728
388394	RPRML	0.197969	0.0163617	0.699728
388910	LINC00207	0.209159	0.0110075	0.699728
389114	ZNF662	-0.19189	0.0200213	0.699728
389932	tAKR	-0.209911	0.010834	0.699728
390927	ZNF793	0.207323	0.0118675	0.699728
4184	SMCP	0.19636	0.0172689	0.699728
4335	MNT	0.189321	0.0217693	0.699728
4345	CD200	0.214221	0.00928789	0.699728
441168	FAM26F	-0.193677	0.0188783	0.699728
442319	ZNF727	0.194354	0.0184607	0.699728
4650	MYO9B	0.211052	0.0104041	0.699728
4697	NDUFA4	0.19472	0.0182378	0.699728
4745	NELL1	0.189847	0.0214016	0.699728
4798	NFRKB	0.212771	0.0097849	0.699728
4858	NOVA2	0.189401	0.0217134	0.699728
4883	NPR3	0.189004	0.0219941	0.699728
4931	NVL	0.193764	0.0188242	0.699728
5018	OXA1L	0.19061	0.0208769	0.699728
5064	PALM	0.193609	0.0189207	0.699728
51013	EXOSC1	-0.201369	0.0145807	0.699728
51191	HERC5	0.198917	0.0158469	0.699728
51226	COPZ2	0.197977	0.0163575	0.699728
51474	LIMA1	0.201705	0.0144141	0.699728
51808	PHAX	0.195068	0.0180286	0.699728
5266	PI3	0.190455	0.0209825	0.699728
5288	PIK3C2G	-0.188392	0.0224333	0.699728
53358	SHC3	0.203266	0.0136628	0.699728
5368	PNOC	0.21084	0.0104827	0.699728
53826	FXYD6	0.205215	0.0127726	0.699728
53944	CSNK1G1	-0.194184	0.0185649	0.699728
54206	ERRFI1	-0.202533	0.0140113	0.699728
54331	GNG2	0.207399	0.0118362	0.699728
54472	TOLLIP	0.190179	0.0211716	0.699728
54477	PLEKHA5	0.196828	0.0170004	0.699728
54517	PUS7	-0.190353	0.0210523	0.699728
5458	POU4F2	0.195672	0.0176696	0.699728
5465	PPARA	0.200791	0.0148709	0.699728
54704	PDP1	0.198955	0.0158266	0.699728
54741	LEPROT	0.208558	0.0113638	0.699728
54758	KLHDC4	0.20234	0.0141042	0.699728
54820	NDE1	-0.188335	0.0224744	0.699728
54905	CYP2W1	-0.19503	0.0180512	0.699728
54965	PIGX	0.198298	0.0161816	0.699728
54977	SLC25A38	0.194331	0.0184746	0.699728
55116	TMEM39B	0.207912	0.0116248	0.699728
55176	SEC61A2	-0.192933	0.0193472	0.699728
55357	TBC1D2	0.191853	0.0200461	0.699728
55638	SYBU	0.197433	0.0166594	0.699728
55690	PACS1	0.187788	0.0227462	0.699728
55858	TMEM165	0.190632	0.0208615	0.699728
55937	APOM	0.213632	0.00948704	0.699728
56265	CPXM1	0.214293	0.00926388	0.699728
56683	C21orf59	-0.198471	0.0160871	0.699728
5681	PSKH1	-0.190466	0.0209747	0.699728
5682	PSMA1	0.199533	0.0155201	0.699728
56950	SMYD2	0.20823	0.011496	0.699728
56978	PRDM8	0.213704	0.00946258	0.699728
57169	ZNFX1	-0.19727	0.0167504	0.699728
57449	PLEKHG5	0.20381	0.0134091	0.699728
57453	DSCAML1	0.191581	0.0202254	0.699728
57489	ODF2L	-0.197886	0.0164075	0.699728
57569	ARHGAP20	0.201052	0.0147394	0.699728
5757	PTMA	0.189446	0.0216815	0.699728
57623	ZFAT	0.188483	0.0223678	0.699728
57646	USP28	-0.188241	0.0225429	0.699728
57690	TNRC6C	0.197961	0.0163659	0.699728
58190	CTDSP1	0.196265	0.0173235	0.699728
5827	PXMP2	0.195018	0.018058	0.699728
58499	ZNF462	0.201634	0.0144495	0.699728
58524	DMRT3	0.203946	0.0133463	0.699728
586	BCAT1	0.198324	0.0161672	0.699728
5865	RAB3B	-0.203228	0.0136806	0.699728
5885	RAD21	-0.195816	0.0175853	0.699728
5900	RALGDS	0.191683	0.020158	0.699728
5999	RGS4	0.187822	0.0228495	0.699728
6007	RHD	0.197542	0.0165982	0.699728
60561	RINT1	0.188861	0.0220964	0.699728
6120	RPE	0.201312	0.0146089	0.699728
619562	SNORA3	0.190549	0.020918	0.699728
63036	CELA2A	-0.199189	0.0157018	0.699728
6387	CXCL12	-0.19271	0.0194897	0.699728
64065	PERP	0.21078	0.0105052	0.699728
64077	LHPP	0.188728	0.0221911	0.699728
64093	SMOC1	0.214373	0.00923742	0.699728
642475	C8orf73	0.196866	0.0169789	0.699728
64388	GREM2	0.191845	0.020051	0.699728
6447	SCG5	0.208759	0.011284	0.699728
645	BLVRB	0.200496	0.0150208	0.699728
645644	FLJ42627	0.197327	0.0167186	0.699728
6458	SH3GL1P1	-0.190791	0.0207539	0.699728
646024	RAET1K	0.188343	0.0224689	0.699728
6513	SLC2A1	0.198464	0.0160912	0.699728
6545	SLC7A4	0.212559	0.0097449	0.699728
6585	SLIT1	0.206076	0.0123957	0.699728
65982	ZSCAN18	0.204573	0.0130601	0.699728
65985	AACS	0.208853	0.0112465	0.699728
6629	SNRPB2	-0.187047	0.0234252	0.699728
677819	SNORA37	0.208694	0.0113095	0.699728
6855	SYP	0.191599	0.0202129	0.699728
689	BTF3	0.211211	0.0103456	0.699728
6907	TBL1X	0.199091	0.0157541	0.699728
692158	SNORA57	0.192132	0.0198632	0.699728
6943	TCF21	-0.187659	0.0229693	0.699728
6975	TECTB	0.186949	0.0234991	0.699728
7087	ICAM5	0.197841	0.0164325	0.699728
7259	TSPYL1	0.187157	0.023343	0.699728
7278	TUBA3C	0.189567	0.0215967	0.699728
7384	UQCRC1	-0.191229	0.0204591	0.699728
7570	ZNF22	0.18696	0.0234906	0.699728
7704	ZBTB16	0.215189	0.00896908	0.699728
7850	IL1R2	0.19401	0.018672	0.699728
7881	KCNAB1	0.193651	0.0188948	0.699728
79075	DSCC1	0.191834	0.0200585	0.699728
79315	OR7E91P	-0.201819	0.0143583	0.699728
79567	FAM65A	0.200455	0.0150421	0.699728
79649	MAP7D3	0.187531	0.0230643	0.699728
79669	C3orf52	-0.209605	0.0109519	0.699728
79697	C14orf169	0.194697	0.0182515	0.699728
79722	ANKRD55	0.191743	0.0201181	0.699728
7975	MAFK	0.195884	0.0175455	0.699728
79832	QSER1	0.189461	0.0216709	0.699728
799	CALCR	-0.195989	0.0174837	0.699728
79993	ELOVL7	0.202393	0.0140787	0.699728
80022	MYO15B	0.205717	0.0125515	0.699728
80059	LRRTM4	0.198271	0.016196	0.699728
801	CALM1	0.203277	0.0136575	0.699728
80194	TMEM134	0.187822	0.0228495	0.699728
80255	SLC35F5	0.21543	0.00889091	0.699728
8034	SLC25A16	0.207678	0.0117208	0.699728
80346	REEP4	0.189333	0.0217613	0.699728
805	CALM2	0.198222	0.0162229	0.699728
80895	ILKAP	0.205808	0.012512	0.699728
80975	TMPRSS5	0.193643	0.0188995	0.699728
81035	COLEC12	0.193617	0.018916	0.699728
81127	OR4K15	0.187852	0.0228273	0.699728
81696	OR5V1	-0.194029	0.0186603	0.699728
83401	ELOVL3	0.198275	0.016194	0.699728
84171	LOXL4	0.205087	0.0128296	0.699728
84261	FBXW9	0.190258	0.0211171	0.699728
8431	NR0B2	-0.194746	0.0182218	0.699728
84310	C7orf50	0.200489	0.0150247	0.699728
84720	PIGO	0.205215	0.0127726	0.699728
84865	CCDC142	0.200742	0.0148958	0.699728
8538	BARX2	0.203965	0.0133376	0.699728
85403	EAF1	0.203995	0.0133237	0.699728
85509	MBD3L1	0.197421	0.0166657	0.699728
8566	PDXK	0.187886	0.0228023	0.699728
8567	MADD	0.192884	0.0193785	0.699728
8573	CASK	-0.193813	0.0187936	0.699728
8612	PPAP2C	0.200172	0.0151876	0.699728
8618	CADPS	0.203791	0.0134178	0.699728
865	CBFB	0.207504	0.0117924	0.699728
8659	ALDH4A1	0.201108	0.0147109	0.699728
8683	SRSF9	-0.191924	0.019999	0.699728
8702	B4GALT4	-0.200096	0.0152266	0.699728
8729	GBF1	0.207569	0.0117659	0.699728
8821	INPP4B	0.213972	0.00937169	0.699728
883	CCBL1	0.20602	0.0124202	0.699728
8841	HDAC3	0.194848	0.0181602	0.699728
8854	ALDH1A2	0.201082	0.014599	0.699728
8893	EIF2B5	0.20888	0.011236	0.699728
8973	CHRNA6	0.208256	0.0114853	0.699728
8975	USP13	0.192336	0.0197307	0.699728
89853	FAM125B	0.192506	0.0196208	0.699728
90249	UNC5A	0.187108	0.0233798	0.699728
9028	RHBDL1	0.187244	0.023278	0.699728
90639	COX19	-0.187493	0.0230923	0.699728
9066	SYT7	0.190787	0.0207564	0.699728
9079	LDB2	0.208434	0.0114138	0.699728
9101	USP8	-0.192997	0.0193064	0.699728
91107	TRIM47	0.204852	0.0129342	0.699728
91300	R3HDM4	-0.211551	0.010221	0.699728
91433	RCCD1	0.1939	0.0187397	0.699728
91543	RSAD2	-0.197161	0.0168121	0.699728
9180	OSMR	0.191781	0.0200933	0.699728
91942	NDUFAF2	0.19495	0.0180988	0.699728
9278	ZBTB22	0.192725	0.01948	0.699728
9312	KCNB2	0.198226	0.0162208	0.699728
9321	TRIP11	0.190183	0.021169	0.699728
9334	B4GALT5	0.198932	0.0158388	0.699728
93986	FOXP2	0.187833	0.0228412	0.699728
947	CD34	-0.18959	0.0215808	0.699728
9473	C1orf38	0.196061	0.0174418	0.699728
9516	LITAF	0.202442	0.014055	0.699728
956	ENTPD3	0.21152	0.010232	0.699728
957	ENTPD5	0.189095	0.0219297	0.699728
9689	BZW1	-0.205547	0.0126259	0.699728
9708	PCDHGA8	0.196367	0.0172645	0.699728
9819	TSC22D2	0.206386	0.0122626	0.699728
9948	WDR1	0.201528	0.0145018	0.699728
10548	TM9SF1	0.186273	0.0240133	0.69983
143425	SYT9	0.186654	0.023722	0.69983
148213	ZNF681	-0.186254	0.0240278	0.69983
4033	LRMP	0.186246	0.0240336	0.69983
56311	ANKRD7	-0.186424	0.0238976	0.69983
57585	CRAMP1L	-0.186428	0.0238947	0.69983
57634	EP400	0.186575	0.0237823	0.69983
64753	CCDC136	0.186609	0.0237564	0.69983
6884	TAF13	-0.186227	0.0240481	0.69983
79886	C9orf82	-0.186734	0.0236618	0.69983
8288	EPX	-0.186465	0.0238658	0.69983
84941	HSH2D	0.186605	0.0237593	0.69983
9158	FIBP	-0.186333	0.023967	0.69983
526	ATP6V1B2	0.186016	0.0242112	0.70062
6001	RGS10	0.186099	0.024147	0.70062
84916	CIRH1A	0.185974	0.0242433	0.70062
9770	RASSF2	0.186027	0.0242024	0.70062
143162	FRMPD2	-0.1858	0.0243781	0.703296
55799	CACNA2D3	0.185721	0.0244399	0.70386
201266	SLC39A11	0.18551	0.0246052	0.704652
2071	ERCC3	0.185532	0.0245875	0.704652
2300	FOXL1	0.185362	0.0247209	0.704652
348093	RBPMS2	0.185468	0.0246378	0.704652
483	ATP1B3	-0.185404	0.0246882	0.704652
4900	NRGN	0.185377	0.024709	0.704652
55713	ZNF334	-0.185272	0.0247924	0.705482
26013	L3MBTL1	0.185204	0.0248461	0.705806
100526842	RPL17-C18ORF32	0.184743	0.0252126	0.706335
10226	PLIN3	0.184954	0.0250438	0.706335
117246	FTSJ3	0.184848	0.0251281	0.706335
22885	ABLIM3	0.184701	0.0252459	0.706335
284615	ANKRD34A	0.184875	0.025107	0.706335
285189	PLGLA	0.184928	0.0250648	0.706335
376267	RAB15	0.184784	0.0251794	0.706335
4779	NFE2L1	0.185083	0.0249418	0.706335
8664	EIF3D	0.184841	0.0251341	0.706335
135112	NCOA7	0.184316	0.0255563	0.70907
1503	CTPS	0.184357	0.0255227	0.70907
3361	HTR5A	0.184342	0.0255349	0.70907
66000	TMEM108	0.18438	0.0255043	0.70907
94056	SYAP1	-0.184372	0.0255104	0.70907
5607	MAP2K5	0.184161	0.025682	0.711374
51733	UPB1	0.184021	0.0257958	0.713343
63941	NECAB3	0.183741	0.0260249	0.716114
728642	CDK11A	0.183775	0.0259969	0.716114
79919	C2orf54	-0.183798	0.0259783	0.716114
23647	ARFIP2	0.183677	0.0260778	0.716387
1437	CSF2	0.183333	0.0263623	0.718287
170371	C10orf128	0.183394	0.0263121	0.718287
221061	FAM171A1	0.183458	0.0262588	0.718287
26253	CLEC4E	0.183333	0.0263623	0.718287
286077	FAM83H	0.183469	0.0262494	0.718287
51703	ACSL5	0.183058	0.0265925	0.723145
7799	PRDM2	0.183016	0.0266273	0.723145
51643	TMBIM4	-0.182948	0.0266844	0.723517
4774	NFIA	0.182744	0.0268563	0.723816
55276	PGM2	0.182748	0.0268531	0.723816
730	C7	0.182729	0.0268691	0.723816
9783	RIMS3	0.182778	0.0268276	0.723816
65263	PYCRL	0.182623	0.0269586	0.725056
9957	HS3ST1	0.182453	0.0271031	0.727767
10813	UTP14A	0.182381	0.0271642	0.727932
4248	MGAT3	0.182344	0.0271965	0.727932
100529261	CHURC1-FNTB	0.181649	0.0277957	0.728472
114599	SNORD15B	0.181539	0.0278912	0.728472
115727	RASGRP4	0.181312	0.0280896	0.728472
128346	C1orf162	0.182189	0.027329	0.728472
139411	PTCHD1	0.181411	0.0280035	0.728472
151658	LOC151658	-0.181656	0.0277892	0.728472
164380	CSTT	0.181312	0.0280896	0.728472
2038	EPB42	-0.181006	0.0283594	0.728472
222235	FBXL13	-0.180965	0.0283962	0.728472
22849	CPEB3	-0.18166	0.0277859	0.728472
23387	SIK3	0.181562	0.0278714	0.728472
25888	ZNF473	-0.181259	0.0281361	0.728472
344148	NCKAP5	0.181713	0.0277399	0.728472
3707	ITPKB	0.181482	0.0279407	0.728472
389840	MAP3K15	-0.182023	0.0274719	0.728472
4780	NFE2L2	0.181709	0.0277432	0.728472
55839	CENPN	0.182064	0.0274361	0.728472
64215	DNAJC1	0.181063	0.0283093	0.728472
730101	LOC730101	0.181131	0.0282492	0.728472
7454	WAS	0.181312	0.0280896	0.728472
80215	RUNX1-IT1	0.181067	0.0283059	0.728472
83608	C18orf21	0.181762	0.0276973	0.728472
8437	RASAL1	0.181543	0.0278879	0.728472
8558	CDK10	-0.181184	0.0282026	0.728472
92305	TMEM129	-0.181169	0.0282159	0.728472
9517	SPTLC2	0.181029	0.0283393	0.728472
9530	BAG4	0.182075	0.0274264	0.728472
29880	ALG5	0.180893	0.0284599	0.728983
390201	OR10V1	0.180734	0.028601	0.731476
29906	ST8SIA5	0.18064	0.0286854	0.731649
374875	HSD11B1L	0.180583	0.0287361	0.731649
79012	CAMKV	0.180579	0.0287394	0.731649
100130155	LOC100130155	0.179401	0.0298114	0.733093
100506791	LOC100506791	0.178146	0.0309894	0.733093
10712	FAM189B	0.179888	0.0293641	0.733093
10945	KDELR1	-0.17798	0.0311485	0.733093
11078	TRIOBP	0.17968	0.0295541	0.733093
113115	FAM54A	-0.179665	0.029568	0.733093
114659	LRRC37B	0.180315	0.028977	0.733093
115123	2018-03-03	0.177958	0.0311702	0.733093
123920	CMTM3	0.177973	0.0311557	0.733093
1266	CNN3	0.178668	0.030495	0.733093
140	ADORA3	0.179212	0.0299864	0.733093
140628	GATA5	-0.180247	0.0289146	0.733093
1452	CSNK1A1	-0.178415	0.0307342	0.733093
159686	CCDC147	0.179563	0.0296617	0.733093
23246	BOP1	-0.178755	0.0304133	0.733093
23299	BICD2	-0.179518	0.0297034	0.733093
26146	TRAF3IP1	0.179057	0.0301304	0.733093
26284	ERAL1	0.178063	0.0310688	0.733093
26301	GBGT1	0.179008	0.0301763	0.733093
26470	SEZ6L2	0.179423	0.0297905	0.733093
2733	GLE1	-0.178294	0.030849	0.733093
2802	GOLGA3	0.179741	0.0294988	0.733093
302	ANXA2	0.178687	0.0304773	0.733093
303	ANXA2P1	0.180073	0.0291957	0.733093
353137	LCE1F	0.179098	0.0300917	0.733093
389075	RESP18	0.178944	0.0302363	0.733093
400322	HERC2P2	0.178135	0.0310002	0.733093
401303	ZNF815	0.180447	0.028858	0.733093
4128	MAOA	0.179695	0.0295403	0.733093
4292	MLH1	-0.178211	0.0309281	0.733093
5270	SERPINE2	0.179718	0.0295195	0.733093
55844	PPP2R2D	0.17877	0.0303991	0.733093
58472	SQRDL	0.179782	0.0294607	0.733093
5919	RARRES2	0.180175	0.0291033	0.733093
6095	RORA	-0.179163	0.030032	0.733093
64180	DPEP3	0.179208	0.0299899	0.733093
64757		0.178872	0.0303034	0.733093
6632	SNRPD1	0.17942	0.029794	0.733093
6817	SULT1A1	0.178282	0.0308598	0.733093
7373	COL14A1	-0.179083	0.0301058	0.733093
7597	ZBTB25	0.179575	0.0295281	0.733093
7805	LAPTM5	0.17985	0.0293986	0.733093
7855	FZD5	0.178441	0.0307091	0.733093
7942	TFEB	0.17849	0.0306626	0.733093
79742	CXorf36	0.17959	0.0296374	0.733093
81532	MOB2	-0.178434	0.0307163	0.733093
81611	ANP32E	0.179132	0.0300601	0.733093
81844	TRIM56	0.178456	0.0306948	0.733093
8291	DYSF	0.179809	0.0293132	0.733093
8831	SYNGAP1	0.17886	0.030314	0.733093
9123	SLC16A3	0.179975	0.029285	0.733093
9143	SYNGR3	0.17826	0.0308814	0.733093
9515	STXBP5L	0.179676	0.0295576	0.733093
9647	PPM1F	0.178607	0.030552	0.733093
11245	GPR176	0.177795	0.0313264	0.734158
154091	SLC2A12	0.177636	0.0314796	0.734158
1660	DHX9	-0.177659	0.0314577	0.734158
3020	H3F3A	0.177856	0.0312682	0.734158
3059	HCLS1	0.177723	0.0313956	0.734158
8341	HIST1H2BN	0.177636	0.0314796	0.734158
113878	DTX2	0.177281	0.0318248	0.738079
23139	MAST2	0.177346	0.0317622	0.738079
55081	IFT57	0.177327	0.0317806	0.738079
6868	ADAM17	0.177327	0.0317806	0.738079
127703	C1orf216	0.177021	0.0320803	0.738188
1515	CTSL2	0.177066	0.0320357	0.738188
1994	ELAVL1	0.177228	0.0318765	0.738188
392360	CTSL3	0.177005	0.0320951	0.738188
79590	MRPL24	0.177149	0.0319542	0.738188
83482	SCRT1	0.177039	0.0320617	0.738188
65243	ZNF643	0.176919	0.0321807	0.739137
10077	TSPAN32	0.176767	0.03233	0.73951
56302	TRPV5	0.176847	0.0322515	0.73951
653604	HIST2H3D	0.176767	0.03233	0.73951
10060	ABCC9	0.176427	0.032668	0.740135
219537	SMTNL1	-0.176514	0.0325813	0.740135
3790	KCNS3	0.176439	0.0326567	0.740135
402573	C7orf61	0.176526	0.0325701	0.740135
4741	NEFM	0.176552	0.0325437	0.740135
5274	SERPINI1	0.17645	0.0326454	0.740135
729900	LOC729900	0.17648	0.0326152	0.740135
25930	PTPN23	0.176205	0.0328912	0.743452
6470	SHMT1	0.176163	0.032933	0.743452
780	DDR1	0.176148	0.0329482	0.743452
26019	UPF2	-0.176069	0.0330281	0.743757
8313	AXIN2	0.176046	0.0330509	0.743757
10694	CCT8	0.175819	0.0332802	0.745332
54843	SYTL2	-0.175834	0.0332649	0.745332
6280	S100A9	0.175668	0.0334338	0.745332
847	CAT	0.175887	0.0332113	0.745332
8527	DGKD	-0.17571	0.0333915	0.745332
9133	CCNB2	0.175744	0.0333569	0.745332
9400	RECQL5	0.175717	0.0333838	0.745332
100507460	LOC100507460	0.175521	0.0335841	0.747398
133060	OTOP1	0.175366	0.0337428	0.747398
25977	NECAP1	0.175381	0.0337273	0.747398
27153	ZNF777	-0.175434	0.0336731	0.747398
284110	GSDMA	0.175358	0.0337506	0.747398
11094	C9orf7	0.175253	0.0338593	0.74782
284071	C17orf104	-0.17526	0.0338515	0.74782
143379	C10orf82	-0.175071	0.0340464	0.747989
2072	ERCC4	0.175117	0.0339996	0.747989
59352	LGR6	-0.175113	0.0340035	0.747989
6252	RTN1	0.175071	0.0340464	0.747989
100128569	C19orf71	-0.174017	0.0351514	0.748319
10163	WASF2	0.174085	0.0350792	0.748319
10947	AP3M2	0.173658	0.0355345	0.748319
11086	ADAM29	0.174029	0.0351394	0.748319
117289	TAGAP	0.173685	0.0355062	0.748319
125958	OR7D4	0.17435	0.0347996	0.748319
147372	CCBE1	-0.174588	0.0345497	0.748319
1789	DNMT3B	-0.174614	0.034522	0.748319
2135	EXTL2	0.174183	0.0349752	0.748319
220359	TIGD3	0.174206	0.0349512	0.748319
26273	FBXO3	0.174078	0.0350872	0.748319
282808	RAB40AL	0.173836	0.0353446	0.748319
28511	NKIRAS2	0.17424	0.0349152	0.748319
285600	KIAA0825	0.174988	0.0341325	0.748319
29916	SNX11	0.174641	0.0344943	0.748319
338809	C12orf74	0.173802	0.0353809	0.748319
3543	IGLL1	-0.173628	0.035567	0.748319
402	ARL2	-0.173843	0.0353365	0.748319
4143	MAT1A	0.174051	0.0351153	0.748319
54497	HEATR5B	0.174138	0.0350232	0.748319
54947	LPCAT2	0.173911	0.035264	0.748319
56478	EIF4ENIF1	0.174489	0.0346526	0.748319
65990	FAM173A	0.173609	0.0355872	0.748319
776	CACNA1D	0.173753	0.0354334	0.748319
80206	FHOD3	0.174943	0.0341795	0.748319
8022	LHX3	-0.174055	0.0351113	0.748319
80896	NPL	0.174761	0.0343681	0.748319
81300	OR4P4	-0.174807	0.0343208	0.748319
8362	HIST1H4K	0.173843	0.0353365	0.748319
84340	GFM2	0.174788	0.0343405	0.748319
9201	DCLK1	0.174399	0.0347479	0.748319
976	CD97	0.174656	0.0344785	0.748319
9848	MFAP3L	0.173934	0.0352398	0.748319
9978	RBX1	-0.174459	0.0346844	0.748319
11267	SNF8	0.173549	0.0356522	0.748737
6522	SLC4A2	0.173507	0.0356969	0.748737
23471	TRAM1	0.173273	0.0358352	0.750693
10752	CHL1	0.173216	0.0360112	0.752148
115	ADCY9	0.173186	0.036044	0.752148
50808	AK3	-0.173148	0.036085	0.752148
6223	RPS19	0.173194	0.0360358	0.752148
57817	HAMP	-0.173054	0.0361878	0.753347
10003	NAALAD2	0.171671	0.0377203	0.753537
100033428	SNORD116-16	0.171682	0.0377076	0.753537
100529215	ZNF559-ZNF177	0.17175	0.037631	0.753537
10201	NME6	0.172861	0.0363981	0.753537
10623	POLR3C	0.172147	0.0371867	0.753537
10941	UGT2A1	-0.171539	0.0378697	0.753537
11013	TMSB15A	-0.172952	0.036299	0.753537
1121	CHM	0.172321	0.0369934	0.753537
134548	ANKRD43	-0.172468	0.0368303	0.753537
202018	TAPT1	-0.172668	0.0366095	0.753537
2219	FCN1	0.171388	0.0380411	0.753537
23204	ARL6IP1	0.172786	0.0364809	0.753537
255022	CALHM1	0.172272	0.037048	0.753537
285548	LOC285548	-0.171818	0.0375545	0.753537
29904	EEF2K	0.172147	0.0371867	0.753537
29957	SLC25A24	-0.171773	0.0376054	0.753537
3008	HIST1H1E	-0.171664	0.0377289	0.753537
344838	PAQR9	0.171562	0.0378441	0.753537
375719	AQP7P1	0.172461	0.0368386	0.753537
387104	C6orf174	0.172559	0.0367302	0.753537
388946	LOC388946	-0.171739	0.0376437	0.753537
389336	C5orf46	-0.172151	0.0371825	0.753537
399665	FAM102A	-0.171497	0.0379168	0.753537
40	ACCN1	0.17138	0.0380496	0.753537
51412	ACTL6B	0.172789	0.0364768	0.753537
517	ATP5G2	-0.172959	0.0362908	0.753537
5267	SERPINA4	0.171565	0.0378398	0.753537
55671	SMEK1	-0.172865	0.036394	0.753537
5861	RAB1A	0.17163	0.0377672	0.753537
6098	ROS1	0.171834	0.0375375	0.753537
63933	CCDC90A	0.171452	0.0379682	0.753537
80031	SEMA6D	-0.172359	0.0369515	0.753537
8078	USP5	0.172631	0.0366511	0.753537
8204	NRIP1	0.172226	0.0370983	0.753537
84132	USP42	0.172676	0.0366012	0.753537
84279	PRADC1	0.172147	0.0371867	0.753537
8434	RECK	-0.171977	0.0373765	0.753537
84915	C12orf34	0.171988	0.0373638	0.753537
887	CCKBR	0.171569	0.0378355	0.753537
90843	TCEAL8	0.171807	0.0375672	0.753537
91734	IDI2	0.171475	0.0379425	0.753537
10607	TBL3	0.169797	0.0398844	0.753823
10922	FASTK	0.170591	0.0389557	0.753823
112714	TUBA3E	0.169658	0.0399421	0.753823
116841	SNAP47	0.169835	0.0398397	0.753823
121355	GTSF1	-0.170489	0.0390741	0.753823
123803	NTAN1	0.17036	0.0392236	0.753823
128178	EDARADD	-0.169835	0.0398397	0.753823
128434	VSTM2L	0.170923	0.038572	0.753823
1295	COL8A1	0.171059	0.038416	0.753823
134265	AFAP1L1	-0.169597	0.0401217	0.753823
143570	XRRA1	-0.16951	0.040225	0.753823
148808	MFSD4	0.170587	0.0389601	0.753823
150483	TEKT4	0.170058	0.0395772	0.753823
168448	CDC14C	0.170394	0.039184	0.753823
201163	FLCN	-0.169975	0.0396749	0.753823
213	ALB	-0.169657	0.0400499	0.753823
23072	HECW1	0.171146	0.0383166	0.753823
23091	ZC3H13	0.169828	0.0398487	0.753823
23251	KIAA1024	0.169775	0.0399112	0.753823
23452	ANGPTL2	0.170273	0.039325	0.753823
28984	C13orf15	0.169503	0.040234	0.753823
3295	HSD17B4	0.169865	0.0398041	0.753823
338675	OR5AP2	0.170511	0.0390478	0.753823
440078	FAM66C	-0.169926	0.0397328	0.753823
4763	NF1	0.16962	0.0400948	0.753823
51706	CYB5R1	-0.170613	0.0389295	0.753823
55056	FLJ10038	0.170364	0.0392192	0.753823
55251	PCMTD2	-0.170171	0.0394443	0.753823
55707	NECAP2	0.171172	0.0382863	0.753823
57105	CYSLTR2	0.169552	0.0401756	0.753823
5774	PTPN3	0.169605	0.0401127	0.753823
6198	RPS6KB1	0.170145	0.0394753	0.753823
65244	SPATS2	0.171014	0.0383574	0.753823
654	BMP6	0.170829	0.0386807	0.753823
6595	SMARCA2	0.16965	0.0400589	0.753823
6707	SPRR3	-0.170753	0.0387678	0.753823
677793	SNORA2A	0.170893	0.0386068	0.753823
7068	THRB	0.169654	0.0400544	0.753823
7251	TSG101	-0.171237	0.0382131	0.753823
79630	C1orf54	0.170916	0.0385807	0.753823
80095	ZNF606	-0.169775	0.0399112	0.753823
80830	APOL6	0.170829	0.0386807	0.753823
81931	ZNF93	0.170583	0.0389645	0.753823
84634	KISS1R	-0.169994	0.0396527	0.753823
84964	ALKBH6	0.170836	0.038672	0.753823
90557	CCDC74A	0.17084	0.0386677	0.753823
92667	C20orf72	0.171044	0.0384333	0.753823
9615	GDA	0.170636	0.0389032	0.753823
10716	TBR1	0.168974	0.0408681	0.753844
10776	ARPP19	0.169136	0.0406724	0.753844
11223	MST1P9	0.169064	0.0407588	0.753844
254128	LOC254128	0.169163	0.0406407	0.753844
26063	DECR2	0.169238	0.04055	0.753844
2768	GNA12	0.169	0.0408362	0.753844
4901	NRL	-0.169185	0.0406134	0.753844
55410	NCRNA00185	0.169446	0.0403016	0.753844
56242	ZNF253	0.168993	0.0408453	0.753844
5673	PSG5	0.169423	0.0403286	0.753844
57474	ZNF490	-0.169287	0.0404912	0.753844
60370	AVPI1	0.169057	0.0407679	0.753844
9024	BRSK2	0.16917	0.0406316	0.753844
9737	GPRASP1	0.169321	0.0404505	0.753844
3576	IL8	-0.168932	0.0409182	0.753935
25928	SOSTDC1	0.168883	0.0409776	0.754196
124751	KRBA2	0.168301	0.0416863	0.755184
23531	MMD	0.168411	0.0415521	0.755184
254099	LOC254099	-0.168501	0.0414412	0.755184
2939	GSTA2	-0.168626	0.0412893	0.755184
340719	NANOS1	0.168316	0.0416678	0.755184
51084	CRYL1	0.168245	0.0417559	0.755184
54499	TMCO1	0.168256	0.041742	0.755184
56833	SLAMF8	0.168369	0.0416029	0.755184
57521	RPTOR	0.168569	0.0413583	0.755184
7705	ZNF146	0.168286	0.0417048	0.755184
79576	NKAP	0.168286	0.0417048	0.755184
83752	LONP2	0.168498	0.0414459	0.755184
84293	C10orf58	0.16846	0.041492	0.755184
84678	KDM2B	-0.168501	0.0414412	0.755184
8601	RGS20	0.168668	0.0412387	0.755184
93210	PGAP3	-0.168369	0.0414979	0.755184
2	A2M	0.168093	0.0419419	0.755439
2185	PTK2B	0.16815	0.0418721	0.755439
23161	SNX13	0.168097	0.0419372	0.755439
84517	ARPM1	0.168086	0.0419512	0.755439
100506696	LOC100506696	0.168003	0.0420538	0.755655
56953	NT5M	0.168025	0.0420258	0.755655
10044	SH2D3C	0.167123	0.0431537	0.756578
10155	TRIM28	-0.166511	0.0439325	0.756578
10724	MGEA5	0.166461	0.0439956	0.756578
10807	SDCCAG3	-0.166454	0.0440053	0.756578
120863	DEPDC4	-0.167723	0.0424006	0.756578
1394	CRHR1	0.167527	0.0426457	0.756578
140901	STK35	-0.166133	0.0444192	0.756578
142679	DUSP19	0.166235	0.0442873	0.756578
170850	KCNG3	0.166163	0.0443801	0.756578
1757	SARDH	0.16727	0.0429679	0.756578
1805	DPT	-0.167157	0.0431108	0.756578
199731	CADM4	0.16662	0.0437923	0.756578
2040	STOM	0.166643	0.0437633	0.756578
221035	REEP3	0.167466	0.0427213	0.756578
2261	FGFR3	0.167512	0.0426646	0.756578
22836	RHOBTB3	0.167459	0.0427308	0.756578
2301	FOXE3	-0.167682	0.0424523	0.756578
23429	RYBP	0.16676	0.0436138	0.756578
23646	PLD3	0.167013	0.0432923	0.756578
257313	UTS2D	-0.166155	0.0443898	0.756578
26173	INTS1	0.167485	0.0426976	0.756578
2675	GFRA2	0.16764	0.0425041	0.756578
27089	UQCRQ	0.166597	0.0438213	0.756578
29086	BABAM1	0.166998	0.0433114	0.756578
3270	HRC	0.166813	0.0435465	0.756578
3363	HTR7	0.167364	0.0428492	0.756578
348120	LOC348120	0.16665	0.0437536	0.756578
352909	C19orf51	0.167153	0.0431155	0.756578
374955	SPATA21	0.166941	0.0433833	0.756578
3995	FADS3	0.166171	0.0443703	0.756578
50613	UBQLN3	0.166174	0.0443654	0.756578
51027	BOLA1	-0.166371	0.0441121	0.756578
55970	GNG12	0.166609	0.0438068	0.756578
57538	ALPK3	-0.166726	0.0436572	0.756578
57706	DENND1A	0.167262	0.0429775	0.756578
606495	CYB5RL	-0.167738	0.0423818	0.756578
6257	RXRB	-0.167829	0.0422691	0.756578
64386	MMP25	0.167194	0.0430631	0.756578
6558	SLC12A2	0.16628	0.0442289	0.756578
6611	SMS	0.166522	0.043918	0.756578
677805	SNORA18	0.16673	0.0436524	0.756578
728609	SDHAP3	0.166356	0.0441315	0.756578
7873	MANF	0.167236	0.0430107	0.756578
80762	NDFIP1	0.167232	0.0430155	0.756578
84435	GPR123	-0.167153	0.0431155	0.756578
84445	LZTS2	0.167463	0.042726	0.756578
9168	TMSB10	0.166896	0.0434408	0.756578
9215	LARGE	0.166488	0.0439616	0.756578
9669	EIF5B	0.166325	0.0441704	0.756578
9777	TM9SF4	-0.167168	0.0430965	0.756578
9810	RNF40	0.167772	0.0423395	0.756578
10369	CACNG2	0.165604	0.045108	0.757963
10400	PEMT	0.165864	0.0447674	0.757963
112937	GLB1L3	-0.165966	0.0446347	0.757963
114897	C1QTNF1	0.165645	0.0450536	0.757963
145282	MIPOL1	-0.165751	0.0449152	0.757963
1807	DPYS	0.165728	0.0449448	0.757963
195827	C9orf21	0.165895	0.044629	0.757963
3613	IMPA2	0.165562	0.0451625	0.757963
389023	LOC389023	0.16583	0.0448117	0.757963
4921	DDR2	0.165744	0.0449251	0.757963
5170	PDPK1	0.165664	0.0450288	0.757963
5300	PIN1	0.165853	0.0447822	0.757963
84881	RPUSD4	0.165547	0.0451823	0.757963
89781	HPS4	-0.165925	0.0446887	0.757963
92070	C4orf42	0.165642	0.0450585	0.757963
113278	C20orf54	0.165453	0.0453065	0.758144
1615	DARS	0.164886	0.0460571	0.758144
30812	SOX8	0.165173	0.0456755	0.758144
387694	SH2D4B	0.165128	0.0457356	0.758144
3936	LCP1	0.165018	0.0458811	0.758144
4114	MAGEB3	-0.165124	0.0457406	0.758144
5145	PDE6A	0.16537	0.0454159	0.758144
51750	RTEL1	0.164799	0.0461732	0.758144
54514	DDX4	0.164984	0.0459263	0.758144
55124	PIWIL2	0.164897	0.046042	0.758144
55140	ELP3	0.165502	0.0452419	0.758144
594837	SNORD101	0.164886	0.0460571	0.758144
6166	RPL36AL	0.164871	0.0460773	0.758144
79154	DHRS11	0.165411	0.0453612	0.758144
79269	DCAF10	0.165358	0.0454309	0.758144
79575	ABHD8	0.164784	0.0460972	0.758144
8091	HMGA2	0.164784	0.0461934	0.758144
83596	BCL2L12	0.165222	0.0456105	0.758144
8888	MCM3AP	0.164886	0.0460571	0.758144
92922	CCDC102A	0.164894	0.0460471	0.758144
9733	SART3	0.164814	0.046153	0.758144
975	CD81	0.164969	0.0459464	0.758144
124995	MRPL10	0.164735	0.0462591	0.758476
27097	TAF5L	-0.164701	0.0463046	0.758477
5791	PTPRE	-0.164663	0.0463552	0.758561
3479	IGF1	0.164508	0.0465634	0.760474
389856	USP27X	0.164508	0.0465634	0.760474
4781	NFIB	0.164459	0.0466295	0.760809
8123	PAR5	0.164425	0.0466753	0.760813
165545	DQX1	0.164153	0.0470434	0.761028
340706	VWA2	-0.164146	0.0470537	0.761028
344595	LOC344595	0.164187	0.0469973	0.761028
3761	KCNJ4	0.164334	0.0467978	0.761028
51148	CERCAM	0.164278	0.0468744	0.761028
582	BBS1	0.164198	0.0469819	0.761028
79139	DERL1	-0.16427	0.0468846	0.761028
83931	STK40	-0.164357	0.0467671	0.761028
10924	SMPDL3A	0.164006	0.0472438	0.762135
9200	PTPLA	0.164032	0.0472078	0.762135
9454	HOMER3	0.163994	0.0472592	0.762135
10350	ABCA9	0.1639	0.0473881	0.762483
118813	ZFYVE27	0.163696	0.0476674	0.762483
126119	JOSD2	0.163613	0.0477816	0.762483
140679	SLC32A1	0.163564	0.0478492	0.762483
149086	LOC149086	0.163556	0.0478596	0.762483
285972	LOC285972	-0.163553	0.047772	0.762483
375057	C1orf95	0.16362	0.0477712	0.762483
4692	NDN	0.163552	0.0478648	0.762483
51729	WBP11	0.16393	0.0473468	0.762483
6227	RPS21	0.163651	0.0477297	0.762483
80761	UPK3B	0.16367	0.0477038	0.762483
8916	HERC3	0.163666	0.0477089	0.762483
9583	ENTPD4	0.163545	0.0478752	0.762483
100506365	LOC100506365	-0.163201	0.0483508	0.763375
10396	ATP8A1	-0.16339	0.048089	0.763375
116844	LRG1	0.163167	0.0483981	0.763375
152404	IGSF11	0.163216	0.0483298	0.763375
23608	MKRN1	-0.163409	0.0480629	0.763375
25921	ZDHHC5	0.16319	0.0483666	0.763375
2743	GLRB	0.163333	0.0481674	0.763375
2785	GNG3	0.163288	0.0482302	0.763375
4313	MMP2	0.163141	0.0484348	0.763375
7005	TEAD3	0.163401	0.0480734	0.763375
79955	PDZD7	0.163345	0.0481517	0.763375
219854	TMEM218	0.163016	0.0486085	0.765389
170589	GPHA2	-0.162922	0.0487404	0.766742
118611	C10orf90	0.16265	0.049122	0.76682
1783	DYNC1LI2	0.162808	0.0488991	0.76682
201191	SAMD14	0.162687	0.0490689	0.76682
254050	LRRC43	0.162623	0.0491593	0.76682
26787	SNORD61	0.162872	0.0488091	0.76682
29127	RACGAP1	0.162801	0.0489097	0.76682
4129	MAOB	0.162702	0.0490476	0.76682
55071	C9orf40	0.16277	0.0489521	0.76682
57674	RNF213	0.162706	0.0490423	0.76682
26796	SNORD53	0.162551	0.0492604	0.767129
280636	C11orf31	0.162544	0.0492711	0.767129
55151	TMEM38B	0.162483	0.0493564	0.767741
51079	NDUFA13	-0.162393	0.0494847	0.769019
10936	GPR75	0.162136	0.0498496	0.770465
284325	C19orf54	0.162132	0.049855	0.770465
284385	LOC284385	0.162181	0.049785	0.770465
3708	ITPR1	0.162226	0.0497206	0.770465
3909	LAMA3	-0.162151	0.0498281	0.770465
55905	RNF114	0.162189	0.0497743	0.770465
113419	TEX261	0.16209	0.0499142	0.770666
23354	HAUS5	0.162019	0.0500167	0.771534
134526	ACOT12	0.161913	0.050168	0.771681
284323	ZNF780A	0.161901	0.0501842	0.771681
6274	S100A3	0.161883	0.0502113	0.771681
79155	TNIP2	0.16192	0.0501572	0.771681
10544	PROCR	0.161724	0.0504392	0.771709
10840	ALDH1L1	0.161739	0.0504174	0.771709
4224	MEP1A	-0.161837	0.0502763	0.771709
56943	ENY2	0.161682	0.050499	0.771709
6461	SHB	0.161781	0.0503577	0.771709
8365	HIST1H4H	-0.161686	0.0504936	0.771709
8387	OR1E1	0.161656	0.0505371	0.771709
84991	RBM17	0.161588	0.0506352	0.772499
2766	GMPR	0.161531	0.050717	0.772917
5514	PPP1R10	-0.161505	0.0507553	0.772917
150368	FAM109B	-0.161221	0.0511664	0.773456
23258	DENND5A	0.161365	0.0509578	0.773456
23265	EXOC7	-0.161293	0.051062	0.773456
23769	FLRT1	0.161323	0.0510181	0.773456
2533	FYB	0.161274	0.0510895	0.773456
284069	FAM171A2	0.161169	0.0512435	0.773456
347746	PAR-SN	0.161161	0.0512545	0.773456
51310	SLC22A17	0.161184	0.0512214	0.773456
55793	FAM63A	0.161403	0.050903	0.773456
684959	SNORA25	0.161327	0.0510126	0.773456
100289388	LOC100289388	0.159805	0.0532639	0.774857
100532736	C1orf151-NBL1	0.160107	0.0528106	0.774857
114815	SORCS1	0.159642	0.0535089	0.774857
115708	TRMT61A	-0.159525	0.0536862	0.774857
126075	CCDC159	0.160364	0.0524278	0.774857
1359	CPA3	-0.1605	0.052226	0.774857
146310	RNF151	-0.160549	0.0521533	0.774857
163131	ZNF780B	0.160311	0.0525064	0.774857
1979	EIF4EBP2	0.160621	0.0520472	0.774857
2254	FGF9	0.160572	0.0521198	0.774857
2335	FN1	0.160409	0.0523604	0.774857
23504	RIMBP2	0.15965	0.0534975	0.774857
23619	ZIM2	-0.161002	0.0514863	0.774857
25988	HINFP	0.160175	0.052709	0.774857
26102	DKFZP434A062	0.160115	0.0527993	0.774857
26119	LDLRAP1	0.160028	0.0529293	0.774857
2644	GCHFR	-0.160288	0.0525401	0.774857
2646	GCKR	0.160319	0.0524951	0.774857
2869	GRK5	0.160557	0.0521422	0.774857
29995	LMCD1	0.160696	0.0519358	0.774857
356	FASLG	0.159601	0.0535718	0.774857
3597	IL13RA1	0.159843	0.0532071	0.774857
388125	C2CD4B	0.160976	0.051525	0.774857
388419	BTBD17	-0.160417	0.0523492	0.774857
4282	MIF	0.159321	0.053996	0.774857
4793	NFKBIB	0.159899	0.0531219	0.774857
5058	PAK1	0.159903	0.0531162	0.774857
5076	PAX2	-0.160088	0.0528388	0.774857
5333	PLCD1	0.159763	0.0533265	0.774857
54958	TMEM160	0.160405	0.052366	0.774857
5524	PPP2R4	0.160795	0.0517911	0.774857
56623	INPP5E	-0.159616	0.0535489	0.774857
57404	CYP20A1	0.159491	0.0537377	0.774857
57551	TAOK1	0.160413	0.0522715	0.774857
57717	PCDHB16	-0.160772	0.0518245	0.774857
58475	MS4A7	0.160247	0.052602	0.774857
5954	RCN1	0.159963	0.0530255	0.774857
6299	SALL1	0.159382	0.053904	0.774857
6304	SATB1	0.160628	0.0520361	0.774857
6345	SRL	0.160319	0.0524951	0.774857
64081	PBLD	0.160829	0.0517411	0.774857
6448	SGSH	0.159397	0.0538811	0.774857
64782	AEN	0.159537	0.053669	0.774857
6812	STXBP1	0.159892	0.0531333	0.774857
7105	TSPAN6	0.160874	0.0516746	0.774857
78986	DUSP26	0.159639	0.0535147	0.774857
79009	DDX50	0.159601	0.0535718	0.774857
79660	PPP1R3B	0.159336	0.053973	0.774857
79713	IGFLR1	0.15934	0.0539673	0.774857
8000	PSCA	-0.160885	0.0516579	0.774857
84861	KLHL22	0.159861	0.0531787	0.774857
84874	ZNF514	0.159469	0.0537721	0.774857
85001	MGC16275	0.16098	0.0515195	0.774857
85442	KNDC1	0.159948	0.0530482	0.774857
8945	BTRC	0.15954	0.0536633	0.774857
90134	KCNH7	-0.159457	0.0537893	0.774857
9854	C2CD2L	0.160047	0.052901	0.774857
55082	ARGLU1	0.159215	0.0541572	0.775747
677813	SNORA30	0.159189	0.0541976	0.775747
8760	CDS2	0.159204	0.0541745	0.775747
26147	PHF19	0.159102	0.0543305	0.776509
4035	LRP1	-0.159064	0.0543883	0.776509
550631	CCDC157	0.158981	0.0544371	0.776509
7223	TRPC4	-0.159057	0.0543999	0.776509
10096	ACTR3	0.158902	0.0546376	0.776711
1084	CEACAM3	-0.158921	0.0546085	0.776711
146206	RLTPR	0.158943	0.0545737	0.776711
29967	LRP12	0.158974	0.0545273	0.776711
100169755	RN5S4	0.157931	0.0561472	0.776866
100271715	ARHGEF33	0.157927	0.0561532	0.776866
10614	HEXIM1	0.157965	0.0560938	0.776866
10791	VAMP5	0.158074	0.0559219	0.776866
112609	MRAP2	0.15883	0.054748	0.776866
114836	SLAMF6	-0.158048	0.0559633	0.776866
146167	SLC38A8	0.157946	0.0561235	0.776866
1463	NCAN	0.15784	0.0562899	0.776866
146923	RUNDC1	0.157916	0.056171	0.776866
150356	CHADL	0.158702	0.0549461	0.776866
170960	ZNF721	0.157946	0.0561235	0.776866
23114	NFASC	0.158127	0.055839	0.776866
23514	KIAA0146	0.158078	0.0559159	0.776866
255631	COL24A1	0.157825	0.0563138	0.776866
2690	GHR	0.158237	0.0556677	0.776866
283683	LOC283683	0.158739	0.0548878	0.776866
285834	HCG22	-0.158411	0.055397	0.776866
286184	LOC286184	0.158671	0.0549928	0.776866
29956	CERS2	0.158331	0.0555204	0.776866
3082	HGF	0.158482	0.0552854	0.776866
3551	IKBKB	0.157935	0.0561413	0.776866
3598	IL13RA2	0.15804	0.0559752	0.776866
3739	KCNA4	0.158097	0.0558863	0.776866
4001	LMNB1	0.158173	0.0557681	0.776866
4076	CAPRIN1	0.158819	0.0547655	0.776866
4149	MAX	0.158097	0.0558863	0.776866
440560	PRAMEF11	0.158158	0.0557917	0.776866
51187	RSL24D1	0.158192	0.0557386	0.776866
5562	PRKAA1	-0.157818	0.0563257	0.776866
57826	RAP2C	-0.158554	0.0551741	0.776866
6491	STIL	0.158305	0.0555617	0.776866
65975	STK33	0.158169	0.055774	0.776866
687	KLF9	0.158237	0.0556677	0.776866
7164	TPD52L1	0.157889	0.0562126	0.776866
8208	CHAF1B	0.15784	0.0562899	0.776866
8458	TTF2	0.158592	0.0551156	0.776866
10814	CPLX2	-0.157784	0.0563793	0.776963
9610	RIN1	0.157674	0.0565524	0.778704
150696	PROM2	0.157553	0.0567439	0.778769
153364	MBLAC2	0.157572	0.0567139	0.778769
5473	PPBP	-0.157602	0.056666	0.778769
5613	PRKX	0.157617	0.0566421	0.778769
2128	EVX1	0.157478	0.0568638	0.779133
5176	SERPINF1	0.157493	0.0568398	0.779133
29922	NME7	0.157417	0.05696	0.779809
10992	SF3B2	-0.156884	0.0578128	0.780453
11163	NUDT4	0.156665	0.0581666	0.780453
120379	PIH1D2	-0.157085	0.057491	0.780453
145957	NRG4	0.156745	0.0580383	0.780453
23399	CTDNEP1	0.156673	0.0581544	0.780453
2359	FPR3	-0.15707	0.0575152	0.780453
2717	GLA	-0.156601	0.0582707	0.780453
375513	GUSBP4	0.156673	0.0581544	0.780453
388743	CAPN8	0.157274	0.0571888	0.780453
4293	MAP3K9	0.156722	0.058075	0.780453
5026	P2RX5	0.157315	0.0571225	0.780453
51134	CCDC41	0.156922	0.057752	0.780453
51678	MPP6	-0.156918	0.057758	0.780453
51806	CALML5	0.156745	0.0580383	0.780453
54876	DCAF16	-0.157311	0.0571285	0.780453
5526	PPP2R5B	0.156616	0.0582462	0.780453
5970	RELA	-0.156873	0.057831	0.780453
64342	HS1BP3	0.157002	0.0576244	0.780453
64710	NUCKS1	0.156911	0.0577702	0.780453
64769	MEAF6	0.156832	0.057898	0.780453
64770	CCDC14	-0.156696	0.0581177	0.780453
6877	TAF5	0.157066	0.0575213	0.780453
7166	TPH1	-0.156779	0.0579834	0.780453
79364	ZXDC	0.156639	0.0582095	0.780453
79953	SYNDIG1	0.156764	0.0580078	0.780453
8506	CNTNAP1	0.157096	0.0574728	0.780453
85406	DNAJC14	0.156737	0.0580505	0.780453
1785	DNM2	0.156548	0.0583565	0.780975
284116	KRT42P	0.15648	0.058467	0.781826
129025	ZNF280A	0.156356	0.05867	0.78236
55267	C22orf26	0.15634	0.0586946	0.78236
64285	RHBDF1	0.15639	0.0586145	0.78236
9627	SNCAIP	-0.156359	0.0586638	0.78236
26045	LRRTM2	0.156265	0.0588179	0.782753
4926	NUMA1	0.156265	0.0588179	0.782753
285419	LOC285419	-0.156072	0.0591334	0.786109
81448	OR6K2	-0.156053	0.0591645	0.786109
117854	TRIM6	-0.155959	0.0593197	0.78619
1298	COL9A2	0.155536	0.0600192	0.78619
153830	RNF145	0.155683	0.0597749	0.78619
22874	PLEKHA6	0.155846	0.0595064	0.78619
23211	ZC3H4	0.155872	0.0594628	0.78619
23623	RUSC1	0.155517	0.0600506	0.78619
253982	ASPHD1	0.155422	0.0602078	0.78619
25939	SAMHD1	-0.155479	0.0601135	0.78619
26086	GPSM1	0.155422	0.0602078	0.78619
27336	HTATSF1	-0.155577	0.0599502	0.78619
4140	MARK3	-0.155441	0.0601763	0.78619
4677	NARS	0.155842	0.0595126	0.78619
5525	PPP2R5A	0.155721	0.0597124	0.78619
57534	MIB1	0.155494	0.0600883	0.78619
59349	KLHL12	0.155808	0.0595688	0.78619
64122	FN3K	0.15554	0.060013	0.78619
81706	PPP1R14C	0.155479	0.0601135	0.78619
8239	USP9X	0.155524	0.0600381	0.78619
8349	HIST2H2BE	0.1558	0.0595812	0.78619
85465	EPT1	0.155502	0.0600758	0.78619
89822	KCNK17	0.155774	0.0596249	0.78619
9894	TELO2	0.155721	0.0597124	0.78619
79857	FLJ13224	0.155392	0.0602581	0.786232
100033451	SNORD115-14	0.150757	0.0684018	0.786461
10018	BCL2L11	0.15379	0.062977	0.786461
100270746	LOC100270746	0.151195	0.0675954	0.786461
100505566	LOC100505566	-0.153458	0.0635538	0.786461
10075	HUWE1	0.154251	0.0621846	0.786461
10110	SGK2	0.149846	0.0701023	0.786461
10161	LPAR6	0.152117	0.0659244	0.786461
10241	CALCOCO2	0.150711	0.0684857	0.786461
10270	AKAP8	0.152362	0.065485	0.786461
10361	NPM2	0.152351	0.0655053	0.786461
10368	CACNG3	0.151135	0.0677062	0.786461
10409	BASP1	0.153216	0.0639759	0.786461
10445	MCRS1	0.149676	0.0704236	0.786461
10570	DPYSL4	0.150292	0.0692655	0.786461
10682	EBP	0.153991	0.0626318	0.786461
10817	FRS3	0.154905	0.0610749	0.786461
10825	NEU3	-0.154062	0.0625084	0.786461
10849	CD3EAP	-0.151898	0.0663185	0.786461
10987	COPS5	0.152419	0.065384	0.786461
11274	USP18	0.153828	0.0629118	0.786461
11278	KLF12	0.154368	0.0619845	0.786461
115827	RAB3C	0.152158	0.0658499	0.786461
1182	CLCN3	-0.152876	0.0645734	0.786461
119180	LYZL2	-0.154074	0.0624889	0.786461
123970	C16orf78	-0.154293	0.0621135	0.786461
126272	EID2B	0.15271	0.0648672	0.786461
128989	C22orf25	0.153994	0.0626253	0.786461
129642	MBOAT2	-0.149963	0.0698817	0.786461
1315	COPB1	0.154905	0.0610749	0.786461
132851	SPATA4	-0.15047	0.0688892	0.786461
133491	C5orf47	-0.155011	0.0608969	0.786461
134637	ADAT2	0.153991	0.0626318	0.786461
135935	NOBOX	0.149525	0.0707103	0.786461
142940	TRUB1	0.154368	0.0619845	0.786461
1431	CS	0.152997	0.0643605	0.786461
143684	FAM76B	-0.150896	0.0681437	0.786461
144571	LOC144571	0.150073	0.0696758	0.786461
1454	CSNK1E	-0.151195	0.0675954	0.786461
146556	C16orf89	0.154542	0.0616887	0.786461
1487	CTBP1	0.151871	0.0663662	0.786461
150185	LOC150185	0.152566	0.0651218	0.786461
150383	C22orf40	-0.150273	0.0693008	0.786461
152185	SPICE1	-0.151135	0.0677062	0.786461
161502	C15orf26	0.154682	0.0614515	0.786461
164832	LONRF2	0.152362	0.065485	0.786461
1773	DNASE1	0.152721	0.0648472	0.786461
1808	DPYSL2	-0.152627	0.0650145	0.786461
1826	DSCAM	0.150753	0.0684088	0.786461
1854	DUT	0.150522	0.068836	0.786461
1915	EEF1A1	0.151509	0.0670231	0.786461
200634	KRTCAP3	-0.151841	0.0664208	0.786461
202500	TCTE1	0.154478	0.0617979	0.786461
2124	EVI2B	0.149638	0.0704952	0.786461
2175	FANCA	0.150919	0.068102	0.786461
2199	FBLN2	0.150904	0.0681298	0.786461
2252	FGF7	0.153246	0.063923	0.786461
22818	COPZ1	0.150352	0.0691526	0.786461
22845	DOLK	0.154814	0.0612279	0.786461
22990	PCNX	0.155166	0.0606369	0.786461
23061	TBC1D9B	-0.154198	0.0622751	0.786461
23133	PHF8	0.154013	0.0625928	0.786461
23199	KIAA0182	0.154025	0.0625733	0.786461
2321	FLT1	0.150001	0.0698106	0.786461
23253	ANKRD12	0.149627	0.0705167	0.786461
23326	USP22	0.151894	0.0663253	0.786461
23400	ATP13A2	0.15475	0.0613364	0.786461
23430	TPSD1	-0.153186	0.0640288	0.786461
23450	SF3B3	-0.149831	0.0701308	0.786461
23464	GCAT	-0.151641	0.066783	0.786461
23511	NUP188	0.15495	0.0609986	0.786461
2532	DARC	0.155048	0.0608334	0.786461
25912	C1orf43	0.150107	0.069612	0.786461
26048	ZNF500	-0.151335	0.0673398	0.786461
26658	OR7C2	0.150137	0.0695553	0.786461
26779	SNORA69	0.149525	0.0707103	0.786461
26872	STEAP1	0.149661	0.0704523	0.786461
2688	GH1	0.153311	0.0638107	0.786461
27043	PELP1	0.155226	0.0605357	0.786461
271	AMPD2	-0.151346	0.0673191	0.786461
27239	GPR162	0.149861	0.0700738	0.786461
283310	OTOGL	0.150949	0.0680463	0.786461
2837	UTS2R	-0.152789	0.0647269	0.786461
286410	ATP11C	0.15002	0.0697751	0.786461
2868	GRK4	0.151935	0.0662504	0.786461
2987	GUK1	-0.151951	0.0662232	0.786461
29985	SLC39A3	0.150507	0.0688641	0.786461
3006	HIST1H1C	0.154123	0.0624046	0.786461
3231	HOXD1	0.151996	0.0661416	0.786461
339327	ZNF546	0.150507	0.0688641	0.786461
339983	NAT8L	0.151784	0.0665231	0.786461
340393	C8ORFK29	0.15458	0.0616245	0.786461
340602	CXorf67	0.151573	0.0669064	0.786461
341276	OR10A2	0.150791	0.068339	0.786461
3682	ITGAE	0.154111	0.0624241	0.786461
3683	ITGAL	0.151471	0.0670919	0.786461
373509	USP50	0.152294	0.0656065	0.786461
3778	KCNMA1	0.151501	0.0670369	0.786461
379025	FLJ31306	0.150364	0.0691315	0.786461
3792	KEL	0.153311	0.0638107	0.786461
3795	KHK	0.150213	0.0694138	0.786461
3818	KLKB1	0.149842	0.0701095	0.786461
387097	C6orf147	0.152124	0.0659109	0.786461
387775	SLC22A10	0.152559	0.0651352	0.786461
388284	C16orf86	0.153537	0.0634157	0.786461
388662	SLC6A17	0.150896	0.0681437	0.786461
390790	ARL5C	0.153639	0.0632386	0.786461
4023	LPL	-0.152585	0.0650883	0.786461
407040	MIR34A	-0.151735	0.0666119	0.786461
4125	MAN2B1	0.150349	0.0691597	0.786461
429	ASCL1	-0.149703	0.0703736	0.786461
439921	MXRA7	0.154395	0.0619394	0.786461
439965	FAM35B2	0.150912	0.0681159	0.786461
440	ASNS	0.154527	0.0617144	0.786461
440854	CAPN14	0.155332	0.060359	0.786461
4615	MYD88	0.149767	0.0702521	0.786461
4668	NAGA	0.150866	0.0681995	0.786461
4753	NELL2	0.154463	0.0618236	0.786461
4810	NHS	-0.152404	0.0654109	0.786461
4833	NME4	0.154331	0.062049	0.786461
4857	NOVA1	0.152989	0.0643738	0.786461
4920	ROR2	0.150825	0.0682762	0.786461
4973	OLR1	0.150836	0.0682552	0.786461
5054	SERPINE1	-0.14962	0.070531	0.786461
50834	TAS2R1	-0.14979	0.0702093	0.786461
51060	TXNDC12	0.152396	0.0654244	0.786461
51393	TRPV2	0.149567	0.0706313	0.786461
51397	COMMD10	0.150028	0.0697609	0.786461
51399	TRAPPC4	0.149506	0.0707461	0.786461
5178	PEG3	0.152094	0.0659651	0.786461
5330	PLCB2	0.15447	0.0618107	0.786461
54039	PCBP3	-0.151463	0.0671056	0.786461
54088	LINC00113	-0.149944	0.0699172	0.786461
54102	CLIC6	-0.150896	0.0681437	0.786461
54438	GFOD1	0.15421	0.0622557	0.786461
54662	TBC1D13	0.152657	0.0649062	0.786461
54765	TRIM44	0.15486	0.0611514	0.786461
54806	AHI1	0.153148	0.064095	0.786461
54873	PALMD	0.151282	0.0674364	0.786461
54982	CLN6	-0.151577	0.0668996	0.786461
55037	PTCD3	0.150825	0.0682762	0.786461
55217	TMLHE	0.153405	0.0636459	0.786461
55634	ZNF673	0.150534	0.068815	0.786461
55692	LUC7L	-0.149888	0.070024	0.786461
56180	MOSPD1	0.155026	0.0608715	0.786461
56934	CA10	0.152449	0.0653301	0.786461
57165	GJC2	0.15458	0.0616245	0.786461
57172	CAMK1G	0.150972	0.0680046	0.786461
57180	ACTR3B	0.15059	0.0687098	0.786461
57205	ATP10D	-0.151493	0.0670506	0.786461
5723	PSPH	0.153809	0.0629444	0.786461
57407	NMRAL1	0.151104	0.0677616	0.786461
57658	CALCOCO1	-0.152699	0.0648873	0.786461
57670	KIAA1549	0.149586	0.0705955	0.786461
57698	KIAA1598	0.153923	0.0627489	0.786461
5813	PURA	0.149725	0.0703307	0.786461
58533	SNX6	0.149937	0.0699315	0.786461
58538	MPP4	0.153473	0.0635274	0.786461
5890	RAD51B	0.149975	0.0698604	0.786461
5899	RALB	0.152479	0.0652763	0.786461
6041	RNASEL	0.153719	0.0631012	0.786461
6043	SNORA63	0.152778	0.0647469	0.786461
6079	SNORD15A	0.150126	0.0695766	0.786461
6169	RPL38	-0.152442	0.0653436	0.786461
6256	RXRA	0.152434	0.065357	0.786461
6275	S100A4	0.153243	0.0639296	0.786461
6397	SEC14L1	0.150798	0.068325	0.786461
64130	LIN7B	0.15152	0.0670025	0.786461
643854	CTAGE9	-0.150726	0.0684577	0.786461
64682	ANAPC1	0.151845	0.0664139	0.786461
64763	ZNF574	-0.154946	0.0610049	0.786461
64768	IPPK	0.151017	0.0679212	0.786461
64901	RANBP17	0.149691	0.070395	0.786461
6497	SKI	-0.153628	0.0632583	0.786461
65009	NDRG4	0.15336	0.063725	0.786461
65981	CAPRIN2	0.151414	0.0671951	0.786461
6666	SOX12	0.150609	0.0686747	0.786461
668	FOXL2	-0.149601	0.0705668	0.786461
6866	TAC3	0.150458	0.0689555	0.786461
6891	TAP2	0.155177	0.0606179	0.786461
7035	TFPI	0.152816	0.0646801	0.786461
7060	THBS4	0.150413	0.0690399	0.786461
7262	PHLDA2	0.154742	0.0613492	0.786461
7276	TTR	0.154897	0.0610877	0.786461
729515	TMEM242	0.150281	0.0692866	0.786461
7325	UBE2E2	0.154021	0.0625798	0.786461
7572	ZNF24	-0.152143	0.065877	0.786461
7754	ZNF204P	0.149514	0.0707318	0.786461
79258	MMEL1	0.151376	0.067264	0.786461
79673	ZNF329	0.151716	0.0666461	0.786461
79877	DCAKD	-0.149752	0.0702807	0.786461
7991	TUSC3	0.15005	0.0697183	0.786461
80034	CSRNP3	0.153379	0.063692	0.786461
80054	LOC80054	0.153643	0.0632321	0.786461
80304	C2orf44	-0.149563	0.0706385	0.786461
80700	UBXN6	0.152192	0.065789	0.786461
80864	EGFL8	0.151066	0.0678309	0.786461
8087	FXR1	-0.151218	0.0675539	0.786461
8120	AP3B2	0.154939	0.0610177	0.786461
81602	CDADC1	-0.149654	0.0704666	0.786461
81631	MAP1LC3B	0.154531	0.0617079	0.786461
83540	NUF2	0.152574	0.0651084	0.786461
83891	SNX25	0.154716	0.061394	0.786461
84329	HVCN1	0.151248	0.0674986	0.786461
84417	C2orf40	-0.152064	0.0660194	0.786461
8462	KLF11	-0.154508	0.0617465	0.786461
84793	MGC12982	0.152068	0.0660126	0.786461
84824	FCRLA	0.151475	0.067085	0.786461
85455	DISP2	0.152476	0.065283	0.786461
89782	LMLN	0.15217	0.0658296	0.786461
89953	KLC4	-0.153499	0.0634814	0.786461
9124	PDLIM1	0.154519	0.0617272	0.786461
9141	PDCD5	0.15013	0.0695695	0.786461
91754	NEK9	0.150621	0.0686537	0.786461
92140	MTDH	0.152857	0.0646068	0.786461
9320	TRIP12	-0.152083	0.0659854	0.786461
9332	CD163	0.149672	0.0704308	0.786461
9446	GSTO1	0.151618	0.0668241	0.786461
9468	PCYT1B	0.152056	0.0660329	0.786461
960	CD44	0.150205	0.0694279	0.786461
9695	EDEM1	-0.150908	0.0681229	0.786461
9749	PHACTR2	0.153231	0.0639495	0.786461
9859	CEP170	0.1537	0.0631339	0.786461
6880	TAF9	0.14948	0.0707964	0.786496
2554	GABRA1	0.149397	0.0709546	0.787444
3241	HPCAL1	0.149385	0.0709762	0.787444
121214	SDR9C7	0.149329	0.0710843	0.787675
93622	LOC93622	0.149325	0.0710915	0.787675
1018	CDK3	-0.149246	0.071243	0.787783
407975	MIR17HG	0.149268	0.0711997	0.787783
91647	ATPAF2	0.149295	0.0711492	0.787783
175	AGA	0.149193	0.0713441	0.788293
53373	TPCN1	0.149155	0.0714165	0.788293
9781	RNF144A	0.149147	0.0714309	0.788293
10538	BATF	0.149	0.0717136	0.788602
1119	CHKA	-0.148985	0.0717427	0.788602
154092	LOC154092	0.148996	0.0717209	0.788602
23498	HAAO	0.148989	0.0717354	0.788602
256281	NUDT14	0.149087	0.0715468	0.788602
79686	LINC00341	0.149026	0.0716628	0.788602
10046	MAMLD1	0.148894	0.0719171	0.788959
25897	RNF19A	0.148917	0.0718735	0.788959
3055	HCK	0.148909	0.071888	0.788959
3784	KCNQ1	-0.148811	0.0720774	0.789239
388011	C14orf64	0.148807	0.0720846	0.789239
7351	UCP2	0.148807	0.0720846	0.789239
219417	OR8U1	0.14866	0.0723324	0.789878
284293	HMSD	0.148713	0.0722671	0.789878
8629	JRK	0.14869	0.0723109	0.789878
9228	DLGAP2	0.148694	0.0723036	0.789878
3269	HRH1	-0.148626	0.0724353	0.789966
64779	MTHFSD	0.148641	0.072406	0.789966
2831	NPBWR1	0.148543	0.0725964	0.791206
7332	UBE2L3	0.148509	0.0726625	0.791408
56143	PCDHA5	0.148467	0.0727432	0.791771
285205	LOC285205	0.148392	0.0728902	0.792853
127262	TPRG1L	0.148294	0.0730817	0.7939
607	BCL9	-0.148305	0.0730596	0.7939
5523	PPP2R3A	0.148203	0.0732588	0.794076
7695	ZNF136	-0.148233	0.0731997	0.794076
83849	SYT15	0.148188	0.0732883	0.794076
85407	NKD1	0.148237	0.0731923	0.794076
375790	AGRN	0.148139	0.0733844	0.794601
10447	FAM3C	0.148078	0.0735029	0.794816
390928	PAPL	0.148056	0.0735473	0.794816
54676	GTPBP2	0.14809	0.0734807	0.794816
1207	CLNS1A	0.147972	0.0737105	0.795194
164668	APOBEC3H	0.147965	0.0737253	0.795194
90135	BTBD6	0.147965	0.0737253	0.795194
3841	KPNA5	-0.147923	0.0738071	0.795561
84722	PSRC1	0.147886	0.0738814	0.795848
130589	GALM	0.147836	0.0739781	0.796375
230	ALDOC	-0.147768	0.0741123	0.797304
100131347	LOC100131347	-0.147629	0.0743886	0.798412
1043	CD52	-0.147508	0.0746282	0.798412
147694	ZNF548	-0.14744	0.0747633	0.798412
148189	LOC148189	0.147349	0.0749437	0.798412
149934	NCOR1P1	0.14741	0.0748234	0.798412
151126	ZNF385B	0.147583	0.0744783	0.798412
151790	WDR49	-0.14733	0.0749813	0.798412
25923	ATL3	0.147576	0.0744933	0.798412
342372	PKD1L3	0.147334	0.0749738	0.798412
3770	KCNJ14	0.147425	0.0747933	0.798412
55892	MYNN	-0.147451	0.0747407	0.798412
56134	PCDHAC2	0.147398	0.0748459	0.798412
8611	PPAP2A	0.14733	0.0749813	0.798412
866	SERPINA6	0.147625	0.074396	0.798412
8879	SGPL1	0.147387	0.0748685	0.798412
9341	VAMP3	0.147375	0.074891	0.798412
7874	USP7	0.147281	0.0750792	0.798435
79068	FTO	0.1473	0.0750415	0.798435
5296	PIK3R2	0.147247	0.075147	0.798647
2217	FCGRT	0.147164	0.0752832	0.79875
342865	VSTM2B	-0.14719	0.0752602	0.79875
343521	TCTEX1D4	-0.147122	0.0753962	0.79875
7272	TTK	0.147145	0.0753509	0.79875
85012	TCEAL3	0.147168	0.0753055	0.79875
10195	ALG3	0.146465	0.0767211	0.80108
121551	BTBD11	0.146518	0.0766138	0.80108
124401	ANKS3	-0.146631	0.0763843	0.80108
170627	XAGE5	0.146669	0.0763079	0.80108
23630	KCNE1L	0.146983	0.0756764	0.80108
280664	WFDC10B	-0.146635	0.0763767	0.80108
283335	LOC283335	0.146937	0.0757674	0.80108
283888	LOC283888	-0.146741	0.076163	0.80108
285126	DNAJC5G	0.146843	0.0759574	0.80108
2992	GYG1	0.14651	0.0766291	0.80108
343071	PRAMEF10	-0.146726	0.0761935	0.80108
348808	NPHP3-AS1	0.146605	0.0764378	0.80108
4734	NEDD4	-0.146522	0.0766062	0.80108
4778	NFE2	0.146639	0.076369	0.80108
4975	OMP	-0.146575	0.076499	0.80108
51270	TFDP3	0.146646	0.0763538	0.80108
5224	PGAM2	0.146525	0.0765985	0.80108
5346	PLIN1	0.146612	0.0764225	0.80108
55111	PLEKHJ1	-0.146612	0.0764225	0.80108
55320	MIS18BP1	0.146624	0.0763996	0.80108
57804	POLD4	0.146473	0.0767058	0.80108
90809	TMEM55B	0.146835	0.0759726	0.80108
9793	CKAP5	-0.146745	0.0761554	0.80108
10418	SPON1	0.146231	0.0771977	0.801539
219981	OR5A2	0.146386	0.0768823	0.801539
23528	ZNF281	0.146242	0.0771492	0.801539
25859	PART1	0.146374	0.0769053	0.801539
26064	RAI14	0.146291	0.0770745	0.801539
5550	PREP	0.146246	0.0771669	0.801539
57479	PRR12	0.146261	0.0771361	0.801539
782	CACNB1	0.146261	0.0771106	0.801539
80380	PDCD1LG2	0.146253	0.0771515	0.801539
55505	NOP10	-0.146193	0.0772748	0.801841
7555	CNBP	0.146144	0.0773752	0.802382
10912	GADD45G	0.146065	0.0775374	0.802458
51552	RAB14	0.146034	0.077575	0.802458
54796	BNC2	-0.146068	0.0775297	0.802458
90864	SPSB3	-0.146049	0.0775684	0.802458
28954	REM1	0.145993	0.0776845	0.802756
55502	HES6	0.145985	0.0777	0.802756
2044	EPHA5	0.145959	0.0777542	0.802819
121268	RHEBL1	0.145827	0.0780259	0.804627
6144	RPL21	0.145838	0.0780026	0.804627
140876	FAM65C	0.145789	0.0781037	0.804931
1152	CKB	0.145521	0.0786576	0.805661
1404	HAPLN1	0.145566	0.0785638	0.805661
387763	C11orf96	-0.145555	0.0785872	0.805661
3972	LHB	-0.145645	0.0783998	0.805661
51119	SBDS	0.145709	0.0782672	0.805661
55110	MAGOHB	0.145566	0.0785638	0.805661
8073	PTP4A2	0.145623	0.0784466	0.805661
816	CAMK2B	0.14566	0.0783686	0.805661
8290	HIST3H3	0.145528	0.078642	0.805661
9961	MVP	0.145702	0.0782828	0.805661
1908	EDN3	0.145437	0.0788299	0.806435
23478	SEC11A	0.145449	0.0788064	0.806435
375449	MAST4	0.145411	0.0788848	0.806502
3240	HP	0.145358	0.0789947	0.80713
7620	ZNF69	0.145324	0.0790653	0.807357
1212	CLTB	0.145215	0.0792935	0.809191
152579	SCFD2	-0.145135	0.079459	0.809889
25851	TECPR1	0.145135	0.079459	0.809889
246184	CDC26	0.145052	0.0796327	0.809957
2983	GUCY1B3	0.145063	0.079609	0.809957
390877	LOC390877	-0.145082	0.0795695	0.809957
57830	KRTAP5-8	0.144965	0.0798146	0.809957
642987	TMEM232	0.144946	0.0798542	0.809957
6667	SP1	0.144965	0.0798146	0.809957
81606	LBH	0.145033	0.0796722	0.809957
90342	FER1L5	0.144988	0.0797671	0.809957
29089	UBE2T	0.144916	0.0799176	0.810107
91807	MYLK3	0.144878	0.0799969	0.810418
147111	NOTUM	0.144776	0.0802112	0.811845
55753	OGDHL	0.144765	0.0802351	0.811845
1001	CDH3	0.14297	0.0840838	0.812579
1047	CLGN	0.143057	0.0838941	0.812579
10783	NEK6	0.143802	0.0822832	0.812579
10841	FTCD	-0.143084	0.0838364	0.812579
114569	MAL2	0.143118	0.0837623	0.812579
116154	PHACTR3	0.143688	0.0825269	0.812579
130120	REG3G	0.143326	0.0833106	0.812579
130827	TMEM182	0.143193	0.0835979	0.812579
132299	OCIAD2	0.143503	0.0829262	0.812579
146822	CDRT15	0.143307	0.0833516	0.812579
147138	TMC8	-0.144134	0.0815717	0.812579
153910	LOC153910	-0.143579	0.082763	0.812579
162515	SLC16A11	-0.144187	0.081459	0.812579
1666	DECR1	0.143911	0.0820482	0.812579
173	AFM	0.143613	0.0826897	0.812579
1974	EIF4A2	0.143926	0.0820158	0.812579
202374	STK32A	-0.14424	0.0813464	0.812579
2125	EVPL	0.143851	0.0821778	0.812579
22869	ZNF510	0.144561	0.0806653	0.812579
238	ALK	-0.143919	0.082032	0.812579
259287	TAS2R41	0.144047	0.081743	0.812579
25966	C2CD2	0.143749	0.0823969	0.812579
26831	RNU5A-1	-0.143813	0.0822589	0.812579
27012	KCNV1	0.144032	0.0817895	0.812579
27165	GLS2	0.143299	0.083368	0.812579
283867	LOC283867	-0.143624	0.0826653	0.812579
284440	LOC284440	0.143673	0.0825594	0.812579
3158	HMGCS2	0.143616	0.0826815	0.812579
342666	FLJ43826	-0.144225	0.0813785	0.812579
3442	IFNA5	0.143208	0.083565	0.812579
3660	IRF2	0.143397	0.0831551	0.812579
375061	FAM89A	0.143681	0.0825432	0.812579
389015	SLC9A4	0.1441	0.0816442	0.812579
399668	LINC00086	0.144519	0.0807532	0.812579
4208	MEF2C	0.144089	0.0816684	0.812579
4486	MST1R	-0.143122	0.0837541	0.812579
4809	NHP2L1	0.143677	0.0825513	0.812579
4821	NKX2-2	0.144319	0.0811777	0.812579
4879	NPPB	0.143439	0.0830651	0.812579
490	ATP2B1	0.144368	0.0810734	0.812579
51125	GOLGA7	0.143348	0.0832615	0.812579
51499	TRIAP1	-0.143749	0.0823969	0.812579
54979	HRASLS2	0.143008	0.0840013	0.812579
55228	PNMAL1	0.143129	0.0837377	0.812579
55337	C19orf66	0.143212	0.0835568	0.812579
55509	BATF3	0.143057	0.0838941	0.812579
55742	PARVA	0.144652	0.0804739	0.812579
56106	PCDHGA10	0.14441	0.0809852	0.812579
56603	CYP26B1	0.143454	0.0830324	0.812579
57007	CXCR7	0.143654	0.0826001	0.812579
57513	CASKIN2	0.143341	0.0832779	0.812579
6239	RREB1	-0.144304	0.0812098	0.812579
6293	VPS52	0.1441	0.0816442	0.812579
6326	SCN2A	0.144444	0.0809132	0.812579
64090	GAL3ST2	-0.143877	0.0821211	0.812579
6453	ITSN1	0.142959	0.0841001	0.812579
64744	SMAP2	0.143103	0.0837953	0.812579
64852	TUT1	-0.144161	0.0815153	0.812579
692229	SNORD105	-0.143979	0.0819026	0.812579
7046	TGFBR1	0.144172	0.0814912	0.812579
7161	TP73	-0.144531	0.0807292	0.812579
727936	GXYLT2	0.144123	0.0815959	0.812579
7716	VEZF1	0.143839	0.0822021	0.812579
79691	QTRTD1	-0.143443	0.0830569	0.812579
79746	ECHDC3	0.143458	0.0830242	0.812579
80217	WDR96	-0.143246	0.0834829	0.812579
80307	FER1L4	0.1443	0.0812178	0.812579
83657	DYNLRB2	0.144368	0.0810734	0.812579
83879	CDCA7	0.143046	0.0839188	0.812579
8530	CST7	0.143957	0.0819511	0.812579
881	CCIN	0.144406	0.0809933	0.812579
891	CCNB1	0.143443	0.0830569	0.812579
9013	TAF1C	0.14464	0.0804978	0.812579
90313	TP53I13	0.143465	0.0830079	0.812579
90362	FAM110B	0.144508	0.0807772	0.812579
91752	ZNF804A	0.142959	0.0841086	0.812579
91977	MYOZ3	0.144489	0.0808172	0.812579
94081	SFXN1	0.144025	0.0818056	0.812579
92162	TMEM88	0.142929	0.0841747	0.812746
5800	PTPRO	0.14288	0.0842822	0.813313
347745	PAR4	-0.142834	0.0843815	0.8138
5273	SERPINB10	-0.142778	0.0845057	0.814457
9738	CCP110	0.142759	0.0845472	0.814457
6139	RPL17	0.142732	0.0846052	0.814545
127254	C1orf173	0.142668	0.0847464	0.815433
10083	USH1C	0.142256	0.0856559	0.816137
10422	UBAC1	0.141928	0.0863874	0.816137
130540	ALS2CR12	-0.14237	0.0854048	0.816137
132720	C4orf32	0.142336	0.08548	0.816137
153443	SRFBP1	0.142147	0.0858992	0.816137
155	ADRB3	0.141848	0.0865647	0.816137
158586	ZXDB	-0.142113	0.0859748	0.816137
166348	KBTBD12	0.14226	0.0856475	0.816137
221545	C6orf136	0.142411	0.0853129	0.816137
26505	CNNM3	0.142181	0.0858236	0.816137
283	ANG	0.142381	0.0853797	0.816137
284578	LOC284578	0.142045	0.0861262	0.816137
2886	GRB7	-0.142192	0.0857984	0.816137
348645	C22orf34	-0.141947	0.0863452	0.816137
388135	C15orf59	0.141697	0.0869033	0.816137
389119	FAM212A	0.142192	0.0857984	0.816137
4112	MAGEB1	0.141709	0.0868778	0.816137
51133	KCTD3	0.142238	0.0856978	0.816137
5122	PCSK1	0.141739	0.0868101	0.816137
54089	LINC00112	-0.142445	0.0852377	0.816137
54552	GNL3L	0.141977	0.0862778	0.816137
54880	BCOR	0.141765	0.0867508	0.816137
55030	FBXO34	0.141648	0.0870135	0.816137
55063	ZCWPW1	0.142547	0.0850126	0.816137
55295	KLHL26	0.142528	0.0850542	0.816137
55604	LRRC16A	-0.141879	0.0864971	0.816137
5563	PRKAA2	0.142377	0.0853827	0.816137
55761	TTC17	0.141667	0.0869711	0.816137
55967	NDUFA12	-0.142366	0.0854131	0.816137
57495	KIAA1239	0.142132	0.0859328	0.816137
5959	RDH5	0.141678	0.0869457	0.816137
6000	RGS7	0.142075	0.0860588	0.816137
637	BID	-0.14243	0.0852711	0.816137
63876	PKNOX2	0.141905	0.086438	0.816137
6710	SPTB	0.141644	0.087022	0.816137
7031	TFF1	-0.141943	0.0863536	0.816137
7037	TFRC	0.141762	0.0867592	0.816137
729440	CCDC61	-0.141667	0.0869696	0.816137
7633	ZNF79	-0.141985	0.0862577	0.816137
7844	RNF103	0.141803	0.0866662	0.816137
84981	MIR22HG	0.142358	0.0854299	0.816137
8576	STK16	0.14172	0.0868524	0.816137
86	ACTL6A	0.142389	0.085363	0.816137
8992	ATP6V0E1	0.141792	0.0866915	0.816137
9370	ADIPOQ	0.142177	0.085832	0.816137
341567	H1FNT	0.141614	0.0870899	0.816315
165257	C1QL2	0.141573	0.0871834	0.816732
22899	ARHGEF15	0.141531	0.0872769	0.817009
7528	YY1	0.141516	0.0873109	0.817009
10638	SPHAR	0.141414	0.0875409	0.817645
140735	DYNLL2	0.14144	0.0874812	0.817645
55186	SLC25A36	0.141399	0.087575	0.817645
7779	SLC30A1	0.14141	0.0875494	0.817645
197350	CASP14L	-0.141365	0.0876518	0.817904
147837	ZNF563	-0.14132	0.0877543	0.817945
57823	SLAMF7	-0.141323	0.0877458	0.817945
2153	F5	0.141267	0.087874	0.818603
9923	ZBTB40	0.141202	0.0880195	0.8195
285045	LINC00486	-0.141112	0.0882252	0.819585
3235	HOXD9	0.141127	0.0881909	0.819585
441061	2018-03-11	0.141119	0.0882081	0.819585
7307	U2AF1	0.141146	0.088148	0.819585
23092	ARHGAP26	0.141089	0.0882784	0.819622
100128788	LOC100128788	0.138898	0.093369	0.820767
100533107	RTEL1-TNFRSF6B	0.13957	0.0917819	0.820767
10066	SCAMP2	0.137595	0.0965072	0.820767
10250	SRRM1	-0.137961	0.0956165	0.820767
10642	IGF2BP1	-0.138033	0.0954428	0.820767
10717	AP4B1	0.136635	0.0988708	0.820767
10957	PNRC1	0.13665	0.0988332	0.820767
11098	PRSS23	-0.138675	0.0938998	0.820767
11158	RABL2B	0.138384	0.0945962	0.820767
112840	WDR89	0.138343	0.0946961	0.820767
112936	VPS26B	0.139181	0.0926976	0.820767
1131	CHRM3	-0.139876	0.0910668	0.820767
1144	CHRND	0.140122	0.0904963	0.820767
116535	MRGPRF	-0.139937	0.0909261	0.820767
120534	C11orf46	0.136869	0.0982896	0.820767
123103	KLHL33	-0.137413	0.0969504	0.820767
124045	C16orf55	0.140031	0.0907066	0.820767
126231	ZNF573	-0.139026	0.0930642	0.820767
128674	PROKR2	0.136616	0.0989177	0.820767
129607	CMPK2	0.136952	0.0980841	0.820767
131474	CHCHD4	0.139257	0.0925313	0.820767
135228	CD109	0.139079	0.0929389	0.820767
1386	ATF2	0.138078	0.0953333	0.820767
140700	SAMD10	-0.14033	0.0900157	0.820767
1511	CTSG	0.137001	0.0979628	0.820767
151963	MB21D2	0.136695	0.0987205	0.820767
1523	CUX1	-0.140519	0.0895854	0.820767
1549	CYP2A7	-0.139438	0.0920923	0.820767
155368	WBSCR27	0.140647	0.0892856	0.820767
1603	DAD1	0.137391	0.0970059	0.820767
160428	ALDH1L2	0.139782	0.0912871	0.820767
160760	PPTC7	-0.137368	0.0970614	0.820767
162962	ZNF836	0.140488	0.0896501	0.820767
167359	NIM1	0.138048	0.0954063	0.820767
168507	PKD1L1	0.137462	0.0968302	0.820767
1960	EGR3	0.140114	0.0905138	0.820767
196968	DNM1P46	0.137081	0.0977671	0.820767
199699	DAND5	0.13869	0.0938638	0.820767
199713	NLRP7	-0.138939	0.0932703	0.820767
2176	FANCC	0.136541	0.0991058	0.820767
219293	ATAD3C	0.138739	0.0937616	0.820767
221037	JMJD1C	-0.136695	0.0987205	0.820767
222068	TMED4	0.136877	0.0982709	0.820767
22823	MTF2	-0.13988	0.091058	0.820767
22837	COBLL1	-0.140103	0.09054	0.820767
22889	KIAA0907	-0.139884	0.0910492	0.820767
23054	NCOA6	-0.138388	0.0945872	0.820767
23077	MYCBP2	0.137572	0.0965625	0.820767
23126	POGZ	0.139763	0.0913312	0.820767
23245	ASTN2	-0.139317	0.0923767	0.820767
23332	CLASP1	0.139159	0.0927512	0.820767
23350	U2SURP	0.139298	0.0924213	0.820767
23416	KCNH3	0.140379	0.089908	0.820767
23500	DAAM2	0.137606	0.0964796	0.820767
23683	PRKD3	0.139922	0.0909613	0.820767
23788	MTCH2	-0.140186	0.0903475	0.820767
246175	CNOT6L	-0.13869	0.0938638	0.820767
257396	LOC257396	0.139582	0.0917553	0.820767
25802	LMOD1	0.13863	0.0940081	0.820767
25879	DCAF13	0.138588	0.0941074	0.820767
26585	GREM1	0.137768	0.096084	0.820767
266629	SEC14L3	0.138803	0.0935936	0.820767
26985	AP3M1	0.136809	0.0984393	0.820767
27085	MTBP	-0.138414	0.0945237	0.820767
27258	LSM3	0.136862	0.0983083	0.820767
2760	GM2A	0.138622	0.0940261	0.820767
285492	FLJ35424	-0.138135	0.0951964	0.820767
285521	COX18	0.138856	0.0934678	0.820767
285878	LOC285878	-0.136575	0.0990212	0.820767
29070	CCDC113	0.140847	0.0888275	0.820767
29896	TRA2A	0.136979	0.0980188	0.820767
29966	STRN3	-0.137111	0.0976926	0.820767
309	ANXA6	0.137054	0.0978323	0.820767
3136	HLA-H	0.139835	0.0911637	0.820767
3219	HOXB9	0.137194	0.0974881	0.820767
3301	DNAJA1	0.13804	0.0954246	0.820767
3320	HSP90AA1	0.138259	0.094896	0.820767
3321	IGSF3	-0.14008	0.0905926	0.820767
342897	NCCRP1	0.136949	0.0980934	0.820767
347051	SLC10A5	-0.138592	0.0940984	0.820767
3481	IGF2	0.136748	0.0985892	0.820767
3766	KCNJ10	0.137466	0.096821	0.820767
379	ARL4D	-0.139412	0.0921544	0.820767
388610	TRNP1	0.139298	0.0924213	0.820767
388963	C2orf81	0.136937	0.0981214	0.820767
390084	OR56A5	0.140243	0.0902164	0.820767
390874	ONECUT3	0.138176	0.0950962	0.820767
390980	ZNF805	-0.1377	0.0962494	0.820767
3985	LIMK2	0.139582	0.0917553	0.820767
400793	C1orf226	0.137731	0.0961759	0.820767
401551	WDR38	-0.136813	0.09843	0.820767
402481	PP13004	-0.138384	0.0945962	0.820767
4025	LPO	0.137304	0.0972189	0.820767
4141	MARS	0.136858	0.0983177	0.820767
4174	MCM5	0.13753	0.096664	0.820767
4185	ADAM11	-0.139642	0.0916138	0.820767
4245	MGAT1	0.137247	0.0973581	0.820767
462	SERPINC1	0.140424	0.0897979	0.820767
4638	MYLK	0.139907	0.0909965	0.820767
4689	NCF4	0.138894	0.093378	0.820767
4761	NEUROD2	0.139211	0.0926262	0.820767
4869	NPM1	0.137232	0.0973952	0.820767
501	ALDH7A1	0.137855	0.095873	0.820767
5126	PCSK2	0.137304	0.0972189	0.820767
51276	ZNF571	0.139	0.0931269	0.820767
51306	FAM13B	0.139404	0.0921722	0.820767
51312	SLC25A37	0.139272	0.0924836	0.820767
51603	METTL13	0.137485	0.0967748	0.820767
5218	CDK14	0.137946	0.0956531	0.820767
525	ATP6V1B1	0.140247	0.0902077	0.820767
5331	PLCB3	0.14002	0.0907329	0.820767
53335	BCL11A	0.140001	0.0907768	0.820767
54112	GPR88	0.139714	0.0914459	0.820767
54914	KIAA1797	0.138456	0.094424	0.820767
54926	UBE2R2	0.13676	0.0985611	0.820767
54988	ACSM5	0.137644	0.0963875	0.820767
55118	CRTAC1	0.136907	0.0981962	0.820767
55163	PNPO	-0.140145	0.0904437	0.820767
55207	ARL8B	-0.140451	0.089737	0.820767
55229	PANK4	0.137757	0.0961323	0.820767
55260	TMEM143	0.137572	0.0965625	0.820767
55283	MCOLN3	-0.139827	0.0911813	0.820767
55422	ZNF331	-0.140719	0.0891212	0.820767
55553	SOX6	-0.138921	0.0933151	0.820767
55652	SLC48A1	0.138996	0.0931358	0.820767
55691	FRMD4A	0.139846	0.0911373	0.820767
5590	PRKCZ	0.140473	0.0896848	0.820767
55907	CMAS	0.137338	0.0971355	0.820767
55922	NKRF	0.136979	0.0980188	0.820767
5616	PRKY	-0.138207	0.0950233	0.820767
5624	PROC	-0.138441	0.0944603	0.820767
5641	LGMN	0.136979	0.0980188	0.820767
5669	PSG1	0.136733	0.0986267	0.820767
57095	PITHD1	0.136643	0.098852	0.820767
5716	PSMD10	0.139805	0.0912342	0.820767
57185	NIPAL3	0.138853	0.0934768	0.820767
59286	UBL5	-0.140617	0.089355	0.820767
606551	UBE2MP1	0.137013	0.0979348	0.820767
60680	CELF5	0.137776	0.0960656	0.820767
6208	RPS14	0.137719	0.0962035	0.820767
6272	SORT1	0.138433	0.0944784	0.820767
63974	NEUROD6	0.140643	0.0892943	0.820767
6401	SELE	-0.13957	0.0917819	0.820767
64132	XYLT2	0.136639	0.0988614	0.820767
64216	TFB2M	0.139472	0.0920124	0.820767
645323	LINC00461	0.139468	0.0920212	0.820767
64745	METTL17	0.139147	0.092778	0.820767
64979	MRPL36	0.137096	0.0977299	0.820767
64981	MRPL34	0.139336	0.0923322	0.820767
65072	CFLAR-AS1	0.137704	0.0962402	0.820767
65082	VPS33A	0.136593	0.0989741	0.820767
65124	ANKRD57	0.138758	0.0937016	0.820767
6520	SLC3A2	0.140609	0.0893723	0.820767
65979	PHACTR4	0.137145	0.0976089	0.820767
65980	BRD9	-0.140828	0.0888706	0.820767
6634	SNRPD3	-0.136525	0.0991435	0.820767
6637	SNRPG	0.137243	0.0973673	0.820767
677849	SNORD1B	0.137292	0.0972468	0.820767
7022	TFAP2C	0.138622	0.0940261	0.820767
7042	TGFB2	0.139242	0.0925549	0.820767
7054	TH	-0.139238	0.0925638	0.820767
7188	TRAF5	0.137364	0.0970707	0.820767
728975	LOC728975	-0.138203	0.0950324	0.820767
750	C16orf3	0.138127	0.0952147	0.820767
7544	ZFY	0.139162	0.0927423	0.820767
7737	RNF113A	-0.137232	0.0973952	0.820767
7780	SLC30A2	0.139563	0.0917996	0.820767
7869	SEMA3B	0.136892	0.0982335	0.820767
79065	ATG9A	0.136537	0.0991153	0.820767
79091	METTL22	0.140118	0.090505	0.820767
79187	FSD1	0.140964	0.0885604	0.820767
79582	SPAG16	0.140511	0.0896028	0.820767
79671	NLRX1	-0.139102	0.0928852	0.820767
79867	TCTN2	0.13651	0.0991812	0.820767
7994	KAT6A	0.14022	0.0902688	0.820767
80021	TMEM62	0.140964	0.0885604	0.820767
80115	BAIAP2L2	0.136828	0.0983925	0.820767
80164	FLJ22184	0.138248	0.0949232	0.820767
80823	BHLHB9	0.137255	0.0973395	0.820767
81603	TRIM8	0.139287	0.092448	0.820767
8200	GDF5	0.13744	0.0968857	0.820767
83734	ATG10	0.136971	0.0980374	0.820767
83737	ITCH	0.138335	0.0947142	0.820767
83933	HDAC10	0.138086	0.095315	0.820767
83942	TSSK1B	0.136782	0.0985049	0.820767
84000	TMPRSS13	0.138105	0.0952694	0.820767
84078	KBTBD7	0.137285	0.0972653	0.820767
84236	RHBDD1	0.139091	0.092912	0.820767
84449	ZNF333	-0.140556	0.0894937	0.820767
84684	INSM2	0.140247	0.0902077	0.820767
84883	AIFM2	0.13679	0.0984862	0.820767
84912	SLC35B4	-0.136578	0.0990118	0.820767
8536	CAMK1	0.140352	0.0899634	0.820767
8646	CHRD	0.140757	0.0890347	0.820767
8649	LAMTOR3	0.138074	0.0953424	0.820767
8740	TNFSF14	0.138649	0.093963	0.820767
8837	CFLAR	0.137421	0.0969319	0.820767
8894	EIF2S2	-0.138033	0.0954428	0.820767
89876	C3orf15	0.138554	0.0941888	0.820767
90527	DUOXA1	-0.136847	0.0983458	0.820767
90594	ZNF439	0.137953	0.0956348	0.820767
9064	MAP3K6	-0.139812	0.0912165	0.820767
90957	DHX57	-0.138951	0.0932434	0.820767
[truncated: 14,676 more rows]

## Sheet: sva
Entrez_Gene_ID	Gene_Symbol	Δvar(ρ)	p.value	p.adjust_fdr
100529215	ZNF559-ZNF177	0.355507	1.13721e-05	0.18963
10538	BATF	0.341903	2.52295e-05	0.210351
100628315	DNM3OS	0.291812	0.000354722	0.421703
10941	UGT2A1	-0.295911	0.000290491	0.421703
129450	TYW5	0.299636	0.000241663	0.421703
1409	CRYAA	0.29596	0.000289791	0.421703
23639	LRRC6	0.295714	0.000293304	0.421703
26239	LCE2B	0.318499	9.17093e-05	0.421703
55809	TRERF1	0.31032	0.000140669	0.421703
56155	TEX14	0.302556	0.000208846	0.421703
6048	RNF5	0.299235	0.000246519	0.421703
6614	SIGLEC1	-0.290422	0.000379343	0.421703
799	CALCR	-0.293633	0.000324714	0.421703
83657	DYNLRB2	0.290682	0.000374609	0.421703
8745	ADAM23	0.313452	0.000119582	0.421703
10897	YIF1A	0.282431	0.000554347	0.434586
115992	RNF166	-0.284664	0.000499131	0.434586
1718	DHCR24	0.280607	0.000603607	0.434586
25870	SUMF2	0.281173	0.000587892	0.434586
280636	C11orf31	0.282023	0.000565028	0.434586
29882	ANAPC2	0.280814	0.0005978	0.434586
5664	PSEN2	0.27984	0.000625491	0.434586
5791	PTPRE	-0.281457	0.000580178	0.434586
7737	RNF113A	-0.283553	0.00052593	0.434586
221241	LINC00305	0.276851	0.000717934	0.438945
3779	KCNMB1	0.27656	0.000727575	0.438945
54798	DCHS2	-0.275756	0.000754868	0.438945
54958	TMEM160	0.27551	0.000763383	0.438945
7586	ZKSCAN1	-0.278298	0.000671706	0.438945
4352	MPL	0.27375	0.000827066	0.459711
100289388	LOC100289388	0.271313	0.000923292	0.477657
2078	ERG	-0.27013	0.000973603	0.477657
386678	KRTAP10-11	0.270123	0.000973933	0.477657
7422	VEGFA	0.270164	0.000972122	0.477657
8543	LMO4	0.26891	0.00102815	0.489841
10077	TSPAN32	0.267324	0.00110328	0.511032
259287	TAS2R41	0.266171	0.00116095	0.523213
340895	C10orf112	-0.263999	0.00127726	0.532722
403314	APOBEC4	0.263988	0.00127789	0.532722
5336	PLCG2	0.264067	0.00127346	0.532722
55531	ELMOD1	0.263073	0.00132998	0.540914
100033431	SNORD116-20	-0.262276	0.00137698	0.546694
147081	C17orf69	-0.261638	0.00141571	0.548248
171023	ASXL1	0.261139	0.00144665	0.548248
5528	PPP2R5D	0.259549	0.00154951	0.574181
10152	ABI2	0.252764	0.00206766	0.582763
10437	IFI30	0.250145	0.00230659	0.582763
10712	FAM189B	0.25517	0.00186814	0.582763
125	ADH1B	0.258495	0.00162131	0.582763
134526	ACOT12	0.251434	0.00218605	0.582763
145957	NRG4	0.252986	0.0020484	0.582763
162681	C18orf54	0.25602	0.00180197	0.582763
2296	FOXC1	0.250504	0.00227241	0.582763
26149	ZNF658	-0.255045	0.00187803	0.582763
26284	ERAL1	0.250587	0.00226457	0.582763
3075	CFH	0.257244	0.00171043	0.582763
346171	ZFP57	-0.255748	0.00182291	0.582763
3682	ITGAE	0.250402	0.00228208	0.582763
5429	POLH	-0.254766	0.00190038	0.582763
54801	HAUS6	-0.251079	0.00221869	0.582763
56953	NT5M	0.255506	0.0018417	0.582763
5872	RAB13	0.253364	0.00201612	0.582763
79572	ATP13A3	0.251596	0.00217127	0.582763
80303	EFHD1	-0.255654	0.00183023	0.582763
83888	FGFBP2	-0.251135	0.00221345	0.582763
8906	AP1G2	-0.254456	0.00192542	0.582763
3373	HYAL1	0.249454	0.00237373	0.590776
402682	UFSP1	-0.248997	0.0024191	0.593213
100506791	LOC100506791	0.233054	0.00458691	0.67587
100507205	LOC100507205	0.231936	0.00479035	0.67587
100526832	PHOSPHO2-KLHL23	0.236341	0.00403309	0.67587
1066	CES1	0.236828	0.00395631	0.67587
11019	LIAS	0.23537	0.00419007	0.67587
118471	PRAP1	0.237221	0.00389538	0.67587
126074	SWSAP1	0.238272	0.00373661	0.67587
132720	C4orf32	-0.232529	0.00468146	0.67587
15	AANAT	0.238154	0.00375402	0.67587
152024	LOC152024	0.245068	0.00284271	0.67587
158062	LCN6	0.23203	0.00477286	0.67587
167227	DCP2	-0.241313	0.00330925	0.67587
2214	FCGR3A	0.231713	0.00483186	0.67587
23052	ENDOD1	-0.232446	0.00469658	0.67587
23090	ZNF423	0.242208	0.00319213	0.67587
238	ALK	-0.23489	0.00426965	0.67587
247	ALOX15B	0.230905	0.00498514	0.67587
253982	ASPHD1	0.231335	0.00490295	0.67587
2550	GABBR1	0.237788	0.00380897	0.67587
26301	GBGT1	0.230693	0.00502596	0.67587
340578	DCAF12L2	0.230878	0.00499022	0.67587
352954	GATS	0.237694	0.00382325	0.67587
3669	ISG20	-0.235691	0.00413755	0.67587
3687	ITGAX	0.23276	0.00463975	0.67587
373509	USP50	0.232567	0.0046746	0.67587
51129	ANGPTL4	0.237879	0.00379531	0.67587
51499	TRIAP1	-0.231313	0.00490725	0.67587
51555	PEX5L	0.236605	0.00399127	0.67587
5329	PLAUR	0.241026	0.00334762	0.67587
54549	SDK2	0.231248	0.00491943	0.67587
54567	DLL4	-0.242601	0.00314193	0.67587
5458	POU4F2	0.237153	0.00390586	0.67587
54780	NSMCE4A	0.239907	0.00350093	0.67587
54809	SAMD9	-0.231947	0.00478825	0.67587
54913	RPP25	0.236061	0.00407774	0.67587
55068	ENOX1	0.23092	0.00498223	0.67587
55267	C22orf26	0.237029	0.00392515	0.67587
56729	RETN	0.244169	0.00294864	0.67587
57555	NLGN2	0.235593	0.00415355	0.67587
59353	TMEM35	-0.235891	0.00410511	0.67587
6007	RHD	0.241921	0.00322928	0.67587
64762	FAM59A	0.234403	0.00435188	0.67587
6511	SLC1A6	-0.243678	0.003008	0.67587
6550	SLC9A3	-0.2416	0.00327128	0.67587
750	C16orf3	0.242344	0.00317468	0.67587
79883	PODNL1	0.234633	0.00431282	0.67587
8289	ARID1A	0.232219	0.00473805	0.67587
8404	SPARCL1	0.242333	0.00317613	0.67587
84063	KIRREL2	0.232238	0.00473458	0.67587
84129	ACAD11	0.244191	0.00294593	0.67587
8668	EIF3I	0.233659	0.0044802	0.67587
9049	AIP	0.236477	0.00401153	0.67587
91300	R3HDM4	-0.243825	0.00299008	0.67587
9139	CBFA2T2	0.238086	0.00376417	0.67587
9798	IST1	-0.230882	0.0049895	0.67587
9810	RNF40	0.234327	0.00436475	0.67587
645212	LOC645212	0.229779	0.00520584	0.694459
22932	POMZP3	0.229001	0.00536348	0.698991
376267	RAB15	0.228812	0.00540239	0.698991
7336	UBE2V2	0.228585	0.0054494	0.698991
84226	C2orf16	0.229129	0.00533717	0.698991
84792	C7orf70	0.228713	0.00542271	0.698991
100506088	LOC100506088	0.227017	0.00578475	0.700095
100506301	LOC100506301	0.227025	0.00578309	0.700095
10361	NPM2	0.226976	0.00579389	0.700095
253039	LOC253039	0.227036	0.0057806	0.700095
2739	GLO1	-0.228173	0.00553575	0.700095
7532	YWHAG	0.227187	0.00574752	0.700095
83889	WDR87	0.227282	0.00572692	0.700095
84467	FBN3	-0.227425	0.00569575	0.700095
100131094	LOC100131094	-0.208373	0.0114381	0.705188
100131755	ARMCX4	-0.211101	0.010386	0.705188
100506275	KRBOX1-AS1	0.199503	0.015536	0.705188
100506338	LOC100506338	-0.208026	0.0115787	0.705188
100526694	C9orf30-TMEFF1	0.222412	0.00687906	0.705188
10059	DNM1L	0.222756	0.00679141	0.705188
10148	EBI3	0.212416	0.00991009	0.705188
10161	LPAR6	0.2254	0.00614983	0.705188
10201	NME6	0.203802	0.0134126	0.705188
10381	TUBB3	0.206828	0.0120748	0.705188
10675	CSPG5	0.221237	0.00718625	0.705188
10738	RFPL3	0.210772	0.0105081	0.705188
11226	GALNT6	0.201547	0.0144925	0.705188
112714	TUBA3E	0.215759	0.00878562	0.705188
114599	SNORD15B	0.203318	0.013638	0.705188
115098	CCDC124	-0.208438	0.0114123	0.705188
115201	ATG4A	0.202963	0.0138056	0.705188
120066	OR5P3	0.222665	0.00681443	0.705188
123103	KLHL33	-0.223417	0.00662566	0.705188
124045	C16orf55	0.215121	0.00899118	0.705188
1263	PLK3	-0.207043	0.0119842	0.705188
1267	CNP	0.218589	0.00792387	0.705188
127253	TYW3	-0.215328	0.00892382	0.705188
1288	COL4A6	-0.211003	0.0104223	0.705188
129025	ZNF280A	0.210036	0.0107863	0.705188
129138	ANKRD54	0.221532	0.00710808	0.705188
130576	LYPD6B	0.209155	0.0111272	0.705188
131601	TPRA1	0.219949	0.00753706	0.705188
133	ADM	-0.212669	0.00982072	0.705188
135112	NCOA7	0.205449	0.0126691	0.705188
138240	C9orf57	0.207826	0.0116603	0.705188
138639	PTPDC1	-0.202219	0.0141628	0.705188
140803	TRPM6	-0.199499	0.015538	0.705188
1421	CRYGD	-0.201679	0.0144271	0.705188
144486	LOC144486	0.206556	0.01219	0.705188
149428	BNIPL	-0.204048	0.0132994	0.705188
1555	CYP2B6	-0.211679	0.0101743	0.705188
160	AP2A1	0.205408	0.0126874	0.705188
1639	DCTN1	0.205136	0.0128078	0.705188
1781	DYNC1I2	0.202026	0.0142566	0.705188
197131	UBR1	0.207878	0.0116387	0.705188
200162	SPAG17	0.221415	0.00713906	0.705188
200205	IBA57	0.204376	0.0131491	0.705188
2249	FGF4	0.206549	0.0121933	0.705188
22835	ZFP30	0.214063	0.00934114	0.705188
22858	ICK	0.199265	0.0156617	0.705188
22941	SHANK2	0.204932	0.0128987	0.705188
22982	DIP2C	-0.201006	0.0147622	0.705188
2300	FOXL1	0.218664	0.00790193	0.705188
23002	DAAM1	0.20104	0.0147451	0.705188
23060	ZNF609	0.220712	0.00732746	0.705188
2308	FOXO1	0.203496	0.0135548	0.705188
23098	SARM1	0.208188	0.0115128	0.705188
23133	PHF8	0.215279	0.0089397	0.705188
23256	SCFD1	0.21724	0.00832477	0.705188
23506	KIAA0240	0.222812	0.00677706	0.705188
23630	KCNE1L	0.22231	0.00690526	0.705188
24145	PANX1	0.207731	0.011699	0.705188
246213	SLC17A8	-0.202672	0.0139443	0.705188
2483	FRG1	0.20381	0.0134091	0.705188
2494	NR5A2	-0.203413	0.0135937	0.705188
254225	RNF169	-0.21064	0.0105575	0.705188
254910	LCE5A	-0.214463	0.00920726	0.705188
2562	GABRB3	0.215279	0.0089397	0.705188
257397	TAB3	0.208003	0.0115879	0.705188
25829	TMEM184B	-0.205963	0.0124447	0.705188
25928	SOSTDC1	0.221331	0.00716111	0.705188
26071	FAM127B	0.218147	0.00805333	0.705188
2648	KAT2A	0.204637	0.0130311	0.705188
27238	GPKOW	0.204792	0.0129614	0.705188
27429	HTRA2	0.206416	0.0122496	0.705188
283093	OR4C12	-0.199133	0.0157319	0.705188
284942	RPL23AP82	0.207939	0.011614	0.705188
285282	RABL3	-0.22373	0.00654831	0.705188
29089	UBE2T	0.215087	0.00900224	0.705188
2952	GSTT1	0.199703	0.015431	0.705188
29763	PACSIN3	-0.203829	0.0134003	0.705188
3037	HAS2	0.208978	0.0111972	0.705188
309	ANXA6	0.213077	0.00967815	0.705188
3206	HOXA10	0.210485	0.0106157	0.705188
3360	HTR4	0.219563	0.00764492	0.705188
3376	IARS	-0.21616	0.00865882	0.705188
338328	GPIHBP1	0.199257	0.0156657	0.705188
340526	RGAG4	-0.215143	0.00898381	0.705188
341276	OR10A2	0.222986	0.00673322	0.705188
342850	ANKRD62	0.210818	0.0104911	0.705188
343641	TGM6	0.199609	0.0154805	0.705188
344838	PAQR9	0.218067	0.00807676	0.705188
352909	C19orf51	0.199582	0.0154943	0.705188
3678	ITGA5	0.201547	0.0144925	0.705188
3703	STT3A	0.22064	0.00734695	0.705188
3838	KPNA2	-0.211755	0.0101469	0.705188
386676	KRTAP10-9	-0.207999	0.0115894	0.705188
388125	C2CD4B	0.207897	0.011631	0.705188
388963	C2orf81	0.202582	0.0139878	0.705188
391322	LOC391322	0.214943	0.0090491	0.705188
4025	LPO	0.203874	0.0133794	0.705188
4053	LTBP2	0.203171	0.0137073	0.705188
4091	SMAD6	0.204985	0.0128751	0.705188
4099	MAG	0.199227	0.0156818	0.705188
4184	SMCP	0.218532	0.00794036	0.705188
4209	MEF2D	-0.217992	0.00809913	0.705188
4250	SCGB2A2	0.200916	0.0148079	0.705188
4438	MSH4	0.210028	0.0107892	0.705188
4489	MT1A	-0.210893	0.010463	0.705188
4791	NFKB2	-0.223296	0.00665569	0.705188
4888	NPY6R	0.206756	0.0121051	0.705188
493869	GPX8	0.201033	0.0147489	0.705188
51078	THAP4	0.200904	0.0148136	0.705188
51125	GOLGA7	0.210274	0.0106957	0.705188
51134	CCDC41	0.220538	0.00737473	0.705188
51148	CERCAM	0.21234	0.00993691	0.705188
51455	REV1	0.199416	0.0155818	0.705188
5151	PDE8A	0.20489	0.0129173	0.705188
51567	TDP2	0.200553	0.0149919	0.705188
51629	SLC25A39	0.199601	0.0154844	0.705188
51720	UIMC1	0.212865	0.00975184	0.705188
51741	WWOX	0.203065	0.0137573	0.705188
51809	GALNT7	0.204867	0.0129275	0.705188
5225	PGC	-0.210719	0.0105278	0.705188
5245	PHB	0.214407	0.0092261	0.705188
5368	PNOC	0.209986	0.0108051	0.705188
53944	CSNK1G1	-0.223591	0.00658269	0.705188
54487	DGCR8	0.208181	0.0115158	0.705188
54514	DDX4	0.21577	0.00878201	0.705188
54538	ROBO4	0.214592	0.00916468	0.705188
54542	RC3H2	-0.211951	0.010076	0.705188
5465	PPARA	0.199994	0.0152795	0.705188
54704	PDP1	0.203492	0.0135566	0.705188
54812	AFTPH	-0.20653	0.0122013	0.705188
54885	TBC1D8B	0.223428	0.00662285	0.705188
54946	SLC41A3	0.199582	0.0154943	0.705188
54947	LPCAT2	0.224747	0.00630314	0.705188
54979	HRASLS2	0.223923	0.00650118	0.705188
55173	MRPS10	0.214361	0.0092412	0.705188
55301	OLAH	0.213798	0.00943049	0.705188
55552	ZNF823	0.21537	0.0089104	0.705188
55561	CDC42BPG	0.220969	0.00725807	0.705188
55593	OTUD5	0.202382	0.0140842	0.705188
55728	N4BP2	0.205483	0.0126541	0.705188
55733	HHAT	0.201252	0.0146391	0.705188
55911	APOBR	0.201267	0.0146315	0.705188
56164	STK31	0.224784	0.00629418	0.705188
56257	MEPCE	0.222302	0.0069072	0.705188
5635	PRPSAP1	0.217259	0.00831903	0.705188
56475	RPRM	-0.218135	0.00805667	0.705188
56606	SLC2A9	0.22129	0.00717216	0.705188
56898	BDH2	0.214414	0.00922359	0.705188
57001	ACN9	0.218732	0.00788222	0.705188
57048	PLSCR3	0.210474	0.01062	0.705188
57134	MAN1C1	0.214233	0.00928409	0.705188
57333	RCN3	0.19962	0.0154745	0.705188
57404	CYP20A1	0.206209	0.0123387	0.705188
5764	PTN	0.20245	0.0140514	0.705188
5825	ABCD3	0.217844	0.00814292	0.705188
5865	RAB3B	-0.202385	0.0140823	0.705188
60	ACTB	-0.202688	0.013937	0.705188
60484	HAPLN2	0.215264	0.00894459	0.705188
60491	NIF3L1	0.199473	0.0155519	0.705188
6079	SNORD15A	0.212548	0.00986332	0.705188
6156	RPL30	0.218007	0.00809466	0.705188
6198	RPS6KB1	0.213443	0.00955166	0.705188
6241	RRM2	-0.213447	0.00955037	0.705188
6280	S100A9	0.211501	0.0102389	0.705188
6282	S100A11	0.203632	0.0134914	0.705188
6300	MAPK12	0.212854	0.00975581	0.705188
63933	CCDC90A	0.200062	0.0152442	0.705188
63977	PRDM15	0.199182	0.0157058	0.705188
640	BLK	0.213489	0.00953612	0.705188
64090	GAL3ST2	-0.199858	0.0153501	0.705188
64320	RNF25	0.202722	0.0139208	0.705188
643770	LOC643770	0.224346	0.00639875	0.705188
64710	NUCKS1	0.200489	0.0150247	0.705188
6489	ST8SIA1	0.219121	0.00777032	0.705188
64922	LRRC19	0.223428	0.00662285	0.705188
65124	ANKRD57	-0.211422	0.0102679	0.705188
65263	PYCRL	0.223035	0.00672088	0.705188
6616	SNAP25	0.200043	0.015254	0.705188
6653	SORL1	0.204561	0.0130652	0.705188
6725	SRMS	0.20126	0.0146353	0.705188
677823	SNORA42	0.208823	0.0112585	0.705188
6829	SUPT5H	-0.224902	0.0062665	0.705188
7037	TFRC	0.201467	0.0145318	0.705188
7082	TJP1	0.215502	0.00886782	0.705188
7277	TUBA4A	0.223417	0.00662566	0.705188
7329	UBE2I	0.208778	0.0112765	0.705188
7332	UBE2L3	0.220712	0.00732746	0.705188
7334	UBE2N	0.208064	0.0115633	0.705188
7499	XG	-0.21531	0.00892992	0.705188
7574	ZNF26	0.208283	0.0114746	0.705188
7596	ZNF45	0.205041	0.0128498	0.705188
7639	ZNF85	-0.209446	0.0110135	0.705188
7772	ZNF229	0.212567	0.00985665	0.705188
7884	SLBP	0.211853	0.0101114	0.705188
79183	TTPAL	-0.211558	0.0102183	0.705188
79667	FLJ13197	-0.218936	0.00782338	0.705188
79669	C3orf52	-0.226054	0.00599985	0.705188
79672	FN3KRP	0.209193	0.0111124	0.705188
797	CALCB	-0.211245	0.010333	0.705188
79800	ALS2CR8	0.207455	0.0118127	0.705188
79885	HDAC11	-0.211059	0.0104013	0.705188
79958	DENND1C	0.205997	0.01243	0.705188
80128	TRIM46	0.210553	0.0105901	0.705188
80305	TRABD	0.218857	0.00784622	0.705188
80761	UPK3B	0.202423	0.0140641	0.705188
8123	PAR5	0.20169	0.0144216	0.705188
81606	LBH	0.199499	0.015538	0.705188
8204	NRIP1	0.206726	0.0121179	0.705188
826	CAPNS1	0.208264	0.0114822	0.705188
8312	AXIN1	0.205245	0.0127592	0.705188
84255	SLC37A3	0.219424	0.00768438	0.705188
84288	EFCAB2	-0.204441	0.01312	0.705188
84433	CARD11	-0.210961	0.0104377	0.705188
84532	ACSS1	0.201116	0.0147071	0.705188
84925	DIRC2	0.207323	0.0118675	0.705188
8530	CST7	0.204765	0.0129732	0.705188
8576	STK16	0.223175	0.00668585	0.705188
8590	OR6A2	-0.214902	0.0090627	0.705188
8611	PPAP2A	0.200625	0.0149553	0.705188
8939	FUBP3	0.218298	0.00800886	0.705188
9013	TAF1C	0.200632	0.0149515	0.705188
90288	C3orf25	0.202242	0.0141518	0.705188
91543	RSAD2	-0.21594	0.008728	0.705188
91607	SLFN11	0.202008	0.0142658	0.705188
91687	CENPL	0.205782	0.0125235	0.705188
92285	ZNF585B	-0.20316	0.0137127	0.705188
92689	FAM114A1	0.201758	0.0143881	0.705188
9270	ITGB1BP1	-0.199892	0.0153324	0.705188
92922	CCDC102A	0.223273	0.00666134	0.705188
9329	GTF3C4	-0.216152	0.0086612	0.705188
94032	CAMK2N2	0.205241	0.0127608	0.705188
9409	PEX16	0.209998	0.0108007	0.705188
9758	FRMPD4	0.201992	0.0142732	0.705188
9844	ELMO1	0.207021	0.0119937	0.705188
137964	AGPAT6	0.198993	0.0158064	0.706124
257313	UTS2D	-0.198838	0.0158894	0.706124
51339	DACT1	0.198698	0.0159645	0.706124
57522	SRGAP1	-0.198732	0.0159462	0.706124
6857	SYT1	0.19874	0.0159422	0.706124
23283	CSTF2T	0.198373	0.0161405	0.711767
9497	SLC4A7	0.198305	0.0161775	0.711767
217	ALDH2	0.198192	0.0162394	0.71261
79157	MFSD11	0.198082	0.0162994	0.713366
26146	TRAF3IP1	0.197905	0.0163971	0.714391
2863	GPR39	0.197807	0.0164513	0.714391
5971	RELB	0.197863	0.01642	0.714391
64097	EPB41L4A	0.197659	0.016533	0.714853
9133	CCNB2	0.197633	0.0165477	0.714853
100132234	LOC100132234	-0.196892	0.0169639	0.716315
10260	DENND4A	0.197304	0.0167313	0.716315
121665	SPPL3	0.197331	0.0167165	0.716315
158572	LOC158572	0.197221	0.016778	0.716315
1841	DTYMK	0.196972	0.0169189	0.716315
284106	CISD3	0.197047	0.0168761	0.716315
55275	VPS53	-0.197278	0.0167462	0.716315
8321	FZD1	0.197062	0.0168675	0.716315
84988	PPP1R16A	-0.196885	0.0169682	0.716315
246705	LINC00314	0.196688	0.0170801	0.718172
4319	MMP10	0.196469	0.0172058	0.718172
4355	MPP2	0.196556	0.0171559	0.718172
5918	RARRES1	-0.196605	0.0171277	0.718172
8708	B3GALT1	-0.196431	0.0172275	0.718172
23294	ANKS1A	-0.196258	0.0173278	0.719758
55015	PRPF39	0.196216	0.0173519	0.719758
10262	SF3B4	-0.196114	0.0174111	0.720422
254099	LOC254099	-0.195721	0.0176407	0.722068
50940	PDE11A	0.195865	0.0175565	0.722068
63893	UBE2O	-0.195676	0.0176674	0.722068
81689	ISCA1	-0.195834	0.0175742	0.722068
84969	TOX2	-0.195763	0.0176163	0.722068
8538	BARX2	0.195574	0.0177275	0.722754
4794	NFKBIE	0.19546	0.0177945	0.722773
83642	SELO	0.195426	0.0178147	0.722773
23511	NUP188	0.195275	0.0179045	0.724626
84132	USP42	0.195204	0.0179473	0.724626
11129	CLASRP	-0.195094	0.0180127	0.724946
7150	TOP1	0.195045	0.0180421	0.724946
100130155	LOC100130155	0.194954	0.0180966	0.725385
5252	PHF1	0.194743	0.0182241	0.728745
55063	ZCWPW1	0.194531	0.0183524	0.729091
768211	RELL1	0.194565	0.0183317	0.729091
79862	ZNF669	0.194512	0.0183639	0.729091
9517	SPTLC2	0.193998	0.018679	0.739838
4734	NEDD4	-0.193889	0.0187468	0.740121
79940	LINC00472	0.193844	0.0187749	0.740121
100151684	RNU6ATAC	0.192264	0.0197772	0.742983
11314	CD300A	0.193602	0.0189254	0.742983
121227	LRIG3	-0.191773	0.0200982	0.742983
122961	ISCA2	0.192366	0.0197111	0.742983
148645	LINC00337	0.193462	0.0190129	0.742983
157777	C8orf45	0.191418	0.0203332	0.742983
163126	EID2	0.192442	0.0196622	0.742983
166614	DCLK2	0.192533	0.0196037	0.742983
203569	PAGE2	0.192729	0.0194776	0.742983
2199	FBLN2	0.191762	0.0201057	0.742983
220906	LOC220906	0.191241	0.0204515	0.742983
2268	FGR	0.193277	0.0191294	0.742983
256302	C17orf103	0.192892	0.0193737	0.742983
285973	ATG9B	0.192442	0.0196622	0.742983
3843	IPO5	0.192759	0.0194582	0.742983
4040	LRP6	0.192918	0.0193569	0.742983
4303	FOXO4	0.192155	0.0198484	0.742983
5027	P2RX7	0.193179	0.0191914	0.742983
5396	PRRX1	0.191403	0.0203432	0.742983
55454	CSGALNACT2	-0.192586	0.0195697	0.742983
55846	ITFG2	0.191822	0.0200659	0.742983
5613	PRKX	0.192714	0.0194872	0.742983
57415	C3orf14	0.191259	0.0204389	0.742983
60412	EXOC4	-0.192914	0.0193593	0.742983
606495	CYB5RL	-0.192336	0.0197307	0.742983
677803	SNORA15	-0.191259	0.0204389	0.742983
6872	TAF1	0.193111	0.0192344	0.742983
7314	UBB	0.191951	0.0199816	0.742983
79147	FKRP	-0.192419	0.0196769	0.742983
80021	TMEM62	0.191403	0.0203432	0.742983
80835	TAS1R1	0.192083	0.0198952	0.742983
84502	JPH4	0.191531	0.0202579	0.742983
8535	CBX4	-0.191565	0.0202354	0.742983
8854	ALDH1A2	0.192971	0.0193232	0.742983
93166	PRDM6	-0.19149	0.0202855	0.742983
9601	PDIA4	-0.191471	0.020298	0.742983
201191	SAMD14	0.190916	0.0206696	0.747649
22866	CNKSR2	0.190935	0.0206569	0.747649
11043	MID2	-0.190655	0.0208461	0.750774
55577	NAGK	0.190693	0.0208204	0.750774
10281	DSCR4	0.189522	0.0216285	0.751276
10716	TBR1	0.190459	0.0209799	0.751276
113278	C20orf54	0.189692	0.0215095	0.751276
152815	THAP6	0.189865	0.0213885	0.751276
22926	ATF6	0.190221	0.021143	0.751276
23334	SZT2	0.189416	0.0217028	0.751276
25788	RAD54B	-0.19019	0.0211638	0.751276
27434	POLM	0.190341	0.02106	0.751276
348327	ZNF530	-0.190209	0.0211508	0.751276
3747	KCNC2	0.189469	0.0216656	0.751276
392509	ARL13A	-0.189711	0.0214963	0.751276
440359	CSDAP1	0.189397	0.021716	0.751276
51294	PCDH12	0.189745	0.0214726	0.751276
55211	DPPA4	0.189525	0.0216258	0.751276
729852	LOC729852	0.189518	0.0216311	0.751276
80023	NRSN2	0.189718	0.0214911	0.751276
90007	MIDN	-0.18979	0.021441	0.751276
9479	MAPK8IP1	0.189865	0.0213885	0.751276
9541	CIR1	-0.190345	0.0210575	0.751276
100505906	LOC100505906	-0.188468	0.0223787	0.752101
10072	DPP3	0.188203	0.0225704	0.752101
10992	SF3B2	-0.188135	0.0226199	0.752101
1400	CRMP1	-0.18928	0.0217986	0.752101
158798	AKAP14	0.18823	0.0225512	0.752101
168448	CDC14C	0.188619	0.0222698	0.752101
191	AHCY	-0.188475	0.0223732	0.752101
2027	ENO3	0.188456	0.0223869	0.752101
27199	OXGR1	-0.188237	0.0225457	0.752101
3856	KRT8	0.188963	0.0220237	0.752101
55170	PRMT6	0.188842	0.0221099	0.752101
56852	RAD18	0.189102	0.0219243	0.752101
610	HCN2	0.18897	0.0220183	0.752101
7442	TRPV1	0.188218	0.0225594	0.752101
80086	TUBA4B	0.188555	0.022316	0.752101
80301	PLEKHO2	-0.188294	0.0225045	0.752101
83655	LINC00208	0.188551	0.0223187	0.752101
83933	HDAC10	0.188271	0.022521	0.752101
8639	AOC3	0.188105	0.022642	0.752101
8702	B4GALT4	-0.188657	0.0222426	0.752101
320	APBA1	0.18801	0.022711	0.752894
118738	ZNF488	-0.187833	0.0228412	0.755708
9765	ZFYVE16	0.187754	0.0228996	0.756139
100506564	LOC100506564	0.186938	0.0235076	0.758201
114826	SMYD4	-0.187134	0.02336	0.758201
1325	CORT	-0.187092	0.0233912	0.758201
146754	DNAH2	-0.187319	0.0232216	0.758201
26818	SNORD33	0.186941	0.0235048	0.758201
389827	TMEM8C	0.186987	0.0234706	0.758201
4858	NOVA2	0.187055	0.0234195	0.758201
50836	TAS2R8	0.187153	0.0233458	0.758201
57047	PLSCR2	0.187198	0.0233119	0.758201
6483	ST3GAL2	0.187334	0.0232103	0.758201
677777	SCARNA12	0.187289	0.0232441	0.758201
8624	PSMG1	0.187572	0.0230335	0.758201
23614	PPY2	0.186741	0.0236561	0.761516
65084	TMEM135	-0.186541	0.0238082	0.764936
140628	GATA5	-0.186352	0.0239525	0.768092
11223	MST1P9	0.186182	0.024083	0.770539
3579	CXCR2	0.186114	0.0241354	0.770539
868	CBLB	-0.186072	0.0241674	0.770539
144348	ZNF664	0.1858	0.0243781	0.771478
170627	XAGE5	0.185147	0.0248909	0.771478
192286	HIGD2A	0.185253	0.0248073	0.771478
23082	PPRC1	0.185166	0.0248759	0.771478
2519	FUCA2	0.185389	0.0247001	0.771478
25801	GCA	0.185313	0.0247596	0.771478
347127	FAM75D5	0.185706	0.0244517	0.771478
4991	OR1D2	-0.185366	0.0247179	0.771478
54429	TAS2R5	0.18546	0.0246437	0.771478
5537	PPP6C	0.185676	0.0244752	0.771478
6272	SORT1	0.185366	0.0247179	0.771478
83543	AIF1L	0.18591	0.0242931	0.771478
9118	INA	0.185721	0.0244399	0.771478
942	CD86	-0.185502	0.0246111	0.771478
9908	G3BP2	-0.185442	0.0246586	0.771478
975	CD81	-0.18503	0.0249837	0.77292
112885	PHF21B	-0.184773	0.0251884	0.77781
3097	HIVEP2	0.184474	0.0254281	0.780872
55062	WIPI1	0.184588	0.0253369	0.780872
7140	TNNT3	-0.184486	0.025419	0.780872
5033	P4HA1	0.184399	0.0254891	0.781306
374955	SPATA21	0.184331	0.0255441	0.781554
54499	TMCO1	0.184195	0.0256543	0.782246
6128	RPL6	0.184187	0.0256605	0.782246
10942	PRSS21	0.183979	0.0258298	0.783112
1583	CYP11A1	0.184066	0.0257589	0.783112
598	BCL2L1	-0.184013	0.025802	0.783112
125150	ZSWIM7	-0.18387	0.0259194	0.783156
1778	DYNC1H1	0.183806	0.0259721	0.783156
9158	FIBP	-0.183859	0.0259287	0.783156
11013	TMSB15A	-0.183583	0.0261557	0.784903
120586	OR8I2	0.183575	0.0261619	0.784903
3107	HLA-C	0.183564	0.0261713	0.784903
100499483	C9orf174	0.181116	0.0282625	0.789197
10586	MAB21L2	0.18325	0.0264315	0.789197
11094	C9orf7	0.181834	0.0276351	0.789197
112611	RWDD2A	0.182041	0.0274557	0.789197
123803	NTAN1	0.181501	0.0279242	0.789197
124842	TMEM132E	-0.183209	0.0264662	0.789197
125488	TTC39C	0.182593	0.0269842	0.789197
129530	LYG1	-0.182805	0.0268053	0.789197
132112	RTP1	-0.18118	0.0282059	0.789197
1346	COX7A1	0.182408	0.0271417	0.789197
134637	ADAT2	0.182053	0.0274459	0.789197
142940	TRUB1	0.180436	0.0288682	0.789197
150248	C22orf15	-0.180202	0.0290794	0.789197
1606	DGKA	0.180723	0.0286111	0.789197
162	AP1B1	0.181395	0.0280167	0.789197
1981	EIF4G1	-0.182854	0.0267639	0.789197
201266	SLC39A11	0.181856	0.0276154	0.789197
23095	KIF1B	0.179911	0.0293435	0.789197
23187	PHLDB1	0.183156	0.0265103	0.789197
26191	PTPN22	0.180103	0.0291683	0.789197
2778	GNAS	0.181554	0.027878	0.789197
2782	GNB1	0.182004	0.0274882	0.789197
285834	HCG22	-0.179982	0.0292781	0.789197
29841	GRHL1	0.179964	0.0292953	0.789197
29920	PYCR2	0.182117	0.0273907	0.789197
3081	HGD	0.180443	0.0288614	0.789197
3127	HLA-DRB5	-0.181962	0.027524	0.789197
319101	KRT73	-0.179914	0.02934	0.789197
3283	HSD3B1	0.18019	0.0290896	0.789197
338324	S100A7A	0.181278	0.0281195	0.789197
375612	LHFPL3	0.181615	0.0278253	0.789197
3787	KCNS1	-0.182808	0.0268021	0.789197
3817	KLK2	-0.180202	0.0290794	0.789197
4141	MARS	0.180436	0.0288682	0.789197
441054	C4orf47	-0.182808	0.0268021	0.789197
4627	MYH9	0.181611	0.0278286	0.789197
4927	NUP88	0.182797	0.0268117	0.789197
51434	ANAPC7	0.181845	0.0276252	0.789197
51719	CAB39	-0.180421	0.0288818	0.789197
54442	KCTD5	-0.182238	0.027287	0.789197
55032	SLC35A5	0.181845	0.0276252	0.789197
55039	TRMT12	0.180273	0.0290145	0.789197
5539	PPY	0.181777	0.0276842	0.789197
5673	PSG5	0.180942	0.0284163	0.789197
58476	TP53INP2	0.180149	0.0291272	0.789197
5913	RAPSN	0.180598	0.0287225	0.789197
64795	RMND5A	-0.182434	0.0271191	0.789197
677806	SNORA20	0.18044	0.0288648	0.789197
677849	SNORD1B	0.180927	0.0284297	0.789197
7058	THBS2	0.180787	0.0285539	0.789197
7408	VASP	-0.181025	0.0283427	0.789197
7518	XRCC4	0.181762	0.0276973	0.789197
79290	OR13A1	0.180549	0.0287665	0.789197
79629	OCEL1	-0.180084	0.0291855	0.789197
80067	DCAF17	0.18268	0.0269106	0.789197
81932	HDHD3	0.180137	0.0291375	0.789197
83860	TAF3	-0.18005	0.0292163	0.789197
84820	POLR2J4	0.180084	0.0291855	0.789197
863	CBFA2T3	0.182903	0.0267225	0.789197
8682	PEA15	0.180738	0.0285977	0.789197
8733	GPAA1	0.182098	0.0274069	0.789197
8916	HERC3	0.182298	0.0272352	0.789197
9278	ZBTB22	0.18206	0.0274394	0.789197
998	CDC42	0.181395	0.0280167	0.789197
127074	OR2T4	-0.179824	0.0294227	0.789248
3902	LAG3	0.179805	0.02944	0.789248
126006	PCP2	-0.179748	0.0294918	0.789368
1128	CHRM1	0.179635	0.0295957	0.789614
192669	EIF2C3	0.179673	0.0295611	0.789614
390084	OR56A5	0.179574	0.0296513	0.789832
159	ADSS	0.179382	0.0298289	0.792033
389715	FAM205B	0.179431	0.0297835	0.792033
157378	TMEM65	-0.179166	0.0300285	0.796065
4282	MIF	0.179027	0.0301586	0.798246
100130700	LOC100130700	0.178891	0.0302857	0.798695
1602	DACH1	0.17883	0.0303424	0.798695
51649	MRPS23	0.178804	0.0303672	0.798695
9686	VGLL4	-0.178838	0.0303353	0.798695
8431	NR0B2	-0.178415	0.0307342	0.807076
221395	GPR116	0.17835	0.0307952	0.807076
221421	RSPH9	0.178313	0.030831	0.807076
51199	NIN	-0.178245	0.0308957	0.807502
10166	SLC25A15	-0.178192	0.0309461	0.807554
60506	NYX	0.178026	0.031105	0.810431
5730	PTGDS	0.177901	0.0312246	0.812278
84648	LCE3D	-0.177738	0.0313811	0.815076
150946	FAM59B	0.177682	0.0314358	0.815228
8303	SNN	0.17761	0.0315052	0.81576
375791	C9orf169	-0.177485	0.0316261	0.817621
285848	PNPLA1	0.177395	0.0317143	0.817746
54498	SMOX	0.17738	0.031729	0.817746
112936	VPS26B	0.177028	0.0320729	0.821694
1591	CYP24A1	-0.177062	0.0320394	0.821694
171177	RHOV	-0.177145	0.0319579	0.821694
401068	LOC401068	-0.176998	0.0321026	0.821694
58524	DMRT3	0.176971	0.0321286	0.821694
55691	FRMD4A	0.176862	0.0322366	0.823194
5118	PCOLCE	0.176798	0.0323001	0.823553
51768	TM7SF3	-0.176707	0.0323899	0.824582
79085	SLC25A23	0.176488	0.0326077	0.828862
23181	DIP2A	0.176363	0.0327322	0.83076
100505566	LOC100505566	-0.176257	0.0328382	0.83092
6863	TAC1	0.176291	0.0328041	0.83092
6004	RGS16	0.176099	0.0329976	0.831555
63943	FKBPL	0.176087	0.033009	0.831555
6439	SFTPB	0.176084	0.0330129	0.831555
128861	BPIFA3	0.176012	0.0330852	0.832121
10430	TMEM147	-0.17574	0.0333608	0.832771
147111	NOTUM	0.175729	0.0333723	0.832771
3337	DNAJB1	-0.175865	0.0332342	0.832771
4693	NDP	0.175691	0.0334107	0.832771
4861	NPAS1	0.175781	0.0333185	0.832771
6697	SPR	0.175755	0.0333454	0.832771
619383	SCARNA9	0.175509	0.0335957	0.836132
1757	SARDH	0.175411	0.0336963	0.837101
8747	ADAM21	0.175373	0.033735	0.837101
100130301	LOC100130301	0.175219	0.0338943	0.837315
117	ADCYAP1R1	-0.175237	0.0338749	0.837315
402778	IFITM10	0.175241	0.033871	0.837315
11214	AKAP13	0.174357	0.0347917	0.840481
116437	LOC116437	-0.174539	0.0346011	0.840481
117584	RFFL	0.174229	0.0349272	0.840481
201299	RDM1	0.174618	0.034518	0.840481
203259	C9orf25	0.174406	0.03474	0.840481
23163	GGA3	0.174149	0.0350111	0.840481
26575	RGS17	0.174066	0.0350993	0.840481
28512	NKIRAS1	-0.174535	0.0346051	0.840481
285796	LOC285796	-0.17486	0.0342658	0.840481
3257	HPS1	-0.17472	0.0344114	0.840481
51297	BPIFA1	0.174384	0.0347638	0.840481
51704	GPRC5B	0.174414	0.034732	0.840481
55145	THAP1	-0.174897	0.0342265	0.840481
55423	SIRPG	0.174599	0.0345378	0.840481
57761	TRIB3	0.174289	0.0348634	0.840481
57805	KIAA1967	0.174603	0.0345338	0.840481
5891	MOK	0.174165	0.0349951	0.840481
64965	MRPS9	-0.174977	0.0341442	0.840481
8405	SPOP	0.174119	0.0350432	0.840481
84777	MGC11082	0.174399	0.0347479	0.840481
9567	GTPBP1	0.174036	0.0351313	0.840481
9728	SECISBP2L	-0.174153	0.0350071	0.840481
114659	LRRC37B	0.173964	0.0352077	0.8411
1959	EGR2	-0.173893	0.0352841	0.841285
414	ARSD	0.173862	0.0353163	0.841285
10625	IVNS1ABP	0.173772	0.0354132	0.842389
10961	ERP29	0.17359	0.0356075	0.843403
286077	FAM83H	0.17367	0.0355224	0.843403
7789	ZXDA	0.17359	0.0356075	0.843403
692312	PPAN-P2RY11	0.173488	0.0357172	0.844801
389690	FLJ43860	-0.17339	0.0358232	0.845063
6227	RPS21	0.173337	0.0358803	0.845063
8568	RRP1	-0.173379	0.0358354	0.845063
153328	SLC25A48	0.173152	0.0360809	0.84511
158399	ZNF483	0.173148	0.036085	0.84511
389538	MGC72080	0.173175	0.0360563	0.84511
5796	PTPRK	-0.173156	0.0360768	0.84511
112770	C1orf85	0.173016	0.0362289	0.84729
115196	ZNF554	0.1722	0.0371278	0.85042
25865	PRKD2	0.172589	0.0366968	0.85042
284185	LINC00482	-0.172215	0.037111	0.85042
55313	CPPED1	0.172714	0.0365597	0.85042
5992	RFX4	-0.172279	0.0370396	0.85042
6525	SMTN	0.172574	0.0367135	0.85042
773	CACNA1A	0.172691	0.0365846	0.85042
79618	HMBOX1	-0.172755	0.036514	0.85042
79746	ECHDC3	0.172846	0.0364147	0.85042
83714	NRIP2	0.172347	0.0369641	0.85042
84726	PRRC2B	0.172464	0.0368344	0.85042
8483	CILP	0.172336	0.0369767	0.85042
8832	CD84	-0.17248	0.0368177	0.85042
8904	CPNE1	-0.172291	0.037027	0.85042
9619	ABCG1	0.172514	0.0367802	0.85042
161635	CSNK1A1P1	0.171792	0.0375842	0.851517
388394	RPRML	0.171954	0.0374019	0.851517
55179	FAIM	0.171841	0.037529	0.851517
65264	UBE2Z	0.171856	0.037512	0.851517
79048	SECISBP2	0.171834	0.0375375	0.851517
79671	NLRX1	-0.17183	0.0375417	0.851517
84298	LLPH	0.171807	0.0375672	0.851517
9064	MAP3K6	-0.17189	0.0374739	0.851517
100288801	FRG2C	0.170655	0.0388814	0.852551
1021	CDK6	0.171456	0.0379639	0.852551
1123	CHN1	0.17146	0.0379596	0.852551
120425	AMICA1	0.170368	0.0392148	0.852551
138065	RNF183	0.170477	0.0390873	0.852551
1580	CYP4B1	0.170976	0.0385113	0.852551
166378	SPATA5	0.170972	0.0385156	0.852551
22876	INPP5F	0.170681	0.0388508	0.852551
27133	KCNH5	0.170534	0.0390214	0.852551
283953	TMEM114	0.170451	0.039118	0.852551
286102	TMED10P1	0.171293	0.0381485	0.852551
3336	HSPE1	0.170621	0.0389207	0.852551
390181	OR5AK2	-0.171395	0.0380325	0.852551
4810	NHS	-0.171271	0.0381743	0.852551
5157	PDGFRL	-0.171633	0.037763	0.852551
5535	PPP3R2	-0.171437	0.0379853	0.852551
55876	GSDMB	0.171516	0.0378954	0.852551
60598	KCNK15	0.171138	0.0383252	0.852551
6130	RPL7A	0.170394	0.039184	0.852551
64768	IPPK	0.171014	0.0384679	0.852551
65992	DDRGK1	-0.170572	0.0389776	0.852551
676	BRDT	0.171157	0.0383036	0.852551
79169	C1orf35	0.171014	0.0384679	0.852551
79170	PRR15L	0.170851	0.0386546	0.852551
79725	THAP9	0.171475	0.0379425	0.852551
83849	SYT15	0.170878	0.0386242	0.852551
9242	MSC	0.17039	0.0391884	0.852551
92799	SHKBP1	0.170443	0.0391268	0.852551
9520	NPEPPS	0.170549	0.0390039	0.852551
9588	PRDX6	0.171059	0.038416	0.852551
9725	TMEM63A	0.170496	0.0390653	0.852551
54834	GDAP2	0.170307	0.0392853	0.852971
58511	DNASE2B	0.170202	0.0394089	0.853433
6320	CLEC11A	-0.170205	0.0394045	0.853433
10162	LPCAT3	-0.169548	0.0401801	0.854771
10480	EIF3M	0.169703	0.0399962	0.854771
10614	HEXIM1	0.169635	0.0400768	0.854771
140545	RNF32	0.169722	0.0399738	0.854771
150622	LOC150622	0.169733	0.0399604	0.854771
22832	KIAA1009	0.16965	0.0400589	0.854771
27101	CACYBP	0.169903	0.0397595	0.854771
284439	SLC25A42	-0.169412	0.0403421	0.854771
4194	MDM4	0.169646	0.0400634	0.854771
4857	NOVA1	0.16951	0.040225	0.854771
51661	FKBP7	-0.169888	0.0397773	0.854771
54785	C17orf59	0.16996	0.0396927	0.854771
5590	PRKCZ	0.169812	0.0398665	0.854771
59307	SIGIRR	0.16954	0.0401891	0.854771
6324	SCN1B	-0.169412	0.0403421	0.854771
729970	LOC729970	0.169873	0.0397951	0.854771
9410	SNRNP40	-0.169442	0.0403061	0.854771
1146	CHRNG	0.169299	0.0404776	0.856553
9650	MTFR1	0.169253	0.0405319	0.856615
283212	KLHL35	0.169068	0.0407542	0.858147
57158	JPH2	0.169102	0.0407133	0.858147
9130	FAM50A	-0.169064	0.0407588	0.858147
5460	POU5F1	0.168996	0.0408407	0.858788
2854	GPR32	-0.168909	0.0409456	0.858802
333926	PPM1J	0.168925	0.0409274	0.858802
51542	VPS54	0.168868	0.0409959	0.858802
100033420	SNORD116-8	-0.168078	0.0419605	0.859272
10971	YWHAQ	-0.168339	0.04164	0.859272
124512	METTL23	-0.166866	0.0434792	0.859272
1392	CRH	0.167837	0.0422597	0.859272
148362	BROX	-0.166832	0.0435224	0.859272
148741	ANKRD35	-0.16707	0.0432205	0.859272
161742	SPRED1	-0.168743	0.0411469	0.859272
1740	DLG2	0.167429	0.0427686	0.859272
2134	EXTL1	0.167795	0.0423113	0.859272
2170	FABP3	0.166526	0.0439132	0.859272
220074	LRTOMT	-0.167583	0.0425748	0.859272
221545	C6orf136	0.167561	0.0426031	0.859272
22911	WDR47	0.168044	0.0420025	0.859272
23336	SYNM	0.167361	0.042854	0.859272
23732	C9orf4	0.168626	0.0412893	0.859272
256369	LINC00521	-0.167168	0.0430965	0.859272
25828	TXN2	-0.167561	0.0426031	0.859272
26092	TOR1AIP1	-0.167225	0.043025	0.859272
27315	PGAP2	-0.167859	0.0422316	0.859272
2773	GNAI3	0.166643	0.0437633	0.859272
284827	KRTAP13-4	0.166431	0.0440344	0.859272
285878	LOC285878	-0.168656	0.0412525	0.859272
29855	UBN1	-0.168328	0.0416539	0.859272
353143	LCE3B	0.168433	0.0415243	0.859272
363	AQP6	0.166971	0.0433449	0.859272
3735	KARS	0.166522	0.043918	0.859272
3854	KRT6B	-0.16809	0.0419465	0.859272
389072	PLEKHM3	0.166832	0.0435224	0.859272
390212	GPR152	0.166473	0.043981	0.859272
4041	LRP5	0.168354	0.0416214	0.859272
4162	MCAM	0.167191	0.0430679	0.859272
4190	MDH1	0.168135	0.0418907	0.859272
4233	MET	-0.166412	0.0440586	0.859272
4800	NFYA	0.166885	0.0434552	0.859272
4814	NINJ1	-0.166956	0.0433641	0.859272
4818	NKG7	0.167398	0.0428065	0.859272
4839	NOP2	0.167935	0.042138	0.859272
5073	PARN	0.166786	0.0435801	0.859272
50937	CDON	0.167874	0.0422128	0.859272
51084	CRYL1	0.168275	0.0417188	0.859272
51764	GNG13	0.166888	0.0434504	0.859272
5459	POU4F3	-0.166888	0.0434504	0.859272
55093	WDYHV1	0.168664	0.0412433	0.859272
55224	ETNK2	0.168452	0.0415012	0.859272
57418	WDR18	-0.166514	0.0439277	0.859272
57464	FAM40B	-0.167863	0.0422269	0.859272
59343	SENP2	-0.166597	0.0438213	0.859272
594837	SNORD101	0.166805	0.0435561	0.859272
64393	ZMAT3	-0.168535	0.0413997	0.859272
6507	SLC1A3	-0.168381	0.0415891	0.859272
6599	SMARCC1	-0.167821	0.0422785	0.859272
729900	LOC729900	0.167138	0.0431346	0.859272
7873	MANF	0.167039	0.0432588	0.859272
81558	FAM117A	0.166507	0.0439374	0.859272
84277	DNAJC30	0.167005	0.0433018	0.859272
84541	KBTBD8	0.168173	0.0418441	0.859272
84790	TUBA1C	-0.167172	0.0430917	0.859272
92162	TMEM88	0.166443	0.0440198	0.859272
93621	MRFAP1	0.166529	0.0439083	0.859272
55205	ZNF532	0.166231	0.0442922	0.862286
64849	SLC13A3	-0.166212	0.0443166	0.862286
125981	ACER1	0.16611	0.0444485	0.862839
84909	C9orf3	0.166121	0.0444338	0.862839
285126	DNAJC5G	0.166061	0.0445121	0.86307
79576	NKAP	0.166	0.0445905	0.863586
22864	R3HDM2	0.165846	0.044792	0.866481
132320	SCLT1	-0.165419	0.0453512	0.867075
133418	EMB	0.165604	0.045108	0.867075
2	A2M	0.165094	0.0457807	0.867075
23609	MKRN2	-0.164844	0.0461126	0.867075
23647	ARFIP2	0.165317	0.0454857	0.867075
257062	TMEM146	0.164837	0.0461227	0.867075
2646	GCKR	0.165623	0.0450833	0.867075
2700	GJA3	0.164958	0.0459615	0.867075
2801	GOLGA2	0.165672	0.0450189	0.867075
2896	GRN	0.165086	0.0457907	0.867075
306	ANXA3	0.165475	0.0452766	0.867075
30850	CDR2L	-0.165494	0.0452518	0.867075
441027	TMEM150C	0.165192	0.0456505	0.867075
5013	OTX1	-0.164988	0.0459213	0.867075
50809	HP1BP3	0.164852	0.0461025	0.867075
540	ATP7B	0.165279	0.0455356	0.867075
5434	POLR2E	0.164999	0.0459062	0.867075
57519	STARD9	0.164935	0.0459917	0.867075
60509	AGBL5	-0.165456	0.0453015	0.867075
7307	U2AF1	0.165079	0.0458008	0.867075
7745	ZNF192	0.165192	0.0456505	0.867075
79987	SVEP1	-0.165116	0.0457506	0.867075
91522	COL23A1	0.165736	0.044935	0.867075
9415	FADS2	0.164897	0.046042	0.867075
949	SCARB1	-0.165755	0.0449103	0.867075
6422	SFRP1	0.164625	0.0464059	0.871418
5601	MAPK9	0.164542	0.0465176	0.871742
6570	SLC18A1	-0.164535	0.0465278	0.871742
6737	TRIM21	-0.16447	0.0466142	0.872382
284403	WDR62	-0.164368	0.0467518	0.873976
10777	ARPP21	0.163001	0.0486296	0.8747
11063	SOX30	-0.163061	0.0485453	0.8747
115	ADCY9	0.162612	0.0491752	0.8747
1471	CST3	-0.162812	0.0488938	0.8747
153020	RASGEF1B	0.162585	0.0492125	0.8747
1668	DEFA3	0.163862	0.0474397	0.8747
1788	DNMT3A	0.162627	0.0491539	0.8747
1870	E2F2	0.163069	0.0485348	0.8747
219681	ARMC3	-0.163262	0.0482669	0.8747
23041	MON2	0.162963	0.0486823	0.8747
23051	ZHX3	0.163658	0.0477193	0.8747
23150	FRMD4B	0.162895	0.0487774	0.8747
23191	CYFIP1	0.163379	0.0481047	0.8747
23237	ARC	-0.164062	0.0471666	0.8747
23765	IL17RA	0.163855	0.0474501	0.8747
255480	LOC255480	0.164138	0.0470639	0.8747
266655	LINC00094	0.163779	0.0475535	0.8747
26872	STEAP1	0.164085	0.0471358	0.8747
27148	STK36	0.162551	0.0492604	0.8747
283932	FBXL19-AS1	0.163919	0.0473623	0.8747
285598	ARL10	0.162888	0.048788	0.8747
285962	FLJ40852	0.163265	0.0482617	0.8747
2949	GSTM5	0.16319	0.0483666	0.8747
3364	HUS1	-0.162517	0.0493084	0.8747
339807	LOC339807	0.163314	0.0481936	0.8747
343	AQP8	0.163813	0.0475069	0.8747
347736	NME9	0.16322	0.0483246	0.8747
353497	POLN	0.162801	0.0489097	0.8747
4143	MAT1A	0.163114	0.0484716	0.8747
4645	MYO5B	-0.164059	0.0471718	0.8747
4739	NEDD9	0.163994	0.0472592	0.8747
4841	NONO	-0.163889	0.0474036	0.8747
5267	SERPINA4	0.164059	0.0471718	0.8747
54187	NANS	0.162759	0.048968	0.8747
54413	NLGN3	0.163488	0.0479534	0.8747
55539	KCNQ1DN	0.162937	0.0487193	0.8747
56658	TRIM39	0.162876	0.0488039	0.8747
59350	RXFP1	-0.16274	0.0489945	0.8747
59352	LGR6	-0.162544	0.0492711	0.8747
7007	TECTA	0.163711	0.0476467	0.8747
734	OSGIN2	0.164221	0.0469512	0.8747
79679	VTCN1	-0.163673	0.0476986	0.8747
81618	ITM2C	0.162582	0.0492178	0.8747
84908	FAM136A	0.162906	0.0487616	0.8747
8516	ITGA8	-0.162695	0.0490582	0.8747
8683	SRSF9	-0.162653	0.0491167	0.8747
89857	KLHL6	0.162702	0.0490476	0.8747
90271	LINC00263	0.162657	0.0491114	0.8747
53916	RAB4B	0.162427	0.0494366	0.875111
728215	FAM155A	-0.162438	0.0494205	0.875111
100526693	ARPC4-TTLL3	-0.161743	0.050412	0.876559
11202	KLK8	-0.161951	0.0501139	0.876559
157927	C9orf62	0.161864	0.0502384	0.876559
168002	DACT2	0.161747	0.0504066	0.876559
219557	C7orf62	0.161954	0.0501085	0.876559
25831	HECTD1	-0.161841	0.0502709	0.876559
338809	C12orf74	0.16183	0.0502872	0.876559
353355	ZNF233	0.161743	0.050412	0.876559
51013	EXOSC1	-0.161935	0.0501356	0.876559
51275	C12orf47	0.161992	0.0500545	0.876559
5224	PGAM2	0.162241	0.0496991	0.876559
55061	SUSD4	0.161784	0.0503523	0.876559
5532	PPP3CB	0.161913	0.050168	0.876559
64897	C12orf43	0.161962	0.0500977	0.876559
79758	DHRS12	-0.162098	0.0499034	0.876559
84243	ZDHHC18	-0.162238	0.0497044	0.876559
8926	SNURF	0.161879	0.0502167	0.876559
283738	LOC283738	-0.161675	0.0505099	0.877346
1798	DPAGT1	0.161592	0.0506297	0.878513
10051	SMC4	0.160983	0.0515139	0.878703
10160	FARP1	-0.160281	0.0525514	0.878703
10392	NOD1	0.161127	0.0513041	0.878703
1103	CHAT	-0.160598	0.0520807	0.878703
11230	PRAF2	0.160337	0.0524671	0.878703
123811	FOPNL	-0.160957	0.0515527	0.878703
126119	JOSD2	0.161305	0.0510455	0.878703
140691	TRIM69	0.160723	0.0518968	0.878703
1419	CRYGB	0.160405	0.052366	0.878703
163	AP2B1	-0.160254	0.0525907	0.878703
163782	KANK4	0.160534	0.0521757	0.878703
23193	GANAB	0.161376	0.0509413	0.878703
23253	ANKRD12	0.160175	0.052709	0.878703
23641	LDOC1	0.160878	0.051669	0.878703
26010	SPATS2L	0.160519	0.052198	0.878703
283571	PROX2	0.160243	0.0526076	0.878703
284739	LINC00176	0.16019	0.0526865	0.878703
338657	CCDC84	-0.16033	0.0524783	0.878703
4809	NHP2L1	0.16019	0.0526865	0.878703
51161	C3orf18	0.160243	0.0526076	0.878703
51669	TMEM66	0.161108	0.0513317	0.878703
55276	PGM2	0.160541	0.0521645	0.878703
5578	PRKCA	-0.160496	0.0522316	0.878703
5593	PRKG2	0.161316	0.0510291	0.878703
56112	PCDHGA3	0.160149	0.0527485	0.878703
57698	KIAA1598	0.16081	0.0517689	0.878703
65005	MRPL9	-0.161033	0.0514421	0.878703
658	BMPR1B	0.161248	0.0511279	0.878703
6738	TROVE2	0.160677	0.0519636	0.878703
6809	STX3	-0.161203	0.0511939	0.878703
6866	TAC3	0.160439	0.0523156	0.878703
7353	UFD1L	0.160349	0.0524502	0.878703
79190	IRX6	-0.160541	0.0521645	0.878703
79656	BEND5	-0.160466	0.0522764	0.878703
8175	SF3A2	0.160795	0.0517911	0.878703
84881	RPUSD4	0.161135	0.0512931	0.878703
84886	C1orf198	0.16141	0.050892	0.878703
8608	RDH16	0.160753	0.0518523	0.878703
8943	AP3D1	-0.160432	0.0523268	0.878703
91775	FAM55C	0.161135	0.0512931	0.878703
100129550	LOC100129550	0.160024	0.0529349	0.880928
65244	SPATS2	-0.159918	0.0530936	0.882687
57461	ISY1	0.159858	0.0531844	0.883316
162655	ZNF519	0.159589	0.0535889	0.883351
201163	FLCN	-0.159544	0.0536575	0.883351
220382	FAM181B	0.159669	0.053469	0.883351
5533	PPP3CC	-0.159544	0.0536575	0.883351
57216	VANGL2	0.15962	0.0535432	0.883351
58499	ZNF462	0.15954	0.0536633	0.883351
7917	BAG6	0.159555	0.0536404	0.883351
84449	ZNF333	-0.159544	0.0536575	0.883351
9685	CLINT1	-0.159555	0.0536404	0.883351
23613	ZMYND8	0.159484	0.0537492	0.883893
11261	CHP	-0.159389	0.0538926	0.884506
51439	FAM8A1	-0.159397	0.0538811	0.884506
26263	FBXO22	-0.159295	0.0540363	0.885406
89953	KLC4	-0.159283	0.0540535	0.885406
10330	CNPY2	-0.158834	0.0547422	0.886427
115811	IQCD	-0.15911	0.0543189	0.886427
23381	SMG5	0.158996	0.0544925	0.886427
27067	STAU2	0.158826	0.0547538	0.886427
283403	LOC283403	0.158951	0.0545621	0.886427
55788	LMBRD1	-0.158872	0.0546841	0.886427
56934	CA10	0.158875	0.0546782	0.886427
7681	MKRN3	0.158864	0.0546957	0.886427
8347	HIST1H2BC	-0.159053	0.0544057	0.886427
8737	RIPK1	-0.158841	0.0547306	0.886427
8930	MBD4	0.15914	0.0542727	0.886427
963	CD53	0.158932	0.0545911	0.886427
100033430	SNORD116-18	-0.158573	0.0551448	0.887149
100124535	SNORA36C	-0.147651	0.0743437	0.887149
100125288	ZGLP1	-0.148369	0.0729344	0.887149
100131213	ZNF503-AS2	-0.155162	0.0606432	0.887149
100134713	LOC100134713	0.158335	0.0555146	0.887149
10014	HDAC5	-0.146348	0.0769591	0.887149
100505955	LOC100505955	0.152608	0.065048	0.887149
100506115	LOC100506115	0.14226	0.0856475	0.887149
100506334	LOC100506334	0.145483	0.0787359	0.887149
100653224	LOC100653224	-0.144319	0.0811777	0.887149
10168	ZNF197	0.154006	0.0626058	0.887149
10233	LRRC23	0.149729	0.0703236	0.887149
10272	FSTL3	0.142022	0.0861767	0.887149
10427	SEC24B	-0.155842	0.0595126	0.887149
10454	TAB1	-0.150802	0.068318	0.887149
10465	PPIH	0.146911	0.0758206	0.887149
10486	CAP2	-0.146684	0.0762774	0.887149
10513	APPBP2	0.148244	0.0731776	0.887149
10557	RPP38	-0.155585	0.0599377	0.887149
1057	CELP	-0.154482	0.0617915	0.887149
1059	CENPB	0.148547	0.0725891	0.887149
10636	RGS14	0.153673	0.0631797	0.887149
10766	TOB2	-0.148868	0.0719681	0.887149
10793	ZNF273	-0.148906	0.0718953	0.887149
10813	UTP14A	0.147058	0.0755248	0.887149
1084	CEACAM3	-0.146624	0.0763996	0.887149
10912	GADD45G	-0.150942	0.0680602	0.887149
10924	SMPDL3A	0.148528	0.0726258	0.887149
10933	MORF4L1	0.153858	0.0628596	0.887149
1101	CHAD	0.154059	0.0625149	0.887149
11068	CYB561D2	0.153696	0.0631404	0.887149
11070	TMEM115	0.145645	0.0783998	0.887149
11098	PRSS23	-0.142861	0.0843235	0.887149
11113	CIT	0.14843	0.0728167	0.887149
11118	BTN3A2	-0.151833	0.0664344	0.887149
1112	FOXN3	0.14234	0.0854717	0.887149
11238	CA5B	0.147757	0.0741346	0.887149
11245	GPR176	0.1507	0.0685067	0.887149
112942	CCDC104	-0.158176	0.0557622	0.887149
11309	SLCO2B1	-0.153224	0.0639627	0.887149
11311	VPS45	0.151225	0.0675401	0.887149
11337	GABARAP	0.1507	0.0685067	0.887149
113402	SFT2D1	0.145638	0.0784154	0.887149
1142	CHRNB3	0.149589	0.0705883	0.887149
114783	LMTK3	-0.14251	0.0850959	0.887149
114793	FMNL2	0.151992	0.0661484	0.887149
114900	C1QTNF4	0.143688	0.0825269	0.887149
116150	NUS1	-0.148754	0.0721868	0.887149
116540	MRPL53	-0.146873	0.0758966	0.887149
116840	CNTROB	0.15597	0.059301	0.887149
118611	C10orf90	0.156813	0.0579285	0.887149
119772	OR52M1	0.147368	0.074906	0.887149
120400	FAM55A	0.157806	0.0563435	0.887149
1212	CLTB	0.147504	0.0746357	0.887149
121551	BTBD11	0.145011	0.0797196	0.887149
122553	TRAPPC6B	-0.142336	0.08548	0.887149
122830	NAA30	-0.146114	0.077437	0.887149
124222	PAQR4	-0.151626	0.0668104	0.887149
124454	EARS2	-0.153088	0.0642011	0.887149
124751	KRBA2	0.152801	0.0647068	0.887149
124930	ANKRD13B	0.153039	0.0642874	0.887149
126147	NTN5	0.15843	0.0553676	0.887149
126272	EID2B	0.150114	0.0695978	0.887149
126353	C19orf21	-0.147103	0.075434	0.887149
1264	CNN1	0.144557	0.0806733	0.887149
126969	SLC44A3	0.147051	0.07554	0.887149
130120	REG3G	0.145097	0.0795379	0.887149
130540	ALS2CR12	-0.151656	0.0667556	0.887149
131870	NUDT16	0.154599	0.0615924	0.887149
132884	EVC2	-0.156711	0.0580933	0.887149
136288		0.143904	0.0820644	0.887149
1363	CPE	-0.156665	0.0581666	0.887149
1387	CREBBP	-0.144512	0.0807692	0.887149
1410	CRYAB	0.146967	0.0757067	0.887149
142891	SAMD8	0.143832	0.0822183	0.887149
1437	CSF2	0.155082	0.0607763	0.887149
1441	CSF3R	0.158569	0.0551507	0.887149
144402	CPNE8	-0.148535	0.0726111	0.887149
1445	CSK	-0.151837	0.0664276	0.887149
145282	MIPOL1	-0.143514	0.0829017	0.887149
1454	CSNK1E	0.15396	0.0626838	0.887149
146310	RNF151	0.154455	0.0618365	0.887149
146481	LOC146481	0.144818	0.0801238	0.887149
147372	CCBE1	-0.154992	0.0609286	0.887149
147658	ZNF534	0.148645	0.0723987	0.887149
148	ADRA1A	0.141848	0.0865647	0.887149
149018	LELP1	0.15158	0.0668927	0.887149
149351	LOC149351	-0.148845	0.0720118	0.887149
151534	LOC151534	0.146333	0.0769899	0.887149
151658	LOC151658	-0.152204	0.0657687	0.887149
152485	ZNF827	0.142695	0.0846883	0.887149
153571	C5orf38	0.152914	0.0645068	0.887149
153579	BTNL9	0.146865	0.0759118	0.887149
154092	LOC154092	0.151543	0.0669613	0.887149
154791	C7orf55	0.142086	0.0860336	0.887149
158158	RASEF	0.144066	0.0817168	0.887149
158248	TTC16	0.150016	0.0697822	0.887149
1603	DAD1	0.142521	0.0850709	0.887149
162417	NAGS	0.143685	0.082535	0.887149
163131	ZNF780B	0.149657	0.0704594	0.887149
163486	DENND1B	-0.151883	0.0663458	0.887149
163882	CNST	0.149899	0.0700026	0.887149
1645	AKR1C1	0.156824	0.0579102	0.887149
165057	FLJ39061	0.142627	0.0848378	0.887149
166647	GPR125	-0.153027	0.0643073	0.887149
1674	DES	0.141694	0.0869117	0.887149
167691	LCA5	0.141746	0.0867931	0.887149
1736	DKC1	0.143692	0.0825188	0.887149
1802	DPH2	-0.147829	0.073993	0.887149
1805	DPT	-0.146004	0.0776613	0.887149
1812	DRD1	0.152517	0.0652091	0.887149
1890	TYMP	0.147258	0.0751244	0.887149
1942	EFNA1	0.148532	0.0726184	0.887149
1943	EFNA2	-0.141841	0.0865816	0.887149
195814	SDR16C5	-0.142634	0.0848212	0.887149
195827	C9orf21	0.15775	0.056433	0.887149
1965	EIF2S1	-0.153307	0.0638173	0.887149
199713	NLRP7	-0.147954	0.0737476	0.887149
200232	FAM209A	0.150896	0.0681437	0.887149
200424	TET3	0.143329	0.0833024	0.887149
200844	C3orf67	0.157859	0.0562602	0.887149
203414	CXorf24	-0.144433	0.0809372	0.887149
2040	STOM	0.142967	0.0840921	0.887149
2050	EPHB4	0.149703	0.0703736	0.887149
2109	ETFB	-0.154716	0.061394	0.887149
2157	F8	0.143469	0.0829997	0.887149
218	ALDH3A1	-0.14662	0.0764072	0.887149
219417	OR8U1	0.148373	0.072927	0.887149
219431	OR4S2	-0.150972	0.0680046	0.887149
219927	MRPL21	0.143919	0.082032	0.887149
219965	OR5B17	0.157224	0.0572672	0.887149
220	ALDH1A3	-0.152683	0.0649141	0.887149
220032	GDPD4	0.142449	0.0852294	0.887149
2204	FCAR	-0.152279	0.0656335	0.887149
221061	FAM171A1	0.143072	0.0838612	0.887149
221400	TDRD6	0.153095	0.0641878	0.887149
221711	SYCP2L	0.156858	0.0578554	0.887149
222	ALDH3B2	0.146004	0.0776613	0.887149
222234	FAM185A	0.151954	0.0662164	0.887149
2257	FGF12	0.156843	0.0578798	0.887149
2259	FGF14	0.152646	0.064981	0.887149
22837	COBLL1	-0.148388	0.0728976	0.887149
22845	DOLK	0.153295	0.0638371	0.887149
22877	MLXIP	0.150681	0.0685416	0.887149
229	ALDOB	-0.143099	0.0838035	0.887149
22900	CARD8	0.150122	0.0695836	0.887149
23032	USP33	0.145113	0.0795063	0.887149
23043	TNIK	0.147988	0.0736808	0.887149
23216	TBC1D1	0.149351	0.071041	0.887149
23240	KIAA0922	0.14203	0.0861598	0.887149
23255	CCDC165	-0.151384	0.0672502	0.887149
23261	CAMTA1	0.150277	0.0692937	0.887149
23291	FBXW11	0.141943	0.0863536	0.887149
23382	AHCYL2	0.146185	0.0772903	0.887149
23409	SIRT4	0.153764	0.0630228	0.887149
23410	SIRT3	0.148433	0.0728093	0.887149
23414	ZFPM2	0.148683	0.0723256	0.887149
23450	SF3B3	-0.158063	0.0559396	0.887149
2346	FOLH1	-0.144402	0.0810013	0.887149
23460	ABCA6	0.145887	0.0779016	0.887149
23466	CBX6	0.154818	0.0612215	0.887149
23471	TRAM1	0.152472	0.0652898	0.887149
23500	DAAM2	0.145275	0.0791675	0.887149
23521	RPL13A	-0.142578	0.084946	0.887149
2354	FOSB	-0.154391	0.0619459	0.887149
23648	SSBP3	0.154206	0.0622622	0.887149
23741	EID1	-0.152959	0.0644269	0.887149
23770	FKBP8	0.144587	0.0806095	0.887149
241	ALOX5AP	-0.142302	0.0855554	0.887149
246312	C21orf91-OT1	0.144395	0.0810173	0.887149
2532	DARC	0.142865	0.0843153	0.887149
253260	RICTOR	-0.154365	0.061991	0.887149
253573	LOC253573	-0.152544	0.0651621	0.887149
255231	MCOLN2	0.151509	0.0670231	0.887149
256126	SYCE2	0.143919	0.082032	0.887149
256297	PTF1A	0.155951	0.0593321	0.887149
256355	RPS2P32	0.156363	0.0586576	0.887149
257101	ZNF683	-0.143001	0.0840178	0.887149
25764	C15orf63	0.15713	0.0574183	0.887149
25770	C22orf31	0.157515	0.0568038	0.887149
25886	POC1A	-0.153666	0.0631928	0.887149
25911	DPCD	0.153662	0.0631993	0.887149
25912	C1orf43	0.156926	0.0577459	0.887149
25920	COBRA1	-0.154093	0.0624565	0.887149
259215	LY6G6F	0.158278	0.0556029	0.887149
259230	SGMS1	-0.142812	0.0844312	0.887149
26123	TCTN3	-0.144142	0.0815556	0.887149
2620	GAS2	0.154474	0.0618043	0.887149
26223	FBXL21	0.144818	0.0801238	0.887149
26253	CLEC4E	0.14903	0.0716556	0.887149
26261	FBXO24	0.152547	0.0651554	0.887149
26548	ITGB1BP2	0.154735	0.061362	0.887149
26574	AATF	0.157984	0.0560641	0.887149
26610	ELP4	-0.15274	0.0648137	0.887149
26821	SNORA74A	0.146741	0.076163	0.887149
26984	SEC22A	-0.154255	0.0621781	0.887149
26996	GPR160	0.145683	0.0783218	0.887149
2703	GJA8	0.148256	0.0731554	0.887149
27032	ATP2C1	-0.150655	0.0685906	0.887149
27072	VPS41	-0.141992	0.0862441	0.887149
27183	VPS4A	0.145377	0.0789554	0.887149
27247	NFU1	0.152166	0.0658363	0.887149
2768	GNA12	0.152479	0.0652763	0.887149
2770	GNAI1	0.155506	0.0600695	0.887149
282969	C10orf125	-0.154436	0.0618686	0.887149
282980	LOC282980	-0.148932	0.0718444	0.887149
2831	NPBWR1	0.150198	0.0694421	0.887149
283130	SLC25A45	0.145434	0.0788378	0.887149
283150	FOXR1	0.146216	0.0772286	0.887149
283219	KCTD21	0.148188	0.0732883	0.887149
283417	DPY19L2	0.151384	0.0672502	0.887149
283481	LOC283481	0.158116	0.0558568	0.887149
283897	C16orf54	-0.147874	0.0739037	0.887149
283902	HTA	-0.150874	0.0681855	0.887149
284371	ZNF841	-0.144848	0.0800603	0.887149
284418	FAM71E2	0.151036	0.0678865	0.887149
284434	NWD1	0.145249	0.0792226	0.887149
284680	C1orf111	0.143344	0.0832697	0.887149
285286	LOC285286	0.144006	0.081846	0.887149
285382	C3orf70	-0.15393	0.0627358	0.887149
285954	LOC285954	-0.153345	0.0637514	0.887149
286184	LOC286184	0.155608	0.0599001	0.887149
286319	TUSC1	0.142234	0.0857062	0.887149
28964	GIT1	0.157636	0.0566122	0.887149
2902	GRIN1	-0.144009	0.0818379	0.887149
29078	NDUFAF4	0.153008	0.0643405	0.887149
29995	LMCD1	0.148124	0.073414	0.887149
3001	GZMA	-0.151633	0.0667967	0.887149
3065	HDAC1	0.154652	0.0615027	0.887149
3091	HIF1A	0.157965	0.0560938	0.887149
3112	HLA-DOB	0.142068	0.0860757	0.887149
3148	HMGB2	0.148883	0.071939	0.887149
3171	FOXA3	0.144977	0.0797908	0.887149
3176	HNMT	0.150058	0.0697042	0.887149
3187	HNRNPH1	-0.149094	0.0715323	0.887149
3189	HNRNPH3	0.148826	0.0720482	0.887149
3200	HOXA3	-0.141641	0.0870305	0.887149
3226	HOXC10	0.143091	0.08382	0.887149
3267	AGFG1	-0.149098	0.0715251	0.887149
332	BIRC5	-0.150065	0.06969	0.887149
339168	TMEM95	0.152955	0.0644336	0.887149
339291	LRRC30	0.146212	0.0772363	0.887149
339366	ADAMTSL5	-0.155385	0.0602707	0.887149
339524	LOC339524	-0.146586	0.0764761	0.887149
339976	TRIML1	0.151981	0.0661688	0.887149
339977	LRRC66	0.147051	0.07554	0.887149
34	ACADM	0.1524	0.0654176	0.887149
340152	ZC3H12D	-0.149967	0.0698746	0.887149
340277	C7orf46	0.146979	0.075684	0.887149
341346	C12orf70	0.143775	0.08234	0.887149
342865	VSTM2B	-0.15665	0.0581911	0.887149
3454	IFNAR1	-0.14379	0.0823076	0.887149
345557	PLCXD3	-0.142933	0.0841664	0.887149
348761	LOC348761	-0.158482	0.0552854	0.887149
3512	IGJ	0.157572	0.0567139	0.887149
353132	LCE1B	0.145925	0.077824	0.887149
3572	IL6ST	0.141792	0.0866915	0.887149
358	AQP1	0.154746	0.0613428	0.887149
3593	IL12B	0.150216	0.0694067	0.887149
360023	ZBTB41	-0.155139	0.0606812	0.887149
3627	CXCL10	0.145721	0.0782438	0.887149
3674	ITGA2B	-0.146952	0.0757371	0.887149
3683	ITGAL	0.152646	0.064981	0.887149
373	TRIM23	0.149933	0.0699386	0.887149
374383	B7H6	-0.153216	0.0639759	0.887149
375323	LHFPL4	0.14866	0.0723694	0.887149
375341	C3orf62	0.147916	0.0738219	0.887149
375704	ENHO	0.14172	0.0868524	0.887149
375743	PTAR1	0.152827	0.0646601	0.887149
3796	KIF2A	-0.145921	0.0778318	0.887149
3810	KIR2DS5	-0.143753	0.0823887	0.887149
386627	FLJ38109	0.145158	0.0794117	0.887149
388564	TMEM238	0.144066	0.0817168	0.887149
388886	FAM211B	0.15574	0.0596811	0.887149
3897	L1CAM	0.145819	0.0780415	0.887149
389932	tAKR	-0.142483	0.0851543	0.887149
390072	OR52N4	-0.152328	0.0655457	0.887149
390199	OR4D9	0.142804	0.0844477	0.887149
390637	C15orf58	0.142963	0.0841003	0.887149
392360	CTSL3	0.155642	0.0598437	0.887149
393	ARHGAP4	-0.142782	0.0844974	0.887149
40	ACCN1	0.149963	0.0698817	0.887149
400927	LOC400927	-0.144179	0.0814751	0.887149
4055	LTBR	0.150383	0.0690963	0.887149
4153	MBL2	-0.148237	0.0731923	0.887149
4157	MC1R	-0.144716	0.0803385	0.887149
4171	MCM2	0.146979	0.075684	0.887149
4214	MAP3K1	0.141924	0.0863958	0.887149
4247	MGAT2	-0.147697	0.074254	0.887149
4292	MLH1	-0.14583	0.0780182	0.887149
4296	MAP3K11	0.143613	0.0826897	0.887149
4330	MN1	-0.150099	0.0696262	0.887149
4363	ABCC1	0.147912	0.0738294	0.887149
440419	TBC1D3P5	0.146371	0.076913	0.887149
440503	PLIN5	0.148188	0.0732883	0.887149
441094	FLJ42709	0.14617	0.0773211	0.887149
442454	UQCRBP1	0.144848	0.0800603	0.887149
4498	MT1JP	-0.151588	0.066879	0.887149
4500	MT1L	0.155479	0.0601135	0.887149
4534	MTM1	0.156703	0.0581055	0.887149
476	ATP1A1	0.149321	0.0710987	0.887149
4760	NEUROD1	-0.146004	0.0776613	0.887149
481	ATP1B1	0.154603	0.061586	0.887149
4826	NNAT	-0.147829	0.073993	0.887149
4830	NME1	0.145562	0.0785716	0.887149
4864	NPC1	0.143722	0.0824537	0.887149
4889	NPY5R	0.158694	0.0549578	0.887149
4905	NSF	0.152393	0.0654311	0.887149
5045	FURIN	0.148437	0.072802	0.887149
50506	DUOX2	0.14767	0.0743063	0.887149
50509	COL5A3	0.158373	0.0554557	0.887149
50944	SHANK1	-0.14996	0.0698888	0.887149
5099	PCDH7	-0.148724	0.0722452	0.887149
51061	TXNDC11	-0.152971	0.064407	0.887149
51065	RPS27L	0.153779	0.0629966	0.887149
51167	CYB5R4	0.156745	0.0580383	0.887149
51196	PLCE1	0.157168	0.0573578	0.887149
51279	C1RL	0.148626	0.0724353	0.887149
51289	RXFP3	0.151743	0.0665983	0.887149
51341	ZBTB7A	-0.143205	0.0835732	0.887149
5136	PDE1A	-0.148554	0.0725744	0.887149
51371	POMP	0.156136	0.0590281	0.887149
51528	JKAMP	0.143998	0.0818622	0.887149
5154	PDGFA	-0.151172	0.0676369	0.887149
51608	GET4	-0.15506	0.0608144	0.887149
5172	SLC26A4	0.153481	0.0635143	0.887149
51733	UPB1	0.148596	0.0724938	0.887149
51763	INPP5K	0.145785	0.0781115	0.887149
51776	ZAK	-0.142086	0.0860336	0.887149
5202	PFDN2	0.150655	0.0685906	0.887149
5210	PFKFB4	0.143114	0.0837706	0.887149
5223	PGAM1	0.15019	0.0694562	0.887149
5313	PKLR	-0.146522	0.0766062	0.887149
5360	PLTP	0.146491	0.0766675	0.887149
5376	PMP22	0.156435	0.0585407	0.887149
54059	YBEY	0.157716	0.0564867	0.887149
54329	GPR85	0.141637	0.087039	0.887149
54467	ANKIB1	0.157984	0.0560641	0.887149
54503	ZDHHC13	0.143212	0.0835568	0.887149
5453	POU3F1	0.149774	0.0702379	0.887149
54550	NECAB2	-0.145955	0.077762	0.887149
5456	POU3F4	0.143889	0.0820968	0.887149
54622	ARL15	0.143072	0.0838612	0.887149
54623	PAF1	0.149635	0.0705024	0.887149
54675	CRLS1	-0.148826	0.0720482	0.887149
54680	ZNHIT6	-0.144081	0.0816846	0.887149
54715	RBFOX1	0.148924	0.0718589	0.887149
54758	KLHDC4	0.145215	0.0792935	0.887149
54797	MED18	-0.147485	0.0746732	0.887149
5480	PPIC	0.153057	0.0642542	0.887149
54848	ARHGEF38	0.144376	0.0810574	0.887149
55075	UACA	-0.147576	0.0744933	0.887149
55084	SOBP	-0.142952	0.0841251	0.887149
5509	PPP1R3D	-0.146389	0.0768746	0.887149
55101	ATP5SL	0.151116	0.0677408	0.887149
55107	ANO1	0.144682	0.0804102	0.887149
55203	LGI2	0.15546	0.0601449	0.887149
55253	TYW1	0.158739	0.0548878	0.887149
55300	PI4K2B	0.145396	0.0789162	0.887149
55322	C5orf22	0.157334	0.0570923	0.887149
55339	WDR33	0.158093	0.0558923	0.887149
55357	TBC1D2	0.151403	0.0672157	0.887149
554	AVPR2	-0.150946	0.0680533	0.887149
55612	FERMT1	0.143224	0.0835321	0.887149
55671	SMEK1	-0.14829	0.0730891	0.887149
55743	CHFR	0.143579	0.082763	0.887149
55753	OGDHL	0.143326	0.0833106	0.887149
55885	LMO3	0.153889	0.0628075	0.887149
55893	ZNF395	0.15033	0.0691949	0.887149
55905	RNF114	0.152019	0.0661009	0.887149
55964	Septin 3	0.146858	0.075927	0.887149
5605	MAP2K2	0.158237	0.0556677	0.887149
5618	PRLR	-0.14764	0.0743661	0.887149
56244	BTNL2	0.157734	0.0564568	0.887149
5648	MASP1	-0.150402	0.069061	0.887149
56829	ZC3HAV1	0.155082	0.0607763	0.887149
56917	MEIS3	-0.142075	0.0860588	0.887149
56997	ADCK3	0.149257	0.0712213	0.887149
57003	CCDC47	-0.150745	0.0684228	0.887149
57007	CXCR7	-0.150247	0.0693502	0.887149
5709	PSMD3	0.156121	0.0590529	0.887149
57126	CD177	-0.152245	0.0656943	0.887149
57127	RHBG	0.154999	0.0609159	0.887149
57136	C20orf3	0.146204	0.0772517	0.887149
57175	CORO1B	0.154164	0.0623334	0.887149
57469	PNMAL2	-0.149555	0.0706529	0.887149
5747	PTK2	-0.145128	0.0794748	0.887149
575	BAI1	-0.147674	0.0742989	0.887149
57538	ALPK3	-0.146397	0.0768593	0.887149
57544	TXNDC16	-0.156533	0.058381	0.887149
5756	TWF1	-0.150137	0.0695553	0.887149
57595	PDZD4	0.158543	0.0551917	0.887149
57610	RANBP10	-0.154025	0.0625733	0.887149
57634	EP400	0.144017	0.0818218	0.887149
57662	CAMSAP3	0.151701	0.0666735	0.887149
57688	ZSWIM6	0.153246	0.063923	0.887149
5770	PTPN1	0.14934	0.0710626	0.887149
57732	ZFYVE28	0.147995	0.073666	0.887149
58	ACTA1	-0.145876	0.0779249	0.887149
583	BBS2	-0.141644	0.087022	0.887149
5836	PYGL	0.148947	0.0718153	0.887149
5867	RAB4A	0.157451	0.0569059	0.887149
5888	RAD51	0.145373	0.0789633	0.887149
5927	KDM5A	-0.151607	0.0668447	0.887149
5970	RELA	-0.152415	0.0653907	0.887149
6014	RIT2	0.154606	0.0615796	0.887149
60561	RINT1	0.141739	0.0868101	0.887149
60675	PROK2	0.143609	0.0826978	0.887149
6102	RP2	0.154988	0.060935	0.887149
6139	RPL17	0.155864	0.0594753	0.887149
6196	RPS6KA2	0.149695	0.0703879	0.887149
6259	RYK	0.156072	0.0591334	0.887149
6317	SERPINB3	0.148127	0.0734066	0.887149
6319	SCD	0.148275	0.0731186	0.887149
64132	XYLT2	0.146639	0.076369	0.887149
64150	DIO3OS	-0.142729	0.0846135	0.887149
64180	DPEP3	0.143609	0.0826978	0.887149
64208	POPDC3	-0.152487	0.0652629	0.887149
64218	SEMA4A	-0.15696	0.0576912	0.887149
6423	SFRP2	-0.152283	0.0656267	0.887149
64319	FBRS	0.146359	0.0769361	0.887149
64324	NSD1	-0.146979	0.075684	0.887149
643783	LOC643783	-0.147289	0.0750641	0.887149
64405	CDH22	0.152782	0.0647402	0.887149
64429	ZDHHC6	-0.149359	0.0710266	0.887149
6453	ITSN1	-0.150186	0.0694633	0.887149
64579	NDST4	-0.15475	0.0613364	0.887149
64582	GPR135	0.156726	0.0580688	0.887149
646024	RAET1K	-0.143031	0.0839518	0.887149
646762	LOC646762	0.141901	0.0864465	0.887149
64682	ANAPC1	0.145453	0.0787986	0.887149
64789	DEM1	0.157376	0.0570261	0.887149
64794	DDX31	0.148282	0.0731038	0.887149
64852	TUT1	-0.146265	0.0771284	0.887149
6491	STIL	0.142317	0.0855219	0.887149
64926	RASAL3	0.152283	0.0656267	0.887149
65122	PRAMEF2	0.150745	0.0684228	0.887149
653808	ZG16	0.143409	0.0831305	0.887149
654	BMP6	0.158116	0.0558568	0.887149
6583	SLC22A4	0.153405	0.0636459	0.887149
6594	SMARCA1	0.154198	0.0622751	0.887149
65982	ZSCAN18	0.142952	0.0841251	0.887149
66035	SLC2A11	-0.149502	0.0707533	0.887149
6622	SNCA	0.14965	0.0704737	0.887149
6637	SNRPG	0.147719	0.0742092	0.887149
6641	SNTB1	0.154278	0.0621394	0.887149
6741	SSB	0.143405	0.0831387	0.887149
677797	SNORA7B	0.146828	0.0759878	0.887149
6801	STRN	-0.147999	0.0736585	0.887149
6837	MED22	0.144614	0.0805536	0.887149
6944	VPS72	0.147205	0.07523	0.887149
6947	TCN1	0.142034	0.0861514	0.887149
7042	TGFB2	-0.143968	0.0819268	0.887149
7090	TLE3	-0.151985	0.066162	0.887149
7126	TNFAIP1	0.157742	0.0564449	0.887149
7164	TPD52L1	0.145165	0.0793959	0.887149
7274	TTPA	0.144361	0.0810894	0.887149
7275	TUB	-0.143439	0.0830651	0.887149
7276	TTR	0.151252	0.0674917	0.887149
728361	OVOL3	-0.144331	0.0811536	0.887149
728609	SDHAP3	0.156412	0.0585776	0.887149
730	C7	0.142702	0.0846716	0.887149
7337	UBE3A	0.151807	0.0664822	0.887149
735301	SNHG9	0.143556	0.082812	0.887149
7384	UQCRC1	-0.154659	0.0614899	0.887149
7441	VPREB1	0.152842	0.0646334	0.887149
745	C11orf9	0.142328	0.0854968	0.887149
7454	WAS	0.143435	0.0830733	0.887149
7545	ZIC1	-0.152948	0.0644469	0.887149
7593	MZF1	0.158634	0.0550512	0.887149
7701	ZNF142	-0.15634	0.0586946	0.887149
7754	ZNF204P	0.146019	0.0776303	0.887149
778	CACNA1F	0.144603	0.0805775	0.887149
78987	CRELD1	0.150791	0.068339	0.887149
78995	C17orf53	0.146767	0.0761096	0.887149
79075	DSCC1	0.154085	0.0624694	0.887149
79092	CARD14	-0.146673	0.0763003	0.887149
79160	MGC4294	0.143246	0.0834829	0.887149
79414	LRFN3	0.142438	0.0852544	0.887149
79639	TMEM53	0.157791	0.0563674	0.887149
79654	HECTD3	0.148864	0.0719754	0.887149
79682	MLF1IP	-0.144032	0.0817895	0.887149
79689	STEAP4	0.154278	0.0621394	0.887149
79691	QTRTD1	0.142642	0.0848046	0.887149
79722	ANKRD55	0.144142	0.0815556	0.887149
79742	CXorf36	0.146386	0.0768823	0.887149
79789	CLMN	0.156862	0.0578493	0.887149
79805	VASH2	-0.142287	0.0855889	0.887149
79860	FLJ21369	-0.147863	0.073926	0.887149
79937	CNTNAP3	0.147243	0.0751546	0.887149
79974	C7orf58	0.145464	0.0787751	0.887149
80012	PHC3	0.150103	0.0696191	0.887149
80054	LOC80054	0.149748	0.0702878	0.887149
80055	PGAP1	-0.141803	0.0866662	0.887149
80114	BICC1	-0.147988	0.0736808	0.887149
80155	NAA15	0.141867	0.0865225	0.887149
80230	RUFY1	-0.157572	0.0567139	0.887149
80273	GRPEL1	0.153307	0.0638173	0.887149
80344	DCAF11	-0.143881	0.082113	0.887149
80345	ZSCAN16	-0.142559	0.0849876	0.887149
8036	SHOC2	-0.146937	0.0757674	0.887149
80723	TMEM22	0.151157	0.0676646	0.887149
80820	EEPD1	0.146291	0.0770745	0.887149
80852	GRIP2	-0.151403	0.0672157	0.887149
80863	PRRT1	0.152952	0.0644403	0.887149
80864	EGFL8	0.151713	0.066653	0.887149
81050	OR5AC2	-0.151988	0.0661552	0.887149
81552	VOPP1	-0.157572	0.0567139	0.887149
81555	YIPF5	0.146635	0.0763767	0.887149
8202	NCOA3	0.1573	0.0571466	0.887149
821	CANX	0.143964	0.0819349	0.887149
8228	PNPLA4	0.153639	0.0632386	0.887149
828	CAPS	0.145075	0.0795853	0.887149
8335	HIST1H2AB	-0.150768	0.0683809	0.887149
8341	HIST1H2BN	0.152861	0.0646001	0.887149
8365	HIST1H4H	-0.146571	0.0765067	0.887149
83733	SLC25A18	0.142381	0.0853797	0.887149
8387	OR1E1	0.146794	0.0760563	0.887149
84062	DTNBP1	0.150915	0.0681089	0.887149
84085	FBXO30	0.152317	0.065566	0.887149
84193	SETD3	0.142642	0.0848046	0.887149
84266	ALKBH7	0.146182	0.077298	0.887149
84299	MIEN1	0.151459	0.0671125	0.887149
8439	NSMAF	0.147931	0.0737922	0.887149
84419	C15orf48	-0.15713	0.0574183	0.887149
84519	ACRBP	0.157833	0.0563019	0.887149
84522	JAGN1	0.15713	0.0574183	0.887149
84658	EMR3	-0.148467	0.0727432	0.887149
84671	ZNF347	0.144765	0.0802351	0.887149
84733	CBX2	0.150473	0.0689274	0.887149
84824	FCRLA	0.144512	0.0807692	0.887149
8484	GALR3	0.144973	0.0797988	0.887149
84859	LRCH3	0.149778	0.0702307	0.887149
84871	AGBL4	0.144176	0.0814831	0.887149
84899	TMTC4	0.15308	0.0642144	0.887149
84900	RNFT2	0.144338	0.0811376	0.887149
84915	C12orf34	0.146363	0.0769284	0.887149
8498	RANBP3	-0.149812	0.0701665	0.887149
84983	MGC14436	0.14846	0.0727579	0.887149
8499	PPFIA2	0.146238	0.0771823	0.887149
85001	MGC16275	0.15118	0.0676231	0.887149
8514	KCNAB2	0.150651	0.0685976	0.887149
8520	HAT1	-0.154776	0.0612917	0.887149
85403	EAF1	0.142294	0.0855721	0.887149
85456	TNKS1BP1	-0.150012	0.0697893	0.887149
8575	PRKRA	0.156057	0.0591583	0.887149
8697	CDC23	0.152219	0.0657416	0.887149
875	CBS	-0.143692	0.0825188	0.887149
8766	RAB11A	0.144599	0.0805855	0.887149
8793	TNFRSF10D	-0.153586	0.0633304	0.887149
881	CCIN	0.144504	0.0807852	0.887149
8828	NRP2	0.155336	0.0603526	0.887149
8841	HDAC3	0.145086	0.0795616	0.887149
8856	NR1I2	0.155589	0.0599314	0.887149
8864	PER2	0.141928	0.0863874	0.887149
887	CCKBR	0.154093	0.0624565	0.887149
8880	FUBP1	0.154161	0.0623398	0.887149
8892	EIF2B2	-0.142007	0.0862104	0.887149
892	CCNC	0.143231	0.0835157	0.887149
8975	USP13	0.144142	0.0815556	0.887149
89781	HPS4	-0.14685	0.0759422	0.887149
89885	FATE1	0.156782	0.0579773	0.887149
89932	PAPLN	0.14189	0.0864718	0.887149
9001	HAP1	-0.152332	0.065539	0.887149
90075	ZNF30	0.154686	0.0614451	0.887149
9022	CLIC3	0.153518	0.0634486	0.887149
9032	TM4SF5	0.144977	0.0797908	0.887149
904	CCNT1	-0.151501	0.0670369	0.887149
9075	CLDN2	-0.146699	0.0762469	0.887149
91050	CCDC149	-0.142638	0.0848129	0.887149
9120	SLC16A6	0.151301	0.0674019	0.887149
9175	MAP3K13	-0.14611	0.0774447	0.887149
91750	LIN52	0.149348	0.0710482	0.887149
9208	LRRFIP1	-0.143979	0.0819026	0.887149
9236	CCPG1	0.145143	0.0794432	0.887149
9263	STK17A	0.142993	0.0840343	0.887149
93550	ZFAND4	-0.144229	0.0813705	0.887149
93594	WDR67	-0.142226	0.0857229	0.887149
939	CD27	0.153035	0.064294	0.887149
9419	CRIPT	0.144735	0.0802987	0.887149
9425	CDYL	0.143828	0.0822264	0.887149
9442	MED27	0.144992	0.0797592	0.887149
9453	GGPS1	0.142358	0.0854299	0.887149
9482	STX8	-0.155075	0.060789	0.887149
9550	ATP6V1G1	0.145925	0.077824	0.887149
9568	GABBR2	-0.146862	0.0759194	0.887149
9615	GDA	-0.15455	0.0616758	0.887149
9627	SNCAIP	-0.156295	0.0587686	0.887149
9637	FEZ2	0.151837	0.0664276	0.887149
9640	ZNF592	0.158516	0.0552327	0.887149
9653	HS2ST1	0.145902	0.0778706	0.887149
9669	EIF5B	0.150961	0.0680254	0.887149
968	CD68	-0.157387	0.0570081	0.887149
9695	EDEM1	0.144931	0.0798859	0.887149
9699	RIMS2	0.153239	0.0639362	0.887149
977	CD151	0.154565	0.0616502	0.887149
9782	MATR3	0.154863	0.061145	0.887149
9858	PPP1R26	0.141871	0.086514	0.887149
9878	TOX4	0.149737	0.0703093	0.887149
988	CDC5L	0.145354	0.0790025	0.887149
9907	KIAA0415	0.144754	0.0802589	0.887149
9925	ZBTB5	0.146548	0.0765526	0.887149
9929	JOSD1	-0.149215	0.0713008	0.887149
9935	MAFB	0.152472	0.0652898	0.887149
995	CDC25C	0.153273	0.0638768	0.887149
9965	FGF19	-0.152374	0.0654648	0.887149
4953	ODC1	-0.141603	0.0871154	0.887385
112495	GTF3C6	0.141576	0.0871749	0.887449
260434	PYDC1	-0.141425	0.0875153	0.890371
50999	TMED5	-0.141316	0.0877628	0.890715
51426	POLK	0.141354	0.0876774	0.890715
54974	THG1L	0.141384	0.0876092	0.890715
8351	HIST1H3D	-0.141338	0.0877116	0.890715
203562	TMEM31	0.141202	0.0880195	0.892321
729993	SHISA9	0.141199	0.088028	0.892321
100505821	LOC100505821	-0.141029	0.0884141	0.892947
1173	AP2M1	-0.140964	0.0885604	0.892947
134466	ZNF300P1	0.141104	0.0882424	0.892947
147746	HIPK4	0.140908	0.0886895	0.892947
148327	CREB3L4	-0.140779	0.0889829	0.892947
162073	ITPRIPL2	-0.140794	0.0889483	0.892947
193629	LINC00189	0.141032	0.0884055	0.892947
22921	MSRB2	-0.140938	0.0886206	0.892947
51187	RSL24D1	0.140844	0.0888361	0.892947
551	AVP	0.141029	0.0884141	0.892947
64221	ROBO3	-0.140866	0.0887843	0.892947
7012	TERC	0.141078	0.0883025	0.892947
7342	UBP1	0.140776	0.0889915	0.892947
83953	FCAMR	-0.14101	0.0884571	0.892947
84103	C4orf17	-0.140772	0.0890001	0.892947
8850	KAT2B	0.141006	0.0884657	0.892947
8888	MCM3AP	0.140874	0.0887671	0.892947
10223	GPA33	0.140742	0.0890693	0.893103
10347	ABCA7	0.140209	0.090295	0.893913
10904	BLCAP	0.140216	0.0902776	0.893913
113444	C1orf212	0.140405	0.0898414	0.893913
152118	C3orf79	-0.14056	0.0894851	0.893913
158866	ZDHHC15	0.140148	0.090435	0.893913
2039	EPB49	0.1405	0.089624	0.893913
205428	C3orf58	0.140375	0.0899111	0.893913
2123	EVI2A	-0.140031	0.0907066	0.893913
219736	STOX1	0.140296	0.0900942	0.893913
23708	GSPT2	0.140386	0.089885	0.893913
26025	PCDHGA12	-0.140375	0.0899111	0.893913
286207	C9orf117	-0.140005	0.090768	0.893913
322	APBB1	0.140084	0.0905839	0.893913
3562	IL3	0.140009	0.0907592	0.893913
4277	MICB	0.140553	0.0895024	0.893913
5048	PAFAH1B1	-0.140458	0.0897196	0.893913
5074	PAWR	0.140284	0.0901204	0.893913
51304	ZDHHC3	0.1405	0.089624	0.893913
51338	MS4A4A	0.139997	0.0907856	0.893913
5557	PRIM1	-0.140439	0.0897631	0.893913
56834	GPR137	-0.139986	0.0908119	0.893913
57673	BEND3	0.140254	0.0901902	0.893913
63925	ZNF335	0.140322	0.0900331	0.893913
64080	RBKS	0.140288	0.0901116	0.893913
64110	MAGEF1	0.140133	0.09047	0.893913
677771	SCARNA4	-0.140016	0.0907417	0.893913
677775	SCARNA5	0.140364	0.0899372	0.893913
7691	ZNF132	-0.140553	0.0895024	0.893913
79694	MANEA	0.140164	0.0904	0.893913
84033	OBSCN	0.140451	0.089737	0.893913
9424	KCNK6	-0.14008	0.0905926	0.893913
283455	KSR2	0.139933	0.0909349	0.894578
51250	C6orf203	0.139888	0.0910404	0.894578
56666	PANX2	-0.13991	0.0909877	0.894578
2543	GAGE1	0.139805	0.0912342	0.895427
2849	GPR26	-0.139823	0.0911901	0.895427
6676	SPAG4	0.139759	0.09134	0.895938
3250	HPR	0.139684	0.0915165	0.896615
57094	CPA6	-0.139684	0.0915165	0.896615
8818	DPM2	0.139635	0.0916315	0.897213
11243	PMF1	0.139215	0.0926173	0.897796
123920	CMTM3	0.13957	0.0917819	0.897796
134492	NUDCD2	0.138955	0.0932344	0.897796
1534	CYB561	0.13934	0.0923233	0.897796
157506	RDH10	0.138879	0.0934139	0.897796
1837	DTNA	0.138958	0.0932254	0.897796
201292	TRIM65	-0.139533	0.0918705	0.897796
23030	KDM4B	-0.139038	0.0930373	0.897796
255189	PLA2G4F	0.13951	0.0919237	0.897796
271	AMPD2	-0.138902	0.09336	0.897796
284578	LOC284578	0.139215	0.0926173	0.897796
327	APEH	0.139041	0.0930283	0.897796
339457	C1orf222	-0.139	0.0931269	0.897796
340591	CA5BP1	0.139457	0.0920479	0.897796
390151	OR8H2	-0.139121	0.0928405	0.897796
54541	DDIT4	0.138943	0.0932613	0.897796
54886	LPPR1	0.139389	0.0922077	0.897796
55909	BIN3	-0.139121	0.0928405	0.897796
56134	PCDHAC2	0.139446	0.0920745	0.897796
573	BAG1	-0.138879	0.0934139	0.897796
6235	RPS29	-0.139023	0.0930731	0.897796
63935	PCIF1	0.139525	0.0918882	0.897796
6518	SLC2A5	-0.13931	0.0923945	0.897796
6582	SLC22A2	-0.138883	0.0934049	0.897796
6602	SMARCD1	0.139385	0.0922166	0.897796
7844	RNF103	0.1394	0.0921811	0.897796
83902	KRTAP17-1	0.139204	0.0926441	0.897796
84107	ZIC4	0.139132	0.0928137	0.897796
85453	TSPYL5	0.138898	0.093369	0.897796
9038	TAAR5	0.138902	0.09336	0.897796
91057	CCDC34	-0.138996	0.0931358	0.897796
9397	NMT2	0.139174	0.0927155	0.897796
29970	SCHIP1	0.138819	0.0935577	0.89866
10229	COQ7	0.138739	0.0937466	0.898922
57654	KIAA1530	0.138777	0.0936566	0.898922
79019	CENPM	-0.138758	0.0937016	0.898922
27243	CHMP2A	0.138667	0.0939179	0.899529
51146	A4GNT	-0.138686	0.0938728	0.899529
1500	CTNND1	0.13835	0.0946779	0.901288
165055	CCDC138	-0.138343	0.0946961	0.901288
26019	UPF2	0.138411	0.0945328	0.901288
282566	LINC00515	-0.138403	0.0945509	0.901288
3021	H3F3B	0.138448	0.0944421	0.901288
54517	PUS7	-0.138395	0.094569	0.901288
57018	CCNL1	-0.138445	0.0944512	0.901288
6560	SLC12A4	-0.13852	0.0942701	0.901288
784	CACNB3	0.138388	0.0945872	0.901288
79575	ABHD8	0.138392	0.0945781	0.901288
9318	COPS2	-0.13838	0.0946053	0.901288
1062	CENPE	0.138259	0.094896	0.9015
163223	ZNF676	0.138199	0.0950416	0.9015
22822	PHLDA1	0.138157	0.0951417	0.9015
266629	SEC14L3	0.138154	0.0951509	0.9015
286046	XKR6	0.138297	0.0948051	0.9015
5332	PLCB4	-0.138252	0.0949142	0.9015
55374	TMCO6	-0.138157	0.0951417	0.9015
65975	STK33	0.138184	0.095078	0.9015
7133	TNFRSF1B	-0.13812	0.0952329	0.901765
100507589	LOC100507589	0.137685	0.0962862	0.901953
11091	WDR5	-0.137659	0.0963506	0.901953
158038	LINGO2	-0.137972	0.0955891	0.901953
1727	CYB5R3	0.137663	0.0963414	0.901953
26001	RNF167	0.138052	0.0953972	0.901953
286205	SCAI	0.137953	0.0956348	0.901953
29904	EEF2K	0.137723	0.0961943	0.901953
3281	HSBP1	0.138006	0.0955068	0.901953
3790	KCNS3	0.137636	0.0964059	0.901953
3805	KIR2DL4	-0.137897	0.0957722	0.901953
3836	KPNA1	0.137719	0.0962035	0.901953
4170	MCL1	-0.137953	0.0956348	0.901953
4995	OR3A2	0.137908	0.0957447	0.901953
51466	EVL	0.13784	0.0959096	0.901953
55204	GOLPH3L	-0.1377	0.0962494	0.901953
55839	CENPN	0.137972	0.0955891	0.901953
57172	CAMK1G	0.137621	0.0964427	0.901953
58498	MYL7	-0.137844	0.0959005	0.901953
7089	TLE2	0.137844	0.0959005	0.901953
79728	PALB2	-0.137901	0.095763	0.901953
91664	ZNF845	-0.13764	0.0963967	0.901953
9536	PTGES	0.137644	0.0963875	0.901953
51428	DDX41	-0.137515	0.0967009	0.903861
155370	SBDSP1	-0.13747	0.0968117	0.903883
4654	MYOD1	0.137481	0.096784	0.903883
10577	NPC2	0.137409	0.0969597	0.903956
149373	FLJ30430	0.137398	0.0969874	0.903956
5321	PLA2G4A	-0.137421	0.0969319	0.903956
84432	PROK1	-0.137345	0.097117	0.903956
9696	CROCC	-0.137375	0.0970429	0.903956
9897	KIAA0196	-0.137334	0.0971448	0.903956
10004	NAALADL1	0.137107	0.0977019	0.903985
115950	ZNF653	0.137028	0.0978975	0.903985
124857	WFIKKN2	0.137032	0.0978882	0.903985
147040	KCTD11	0.137024	0.0979068	0.903985
152573	SHISA3	-0.137202	0.0974695	0.903985
23469	PHF3	0.137273	0.0972931	0.903985
254528	C16orf73	-0.13713	0.0976461	0.903985
27115	PDE7B	-0.137153	0.0975903	0.903985
349667	RTN4RL2	-0.137107	0.0977019	0.903985
4085	MAD2L1	0.137304	0.0972189	0.903985
4345	CD200	0.137228	0.0974045	0.903985
51506	UFC1	-0.137051	0.0978416	0.903985
5498	PPOX	0.137107	0.0977019	0.903985
64799	IQCH	0.137145	0.0976089	0.903985
84282	RNF135	-0.136994	0.0979814	0.904173
6580	SLC22A1	0.136967	0.0980468	0.904275
2273	FHL1	0.136922	0.0981588	0.904308
29760	BLNK	0.13693	0.0981401	0.904308
883	CCBL1	0.136881	0.0982616	0.904755
4043	LRPAP1	-0.136858	0.0983177	0.904772
23787	MTCH1	0.136775	0.0985236	0.905169
4125	MAN2B1	0.136786	0.0984955	0.905169
4584	MUC3A	0.13679	0.0984862	0.905169
10049	DNAJB6	0.136442	0.0993508	0.905615
100506696	LOC100506696	0.136476	0.099266	0.905615
10256	CNKSR1	0.136303	0.0997002	0.905615
11133	KPTN	0.13642	0.0994074	0.905615
114787	GPRIN1	0.13642	0.0994074	0.905615
114823	LENG8	0.136612	0.0989271	0.905615
1260	CNGA2	-0.136246	0.0998422	0.905615
144100	PLEKHA7	-0.136427	0.0993885	0.905615
181	AGRP	-0.136291	0.0997286	0.905615
199746	U2AF1L4	0.136295	0.0997191	0.905615
23479	ISCU	0.136601	0.0989553	0.905615
265	AMELX	-0.136337	0.0996151	0.905615
2687	GGT5	0.136684	0.0987487	0.905615
28514	DLL1	0.136212	0.0999274	0.905615
4613	MYCN	0.136344	0.0995962	0.905615
51075	TMX2	0.136661	0.098805	0.905615
521	ATP5I	0.136321	0.0996529	0.905615
54856	GON4L	-0.136616	0.0989177	0.905615
55666	NPLOC4	-0.136544	0.0990964	0.905615
57221	KIAA1244	-0.136189	0.0999843	0.905615
64770	CCDC14	-0.136235	0.0998706	0.905615
677776	SCARNA8	-0.136571	0.0990306	0.905615
8301	PICALM	0.136189	0.0999843	0.905615
84672	TTTY6	0.136423	0.099398	0.905615
8528	DDO	0.136541	0.0991058	0.905615
9700	ESPL1	-0.136473	0.0992754	0.905615
899	CCNF	0.13614	0.100108	0.906239
100505741	SPATA1	-0.13478	0.103569	0.907047
100506214	LOC100506214	-0.135558	0.101577	0.907047
10291	SF3A1	0.135362	0.102077	0.907047
10471	PFDN6	0.134723	0.103716	0.907047
10668	CGRRF1	-0.135588	0.1015	0.907047
1105	CHD1	-0.134833	0.103433	0.907047
11201	POLI	-0.135724	0.101155	0.907047
114336	CGB2	-0.135588	0.1015	0.907047
114928	GPRASP2	0.134818	0.103472	0.907047
116449	CLNK	0.135755	0.101079	0.907047
126298	IRGQ	0.134784	0.10356	0.907047
128653	C20orf141	0.135452	0.101846	0.907047
140771	SMCR5	0.13518	0.10254	0.907047
145553	MDP1	-0.135781	0.101012	0.907047
148811	PM20D1	-0.134723	0.103716	0.907047
149699	GTSF1L	0.134863	0.103355	0.907047
170384	FUT11	-0.135044	0.102889	0.907047
23	ABCF1	0.1354	0.101981	0.907047
2301	FOXE3	-0.134942	0.103151	0.907047
242	ALOX12B	0.135146	0.102627	0.907047
2615	LRRC32	0.134848	0.103394	0.907047
26524	LATS2	0.135143	0.102637	0.907047
26580	BSCL2	0.134772	0.103589	0.907047
2693	GHSR	0.134999	0.103005	0.907047
27283	TINAG	-0.134882	0.103307	0.907047
285220	EPHA6	-0.135162	0.102589	0.907047
3350	HTR1A	-0.135611	0.101443	0.907047
339479	FAM5C	0.135358	0.102087	0.907047
348021	LINC00442	0.13472	0.103725	0.907047
3484	IGFBP1	0.135581	0.101519	0.907047
388585	HES5	-0.135728	0.101146	0.907047
4144	MAT2A	-0.135898	0.100716	0.907047
5108	PCM1	0.135826	0.100897	0.907047
51377	UCHL5	-0.135033	0.102918	0.907047
5286	PIK3C2A	0.135706	0.101203	0.907047
54880	BCOR	0.13506	0.10285	0.907047
55079	FEZF2	-0.135037	0.102908	0.907047
55207	ARL8B	-0.135222	0.102434	0.907047
55244	SLC47A1	-0.135581	0.101519	0.907047
55422	ZNF331	-0.134772	0.103589	0.907047
55771	PRR11	0.135128	0.102676	0.907047
58484	NLRC4	0.13501	0.102976	0.907047
6045	RNF2	0.136049	0.100335	0.907047
64757		0.134659	0.103882	0.907047
6591	SNAI2	-0.134644	0.103921	0.907047
6769	STAC	-0.135203	0.102482	0.907047
752	FMNL1	0.135713	0.101184	0.907047
79886	C9orf82	-0.134735	0.103686	0.907047
80006	C5orf44	0.134995	0.103015	0.907047
8034	SLC25A16	0.135581	0.101519	0.907047
80760	ITIH5	0.134901	0.103258	0.907047
8086	AAAS	0.134784	0.10356	0.907047
81532	MOB2	-0.134901	0.103258	0.907047
8288	EPX	-0.134633	0.10395	0.907047
8354	HIST1H3I	0.13597	0.100535	0.907047
83641	FAM107B	0.135588	0.1015	0.907047
83982	IFI27L2	0.135044	0.102889	0.907047
8424	BBOX1	-0.135456	0.101836	0.907047
84264	HAGHL	-0.135857	0.100821	0.907047
84268	RPAIN	0.135702	0.101213	0.907047
84330	ZNF414	0.135781	0.101012	0.907047
84557	MAP1LC3A	0.135894	0.100726	0.907047
84948	TIGD5	0.135214	0.102453	0.907047
9265	CYTH3	0.136027	0.100392	0.907047
9287	TAAR2	0.134799	0.103521	0.907047
9856	KIAA0319	0.134655	0.103891	0.907047
9955	HS3ST3A1	-0.136061	0.100307	0.907047
9973	CCS	-0.135301	0.102231	0.907047
9989	PPP4R1	0.134678	0.103833	0.907047
11140	CDC37	0.134448	0.10443	0.909026
26155	NOC2L	-0.134508	0.104273	0.909026
3475	IFRD1	0.13444	0.104449	0.909026
3933	LCN1	0.134448	0.10443	0.909026
7350	UCP1	0.134463	0.104391	0.909026
79411	GLB1L	-0.134395	0.104567	0.909577
128602	C20orf85	0.134217	0.10503	0.910052
140730	RIMS4	0.134179	0.105128	0.910052
2705	GJB1	0.134244	0.104961	0.910052
441518	FAM127C	0.134319	0.104764	0.910052
4547	MTTP	0.134172	0.105148	0.910052
54344	DPM3	0.134247	0.104951	0.910052
6006	RHCE	0.134217	0.10503	0.910052
7940	LST1	-0.134221	0.10502	0.910052
7975	MAFK	0.134232	0.10499	0.910052
8881	CDC16	0.134164	0.105168	0.910052
55239	OGFOD1	0.134134	0.105247	0.910262
11250	GPR45	-0.134074	0.105405	0.911156
10025	MED16	0.133956	0.105711	0.911271
10146	G3BP1	0.13404	0.105493	0.911271
10642	IGF2BP1	-0.133953	0.105721	0.911271
119682	OR51L1	0.133756	0.106237	0.911271
23093	TTLL5	0.13379	0.106148	0.911271
23473	CAPN7	-0.133911	0.10583	0.911271
308	ANXA5	0.133688	0.106416	0.911271
340075	ARSI	0.133885	0.1059	0.911271
391195	OR2T33	-0.133783	0.106168	0.911271
4257	MGST1	-0.133752	0.106247	0.911271
51109	RDH11	-0.133764	0.106217	0.911271
54674	LRRN3	0.133783	0.106168	0.911271
55159	RFWD3	0.133696	0.106396	0.911271
55746	NUP133	-0.133877	0.105919	0.911271
6382	SDC1	-0.133972	0.105672	0.911271
7301	TYRO3	-0.133673	0.106456	0.911271
79842	ZBTB3	0.133854	0.105979	0.911271
91289	LMF2	0.133681	0.106436	0.911271
9552	SPAG7	0.13387	0.105939	0.911271
80184	CEP290	-0.13362	0.106596	0.911997
10270	AKAP8	0.132978	0.108301	0.91246
10554	AGPAT1	0.132506	0.109569	0.91246
1295	COL8A1	0.133356	0.107295	0.91246
146556	C16orf89	-0.13311	0.107948	0.91246
153396	TMEM161B	0.133295	0.107456	0.91246
197258	FUK	-0.132453	0.109711	0.91246
2012	EMP1	-0.132732	0.108959	0.91246
2060	EPS15	-0.13322	0.107656	0.91246
2253	FGF8	-0.133348	0.107315	0.91246
23091	ZC3H13	0.132638	0.109212	0.91246
25972	UNC50	0.133235	0.107616	0.91246
26831	RNU5A-1	-0.132717	0.108999	0.91246
27319	BHLHE22	-0.133575	0.106715	0.91246
2842	GPR19	-0.132555	0.109436	0.91246
29083	GTPBP8	-0.133046	0.108119	0.91246
29966	STRN3	-0.13342	0.107125	0.91246
3195	TLX1	0.133424	0.107115	0.91246
360155	CYCSP52	-0.132653	0.109172	0.91246
3621	ING1	-0.133371	0.107255	0.91246
3741	KCNA5	0.133076	0.108039	0.91246
3834	KIF25	0.133178	0.107767	0.91246
4322	MMP13	0.1328	0.108776	0.91246
4726	NDUFS6	0.133431	0.107095	0.91246
51667	NUB1	0.132596	0.109324	0.91246
54708	2018-03-05	-0.132619	0.109263	0.91246
55359	STYK1	0.133004	0.10823	0.91246
55505	NOP10	-0.132755	0.108898	0.91246
5690	PSMB2	-0.132419	0.109803	0.91246
56948	SDR39U1	0.1326	0.109314	0.91246
5715	PSMD9	0.133023	0.10818	0.91246
57623	ZFAT	0.13277	0.108857	0.91246
5794	PTPRH	0.132899	0.108513	0.91246
5870	RAB6A	0.132411	0.109823	0.91246
6123	RPL3L	0.133054	0.108099	0.91246
6434	TRA2B	-0.132989	0.108271	0.91246
6755	SSTR5	0.132691	0.10907	0.91246
692073	SNORA16A	-0.133212	0.107677	0.91246
7280	TUBB2A	0.133159	0.107817	0.91246
7551	ZNF3	-0.132487	0.10962	0.91246
7739	ZNF185	-0.13243	0.109772	0.91246
776	CACNA1D	0.132441	0.109742	0.91246
79029	SPATA5L1	-0.132812	0.108746	0.91246
79153	GDPD3	0.132967	0.108331	0.91246
79541	OR2A4	0.132785	0.108817	0.91246
79660	PPP1R3B	0.132876	0.108574	0.91246
80142	PTGES2	0.133167	0.107797	0.91246
8148	TAF15	-0.133065	0.108069	0.91246
81553	FAM49A	-0.133326	0.107375	0.91246
8290	HIST3H3	0.13257	0.109395	0.91246
83446	CCDC70	0.132936	0.108412	0.91246
[truncated: 14,676 more rows]
