# Supplementary material for: The variability of expression of many genes and most functional pathways is observed to increase with age in brain transcriptome data
Source: bioRxiv preprint, doi:10.1101/526491, version 1 (2019-01-22)
Supplement: Supplemental Table 4 [file 526491_file06.xlsx]

## Sheet: regression
Entrez_Gene_ID	Gene_Symbol	IQR_young(mean)	IQR_old	p.value	p.adjust_fdr	Δvar(IQR)
65982	ZSCAN18	0.225014	0.697983	0	0	2.10196
768211	RELL1	0.327419	0.870497	0	0	1.65866
1540	CYLD	0.19751	0.524113	0	0	1.65361
3020	H3F3A	0.155576	0.410733	0	0	1.64008
54881	TEX10	0.159811	0.412461	0	0	1.58093
1837	DTNA	0.181193	0.467222	0	0	1.57859
55334	SLC39A9	0.154552	0.381331	0	0	1.46733
2175	FANCA	0.220204	0.536156	0	0	1.43481
4014	LOR	0.25865	0.629522	0	0	1.43388
54681	P4HTM	0.135454	0.327737	0	0	1.41954
493869	GPX8	0.174245	0.413543	0	0	1.37334
5715	PSMD9	0.25694	0.607461	0	0	1.36421
358	AQP1	0.415072	0.979138	0	0	1.35896
2831	NPBWR1	0.232877	0.548085	0	0	1.35354
255480	LOC255480	0.176455	0.414516	0	0	1.34914
246312	C21orf91-OT1	0.27923	0.655071	0	0	1.34599
51084	CRYL1	0.308101	0.720786	0	0	1.33945
142679	DUSP19	0.209877	0.488507	0	0	1.32759
54839	LRRC49	0.1471	0.342293	0	0	1.32693
5266	PI3	0.222135	0.513904	0	0	1.31348
5207	PFKFB1	0.294917	0.680081	0	0	1.30601
5532	PPP3CB	0.399747	0.913557	0	0	1.28534
92667	C20orf72	0.287901	0.656374	0	0	1.27986
1469	CST1	0.151792	0.344339	0	0	1.26849
90809	TMEM55B	0.186808	0.422966	0	0	1.26418
54988	ACSM5	0.0955444	0.216005	0	0	1.26078
79269	DCAF10	0.237366	0.536164	0	0	1.25881
145788	FLJ27352	0.285699	0.642409	0	0	1.24855
26515	FXC1	0.170385	0.382883	0.001	0.0288495	1.24716
65244	SPATS2	0.188583	0.423678	0	0	1.24664
55339	WDR33	0.181773	0.408343	0.0276	0.20482	1.24644
151835	CPNE9	0.349022	0.776794	0	0	1.22563
5300	PIN1	0.178851	0.397116	0	0	1.22037
8120	AP3B2	0.238681	0.525487	0.0002	0.00928969	1.20163
163223	ZNF676	0.325265	0.714643	0	0	1.19711
2952	GSTT1	1.3657	2.99539	0.011	0.126152	1.19331
29960	FTSJ2	0.159883	0.35008	0	0	1.18961
3065	HDAC1	0.177697	0.388803	0.0002	0.00928969	1.18801
9737	GPRASP1	0.350971	0.76776	0	0	1.18753
375484	C5orf25	0.231946	0.504008	0	0	1.17295
80097	MZT2B	0.176211	0.38284	0	0	1.17262
2052	EPHX1	0.229964	0.49952	0.0002	0.00928969	1.17217
4809	NHP2L1	0.146693	0.318591	0	0	1.17182
54765	TRIM44	0.21007	0.456068	0	0	1.17104
80227	PAAF1	0.164299	0.355847	0.0002	0.00928969	1.16584
4201	MEA1	0.196626	0.425569	0	0	1.16435
5329	PLAUR	0.240512	0.519533	0	0	1.16011
23240	KIAA0922	0.181689	0.392157	0	0	1.1584
8888	MCM3AP	0.143608	0.309516	0.0002	0.00928969	1.15528
100526832	PHOSPHO2-KLHL23	0.263866	0.568373	0	0	1.15402
58472	SQRDL	0.237772	0.511892	0	0	1.15286
54785	C17orf59	0.173751	0.373936	0	0	1.15213
91107	TRIM47	0.280517	0.602009	0	0	1.14607
4174	MCM5	0.283961	0.609339	0	0	1.14585
23080	AVL9	0.273748	0.587112	0	0	1.14472
333926	PPM1J	0.282147	0.602603	0	0	1.13578
4159	MC3R	0.201902	0.430687	0	0	1.13315
90589	ZNF625	0.311227	0.663152	0.0002	0.00928969	1.13077
55937	APOM	0.248471	0.529122	0	0	1.12951
59067	IL21	0.228046	0.483935	0	0	1.1221
1687	DFNA5	0.266259	0.564887	0	0	1.12157
79012	CAMKV	0.273836	0.580635	0	0	1.12038
79649	MAP7D3	0.148613	0.315102	0.0002	0.00928969	1.12029
100131187	TSTD1	0.250117	0.529928	0	0	1.11872
81894	SLC25A28	0.188423	0.398622	0.0004	0.0154398	1.11557
28984	C13orf15	0.428654	0.904813	0	0	1.11082
9515	STXBP5L	0.352185	0.742121	0.0006	0.0205441	1.10719
51324	SPG21	0.138431	0.291527	0.0002	0.00928969	1.10593
9202	ZMYM4	0.152549	0.321152	0.0002	0.00928969	1.10524
26027	ACOT11	0.150392	0.316493	0.0004	0.0154398	1.10446
148641	SLC35F3	0.314935	0.662042	0.0002	0.00928969	1.10216
25901	CCDC28A	0.338841	0.711114	0	0	1.09866
9341	VAMP3	0.426215	0.890918	0	0	1.0903
64080	RBKS	0.169461	0.353945	0.0006	0.0205441	1.08866
8454	CUL1	0.139335	0.290842	0	0	1.08735
4697	NDUFA4	0.210014	0.437502	0.0008	0.0250752	1.08321
1456	CSNK1G3	0.16162	0.336602	0	0	1.08267
3687	ITGAX	0.324239	0.673594	0	0	1.07746
677777	SCARNA12	0.170797	0.354441	0	0	1.07522
1066	CES1	0.37485	0.776932	0	0	1.07265
7750	ZMYM2	0.16068	0.332704	0	0	1.0706
64083	GOLPH3	0.168257	0.347746	0.0004	0.0154398	1.06675
6208	RPS14	0.11829	0.244422	0	0	1.06629
23229	ARHGEF9	0.21405	0.442158	0.0002	0.00928969	1.06568
256130	TMEM196	0.329825	0.680614	0	0	1.06356
57863	CADM3	0.228665	0.471141	0	0	1.0604
54965	PIGX	0.393213	0.810109	0	0	1.06023
27067	STAU2	0.281185	0.578311	0	0	1.05669
4724	NDUFS4	0.219195	0.450564	0	0	1.05554
9448	MAP4K4	0.174823	0.35929	0	0	1.05517
3021	H3F3B	0.342006	0.702357	0	0	1.05364
85365	ALG2	0.139303	0.285737	0	0	1.0512
2168	FABP1	0.278663	0.57156	0	0	1.05108
402573	C7orf61	0.320518	0.656056	0	0	1.04686
7350	UCP1	0.263841	0.538306	0.0016	0.0402413	1.04027
3598	IL13RA2	0.462153	0.942425	0	0	1.0392
26033	ATRNL1	0.268009	0.54644	0	0	1.03889
3092	HIP1	0.277143	0.564489	0.0002	0.00928969	1.03681
53826	FXYD6	0.10801	0.219666	0	0	1.03377
23345	SYNE1	0.14414	0.292403	0.002	0.0467087	1.02861
57559	STAMBPL1	0.274296	0.555968	0	0	1.02689
5836	PYGL	0.216462	0.438664	0.0012	0.0331841	1.02652
4438	MSH4	0.533293	1.08057	0.0006	0.0205441	1.02622
4807	NHLH1	0.177619	0.358952	0.0068	0.0951258	1.02091
6433	SFSWAP	0.259741	0.523985	0.0004	0.0154398	1.01733
8828	NRP2	0.258025	0.519989	0.0044	0.0751742	1.01526
56180	MOSPD1	0.215165	0.433027	0.0002	0.00928969	1.01253
2180	ACSL1	0.522871	1.05121	0	0	1.01045
6513	SLC2A1	0.292472	0.587082	0	0	1.00731
9444	QKI	0.241353	0.484194	0.001	0.0288495	1.00617
116844	LRG1	0.2795	0.560404	0.0066	0.0932669	1.00502
391322	LOC391322	0.425911	0.852937	0.0004	0.0154398	1.00262
441509	GLRA4	0.277621	0.555659	0	0	1.0015
26470	SEZ6L2	0.179787	0.359755	0	0	1.00101
285629	LOC285629	0.162965	0.325517	0.0004	0.0154398	0.997466
23066	CAND2	0.218435	0.436289	0	0	0.997341
384	ARG2	0.259813	0.518824	0	0	0.996916
1392	CRH	0.547251	1.09179	0	0	0.995047
53345	TM6SF2	0.232622	0.463642	0	0	0.993117
339175	METTL2A	0.199223	0.396742	0.0008	0.0250752	0.991452
65975	STK33	0.459905	0.915492	0	0	0.990612
3419	IDH3A	0.241598	0.480685	0.02	0.172977	0.989605
23279	NUP160	0.209027	0.41567	0.0006	0.0205441	0.988589
148189	LOC148189	0.309225	0.614828	0	0	0.988285
150946	FAM59B	0.226829	0.450919	0	0	0.987925
3270	HRC	0.274621	0.545504	0.0014	0.0366484	0.986389
152007	GLIPR2	0.337764	0.670766	0.0014	0.0366484	0.985901
25923	ATL3	0.329262	0.653646	0.0152	0.149799	0.985188
6304	SATB1	0.342133	0.678543	0.0008	0.0250752	0.983271
79135	APOO	0.192906	0.382426	0	0	0.982451
1340	COX6B1	0.222719	0.441337	0	0	0.981584
57282	SLC4A10	0.418592	0.829467	0.0002	0.00928969	0.981565
5655	KLK10	0.195348	0.387091	0	0	0.981546
84329	HVCN1	0.445234	0.882198	0.0012	0.0331841	0.981427
10301	DLEU1	0.195634	0.387485	0.0002	0.00928969	0.980667
64388	GREM2	0.318843	0.631494	0	0	0.980581
8992	ATP6V0E1	0.350538	0.693517	0	0	0.978436
10577	NPC2	0.42548	0.841147	0	0	0.976938
10256	CNKSR1	0.352433	0.696442	0.0004	0.0154398	0.976097
55832	CAND1	0.259088	0.511899	0.0008	0.0250752	0.97577
80746	TSEN2	0.227309	0.448035	0	0	0.97104
221178	SPATA13	0.272186	0.534843	0	0	0.964991
677815	SNORA34	0.211191	0.41428	0.0004	0.0154398	0.961638
3059	HCLS1	0.357721	0.701056	0.0004	0.0154398	0.959784
88745	RRP36	0.223405	0.437775	0	0	0.959555
58191	CXCL16	0.297253	0.581498	0.0052	0.0820341	0.956238
84792	C7orf70	0.202236	0.395257	0	0	0.954433
90637	ZFAND2A	0.210602	0.411267	0.0022	0.0495074	0.952815
54507	ADAMTSL4	0.236871	0.461801	0.0002	0.00928969	0.94959
5959	RDH5	0.206502	0.402407	0	0	0.948682
3683	ITGAL	0.16532	0.321965	0	0	0.947526
56341	PRMT8	0.184116	0.358527	0.0008	0.0250752	0.947288
10538	BATF	0.193794	0.377284	0.001	0.0288495	0.946829
2199	FBLN2	0.211566	0.411764	0.0006	0.0205441	0.946267
64838	FNDC4	0.267175	0.519457	0	0	0.944258
158798	AKAP14	0.286351	0.556582	0	0	0.943704
51289	RXFP3	0.220227	0.427969	0	0	0.94331
131474	CHCHD4	0.168637	0.327557	0	0	0.942376
140691	TRIM69	0.294734	0.572435	0.0136	0.142271	0.942206
8787	RGS9	0.310166	0.602282	0.0002	0.00928969	0.941808
140	ADORA3	0.555776	1.07867	0.0002	0.00928969	0.940838
1894	ECT2	0.369132	0.716397	0.0002	0.00928969	0.940758
23163	GGA3	0.148645	0.288191	0.0004	0.0154398	0.938797
3572	IL6ST	0.491294	0.952323	0	0	0.938397
140876	FAM65C	0.220138	0.426707	0	0	0.938363
340198	IFITM4P	0.439961	0.852617	0	0	0.93794
2821	GPI	0.210189	0.406799	0.0018	0.0435631	0.935392
9780	PIEZO1	0.443543	0.858259	0	0	0.935007
5202	PFDN2	0.215111	0.415881	0.0044	0.0751742	0.933329
4087	SMAD2	0.123165	0.237978	0	0	0.932179
92689	FAM114A1	0.251063	0.484789	0	0	0.930948
11245	GPR176	0.361453	0.697884	0	0	0.930774
91057	CCDC34	0.210119	0.405503	0	0	0.929871
8607	RUVBL1	0.170199	0.328448	0.001	0.0288495	0.929791
11156	PTP4A3	0.188508	0.362863	0.0044	0.0751742	0.924921
2498	FTH1P3	0.312885	0.6017	0	0	0.923068
27089	UQCRQ	0.118948	0.228718	0	0	0.922847
284443	ZNF493	0.554726	1.0662	0.0058	0.0872092	0.922036
11341	SCRG1	0.474145	0.909576	0	0	0.918352
2949	GSTM5	0.765803	1.46854	0.0006	0.0205441	0.917651
84261	FBXW9	0.280654	0.536276	0	0	0.910813
6637	SNRPG	0.180131	0.34413	0	0	0.910438
7003	TEAD1	0.295208	0.563557	0.0122	0.133751	0.909017
11052	CPSF6	0.232739	0.444237	0	0	0.908737
246119	TTTY10	0.269236	0.513717	0	0	0.908051
1933	EEF1B2	0.206361	0.393634	0.0016	0.0402413	0.9075
388165	UBE2Q2P1	0.213052	0.406117	0	0	0.906186
64789	DEM1	0.179844	0.342647	0.0022	0.0495074	0.905247
157574	FBXO16	0.389202	0.741373	0.0002	0.00928969	0.904854
805	CALM2	0.167051	0.317811	0.0006	0.0205441	0.902481
1917	EEF1A2	0.388881	0.739727	0	0	0.902195
127069	OR2T10	0.202727	0.385372	0.005	0.0804778	0.900937
390084	OR56A5	0.23459	0.445564	0	0	0.899335
6874	TAF4	0.353582	0.671189	0.0002	0.00928969	0.898254
3985	LIMK2	0.159422	0.302505	0	0	0.897513
22848	AAK1	0.334752	0.634452	0.0012	0.0331841	0.895291
100507769	LOC100507769	0.187027	0.354096	0.0002	0.00928969	0.893287
9462	RASAL2	0.211133	0.39952	0.0196	0.171205	0.892271
6749	SSRP1	0.192864	0.364921	0.0054	0.0838408	0.892113
55177	FAM82A2	0.186502	0.352686	0.0004	0.0154398	0.891056
6489	ST8SIA1	0.215757	0.40792	0	0	0.890646
339479	FAM5C	0.243359	0.459658	0	0	0.888804
85509	MBD3L1	0.242492	0.458	0	0	0.888719
407975	MIR17HG	0.215045	0.405737	0.0008	0.0250752	0.886757
7994	KAT6A	0.199242	0.375325	0.006	0.0892507	0.883763
83643	CCDC3	0.281976	0.530424	0.0028	0.0567315	0.881095
7533	YWHAH	0.191522	0.360264	0.0002	0.00928969	0.881062
401442	LOC401442	0.477175	0.897413	0.0014	0.0366484	0.88068
2688	GH1	0.225848	0.424619	0	0	0.880108
10687	PNMA2	0.401873	0.754878	0.0018	0.0435631	0.878397
94032	CAMK2N2	0.255803	0.48031	0.0046	0.0769358	0.877656
22949	PTGR1	0.304483	0.57164	0.0132	0.139664	0.877409
51634	RBMX2	0.211483	0.396969	0	0	0.877073
55276	PGM2	0.264459	0.49625	0.0002	0.00928969	0.876475
9229	DLGAP1	0.198281	0.371783	0	0	0.87503
55509	BATF3	0.349619	0.65489	0	0	0.873154
4534	MTM1	0.236142	0.441923	0.0002	0.00928969	0.871426
2550	GABBR1	0.131132	0.245274	0.0006	0.0205441	0.870433
1421	CRYGD	0.235763	0.440936	0.0166	0.158174	0.87025
4995	OR3A2	0.251807	0.470868	0.0374	0.240233	0.869961
127933	UHMK1	0.3864	0.720788	0.001	0.0288495	0.865393
90523	MLIP	0.295196	0.550455	0.0046	0.0769358	0.86471
7307	U2AF1	0.190364	0.354847	0.0002	0.00928969	0.86405
81889	FAHD1	0.303713	0.565423	0.0024	0.051974	0.861701
26013	L3MBTL1	0.185567	0.345407	0.0002	0.00928969	0.861354
5563	PRKAA2	0.371694	0.69184	0.0006	0.0205441	0.861315
6605	SMARCE1	0.182597	0.339661	0.0004	0.0154398	0.860172
55471	C2orf56	0.234969	0.436874	0.0016	0.0402413	0.859286
389362	PSMG4	0.305065	0.567144	0.0016	0.0402413	0.859092
10376	TUBA1B	0.161413	0.299804	0.0154	0.150878	0.857375
84815	MGC12916	0.193556	0.359466	0.002	0.0467087	0.857167
9645	MICAL2	0.282098	0.523879	0.0008	0.0250752	0.857084
4033	LRMP	0.445588	0.826446	0	0	0.854732
140679	SLC32A1	0.395487	0.733458	0.001	0.0288495	0.854567
11086	ADAM29	0.125853	0.233396	0.0096	0.117103	0.854514
200942	KLHDC8B	0.237716	0.440553	0.0006	0.0205441	0.853279
6872	TAF1	0.192215	0.356202	0.0002	0.00928969	0.853143
55296	TBC1D19	0.254241	0.470855	0.0006	0.0205441	0.852003
118881	COMTD1	0.258652	0.478887	0	0	0.851468
25932	CLIC4	0.471614	0.872722	0.002	0.0467087	0.8505
4628	MYH10	0.178221	0.329662	0.01	0.119706	0.849744
9786	KIAA0586	0.300851	0.556267	0	0	0.848982
59283	CACNG8	0.265037	0.489749	0.0004	0.0154398	0.847847
151613	TTC14	0.173244	0.320094	0.0024	0.051974	0.847643
5600	MAPK11	0.197585	0.365053	0.001	0.0288495	0.847576
375567	VWC2	0.325551	0.601343	0.0012	0.0331841	0.847155
51022	GLRX2	0.220722	0.407392	0	0	0.845726
79722	ANKRD55	0.416341	0.768388	0.0006	0.0205441	0.845572
91807	MYLK3	0.26534	0.489546	0.0112	0.127656	0.844979
7324	UBE2E1	0.283073	0.522254	0.0002	0.00928969	0.844943
255022	CALHM1	0.266528	0.491484	0.0016	0.0402413	0.844024
54438	GFOD1	0.261561	0.482306	0.0004	0.0154398	0.843948
154092	LOC154092	0.348948	0.643439	0	0	0.84394
81609	SNX27	0.219863	0.404901	0.0008	0.0250752	0.841602
1509	CTSD	0.203823	0.375342	0.0126	0.135814	0.841507
7903	ST8SIA4	0.26122	0.480951	0.0004	0.0154398	0.841175
9159	PCSK7	0.217354	0.39965	0	0	0.838705
8266	UBL4A	0.246027	0.452281	0.003	0.0595536	0.838339
80054	LOC80054	0.224368	0.412278	0	0	0.837508
145581	LRFN5	0.366728	0.673821	0	0	0.837386
51099	ABHD5	0.214833	0.394669	0.007	0.0969477	0.837101
1615	DARS	0.213296	0.391612	0.0004	0.0154398	0.836
349667	RTN4RL2	0.1212	0.222376	0.002	0.0467087	0.834783
23077	MYCBP2	0.369859	0.678566	0	0	0.834661
64386	MMP25	0.172608	0.316558	0	0	0.833966
2040	STOM	0.540596	0.991379	0.0028	0.0567315	0.833862
91151	TIGD7	0.194253	0.355981	0.0028	0.0567315	0.832557
138715	ARID3C	0.242406	0.44421	0.0036	0.0673737	0.8325
199746	U2AF1L4	0.156208	0.286215	0.0002	0.00928969	0.83227
9940	DLEC1	0.19428	0.355919	0.0064	0.0921589	0.831995
27300	ZNF544	0.217062	0.397572	0	0	0.831606
64860	ARMCX5	0.171838	0.314538	0	0	0.830433
8362	HIST1H4K	0.335059	0.613269	0.0006	0.0205441	0.83033
79674	VEPH1	0.478479	0.874838	0.0004	0.0154398	0.828374
80255	SLC35F5	0.259045	0.473284	0	0	0.827035
90342	FER1L5	0.2159	0.394305	0.0014	0.0366484	0.82633
9132	KCNQ4	0.190658	0.348191	0.0088	0.11058	0.826254
65220	NADK	0.180928	0.330346	0.0004	0.0154398	0.825843
84951	TNS4	0.208903	0.381317	0.0002	0.00928969	0.825325
9277	WDR46	0.219485	0.400524	0.0048	0.0790909	0.824833
139599	MAGEE2	0.496963	0.906626	0.0002	0.00928969	0.824332
375196	LOC375196	0.303861	0.554341	0.0018	0.0435631	0.824326
1511	CTSG	0.159134	0.290238	0.0024	0.051974	0.823861
6289	SAA2	0.327499	0.597095	0.002	0.0467087	0.823196
8741	TNFSF13	0.400704	0.729931	0.0008	0.0250752	0.82162
143425	SYT9	0.251594	0.457538	0.0014	0.0366484	0.818555
257194	NEGR1	0.524776	0.954287	0	0	0.818465
220359	TIGD3	0.23717	0.431196	0	0	0.818088
54558	SPATA6	0.222544	0.404601	0.0008	0.0250752	0.818072
8564	KMO	0.429159	0.779918	0.0004	0.0154398	0.817315
4615	MYD88	0.402533	0.731275	0.024	0.19296	0.816681
3381	IBSP	0.223522	0.406023	0.0014	0.0366484	0.816482
51603	METTL13	0.157038	0.285055	0.001	0.0288495	0.815197
348110	C15orf38	0.248221	0.450569	0.0038	0.0695554	0.815195
400322	HERC2P2	0.406724	0.738118	0	0	0.814786
91433	RCCD1	0.198111	0.359419	0.0042	0.0741111	0.814227
5881	RAC3	0.257008	0.466255	0.0004	0.0154398	0.814164
54872	PIGG	0.212388	0.384951	0.005	0.0804778	0.812488
57461	ISY1	0.157923	0.285991	0.007	0.0969477	0.81095
25921	ZDHHC5	0.221018	0.400221	0.0054	0.0838408	0.81081
3636	INPPL1	0.182012	0.329549	0.0012	0.0331841	0.810586
9473	C1orf38	0.342754	0.62058	0	0	0.81057
166785	MMAA	0.25412	0.459819	0.0014	0.0366484	0.809455
114569	MAL2	0.366353	0.662855	0.014	0.144283	0.809332
10015	PDCD6IP	0.218939	0.396111	0.0004	0.0154398	0.809228
5783	PTPN13	0.473216	0.855841	0	0	0.808565
22845	DOLK	0.208602	0.377265	0	0	0.808538
6866	TAC3	0.506525	0.91574	0	0	0.807888
64921	CASD1	0.468969	0.847776	0	0	0.807744
2157	F8	0.0935316	0.169072	0.0064	0.0921589	0.807648
1200	TPP1	0.37637	0.680324	0.0002	0.00928969	0.807594
7225	TRPC6	0.345043	0.623697	0	0	0.807594
9516	LITAF	0.46103	0.83309	0	0	0.807021
9025	RNF8	0.208406	0.376405	0.0006	0.0205441	0.80611
199857	ALG14	0.255938	0.462085	0.0008	0.0250752	0.805452
9421	HAND1	0.197984	0.357444	0.0026	0.0546721	0.805422
8601	RGS20	0.19616	0.353807	0.028	0.20641	0.803666
4914	NTRK1	0.252504	0.454591	0.0084	0.108329	0.80033
6296	ACSM3	0.128992	0.232225	0.0006	0.0205441	0.8003
5108	PCM1	0.167085	0.300799	0.0142	0.144469	0.800274
26548	ITGB1BP2	0.287068	0.516666	0.0026	0.0546721	0.799806
7545	ZIC1	0.440634	0.792726	0.0002	0.00928969	0.799055
847	CAT	0.398719	0.717203	0.0008	0.0250752	0.798769
167691	LCA5	0.238661	0.429198	0.0052	0.0820341	0.798359
57048	PLSCR3	0.26076	0.468878	0	0	0.798123
284408	LOC284408	0.369524	0.664273	0	0	0.797644
10975	UQCR11	0.125675	0.225751	0.0066	0.0932669	0.796302
4061	LY6E	0.320578	0.575793	0.0054	0.0838408	0.796106
4191	MDH2	0.352588	0.632901	0.0016	0.0402413	0.795013
4253	CTAGE5	0.35341	0.634275	0.0008	0.0250752	0.794729
85414	SLC45A3	0.18346	0.329115	0.0148	0.147602	0.793931
8639	AOC3	0.159042	0.285191	0	0	0.79318
6563	SLC14A1	0.8617	1.54285	0.0006	0.0205441	0.790473
352909	C19orf51	0.231117	0.413644	0.0002	0.00928969	0.789756
26297	SERGEF	0.193767	0.346438	0	0	0.787912
4103	MAGEA4	0.28099	0.502049	0	0	0.786715
57105	CYSLTR2	0.183179	0.327104	0	0	0.78571
254272	TBC1D28	0.172973	0.308846	0.0504	0.277092	0.785511
283162	OR8B4	0.259112	0.462505	0.0098	0.118245	0.78496
652	BMP4	0.309539	0.552329	0.0044	0.0751742	0.784358
64145	ZFYVE20	0.323432	0.577015	0	0	0.78404
51129	ANGPTL4	0.437779	0.780991	0	0	0.783984
7113	TMPRSS2	0.146046	0.260526	0	0	0.783869
5423	POLB	0.336172	0.599369	0.0002	0.00928969	0.782926
51094	ADIPOR1	0.173991	0.310208	0.0056	0.0854346	0.78289
6559	SLC12A3	0.156404	0.278742	0.0004	0.0154398	0.782198
168448	CDC14C	0.274255	0.488402	0	0	0.78083
6602	SMARCD1	0.140707	0.250515	0.0144	0.145616	0.780397
85417	CCNB3	0.209182	0.372414	0.0022	0.0495074	0.780335
91754	NEK9	0.227274	0.404508	0.0034	0.0647203	0.779824
89866	SEC16B	0.376026	0.669162	0.004	0.0717204	0.779565
6612	SUMO3	0.19643	0.349533	0.0064	0.0921589	0.779428
81832	NETO1	0.172616	0.307122	0.0084	0.108329	0.779217
80781	COL18A1	0.209492	0.372683	0.0046	0.0769358	0.778982
26973	CHORDC1	0.372973	0.663386	0	0	0.778644
891	CCNB1	0.298214	0.530378	0.005	0.0804778	0.778516
6940	ZNF354A	0.211826	0.376662	0.0004	0.0154398	0.778169
9880	ZBTB39	0.232964	0.414083	0.0014	0.0366484	0.77746
10474	TADA3	0.200526	0.356339	0.0014	0.0366484	0.777019
399512	SLC25A35	0.343344	0.610009	0.006	0.0892507	0.776672
27065	D4S234E	0.226683	0.402718	0	0	0.776575
80059	LRRTM4	0.327373	0.581569	0.0038	0.0695554	0.776471
114294	LACTB	0.215731	0.383041	0	0	0.775548
8578	SCARF1	0.18225	0.323545	0	0	0.775282
280636	C11orf31	0.236103	0.419136	0.0008	0.0250752	0.775226
26137	ZBTB20	0.299447	0.531415	0.0016	0.0402413	0.774651
81618	ITM2C	0.331198	0.587251	0.0122	0.133751	0.773109
1678	TIMM8A	0.196103	0.347692	0.0008	0.0250752	0.773007
80022	MYO15B	0.146341	0.259421	0.033	0.226544	0.772718
6165	RPL35A	0.166427	0.294922	0	0	0.772086
81628	TSC22D4	0.448508	0.794716	0.0006	0.0205441	0.771911
51304	ZDHHC3	0.165568	0.293363	0.0012	0.0331841	0.771853
1441	CSF3R	0.304538	0.539346	0.0082	0.106658	0.771031
55805	LRP2BP	0.305473	0.540976	0.0314	0.220461	0.770948
6461	SHB	0.180443	0.319466	0.0258	0.198439	0.770448
126123	IZUMO2	0.225986	0.399736	0.008	0.104874	0.768853
7873	MANF	0.306453	0.541964	0.0008	0.0250752	0.768504
2528	FUT6	0.227293	0.401948	0.0016	0.0402413	0.768417
84517	ARPM1	0.285043	0.50404	0.0118	0.13188	0.768298
115827	RAB3C	0.366965	0.648868	0.0072	0.0988148	0.768204
23478	SEC11A	0.271084	0.479272	0.0006	0.0205441	0.767984
80086	TUBA4B	0.179012	0.31648	0.0004	0.0154398	0.767926
115196	ZNF554	0.259887	0.45944	0.0004	0.0154398	0.767845
51285	RASL12	0.415872	0.735162	0.0234	0.189599	0.767759
9311	ACCN3	0.179789	0.317654	0.0036	0.0673737	0.766811
406896	MIR103A2	0.326415	0.576415	0.01	0.119706	0.765897
54413	NLGN3	0.252943	0.446631	0.0012	0.0331841	0.765733
284459	HKR1	0.187147	0.330365	0.0168	0.15908	0.765269
146057	TTBK2	0.427683	0.754913	0.013	0.138958	0.765124
3832	KIF11	0.209022	0.368923	0.0308	0.217992	0.765001
1362	CPD	0.276825	0.488588	0.0028	0.0567315	0.76497
79953	SYNDIG1	0.238895	0.421474	0.0052	0.0820341	0.764266
6954	TCP11	0.331313	0.58447	0.0028	0.0567315	0.764102
10059	DNM1L	0.172272	0.303737	0	0	0.763126
254531	LPCAT4	0.295826	0.521444	0.0018	0.0435631	0.762671
55160	ARHGEF10L	0.177099	0.312128	0.0044	0.0751742	0.762454
257407	C2orf72	0.272674	0.480402	0.002	0.0467087	0.761821
10392	NOD1	0.233127	0.410681	0.0044	0.0751742	0.761616
85569	GALP	0.247161	0.434949	0.0022	0.0495074	0.759784
8409	UXT	0.166324	0.292542	0.0012	0.0331841	0.758874
3241	HPCAL1	0.19546	0.343745	0.0006	0.0205441	0.758649
10782	ZNF274	0.301058	0.529429	0	0	0.75856
84722	PSRC1	0.286749	0.504125	0.0058	0.0872092	0.758072
26083	TBC1D29	0.134763	0.236901	0.0176	0.162773	0.757911
4795	NFKBIL1	0.19632	0.344734	0.0066	0.0932669	0.755976
146845	WDR16	0.41237	0.723709	0	0	0.755
200132	TCTEX1D1	0.342375	0.600859	0.0076	0.101465	0.754972
100505906	LOC100505906	0.215569	0.378231	0	0	0.754572
55093	WDYHV1	0.273328	0.479557	0.0008	0.0250752	0.754514
79050	NOC4L	0.189609	0.332671	0.0088	0.11058	0.754509
340441	POTEA	0.283796	0.497691	0.011	0.126152	0.753692
26608	TBL2	0.201945	0.354098	0	0	0.753436
6487	ST3GAL3	0.373248	0.65432	0.0012	0.0331841	0.753043
9655	SOCS5	0.114119	0.200054	0.0004	0.0154398	0.75303
254778	C8orf46	0.259774	0.455344	0.0004	0.0154398	0.752847
397	ARHGDIB	0.347839	0.60934	0.0034	0.0647203	0.751787
1497	CTNS	0.355401	0.622491	0.0084	0.108329	0.751515
80762	NDFIP1	0.281081	0.492305	0.0002	0.00928969	0.751468
55858	TMEM165	0.386633	0.67715	0	0	0.751403
23126	POGZ	0.193309	0.338472	0.0008	0.0250752	0.750939
51306	FAM13B	0.365016	0.638506	0.0004	0.0154398	0.749254
55577	NAGK	0.175461	0.306626	0.0012	0.0331841	0.74755
57414	RHBDD2	0.270916	0.473279	0.0022	0.0495074	0.74696
2932	GSK3B	0.215253	0.375792	0.0034	0.0647203	0.745816
6453	ITSN1	0.213026	0.371839	0.0004	0.0154398	0.745506
10168	ZNF197	0.212414	0.37072	0.025	0.195992	0.745269
9123	SLC16A3	0.449093	0.783762	0	0	0.74521
152404	IGSF11	0.353857	0.617239	0.008	0.104874	0.744318
100287428	PNMA6C	0.215087	0.374976	0.005	0.0804778	0.743372
170371	C10orf128	0.270211	0.470852	0	0	0.742533
64599	GIGYF1	0.283735	0.493738	0	0	0.740136
5083	PAX9	0.1647	0.286587	0.0002	0.00928969	0.740053
1347	COX7A2	0.192314	0.334363	0.001	0.0288495	0.738633
9913	SUPT7L	0.148353	0.257885	0.0088	0.11058	0.738323
284323	ZNF780A	0.323048	0.561505	0.0004	0.0154398	0.738145
9899	SV2B	0.204848	0.355863	0.0128	0.137526	0.7372
285224	DNAJB8-AS1	0.233568	0.405668	0	0	0.736832
23411	SIRT1	0.28316	0.491791	0.0004	0.0154398	0.736798
4678	NASP	0.233761	0.405473	0.0008	0.0250752	0.73456
8396	PIP4K2B	0.134716	0.233645	0.0012	0.0331841	0.734345
282679	AQP11	0.326262	0.565678	0	0	0.733816
6447	SCG5	0.248925	0.431539	0.001	0.0288495	0.733611
128977	C22orf39	0.255589	0.44303	0.0182	0.165207	0.733365
54926	UBE2R2	0.258858	0.448645	0.0014	0.0366484	0.733171
55916	NXT2	0.330486	0.572585	0	0	0.732553
90673	PPP1R3E	0.194152	0.336279	0.0006	0.0205441	0.732034
390594	KBTBD13	0.176736	0.306089	0.0122	0.133751	0.731895
388849	LOC388849	0.210127	0.363863	0.0086	0.109805	0.731629
100507474	LOC100507474	0.189615	0.328258	0.0292	0.211149	0.731185
5267	SERPINA4	0.238421	0.412705	0.0096	0.117103	0.730991
5549	PRELP	0.269206	0.46591	0.0018	0.0435631	0.730686
285679	C5orf60	0.222751	0.385245	0.0056	0.0854346	0.729491
93611	FBXO44	0.162344	0.280758	0.0026	0.0546721	0.729402
55140	ELP3	0.211924	0.366489	0.0006	0.0205441	0.729344
100653074	LOC100653074	0.186121	0.321777	0.0074	0.100077	0.72886
6991	TCTE3	0.23103	0.399281	0.0068	0.0951258	0.728263
55088	C10orf118	0.187808	0.324572	0.003	0.0595536	0.728208
7278	TUBA3C	0.129288	0.223366	0.0164	0.157076	0.727668
55589	BMP2K	0.217067	0.374957	0.0056	0.0854346	0.727382
3426	CFI	0.490086	0.846559	0.0006	0.0205441	0.727368
23623	RUSC1	0.216796	0.374475	0.0004	0.0154398	0.727321
4689	NCF4	0.367765	0.63459	0.0136	0.142271	0.725532
117289	TAGAP	0.271539	0.468497	0	0	0.725341
407040	MIR34A	0.264663	0.456622	0.0078	0.103144	0.725291
100271715	ARHGEF33	0.254373	0.438862	0.005	0.0804778	0.72527
2568	GABRP	0.178811	0.308226	0.0016	0.0402413	0.723756
3600	IL15	0.218911	0.377343	0.0008	0.0250752	0.723725
144486	LOC144486	0.244682	0.421748	0	0	0.72366
284992	CCDC150	0.349537	0.602482	0.0074	0.100077	0.723655
6510	SLC1A5	0.217477	0.374809	0.007	0.0969477	0.723447
161835	FSIP1	0.386498	0.666081	0.0308	0.217992	0.723375
51016	FAM158A	0.241036	0.415057	0	0	0.721972
8893	EIF2B5	0.193224	0.33272	0	0	0.721939
10633	RASL10A	0.275482	0.474322	0	0	0.721791
10479	SLC9A6	0.240492	0.413935	0.0002	0.00928969	0.721198
124751	KRBA2	0.282458	0.48613	0	0	0.721072
6323	SCN1A	0.370617	0.63753	0	0	0.720187
55665	URGCP	0.268087	0.461152	0.0546	0.287936	0.720161
23072	HECW1	0.441761	0.759484	0.0006	0.0205441	0.71922
26659	OR7A5	0.296888	0.510404	0.0006	0.0205441	0.719181
79317	OR4K5	0.249362	0.42837	0.0006	0.0205441	0.717861
26528	DAZAP1	0.206968	0.35554	0.02	0.172977	0.717852
154791	C7orf55	0.235699	0.404739	0.0076	0.101465	0.717183
84333	PCGF5	0.223025	0.382933	0.0182	0.165207	0.716998
219738	C10orf35	0.2962	0.508536	0.0018	0.0435631	0.716867
27166	PRELID1	0.148371	0.254653	0	0	0.716325
10957	PNRC1	0.337912	0.579821	0.0024	0.051974	0.715893
84541	KBTBD8	0.2987	0.512311	0.0004	0.0154398	0.715137
56953	NT5M	0.141522	0.242702	0.0096	0.117103	0.71494
10473	HMGN4	0.209026	0.358458	0	0	0.714903
115	ADCY9	0.227532	0.390049	0.0004	0.0154398	0.714257
202299	C5orf27	0.346954	0.594106	0.0002	0.00928969	0.71235
1796	DOK1	0.145153	0.248527	0.012	0.133045	0.712176
27257	LSM1	0.189599	0.324589	0	0	0.711977
55037	PTCD3	0.122784	0.210191	0.0132	0.139664	0.711879
3682	ITGAE	0.182544	0.312434	0.003	0.0595536	0.711553
692157	SNORA16B	0.288423	0.493487	0.0054	0.0838408	0.710981
195977	ANTXRL	0.190307	0.325534	0.0182	0.165207	0.710576
10326	SIRPB1	0.184019	0.314664	0.0008	0.0250752	0.709956
2736	GLI2	0.33023	0.564538	0.0106	0.123519	0.709527
5145	PDE6A	0.289131	0.494122	0.0222	0.183897	0.708991
25936	NSL1	0.282799	0.483219	0.0008	0.0250752	0.7087
26985	AP3M1	0.246726	0.421539	0.0024	0.051974	0.708531
27429	HTRA2	0.18603	0.317738	0.0056	0.0854346	0.707992
23467	NPTXR	0.338837	0.578699	0.0026	0.0546721	0.707897
30819	KCNIP2	0.238618	0.407524	0.006	0.0892507	0.707847
6227	RPS21	0.149443	0.255176	0.0092	0.11389	0.707516
137075	CLDN23	0.415424	0.709244	0.005	0.0804778	0.707275
10307	APBB3	0.290551	0.496004	0.003	0.0595536	0.707117
6854	SYN2	0.251519	0.429338	0	0	0.706984
85403	EAF1	0.230219	0.392914	0.001	0.0288495	0.706697
55109	AGGF1	0.320846	0.547505	0.0192	0.169846	0.706441
84684	INSM2	0.445875	0.76084	0.0024	0.051974	0.706398
57084	SLC17A6	0.520756	0.887913	0	0	0.705045
1936	EEF1D	0.236812	0.403703	0.0452	0.263535	0.704741
57172	CAMK1G	0.303872	0.51724	0.0006	0.0205441	0.702167
27235	COQ2	0.137005	0.233032	0.0292	0.211149	0.700904
55329	MNS1	0.28684	0.487857	0.0032	0.0624094	0.7008
90826	PRMT10	0.161286	0.274289	0.0088	0.11058	0.700642
84303	CHCHD6	0.300462	0.510915	0.0004	0.0154398	0.700433
55151	TMEM38B	0.347536	0.590777	0.001	0.0288495	0.699904
10123	ARL4C	0.238149	0.404574	0.0196	0.171205	0.698829
2057	EPOR	0.250823	0.426078	0.0124	0.134879	0.698717
29086	BABAM1	0.212424	0.360754	0.0034	0.0647203	0.69827
1351	COX8A	0.180606	0.3067	0.0636	0.310278	0.698178
79035	OBFC2B	0.157687	0.267726	0	0	0.697828
124961	ZFP3	0.349075	0.592602	0	0	0.697636
5631	PRPS1	0.239711	0.406941	0	0	0.697632
347746	PAR-SN	0.488125	0.828355	0	0	0.697013
401303	ZNF815	0.239704	0.40659	0.0116	0.130784	0.696215
3688	ITGB1	0.239865	0.406731	0.0014	0.0366484	0.695663
523	ATP6V1A	0.240697	0.40799	0.0214	0.180498	0.695038
10682	EBP	0.210428	0.35668	0	0	0.695024
131377	KBTBD5	0.231299	0.392003	0.008	0.104874	0.69479
7874	USP7	0.169766	0.287649	0.0022	0.0495074	0.694388
339290	LOC339290	0.374271	0.633975	0.0108	0.125062	0.69389
171024	SYNPO2	0.266605	0.451533	0.0062	0.090848	0.69364
2888	GRB14	0.379888	0.643255	0	0	0.693274
692072	SNORD5	0.297614	0.503907	0.021	0.178843	0.693153
100526767	RNF103-CHMP3	0.226881	0.383964	0.005	0.0804778	0.692354
1397	CRIP2	0.23969	0.405501	0.0004	0.0154398	0.691773
11159	RABL2A	0.203968	0.345031	0	0	0.691589
54886	LPPR1	0.281691	0.476416	0	0	0.691271
10100	TSPAN2	0.317411	0.536578	0.0352	0.233477	0.690483
11191	PTENP1	0.277614	0.46918	0.0044	0.0751742	0.690042
340061	TMEM173	0.260742	0.440634	0.0056	0.0854346	0.689921
8406	SRPX	0.486175	0.820997	0.0002	0.00928969	0.688684
115123	2018-03-03	0.259231	0.437714	0.0126	0.135814	0.688508
440854	CAPN14	0.269184	0.454203	0.0018	0.0435631	0.687333
1393	CRHBP	0.450787	0.760597	0.0078	0.103144	0.687267
389	RHOC	0.342353	0.577527	0	0	0.686937
2735	GLI1	0.215975	0.364046	0.0002	0.00928969	0.685594
79628	SH3TC2	0.21717	0.366056	0.0002	0.00928969	0.685574
130814	PQLC3	0.198197	0.333935	0.0082	0.106658	0.684859
11075	STMN2	0.106137	0.178767	0.0104	0.122819	0.684302
79990	PLEKHH3	0.223327	0.376003	0.0042	0.0741111	0.683641
284023	LOC284023	0.271499	0.457093	0.0014	0.0366484	0.683589
4621	MYH3	0.31735	0.534071	0.0106	0.123519	0.682908
221400	TDRD6	0.327442	0.550846	0.0034	0.0647203	0.682274
23530	NNT	0.124971	0.210211	0.0032	0.0624094	0.682086
89796	NAV1	0.1359	0.228567	0.011	0.126152	0.68187
4288	MKI67	0.300528	0.505336	0.0158	0.153356	0.681495
11223	MST1P9	0.247909	0.416699	0.027	0.203262	0.680854
10928	RALBP1	0.32919	0.552575	0.02	0.172977	0.678586
692227	SNORD104	0.265428	0.445413	0.0504	0.277092	0.678096
202500	TCTE1	0.184663	0.309857	0.0142	0.144469	0.677956
65057	ACD	0.187228	0.314157	0.0072	0.0988148	0.677936
158326	FREM1	0.234998	0.394022	0.0014	0.0366484	0.676702
3746	KCNC1	0.344844	0.578164	0.0052	0.0820341	0.676596
23414	ZFPM2	0.268742	0.450405	0.0106	0.123519	0.675979
115399	LRRC56	0.266548	0.446695	0.0016	0.0402413	0.675854
23335	WDR7	0.177945	0.298203	0.0234	0.189599	0.675812
23390	ZDHHC17	0.275626	0.461895	0.0004	0.0154398	0.675806
3660	IRF2	0.31876	0.53414	0.0004	0.0154398	0.675685
5333	PLCD1	0.330009	0.552986	0.0006	0.0205441	0.67567
115286	SLC25A26	0.326167	0.546429	0.0054	0.0838408	0.675305
2050	EPHB4	0.289805	0.485409	0	0	0.674947
164781	WDR69	0.479078	0.802166	0.0026	0.0546721	0.674395
151354	FAM84A	0.331033	0.554036	0.0074	0.100077	0.673658
5051	PAFAH2	0.197147	0.329903	0.0038	0.0695554	0.673391
4849	CNOT3	0.222098	0.371589	0.0088	0.11058	0.673084
143	PARP4	0.32475	0.543281	0.0098	0.118245	0.672921
23314	SATB2	0.379586	0.635003	0.0056	0.0854346	0.672886
25807	RHBDD3	0.187251	0.313101	0.0016	0.0402413	0.672089
7988	ZNF212	0.175548	0.293518	0.0002	0.00928969	0.67201
11260	XPOT	0.196684	0.328851	0.0068	0.0951258	0.671977
525	ATP6V1B1	0.198876	0.332448	0.0142	0.144469	0.671633
139221	MUM1L1	0.418231	0.698884	0.0164	0.157076	0.671045
5346	PLIN1	0.300472	0.502086	0.001	0.0288495	0.670989
10628	TXNIP	0.600611	1.00339	0.0026	0.0546721	0.670619
3727	JUND	0.320424	0.535007	0.0028	0.0567315	0.669683
10712	FAM189B	0.128841	0.215057	0.0072	0.0988148	0.66917
55063	ZCWPW1	0.239062	0.399004	0.0004	0.0154398	0.669037
54497	HEATR5B	0.182591	0.304617	0.0098	0.118245	0.668303
4774	NFIA	0.254937	0.425029	0.0058	0.0872092	0.667192
7276	TTR	0.527583	0.879561	0.001	0.0288495	0.667153
132299	OCIAD2	0.214293	0.357206	0.003	0.0595536	0.6669
956	ENTPD3	0.219175	0.365337	0.0044	0.0751742	0.66687
9330	GTF3C3	0.168852	0.281421	0.005	0.0804778	0.666671
65055	REEP1	0.318291	0.530346	0.0052	0.0820341	0.666229
84881	RPUSD4	0.261056	0.434898	0.0002	0.00928969	0.66592
11149	BVES	0.136437	0.227263	0.0002	0.00928969	0.665701
8242	KDM5C	0.223682	0.372537	0.0024	0.051974	0.665471
221060	C10orf111	0.2968	0.494238	0.012	0.133045	0.665226
79157	MFSD11	0.314871	0.524244	0.0144	0.145616	0.664951
79762	C1orf115	0.312725	0.520666	0.0052	0.0820341	0.664929
10898	CPSF4	0.211337	0.351846	0.0052	0.0820341	0.664859
81555	YIPF5	0.27807	0.462842	0.0264	0.201014	0.66448
92922	CCDC102A	0.212425	0.353518	0.0172	0.16131	0.664203
284578	LOC284578	0.338482	0.563055	0.04	0.248232	0.663473
55187	VPS13D	0.224639	0.37364	0.0076	0.101465	0.663293
23341	DNAJC16	0.144348	0.240089	0.0118	0.13188	0.663256
81606	LBH	0.35246	0.586171	0.0294	0.21186	0.663084
9459	ARHGEF6	0.306616	0.50984	0.0002	0.00928969	0.662795
29958	DMGDH	0.247966	0.412217	0.0082	0.106658	0.662391
10777	ARPP21	0.210761	0.350253	0.0046	0.0769358	0.661852
84171	LOXL4	0.398494	0.662079	0.0078	0.103144	0.661451
1992	SERPINB1	0.626692	1.04106	0.0006	0.0205441	0.661191
784	CACNB3	0.235866	0.391592	0.009	0.112164	0.660229
135927	C7orf34	0.202592	0.336317	0.0038	0.0695554	0.660068
54620	FBXL19	0.280865	0.466158	0.0702	0.325434	0.659725
8091	HMGA2	0.394599	0.654844	0.005	0.0804778	0.659517
26103	LRIT1	0.263678	0.437343	0.0064	0.0921589	0.658627
57542	KLHDC5	0.343377	0.569329	0.0342	0.230046	0.658031
26471	NUPR1	0.459874	0.762213	0.0378	0.241223	0.657438
477	ATP1A2	0.390691	0.64742	0.0026	0.0546721	0.657117
527	ATP6V0C	0.435358	0.721346	0.007	0.0969477	0.656904
5479	PPIB	0.294764	0.488366	0.0052	0.0820341	0.656802
8841	HDAC3	0.139339	0.230846	0.001	0.0288495	0.65672
51308	REEP2	0.25427	0.421154	0.0006	0.0205441	0.656327
259287	TAS2R41	0.299833	0.496411	0.0018	0.0435631	0.655623
84939	MUM1	0.237322	0.392878	0.0132	0.139664	0.655466
81926	FAM108A1	0.177648	0.294062	0.0046	0.0769358	0.655301
158035	LINC00032	0.314449	0.520436	0.041	0.250706	0.655069
221322	C6orf170	0.278854	0.461516	0.0144	0.145616	0.655048
26039	SS18L1	0.251209	0.415569	0.0074	0.100077	0.654271
4753	NELL2	0.394846	0.653101	0.0032	0.0624094	0.654065
149775	GNAS-AS1	0.209472	0.346446	0.002	0.0467087	0.653896
91039	DPP9	0.141111	0.233362	0.0258	0.198439	0.653742
831	CAST	0.268398	0.443825	0.0048	0.0790909	0.653606
1503	CTPS	0.232048	0.383688	0.0004	0.0154398	0.653488
285189	PLGLA	0.359769	0.594645	0.0394	0.247176	0.65285
8735	MYH13	0.218784	0.361612	0.0024	0.051974	0.652826
4207	MEF2BNB-MEF2B	0.168193	0.277921	0.0006	0.0205441	0.652395
134359	POC5	0.230733	0.381057	0.0124	0.134879	0.651505
5992	RFX4	0.287111	0.474125	0.0366	0.237473	0.651367
5900	RALGDS	0.285452	0.47135	0.0008	0.0250752	0.651238
9918	NCAPD2	0.40758	0.672902	0.0038	0.0695554	0.650971
6284	S100A13	0.443963	0.732871	0.0006	0.0205441	0.650746
25787	DGCR9	0.341559	0.563821	0.0048	0.0790909	0.650726
5521	PPP2R2B	0.243961	0.402663	0.0002	0.00928969	0.650523
163782	KANK4	0.535134	0.883052	0.001	0.0288495	0.650152
54704	PDP1	0.270116	0.445714	0.0098	0.118245	0.650083
652965	SNORA48	0.231129	0.381169	0.014	0.144283	0.649161
1618	DAZL	0.195787	0.322831	0.0018	0.0435631	0.648894
79723	SUV39H2	0.170123	0.280463	0.0088	0.11058	0.648583
9470	EIF4E2	0.480489	0.791992	0.0336	0.228313	0.648305
91869	RFT1	0.179911	0.296454	0.0058	0.0872092	0.647785
922	CD5L	0.191464	0.315429	0.0068	0.0951258	0.647456
79955	PDZD7	0.343507	0.56575	0.0026	0.0546721	0.646983
10136	CELA3A	0.158852	0.261591	0.005	0.0804778	0.64676
162962	ZNF836	0.261199	0.430113	0.0472	0.268713	0.646688
1409	CRYAA	0.266797	0.439277	0.0022	0.0495074	0.646482
54414	SIAE	0.201028	0.330822	0.0058	0.0872092	0.645656
27101	CACYBP	0.266057	0.437824	0.0026	0.0546721	0.645605
147798	TMC4	0.157982	0.259872	0.0398	0.247914	0.644948
4780	NFE2L2	0.409914	0.674247	0.0006	0.0205441	0.64485
57572	DOCK6	0.170254	0.279951	0.0094	0.115508	0.644308
1512	CTSH	0.333711	0.548717	0.0078	0.103144	0.64429
4998	ORC1	0.310125	0.509808	0.0136	0.142271	0.643881
7325	UBE2E2	0.271155	0.445715	0.0046	0.0769358	0.643763
114884	OSBPL10	0.279595	0.459554	0.0002	0.00928969	0.643641
8048	CSRP3	0.198075	0.325556	0.0242	0.193264	0.643599
166348	KBTBD12	0.213749	0.351301	0.0058	0.0872092	0.643527
5919	RARRES2	0.300374	0.493545	0.0024	0.051974	0.643103
221545	C6orf136	0.239965	0.394255	0.0002	0.00928969	0.642971
23336	SYNM	0.261127	0.428995	0.0012	0.0331841	0.642859
113251	LARP4	0.253841	0.416997	0.0124	0.134879	0.642747
391	RHOG	0.465912	0.765266	0.0016	0.0402413	0.642512
85452	KIAA1751	0.239936	0.394067	0.0008	0.0250752	0.642388
5465	PPARA	0.177126	0.290864	0.0074	0.100077	0.642129
10400	PEMT	0.176173	0.289225	0.0276	0.20482	0.641707
9180	OSMR	0.17691	0.290432	0.001	0.0288495	0.641693
8364	HIST1H4C	0.191843	0.314927	0.0796	0.34494	0.641584
65243	ZNF643	0.270224	0.443587	0.004	0.0717204	0.641553
51295	ECSIT	0.149667	0.245497	0.0226	0.186009	0.640287
4881	NPR1	0.180371	0.295804	0.0004	0.0154398	0.639973
155054	ZNF425	0.244131	0.400352	0.0536	0.285097	0.639908
8405	SPOP	0.154044	0.252615	0.0182	0.165207	0.63989
1356	CP	0.66031	1.08271	0.035	0.23252	0.639695
3741	KCNA5	0.262071	0.429689	0.0202	0.173537	0.639587
7764	ZNF217	0.372514	0.610688	0.0002	0.00928969	0.639369
283403	LOC283403	0.215935	0.353941	0.0118	0.13188	0.63911
8732	RNGTT	0.199252	0.326535	0.013	0.138958	0.638804
174	AFP	0.29473	0.482752	0.0018	0.0435631	0.637948
195827	C9orf21	0.143096	0.234302	0.0032	0.0624094	0.637379
2661	GDF9	0.202877	0.332161	0.0102	0.12123	0.637252
80162	ATHL1	0.339261	0.555311	0.0044	0.0751742	0.636825
163720	CYP4Z2P	0.281735	0.461072	0.0212	0.179903	0.636546
4798	NFRKB	0.244456	0.399878	0.001	0.0288495	0.635786
100130301	LOC100130301	0.223118	0.36496	0.0284	0.207888	0.63573
10973	ASCC3	0.248153	0.405877	0.0132	0.139664	0.63559
55229	PANK4	0.252774	0.413416	0.0076	0.101465	0.635519
54741	LEPROT	0.428634	0.701024	0.0146	0.146748	0.635486
25804	LSM4	0.180333	0.294922	0.0106	0.123519	0.635426
963	CD53	0.480619	0.785691	0.0198	0.17214	0.634747
166614	DCLK2	0.179119	0.292799	0.0006	0.0205441	0.634665
345456	PFN3	0.207792	0.339622	0.005	0.0804778	0.634431
347732	CATSPER3	0.382612	0.625263	0.0004	0.0154398	0.634195
8291	DYSF	0.250295	0.408934	0.0332	0.227075	0.633806
9087	TMSB4Y	0.236066	0.385591	0.0028	0.0567315	0.633403
482	ATP1B2	0.56784	0.927041	0.0064	0.0921589	0.632573
57407	NMRAL1	0.372974	0.608887	0	0	0.632518
55211	DPPA4	0.273315	0.44607	0.0004	0.0154398	0.632073
619383	SCARNA9	0.369833	0.603529	0.0108	0.125062	0.631897
84720	PIGO	0.151763	0.247597	0.0112	0.127656	0.631469
80235	PIGZ	0.311781	0.50852	0.0062	0.090848	0.631019
7067	THRA	0.202671	0.330549	0.013	0.138958	0.630964
4018	LPA	0.314762	0.512963	0.0002	0.00928969	0.629684
5947	RBP1	0.45021	0.733611	0.0274	0.20461	0.629485
51	ACOX1	0.227714	0.37103	0	0	0.629368
60672	MIIP	0.10585	0.172428	0.015	0.148884	0.628988
245936	DEFB123	0.454385	0.740074	0.0082	0.106658	0.628739
23607	CD2AP	0.178276	0.290279	0.0042	0.0741111	0.628258
6041	RNASEL	0.24149	0.393164	0.003	0.0595536	0.628078
114804	RNF157	0.274199	0.446372	0.001	0.0288495	0.627911
1112	FOXN3	0.19117	0.311111	0.0074	0.100077	0.627403
51427	ZNF107	0.46085	0.749831	0.0334	0.227603	0.627062
146923	RUNDC1	0.265772	0.432335	0.0058	0.0872092	0.626711
162417	NAGS	0.263942	0.429239	0.021	0.178843	0.626261
23067	SETD1B	0.230401	0.374522	0.0106	0.123519	0.625523
23281	MTUS2	0.260962	0.424135	0.004	0.0717204	0.625277
56113	PCDHGA2	0.234603	0.381234	0.052	0.281435	0.625018
1666	DECR1	0.319529	0.519182	0.0016	0.0402413	0.624838
23616	SH3BP1	0.176921	0.287466	0.0698	0.324844	0.624829
79258	MMEL1	0.159949	0.259806	0.0076	0.101465	0.62431
22919	MAPRE1	0.276826	0.449527	0.0332	0.227075	0.623858
9028	RHBDL1	0.164246	0.266681	0.0214	0.180498	0.623663
375323	LHFPL4	0.222555	0.361285	0.022	0.183517	0.623348
388910	LINC00207	0.227852	0.369771	0.0002	0.00928969	0.622852
1815	DRD4	0.2747	0.445702	0.0106	0.123519	0.622505
50674	NEUROG3	0.286453	0.464704	0.0198	0.17214	0.622266
80305	TRABD	0.12388	0.200962	0.011	0.126152	0.622229
221421	RSPH9	0.386287	0.626643	0.0006	0.0205441	0.62222
22987	SV2C	0.421834	0.684262	0.0372	0.239409	0.622113
4973	OLR1	0.501091	0.812787	0.0022	0.0495074	0.622034
4542	MYO1F	0.316491	0.51332	0.0074	0.100077	0.621908
5528	PPP2R5D	0.270799	0.439035	0.0004	0.0154398	0.621258
1979	EIF4EBP2	0.192879	0.312685	0.0468	0.267991	0.621149
54874	FNBP1L	0.199746	0.323785	0.0218	0.182671	0.620983
116068	LYSMD3	0.253743	0.411312	0.0132	0.139664	0.620975
83660	TLN2	0.239228	0.387743	0.0134	0.140975	0.620809
9647	PPM1F	0.203275	0.329384	0.0074	0.100077	0.620386
10058	ABCB6	0.173866	0.281719	0.011	0.126152	0.620317
8241	RBM10	0.138765	0.22483	0.0434	0.258094	0.620226
130576	LYPD6B	0.29051	0.470675	0.0084	0.108329	0.620169
79908	BTNL8	0.161113	0.260966	0.007	0.0969477	0.619768
53828	FXYD4	0.26372	0.427097	0.019	0.168883	0.61951
114044	MCM3AP-AS1	0.346425	0.560967	0.0024	0.051974	0.619303
23383	MAU2	0.168448	0.272765	0.0032	0.0624094	0.61928
4801	NFYB	0.196345	0.317924	0.0114	0.129228	0.619207
1994	ELAVL1	0.17391	0.281592	0.0122	0.133751	0.619175
81789	TIGD6	0.342968	0.555269	0.0008	0.0250752	0.619013
8536	CAMK1	0.282835	0.457784	0.0318	0.222147	0.618557
83401	ELOVL3	0.306761	0.496466	0.0046	0.0769358	0.618412
9919	SEC16A	0.20945	0.338814	0.0052	0.0820341	0.617636
2958	GTF2A2	0.157727	0.255121	0.023	0.187818	0.617487
87769	A2LD1	0.251537	0.406678	0.0438	0.259547	0.616772
5360	PLTP	0.456456	0.73797	0.0176	0.162773	0.616738
339105	PRSS53	0.252532	0.408149	0.0026	0.0546721	0.616229
9414	TJP2	0.172264	0.278399	0	0	0.616119
55924	FAM212B	0.205816	0.332484	0.0062	0.090848	0.615446
6610	SMPD2	0.179116	0.2893	0.0144	0.145616	0.615155
374969	CCDC23	0.229604	0.37081	0.004	0.0717204	0.614998
4692	NDN	0.316496	0.511049	0.0034	0.0647203	0.614707
58485	TRAPPC1	0.25542	0.412406	0.014	0.144283	0.614623
64285	RHBDF1	0.253345	0.409003	0.0044	0.0751742	0.614409
121551	BTBD11	0.246787	0.398375	0	0	0.614247
114885	OSBPL11	0.324152	0.523166	0.0152	0.149799	0.613954
55167	MSL2	0.230855	0.372293	0.0436	0.25873	0.612668
11237	RNF24	0.257878	0.415835	0.0298	0.213451	0.612526
79746	ECHDC3	0.347783	0.560772	0.0018	0.0435631	0.612419
55450	CAMK2N1	0.252511	0.407077	0.002	0.0467087	0.612115
3843	IPO5	0.151336	0.24394	0.0488	0.273159	0.611902
442319	ZNF727	0.261474	0.421334	0.0262	0.200314	0.611382
10749	KIF1C	0.202943	0.326924	0.0018	0.0435631	0.610916
6491	STIL	0.231964	0.373552	0.032	0.222612	0.610388
677806	SNORA20	0.337766	0.54385	0.0022	0.0495074	0.610139
6293	VPS52	0.143556	0.231138	0.0124	0.134879	0.61009
26255	PTTG3P	0.248804	0.400573	0.0026	0.0546721	0.609992
51310	SLC22A17	0.190535	0.306743	0.0134	0.140975	0.609905
200894	ARL13B	0.237998	0.383124	0.0004	0.0154398	0.609775
501	ALDH7A1	0.317668	0.511353	0.0758	0.337327	0.609709
7060	THBS4	0.364454	0.586608	0.012	0.133045	0.609551
23471	TRAM1	0.30766	0.495187	0.0034	0.0647203	0.609525
9481	SLC25A27	0.320227	0.515345	0.0476	0.269793	0.609311
7432	VIP	0.518232	0.833645	0.007	0.0969477	0.608634
222161	DKFZP586I1420	0.243426	0.391579	0.075	0.335828	0.608616
56478	EIF4ENIF1	0.189077	0.304125	0.0524	0.282408	0.608469
56104	PCDHGB1	0.174507	0.280686	0.0064	0.0921589	0.60845
94161	SNORD46	0.206664	0.332362	0.0142	0.144469	0.608223
4125	MAN2B1	0.281145	0.452073	0.0058	0.0872092	0.607975
83886	PRSS27	0.203692	0.327383	0.0132	0.139664	0.607243
64231	MS4A6A	0.368936	0.592963	0.0086	0.109805	0.607223
80380	PDCD1LG2	0.145382	0.233621	0.0242	0.193264	0.606949
64130	LIN7B	0.236558	0.380036	0.0012	0.0331841	0.606525
2072	ERCC4	0.224357	0.360375	0.0076	0.101465	0.606256
84293	C10orf58	0.227222	0.364967	0.0144	0.145616	0.606215
57171	DOLPP1	0.160907	0.25845	0.001	0.0288495	0.60621
10346	TRIM22	0.356434	0.572328	0.0376	0.240961	0.605704
79621	RNASEH2B	0.346409	0.555943	0.0166	0.158174	0.604874
221468	TMEM217	0.245804	0.394479	0.0188	0.167731	0.60485
51263	MRPL30	0.194694	0.312453	0.0088	0.11058	0.604838
27034	ACAD8	0.174868	0.280522	0.0062	0.090848	0.604194
3075	CFH	0.363082	0.582415	0.0026	0.0546721	0.604087
4735	Septin 2	0.373454	0.598947	0.0004	0.0154398	0.603805
83693	HSDL1	0.358714	0.575289	0.0058	0.0872092	0.603756
23194	FBXL7	0.341427	0.547535	0.0106	0.123519	0.603666
3099	HK2	0.506182	0.811561	0.0284	0.207888	0.6033
55644	OSGEP	0.256458	0.410958	0.0458	0.265179	0.602437
219960	OR10Q1	0.301544	0.483204	0.0468	0.267991	0.602431
375061	FAM89A	0.338265	0.54203	0.0044	0.0751742	0.602385
30812	SOX8	0.349572	0.560147	0.0316	0.221306	0.602378
55178	RNMTL1	0.235513	0.377281	0.0078	0.103144	0.601955
57709	SLC7A14	0.230605	0.369354	0.0006	0.0205441	0.601673
56995	TULP4	0.472067	0.756086	0.0028	0.0567315	0.601651
7850	IL1R2	0.264403	0.42338	0.0166	0.158174	0.601267
64063	PRSS22	0.319899	0.512106	0.0198	0.17214	0.600835
148870	CCDC27	0.19266	0.308397	0.0014	0.0366484	0.600737
2879	GPX4	0.255816	0.409409	0.003	0.0595536	0.600406
148022	TICAM1	0.130858	0.209384	0.0242	0.193264	0.600088
2044	EPHA5	0.470415	0.752624	0	0	0.599916
1487	CTBP1	0.247341	0.395716	0.0824	0.349179	0.599881
259215	LY6G6F	0.178071	0.284891	0.0496	0.27496	0.599872
8270	LAGE3	0.215849	0.345315	0.0008	0.0250752	0.599796
129790	C7orf13	0.240139	0.384106	0.0014	0.0366484	0.599518
574042	SNORA10	0.330509	0.528653	0.0002	0.00928969	0.599512
124454	EARS2	0.203693	0.325778	0.0222	0.183897	0.599357
3417	IDH1	0.351857	0.562727	0.001	0.0288495	0.599304
118812	MORN4	0.231226	0.369789	0.0042	0.0741111	0.59925
23306	TMEM194A	0.287794	0.460239	0.0092	0.11389	0.599193
29083	GTPBP8	0.334056	0.534205	0	0	0.599148
6865	TACR2	0.231649	0.370426	0.0462	0.265925	0.599083
55466	DNAJA4	0.297998	0.476317	0.0458	0.265179	0.598387
126298	IRGQ	0.230052	0.36768	0.0006	0.0205441	0.598249
85315	PAQR8	0.403725	0.645231	0.0072	0.0988148	0.598194
54508	FLJ11235	0.330263	0.527809	0.0236	0.190571	0.598147
326342	EMR4P	0.210586	0.336512	0.0218	0.182671	0.597979
150244	ZDHHC8P1	0.253641	0.405296	0.0126	0.135814	0.597915
9943	OXSR1	0.243871	0.389664	0.0066	0.0932669	0.59783
5891	MOK	0.267816	0.427909	0.054	0.286221	0.597771
5445	PON2	0.561886	0.897429	0.0044	0.0751742	0.597173
7182	NR2C2	0.261048	0.416938	0.0032	0.0624094	0.597171
167359	NIM1	0.294282	0.469966	0.0016	0.0402413	0.596989
6776	STAT5A	0.279345	0.4461	0.0094	0.115508	0.596948
131405	TRIM71	0.239734	0.382831	0.0504	0.277092	0.596896
284440	LOC284440	0.350908	0.560315	0.0146	0.146748	0.596758
146167	SLC38A8	0.533043	0.851092	0.0132	0.139664	0.596666
8477	GPR65	0.341733	0.545438	0.0234	0.189599	0.596093
8543	LMO4	0.245362	0.391454	0.0204	0.174715	0.595412
9406	ZRANB2	0.259441	0.413912	0.0344	0.230647	0.595401
5387	PMS2P3	0.292391	0.466348	0.0028	0.0567315	0.594944
6911	TBX6	0.211069	0.336622	0.0154	0.150878	0.594845
90665	TBL1Y	0.275967	0.440085	0.0002	0.00928969	0.5947
7078	TIMP3	0.460577	0.73438	0.0008	0.0250752	0.594479
9296	ATP6V1F	0.184314	0.293812	0.0046	0.0769358	0.594083
23683	PRKD3	0.740447	1.18033	0.0656	0.315239	0.594075
10254	STAM2	0.240754	0.383753	0.0456	0.264388	0.593962
5435	POLR2F	0.293378	0.467569	0.0124	0.134879	0.593744
157638	FAM84B	0.389889	0.621347	0.0122	0.133751	0.593652
56242	ZNF253	0.326005	0.519516	0.002	0.0467087	0.593586
8973	CHRNA6	0.340484	0.542549	0.0046	0.0769358	0.593467
1539	CYLC2	0.325797	0.51903	0.0428	0.256446	0.593109
606551	UBE2MP1	0.248302	0.395561	0.0378	0.241223	0.593063
776	CACNA1D	0.319371	0.50865	0.0104	0.122819	0.592661
113402	SFT2D1	0.316337	0.503793	0	0	0.592584
55370	PPP4R1L	0.20635	0.328475	0.0692	0.323886	0.591831
10417	SPON2	0.609268	0.96945	0.0522	0.281877	0.591171
389073	C2orf80	0.385307	0.613043	0.0412	0.251008	0.591053
387097	C6orf147	0.371013	0.590225	0.0002	0.00928969	0.590846
123920	CMTM3	0.365391	0.581273	0.0222	0.183897	0.590826
6664	SOX11	0.307218	0.488605	0.0014	0.0366484	0.590418
22844	FRMPD1	0.29976	0.476667	0.0076	0.101465	0.590162
51076	CUTC	0.189525	0.301367	0.009	0.112164	0.59012
79089	TMUB2	0.152059	0.241742	0.0566	0.293016	0.589785
56603	CYP26B1	0.469152	0.745748	0.0048	0.0790909	0.589565
1612	DAPK1	0.273368	0.434451	0.0138	0.143732	0.589256
2122	MECOM	0.405119	0.643718	0.0042	0.0741111	0.58896
9552	SPAG7	0.153191	0.243401	0.0036	0.0673737	0.588867
80273	GRPEL1	0.243455	0.386667	0.003	0.0595536	0.588251
387338	NSUN4	0.169607	0.269373	0.012	0.133045	0.588223
340596	LHFPL1	0.451731	0.717391	0.0156	0.151945	0.588093
27098	CLUL1	0.2477	0.393366	0.0412	0.251008	0.588072
23251	KIAA1024	0.27995	0.444527	0.0084	0.108329	0.58788
3361	HTR5A	0.428332	0.679626	0.0394	0.247176	0.58668
537	ATP6AP1	0.322157	0.511102	0.0176	0.162773	0.5865
10335	MRVI1	0.493006	0.782032	0.0204	0.174715	0.586252
389072	PLEKHM3	0.274547	0.435468	0.0054	0.0838408	0.586136
201266	SLC39A11	0.214992	0.340846	0.0122	0.133751	0.585388
27231	ITGB1BP3	0.150215	0.238148	0.0178	0.163354	0.585384
93343	FAM125A	0.250162	0.396441	0.0716	0.329088	0.584741
669	BPGM	0.22315	0.353623	0.0012	0.0331841	0.58469
25927	CNRIP1	0.312211	0.494697	0.002	0.0467087	0.5845
27352	SGSM3	0.272443	0.431678	0.007	0.0969477	0.584472
389715	FAM205B	0.147059	0.232967	0.0278	0.205572	0.584178
10385	BTN2A2	0.218191	0.345622	0.001	0.0288495	0.584033
3203	HOXA6	0.35995	0.57011	0.0006	0.0205441	0.583857
3664	IRF6	0.315639	0.49985	0.0082	0.106658	0.583614
260425	MAGI3	0.243466	0.385495	0.0074	0.100077	0.583366
84733	CBX2	0.188614	0.29863	0.0248	0.195805	0.583282
163081	ZNF567	0.361578	0.572454	0.0056	0.0854346	0.583208
57415	C3orf14	0.282311	0.446869	0.0534	0.284487	0.582897
3206	HOXA10	0.153217	0.242444	0.0058	0.0872092	0.582362
54757	FAM20A	0.472575	0.747781	0.0418	0.252908	0.582352
4938	OAS1	0.283031	0.44785	0.0122	0.133751	0.582335
79570	NKAIN1	0.186592	0.295166	0.0236	0.190571	0.581885
84874	ZNF514	0.436921	0.691102	0.0044	0.0751742	0.581757
219771	CCNY	0.0945105	0.149492	0.0296	0.212567	0.581746
10488	CREB3	0.202732	0.32067	0.0006	0.0205441	0.581742
3295	HSD17B4	0.240498	0.380395	0.0216	0.181726	0.581698
26112	CCDC69	0.280138	0.442858	0.0002	0.00928969	0.580856
152217	LOC152217	0.235945	0.372908	0.0152	0.149799	0.580489
8195	MKKS	0.179062	0.282961	0.0062	0.090848	0.580242
79077	DCTPP1	0.30328	0.47925	0.0278	0.205572	0.580223
161394	SAMD15	0.296909	0.469093	0.0208	0.177593	0.579922
353145	LCE3E	0.472815	0.746996	0.0038	0.0695554	0.579891
253650	ANKRD18A	0.232143	0.366742	0.1246	0.424962	0.57981
349075	ZNF713	0.321846	0.508354	0.043	0.256906	0.579492
57460	PPM1H	0.216831	0.34243	0.0384	0.24356	0.579248
29126	CD274	0.185148	0.292377	0.0124	0.134879	0.579154
2177	FANCD2	0.264426	0.417563	0.0118	0.13188	0.579131
8128	ST8SIA2	0.320378	0.505898	0.0184	0.165938	0.579069
6429	SRSF4	0.312924	0.494062	0.066	0.316159	0.578858
27239	GPR162	0.224826	0.354942	0.0038	0.0695554	0.578738
80110	ZNF614	0.304356	0.480345	0.0398	0.247914	0.578234
7620	ZNF69	0.389951	0.615344	0.0022	0.0495074	0.578004
7283	TUBG1	0.307893	0.485809	0.008	0.104874	0.577848
83957	FRMD8P1	0.198507	0.313181	0.0456	0.264388	0.577682
51545	ZNF581	0.258656	0.407973	0.0046	0.0769358	0.577279
23369	PUM2	0.245141	0.386609	0.0602	0.303457	0.577084
677838	SNORA61	0.270761	0.426982	0.0202	0.173537	0.576969
113278	C20orf54	0.716886	1.13028	0.0228	0.186734	0.576651
54958	TMEM160	0.193911	0.305713	0.0356	0.234266	0.576568
27289	RND1	0.379656	0.598417	0.0134	0.140975	0.576208
55974	SLC50A1	0.204283	0.321872	0.0012	0.0331841	0.575617
168451	THAP5	0.527666	0.831335	0.0002	0.00928969	0.575496
80194	TMEM134	0.244045	0.38447	0.006	0.0892507	0.575407
10725	NFAT5	0.21889	0.344826	0.0296	0.212567	0.575341
163859	C1orf55	0.18908	0.297815	0.0038	0.0695554	0.575073
7014	TERF2	0.319391	0.502903	0.0152	0.149799	0.574566
23456	ABCB10	0.382699	0.602477	0.0202	0.173537	0.574282
4066	LYL1	0.220959	0.347848	0.0112	0.127656	0.574268
10077	TSPAN32	0.225894	0.355571	0	0	0.574059
337963	KRTAP23-1	0.195795	0.308186	0.0014	0.0366484	0.574024
7314	UBB	0.217098	0.3417	0.0044	0.0751742	0.573947
80896	NPL	0.490941	0.772711	0.001	0.0288495	0.573938
3782	KCNN3	0.267432	0.420798	0.0328	0.225822	0.573475
701	BUB1B	0.307284	0.483469	0.0032	0.0624094	0.573361
728642	CDK11A	0.250911	0.394764	0.0252	0.19682	0.573324
57333	RCN3	0.170907	0.268852	0.0106	0.123519	0.573091
56477	CCL28	0.268685	0.422642	0.0284	0.207888	0.573005
10054	UBA2	0.223443	0.351427	0.0288	0.209803	0.572782
2041	EPHA1	0.226492	0.356198	0.0126	0.135814	0.57267
7453	WARS	0.240879	0.378821	0.0408	0.250401	0.572661
129831	RBM45	0.173538	0.272884	0.0326	0.225375	0.572478
573	BAG1	0.146305	0.230008	0.018	0.164286	0.572116
9487	PIGL	0.267754	0.420928	0.0168	0.15908	0.57207
8340	HIST1H2BL	0.352192	0.553597	0.0002	0.00928969	0.57186
91647	ATPAF2	0.24293	0.381722	0.0066	0.0932669	0.571324
9209	LRRFIP2	0.141137	0.221758	0.0174	0.162546	0.571231
5498	PPOX	0.123668	0.194302	0.0268	0.202579	0.571155
200205	IBA57	0.307856	0.483677	0.0022	0.0495074	0.571117
731220	RFX8	0.187317	0.294234	0.0288	0.209803	0.570781
51720	UIMC1	0.13996	0.219822	0.0036	0.0673737	0.570605
6560	SLC12A4	0.325444	0.511037	0.0032	0.0624094	0.570278
83849	SYT15	0.227765	0.357551	0.0444	0.261522	0.569826
80139	ZNF703	0.202122	0.317275	0.0292	0.211149	0.569722
8999	CDKL2	0.202516	0.317893	0.0636	0.310278	0.569717
4221	MEN1	0.197657	0.31025	0.028	0.20641	0.569639
3936	LCP1	0.395279	0.620408	0.0004	0.0154398	0.569545
23042	PDXDC1	0.209276	0.328465	0.0092	0.11389	0.569534
326624	RAB37	0.353426	0.554637	0.0242	0.193264	0.569316
100316904	SAP25	0.160125	0.251266	0.0532	0.283966	0.569188
5141	PDE4A	0.172601	0.270824	0.0434	0.258094	0.56908
8343	HIST1H2BF	0.304969	0.478514	0.0252	0.19682	0.569059
83591	THAP2	0.286239	0.449118	0.0682	0.321253	0.569033
5438	POLR2I	0.236019	0.37031	0.0188	0.167731	0.568983
6448	SGSH	0.190256	0.298508	0.0146	0.146748	0.568983
8208	CHAF1B	0.19294	0.302636	0.0338	0.229019	0.568549
8653	DDX3Y	0.274648	0.43072	0.0162	0.155967	0.56826
23598	PATZ1	0.222497	0.348758	0.068	0.320582	0.567469
11309	SLCO2B1	0.604901	0.947837	0.0026	0.0546721	0.566929
7259	TSPYL1	0.304837	0.477623	0.0054	0.0838408	0.566814
6902	TBCA	0.195452	0.306198	0.0274	0.20461	0.566614
6235	RPS29	0.262855	0.411716	0.0126	0.135814	0.56632
23261	CAMTA1	0.193305	0.302766	0.0088	0.11058	0.566259
10024	TROAP	0.212015	0.332064	0.0028	0.0567315	0.566231
142940	TRUB1	0.378989	0.593456	0.0002	0.00928969	0.56589
91409	CCDC74B	0.27273	0.427024	0.0378	0.241223	0.56574
58524	DMRT3	0.691255	1.08217	0.0006	0.0205441	0.565522
25824	PRDX5	0.193107	0.302294	0.0078	0.103144	0.565425
23299	BICD2	0.345443	0.54055	0.0334	0.227603	0.564803
338328	GPIHBP1	0.368679	0.576897	0.0354	0.23378	0.564766
4250	SCGB2A2	0.221076	0.345906	0.0132	0.139664	0.564653
677813	SNORA30	0.207984	0.325385	0.0046	0.0769358	0.564472
12	SERPINA3	0.780236	1.22062	0.003	0.0595536	0.564428
56952	PRTFDC1	0.355422	0.556019	0.004	0.0717204	0.564391
27293	SMPDL3B	0.170034	0.265999	0.0416	0.252247	0.564391
9397	NMT2	0.275318	0.430698	0.0042	0.0741111	0.564365
92259	MRPS36	0.229733	0.359371	0.0106	0.123519	0.564295
130120	REG3G	0.16981	0.265627	0.0196	0.171205	0.564266
161	AP2A2	0.204691	0.32019	0.0978	0.378731	0.564261
5368	PNOC	0.471343	0.737259	0.0002	0.00928969	0.564168
53827	FXYD5	0.266553	0.416921	0.0454	0.263871	0.564125
257396	LOC257396	0.301872	0.472132	0.0008	0.0250752	0.564011
84219	WDR24	0.142646	0.223074	0.0026	0.0546721	0.563829
5537	PPP6C	0.331954	0.519087	0.0184	0.165938	0.563732
1674	DES	0.292608	0.457492	0.0242	0.193264	0.563496
1745	DLX1	0.394028	0.615945	0.022	0.183517	0.563202
54977	SLC25A38	0.159556	0.249413	0.0004	0.0154398	0.563167
7220	TRPC1	0.30352	0.474397	0	0	0.562985
4287	ATXN3	0.219491	0.342865	0.0212	0.179903	0.56209
389633	FAM90A25P	0.360072	0.562455	0.0086	0.109805	0.562061
84824	FCRLA	0.191393	0.298966	0.0726	0.331219	0.562047
56129	PCDHB7	0.33445	0.522397	0.0256	0.197538	0.56196
1939	EIF2D	0.215168	0.33604	0.0244	0.194025	0.561753
1069	CETN2	0.159528	0.249133	0.0606	0.304461	0.561682
8896	BUD31	0.280242	0.437491	0.044	0.260547	0.56112
91942	NDUFAF2	0.207876	0.324488	0.0114	0.129228	0.560973
84966	IGSF21	0.332418	0.518851	0.0022	0.0495074	0.560839
170685	NUDT10	0.42509	0.663491	0.0272	0.203847	0.560827
2771	GNAI2	0.397477	0.620336	0.0218	0.182671	0.560687
3790	KCNS3	0.316253	0.493537	0.0138	0.143732	0.560578
10556	RPP30	0.228038	0.355766	0.0184	0.165938	0.560119
3225	HOXC9	0.39212	0.611442	0.0022	0.0495074	0.559325
79169	C1orf35	0.128756	0.200696	0.0024	0.051974	0.558723
146336	LOC146336	0.252813	0.39397	0.0914	0.366633	0.558345
64419	MTMR14	0.15212	0.237044	0.009	0.112164	0.558277
246705	LINC00314	0.204064	0.317961	0.006	0.0892507	0.558142
100534592	URGCP-MRPS24	0.20563	0.320382	0.0104	0.122819	0.558051
196051	PPAPDC1A	0.314346	0.489728	0.0328	0.225822	0.55793
26047	CNTNAP2	0.589236	0.917949	0.0222	0.183897	0.557862
81611	ANP32E	0.265998	0.41436	0.0336	0.228313	0.557758
287	ANK2	0.196841	0.306619	0.1212	0.420343	0.557701
80198	MUS81	0.189618	0.295362	0.0152	0.149799	0.557665
85019	TMEM241	0.261213	0.406849	0.0178	0.163354	0.557537
29766	TMOD3	0.206395	0.321341	0.014	0.144283	0.556922
283554	GPR137C	0.351488	0.547205	0.0162	0.155967	0.556823
55527	FEM1A	0.245666	0.3824	0.0102	0.12123	0.556588
7102	TSPAN7	0.213308	0.33196	0.0076	0.101465	0.556251
219793	C10orf27	0.150548	0.234278	0.1894	0.511208	0.556168
55848	C9orf46	0.247686	0.385315	0.0268	0.202579	0.555658
26589	MRPL46	0.243684	0.378792	0.0064	0.0921589	0.554438
28957	MRPS28	0.370425	0.575783	0.015	0.148884	0.554384
149297	FAM78B	0.188564	0.293076	0.0912	0.366272	0.55425
114780	PKD1L2	0.497725	0.773567	0.0374	0.240233	0.554205
338761	C1QL4	0.222155	0.345258	0.0342	0.230046	0.554129
5921	RASA1	0.219136	0.340533	0.0178	0.163354	0.553977
5723	PSPH	0.204582	0.317906	0.0024	0.051974	0.553931
2904	GRIN2B	0.219135	0.340507	0.0194	0.17062	0.553865
3430	IFI35	0.333931	0.518769	0.0098	0.118245	0.553522
390992	HES3	0.217473	0.337799	0.0202	0.173537	0.553293
4494	MT1F	0.570966	0.886868	0.0042	0.0741111	0.553277
127700	OSCP1	0.221937	0.344721	0.0178	0.163354	0.553243
11278	KLF12	0.247914	0.385027	0.0222	0.183897	0.553068
442361	OR2A2	0.214491	0.333029	0.0612	0.305359	0.552649
81631	MAP1LC3B	0.243456	0.377997	0.0928	0.368965	0.552633
85379	KIAA1671	0.27795	0.431462	0.0048	0.0790909	0.552305
81570	CLPB	0.237082	0.368007	0.011	0.126152	0.552234
27328	PCDH11X	0.207828	0.322553	0.006	0.0892507	0.552017
6051	RNPEP	0.212426	0.329682	0.0656	0.315239	0.551987
92140	MTDH	0.222759	0.345636	0.0194	0.17062	0.551614
50618	ITSN2	0.248489	0.385539	0.0342	0.230046	0.551535
7172	TPMT	0.368471	0.57166	0.0364	0.236728	0.551439
55260	TMEM143	0.253392	0.39302	0.0038	0.0695554	0.551034
7105	TSPAN6	0.314514	0.487805	0.0004	0.0154398	0.550981
55314	TMEM144	0.774515	1.20109	0.0054	0.0838408	0.550767
26284	ERAL1	0.224019	0.347383	0.0224	0.184728	0.550683
4009	LMX1A	0.164388	0.254905	0.051	0.279102	0.550633
2268	FGR	0.194777	0.302021	0.027	0.203262	0.550594
26115	TANC2	0.207401	0.32159	0.0384	0.24356	0.550573
60559	SPCS3	0.276701	0.429027	0.006	0.0892507	0.55051
9535	GMFG	0.178056	0.276025	0.0132	0.139664	0.550217
168507	PKD1L1	0.259821	0.402694	0.033	0.226544	0.549894
283951	C16orf91	0.255008	0.395178	0.0052	0.0820341	0.549669
50489	CD207	0.203438	0.315235	0.0048	0.0790909	0.549541
140699	C20orf132	0.233568	0.361886	0.0062	0.090848	0.549381
55677	IWS1	0.188862	0.292566	0.0028	0.0567315	0.5491
23536	ADAT1	0.291221	0.451097	0.0022	0.0495074	0.548984
90362	FAM110B	0.270581	0.419075	0.0262	0.200314	0.548798
2995	GYPC	0.280086	0.433771	0.0504	0.277092	0.548709
5757	PTMA	0.214092	0.331434	0.0404	0.249323	0.548094
257160	RNF214	0.181508	0.280972	0.0158	0.153356	0.547988
85329	LGALS12	0.171771	0.265881	0.024	0.19296	0.547879
3654	IRAK1	0.242593	0.375438	0.0108	0.125062	0.547605
3036	HAS1	0.398342	0.616424	0.0086	0.109805	0.547473
55061	SUSD4	0.342286	0.529671	0.0012	0.0331841	0.547452
84310	C7orf50	0.185335	0.286748	0.0456	0.264388	0.547185
121441	NEDD1	0.36232	0.560561	0.011	0.126152	0.547146
256281	NUDT14	0.310656	0.480483	0.0156	0.151945	0.546671
24137	KIF4A	0.219852	0.339953	0.0034	0.0647203	0.546284
100506334	LOC100506334	0.208791	0.322699	0.068	0.320582	0.54556
5055	SERPINB2	0.362766	0.560646	0.0116	0.130784	0.545477
10193	RNF41	0.226368	0.349804	0.0026	0.0546721	0.545292
9551	ATP5J2	0.246129	0.380337	0.0028	0.0567315	0.545273
158293	FAM120AOS	0.18004	0.278134	0.002	0.0467087	0.544844
1478	CSTF2	0.251495	0.38846	0.0378	0.241223	0.544602
130075	OR9A4	0.183847	0.283936	0.0314	0.220461	0.544416
353137	LCE1F	0.385906	0.595953	0.0214	0.180498	0.544298
8886	DDX18	0.292639	0.451889	0.0006	0.0205441	0.544183
8398	PLA2G6	0.239685	0.370013	0.0428	0.256446	0.543747
94031	HTRA3	0.391864	0.604922	0.041	0.250706	0.543702
23504	RIMBP2	0.256253	0.395519	0.0074	0.100077	0.543471
54778	RNF111	0.323217	0.498856	0.0338	0.229019	0.543406
154091	SLC2A12	0.424701	0.655473	0.0254	0.197089	0.543376
2891	GRIA2	0.210709	0.325197	0.0406	0.249817	0.543346
26127	FGFR1OP2	0.218863	0.337776	0.0098	0.118245	0.543324
9972	NUP153	0.221218	0.341406	0.003	0.0595536	0.543299
3703	STT3A	0.224328	0.346182	0.0596	0.301709	0.543195
84850	GLIS3-AS1	0.215692	0.332851	0.0094	0.115508	0.543178
57705	WDFY4	0.132102	0.203855	0.014	0.144283	0.543161
91584	PLXNA4	0.432488	0.667379	0.0168	0.15908	0.543117
390199	OR4D9	0.23313	0.359747	0.0192	0.169846	0.543116
29970	SCHIP1	0.263455	0.406525	0.0194	0.17062	0.543051
10411	RAPGEF3	0.272496	0.420442	0.0228	0.186734	0.542925
4137	MAPT	0.295441	0.455839	0.0056	0.0854346	0.542911
150384	CN5H6.4	0.280637	0.432945	0.0454	0.263871	0.542726
8814	CDKL1	0.416907	0.643155	0.0154	0.150878	0.542681
114134	SLC2A13	0.572955	0.883367	0.0014	0.0366484	0.541775
100506470	LOC100506470	0.283168	0.436581	0.0394	0.247176	0.541772
150483	TEKT4	0.178683	0.27548	0.0266	0.201616	0.541724
9349	RPL23	0.193543	0.298374	0.0404	0.249323	0.541639
4879	NPPB	0.431646	0.665387	0.067	0.318298	0.541509
125488	TTC39C	0.188796	0.291012	0.0076	0.101465	0.541413
7221	TRPC2	0.163532	0.252062	0.0738	0.3335	0.541356
6611	SMS	0.254252	0.391813	0.0658	0.315745	0.541043
84057	MND1	0.295775	0.455546	0.07	0.325139	0.540179
2128	EVX1	0.220784	0.340029	0.0006	0.0205441	0.540098
100526842	RPL17-C18ORF32	0.184913	0.284765	0.0156	0.151945	0.539993
23417	MLYCD	0.174736	0.269081	0.0394	0.247176	0.539927
7301	TYRO3	0.241927	0.37247	0.0828	0.349719	0.539595
81392	OR2AE1	0.255259	0.392966	0.0112	0.127656	0.539477
134466	ZNF300P1	0.627404	0.965783	0.0232	0.188712	0.539332
83464	APH1B	0.223445	0.343922	0.0736	0.333047	0.539177
55700	MAP7D1	0.167087	0.257105	0.0166	0.158174	0.538756
54885	TBC1D8B	0.219325	0.33745	0.0434	0.258094	0.538583
65985	AACS	0.267311	0.411194	0.0172	0.16131	0.538262
146861	SLC35G3	0.220211	0.338699	0.0234	0.189599	0.538069
28982	FLVCR1	0.272873	0.419641	0.0022	0.0495074	0.537859
80975	TMPRSS5	0.586902	0.902413	0.0024	0.051974	0.537587
23220	DTX4	0.220551	0.339066	0.034	0.229534	0.537357
1232	CCR3	0.24084	0.370022	0.0214	0.180498	0.53638
387104	C6orf174	0.310015	0.476246	0.0064	0.0921589	0.536201
57148	RALGAPB	0.238236	0.365912	0.0496	0.27496	0.535925
169044	COL22A1	0.319774	0.491104	0.086	0.355667	0.535785
221830	TWISTNB	0.305901	0.469716	0.0184	0.165938	0.535513
11218	DDX20	0.292257	0.448681	0.0108	0.125062	0.535228
5731	PTGER1	0.298291	0.457901	0.0166	0.158174	0.535082
2977	GUCY1A2	0.320353	0.491763	0.0066	0.0932669	0.535068
100533107	RTEL1-TNFRSF6B	0.171561	0.263345	0.004	0.0717204	0.534997
144423	GLT1D1	0.353598	0.542684	0.0062	0.090848	0.534749
56479	KCNQ5	0.424241	0.65105	0	0	0.534622
79567	FAM65A	0.242392	0.371954	0.0026	0.0546721	0.534518
92293	TMEM132C	0.251983	0.386653	0.035	0.23252	0.534441
55203	LGI2	0.387354	0.594303	0.022	0.183517	0.534262
10092	ARPC5	0.268466	0.411841	0.0168	0.15908	0.534051
24141	LAMP5	0.478494	0.733979	0.0064	0.0921589	0.533936
2683	B4GALT1	0.255764	0.392298	0.0084	0.108329	0.533831
4329	ALDH6A1	0.41544	0.637201	0.04	0.248232	0.533797
1363	CPE	0.230022	0.352741	0.0066	0.0932669	0.533514
80731	THSD7B	0.341928	0.52434	0.1242	0.424741	0.533483
23043	TNIK	0.198366	0.304178	0.0046	0.0769358	0.533414
85001	MGC16275	0.314823	0.482582	0.0018	0.0435631	0.532865
9785	DHX38	0.215633	0.330526	0.0004	0.0154398	0.532821
27165	GLS2	0.393583	0.603283	0.0196	0.171205	0.532798
54499	TMCO1	0.290805	0.445715	0.0066	0.0932669	0.532696
221883	HOXA11-AS1	0.167263	0.256358	0.0494	0.27449	0.532665
1946	EFNA5	0.26279	0.402757	0.0274	0.20461	0.532621
55125	CEP192	0.319469	0.489622	0.0064	0.0921589	0.53261
5373	PMM2	0.256677	0.393373	0.0198	0.17214	0.532557
677807	SNORA22	0.35681	0.546824	0.046	0.265783	0.532536
83860	TAF3	0.572603	0.87725	0.0426	0.255615	0.53204
2117	ETV3	0.236711	0.362628	0.0132	0.139664	0.531941
5869	RAB5B	0.160602	0.245961	0.065	0.313894	0.531494
9506	PAGE4	0.273515	0.418874	0.0348	0.232488	0.531447
8927	BSN	0.36302	0.555849	0.0826	0.349405	0.53118
26239	LCE2B	0.211693	0.324127	0.0306	0.217222	0.531116
256714	MAP7D2	0.323457	0.495234	0.0284	0.207888	0.531068
8760	CDS2	0.202546	0.310084	0.0004	0.0154398	0.53093
348801	LNP1	0.2491	0.38133	0.0058	0.0872092	0.53083
1428	CRYM	0.547975	0.838741	0.0496	0.27496	0.53062
4856	NOV	0.553515	0.847218	0.0924	0.367989	0.530614
6082	SNORD20	0.2702	0.413552	0.0024	0.051974	0.530543
79158	GNPTAB	0.250369	0.383128	0.0346	0.231523	0.530257
256329	C11orf35	0.182483	0.279233	0.0618	0.306154	0.530188
284325	C19orf54	0.28835	0.441147	0.0786	0.343643	0.529901
197370	NSMCE1	0.185084	0.283147	0.0176	0.162773	0.529824
80775	TMEM177	0.286242	0.437864	0.0132	0.139664	0.529703
23635	SSBP2	0.253652	0.388003	0.089	0.36197	0.529668
5048	PAFAH1B1	0.319303	0.48833	0.0284	0.207888	0.529363
10675	CSPG5	0.407131	0.62261	0.001	0.0288495	0.529261
90827	ZNF479	0.429715	0.656941	0.0066	0.0932669	0.528784
995	CDC25C	0.174831	0.267271	0.049	0.273727	0.528739
10328	COX4NB	0.143815	0.219834	0.0168	0.15908	0.528583
80332	ADAM33	0.228904	0.349891	0.018	0.164286	0.528551
5436	POLR2G	0.28216	0.431271	0.0104	0.122819	0.528465
8916	HERC3	0.304249	0.464953	0.0012	0.0331841	0.528198
245973	ATP6V1C2	0.237958	0.363647	0.0256	0.197538	0.528197
149986	LSM14B	0.288249	0.440498	0.1806	0.500999	0.528188
5525	PPP2R5A	0.169099	0.258408	0.0396	0.247779	0.528144
10840	ALDH1L1	0.42038	0.642391	0.0572	0.294841	0.528121
5520	PPP2R2A	0.233678	0.357006	0.0066	0.0932669	0.527767
6118	RPA2	0.265058	0.404936	0.015	0.148884	0.52773
4905	NSF	0.308437	0.471168	0.01	0.119706	0.527599
3396	ICT1	0.256067	0.391132	0.0172	0.16131	0.527458
151188	ARL6IP6	0.354579	0.541572	0.0102	0.12123	0.527364
3914	LAMB3	0.468182	0.715076	0.0096	0.117103	0.527346
63941	NECAB3	0.200132	0.305655	0.0046	0.0769358	0.52727
388743	CAPN8	0.281224	0.429495	0.0148	0.147602	0.527232
64710	NUCKS1	0.24495	0.374032	0.015	0.148884	0.526975
283481	LOC283481	0.343288	0.524147	0.0038	0.0695554	0.526842
9517	SPTLC2	0.387018	0.590894	0.0114	0.129228	0.526784
94234	FOXQ1	0.460187	0.702441	0.0242	0.193264	0.526426
23271	CAMSAP2	0.337446	0.515044	0.0202	0.173537	0.526298
55750	AGK	0.275282	0.420158	0.0072	0.0988148	0.526283
11185	INMT	0.232119	0.354264	0.0212	0.179903	0.526216
94081	SFXN1	0.273473	0.417366	0.0066	0.0932669	0.52617
81614	NIPA2	0.24839	0.379023	0.0248	0.195805	0.525919
92703	TMEM183A	0.193787	0.295673	0.0432	0.257455	0.525765
203102	ADAM32	0.230144	0.351132	0.014	0.144283	0.525706
23353	SUN1	0.299376	0.456725	0.0056	0.0854346	0.525587
9321	TRIP11	0.275483	0.420223	0.006	0.0892507	0.525406
10263	CDK2AP2	0.323235	0.493024	0.0276	0.20482	0.525281
9057	SLC7A6	0.17598	0.268396	0.134	0.437698	0.525156
132243	H1FOO	0.237316	0.361896	0.0078	0.103144	0.524951
255349	TMEM211	0.192825	0.294038	0.036	0.235782	0.524894
10907	TXNL4A	0.274787	0.419013	0.0374	0.240233	0.524863
2746	GLUD1	0.450292	0.686597	0.018	0.164286	0.524781
3597	IL13RA1	0.402553	0.613609	0.0212	0.179903	0.524293
84790	TUBA1C	0.466554	0.71093	0.101	0.384164	0.523789
114659	LRRC37B	0.234482	0.3573	0.0142	0.144469	0.523784
4435	CITED1	0.406074	0.618585	0.018	0.164286	0.523332
54981	C9orf95	0.488581	0.744206	0.0472	0.268713	0.523198
10509	SEMA4B	0.257212	0.391763	0.0636	0.310278	0.523112
8313	AXIN2	0.283731	0.432086	0.02	0.172977	0.522875
128817	CSTL1	0.155608	0.236945	0.0516	0.280179	0.522701
8864	PER2	0.160806	0.244848	0.0104	0.122819	0.522627
54930	HAUS4	0.197516	0.300732	0.0244	0.194025	0.522574
51319	RSRC1	0.410143	0.624412	0.0176	0.162773	0.522425
23511	NUP188	0.273244	0.415951	0.0384	0.24356	0.522273
146705	C17orf56	0.221204	0.336728	0.0698	0.324844	0.522247
23133	PHF8	0.182668	0.278065	0.0278	0.205572	0.522243
28951	TRIB2	0.226127	0.344212	0.057	0.294174	0.522203
2700	GJA3	0.194169	0.295526	0.009	0.112164	0.522005
79602	ADIPOR2	0.394457	0.600341	0.0312	0.219983	0.521942
4784	NFIX	0.32561	0.495463	0.0344	0.230647	0.521646
57690	TNRC6C	0.272519	0.414644	0.0066	0.0932669	0.521525
9474	ATG5	0.270133	0.410946	0.0174	0.162546	0.521271
1290	COL5A2	0.46335	0.70486	0.0334	0.227603	0.521225
5142	PDE4B	0.283411	0.431114	0.0608	0.304823	0.521164
932	MS4A3	0.284487	0.432726	0.0464	0.266616	0.521076
4992	OR1F1	0.188976	0.287401	0.096	0.374369	0.520831
1616	DAXX	0.158591	0.241175	0.0378	0.241223	0.520737
7059	THBS3	0.183591	0.27919	0.0206	0.176247	0.520719
1028	CDKN1C	0.293244	0.445888	0.0178	0.163354	0.520536
378938	MALAT1	0.486006	0.738967	0.0404	0.249323	0.520491
196883	ADCY4	0.202995	0.308652	0.047	0.268491	0.520487
221336	BEND6	0.544692	0.828088	0.0782	0.343219	0.520287
84216	TMEM117	0.230168	0.349914	0.0848	0.353598	0.520253
114795	TMEM132B	0.279401	0.42466	0.0088	0.11058	0.519893
10586	MAB21L2	0.395228	0.600693	0.005	0.0804778	0.519865
440556	FLJ42875	0.428135	0.650698	0.0044	0.0751742	0.519843
201625	DNAH12	0.20326	0.308891	0.0392	0.246478	0.519683
643	CXCR5	0.19318	0.29357	0.0564	0.292617	0.519665
5663	PSEN1	0.314166	0.47741	0.018	0.164286	0.519609
256691	MAMDC2	0.454954	0.691221	0.0384	0.24356	0.51932
65018	PINK1	0.274584	0.417149	0.0486	0.272588	0.519203
10912	GADD45G	0.416546	0.632769	0.0374	0.240233	0.519086
9139	CBFA2T2	0.15049	0.228579	0.0704	0.325727	0.518897
116135	LRRC3B	0.374697	0.569072	0.0044	0.0751742	0.518752
8914	TIMELESS	0.202091	0.306876	0.0536	0.285097	0.518508
50855	PARD6A	0.30934	0.469666	0.0122	0.133751	0.518286
22995	CEP152	0.367242	0.55755	0.0048	0.0790909	0.51821
57409	MIF4GD	0.182708	0.277384	0.0322	0.223351	0.518186
158131	OR1Q1	0.22712	0.344719	0.0292	0.211149	0.517785
55611	OTUB1	0.191441	0.290555	0.0164	0.157076	0.517731
347169	OR1B1	0.282847	0.429272	0.01	0.119706	0.517682
5106	PCK2	0.175435	0.266227	0.143	0.451187	0.517523
3778	KCNMA1	0.191677	0.290828	0.0086	0.109805	0.517284
10410	IFITM3	0.556098	0.84369	0.0158	0.153356	0.517161
8818	DPM2	0.267139	0.405268	0.0258	0.198439	0.51707
5830	PEX5	0.18406	0.279207	0.0196	0.171205	0.516938
26301	GBGT1	0.183919	0.278931	0.067	0.318298	0.5166
84226	C2orf16	0.294991	0.447234	0.0156	0.151945	0.516094
10950	BTG3	0.340471	0.516109	0.0356	0.234266	0.515868
159686	CCDC147	0.393328	0.59623	0.0044	0.0751742	0.515857
4736	RPL10A	0.255389	0.387033	0.0442	0.261175	0.515465
10003	NAALAD2	0.3174	0.480959	0.032	0.222612	0.515311
81572	PDRG1	0.220713	0.334441	0.0016	0.0402413	0.515276
54968	TMEM70	0.334227	0.506399	0.016	0.154936	0.515138
55885	LMO3	0.293162	0.44413	0.009	0.112164	0.514963
79147	FKRP	0.353817	0.535936	0.0196	0.171205	0.514728
8508	NIPSNAP1	0.232007	0.351415	0.0486	0.272588	0.514671
139760	GPR119	0.165536	0.250732	0.0124	0.134879	0.514665
51253	MRPL37	0.2323	0.351855	0.028	0.20641	0.514657
3781	KCNN2	0.169885	0.257314	0.06	0.302815	0.514636
90480	GADD45GIP1	0.237151	0.359193	0.0792	0.34479	0.514619
4148	MATN3	0.498252	0.754596	0.0396	0.247779	0.514488
9732	DOCK4	0.357611	0.541544	0.0332	0.227075	0.514336
115207	KCTD12	0.472971	0.716187	0.0548	0.288444	0.514231
11143	KAT7	0.153923	0.23307	0.0122	0.133751	0.5142
81035	COLEC12	0.33057	0.500503	0.0024	0.051974	0.51406
2135	EXTL2	0.329966	0.49956	0.0614	0.305717	0.513974
29880	ALG5	0.193899	0.293495	0.0304	0.216447	0.513648
3363	HTR7	0.175628	0.2658	0.0956	0.373595	0.51342
55761	TTC17	0.173618	0.262751	0.0036	0.0673737	0.51338
6419	SETMAR	0.138784	0.210032	0.0474	0.2693	0.51337
85479	DNAJC5B	0.346058	0.523676	0.025	0.195992	0.513258
7932	OR2H2	0.224853	0.340208	0	0	0.513027
8744	TNFSF9	0.368877	0.558053	0.0122	0.133751	0.512845
3811	KIR3DL1	0.2588	0.39151	0.0244	0.194025	0.512787
140880	CST11	0.420529	0.636166	0.0896	0.363081	0.512777
2170	FABP3	0.362156	0.54779	0.0338	0.229019	0.51258
10613	ERLIN1	0.242626	0.36699	0.04	0.248232	0.512578
10210	TOPORS	0.263549	0.398591	0.007	0.0969477	0.512399
255374	MBLAC1	0.306107	0.462946	0.001	0.0288495	0.512367
3590	IL11RA	0.189309	0.286281	0.0572	0.294841	0.512244
6675	UAP1	0.189291	0.286223	0.0038	0.0695554	0.512078
7058	THBS2	0.642477	0.971406	0.0262	0.200314	0.511971
10581	IFITM2	0.524187	0.792446	0.0102	0.12123	0.511764
51296	SLC15A3	0.226964	0.342934	0.0322	0.223351	0.510966
4232	MEST	0.176187	0.266197	0.0132	0.139664	0.51088
2243	FGA	0.200872	0.303485	0.0192	0.169846	0.510842
7019	TFAM	0.259796	0.392447	0.1144	0.410153	0.510592
10578	GNLY	0.204881	0.30948	0.025	0.195992	0.510534
161502	C15orf26	0.291072	0.439658	0.03	0.214332	0.510477
26751	SH3YL1	0.260434	0.393362	0.029	0.210708	0.510411
6367	CCL22	0.307323	0.464166	0.0328	0.225822	0.510353
29944	PNMA3	0.296872	0.448366	0.043	0.256906	0.510303
22996	TTC39A	0.340756	0.514618	0.0106	0.123519	0.510226
3960	LGALS4	0.335371	0.50641	0.0586	0.298733	0.509998
64816	CYP3A43	0.252192	0.38079	0.07	0.325139	0.509923
10694	CCT8	0.306118	0.462163	0.0014	0.0366484	0.509752
6817	SULT1A1	0.240593	0.363162	0.0398	0.247914	0.509445
2897	GRIK1	0.411113	0.6204	0.0038	0.0695554	0.509075
11321	GPN1	0.330715	0.499063	0.0036	0.0673737	0.509043
6654	SOS1	0.295648	0.446045	0.0166	0.158174	0.508701
57631	LRCH2	0.263249	0.397096	0.0072	0.0988148	0.50844
150051	LOC150051	0.238736	0.36009	0.0174	0.162546	0.508323
78988	MRP63	0.233254	0.351624	0.0088	0.11058	0.507472
23581	CASP14	0.255593	0.385276	0.2048	0.527419	0.507381
64343	AZI2	0.246489	0.371549	0.1768	0.495569	0.507365
57669	EPB41L5	0.329487	0.49664	0.0124	0.134879	0.507314
533	ATP6V0B	0.265655	0.400364	0.011	0.126152	0.507083
10574	CCT7	0.327613	0.493665	0.0064	0.0921589	0.506854
4638	MYLK	0.321997	0.485131	0.0168	0.15908	0.506633
23313	KIAA0930	0.245929	0.370511	0.0314	0.220461	0.506581
387640	C10orf140	0.161203	0.242839	0.061	0.305091	0.506416
165	AEBP1	0.558217	0.840802	0.0132	0.139664	0.506229
124599	CD300LB	0.183227	0.275931	0.1304	0.432118	0.505953
10350	ABCA9	0.278003	0.41862	0.0106	0.123519	0.50581
221786	FAM200A	0.33683	0.50716	0.0222	0.183897	0.505685
51761	ATP8A2	0.201176	0.30288	0.0124	0.134879	0.50555
29102	DROSHA	0.249089	0.375006	0.049	0.273727	0.505511
26184	OR1F2P	0.180564	0.271839	0.0254	0.197089	0.505504
4830	NME1	0.275573	0.414751	0.0054	0.0838408	0.505053
84867	PTPN5	0.260486	0.391981	0.0196	0.171205	0.504807
22866	CNKSR2	0.396057	0.595922	0.0178	0.163354	0.504639
23553	HYAL4	0.181169	0.272572	0.01	0.119706	0.504518
80256	FAM214B	0.184909	0.278193	0.1184	0.416787	0.504486
55048	VPS37C	0.175267	0.263662	0.0638	0.310799	0.504347
390226	GUCY2E	0.245605	0.369437	0.0684	0.321831	0.504193
7844	RNF103	0.253414	0.381142	0.0196	0.171205	0.504028
55970	GNG12	0.451011	0.678331	0.0114	0.129228	0.504023
9849	ZNF518A	0.273306	0.411021	0.0296	0.212567	0.503886
54758	KLHDC4	0.201618	0.303189	0.068	0.320582	0.503782
10023	FRAT1	0.294881	0.443251	0.0048	0.0790909	0.50315
113263	GLCCI1	0.389035	0.584775	0.008	0.104874	0.50314
9348	NDST3	0.417395	0.627392	0.0298	0.213451	0.503114
10057	ABCC5	0.227661	0.342191	0.0066	0.0932669	0.503075
26999	CYFIP2	0.150595	0.226355	0.0148	0.147602	0.503072
115653	KIR3DL3	0.191468	0.287777	0.1334	0.436422	0.503001
51751	HIGD1B	0.33392	0.501783	0.0372	0.239409	0.502703
5434	POLR2E	0.243005	0.365148	0.0242	0.193264	0.502633
79993	ELOVL7	0.522657	0.785332	0.0068	0.0951258	0.502576
9725	TMEM63A	0.429981	0.646025	0.029	0.210708	0.502451
170063	CXorf22	0.256717	0.385698	0.272	0.600265	0.502424
6128	RPL6	0.282679	0.424686	0.014	0.144283	0.502359
92211	CDHR1	0.521663	0.783691	0.0328	0.225822	0.502294
57547	ZNF624	0.18317	0.27517	0.0178	0.163354	0.50226
51298	THEG	0.165883	0.249177	0.0734	0.332775	0.502128
10049	DNAJB6	0.163132	0.245036	0.046	0.265783	0.502066
23230	VPS13A	0.33127	0.497503	0.0248	0.195805	0.501807
55196	C12orf35	0.23688	0.355737	0.0316	0.221306	0.501764
8674	VAMP4	0.245086	0.368048	0.04	0.248232	0.50171
158983	H2BFWT	0.283001	0.424905	0.009	0.112164	0.501428
200150	PLD5	0.258644	0.388327	0.055	0.288949	0.501397
2785	GNG3	0.419423	0.629719	0.0516	0.280179	0.501394
23149	FCHO1	0.234538	0.352082	0.003	0.0595536	0.501169
54827	FAM55D	0.245607	0.368646	0.039	0.24587	0.500959
90313	TP53I13	0.195701	0.293723	0.0078	0.103144	0.500875
220992	ZNF485	0.257021	0.385679	0.0496	0.27496	0.500577
2237	FEN1	0.217257	0.325943	0.0618	0.306154	0.500259
10900	RUNDC3A	0.331214	0.496875	0.0192	0.169846	0.500161
8926	SNURF	0.434894	0.652324	0.04	0.248232	0.49996
3765	KCNJ9	0.46348	0.695182	0.206	0.52939	0.499917
10565	ARFGEF1	0.293057	0.43952	0.0022	0.0495074	0.499779
1956	EGFR	0.243425	0.365083	0.0008	0.0250752	0.499777
6001	RGS10	0.511172	0.766586	0.0318	0.222147	0.499664
136288		0.212617	0.318812	0.035	0.23252	0.499463
8310	ACOX3	0.279128	0.418481	0.05	0.276351	0.499248
3032	HADHB	0.432378	0.648187	0.019	0.168883	0.499122
2892	GRIA3	0.363941	0.54548	0.0478	0.270192	0.498815
127294	MYOM3	0.248855	0.372957	0.0392	0.246478	0.498693
116085	SLC22A12	0.171206	0.256547	0.0098	0.118245	0.498473
221662	RBM24	0.367637	0.55081	0.0144	0.145616	0.498244
7329	UBE2I	0.124081	0.185893	0.0548	0.288444	0.498163
10897	YIF1A	0.205928	0.308449	0.0116	0.130784	0.497852
23426	GRIP1	0.266505	0.399183	0.0954	0.373426	0.497845
25876	SPEF1	0.366235	0.548487	0.0146	0.146748	0.497636
5550	PREP	0.267903	0.401149	0.0104	0.122819	0.497363
5957	RCVRN	0.330751	0.495231	0.0324	0.224365	0.497294
1634	DCN	0.296683	0.444076	0.039	0.24587	0.496802
116835	HSPA12B	0.299136	0.4477	0.0282	0.207335	0.496646
55216	C11orf57	0.203345	0.30425	0.0418	0.252908	0.496226
126282	TNFAIP8L1	0.241805	0.361793	0.0134	0.140975	0.496216
51107	APH1A	0.202812	0.303414	0.0272	0.203847	0.496033
51294	PCDH12	0.428764	0.641369	0.0084	0.108329	0.495856
50810	HDGFRP3	0.241199	0.360783	0.0184	0.165938	0.495792
27113	BBC3	0.205166	0.306847	0.0716	0.329088	0.495607
91768	CABLES1	0.221688	0.331501	0.0052	0.0820341	0.495349
83549	UCK1	0.216843	0.324247	0.1254	0.425875	0.495305
56269	IRGC	0.309233	0.462384	0.0526	0.282481	0.49526
165055	CCDC138	0.377989	0.56512	0.001	0.0288495	0.495072
283683	LOC283683	0.401948	0.600855	0.035	0.23252	0.494857
55011	PIH1D1	0.244679	0.365689	0.0286	0.20862	0.494564
5082	PDCL	0.166439	0.24873	0.0068	0.0951258	0.494423
3066	HDAC2	0.235474	0.351852	0.0242	0.193264	0.494225
1213	CLTC	0.438981	0.655911	0.0378	0.241223	0.494167
374354	NHLRC2	0.393447	0.587762	0.047	0.268491	0.493877
340156	MYLK4	0.29471	0.440248	0.1696	0.486928	0.493836
3691	ITGB4	0.275723	0.411858	0.0026	0.0546721	0.493735
6663	SOX10	0.26668	0.398339	0.0156	0.151945	0.493698
728882	FAM182B	0.521886	0.779455	0.0494	0.27449	0.493536
11188	NISCH	0.400652	0.598352	0.0004	0.0154398	0.493446
3679	ITGA7	0.194665	0.290684	0.001	0.0288495	0.493252
55719	FAM178A	0.286168	0.427234	0.0024	0.051974	0.492948
7010	TEK	0.469481	0.70091	0.022	0.183517	0.492945
255231	MCOLN2	0.357813	0.534192	0.1024	0.38693	0.492936
112840	WDR89	0.16131	0.240809	0.0726	0.331219	0.492835
55662	HIF1AN	0.183347	0.273683	0.0354	0.23378	0.492704
153364	MBLAC2	0.268398	0.400606	0.0192	0.169846	0.492583
678	ZFP36L2	0.593034	0.885108	0.01	0.119706	0.492507
51592	TRIM33	0.232037	0.346268	0.0194	0.17062	0.492298
1528	CYB5A	0.171374	0.255728	0.0478	0.270192	0.49222
57478	USP31	0.264902	0.39523	0.0118	0.13188	0.491984
5965	RECQL	0.209116	0.311982	0.099	0.381231	0.49191
7525	YES1	0.332107	0.495467	0.0596	0.301709	0.491889
4166	CHST6	0.389209	0.580645	0.0364	0.236728	0.491861
23350	U2SURP	0.206491	0.30803	0.0096	0.117103	0.491735
5327	PLAT	0.44445	0.663002	0.0018	0.0435631	0.491735
58528	RRAGD	0.153681	0.229243	0.0462	0.265925	0.491682
79465	ULBP3	0.277023	0.413178	0.0498	0.275794	0.491497
284123	FAM27L	0.274604	0.409551	0.15	0.461315	0.491428
285962	FLJ40852	0.246987	0.368344	0.025	0.195992	0.491349
7335	UBE2V1	0.381422	0.568729	0.0076	0.101465	0.491076
54815	GATAD2A	0.169262	0.252371	0.075	0.335828	0.49101
322	APBB1	0.201703	0.300614	0.0228	0.186734	0.490376
114788	CSMD3	0.264502	0.394179	0.035	0.23252	0.490273
866	SERPINA6	0.216405	0.322456	0.0222	0.183897	0.490057
51264	MRPL27	0.255993	0.381362	0.0062	0.090848	0.489736
337876	CHSY3	0.282696	0.42113	0.0222	0.183897	0.489692
55341	LSG1	0.285676	0.425541	0.003	0.0595536	0.489592
10172	ZNF256	0.316766	0.471851	0.0922	0.367895	0.489588
2295	FOXF2	0.302522	0.450607	0.0704	0.325727	0.489504
79846	C7orf63	0.489364	0.72891	0.0082	0.106658	0.489504
1845	DUSP3	0.26822	0.399409	0.0672	0.318612	0.489109
4661	MYT1	0.303015	0.45122	0.0102	0.12123	0.489105
348378	FAM159A	0.219153	0.32633	0.0262	0.200314	0.489052
10044	SH2D3C	0.147763	0.220014	0.0438	0.259547	0.488969
3280	HES1	0.514122	0.765496	0.1034	0.389033	0.48894
1535	CYBA	0.341187	0.507935	0.1266	0.427859	0.488729
2885	GRB2	0.174982	0.260487	0.0254	0.197089	0.488654
3107	HLA-C	0.60667	0.903078	0.02	0.172977	0.488581
9948	WDR1	0.200846	0.298952	0.0002	0.00928969	0.488463
84886	C1orf198	0.486398	0.723939	0.0744	0.335212	0.488366
54435	HCG4	0.622301	0.92611	0.1606	0.473648	0.488204
282809	POC1B	0.36851	0.54839	0.031	0.218943	0.488129
1114	CHGB	0.424526	0.631694	0.025	0.195992	0.487997
9839	ZEB2	0.279025	0.415173	0.053	0.283716	0.487945
6585	SLIT1	0.385115	0.573012	0.0882	0.360209	0.487899
3481	IGF2	0.357982	0.532494	0.041	0.250706	0.487488
159195	USP54	0.389013	0.578553	0.0324	0.224365	0.487234
4720	NDUFS2	0.310606	0.461944	0.1096	0.401754	0.487232
285525	YIPF7	0.249491	0.370972	0.0072	0.0988148	0.486914
374383	B7H6	0.257356	0.382648	0.0632	0.309504	0.486841
79673	ZNF329	0.213837	0.317875	0.0476	0.269793	0.486534
9372	ZFYVE9	0.14735	0.219022	0.0292	0.211149	0.486404
254910	LCE5A	0.160498	0.238526	0.2082	0.531659	0.486163
2554	GABRA1	0.39884	0.592547	0.0276	0.20482	0.485677
26574	AATF	0.253593	0.376751	0.1078	0.397428	0.485653
9469	CHST3	0.434073	0.64487	0.002	0.0467087	0.485625
23423	TMED3	0.230711	0.342676	0.008	0.104874	0.485302
5724	PTAFR	0.351239	0.521675	0.0752	0.336363	0.485241
57165	GJC2	0.229476	0.340822	0.0234	0.189599	0.485217
79176	FBXL15	0.219212	0.32555	0.07	0.325139	0.48509
23172	FAM175B	0.254664	0.378197	0.072	0.329835	0.485083
3681	ITGAD	0.178183	0.264552	0.1156	0.412063	0.484722
100507399	HCG8	0.311735	0.462673	0.0846	0.35356	0.484186
1513	CTSK	0.242874	0.36045	0.0088	0.11058	0.484104
92737	DNER	0.288034	0.427434	0.0446	0.261868	0.483969
283635	FAM177A1	0.294775	0.437384	0.1768	0.495569	0.483789
158431	ZNF782	0.309811	0.459675	0.0438	0.259547	0.483726
4129	MAOB	0.269727	0.400194	0.018	0.164286	0.483701
6558	SLC12A2	0.545417	0.809227	0.0168	0.15908	0.483686
8518	IKBKAP	0.186038	0.275992	0.0152	0.149799	0.483522
23187	PHLDB1	0.211745	0.314109	0.0648	0.313564	0.48343
11047	ADRM1	0.255458	0.378895	0.0116	0.130784	0.4832
196472	FAM71C	0.241407	0.358008	0.0266	0.201616	0.483008
116842	LEAP2	0.174539	0.258841	0.0056	0.0854346	0.482997
93973	ACTR8	0.206662	0.306442	0.0626	0.30765	0.482812
118611	C10orf90	0.362356	0.537258	0.0904	0.364816	0.482678
55267	C22orf26	0.1317	0.195241	0.0902	0.364273	0.482464
1877	E4F1	0.321109	0.475995	0.0512	0.279463	0.482348
6877	TAF5	0.297381	0.440819	0.0474	0.2693	0.482338
8556	CDC14A	0.274877	0.407409	0.0184	0.165938	0.482153
57619	SHROOM3	0.373592	0.553687	0.007	0.0969477	0.482063
22925	PLA2R1	0.237644	0.352134	0.0446	0.261868	0.481772
6834	SURF1	0.467718	0.692988	0.0726	0.331219	0.481636
10404	PGCP	0.385553	0.571232	0.0616	0.306154	0.48159
25956	SEC31B	0.188563	0.279353	0.0292	0.211149	0.481489
11016	ATF7	0.232703	0.344745	0.032	0.222612	0.48148
54583	EGLN1	0.289686	0.429138	0.0044	0.0751742	0.48139
57698	KIAA1598	0.359225	0.53215	0.0256	0.197538	0.481384
55191	NADSYN1	0.246201	0.364707	0.0034	0.0647203	0.481341
64779	MTHFSD	0.231795	0.343366	0.0098	0.118245	0.481337
125061	AFMID	0.174339	0.258244	0.036	0.235782	0.481278
79594	MUL1	0.179194	0.26538	0.106	0.393664	0.480968
55568	GALNT10	0.212432	0.314578	0.0676	0.319782	0.480844
29916	SNX11	0.1973	0.292151	0.0162	0.155967	0.48075
439921	MXRA7	0.314527	0.465733	0.0292	0.211149	0.480741
84290	CAPNS2	0.267362	0.395887	0.0502	0.276997	0.480714
203522	DDX26B	0.147167	0.217893	0.1376	0.443121	0.480587
100509445	LOC100509445	0.30326	0.448907	0.2172	0.542025	0.480272
4799	NFX1	0.135548	0.200607	0.0224	0.184728	0.479967
57502	NLGN4X	0.185125	0.273976	0.0174	0.162546	0.479949
7690	ZNF131	0.219361	0.324545	0.0064	0.0921589	0.479506
6125	RPL5	0.207614	0.30712	0.0028	0.0567315	0.479283
3663	IRF5	0.24617	0.364153	0.1198	0.418704	0.479277
129049	SGSM1	0.170904	0.252811	0.0946	0.371866	0.479252
57185	NIPAL3	0.245933	0.363699	0.094	0.370468	0.478855
148932	MOB3C	0.245818	0.363448	0.0482	0.27144	0.478522
80021	TMEM62	0.229993	0.339989	0.062	0.306326	0.478261
58475	MS4A7	0.417241	0.616485	0.0514	0.279731	0.477528
57404	CYP20A1	0.260791	0.385324	0.0004	0.0154398	0.477519
3006	HIST1H1C	0.496901	0.734132	0.0692	0.323886	0.477421
3283	HSD3B1	0.23724	0.350496	0.0486	0.272588	0.477393
285456	LOC285456	0.228302	0.337281	0.1122	0.406548	0.477348
256933	NPB	0.276956	0.409149	0.0804	0.34589	0.477306
10437	IFI30	0.579036	0.855223	0.0166	0.158174	0.476976
3762	KCNJ5	0.182962	0.270206	0.0764	0.338642	0.476842
23376	UFL1	0.340625	0.502973	0.0054	0.0838408	0.476616
84106	PRAM1	0.309098	0.456309	0.1038	0.389659	0.476259
389816	LRRC26	0.304429	0.449326	0.0232	0.188712	0.475964
10087	COL4A3BP	0.276224	0.407628	0.0568	0.293596	0.475717
254128	LOC254128	0.262584	0.387363	0.004	0.0717204	0.475198
284612	SYPL2	0.276221	0.407463	0.004	0.0717204	0.47513
253970	SFTA3	0.349128	0.514925	0.0644	0.312262	0.474889
158435	LOC158435	0.166125	0.245009	0.0968	0.37652	0.474843
51567	TDP2	0.243696	0.359409	0.0244	0.194025	0.474828
92304	SCGB3A1	0.433679	0.639601	0.0202	0.173537	0.474826
9659	PDE4DIP	0.402166	0.593095	0.0108	0.125062	0.474752
2321	FLT1	0.271751	0.40071	0.011	0.126152	0.474548
140576	S100A16	0.468381	0.690524	0.0122	0.133751	0.47428
267010	RNU12	0.330266	0.486794	0.0176	0.162773	0.473942
23387	SIK3	0.269408	0.397078	0.0228	0.186734	0.473891
23452	ANGPTL2	0.319419	0.470703	0.0266	0.201616	0.473621
1841	DTYMK	0.242992	0.358067	0.0554	0.289954	0.473576
144481	LOC144481	0.192219	0.28323	0.0038	0.0695554	0.473474
1298	COL9A2	0.31222	0.460015	0.0742	0.334945	0.473367
9439	MED23	0.247822	0.365117	0.0524	0.282408	0.473301
4850	CNOT4	0.285824	0.421087	0.0126	0.135814	0.473241
10861	SLC26A1	0.213609	0.314651	0.0328	0.225822	0.473025
11051	NUDT21	0.214799	0.316401	0.0256	0.197538	0.47301
84868	HAVCR2	0.45364	0.668187	0.0462	0.265925	0.472947
662	BNIP1	0.277395	0.408531	0.06	0.302815	0.472743
8439	NSMAF	0.206207	0.303682	0.032	0.222612	0.472707
7799	PRDM2	0.32808	0.483002	0.0016	0.0402413	0.472211
5827	PXMP2	0.229197	0.337351	0.168	0.484252	0.471883
11108	PRDM4	0.203933	0.30007	0.0058	0.0872092	0.471414
1982	EIF4G2	0.1836	0.270141	0.0332	0.227075	0.471356
642475	C8orf73	0.183104	0.269406	0.0284	0.207888	0.471325
375316	RBM44	0.297487	0.437694	0.091	0.365909	0.471304
7022	TFAP2C	0.296719	0.436556	0.0752	0.336363	0.471277
84976	DISP1	0.246068	0.362019	0.0604	0.304097	0.471218
57586	SYT13	0.272883	0.40146	0.0236	0.190571	0.471177
723961	INS-IGF2	0.218281	0.321049	0.1016	0.385128	0.470809
9935	MAFB	0.352276	0.518126	0.025	0.195992	0.470797
138311	FAM69B	0.217918	0.320497	0.0618	0.306154	0.470722
54914	KIAA1797	0.244504	0.359593	0.0234	0.189599	0.470706
10485	C1orf61	0.419657	0.61716	0.017	0.160246	0.470629
3959	LGALS3BP	0.336488	0.494771	0.03	0.214332	0.470397
26974	ZNF285	0.209608	0.308184	0.0118	0.13188	0.470287
5978	REST	0.36432	0.535569	0.0808	0.346538	0.47005
9287	TAAR2	0.252539	0.371228	0.0138	0.143732	0.469983
5739	PTGIR	0.259121	0.380815	0.0004	0.0154398	0.469643
3281	HSBP1	0.180583	0.265376	0.0082	0.106658	0.469554
55052	MRPL20	0.193484	0.284327	0.0042	0.0741111	0.469514
2212	FCGR2A	0.497483	0.731048	0.07	0.325139	0.469495
114823	LENG8	0.306078	0.449698	0.0152	0.149799	0.469228
80067	DCAF17	0.261318	0.383896	0.0256	0.197538	0.469076
1029	CDKN2A	0.187965	0.27612	0.0664	0.316983	0.468999
54205	CYCS	0.331718	0.487247	0.0278	0.205572	0.46886
6636	SNRPF	0.194096	0.285092	0.11	0.402336	0.468817
79838	TMC5	0.256674	0.377001	0.0284	0.207888	0.46879
7294	TXK	0.468173	0.687614	0.1184	0.416787	0.468719
25769	SLC24A2	0.2836	0.41651	0.0624	0.307391	0.468651
222659	PXT1	0.230248	0.338131	0.0188	0.167731	0.468555
283651	HMGN2P46	0.215986	0.317149	0.0372	0.239409	0.468382
121599	SPIC	0.249706	0.366663	0.001	0.0288495	0.468376
65251	ZNF649	0.304038	0.446414	0.0172	0.16131	0.468283
54665	RSBN1	0.39828	0.584753	0.04	0.248232	0.468196
7504	XK	0.337536	0.495538	0.0058	0.0872092	0.468103
93986	FOXP2	0.260689	0.382692	0.1412	0.448051	0.468001
118487	CHCHD1	0.200508	0.294339	0.0446	0.261868	0.467966
10591	C6orf108	0.192856	0.283102	0.039	0.24587	0.467947
22870	PPP6R1	0.245151	0.359808	0.1846	0.506367	0.467696
9783	RIMS3	0.362777	0.532352	0.0372	0.239409	0.467436
153830	RNF145	0.22998	0.337431	0.0294	0.21186	0.467218
3978	LIG1	0.176918	0.259571	0.0776	0.342051	0.467186
5803	PTPRZ1	0.420139	0.616257	0.0398	0.247914	0.466792
10936	GPR75	0.401133	0.588322	0.0406	0.249817	0.466653
54946	SLC41A3	0.232862	0.341511	0.0072	0.0988148	0.466582
100129716	LOC100129716	0.247565	0.363007	0.0176	0.162773	0.466307
3795	KHK	0.126671	0.185678	0.0174	0.162546	0.465831
4257	MGST1	0.472234	0.69215	0.169	0.485959	0.465693
2001	ELF5	0.117443	0.172092	0.1882	0.509371	0.465329
22909	FAN1	0.727306	1.06565	0.0222	0.183897	0.465198
55576	STAB2	0.259925	0.380824	0.0838	0.351892	0.465129
6299	SALL1	0.238662	0.349665	0.014	0.144283	0.465106
390201	OR10V1	0.291315	0.426781	0.0854	0.354505	0.465017
1896	EDA	0.364364	0.533782	0.0558	0.291043	0.464971
8689	KRT36	0.325125	0.476147	0.0154	0.150878	0.464507
57569	ARHGAP20	0.483277	0.707673	0.014	0.144283	0.464323
5279	PIGC	0.199889	0.292694	0.0494	0.27449	0.464278
57685	CACHD1	0.355025	0.519824	0.0018	0.0435631	0.464189
93349	SP140L	0.236402	0.346126	0.0162	0.155967	0.464137
22887	FOXJ3	0.19745	0.289071	0.0144	0.145616	0.46402
50632	CALY	0.197924	0.289712	0.0608	0.304823	0.463752
9882	TBC1D4	0.317564	0.464815	0.0004	0.0154398	0.463691
2835	GPR12	0.240187	0.351539	0.061	0.305091	0.463606
51524	TMEM138	0.211262	0.309201	0.0222	0.183897	0.463591
389203	C4orf52	0.259845	0.380297	0.0176	0.162773	0.463554
27304	MOCS3	0.244987	0.358508	0.1272	0.428584	0.463376
10874	NMU	0.653398	0.956028	0.019	0.168883	0.463163
23412	COMMD3	0.263914	0.386043	0.0172	0.16131	0.46276
80206	FHOD3	0.309727	0.452997	0.0814	0.347503	0.462567
3667	IRS1	0.349608	0.511325	0.032	0.222612	0.462564
3480	IGF1R	0.223519	0.326803	0.0872	0.358673	0.462081
6124	RPL4	0.187852	0.274627	0.0916	0.366906	0.461934
6189	RPS3A	0.311109	0.454598	0.0334	0.227603	0.461217
55689	YEATS2	0.246329	0.359933	0.0494	0.27449	0.461186
7561	ZNF14	0.236778	0.34596	0.0322	0.223351	0.461115
11211	FZD10	0.346682	0.50654	0.0272	0.203847	0.461109
7216	TRO	0.267854	0.39134	0.0076	0.101465	0.461022
286077	FAM83H	0.215056	0.314193	0.0608	0.304823	0.460982
10953	TOMM34	0.258139	0.37713	0.0864	0.356614	0.460959
55554	KLK15	0.28818	0.420929	0.067	0.318298	0.460646
9705	ST18	0.623902	0.911276	0.0566	0.293016	0.460608
2832	NPBWR2	0.255557	0.37323	0.0266	0.201616	0.460458
5888	RAD51	0.189606	0.27691	0.0226	0.186009	0.460449
10221	TRIB1	0.446739	0.65241	0.0426	0.255615	0.460381
5440	POLR2K	0.330958	0.483274	0.1038	0.389659	0.460225
3148	HMGB2	0.294821	0.430441	0.0054	0.0838408	0.46001
11194	ABCB8	0.256078	0.373876	0.0188	0.167731	0.460008
10174	SORBS3	0.204275	0.298221	0.0532	0.283966	0.459904
80895	ILKAP	0.155873	0.227553	0.1332	0.436025	0.459856
4585	MUC4	0.171472	0.250322	0.0844	0.353256	0.459841
51726	DNAJB11	0.236085	0.344628	0.0016	0.0402413	0.459764
4211	MEIS1	0.247977	0.361921	0.043	0.256906	0.459496
7444	VRK2	0.276082	0.402903	0.0066	0.0932669	0.45936
72	ACTG2	0.515194	0.751828	0.0204	0.174715	0.459309
26507	CNNM1	0.354758	0.517676	0.077	0.340396	0.459237
100653009	LOC100653009	0.498886	0.727918	0.1234	0.423743	0.459086
442454	UQCRBP1	0.200763	0.292913	0.0046	0.0769358	0.459001
1795	DOCK3	0.263247	0.384075	0.026	0.199701	0.45899
9181	ARHGEF2	0.34543	0.503976	0.0134	0.140975	0.458983
23200	ATP11B	0.225328	0.328726	0.0372	0.239409	0.458879
283596	SNHG10	0.226976	0.331119	0.0068	0.0951258	0.458828
55711	FAR2	0.386213	0.563356	0.0258	0.198439	0.458667
340542	BEX5	0.292639	0.42684	0.0408	0.250401	0.458591
3632	INPP5A	0.291963	0.425776	0.0934	0.369588	0.458326
387267	KRTAP5-4	0.177845	0.259303	0.0452	0.263535	0.458029
114781	BTBD9	0.152456	0.222256	0.015	0.148884	0.457833
10576	CCT2	0.28719	0.418603	0.0364	0.236728	0.457584
113457	TUBA3D	0.157828	0.230046	0.081	0.347039	0.457577
54331	GNG2	0.475251	0.692706	0.012	0.133045	0.457558
89832	CHRFAM7A	0.378873	0.552224	0.0198	0.17214	0.457544
3136	HLA-H	0.292973	0.426992	0.0782	0.343219	0.457445
6879	TAF7	0.223819	0.3262	0.1054	0.39266	0.457427
8867	SYNJ1	0.159571	0.232552	0.089	0.36197	0.457354
10147	SUGP2	0.148492	0.216402	0.0116	0.130784	0.457326
57722	IGDCC4	0.63897	0.931108	0.0006	0.0205441	0.457202
8092	ALX1	0.251434	0.366375	0.0402	0.248641	0.457139
10465	PPIH	0.265318	0.386473	0.0854	0.354505	0.456641
54793	KCTD9	0.274635	0.40003	0.0184	0.165938	0.456586
51024	FIS1	0.3001	0.437077	0.0122	0.133751	0.45644
115416	C7orf30	0.22368	0.325733	0.0992	0.381231	0.456245
125058	TBC1D16	0.341961	0.497978	0.17	0.487154	0.456241
284349	ZNF283	0.385204	0.560924	0.0638	0.310799	0.456176
83795	KCNK16	0.208069	0.302955	0.0364	0.236728	0.456027
55906	ZC4H2	0.171266	0.24931	0.069	0.323832	0.455692
118460	EXOSC6	0.25135	0.365803	0.0618	0.306154	0.455352
9753	ZSCAN12	0.327341	0.476288	0.1188	0.417402	0.45502
8531	CSDA	0.524381	0.762975	0.1256	0.426207	0.455002
255239	ANKK1	0.39123	0.569236	0.0634	0.309846	0.454989
100529215	ZNF559-ZNF177	0.225741	0.328378	0.0286	0.20862	0.45467
9796	PHYHIP	0.496553	0.722294	0.0162	0.155967	0.454616
6649	SOD3	0.31633	0.46012	0.0724	0.330759	0.454558
79770	TXNDC15	0.295893	0.430273	0.063	0.308887	0.45415
64167	ERAP2	1.15685	1.68139	0.0002	0.00928969	0.453421
90121	TSR2	0.249763	0.362964	0.0304	0.216447	0.453233
11187	PKP3	0.257229	0.373787	0.0386	0.244457	0.45313
6623	SNCG	0.370634	0.538563	0.0596	0.301709	0.453088
51716	CES1P1	0.280217	0.407149	0.1504	0.461694	0.45298
56898	BDH2	0.484909	0.704509	0.0024	0.051974	0.45287
5551	PRF1	0.387022	0.562279	0.0838	0.351892	0.452834
5805	PTS	0.323572	0.47006	0.0876	0.35952	0.452722
1595	CYP51A1	0.154584	0.22456	0.0462	0.265925	0.452678
6525	SMTN	0.214299	0.311259	0.0214	0.180498	0.452452
6297	SALL2	0.258842	0.375944	0.067	0.318298	0.452406
56265	CPXM1	0.431241	0.626321	0.0484	0.272107	0.452366
56951	C5orf15	0.288041	0.418335	0.014	0.144283	0.452347
8611	PPAP2A	0.293736	0.42658	0.024	0.19296	0.452257
58503	PROL1	0.252977	0.367293	0.0074	0.100077	0.45188
10765	KDM5B	0.240423	0.349047	0.0354	0.23378	0.451804
5905	RANGAP1	0.210711	0.305868	0.0352	0.233477	0.451597
26276	VPS33B	0.220878	0.320625	0.2244	0.550761	0.451593
5890	RAD51B	0.13343	0.193684	0.0356	0.234266	0.451582
3699	ITIH3	0.291608	0.423236	0.043	0.256906	0.451387
84504	NKX6-2	0.434203	0.630186	0.0186	0.166929	0.451365
146433	IL34	0.164627	0.238918	0.0842	0.352684	0.451268
8496	PPFIBP1	0.19016	0.275944	0.042	0.25375	0.451115
158800	RHOXF1	0.529595	0.768431	0.0252	0.19682	0.450979
11101	ATE1	0.206958	0.300276	0.032	0.222612	0.450905
151963	MB21D2	0.344366	0.499605	0.012	0.133045	0.450796
393046	OR2A5	0.267679	0.38834	0.0848	0.353598	0.450769
27124	INPP5J	0.333344	0.483603	0.0106	0.123519	0.450762
1945	EFNA4	0.191731	0.278152	0.0354	0.23378	0.450743
79742	CXorf36	0.11221	0.162747	0.0706	0.32629	0.450382
9429	ABCG2	0.580418	0.841819	0.1198	0.418704	0.450366
55071	C9orf40	0.247776	0.359245	0.0778	0.342571	0.44988
84759	PCGF1	0.265131	0.384402	0.0564	0.292617	0.449855
7391	USF1	0.188227	0.272844	0.0794	0.34479	0.449546
348093	RBPMS2	0.25185	0.365067	0.0902	0.364273	0.449539
55521	TRIM36	0.338774	0.491052	0.1296	0.431181	0.449495
654322	SNORA13	0.267623	0.387896	0.1106	0.403469	0.449413
342357	ZKSCAN2	0.235216	0.340919	0.0744	0.335212	0.449385
25984	KRT23	0.180693	0.261863	0.0322	0.223351	0.449216
7881	KCNAB1	0.166561	0.24137	0.1016	0.385128	0.44914
146206	RLTPR	0.208336	0.301863	0.0662	0.316481	0.448923
390790	ARL5C	0.180517	0.261519	0.0234	0.189599	0.448723
975	CD81	0.271577	0.393429	0.065	0.313894	0.448684
55294	FBXW7	0.401335	0.581379	0.0506	0.277917	0.448613
54566	EPB41L4B	0.149539	0.216617	0.0262	0.200314	0.448569
80258	EFHC2	0.253324	0.366954	0.0824	0.349179	0.448557
3918	LAMC2	0.145798	0.211189	0.064	0.311409	0.448506
56751	BARHL1	0.401912	0.582139	0.0382	0.242846	0.448424
171546	SPTSSA	0.222374	0.32203	0.0238	0.191908	0.448147
147650	LINC00085	0.245156	0.355021	0.0464	0.266616	0.44814
66005	CHID1	0.137548	0.199183	0.017	0.160246	0.448093
23552	CDK20	0.127352	0.184392	0.0096	0.117103	0.447887
50624	CUZD1	0.325897	0.471832	0.0412	0.251008	0.447797
94030	LRRC4B	0.186359	0.269805	0.0196	0.171205	0.447775
6193	RPS5	0.235611	0.341064	0.0254	0.197089	0.44757
6635	SNRPE	0.215711	0.31224	0.0156	0.151945	0.447494
7857	SCG2	0.542189	0.784805	0.0084	0.108329	0.447476
5770	PTPN1	0.28658	0.414789	0.1686	0.485478	0.447377
29967	LRP12	0.290941	0.421003	0.019	0.168883	0.447039
1431	CS	0.207692	0.300516	0	0	0.446931
85406	DNAJC14	0.186115	0.269292	0.0382	0.242846	0.446907
3439	IFNA1	0.19572	0.28318	0.0736	0.333047	0.446866
284348	LYPD5	0.36218	0.524025	0.0558	0.291043	0.446863
2676	GFRA3	0.265471	0.384091	0.0098	0.118245	0.446832
53373	TPCN1	0.261221	0.377893	0.0038	0.0695554	0.446637
887	CCKBR	0.215416	0.311624	0.0074	0.100077	0.446616
9857	CEP350	0.35402	0.512118	0.0606	0.304461	0.446579
51703	ACSL5	0.195021	0.282112	0.1148	0.410704	0.446571
54064	LINC00160	0.241427	0.349206	0.0178	0.163354	0.446425
10186	LHFP	0.199597	0.28869	0.0546	0.287936	0.446368
25999	CLIP3	0.351431	0.508275	0.203	0.526225	0.446304
5208	PFKFB2	0.175387	0.253628	0.1208	0.419742	0.446106
7454	WAS	0.468088	0.676873	0.0028	0.0567315	0.446038
55798	METTL2B	0.409585	0.592267	0.063	0.308887	0.446017
4832	NME3	0.246383	0.356258	0.0178	0.163354	0.445948
29887	SNX10	0.283212	0.409499	0.067	0.318298	0.445907
9615	GDA	0.342373	0.495031	0.072	0.329835	0.445884
1113	CHGA	0.342294	0.494707	0.1428	0.450898	0.445271
64375	IKZF4	0.38797	0.560697	0.037	0.23886	0.445205
221002	RASGEF1A	0.244965	0.354024	0.0522	0.281877	0.445203
7042	TGFB2	0.137869	0.199221	0.182	0.503011	0.445002
10247	HRSP12	0.328751	0.475032	0.0146	0.146748	0.444961
10004	NAALADL1	0.297172	0.429365	0.08	0.345506	0.444836
8331	HIST1H2AJ	0.238535	0.344642	0.1474	0.457623	0.444829
203068	TUBB	0.25794	0.372631	0.0364	0.236728	0.444639
79183	TTPAL	0.261488	0.377728	0.1726	0.490809	0.444537
131920	TMEM207	0.272447	0.393502	0.1376	0.443121	0.444328
5579	PRKCB	0.372551	0.537942	0.0744	0.335212	0.443944
6924	TCEB3	0.216257	0.312251	0.1234	0.423743	0.443886
6601	SMARCC2	0.163683	0.236336	0.1174	0.415107	0.443866
6696	SPP1	0.919374	1.3274	0.0362	0.236164	0.443806
55127	HEATR1	0.323242	0.46665	0.088	0.360209	0.443656
4677	NARS	0.244866	0.35346	0.0802	0.345743	0.443483
10885	WDR3	0.262885	0.379442	0.1616	0.47475	0.443377
9118	INA	0.256512	0.370242	0.0412	0.251008	0.44337
100169755	RN5S4	0.263363	0.380043	0.0612	0.305359	0.44304
114088	TRIM9	0.331272	0.47799	0.0108	0.125062	0.44289
22981	NINL	0.23317	0.336368	0.1792	0.499442	0.442585
3320	HSP90AA1	0.131235	0.189277	0.1312	0.432791	0.442278
26788	SNORD60	0.345274	0.49793	0.0158	0.153356	0.442132
64344	HIF3A	0.236446	0.340984	0.0318	0.222147	0.442119
22979	EFR3B	0.224689	0.324028	0.0616	0.306154	0.442118
23768	FLRT2	0.401367	0.578813	0.0598	0.302263	0.442103
3175	ONECUT1	0.268592	0.387329	0.172	0.489688	0.442075
25793	FBXO7	0.311471	0.449052	0.0526	0.282481	0.441711
7869	SEMA3B	0.378926	0.546284	0.0224	0.184728	0.441663
2259	FGF14	0.215553	0.310743	0.1572	0.469937	0.441606
892	CCNC	0.375895	0.541856	0.0748	0.335654	0.441509
391195	OR2T33	0.230113	0.331681	0.0314	0.220461	0.441383
224	ALDH3A2	0.383824	0.553201	0.0694	0.323886	0.441286
89801	PPP1R3F	0.188501	0.271674	0.0578	0.296558	0.441238
146330	FBXL16	0.270004	0.38911	0.0638	0.310799	0.441123
29889	GNL2	0.241465	0.347913	0.0232	0.188712	0.440843
11078	TRIOBP	0.187916	0.27075	0.092	0.367625	0.440801
816	CAMK2B	0.186806	0.269112	0.175	0.493844	0.440593
29117	BRD7	0.157107	0.226317	0.004	0.0717204	0.44053
7200	TRH	0.464858	0.669584	0.0306	0.217222	0.440407
352887	GYG2P1	0.347858	0.501008	0.0294	0.21186	0.440265
8541	PPFIA3	0.187188	0.269566	0.0772	0.341009	0.440081
3061	HCRTR1	0.186141	0.26804	0.0806	0.345947	0.439981
22834	ZNF652	0.495699	0.713791	0.0256	0.197538	0.439969
1757	SARDH	0.157317	0.226504	0.0028	0.0567315	0.439789
25798	BRI3	0.241191	0.347237	0.0478	0.270192	0.439673
10672	GNA13	0.292748	0.421432	0.0452	0.263535	0.439573
10791	VAMP5	0.257778	0.371074	0.0518	0.280808	0.439508
134510	UBLCP1	0.314325	0.45246	0.072	0.329835	0.439469
6217	RPS16	0.193393	0.278378	0.0734	0.332775	0.43944
29896	TRA2A	0.266749	0.383965	0.0916	0.366906	0.439423
3834	KIF25	0.371165	0.534245	0.0998	0.382391	0.439374
728780	ANKDD1B	0.225437	0.32448	0.1044	0.39068	0.439336
182	JAG1	0.357529	0.514595	0.0828	0.349719	0.43931
5883	RAD9A	0.204632	0.294465	0.0412	0.251008	0.438995
9700	ESPL1	0.251511	0.361917	0.0526	0.282481	0.438968
23259	DDHD2	0.320427	0.460951	0.0712	0.327972	0.438556
63894	C14orf133	0.182087	0.261936	0.0244	0.194025	0.438524
199	AIF1	0.208984	0.300601	0.059	0.300038	0.438397
27133	KCNH5	0.406267	0.5843	0.0694	0.323886	0.438217
79731	NARS2	0.309509	0.445092	0.0732	0.332139	0.438058
150596	FLJ32955	0.236604	0.340243	0.038	0.242036	0.43803
143689	PIWIL4	0.37628	0.541091	0.1442	0.453344	0.438002
3752	KCND3	0.169931	0.24434	0.0552	0.289453	0.437875
128308	MRPL55	0.167412	0.240708	0.0714	0.328531	0.43782
115098	CCDC124	0.255425	0.367203	0.0264	0.201014	0.437616
2300	FOXL1	0.183319	0.263523	0.0314	0.220461	0.437508
23593	HEBP2	0.388014	0.557749	0.1086	0.39879	0.437445
25839	COG4	0.240315	0.345439	0.0386	0.244457	0.437443
23211	ZC3H4	0.223816	0.32171	0.0286	0.20862	0.437387
55278	QRSL1	0.231065	0.332097	0.075	0.335828	0.437246
100132356	LOC100132356	0.427962	0.61501	0.0386	0.244457	0.437067
80221	ACSF2	0.523735	0.75246	0.0782	0.343219	0.436719
26001	RNF167	0.228043	0.327624	0.0498	0.275794	0.436676
285958	SNHG15	0.23616	0.339166	0.0506	0.277917	0.436169
122769	LRR1	0.192031	0.275777	0.0582	0.297512	0.436106
553158	PRR5-ARHGAP8	0.300531	0.431439	0.0372	0.239409	0.435592
6521	SLC4A1	0.187599	0.269288	0.0936	0.369941	0.435446
10206	TRIM13	0.180191	0.258637	0.0142	0.144469	0.435352
200350	FOXD4L1	0.200118	0.287217	0.0414	0.251492	0.435238
1645	AKR1C1	0.564827	0.810576	0.013	0.138958	0.435088
389549	FEZF1	0.207603	0.297923	0.0146	0.146748	0.43506
9770	RASSF2	0.417037	0.598468	0.0262	0.200314	0.435048
84679	SLC9A7	0.139331	0.199939	0.0538	0.285524	0.434993
5708	PSMD2	0.204539	0.293485	0.0298	0.213451	0.434861
3240	HP	0.384443	0.551545	0.108	0.397462	0.434659
283464	GXYLT1	0.225334	0.32327	0.049	0.273727	0.434626
100033815	SNORD115-41	0.642623	0.921853	0.0274	0.20461	0.434516
57696	DDX55	0.261182	0.374554	0.2592	0.587889	0.434072
9825	SPATA2	0.299396	0.429333	0.0162	0.155967	0.433997
100128076	LOC100128076	0.275794	0.395457	0.0618	0.306154	0.433884
25836	NIPBL	0.204306	0.292928	0.0254	0.197089	0.433773
83987	CCDC8	0.384379	0.550977	0.0336	0.228313	0.433422
9854	C2CD2L	0.243033	0.34835	0.0398	0.247914	0.433342
9677	PPIP5K1	0.249286	0.357295	0.06	0.302815	0.43327
8325	FZD8	0.612568	0.877732	0.0796	0.34494	0.432873
3547	IGSF1	0.13845	0.198353	0.0656	0.315239	0.432673
1280	COL2A1	0.182413	0.261304	0.0854	0.354505	0.432484
2645	GCK	0.228446	0.327233	0.0762	0.338115	0.432429
353139	LCE2A	0.224913	0.322166	0.053	0.283716	0.432403
51617	HMP19	0.182093	0.260801	0.0844	0.353256	0.432242
267002	PGBD2	0.284924	0.408052	0.0488	0.273159	0.432142
60686	C14orf93	0.274461	0.393005	0.1168	0.414215	0.431919
29982	NRBF2	0.174233	0.249439	0.078	0.342998	0.431642
4213	MEIS3P1	0.291223	0.416779	0.0788	0.344247	0.431132
55721	IQCC	0.291122	0.416609	0.0784	0.343219	0.431046
8555	CDC14B	0.346958	0.496468	0.0228	0.186734	0.430916
9767	PHF16	0.392009	0.560849	0.035	0.23252	0.430705
79369	B3GNT4	0.19918	0.284936	0.0118	0.13188	0.430547
23543	RBFOX2	0.35684	0.510418	0.0346	0.231523	0.430385
100507589	LOC100507589	0.280824	0.401628	0.1204	0.419225	0.430179
60681	FKBP10	0.232895	0.333076	0.0308	0.217992	0.430159
1287	COL4A5	0.520901	0.744961	0.0982	0.379487	0.430139
84542	KIAA1841	0.470467	0.672784	0.1076	0.396954	0.430036
140564	APOBEC3D	0.171349	0.245024	0.0636	0.310278	0.429973
55744	C7orf44	0.20797	0.297359	0.0078	0.103144	0.429822
23766	GABARAPL3	0.27736	0.396575	0.1108	0.403845	0.42982
255725	OR52B2	0.217283	0.31063	0.0514	0.279731	0.429611
149499	LRRC71	0.204608	0.292456	0.0392	0.246478	0.429351
23646	PLD3	0.272931	0.390097	0.1072	0.396567	0.429289
22822	PHLDA1	0.203258	0.290505	0.036	0.235782	0.429244
83714	NRIP2	0.318058	0.454563	0.0182	0.165207	0.429183
4151	MB	0.15901	0.22725	0.0462	0.265925	0.429152
6777	STAT5B	0.302721	0.432615	0.0812	0.347449	0.429087
160428	ALDH1L2	0.19517	0.278863	0.041	0.250706	0.42882
7596	ZNF45	0.190256	0.271817	0.1346	0.43837	0.428685
7942	TFEB	0.36994	0.528505	0.0162	0.155967	0.428623
677836	SNORA58	0.336562	0.480781	0.0044	0.0751742	0.428507
147111	NOTUM	0.459662	0.656601	0.055	0.288949	0.428442
84668	FAM126A	0.411182	0.587307	0.0634	0.309846	0.428339
6098	ROS1	0.461393	0.658968	0.0712	0.327972	0.428213
3977	LIFR	0.373081	0.532768	0.0556	0.290363	0.428024
576	BAI2	0.1477	0.210919	0.1548	0.466273	0.428023
22980	TCF25	0.177799	0.253828	0.0228	0.186734	0.427614
55036	CCDC40	0.48873	0.697549	0.0832	0.350255	0.427268
5879	RAC1	0.152049	0.217012	0.0476	0.269793	0.427248
79178	THTPA	0.25385	0.362178	0.0934	0.369588	0.426741
10570	DPYSL4	0.218383	0.311546	0.026	0.199701	0.426603
23097	CDK19	0.375085	0.535069	0.0824	0.349179	0.426527
81624	DIAPH3	0.361184	0.515227	0.139	0.444624	0.426496
58985	IL22RA1	0.256653	0.366101	0.0934	0.369588	0.426445
7480	WNT10B	0.304982	0.434988	0.0658	0.315745	0.426277
79015	LOC79015	0.600426	0.856307	0.035	0.23252	0.426167
221424	LRRC73	0.348106	0.496452	0.1234	0.423743	0.426151
440518	LOC440518	0.292933	0.417718	0.06	0.302815	0.425986
133584	EGFLAM	0.120209	0.171415	0.0774	0.34135	0.425975
29915	HCFC2	0.303619	0.432952	0.0164	0.157076	0.425972
9818	NUPL1	0.292566	0.417159	0.0574	0.295506	0.425863
255189	PLA2G4F	0.228199	0.325376	0.0852	0.354469	0.425844
11062	DUS4L	0.279485	0.398479	0.1146	0.41034	0.425762
23647	ARFIP2	0.252545	0.359994	0.0148	0.147602	0.425469
64753	CCDC136	0.266173	0.379352	0.008	0.104874	0.425205
582	BBS1	0.206522	0.294335	0.0462	0.265925	0.425195
6725	SRMS	0.200054	0.285078	0.0354	0.23378	0.425005
10899	JTB	0.196581	0.280115	0.1222	0.422056	0.424931
284900	TTC28-AS1	0.257574	0.367012	0.1728	0.491127	0.424883
3111	HLA-DOA	0.5429	0.773392	0.1272	0.428584	0.424557
3792	KEL	0.308365	0.439217	0.0586	0.298733	0.424342
11184	MAP4K1	0.278753	0.397014	0.041	0.250706	0.42425
10380	BPNT1	0.311798	0.444054	0.049	0.273727	0.424172
84327	ZBED3	0.462793	0.659079	0.0672	0.318612	0.424134
84916	CIRH1A	0.232655	0.331303	0.0686	0.32259	0.424008
51704	GPRC5B	0.431874	0.614904	0.1256	0.426207	0.423803
8796	SCEL	0.241366	0.343628	0.0586	0.298733	0.423681
100526693	ARPC4-TTLL3	0.263031	0.374394	0.0924	0.367989	0.423383
138050	HGSNAT	0.291505	0.414879	0.0226	0.186009	0.423234
151449	GDF7	0.190743	0.271447	0.248	0.576443	0.4231
6147	RPL23A	0.209147	0.297635	0.0904	0.364816	0.423089
51379	CRLF3	0.25247	0.359247	0.0728	0.33195	0.422931
9678	PHF14	0.296175	0.421403	0.0064	0.0921589	0.422817
197131	UBR1	0.250144	0.355888	0.106	0.393664	0.422734
9824	ARHGAP11A	0.240551	0.342228	0.1026	0.38751	0.422684
6166	RPL36AL	0.251302	0.357479	0.1368	0.442596	0.422509
10772	SRSF10	0.275937	0.392507	0.0278	0.205572	0.422453
84197	SGK196	0.205832	0.292764	0.1012	0.384486	0.422343
219402	MTIF3	0.327505	0.465818	0.116	0.413047	0.422324
100652766	LOC100652766	0.332274	0.472574	0.085	0.354167	0.422242
5139	PDE3A	0.262457	0.373273	0.0626	0.30765	0.422225
1749	DLX5	0.325533	0.462914	0.0874	0.359141	0.422019
57453	DSCAML1	0.218183	0.310216	0.036	0.235782	0.421816
84898	PLXDC2	0.44199	0.628428	0.0456	0.264388	0.421813
4325	MMP16	0.220681	0.313735	0.0602	0.303457	0.421668
2710	GK	0.207301	0.294707	0.091	0.365909	0.42164
5654	HTRA1	0.359559	0.511144	0.0462	0.265925	0.421583
56704	JPH1	0.325978	0.463352	0.0516	0.280179	0.42142
56132	PCDHB3	0.520829	0.740287	0.0272	0.203847	0.421364
5476	CTSA	0.204301	0.290384	0.0762	0.338115	0.421356
4160	MC4R	0.449197	0.63841	0.0732	0.332139	0.421225
126119	JOSD2	0.177859	0.25277	0.016	0.154936	0.421178
403315	FAM92A3	0.245375	0.348707	0.077	0.340396	0.421121
3823	KLRC3	0.566601	0.805205	0.0008	0.0250752	0.421114
818	CAMK2G	0.176645	0.251032	0.112	0.406177	0.421112
80274	SCUBE1	0.286774	0.407529	0.0966	0.376268	0.421078
90407	TMEM41A	0.183247	0.260395	0.0398	0.247914	0.421004
64431	ACTR6	0.274062	0.389355	0.3024	0.631341	0.420681
9868	TOMM70A	0.298109	0.423515	0.0044	0.0751742	0.420669
647087	C7orf73	0.253351	0.359922	0.0158	0.153356	0.420648
79891	ZNF671	0.237212	0.336929	0.1698	0.486999	0.42037
5382	PMS2P4	0.250223	0.355392	0.0452	0.263535	0.420299
10693	CCT6B	0.555703	0.789253	0.0146	0.146748	0.420279
55070	DET1	0.26581	0.377447	0.063	0.308887	0.419987
7716	VEZF1	0.297389	0.422241	0.06	0.302815	0.419827
[truncated: 14,676 more rows]

## Sheet: sva
Entrez_Gene_ID	Gene_Symbol	IQR_young(mean)	IQR_old	p.value	p.adjust_fdr	Δvar(IQR)
10538	BATF	0.104448	0.282992	0	0	1.70942
50836	TAS2R8	0.145313	0.390719	0	0	1.68881
201191	SAMD14	0.157489	0.415725	0	0	1.6397
6307	MSMO1	0.266397	0.689895	0	0	1.58973
84792	C7orf70	0.0798158	0.204851	0	0	1.56655
100526832	PHOSPHO2-KLHL23	0.146466	0.37341	0	0	1.54946
11019	LIAS	0.14349	0.363628	0	0	1.53418
2550	GABBR1	0.0644755	0.161842	0	0	1.51014
388125	C2CD4B	0.22229	0.554514	0	0	1.49455
100506564	LOC100506564	0.154609	0.375513	0	0	1.42879
55339	WDR33	0.147601	0.356815	0	0	1.41743
5027	P2RX7	0.23792	0.573884	0	0	1.41209
171023	ASXL1	0.0822699	0.198299	0	0	1.41035
2300	FOXL1	0.126479	0.301806	0	0	1.38622
3373	HYAL1	0.109326	0.260636	0	0	1.38403
6489	ST8SIA1	0.124569	0.294034	0	0	1.36042
5836	PYGL	0.158583	0.372424	0	0	1.34846
55159	RFWD3	0.135529	0.316752	0	0	1.33716
390084	OR56A5	0.170945	0.398611	0	0	1.33181
163223	ZNF676	0.26243	0.611696	0.0004	0.0154398	1.33089
280636	C11orf31	0.0948993	0.219925	0	0	1.31745
146212	KCTD19	0.175025	0.403608	0	0	1.306
90673	PPP1R3E	0.136136	0.313345	0	0	1.3017
1409	CRYAA	0.18531	0.426409	0	0	1.30105
100506301	LOC100506301	0.193859	0.444768	0	0	1.29428
55733	HHAT	0.21428	0.490043	0	0	1.28693
22926	ATF6	0.143255	0.327444	0	0	1.28574
5465	PPARA	0.150262	0.341489	0	0	1.27262
150946	FAM59B	0.222789	0.503594	0	0	1.2604
65975	STK33	0.224684	0.507747	0	0	1.25983
83642	SELO	0.144688	0.32589	0	0	1.25237
3741	KCNA5	0.209987	0.472451	0	0	1.2499
55691	FRMD4A	0.100043	0.224404	0	0	1.24308
306	ANXA3	0.287746	0.640802	0	0	1.22697
57805	KIAA1967	0.088941	0.197697	0.0002	0.00896505	1.22279
56112	PCDHGA3	0.196965	0.436578	0	0	1.21653
5664	PSEN2	0.126093	0.278025	0	0	1.20492
643770	LOC643770	0.236282	0.52069	0	0	1.20368
94032	CAMK2N2	0.151333	0.333014	0	0	1.20054
8301	PICALM	0.142402	0.312461	0.0028	0.0570085	1.19422
529	ATP6V1E1	0.1059	0.232045	0	0	1.19117
9517	SPTLC2	0.117208	0.256109	0	0	1.18508
56257	MEPCE	0.11802	0.25733	0	0	1.18039
90809	TMEM55B	0.115708	0.251896	0	0	1.177
440359	CSDAP1	0.24195	0.526616	0	0	1.17655
6007	RHD	0.0982856	0.213454	0	0	1.17178
259287	TAS2R41	0.168994	0.365892	0.0002	0.00896505	1.16512
10256	CNKSR1	0.242285	0.524122	0	0	1.16325
153571	C5orf38	0.228839	0.494661	0	0	1.16161
80021	TMEM62	0.13643	0.293943	0	0	1.15453
22858	ICK	0.0945859	0.203232	0.0002	0.00896505	1.14865
125	ADH1B	0.343438	0.737838	0	0	1.14839
2214	FCGR3A	0.196288	0.421701	0	0	1.14838
640	BLK	0.136307	0.292072	0.0006	0.0206289	1.14275
29882	ANAPC2	0.0848892	0.181646	0	0	1.1398
83641	FAM107B	0.197186	0.420863	0.001	0.0295133	1.13435
10552	ARPC1A	0.087728	0.185886	0	0	1.11889
100529215	ZNF559-ZNF177	0.114602	0.241179	0	0	1.10448
5396	PRRX1	0.122586	0.257398	0.0002	0.00896505	1.09974
200205	IBA57	0.214944	0.450676	0	0	1.09671
2831	NPBWR1	0.245241	0.514188	0	0	1.09666
92689	FAM114A1	0.140953	0.295422	0.0006	0.0206289	1.09589
9031	BAZ1B	0.108933	0.228185	0.0004	0.0154398	1.09472
120066	OR5P3	0.209476	0.437777	0	0	1.08986
79290	OR13A1	0.19497	0.407327	0.0014	0.0375322	1.08918
11254	SLC6A14	0.159597	0.333419	0.0016	0.0404856	1.08913
594837	SNORD101	0.202178	0.421554	0	0	1.08506
56134	PCDHAC2	0.0974865	0.203264	0.0002	0.00896505	1.08504
9765	ZFYVE16	0.192957	0.400854	0	0	1.07743
200162	SPAG17	0.251156	0.521702	0	0	1.0772
285848	PNPLA1	0.172332	0.357966	0	0	1.07719
54838	C10orf26	0.150867	0.312563	0.0004	0.0154398	1.07178
9619	ABCG1	0.0975817	0.201695	0.0004	0.0154398	1.06694
84129	ACAD11	0.233508	0.482274	0.0006	0.0206289	1.06534
55039	TRMT12	0.148789	0.306971	0	0	1.06313
9767	PHF16	0.188471	0.388707	0	0	1.06242
23002	DAAM1	0.197589	0.407375	0	0	1.06173
283953	TMEM114	0.100076	0.206021	0	0	1.05865
5202	PFDN2	0.15901	0.326561	0	0	1.05371
22900	CARD8	0.208765	0.428625	0	0	1.05315
7532	YWHAG	0.176132	0.361303	0	0	1.05131
55313	CPPED1	0.122956	0.252013	0	0	1.04962
10675	CSPG5	0.222543	0.454858	0.0002	0.00896505	1.04391
25870	SUMF2	0.139623	0.285218	0.0004	0.0154398	1.04277
129450	TYW5	0.108705	0.221987	0	0	1.04211
2268	FGR	0.13024	0.265908	0	0	1.04168
10712	FAM189B	0.0840809	0.171634	0	0	1.0413
6280	S100A9	0.209345	0.42718	0	0	1.04055
55809	TRERF1	0.0604722	0.123393	0	0	1.04049
51593	SRRT	0.112394	0.229302	0	0	1.04016
51555	PEX5L	0.171496	0.349555	0.0002	0.00896505	1.03827
84791	LINC00467	0.192126	0.391196	0.0048	0.0771842	1.03614
8543	LMO4	0.164202	0.334035	0.0002	0.00896505	1.03429
9787	DLGAP5	0.175327	0.356119	0	0	1.03117
23240	KIAA0922	0.19733	0.400528	0	0	1.02974
79883	PODNL1	0.090722	0.1841	0	0	1.02927
4194	MDM4	0.23866	0.484076	0.0016	0.0404856	1.02831
768211	RELL1	0.212787	0.431118	0.0008	0.0252652	1.02606
65982	ZSCAN18	0.166183	0.336245	0.0016	0.0404856	1.02335
8202	NCOA3	0.197535	0.399551	0	0	1.02268
1213	CLTC	0.164534	0.33272	0	0	1.0222
9120	SLC16A6	0.143825	0.290292	0	0	1.01836
8289	ARID1A	0.113215	0.228494	0.0034	0.0634882	1.01822
7280	TUBB2A	0.089823	0.181015	0.0024	0.0517723	1.01524
84520	C14orf142	0.172748	0.348035	0.0002	0.00896505	1.0147
54538	ROBO4	0.27271	0.549358	0.0004	0.0154398	1.01444
1718	DHCR24	0.174161	0.350833	0	0	1.01442
92799	SHKBP1	0.136725	0.275078	0	0	1.01191
6139	RPL17	0.197419	0.397181	0	0	1.01187
375612	LHFPL3	0.144021	0.289449	0	0	1.00977
83849	SYT15	0.184285	0.370349	0.0002	0.00896505	1.00965
51649	MRPS23	0.153087	0.307353	0.0022	0.0491756	1.00771
10148	EBI3	0.0982264	0.197193	0.0008	0.0252652	1.00753
129138	ANKRD54	0.149658	0.299221	0.0024	0.0517723	0.99936
158798	AKAP14	0.209722	0.418451	0.0014	0.0375322	0.995266
1346	COX7A1	0.292877	0.584072	0	0	0.994256
9022	CLIC3	0.128625	0.256325	0	0	0.992813
5151	PDE8A	0.173199	0.344497	0	0	0.989023
51704	GPRC5B	0.239807	0.476975	0.0006	0.0206289	0.988992
9139	CBFA2T2	0.107024	0.212467	0	0	0.985233
6837	MED22	0.108341	0.21481	0.018	0.162068	0.982713
54913	RPP25	0.110392	0.218846	0	0	0.982443
10738	RFPL3	0.187062	0.370011	0.005	0.0794805	0.97802
26476	OR10J1	0.144383	0.284447	0.0018	0.0435	0.97008
340156	MYLK4	0.269183	0.529823	0.0004	0.0154398	0.968265
166614	DCLK2	0.144966	0.28529	0	0	0.967986
2199	FBLN2	0.187258	0.367917	0.0072	0.0971359	0.964762
4250	SCGB2A2	0.167445	0.328936	0	0	0.964441
309	ANXA6	0.178627	0.350456	0.0002	0.00896505	0.961936
129787	TMEM18	0.149609	0.293336	0	0	0.960678
55062	WIPI1	0.101229	0.198147	0.0004	0.0154398	0.957419
79572	ATP13A3	0.15484	0.302329	0.0002	0.00896505	0.952527
55721	IQCC	0.225534	0.440225	0	0	0.951928
1933	EEF1B2	0.0984711	0.192207	0	0	0.951917
79746	ECHDC3	0.244225	0.476529	0.0002	0.00896505	0.951192
2585	GALK2	0.131879	0.257261	0.0028	0.0570085	0.950731
51528	JKAMP	0.113052	0.220364	0	0	0.949233
4040	LRP6	0.149278	0.290938	0.0002	0.00896505	0.948963
55486	PARL	0.119672	0.233142	0.0008	0.0252652	0.948178
221241	LINC00305	0.127981	0.249019	0.0022	0.0491756	0.94575
255027	MPV17L	0.263811	0.513142	0.0002	0.00896505	0.945109
343	AQP8	0.276097	0.536976	0	0	0.94488
221491	C6orf1	0.125256	0.2435	0.0002	0.00896505	0.944025
147111	NOTUM	0.377336	0.733239	0	0	0.943199
8303	SNN	0.158385	0.307696	0	0	0.942706
10437	IFI30	0.376815	0.731915	0	0	0.942369
25939	SAMHD1	0.202712	0.3936	0.0038	0.0676254	0.941674
340578	DCAF12L2	0.155703	0.302095	0	0	0.940201
22845	DOLK	0.175864	0.341044	0	0	0.939252
51275	C12orf47	0.140289	0.271982	0.0014	0.0375322	0.938724
56953	NT5M	0.108256	0.20983	0.0002	0.00896505	0.938281
6300	MAPK12	0.131471	0.254751	0	0	0.937704
2039	EPB49	0.115159	0.223026	0	0	0.936671
730081	LOC730081	0.330385	0.639837	0	0	0.936637
9049	AIP	0.166707	0.322395	0	0	0.933899
27429	HTRA2	0.107973	0.208756	0	0	0.933399
55211	DPPA4	0.207468	0.400437	0.0038	0.0676254	0.930116
51455	REV1	0.146908	0.283137	0	0	0.927303
162417	NAGS	0.202841	0.390737	0	0	0.926317
7422	VEGFA	0.194046	0.373113	0.0012	0.0336303	0.922807
64710	NUCKS1	0.158603	0.304894	0.0104	0.119518	0.922375
8382	NME5	0.207275	0.398389	0.0002	0.00896505	0.922031
55061	SUSD4	0.193343	0.371474	0	0	0.921322
142940	TRUB1	0.146207	0.280677	0.0052	0.0814178	0.919731
222234	FAM185A	0.156692	0.300547	0	0	0.918076
654	BMP6	0.298825	0.573073	0	0	0.917753
645212	LOC645212	0.10956	0.210101	0	0	0.917681
3779	KCNMB1	0.0972103	0.186185	0.0028	0.0570085	0.915283
677777	SCARNA12	0.131071	0.250922	0.0062	0.0895884	0.914401
126147	NTN5	0.213186	0.407877	0.001	0.0295133	0.913245
1778	DYNC1H1	0.18829	0.359782	0	0	0.910786
27034	ACAD8	0.124288	0.237476	0	0	0.910691
15	AANAT	0.0945559	0.180599	0.0008	0.0252652	0.909969
389827	TMEM8C	0.156423	0.298588	0.0002	0.00896505	0.908854
63876	PKNOX2	0.102961	0.196498	0.0012	0.0336303	0.90847
1003	CDH5	0.302109	0.575831	0	0	0.906035
10813	UTP14A	0.144832	0.276037	0.0048	0.0771842	0.905906
403314	APOBEC4	0.134308	0.255896	0	0	0.905292
9810	RNF40	0.0985376	0.187574	0	0	0.903581
285962	FLJ40852	0.112799	0.214634	0.0018	0.0435	0.902805
84255	SLC37A3	0.116269	0.22113	0.022	0.178516	0.901885
26284	ERAL1	0.115474	0.219612	0	0	0.901828
6527	SLC5A4	0.267436	0.50826	0.0092	0.111247	0.900497
124221	PRSS30P	0.130305	0.247578	0.0034	0.0634882	0.899983
55266	TMEM19	0.132428	0.251562	0	0	0.899608
6648	SOD2	0.177685	0.337244	0	0	0.897986
56606	SLC2A9	0.115564	0.219249	0	0	0.897205
374882	TMEM205	0.106236	0.201415	0.0008	0.0252652	0.895911
79937	CNTNAP3	0.251785	0.477275	0.0006	0.0206289	0.895567
79725	THAP9	0.158351	0.299995	0.001	0.0295133	0.894493
5329	PLAUR	0.186396	0.353065	0	0	0.89417
750	C16orf3	0.183413	0.346968	0	0	0.891731
26548	ITGB1BP2	0.212522	0.402025	0.0074	0.0982444	0.891687
328	APEX1	0.159419	0.301202	0.0002	0.00896505	0.889369
55964	Septin 3	0.126355	0.238512	0.0036	0.0656783	0.887643
113402	SFT2D1	0.148492	0.280135	0.0004	0.0154398	0.886529
64762	FAM59A	0.183797	0.346433	0	0	0.884867
79590	MRPL24	0.136147	0.256581	0.0004	0.0154398	0.884593
83446	CCDC70	0.142597	0.268562	0.0006	0.0206289	0.883366
80054	LOC80054	0.13242	0.249344	0	0	0.882981
3627	CXCL10	0.318845	0.60021	0	0	0.882448
3155	HMGCL	0.122614	0.230762	0.0002	0.00896505	0.882019
9758	FRMPD4	0.194517	0.366064	0.0048	0.0771842	0.881916
8341	HIST1H2BN	0.146149	0.274556	0.0524	0.282682	0.878605
79694	MANEA	0.200191	0.375959	0.0158	0.151069	0.878003
7332	UBE2L3	0.181281	0.340307	0.0008	0.0252652	0.877238
84733	CBX2	0.116451	0.218602	0	0	0.877207
79075	DSCC1	0.486372	0.912108	0	0	0.875332
22876	INPP5F	0.122512	0.229668	0	0	0.874651
1059	CENPB	0.153677	0.287462	0.0008	0.0252652	0.870566
85379	KIAA1671	0.178569	0.334024	0.0002	0.00896505	0.870562
3703	STT3A	0.137275	0.256702	0	0	0.869982
23576	DDAH1	0.160245	0.299527	0	0	0.869182
5267	SERPINA4	0.205256	0.383237	0.0018	0.0435	0.867115
152485	ZNF827	0.115883	0.21628	0.0016	0.0404856	0.866367
1298	COL9A2	0.191338	0.35709	0	0	0.866276
5434	POLR2E	0.125726	0.23462	0.0108	0.122095	0.866131
5770	PTPN1	0.168544	0.314504	0.004	0.0698429	0.866001
51304	ZDHHC3	0.127856	0.238447	0	0	0.864967
493869	GPX8	0.13769	0.256732	0	0	0.864568
2782	GNB1	0.115175	0.21436	0.0006	0.0206289	0.861158
255480	LOC255480	0.183051	0.340645	0	0	0.860929
26974	ZNF285	0.158096	0.294065	0.0018	0.0435	0.860036
145957	NRG4	0.12538	0.2331	0.01	0.116854	0.859138
6622	SNCA	0.179689	0.334042	0	0	0.859008
653808	ZG16	0.224021	0.415201	0.0076	0.100024	0.853403
84747	UNC119B	0.171134	0.317044	0.0228	0.181129	0.852607
255189	PLA2G4F	0.147926	0.273954	0.0236	0.184669	0.85197
146802	SLC47A2	0.296272	0.548496	0.0114	0.126561	0.851325
8668	EIF3I	0.107774	0.199521	0.0004	0.0154398	0.851287
6227	RPS21	0.117833	0.218137	0.006	0.0879174	0.851238
3375	IAPP	0.179102	0.331372	0.002	0.0466434	0.850185
56155	TEX14	0.393968	0.728617	0.0026	0.0546721	0.849434
283481	LOC283481	0.185698	0.343351	0.003	0.0588529	0.848982
255082	CASC2	0.127014	0.234771	0.0014	0.0375322	0.848385
677823	SNORA42	0.146123	0.270088	0.0002	0.00896505	0.848364
23041	MON2	0.125085	0.231073	0.0028	0.0570085	0.847323
92922	CCDC102A	0.145686	0.268817	0	0	0.84518
3562	IL3	0.24206	0.446623	0.0004	0.0154398	0.845089
386678	KRTAP10-11	0.0921961	0.170058	0.0018	0.0435	0.844522
84502	JPH4	0.15191	0.280072	0.0084	0.105633	0.843678
4858	NOVA2	0.175434	0.322921	0.0002	0.00896505	0.840701
10633	RASL10A	0.206838	0.380708	0	0	0.840611
8926	SNURF	0.130251	0.23962	0.003	0.0588529	0.839683
55109	AGGF1	0.109787	0.20195	0.0094	0.112523	0.839464
284418	FAM71E2	0.115602	0.212584	0.0016	0.0404856	0.83893
3206	HOXA10	0.109152	0.200689	0.0028	0.0570085	0.838621
117584	RFFL	0.114186	0.209583	0.001	0.0295133	0.835451
56888	KCMF1	0.12623	0.231652	0.0104	0.119518	0.835149
10135	NAMPT	0.142552	0.26137	0.0004	0.0154398	0.833516
55539	KCNQ1DN	0.272978	0.500441	0.0008	0.0252652	0.833265
352909	C19orf51	0.162109	0.296795	0.0008	0.0252652	0.830833
8484	GALR3	0.163524	0.298889	0.0024	0.0517723	0.827794
57415	C3orf14	0.151642	0.276962	0.001	0.0295133	0.826422
193629	LINC00189	0.218839	0.39968	0.0004	0.0154398	0.826363
51567	TDP2	0.124887	0.22802	0.0086	0.106859	0.825815
25972	UNC50	0.140397	0.256016	0.0008	0.0252652	0.823517
1837	DTNA	0.149972	0.273447	0	0	0.823323
84319	C3orf26	0.130735	0.238351	0.0016	0.0404856	0.823155
255022	CALHM1	0.209634	0.381992	0.0042	0.0716837	0.822182
115908	CTHRC1	0.251063	0.457471	0.0008	0.0252652	0.822136
283150	FOXR1	0.295142	0.537444	0.0002	0.00896505	0.820966
4584	MUC3A	0.0942673	0.171488	0.007	0.0963873	0.819172
93343	FAM125A	0.173451	0.31548	0.0112	0.125426	0.818844
26253	CLEC4E	0.260577	0.473835	0.0022	0.0491756	0.818403
10614	HEXIM1	0.130311	0.23683	0	0	0.817421
51125	GOLGA7	0.152214	0.276589	0	0	0.817099
9907	KIAA0415	0.139002	0.252416	0.0064	0.0909029	0.815919
149650	FLJ32154	0.15443	0.280313	0.0056	0.0847368	0.815145
9118	INA	0.174444	0.316547	0	0	0.814603
341346	C12orf70	0.170514	0.309372	0.015	0.147132	0.814344
30849	PIK3R4	0.133518	0.242211	0.0036	0.0656783	0.814061
55093	WDYHV1	0.17913	0.324794	0.0012	0.0336303	0.813173
8312	AXIN1	0.150186	0.272061	0.0002	0.00896505	0.811493
158572	LOC158572	0.220521	0.399416	0.0004	0.0154398	0.811234
7351	UCP2	0.135924	0.246173	0.0006	0.0206289	0.811111
26273	FBXO3	0.0942635	0.170552	0.001	0.0295133	0.809313
80012	PHC3	0.200696	0.362799	0.0136	0.139471	0.807708
11223	MST1P9	0.186203	0.336551	0.0008	0.0252652	0.807447
57654	KIAA1530	0.228363	0.412599	0.0016	0.0404856	0.806771
6282	S100A11	0.122479	0.221263	0.001	0.0295133	0.806532
10324	KBTBD10	0.223452	0.403393	0.0154	0.149126	0.805277
431704	RGS21	0.142723	0.257485	0.0038	0.0676254	0.804081
54979	HRASLS2	0.170178	0.306919	0.001	0.0295133	0.80351
341276	OR10A2	0.204739	0.369242	0	0	0.803478
64768	IPPK	0.196878	0.355054	0.0056	0.0847368	0.803423
242	ALOX12B	0.15613	0.281461	0.004	0.0698429	0.802734
131870	NUDT16	0.118319	0.213268	0.0014	0.0375322	0.80248
90381	C15orf42	0.209815	0.378152	0.0086	0.106859	0.802313
3902	LAG3	0.17219	0.310319	0	0	0.802186
4303	FOXO4	0.152915	0.275438	0	0	0.801246
55893	ZNF395	0.267562	0.481552	0	0	0.799778
4214	MAP3K1	0.161674	0.290884	0.0084	0.105633	0.799204
7574	ZNF26	0.196232	0.353021	0.0002	0.00896505	0.799
8493	PPM1D	0.20011	0.35997	0	0	0.798863
9479	MAPK8IP1	0.0981281	0.17649	0.011	0.12402	0.798567
55267	C22orf26	0.122739	0.220669	0.0002	0.00896505	0.797868
283403	LOC283403	0.168092	0.302052	0.0002	0.00896505	0.796941
1066	CES1	0.307301	0.552181	0	0	0.796873
345456	PFN3	0.172867	0.310583	0	0	0.796664
6725	SRMS	0.0863742	0.155136	0.0208	0.17316	0.796089
79722	ANKRD55	0.369347	0.663245	0.0016	0.0404856	0.795722
11119	BTN3A1	0.09831	0.176469	0.0056	0.0847368	0.795028
6857	SYT1	0.161002	0.288927	0	0	0.794561
4184	SMCP	0.133246	0.239097	0.0002	0.00896505	0.794408
245973	ATP6V1C2	0.281826	0.505637	0.003	0.0588529	0.794148
22877	MLXIP	0.182839	0.327943	0	0	0.793612
6048	RNF5	0.108809	0.195107	0.0014	0.0375322	0.793108
114599	SNORD15B	0.209901	0.376319	0.0002	0.00896505	0.792846
10897	YIF1A	0.120099	0.215318	0	0	0.792837
57326	PBXIP1	0.174041	0.312013	0.0112	0.125426	0.792757
10381	TUBB3	0.205738	0.368761	0.0052	0.0814178	0.792377
7336	UBE2V2	0.152352	0.273057	0	0	0.792281
353497	POLN	0.138477	0.248188	0	0	0.792274
91775	FAM55C	0.129526	0.232062	0.002	0.0466434	0.791626
163882	CNST	0.266294	0.477062	0.003	0.0588529	0.791483
5635	PRPSAP1	0.174141	0.311848	0	0	0.790778
8576	STK16	0.117315	0.210019	0	0	0.790214
80215	RUNX1-IT1	0.177349	0.31746	0.0002	0.00896505	0.790031
57216	VANGL2	0.120284	0.215307	0	0	0.78999
80746	TSEN2	0.173603	0.310698	0.0072	0.0971359	0.789709
57136	C20orf3	0.114345	0.204584	0.0004	0.0154398	0.789182
54780	NSMCE4A	0.109477	0.195665	0.0064	0.0909029	0.787274
5108	PCM1	0.143063	0.255662	0.0194	0.16744	0.787063
119682	OR51L1	0.195	0.34847	0	0	0.787031
4438	MSH4	0.511261	0.913199	0.0028	0.0570085	0.786171
2620	GAS2	0.115114	0.205593	0.0016	0.0404856	0.785991
1073	CFL2	0.0825909	0.14747	0.0082	0.104698	0.785551
7772	ZNF229	0.186351	0.332695	0.0586	0.297822	0.785318
8611	PPAP2A	0.155112	0.276683	0.0004	0.0154398	0.78376
5869	RAB5B	0.122166	0.217901	0.0108	0.122095	0.783651
90843	TCEAL8	0.125481	0.22366	0	0	0.782426
4088	SMAD3	0.129566	0.230911	0.0102	0.118444	0.782192
8123	PAR5	0.371753	0.662296	0	0	0.781549
147040	KCTD11	0.167896	0.298809	0.0058	0.0864298	0.779725
4809	NHP2L1	0.109563	0.194943	0	0	0.779281
58503	PROL1	0.168187	0.299169	0	0	0.778794
286102	TMED10P1	0.203153	0.361339	0.003	0.0588529	0.778656
91607	SLFN11	0.259174	0.460941	0.0032	0.0615456	0.778501
55761	TTC17	0.116733	0.207599	0.0002	0.00896505	0.778412
338324	S100A7A	0.154917	0.275418	0.0008	0.0252652	0.777836
26146	TRAF3IP1	0.163298	0.290269	0.0036	0.0656783	0.777539
25984	KRT23	0.140963	0.250557	0.0226	0.180227	0.777469
126298	IRGQ	0.163985	0.29092	0.001	0.0295133	0.774067
53345	TM6SF2	0.181325	0.321678	0.0046	0.0751273	0.774042
23163	GGA3	0.123289	0.218643	0.0002	0.00896505	0.773412
22866	CNKSR2	0.167619	0.297239	0.0016	0.0404856	0.773307
153396	TMEM161B	0.0843485	0.149555	0.0242	0.186563	0.773064
79066	METTL16	0.284401	0.503931	0.0002	0.00896505	0.771903
257062	TMEM146	0.210293	0.372518	0.0016	0.0404856	0.771422
57118	CAMK1D	0.152819	0.270677	0.0112	0.125426	0.771226
152815	THAP6	0.305254	0.540415	0.0036	0.0656783	0.770381
1432	MAPK14	0.0775488	0.137222	0.0432	0.253737	0.769493
645700	ZNF890P	0.101725	0.179871	0.0008	0.0252652	0.768204
8674	VAMP4	0.106022	0.187417	0.0064	0.0909029	0.767724
3836	KPNA1	0.120519	0.212942	0.0032	0.0615456	0.766871
10161	LPAR6	0.261033	0.460914	0.0086	0.106859	0.765732
124751	KRBA2	0.220269	0.388851	0	0	0.765344
389084	C2orf82	0.17412	0.307376	0.0026	0.0546721	0.765315
23471	TRAM1	0.11848	0.20908	0.0358	0.229514	0.764678
130576	LYPD6B	0.15927	0.281037	0.0006	0.0206289	0.764531
7082	TJP1	0.11953	0.210904	0.0034	0.0634882	0.764447
4319	MMP10	0.184333	0.325141	0.0008	0.0252652	0.763877
100526694	C9orf30-TMEFF1	0.181588	0.320281	0.0002	0.00896505	0.763779
8570	KHSRP	0.122255	0.215617	0.0148	0.145943	0.763674
114793	FMNL2	0.16253	0.28661	0.002	0.0466434	0.763425
23313	KIAA0930	0.176311	0.310334	0.0062	0.0895884	0.760152
3037	HAS2	0.190198	0.334747	0.0158	0.151069	0.759989
10077	TSPAN32	0.113242	0.199228	0	0	0.759316
29970	SCHIP1	0.195709	0.344235	0.0002	0.00896505	0.758913
23647	ARFIP2	0.142112	0.249894	0.0076	0.100024	0.75843
29089	UBE2T	0.170168	0.299156	0.0002	0.00896505	0.758007
144486	LOC144486	0.174101	0.306037	0.0016	0.0404856	0.757817
5223	PGAM1	0.134005	0.235398	0.0068	0.0943344	0.756637
170627	XAGE5	0.152156	0.267166	0.0006	0.0206289	0.755869
55276	PGM2	0.235404	0.413236	0	0	0.755433
9520	NPEPPS	0.161419	0.283194	0.0018	0.0435	0.754399
55509	BATF3	0.324447	0.568721	0.0018	0.0435	0.752896
157777	C8orf45	0.165965	0.29088	0.0054	0.083144	0.752664
26301	GBGT1	0.125948	0.220679	0.0002	0.00896505	0.752142
65122	PRAMEF2	0.157031	0.275122	0.001	0.0295133	0.752027
4975	OMP	0.169616	0.297075	0.0872	0.363788	0.751456
4818	NKG7	0.126098	0.220765	0	0	0.750738
6602	SMARCD1	0.122336	0.214125	0.0032	0.0615456	0.7503
221481	ARMC12	0.177431	0.310537	0.0034	0.0634882	0.750187
55707	NECAP2	0.180308	0.315404	0.0032	0.0615456	0.749247
166378	SPATA5	0.29797	0.52104	0	0	0.748632
2001	ELF5	0.0993251	0.173672	0.004	0.0698429	0.748525
7454	WAS	0.230712	0.403327	0	0	0.748185
84726	PRRC2B	0.121266	0.21196	0.039	0.240861	0.747889
2773	GNAI3	0.226179	0.395328	0.0034	0.0634882	0.747853
284739	LINC00176	0.111004	0.19401	0.019	0.16675	0.747777
63933	CCDC90A	0.161269	0.281768	0	0	0.747187
1641	DCX	0.128812	0.224993	0	0	0.746684
2780	GNAT2	0.353773	0.617923	0.0008	0.0252652	0.746666
337971	KRTAP19-4	0.315159	0.550379	0.0008	0.0252652	0.746352
7754	ZNF204P	0.186093	0.324906	0.0044	0.0732967	0.745935
8411	EEA1	0.417375	0.728632	0.0014	0.0375322	0.745747
1798	DPAGT1	0.129603	0.226217	0.0002	0.00896505	0.745464
9625	AATK	0.121538	0.212053	0	0	0.744741
5168	ENPP2	0.220194	0.384165	0.0008	0.0252652	0.744668
5245	PHB	0.142763	0.248911	0	0	0.743528
51297	BPIFA1	0.173149	0.301535	0.0002	0.00896505	0.741473
100271715	ARHGEF33	0.154754	0.269411	0.0306	0.212341	0.740896
327657	SERPINA9	0.190854	0.332081	0.013	0.135909	0.739977
80761	UPK3B	0.134775	0.234468	0	0	0.739703
4931	NVL	0.155789	0.271013	0.0002	0.00896505	0.73962
285629	LOC285629	0.166327	0.28931	0	0	0.739407
54958	TMEM160	0.163469	0.284269	0	0	0.738979
7442	TRPV1	0.0886782	0.154206	0.0088	0.108777	0.738936
3959	LGALS3BP	0.160699	0.27907	0	0	0.736597
8450	CUL4B	0.147188	0.255465	0.0034	0.0634882	0.735641
124930	ANKRD13B	0.160786	0.279048	0.0004	0.0154398	0.735521
4325	MMP16	0.159534	0.27686	0.0092	0.111247	0.735422
91687	CENPL	0.194799	0.33802	0.023	0.181593	0.735221
2261	FGFR3	0.129683	0.224895	0	0	0.734194
51524	TMEM138	0.161935	0.280775	0.0018	0.0435	0.733878
22835	ZFP30	0.140962	0.244347	0	0	0.73342
81894	SLC25A28	0.132041	0.228813	0.0064	0.0909029	0.732894
8850	KAT2B	0.155061	0.268643	0.0174	0.159333	0.732494
9644	SH3PXD2A	0.125781	0.217897	0	0	0.732356
6811	STX5	0.154846	0.268209	0.0096	0.113371	0.732099
1602	DACH1	0.132756	0.229856	0.0014	0.0375322	0.731413
9134	CCNE2	0.177729	0.307718	0.0044	0.0732967	0.731392
1071	CETP	0.224469	0.388417	0.0154	0.149126	0.730385
84960	KIAA1984	0.116106	0.200885	0.0046	0.0751273	0.730186
5387	PMS2P3	0.243934	0.42193	0.0046	0.0751273	0.729692
153328	SLC25A48	0.32003	0.553227	0.014	0.141228	0.728673
100506334	LOC100506334	0.161644	0.279311	0.0166	0.154726	0.727946
55638	SYBU	0.174907	0.302209	0.014	0.141228	0.727827
10051	SMC4	0.128251	0.221531	0.0426	0.25181	0.727328
4693	NDP	0.19814	0.342205	0.002	0.0466434	0.727083
1942	EFNA1	0.225229	0.388952	0.0038	0.0676254	0.726917
7988	ZNF212	0.136802	0.236198	0.0016	0.0404856	0.726559
8939	FUBP3	0.148278	0.255995	0	0	0.726444
27240	SIT1	0.135716	0.234234	0.0038	0.0676254	0.725922
23150	FRMD4B	0.178924	0.308774	0.0018	0.0435	0.725727
65243	ZNF643	0.204998	0.353691	0.0014	0.0375322	0.725336
92714	ARRDC1	0.158216	0.272918	0.0002	0.00896505	0.724973
55172	DNAAF2	0.210314	0.362716	0.0054	0.083144	0.724641
138162	C9orf116	0.175801	0.303077	0.0198	0.169142	0.72398
6004	RGS16	0.292824	0.504817	0	0	0.72396
100151684	RNU6ATAC	0.22402	0.386058	0.0038	0.0676254	0.723319
9025	RNF8	0.15012	0.258627	0.0194	0.16744	0.722804
83655	LINC00208	0.132548	0.22833	0.0014	0.0375322	0.722615
6415	SEPW1	0.161766	0.27864	0.0074	0.0982444	0.722492
821	CANX	0.133862	0.230542	0.0106	0.120652	0.722232
83714	NRIP2	0.202308	0.348175	0	0	0.721012
91851	CHRDL1	0.233902	0.402335	0.0012	0.0336303	0.720097
4500	MT1L	0.141526	0.243397	0.0014	0.0375322	0.719799
9133	CCNB2	0.131573	0.226183	0.0106	0.120652	0.719074
51741	WWOX	0.13106	0.22528	0.0034	0.0634882	0.71891
3145	HMBS	0.168856	0.290093	0.0114	0.126561	0.717991
256949	KANK3	0.152324	0.261576	0.0326	0.217965	0.717229
117145	THEM4	0.203067	0.348692	0.0036	0.0656783	0.717133
373509	USP50	0.222197	0.38153	0.0006	0.0206289	0.717078
100628315	DNM3OS	0.164635	0.282586	0.0006	0.0206289	0.716433
333926	PPM1J	0.171935	0.295079	0.0036	0.0656783	0.716222
8050	PDHX	0.162704	0.279177	0.0138	0.140229	0.71586
3933	LCN1	0.142798	0.245018	0.009	0.110026	0.715839
363	AQP6	0.276508	0.474211	0.009	0.110026	0.715
7274	TTPA	0.221269	0.379425	0.0242	0.186563	0.71477
168544	ZNF467	0.124959	0.214166	0.0012	0.0336303	0.713891
83886	PRSS27	0.139488	0.239064	0.0036	0.0656783	0.713869
79689	STEAP4	0.142634	0.244439	0.0372	0.234522	0.713754
23242	COBL	0.136205	0.233364	0.0308	0.212579	0.713325
5537	PPP6C	0.175637	0.300876	0.0064	0.0909029	0.713053
5156	PDGFRA	0.308733	0.528836	0.0012	0.0336303	0.712922
5867	RAB4A	0.134248	0.229949	0.0028	0.0570085	0.712867
54886	LPPR1	0.190102	0.325409	0	0	0.711764
283571	PROX2	0.352953	0.604094	0	0	0.711542
122961	ISCA2	0.145629	0.249174	0	0	0.711017
34	ACADM	0.103864	0.177699	0.0058	0.0864298	0.710881
5872	RAB13	0.182307	0.311843	0	0	0.710537
6422	SFRP1	0.297828	0.509239	0.0022	0.0491756	0.709842
54566	EPB41L4B	0.0726931	0.124228	0.0532	0.284787	0.708941
2542	SLC37A4	0.200041	0.341789	0.0012	0.0336303	0.708598
114548	NLRP3	0.172616	0.294788	0.0016	0.0404856	0.707766
9397	NMT2	0.164042	0.279919	0.0006	0.0206289	0.706391
221545	C6orf136	0.13983	0.238575	0.005	0.0794805	0.706186
3050	HBZ	0.115859	0.197664	0.0002	0.00896505	0.70607
2483	FRG1	0.226283	0.385946	0.0132	0.137226	0.705587
23300	ATMIN	0.108959	0.185814	0.003	0.0588529	0.705364
27332	ZNF638	0.131542	0.224271	0.0002	0.00896505	0.704941
8869	ST3GAL5	0.148312	0.252719	0.0056	0.0847368	0.703964
391109	OR10K1	0.169885	0.289434	0.0066	0.092561	0.703703
8888	MCM3AP	0.112142	0.190944	0.0102	0.118444	0.702688
9296	ATP6V1F	0.110496	0.188113	0.0178	0.16105	0.702443
5764	PTN	0.235795	0.401295	0.0036	0.0656783	0.701878
83756	TAS1R3	0.124132	0.211246	0.0078	0.101455	0.701789
340075	ARSI	0.246374	0.419094	0.0042	0.0716837	0.70105
10270	AKAP8	0.198525	0.337677	0.0028	0.0570085	0.700928
5730	PTGDS	0.293155	0.498554	0.0014	0.0375322	0.70065
27183	VPS4A	0.143899	0.244684	0.0182	0.163428	0.700386
80196	RNF34	0.145294	0.24705	0.0128	0.134578	0.700339
2295	FOXF2	0.17695	0.300868	0	0	0.700301
23764	MAFF	0.201835	0.343129	0.0014	0.0375322	0.700048
84910	TMEM87B	0.240609	0.408991	0.0438	0.25573	0.699818
4212	MEIS2	0.135003	0.22947	0.0004	0.0154398	0.699731
125488	TTC39C	0.136886	0.232664	0.0038	0.0676254	0.699696
22911	WDR47	0.137914	0.234375	0.0454	0.261411	0.699431
9655	SOCS5	0.131391	0.223253	0	0	0.699155
7329	UBE2I	0.102148	0.173531	0.038	0.236879	0.698821
2935	GSPT1	0.108589	0.184427	0	0	0.698393
2498	FTH1P3	0.233279	0.396181	0.0014	0.0375322	0.698312
9472	AKAP6	0.212509	0.36075	0.0062	0.0895884	0.697573
27133	KCNH5	0.204075	0.346364	0.0068	0.0943344	0.697234
4125	MAN2B1	0.150793	0.255802	0.0026	0.0546721	0.696377
126119	JOSD2	0.136014	0.230477	0.0156	0.150364	0.694511
64320	RNF25	0.131086	0.222036	0.005	0.0794805	0.693822
4644	MYO5A	0.129344	0.219084	0.0004	0.0154398	0.693811
64080	RBKS	0.160174	0.271254	0.0006	0.0206289	0.693501
84516	DCTN5	0.238026	0.402861	0	0	0.692505
81555	YIPF5	0.177927	0.301121	0.0074	0.0982444	0.692385
10293	TRAIP	0.241356	0.408388	0.0042	0.0716837	0.692058
9900	SV2A	0.167924	0.283999	0.0006	0.0206289	0.691238
6124	RPL4	0.129762	0.219438	0.0224	0.179232	0.691085
100130155	LOC100130155	0.187848	0.317602	0.0008	0.0252652	0.690742
283189	OR9G4	0.188365	0.318369	0.0206	0.172616	0.690174
2683	B4GALT1	0.210651	0.35603	0.0012	0.0336303	0.690142
3936	LCP1	0.241989	0.408933	0.0018	0.0435	0.68988
3221	HOXC4	0.134786	0.227759	0.0064	0.0909029	0.68978
2941	GSTA4	0.125236	0.211552	0.0002	0.00896505	0.689223
5083	PAX9	0.161798	0.273289	0.0012	0.0336303	0.689075
130120	REG3G	0.147499	0.24909	0.0176	0.160197	0.688758
6203	RPS9	0.0986007	0.166497	0.0232	0.182653	0.688603
158866	ZDHHC15	0.176429	0.297916	0.0034	0.0634882	0.688592
5753	PTK6	0.13494	0.227827	0.001	0.0295133	0.688349
1580	CYP4B1	0.172274	0.290838	0.0044	0.0732967	0.688226
56344	CABP5	0.117122	0.197712	0.0048	0.0771842	0.688088
284942	RPL23AP82	0.177085	0.298889	0.001	0.0295133	0.687822
65263	PYCRL	0.118354	0.199733	0.0066	0.092561	0.687592
285755	PPIL6	0.212957	0.359297	0.0022	0.0491756	0.687179
337973	KRTAP19-6	0.205873	0.347299	0.0082	0.104698	0.686962
120796	OR56A1	0.212841	0.35897	0.0056	0.0847368	0.686566
79958	DENND1C	0.108912	0.183616	0	0	0.685901
100101120	TTTY7B	0.149523	0.252053	0.0946	0.377021	0.685714
3835	KIF22	0.228685	0.385486	0.0032	0.0615456	0.685662
6991	TCTE3	0.200005	0.337128	0.0068	0.0943344	0.6856
11274	USP18	0.116165	0.195807	0.0004	0.0154398	0.685595
4141	MARS	0.175264	0.295338	0.0024	0.0517723	0.685102
8538	BARX2	0.133525	0.224909	0.02	0.16998	0.684399
3028	HSD17B10	0.14197	0.239044	0.0218	0.177411	0.683766
23125	CAMTA2	0.161275	0.271484	0	0	0.68336
647087	C7orf73	0.139434	0.234699	0.0002	0.00896505	0.683225
29968	PSAT1	0.17739	0.298535	0.0394	0.242702	0.682927
9647	PPM1F	0.120644	0.20299	0.0132	0.137226	0.682546
7001	PRDX2	0.128227	0.215739	0.0172	0.158196	0.682473
286753	TUSC5	0.247914	0.417068	0.0012	0.0336303	0.682309
5126	PCSK2	0.13884	0.23355	0.006	0.0879174	0.682153
6198	RPS6KB1	0.150735	0.253535	0.02	0.16998	0.681989
22932	POMZP3	0.292779	0.492422	0.0202	0.171243	0.681891
1812	DRD1	0.227295	0.382278	0.0072	0.0971359	0.68186
133418	EMB	0.145483	0.244657	0.0192	0.166924	0.681688
548645	DNAJC25	0.241492	0.406057	0.0012	0.0336303	0.681446
1139	CHRNA7	0.42088	0.707532	0.0008	0.0252652	0.681076
23336	SYNM	0.150156	0.2524	0.003	0.0588529	0.680921
23130	ATG2A	0.12777	0.21471	0.0194	0.16744	0.680442
83787	ARMC10	0.136204	0.228804	0.0012	0.0336303	0.679862
26001	RNF167	0.148947	0.250126	0.0134	0.138185	0.679293
9796	PHYHIP	0.217671	0.365489	0.0068	0.0943344	0.679089
100288974	LOC100288974	0.18819	0.31587	0.003	0.0588529	0.678457
90246	LOC90246	0.154331	0.25903	0.0382	0.237592	0.678409
23506	KIAA0240	0.14551	0.243911	0.004	0.0698429	0.676258
374928	ZNF773	0.283704	0.475466	0.0004	0.0154398	0.675921
54514	DDX4	0.147538	0.247224	0.0006	0.0206289	0.675658
151306	GPBAR1	0.226396	0.37935	0.004	0.0698429	0.675602
2736	GLI2	0.38255	0.640936	0.0254	0.191736	0.67543
7102	TSPAN7	0.1274	0.213435	0.0302	0.210881	0.675318
55173	MRPS10	0.233982	0.391931	0.0012	0.0336303	0.675052
6653	SORL1	0.18975	0.317791	0.0004	0.0154398	0.674786
65264	UBE2Z	0.129781	0.217331	0.0004	0.0154398	0.674602
8745	ADAM23	0.117827	0.197292	0.0002	0.00896505	0.674421
9640	ZNF592	0.0862385	0.144336	0.0064	0.0909029	0.673686
7428	VHL	0.167475	0.280266	0	0	0.67348
144404	TMEM120B	0.0931321	0.155828	0.0322	0.216593	0.673194
55561	CDC42BPG	0.124096	0.207581	0.0028	0.0570085	0.67274
80007	C10orf88	0.166575	0.278609	0.002	0.0466434	0.672575
7429	VIL1	0.194084	0.324581	0.0104	0.119518	0.672376
8528	DDO	0.133626	0.223414	0.002	0.0466434	0.671935
2870	GRK6	0.176992	0.295858	0.0314	0.214149	0.671593
5590	PRKCZ	0.142669	0.238456	0.009	0.110026	0.671394
388199	PRR25	0.171924	0.287245	0.0076	0.100024	0.670762
10072	DPP3	0.0841011	0.140487	0.0056	0.0847368	0.670451
79944	L2HGDH	0.181117	0.302466	0.0078	0.101455	0.670007
85363	TRIM5	0.177133	0.295768	0.0236	0.184669	0.669757
60672	MIIP	0.0890758	0.148712	0.0014	0.0375322	0.669496
23624	CBLC	0.149055	0.248832	0.0002	0.00896505	0.669391
7745	ZNF192	0.266372	0.444638	0	0	0.669237
8508	NIPSNAP1	0.147404	0.246031	0.001	0.0295133	0.669097
3148	HMGB2	0.194591	0.324785	0.0308	0.212579	0.669068
23414	ZFPM2	0.222002	0.370253	0.0058	0.0864298	0.667788
3195	TLX1	0.142654	0.237891	0	0	0.667605
151246	SGOL2	0.280333	0.467392	0.0008	0.0252652	0.667276
64582	GPR135	0.13401	0.223385	0.0046	0.0751273	0.666919
11086	ADAM29	0.138174	0.230305	0.0098	0.115162	0.666775
1268	CNR1	0.231558	0.385953	0.0196	0.168382	0.666763
54900	LAX1	0.209331	0.348864	0.0074	0.0982444	0.666564
83900	KRTAP9-3	0.188405	0.313972	0.0094	0.112523	0.666473
9785	DHX38	0.175325	0.292155	0	0	0.666365
291	SLC25A4	0.170611	0.2842	0.0018	0.0435	0.665775
388963	C2orf81	0.300054	0.499647	0.0046	0.0751273	0.665188
23460	ABCA6	0.309379	0.514942	0.0036	0.0656783	0.664437
84883	AIFM2	0.245473	0.408468	0.0036	0.0656783	0.664002
1870	E2F2	0.181898	0.302635	0.0136	0.139471	0.663761
167691	LCA5	0.146519	0.243766	0.0136	0.139471	0.663713
131601	TPRA1	0.150274	0.249959	0	0	0.663352
257397	TAB3	0.201038	0.334307	0.0048	0.0771842	0.662907
9854	C2CD2L	0.119025	0.197916	0.0258	0.193442	0.662821
149373	FLJ30430	0.160092	0.266144	0.0126	0.13374	0.66244
10988	METAP2	0.1255	0.208591	0.0102	0.118444	0.662077
81061	OR11H1	0.169472	0.28167	0.0084	0.105633	0.662041
5532	PPP3CB	0.167115	0.277732	0.0096	0.113371	0.661918
100506275	KRBOX1-AS1	0.232937	0.387079	0.0214	0.175872	0.661731
26010	SPATS2L	0.158622	0.263567	0.002	0.0466434	0.661605
84925	DIRC2	0.156071	0.259226	0.0142	0.142384	0.660943
10300	KATNB1	0.15606	0.25917	0	0	0.660708
7884	SLBP	0.107592	0.178592	0.0002	0.00896505	0.65991
8867	SYNJ1	0.135663	0.225143	0.0096	0.113371	0.659577
3158	HMGCS2	0.191298	0.317391	0.017	0.157224	0.659148
3687	ITGAX	0.28738	0.476743	0.0056	0.0847368	0.65893
729970	LOC729970	0.196386	0.325695	0.001	0.0295133	0.658447
8569	MKNK1	0.133188	0.220848	0.0034	0.0634882	0.658166
134526	ACOT12	0.221098	0.366583	0.0222	0.179232	0.65801
3360	HTR4	0.0584198	0.0968452	0.0304	0.211658	0.657744
138240	C9orf57	0.128326	0.212714	0.0184	0.164251	0.657612
140735	DYNLL2	0.197463	0.327293	0.0004	0.0154398	0.657488
118611	C10orf90	0.205877	0.341203	0.014	0.141228	0.657316
51380	CSAD	0.183526	0.304137	0.0002	0.00896505	0.657185
7789	ZXDA	0.169871	0.2815	0.0156	0.150364	0.657138
6386	SDCBP	0.158347	0.262392	0	0	0.657073
375940	FLJ46361	0.13667	0.226439	0.0566	0.293289	0.656825
386627	FLJ38109	0.157758	0.261283	0.0012	0.0336303	0.656229
4835	NQO2	0.306171	0.507072	0.044	0.256538	0.656174
610	HCN2	0.108777	0.180082	0	0	0.655513
23469	PHF3	0.194682	0.322271	0.0136	0.139471	0.655371
91181	NUP210L	0.232539	0.38489	0.0068	0.0943344	0.655167
389715	FAM205B	0.138714	0.229465	0.0232	0.182653	0.654224
728609	SDHAP3	0.163204	0.269902	0.089	0.367352	0.653769
64397	ZFP106	0.230018	0.380288	0.0016	0.0404856	0.653298
23060	ZNF609	0.108332	0.179074	0.0164	0.154154	0.653017
5366	PMAIP1	0.392955	0.649537	0.033	0.218818	0.652955
81606	LBH	0.254723	0.420967	0.0116	0.127508	0.652649
55101	ATP5SL	0.169681	0.280406	0.0278	0.201287	0.652549
4763	NF1	0.19395	0.320479	0.01	0.116854	0.652378
1603	DAD1	0.214072	0.353634	0.0128	0.134578	0.651939
50489	CD207	0.128256	0.211699	0.0008	0.0252652	0.650595
5673	PSG5	0.13421	0.22148	0.0042	0.0716837	0.650247
57761	TRIB3	0.199199	0.328689	0.0212	0.174659	0.650052
8452	CUL3	0.168301	0.27768	0.0296	0.208174	0.649899
4190	MDH1	0.12523	0.206608	0.0024	0.0517723	0.649826
10004	NAALADL1	0.205979	0.339734	0.0004	0.0154398	0.649363
10392	NOD1	0.18478	0.304764	0.0068	0.0943344	0.649334
100528032	KLRC4-KLRK1	0.301719	0.497447	0.0558	0.29159	0.648709
10904	BLCAP	0.180042	0.296833	0	0	0.648684
7484	WNT9B	0.153599	0.253214	0.0006	0.0206289	0.648539
338442	HCAR2	0.141644	0.233453	0.0072	0.0971359	0.648164
112714	TUBA3E	0.186493	0.30733	0.0032	0.0615456	0.647946
375790	AGRN	0.224709	0.370251	0.0022	0.0491756	0.647691
51054	PLEKHA8P1	0.213244	0.351334	0.0032	0.0615456	0.647567
2059	EPS8	0.210131	0.346177	0.0006	0.0206289	0.647437
26818	SNORD33	0.120577	0.198637	0.0024	0.0517723	0.647389
7337	UBE3A	0.117816	0.194056	0	0	0.647114
80213	TM2D3	0.149216	0.24576	0.0134	0.138185	0.647008
23254	KAZN	0.151747	0.249916	0.0028	0.0570085	0.646932
11178	LZTS1	0.137124	0.22574	0.0122	0.131418	0.64625
146822	CDRT15	0.273519	0.450263	0.0152	0.148309	0.646188
80210	ARMC9	0.214961	0.35386	0.0292	0.206844	0.646163
9703	KIAA0100	0.151069	0.248537	0.0048	0.0771842	0.645188
29889	GNL2	0.207615	0.34151	0.0002	0.00896505	0.644914
780776	FAM18A	0.198708	0.326784	0.0074	0.0982444	0.644545
4282	MIF	0.23894	0.392741	0.0004	0.0154398	0.643683
26505	CNNM3	0.11977	0.196848	0.012	0.130104	0.643553
23082	PPRC1	0.14821	0.24358	0.0046	0.0751273	0.643476
3417	IDH1	0.191187	0.31402	0.0218	0.177411	0.642472
54622	ARL15	0.234018	0.384352	0.0652	0.314223	0.642403
2040	STOM	0.193969	0.318535	0.0024	0.0517723	0.64219
7058	THBS2	0.418618	0.687332	0.0362	0.231189	0.641905
84908	FAM136A	0.161207	0.26461	0.0134	0.138185	0.641426
158248	TTC16	0.14693	0.241173	0.0086	0.106859	0.641408
23768	FLRT2	0.213409	0.350108	0.0126	0.13374	0.640553
51339	DACT1	0.260379	0.42708	0.0058	0.0864298	0.640226
57158	JPH2	0.0960139	0.157468	0.0244	0.187584	0.640053
9238	TBRG4	0.0837781	0.137399	0.0244	0.187584	0.640033
54360	CYTL1	0.275071	0.450954	0.009	0.110026	0.63941
7844	RNF103	0.147889	0.242296	0.0044	0.0732967	0.638366
3270	HRC	0.264486	0.433316	0.0028	0.0570085	0.638334
399694	SHC4	0.182167	0.298386	0	0	0.637978
56898	BDH2	0.194326	0.318128	0.0002	0.00896505	0.637082
3171	FOXA3	0.18693	0.305922	0.0116	0.127508	0.636557
26873	OPLAH	0.216306	0.353975	0.0334	0.219616	0.636455
10625	IVNS1ABP	0.130411	0.213363	0.0352	0.226976	0.636089
140545	RNF32	0.180533	0.295361	0.0324	0.2175	0.63605
79729	SH3D21	0.140194	0.229347	0.001	0.0295133	0.635929
100653074	LOC100653074	0.130576	0.213542	0.0188	0.166308	0.635391
899	CCNF	0.206067	0.336928	0.0036	0.0656783	0.635039
203547	VMA21	0.145413	0.2377	0.0426	0.25181	0.634654
4171	MCM2	0.113789	0.185999	0.001	0.0295133	0.634597
8818	DPM2	0.171878	0.280886	0.0022	0.0491756	0.634214
79674	VEPH1	0.380687	0.621814	0.0264	0.19548	0.6334
100132341	KIAA0664L3	0.159793	0.260999	0.0086	0.106859	0.633363
22998	LIMCH1	0.235376	0.384443	0.0002	0.00896505	0.633315
339976	TRIML1	0.18403	0.300566	0.0124	0.132545	0.633246
26814	SNORD36B	0.183965	0.300337	0.003	0.0588529	0.632571
55384	MEG3	0.178081	0.290723	0.0234	0.183794	0.632527
30001	ERO1L	0.315393	0.514672	0.0138	0.140229	0.631843
84279	PRADC1	0.103173	0.168339	0.0536	0.285279	0.631622
81932	HDHD3	0.170799	0.278546	0.0034	0.0634882	0.630842
391322	LOC391322	0.420403	0.685376	0.0034	0.0634882	0.630285
114294	LACTB	0.141059	0.229963	0.001	0.0295133	0.630256
84532	ACSS1	0.259275	0.422671	0.0006	0.0206289	0.630206
100507205	LOC100507205	0.181385	0.295584	0.0004	0.0154398	0.62959
2134	EXTL1	0.184188	0.300135	0	0	0.629505
22899	ARHGEF15	0.130324	0.212241	0.0212	0.174659	0.628568
5330	PLCB2	0.126922	0.206655	0.0002	0.00896505	0.628207
6641	SNTB1	0.316425	0.515182	0.012	0.130104	0.628134
619383	SCARNA9	0.198056	0.322356	0.01	0.116854	0.627606
4661	MYT1	0.145214	0.236344	0.0016	0.0404856	0.627554
51015	ISOC1	0.229422	0.373186	0.004	0.0698429	0.626638
100507040	LINC00427	0.152318	0.24772	0.0182	0.163428	0.626329
100507267	LOC100507267	0.150279	0.24438	0.015	0.147132	0.626179
29880	ALG5	0.1156	0.187985	0.0192	0.166924	0.62617
11275	KLHL2	0.169707	0.275908	0.0024	0.0517723	0.625791
7353	UFD1L	0.0998184	0.162233	0.0372	0.234522	0.625283
3823	KLRC3	0.496536	0.806915	0.0016	0.0404856	0.625087
56244	BTNL2	0.249738	0.405825	0.0006	0.0206289	0.625003
81558	FAM117A	0.194812	0.316567	0.014	0.141228	0.62499
55644	OSGEP	0.205644	0.334079	0.0116	0.127508	0.624554
1128	CHRM1	0.156509	0.254243	0.0118	0.128773	0.624467
145389	SLC38A6	0.143721	0.233468	0.0246	0.188427	0.624455
29883	CNOT7	0.101264	0.164496	0.031	0.213077	0.624418
339448	C1orf174	0.213025	0.346012	0.0044	0.0732967	0.624282
22881	ANKRD6	0.172544	0.280219	0.0318	0.215555	0.624046
373	TRIM23	0.205005	0.332909	0.0082	0.104698	0.623908
256302	C17orf103	0.0783622	0.127198	0.0896	0.368181	0.623204
4678	NASP	0.135041	0.219173	0.0064	0.0909029	0.623013
55502	HES6	0.247714	0.40189	0.0142	0.142384	0.622399
29078	NDUFAF4	0.137705	0.223404	0.0216	0.176906	0.622331
134430	WDR36	0.220455	0.357651	0.0172	0.158196	0.622331
84078	KBTBD7	0.210473	0.341435	0.0094	0.112523	0.622228
23409	SIRT4	0.176283	0.285965	0.003	0.0588529	0.622198
406896	MIR103A2	0.306232	0.496756	0.026	0.194417	0.622158
80070	ADAMTS20	0.0867225	0.140612	0.0012	0.0336303	0.621397
1645	AKR1C1	0.361936	0.586773	0.002	0.0466434	0.621204
2819	GPD1	0.150016	0.243188	0.0194	0.16744	0.62108
7155	TOP2B	0.19692	0.319221	0.0004	0.0154398	0.621065
6006	RHCE	0.287136	0.464955	0.0062	0.0895884	0.619285
151613	TTC14	0.148623	0.24064	0.0034	0.0634882	0.619128
10223	GPA33	0.188463	0.305139	0.0066	0.092561	0.619094
10165	SLC25A13	0.137472	0.222537	0.022	0.178516	0.618788
56658	TRIM39	0.0927895	0.150183	0.0166	0.154726	0.61853
8290	HIST3H3	0.192862	0.31211	0.0376	0.235973	0.618313
220382	FAM181B	0.164796	0.266623	0.034	0.222159	0.617899
7917	BAG6	0.0895438	0.144862	0.0088	0.108777	0.617775
84541	KBTBD8	0.181665	0.293831	0.0278	0.201287	0.61743
10716	TBR1	0.258025	0.417306	0.0092	0.111247	0.617308
9168	TMSB10	0.0756831	0.122396	0.008	0.103251	0.617222
260294	NSUN5P2	0.126317	0.204255	0.0076	0.100024	0.617
3107	HLA-C	0.426189	0.689052	0.0022	0.0491756	0.616776
90557	CCDC74A	0.128226	0.207281	0.0178	0.16105	0.616533
157773	C8orf48	0.220704	0.356748	0.0036	0.0656783	0.616408
3682	ITGAE	0.127882	0.206641	0.0052	0.0814178	0.615877
10421	CD2BP2	0.159262	0.2573	0.0144	0.143527	0.61558
2249	FGF4	0.140575	0.227083	0.0034	0.0634882	0.61539
1004	CDH6	0.169077	0.27307	0.0394	0.242702	0.615061
84672	TTTY6	0.122219	0.197375	0.0076	0.100024	0.614937
9145	SYNGR1	0.0937122	0.151321	0.0306	0.212341	0.614744
257044	C1orf101	0.252471	0.407633	0.01	0.116854	0.614574
100506088	LOC100506088	0.192298	0.310456	0.0128	0.134578	0.614456
55552	ZNF823	0.149645	0.241588	0.0082	0.104698	0.614408
54704	PDP1	0.143103	0.231007	0.0058	0.0864298	0.614274
64431	ACTR6	0.114462	0.184767	0.0204	0.171716	0.614227
285521	COX18	0.147492	0.238084	0.001	0.0295133	0.614209
54498	SMOX	0.129943	0.209749	0.0104	0.119518	0.614162
51200	CPA4	0.282626	0.456022	0.003	0.0588529	0.613517
4613	MYCN	0.253689	0.409287	0.0756	0.337789	0.613339
100288801	FRG2C	0.15601	0.251648	0.0232	0.182653	0.613026
80305	TRABD	0.0724504	0.116834	0.0178	0.16105	0.612605
7307	U2AF1	0.154385	0.248954	0.0006	0.0206289	0.612551
2671	GFER	0.156635	0.252568	0.0244	0.187584	0.612461
1910	EDNRB	0.259564	0.418492	0.0036	0.0656783	0.612287
6988	TCTA	0.128578	0.207171	0	0	0.611241
22847	ZNF507	0.191179	0.307906	0.056	0.292086	0.610565
57711	ZNF529	0.19423	0.312817	0.0042	0.0716837	0.610552
57688	ZSWIM6	0.188782	0.304028	0.101	0.388238	0.610471
100134713	LOC100134713	0.182376	0.293675	0.0078	0.101455	0.61027
255919	TMEM188	0.123227	0.198427	0.0002	0.00896505	0.610263
79591	C10orf76	0.247969	0.399286	0.004	0.0698429	0.610225
286256	LCN12	0.269677	0.434192	0.0004	0.0154398	0.610044
125981	ACER1	0.171992	0.276897	0.0034	0.0634882	0.609941
3662	IRF4	0.158637	0.255299	0.0074	0.0982444	0.609331
79767	ELMO3	0.201834	0.324772	0.0062	0.0895884	0.609105
8482	SEMA7A	0.366161	0.589117	0.0038	0.0676254	0.608904
283212	KLHL35	0.156132	0.251006	0.0064	0.0909029	0.607649
8891	EIF2B3	0.174264	0.280067	0.0152	0.148309	0.607141
81029	WNT5B	0.181853	0.292132	0.0262	0.195038	0.606419
3484	IGFBP1	0.176367	0.28329	0.003	0.0588529	0.606252
255231	MCOLN2	0.317382	0.509779	0.0024	0.0517723	0.6062
165057	FLJ39061	0.238483	0.383036	0.0198	0.169142	0.606136
81706	PPP1R14C	0.276277	0.443712	0.0006	0.0206289	0.606039
6738	TROVE2	0.158273	0.25419	0	0	0.606025
64897	C12orf43	0.138013	0.221573	0	0	0.605458
8321	FZD1	0.222431	0.357047	0.0004	0.0154398	0.605199
8864	PER2	0.0889436	0.142757	0.1654	0.493124	0.605029
2631	GBAS	0.180777	0.290147	0.0108	0.122095	0.605
840	CASP7	0.224357	0.359836	0.0322	0.216593	0.603857
1733	DIO1	0.154241	0.247379	0.0016	0.0404856	0.603846
2288	FKBP4	0.18329	0.293918	0.009	0.110026	0.60357
158293	FAM120AOS	0.136056	0.218147	0.001	0.0295133	0.603364
84923	FAM104A	0.149559	0.239682	0.0046	0.0751273	0.602588
734	OSGIN2	0.146736	0.235145	0.0224	0.179232	0.602499
677775	SCARNA5	0.131678	0.211013	0.004	0.0698429	0.602491
55686	MREG	0.256594	0.41095	0.032	0.215945	0.601559
6654	SOS1	0.259231	0.41515	0.0002	0.00896505	0.601471
23309	SIN3B	0.125965	0.20172	0.0018	0.0435	0.601393
54553	DKFZP434I0714	0.225145	0.36053	0.0104	0.119518	0.60132
596	BCL2	0.15492	0.247983	0.003	0.0588529	0.600716
861	RUNX1	0.1611	0.257717	0.016	0.152109	0.59973
55885	LMO3	0.184326	0.294842	0.0022	0.0491756	0.599565
23075	SWAP70	0.256383	0.410078	0.0098	0.115162	0.599473
121665	SPPL3	0.187924	0.300403	0.0054	0.083144	0.598536
4007	PRICKLE3	0.119412	0.190844	0.0184	0.164251	0.598197
56256	SERTAD4	0.319343	0.510303	0.0038	0.0676254	0.597981
55905	RNF114	0.104792	0.167423	0.0338	0.221286	0.597668
56852	RAD18	0.235522	0.376171	0.0008	0.0252652	0.597177
51298	THEG	0.111903	0.17871	0.0408	0.247127	0.59701
1874	E2F4	0.11908	0.19016	0.0032	0.0615456	0.596911
79660	PPP1R3B	0.239674	0.382632	0.016	0.152109	0.596472
9844	ELMO1	0.120285	0.192024	0.0146	0.144741	0.596409
7105	TSPAN6	0.152675	0.243712	0.0002	0.00896505	0.596276
100505955	LOC100505955	0.11561	0.184476	0.0172	0.158196	0.595679
170960	ZNF721	0.453234	0.723165	0.0078	0.101455	0.595566
540	ATP7B	0.131633	0.210019	0.0162	0.153312	0.595486
93621	MRFAP1	0.180126	0.287367	0.006	0.0879174	0.595368
50615	IL21R	0.209229	0.333792	0.0208	0.17316	0.595343
847	CAT	0.250649	0.399819	0.0048	0.0771842	0.595134
140689	CBLN4	0.239602	0.382158	0.0002	0.00896505	0.594967
10201	NME6	0.113756	0.181409	0.0004	0.0154398	0.594727
164832	LONRF2	0.336655	0.536859	0.0326	0.217965	0.594685
54549	SDK2	0.165355	0.263682	0.0002	0.00896505	0.594648
84850	GLIS3-AS1	0.152522	0.243187	0.027	0.198337	0.594443
5028	P2RY1	0.284841	0.454148	0.0016	0.0404856	0.594389
79639	TMEM53	0.126985	0.202381	0.017	0.157224	0.593739
339807	LOC339807	0.18595	0.296291	0	0	0.59339
130162	C2orf63	0.210026	0.334473	0.0102	0.118444	0.59253
143884	CWF19L2	0.259657	0.413445	0.0012	0.0336303	0.592272
100499483	C9orf174	0.228521	0.363791	0.0044	0.0732967	0.591937
9637	FEZ2	0.156564	0.249187	0.0018	0.0435	0.591593
55593	OTUD5	0.149492	0.23789	0.0016	0.0404856	0.591327
63977	PRDM15	0.147282	0.234372	0.0018	0.0435	0.591313
57404	CYP20A1	0.103041	0.163957	0.026	0.194417	0.591188
150759	LINC00342	0.16622	0.264479	0.005	0.0794805	0.591137
389766	C9orf153	0.222912	0.354677	0.0124	0.132545	0.591112
196792	FAM24B	0.220044	0.35011	0.006	0.0879174	0.591093
137362	GOT1L1	0.184259	0.292981	0.0156	0.150364	0.590051
6125	RPL5	0.173254	0.275481	0.0002	0.00896505	0.590042
53371	NUP54	0.197813	0.314528	0.0192	0.166924	0.590027
9708	PCDHGA8	0.124053	0.197241	0.0224	0.179232	0.589981
221322	C6orf170	0.158917	0.252666	0.0008	0.0252652	0.589926
5723	PSPH	0.183234	0.291326	0.0114	0.126561	0.589916
4883	NPR3	0.220422	0.350391	0.0578	0.295649	0.589635
79037	PVRIG	0.145407	0.231132	0.002	0.0466434	0.589556
117166	WFIKKN1	0.333896	0.530708	0.0042	0.0716837	0.589438
549	AUH	0.125588	0.199562	0.0604	0.302908	0.589021
23354	HAUS5	0.245457	0.389839	0.0072	0.0971359	0.588216
23261	CAMTA1	0.119268	0.189398	0.0018	0.0435	0.588007
25865	PRKD2	0.227831	0.361709	0.0072	0.0971359	0.58762
90459	ERI1	0.219908	0.349068	0.0138	0.140229	0.587333
5166	PDK4	0.430426	0.683194	0.01	0.116854	0.587251
9446	GSTO1	0.214447	0.340379	0.0006	0.0206289	0.587237
151534	LOC151534	0.117153	0.185941	0.0026	0.0546721	0.587167
128497	SPATA25	0.296455	0.470519	0.0126	0.13374	0.587151
998	CDC42	0.113854	0.180695	0.0154	0.149126	0.587074
85509	MBD3L1	0.21811	0.346146	0.0162	0.153312	0.587026
7334	UBE2N	0.0839005	0.133134	0.0084	0.105633	0.586805
347127	FAM75D5	0.118233	0.187564	0.0116	0.127508	0.586392
643406	LOC643406	0.12744	0.202144	0.0006	0.0206289	0.586197
59307	SIGIRR	0.322926	0.512115	0.0002	0.00896505	0.585857
8857	FCGBP	0.489475	0.776219	0.0084	0.105633	0.58582
11243	PMF1	0.163972	0.259997	0.0026	0.0546721	0.585622
10587	TXNRD2	0.194413	0.308194	0.0514	0.279913	0.585256
159	ADSS	0.151637	0.240381	0.0066	0.092561	0.58524
402778	IFITM10	0.191309	0.30326	0.003	0.0588529	0.585183
10465	PPIH	0.164589	0.260874	0.0634	0.310483	0.585005
9383	TSIX	0.739162	1.17121	0.0182	0.163428	0.58451
9695	EDEM1	0.182172	0.288615	0.0538	0.285796	0.584301
745	C11orf9	0.228451	0.361822	0.0008	0.0252652	0.583805
247	ALOX15B	0.406622	0.643933	0.0056	0.0847368	0.583617
340061	TMEM173	0.195397	0.309309	0.004	0.0698429	0.582979
150763	GPAT2	0.229054	0.362473	0.0024	0.0517723	0.58248
63943	FKBPL	0.122422	0.193649	0.05	0.275802	0.581814
84951	TNS4	0.197254	0.312004	0.0002	0.00896505	0.581739
83464	APH1B	0.106434	0.168352	0.0086	0.106859	0.581738
54815	GATAD2A	0.166009	0.262569	0.0072	0.0971359	0.581648
284661	LOC284661	0.152788	0.24163	0.001	0.0295133	0.581472
240	ALOX5	0.557085	0.880516	0.0374	0.23516	0.580577
2746	GLUD1	0.229852	0.363279	0.021	0.173957	0.580489
23583	SMUG1	0.134323	0.212239	0.0052	0.0814178	0.580068
284129	SLC26A11	0.161744	0.255545	0.0142	0.142384	0.579935
23141	ANKLE2	0.142877	0.22573	0.006	0.0879174	0.579891
3512	IGJ	0.179939	0.284284	0.0068	0.0943344	0.579885
2703	GJA8	0.182162	0.287597	0.0218	0.177411	0.578794
84133	ZNRF3	0.185767	0.293287	0.0054	0.083144	0.578786
26985	AP3M1	0.166163	0.262322	0.0014	0.0375322	0.5787
27067	STAU2	0.182131	0.287509	0.0652	0.314223	0.578587
6363	CCL19	0.396705	0.626141	0.013	0.135909	0.578355
141	ADPRH	0.16876	0.266321	0.0044	0.0732967	0.578105
100129460	DPY19L1P1	0.268921	0.424356	0.0434	0.254553	0.577994
56920	SEMA3G	0.28925	0.456325	0.0022	0.0491756	0.577614
257202	GPX6	0.204954	0.323194	0.0024	0.0517723	0.576914
23484	LEPROTL1	0.0978774	0.154344	0.023	0.181593	0.576909
27112	FAM155B	0.158772	0.250288	0.0252	0.191178	0.576402
162655	ZNF519	0.212367	0.33475	0.0076	0.100024	0.576285
5542	PRB1	0.118789	0.187244	0.0128	0.134578	0.576272
90203	SNX21	0.11007	0.173479	0.0108	0.122095	0.57608
4016	LOXL1	0.169098	0.266352	0.0072	0.0971359	0.57513
4435	CITED1	0.357819	0.56349	0.0092	0.111247	0.57479
27231	ITGB1BP3	0.128041	0.201632	0.027	0.198337	0.574747
9630	GNA14	0.403325	0.635022	0	0	0.574467
6525	SMTN	0.0894616	0.140808	0.0146	0.144741	0.573946
729852	LOC729852	0.19241	0.30274	0.0368	0.23359	0.573412
90024	FLJ20021	0.217732	0.34256	0.0108	0.122095	0.573311
29920	PYCR2	0.127602	0.200738	0.0004	0.0154398	0.57316
51255	RNF181	0.1245	0.195809	0.0152	0.148309	0.57276
123283	TARSL2	0.154404	0.242815	0.0426	0.25181	0.572597
6781	STC1	0.327146	0.514406	0.0054	0.083144	0.572404
26191	PTPN22	0.100606	0.158187	0.0286	0.204592	0.572341
199857	ALG14	0.150046	0.235862	0.0044	0.0732967	0.571933
339479	FAM5C	0.272336	0.427974	0.0052	0.0814178	0.571494
6820	SULT2B1	0.260343	0.408982	0.0038	0.0676254	0.570937
7089	TLE2	0.16686	0.262091	0.0118	0.128773	0.570726
7775	ZNF232	0.184011	0.289011	0.0072	0.0971359	0.570618
112936	VPS26B	0.104073	0.163391	0.0092	0.111247	0.56997
51279	C1RL	0.26011	0.408333	0.003	0.0588529	0.569846
643641	ZNF862	0.153962	0.241692	0.003	0.0588529	0.569816
10285	SMNDC1	0.147252	0.231085	0.0434	0.254553	0.56932
84058	WDR54	0.132738	0.208238	0.0146	0.144741	0.568782
64223	MLST8	0.127578	0.20013	0.0026	0.0546721	0.568688
440823	MIAT	0.24257	0.380492	0.0404	0.246134	0.568584
388722	C1orf53	0.186856	0.293039	0.006	0.0879174	0.568262
201161	CENPV	0.194954	0.305715	0.033	0.218818	0.568143
2170	FABP3	0.335522	0.526113	0.002	0.0466434	0.568041
127544	RNF19B	0.222937	0.349538	0.0552	0.289817	0.567878
80835	TAS1R1	0.15021	0.235499	0.0286	0.204592	0.567804
57175	CORO1B	0.107556	0.168605	0.0084	0.105633	0.567602
56605	ERO1LB	0.251902	0.39486	0.0144	0.143527	0.567516
9782	MATR3	0.0986748	0.154645	0.0094	0.112523	0.567217
6328	SCN3A	0.281075	0.440455	0.0076	0.100024	0.567035
353143	LCE3B	0.141621	0.221918	0.0094	0.112523	0.56698
8455	ATRN	0.0915152	0.143398	0.0474	0.268203	0.566933
285126	DNAJC5G	0.165161	0.258796	0.0028	0.0570085	0.566928
115	ADCY9	0.198696	0.311289	0.008	0.103251	0.566659
23216	TBC1D1	0.117595	0.184219	0.0184	0.164251	0.566547
57047	PLSCR2	0.318031	0.498177	0.0034	0.0634882	0.566441
284106	CISD3	0.081066	0.126966	0.0186	0.165504	0.566208
6810	STX4	0.166074	0.260099	0.0012	0.0336303	0.566165
389792	IER5L	0.250923	0.392972	0.0436	0.254919	0.566105
122769	LRR1	0.149784	0.234544	0.0006	0.0206289	0.565884
6259	RYK	0.193537	0.303012	0.001	0.0295133	0.565655
729747	ZNF878	0.22668	0.354903	0.0288	0.205319	0.565655
389898	UBE2NL	0.216348	0.338714	0.0002	0.00896505	0.565598
347736	NME9	0.185088	0.289738	0.0158	0.151069	0.565403
64794	DDX31	0.0997044	0.156044	0.0114	0.126561	0.565071
100507408	LOC100507408	0.227718	0.356375	0.0062	0.0895884	0.564983
79085	SLC25A23	0.106161	0.1661	0.0204	0.171716	0.564612
27018	NGFRAP1	0.108354	0.169501	0.0466	0.26566	0.56433
51434	ANAPC7	0.127289	0.199115	0.002	0.0466434	0.56427
7156	TOP3A	0.16755	0.262029	0.002	0.0466434	0.563884
81851	KRTAP1-1	0.152257	0.238104	0.0296	0.208174	0.563827
7326	UBE2G1	0.132409	0.207053	0.051	0.278919	0.563736
9242	MSC	0.238038	0.372102	0.0328	0.218601	0.563202
285955	SPDYE1	0.156528	0.244675	0.1046	0.39426	0.563138
393046	OR2A5	0.283115	0.44253	0.0226	0.180227	0.563074
3476	IGBP1	0.14944	0.233506	0.0152	0.148309	0.562539
23090	ZNF423	0.279679	0.436998	0.0838	0.357474	0.562499
56950	SMYD2	0.18228	0.284747	0.018	0.162068	0.562142
2892	GRIA3	0.127779	0.199569	0.023	0.181593	0.561835
11341	SCRG1	0.295454	0.461382	0.0172	0.158196	0.561606
5073	PARN	0.10253	0.160096	0.0176	0.160197	0.56145
646074	POM121L10P	0.167969	0.262244	0.032	0.215945	0.561267
23176	Septin 8	0.139981	0.218522	0.0706	0.325568	0.561079
3845	KRAS	0.161143	0.251554	0.0166	0.154726	0.561059
92745	SLC38A5	0.128346	0.200352	0.0166	0.154726	0.561029
23187	PHLDB1	0.107743	0.168165	0.0124	0.132545	0.560802
23001	WDFY3	0.0491843	0.0767391	0.0144	0.143527	0.560236
79157	MFSD11	0.186242	0.290576	0.0086	0.106859	0.560207
51426	POLK	0.145068	0.226333	0.0006	0.0206289	0.560192
5891	MOK	0.268714	0.419216	0.0206	0.172616	0.560082
10139	ARFRP1	0.1383	0.215751	0.0172	0.158196	0.560022
27086	FOXP1	0.184137	0.287249	0.0552	0.289817	0.559973
7037	TFRC	0.334325	0.521479	0.0112	0.125426	0.559796
51629	SLC25A39	0.127795	0.199092	0.015	0.147132	0.557904
57172	CAMK1G	0.186339	0.290298	0.0014	0.0375322	0.5579
115201	ATG4A	0.126493	0.19706	0.0084	0.105633	0.557868
150776	LOC150776	0.194235	0.302579	0.0556	0.291184	0.557799
30837	SOCS7	0.192374	0.299661	0.0236	0.184669	0.557704
10936	GPR75	0.301906	0.470169	0	0	0.557336
4053	LTBP2	0.175654	0.273522	0.0178	0.16105	0.557164
83844	USP26	0.16062	0.250111	0.0282	0.202862	0.557157
6491	STIL	0.187041	0.291195	0.0096	0.113371	0.556851
25792	CIZ1	0.109803	0.170849	0.0046	0.0751273	0.555961
28956	LAMTOR2	0.133587	0.207848	0.0068	0.0943344	0.555901
219927	MRPL21	0.232288	0.36132	0.0072	0.0971359	0.555484
7818	DAP3	0.203584	0.316622	0.0118	0.128773	0.555242
219988	PATL1	0.227323	0.353355	0.0108	0.122095	0.554419
3747	KCNC2	0.172337	0.267827	0.0148	0.145943	0.554092
327	APEH	0.12637	0.196355	0.026	0.194417	0.553814
54852	PAQR5	0.24475	0.380256	0.0408	0.247127	0.553648
170302	ARX	0.186708	0.290051	0.0146	0.144741	0.553503
7164	TPD52L1	0.146788	0.227897	0.0228	0.181129	0.552554
1314	COPA	0.16034	0.24893	0.0318	0.215555	0.552511
55588	MED29	0.224076	0.347865	0.016	0.152109	0.552442
56729	RETN	0.165859	0.257474	0	0	0.552363
2962	GTF2F1	0.128975	0.200213	0.0098	0.115162	0.552337
4025	LPO	0.0839448	0.130308	0.1304	0.442405	0.552308
4352	MPL	0.195885	0.304039	0.0372	0.234522	0.552132
54503	ZDHHC13	0.119823	0.185981	0.0318	0.215555	0.552123
7750	ZMYM2	0.125583	0.194898	0.0132	0.137226	0.551939
7481	WNT11	0.168332	0.261173	0.0002	0.00896505	0.551538
5066	PAM	0.186607	0.289505	0.0018	0.0435	0.551416
56893	UBQLN4	0.150798	0.233947	0.01	0.116854	0.551386
11238	CA5B	0.254447	0.394691	0.0236	0.184669	0.551175
881	CCIN	0.242744	0.376515	0.0038	0.0676254	0.551081
138724	C9orf131	0.212756	0.329969	0.0436	0.254919	0.550929
112770	C1orf85	0.0727452	0.112768	0.095	0.378253	0.550179
5711	PSMD5	0.132537	0.205451	0.0156	0.150364	0.550143
51307	FAM53C	0.108911	0.168804	0.0022	0.0491756	0.549929
390264	OR10G4	0.123094	0.190775	0.051	0.278919	0.549824
64798	DEPTOR	0.244585	0.379034	0.0382	0.237592	0.5497
23479	ISCU	0.236035	0.365681	0.1056	0.396595	0.549267
80727	TTYH3	0.212457	0.329152	0.0124	0.132545	0.549266
89958	C9orf140	0.169788	0.263031	0.0164	0.154154	0.549169
392360	CTSL3	0.174697	0.270592	0.0372	0.234522	0.548924
2065	ERBB3	0.246249	0.381371	0.0042	0.0716837	0.548722
167359	NIM1	0.207013	0.320579	0.0062	0.0895884	0.548593
7531	YWHAE	0.191328	0.296238	0.0298	0.209051	0.548326
58511	DNASE2B	0.170166	0.263468	0.0646	0.312868	0.548305
11245	GPR176	0.21169	0.32771	0.0422	0.250779	0.548068
6866	TAC3	0.318976	0.493734	0.0068	0.0943344	0.547873
388610	TRNP1	0.200662	0.310596	0.02	0.16998	0.547858
286148	DPY19L4	0.188854	0.292266	0.037	0.234235	0.547575
4889	NPY5R	0.176758	0.273521	0.0152	0.148309	0.547427
26173	INTS1	0.126019	0.194995	0.0222	0.179232	0.547339
121551	BTBD11	0.177387	0.274417	0.0146	0.144741	0.547003
2168	FABP1	0.290401	0.449225	0.0764	0.339725	0.546913
389072	PLEKHM3	0.182444	0.282162	0.0136	0.139471	0.546565
539	ATP5O	0.122728	0.189772	0	0	0.546281
58487	CREBZF	0.122729	0.189772	0.0332	0.218818	0.546265
1289	COL5A1	0.149036	0.230437	0.019	0.16675	0.546182
253558	LCLAT1	0.164093	0.253696	0.0056	0.0847368	0.546057
54957	TXNL4B	0.175039	0.270611	0	0	0.546004
8635	RNASET2	0.187887	0.290472	0.0052	0.0814178	0.545997
10445	MCRS1	0.12559	0.194125	0.0654	0.315004	0.545703
23732	C9orf4	0.288004	0.445117	0.0208	0.17316	0.545526
1523	CUX1	0.0583534	0.0901831	0.0594	0.30015	0.545466
339145	FAM92B	0.118061	0.182402	0.0022	0.0491756	0.544978
126074	SWSAP1	0.138734	0.214277	0.0264	0.19548	0.544512
3770	KCNJ14	0.136899	0.211385	0.0026	0.0546721	0.544088
29915	HCFC2	0.189407	0.29244	0.016	0.152109	0.543979
80820	EEPD1	0.165155	0.254954	0.0492	0.273379	0.543722
57560	IFT80	0.199792	0.308422	0.0026	0.0546721	0.543718
1643	DDB2	0.10625	0.164018	0.0976	0.383027	0.543701
51078	THAP4	0.152839	0.235938	0.0184	0.164251	0.543699
60313	GPBP1L1	0.129406	0.199763	0.0176	0.160197	0.543695
23095	KIF1B	0.0762086	0.117611	0.0002	0.00896505	0.543281
55190	NUDT11	0.250467	0.386484	0.0034	0.0634882	0.543052
83869	TTTY14	0.162694	0.250888	0.1018	0.388981	0.542084
55621	TRMT1	0.122237	0.188457	0.0534	0.284942	0.541734
8406	SRPX	0.284673	0.438757	0.0246	0.188427	0.541265
348801	LNP1	0.149456	0.230283	0.0052	0.0814178	0.540808
10361	NPM2	0.127777	0.196877	0.0218	0.177411	0.540789
10577	NPC2	0.183936	0.283304	0	0	0.540231
692312	PPAN-P2RY11	0.0864979	0.133227	0.0134	0.138185	0.540229
80149	ZC3H12A	0.145801	0.224553	0.0178	0.16105	0.540133
629	CFB	0.208581	0.321217	0.0402	0.246134	0.540008
127254	C1orf173	0.196681	0.302857	0.0186	0.165504	0.539841
126272	EID2B	0.139895	0.215416	0.0134	0.138185	0.539835
4807	NHLH1	0.153907	0.236988	0.0128	0.134578	0.539811
4948	OCA2	0.191054	0.294129	0.0078	0.101455	0.539502
284346	ZNF575	0.174386	0.268407	0.0218	0.177411	0.539153
79048	SECISBP2	0.130124	0.200274	0.0312	0.213659	0.5391
79800	ALS2CR8	0.119424	0.183792	0.1098	0.404801	0.538979
10942	PRSS21	0.0829899	0.127693	0.0986	0.384598	0.538651
391112	OR6Y1	0.128202	0.19725	0.0492	0.273379	0.538594
144717	FAM109A	0.185802	0.285804	0.0696	0.323913	0.538217
9536	PTGES	0.252475	0.388354	0.0132	0.137226	0.538185
677807	SNORA22	0.178336	0.274296	0.0104	0.119518	0.538088
10396	ATP8A1	0.118133	0.181699	0.0226	0.180227	0.538085
100130111	LOC100130111	0.113493	0.174547	0.045	0.260186	0.537961
8530	CST7	0.191456	0.294446	0.0052	0.0814178	0.537932
10038	PARP2	0.129093	0.198531	0.01	0.116854	0.537891
25960	GPR124	0.18551	0.28528	0.0024	0.0517723	0.537812
51134	CCDC41	0.161989	0.2491	0.0332	0.218818	0.537757
1917	EEF1A2	0.227386	0.349661	0.002	0.0466434	0.537742
135112	NCOA7	0.124357	0.191222	0.0044	0.0732967	0.537687
51053	GMNN	0.185489	0.285208	0.0314	0.214149	0.537596
152024	LOC152024	0.152059	0.233785	0.0264	0.19548	0.53746
2938	GSTA1	0.48249	0.741791	0.0512	0.279372	0.537422
285000	LOC285000	0.211992	0.325905	0.0176	0.160197	0.537344
23256	SCFD1	0.147148	0.226173	0.0496	0.274595	0.537041
129868	TRIM43	0.253057	0.38891	0.034	0.222159	0.536846
1936	EEF1D	0.147868	0.227251	0.0624	0.307846	0.536846
4126	MANBA	0.190913	0.293395	0.0044	0.0732967	0.536802
55531	ELMOD1	0.162125	0.249151	0.0316	0.214898	0.536784
79789	CLMN	0.17047	0.261955	0.008	0.103251	0.536661
51720	UIMC1	0.0946426	0.145415	0.0008	0.0252652	0.536462
80086	TUBA4B	0.139064	0.213645	0.0006	0.0206289	0.536316
57624	NYAP2	0.123961	0.190384	0.0288	0.205319	0.535839
2239	GPC4	0.228423	0.35081	0.0002	0.00896505	0.535788
113278	C20orf54	0.384151	0.589875	0.0252	0.191178	0.535529
100130301	LOC100130301	0.166696	0.255941	0.0454	0.261411	0.535376
5708	PSMD2	0.123696	0.189912	0.0316	0.214898	0.535312
80831	APOL5	0.130597	0.200498	0.1202	0.425007	0.535245
9412	MED21	0.211843	0.325197	0	0	0.535085
219557	C7orf62	0.161533	0.247966	0.0242	0.186563	0.535084
7283	TUBG1	0.16279	0.249879	0.0268	0.197128	0.534975
2071	ERCC3	0.170009	0.260954	0.0092	0.111247	0.534946
23161	SNX13	0.134352	0.206223	0.018	0.162068	0.53494
3678	ITGA5	0.166382	0.25538	0.0848	0.359532	0.534903
91614	DEPDC7	0.41478	0.636617	0.0082	0.104698	0.53483
55728	N4BP2	0.384061	0.589425	0.0014	0.0375322	0.534716
26589	MRPL46	0.17173	0.263545	0.0066	0.092561	0.534644
119692	OR51S1	0.17066	0.261903	0.0224	0.179232	0.534644
729900	LOC729900	0.171872	0.263664	0.0298	0.209051	0.534072
6483	ST3GAL2	0.142851	0.219139	0.0126	0.13374	0.534036
9677	PPIP5K1	0.169999	0.260705	0.0206	0.172616	0.533568
54857	GDPD2	0.264744	0.405995	0.033	0.218818	0.533534
22869	ZNF510	0.190464	0.292054	0.0466	0.26566	0.533381
4287	ATXN3	0.132743	0.203527	0.0236	0.184669	0.533241
6156	RPL30	0.142499	0.218458	0.0086	0.106859	0.533049
157506	RDH10	0.1974	0.302607	0.0092	0.111247	0.53296
23612	PHLDA3	0.160894	0.24664	0.043	0.253187	0.532932
27324	TOX3	0.234289	0.359107	0.0582	0.296784	0.532749
2956	MSH6	0.130875	0.200541	0.0254	0.191736	0.532307
114899	C1QTNF3	0.135223	0.207189	0.006	0.0879174	0.532206
55607	PPP1R9A	0.237206	0.363433	0.0058	0.0864298	0.532141
6457	SH3GL3	0.178704	0.273793	0.0008	0.0252652	0.532101
5292	PIM1	0.300736	0.460681	0.0556	0.291184	0.531844
25940	FAM98A	0.158614	0.242962	0.0232	0.182653	0.531782
10663	CXCR6	0.22902	0.350787	0.0934	0.374836	0.531685
23613	ZMYND8	0.110074	0.168594	0.0256	0.192897	0.531641
22941	SHANK2	0.157542	0.241289	0.0192	0.166924	0.531581
138948	DBH-AS1	0.26587	0.407179	0.0098	0.115162	0.531497
22897	CEP164	0.21078	0.3228	0.012	0.130104	0.531451
51129	ANGPTL4	0.293023	0.448639	0.0116	0.127508	0.531074
64711	HS3ST6	0.143366	0.21948	0.0624	0.307846	0.530901
1815	DRD4	0.264353	0.404632	0.0062	0.0895884	0.530652
23140	ZZEF1	0.16677	0.255249	0.064	0.311409	0.530545
58497	PRUNE	0.140789	0.215474	0.0336	0.220236	0.530482
7220	TRPC1	0.171692	0.262767	0.0026	0.0546721	0.53045
11068	CYB561D2	0.135347	0.20713	0.051	0.278919	0.530365
3752	KCND3	0.132747	0.203117	0.0072	0.0971359	0.530106
51056	LAP3	0.195328	0.298869	0.0334	0.219616	0.530093
135924	OR9A2	0.146525	0.224175	0.0216	0.176906	0.529944
8605	PLA2G4C	0.354523	0.542342	0.0046	0.0751273	0.529778
5300	PIN1	0.141666	0.216676	0.0086	0.106859	0.529483
2641	GCG	0.317546	0.485674	0.022	0.178516	0.529463
26148	C10orf12	0.191466	0.292836	0.072	0.329383	0.529441
57721	METTL14	0.200056	0.305931	0.005	0.0794805	0.529231
2693	GHSR	0.108629	0.166105	0.0264	0.19548	0.529092
6664	SOX11	0.244355	0.373635	0.0122	0.131418	0.529064
64789	DEM1	0.175214	0.267872	0.01	0.116854	0.528825
54149	C21orf91	0.287341	0.43921	0.0074	0.0982444	0.528534
10015	PDCD6IP	0.145367	0.222156	0.0028	0.0570085	0.528236
51281	ANKMY1	0.105126	0.160657	0.0036	0.0656783	0.528232
54413	NLGN3	0.162562	0.248422	0.0062	0.0895884	0.52817
7201	TRHR	0.188902	0.288617	0.0392	0.241828	0.527869
10399	GNB2L1	0.213421	0.326043	0.0114	0.126561	0.527695
158358	KIAA2026	0.219776	0.33569	0.0048	0.0771842	0.52742
51250	C6orf203	0.115703	0.176709	0.0058	0.0864298	0.527254
154215	NKAIN2	0.228937	0.349575	0.0358	0.229514	0.52695
8514	KCNAB2	0.196185	0.299484	0.0028	0.0570085	0.526536
115110	LOC115110	0.115529	0.176307	0.047	0.266755	0.526082
51338	MS4A4A	0.256884	0.391973	0.069	0.322742	0.525873
4857	NOVA1	0.140971	0.215094	0.0172	0.158196	0.525809
84063	KIRREL2	0.100379	0.153137	0.0118	0.128773	0.525589
7627	ZNF75A	0.215305	0.328444	0.0548	0.288535	0.525483
57475	PLEKHH1	0.175204	0.26724	0.0208	0.17316	0.525313
84193	SETD3	0.0937728	0.143017	0.009	0.110026	0.525147
1028	CDKN1C	0.213924	0.326258	0.0254	0.191736	0.525117
388886	FAM211B	0.159063	0.242574	0.0024	0.0517723	0.525019
199746	U2AF1L4	0.138613	0.211258	0.0328	0.218601	0.524078
57050	UTP3	0.182053	0.27737	0.005	0.0794805	0.523567
905	CCNT2	0.117492	0.178944	0.0102	0.118444	0.523031
4929	NR4A2	0.384758	0.58592	0.0568	0.293414	0.522829
8120	AP3B2	0.175611	0.267411	0.0002	0.00896505	0.52275
427	ASAH1	0.114946	0.174977	0.0066	0.092561	0.522251
2646	GCKR	0.177082	0.26956	0.0216	0.176906	0.522233
388566	ZNF470	0.158152	0.240704	0.0408	0.247127	0.521972
7263	TST	0.199051	0.302767	0.0112	0.125426	0.521052
79862	ZNF669	0.183422	0.278983	0.0404	0.246134	0.520989
8975	USP13	0.0986348	0.150022	0.0194	0.16744	0.520983
205717	KIAA2018	0.15392	0.234031	0.039	0.240861	0.520472
5360	PLTP	0.169529	0.257741	0.0078	0.101455	0.520335
205428	C3orf58	0.17248	0.26222	0.0484	0.271375	0.520289
1639	DCTN1	0.136334	0.207264	0.0016	0.0404856	0.520267
1290	COL5A2	0.327052	0.4972	0.0164	0.154154	0.520249
10475	TRIM38	0.212494	0.323037	0.0194	0.16744	0.520221
25987	TSKU	0.136044	0.206805	0.0488	0.272154	0.520133
79165	LENG1	0.152751	0.232188	0.0732	0.332233	0.52004
79102	RNF26	0.105098	0.159741	0.0574	0.294869	0.519918
219875	OR4D5	0.173007	0.262903	0.0254	0.191736	0.519611
90417	C15orf23	0.171668	0.260859	0.0778	0.343296	0.519552
29098	RANGRF	0.126144	0.191679	0.0064	0.0909029	0.51952
146310	RNF151	0.132546	0.201388	0.0194	0.16744	0.519377
136051	ZNF786	0.233975	0.355486	0.0154	0.149126	0.519335
1677	DFFB	0.22235	0.337809	0.054	0.286312	0.519269
9738	CCP110	0.167023	0.253748	0.0498	0.275611	0.519243
1983	EIF5	0.125584	0.190775	0.0054	0.083144	0.519103
5691	PSMB3	0.148688	0.22587	0.0002	0.00896505	0.519082
100033818	SNORD115-44	0.402978	0.612024	0.0462	0.264102	0.518753
28965	SLC27A6	0.386639	0.587177	0.0128	0.134578	0.518669
2887	GRB10	0.183662	0.278899	0.0286	0.204592	0.518539
7324	UBE2E1	0.226944	0.344602	0.0544	0.287245	0.518446
256355	RPS2P32	0.153376	0.232879	0.0466	0.26566	0.518356
28964	GIT1	0.131114	0.199078	0.0526	0.283028	0.518352
144165	PRICKLE1	0.226789	0.344339	0.0662	0.316935	0.518324
375061	FAM89A	0.277144	0.420779	0.025	0.190354	0.518268
654322	SNORA13	0.22137	0.336072	0.026	0.194417	0.518149
57673	BEND3	0.184395	0.279928	0.043	0.253187	0.518087
246330	PELI3	0.216468	0.32854	0.0204	0.171716	0.517729
23382	AHCYL2	0.12829	0.19468	0.0102	0.118444	0.517505
5118	PCOLCE	0.125454	0.19037	0.0468	0.266254	0.517454
595097	SNORD16	0.283707	0.430465	0.0314	0.214149	0.517287
79035	OBFC2B	0.128134	0.194389	0.0164	0.154154	0.517081
4001	LMNB1	0.448917	0.681009	0.0128	0.134578	0.517004
64097	EPB41L4A	0.185662	0.281626	0.1026	0.390517	0.516876
3750	KCND1	0.195673	0.296806	0.0264	0.19548	0.51685
83478	ARHGAP24	0.122129	0.18525	0.0264	0.19548	0.516838
27101	CACYBP	0.133858	0.203007	0.0886	0.366875	0.516586
1795	DOCK3	0.154301	0.234003	0.0384	0.238303	0.516539
125950	RAVER1	0.135095	0.204876	0.0404	0.246134	0.516533
1407	CRY1	0.242665	0.367998	0.0212	0.174659	0.516484
8128	ST8SIA2	0.203165	0.308077	0.0462	0.264102	0.516386
2735	GLI1	0.197032	0.29875	0.003	0.0588529	0.516253
51729	WBP11	0.119739	0.181536	0.0596	0.300432	0.516095
81931	ZNF93	0.197828	0.299821	0.0188	0.166308	0.515563
153770	PLAC8L1	0.248612	0.376786	0.0056	0.0847368	0.515562
84153	RNASEH2C	0.14173	0.214784	0.0192	0.166924	0.515443
7535	ZAP70	0.0897276	0.135956	0.0558	0.29159	0.515206
1353	COX11	0.286717	0.4344	0.0178	0.16105	0.515084
64926	RASAL3	0.166218	0.251803	0.0262	0.195038	0.514892
55188	RIC8B	0.170916	0.258917	0.0058	0.0864298	0.514875
11318	GPR182	0.214044	0.324241	0.0002	0.00896505	0.514835
284424	MIR7-3HG	0.400925	0.60731	0.0606	0.303364	0.514774
2286	FKBP2	0.0898677	0.136119	0.0706	0.325568	0.514664
1604	CD55	0.206083	0.312138	0.0362	0.231189	0.51462
221421	RSPH9	0.224707	0.340339	0.0098	0.115162	0.514589
6143	RPL19	0.121703	0.184327	0.0508	0.278556	0.514563
6749	SSRP1	0.173195	0.26231	0.0202	0.171243	0.514533
10859	LILRB1	0.344903	0.522239	0.0052	0.0814178	0.514163
79012	CAMKV	0.203529	0.308168	0	0	0.514125
2906	GRIN2D	0.171442	0.259525	0.0158	0.151069	0.513779
6399	TRAPPC2	0.17024	0.257674	0.0142	0.142384	0.513592
390437	OR4N5	0.181502	0.274717	0.1098	0.404801	0.513574
100130700	LOC100130700	0.186182	0.281683	0.0332	0.218818	0.512946
1956	EGFR	0.148183	0.224182	0.0576	0.295169	0.512878
9265	CYTH3	0.143519	0.217115	0.0216	0.176906	0.512799
2949	GSTM5	0.663444	1.00345	0.0242	0.186563	0.512486
51115	FAM82B	0.190868	0.288652	0.0532	0.284787	0.512314
6702	SPRR2C	0.156977	0.237385	0.1154	0.415794	0.512223
10059	DNM1L	0.116889	0.176735	0.0036	0.0656783	0.511993
1356	CP	0.542896	0.820727	0.0164	0.154154	0.511756
2	A2M	0.233663	0.353183	0.092	0.371813	0.511507
150677	OTOS	0.189547	0.286429	0.177	0.506221	0.511125
57669	EPB41L5	0.195053	0.294733	0.0084	0.105633	0.511041
79998	ANKRD53	0.264856	0.400196	0.069	0.322742	0.510994
388558	ZNF808	0.243028	0.367213	0.009	0.110026	0.510988
9321	TRIP11	0.184748	0.279151	0.0742	0.334221	0.51098
23429	RYBP	0.170379	0.257439	0.112	0.409113	0.510971
79178	THTPA	0.146399	0.221202	0.1996	0.532362	0.510951
51460	SFMBT1	0.203471	0.307304	0.0192	0.166924	0.51031
10008	KCNE3	0.259904	0.392506	0.016	0.152109	0.510197
81618	ITM2C	0.175276	0.264689	0.0422	0.250779	0.510129
55504	TNFRSF19	0.178535	0.269498	0.0662	0.316935	0.509497
23098	SARM1	0.106218	0.160323	0.0022	0.0491756	0.509369
6494	SIPA1	0.11126	0.167887	0.0136	0.139471	0.508969
352954	GATS	0.180302	0.272063	0.1446	0.464318	0.50893
5480	PPIC	0.16362	0.246886	0.147	0.467702	0.508894
4232	MEST	0.141007	0.212718	0.05	0.275802	0.508566
7225	TRPC6	0.260612	0.393105	0.0634	0.310483	0.508396
256297	PTF1A	0.210106	0.316918	0.1554	0.480671	0.508373
150000	ABCC13	0.192393	0.290156	0.03	0.209748	0.508139
57128	LYRM4	0.138319	0.208582	0.0892	0.367352	0.507976
84152	PPP1R1B	0.152719	0.230286	0.063	0.309524	0.507907
54936	ADPRHL2	0.118688	0.178935	0.0064	0.0909029	0.507603
7150	TOP1	0.106042	0.159855	0.021	0.173957	0.507463
92667	C20orf72	0.183648	0.276818	0.0284	0.203861	0.507333
249	ALPL	0.142235	0.214355	0.0032	0.0615456	0.507048
2192	FBLN1	0.139931	0.210865	0.0504	0.277001	0.506924
158471	PRUNE2	0.197479	0.29756	0.0504	0.277001	0.506797
7187	TRAF3	0.167675	0.25262	0.0094	0.112523	0.506609
251	ALPPL2	0.123011	0.185326	0.02	0.16998	0.506572
246176	GAS2L2	0.20553	0.309641	0.063	0.309524	0.506552
5336	PLCG2	0.145225	0.218754	0.0214	0.175872	0.506316
113444	C1orf212	0.231652	0.348908	0.0582	0.296784	0.506168
828	CAPS	0.0977444	0.147218	0.0852	0.360495	0.506151
10795	ZNF268	0.283483	0.42695	0.007	0.0963873	0.506086
283050	LOC283050	0.122331	0.184216	0.021	0.173957	0.505888
8578	SCARF1	0.214101	0.322311	0.0002	0.00896505	0.505411
54946	SLC41A3	0.157788	0.237497	0.0242	0.186563	0.505164
64601	VPS16	0.0892892	0.134384	0.021	0.173957	0.505045
9699	RIMS2	0.162621	0.244698	0.0294	0.207643	0.504714
9935	MAFB	0.232869	0.350393	0.014	0.141228	0.504676
200010	SLC5A9	0.147478	0.221888	0.0838	0.357474	0.504555
9804	TOMM20	0.132802	0.19979	0.0998	0.385938	0.504411
2911	GRM1	0.171705	0.258306	0.0364	0.231934	0.504358
10658	CELF1	0.127172	0.191294	0.0956	0.379284	0.504212
201134	CEP112	0.150586	0.226486	0.0146	0.144741	0.504026
2308	FOXO1	0.176369	0.265236	0.009	0.110026	0.503871
57591	MKL1	0.186043	0.279779	0.0054	0.083144	0.503839
54834	GDAP2	0.170368	0.256195	0.072	0.329383	0.503774
51332	SPTBN5	0.139712	0.210081	0.002	0.0466434	0.503675
6872	TAF1	0.195959	0.294645	0.028	0.202121	0.503599
9813	KIAA0494	0.200569	0.301491	0.003	0.0588529	0.503175
4534	MTM1	0.152165	0.22873	0.1	0.386174	0.503168
57519	STARD9	0.207647	0.312121	0.0074	0.0982444	0.503138
432	ASGR1	0.174291	0.261954	0.0078	0.101455	0.502965
348995	NUP43	0.157624	0.236891	0.041	0.247888	0.502885
388341	FAM211A	0.133281	0.200298	0.0032	0.0615456	0.502827
168448	CDC14C	0.172521	0.259267	0.0618	0.306154	0.502813
55922	NKRF	0.166056	0.249538	0.0048	0.0771842	0.502736
57559	STAMBPL1	0.212174	0.318808	0.0254	0.191736	0.502578
79672	FN3KRP	0.17874	0.268567	0.0526	0.283028	0.502555
79891	ZNF671	0.183906	0.276284	0.0534	0.284942	0.50231
1392	CRH	0.526892	0.791518	0.003	0.0588529	0.502238
222643	UNC5CL	0.295562	0.44399	0.0344	0.223546	0.502191
10279	PRSS16	0.124554	0.1871	0.0002	0.00896505	0.502156
55178	RNMTL1	0.163188	0.245067	0.0164	0.154154	0.501749
85477	SCIN	0.699406	1.05023	0.023	0.181593	0.501597
55705	IPO9	0.174108	0.261387	0.0822	0.353178	0.501287
55743	CHFR	0.104527	0.156916	0.0426	0.25181	0.501208
11226	GALNT6	0.281535	0.422641	0.0192	0.166924	0.501204
64319	FBRS	0.192513	0.288971	0.0128	0.134578	0.501045
8859	STK19	0.104666	0.157094	0.0238	0.185711	0.500905
285189	PLGLA	0.381256	0.572145	0.0176	0.160197	0.500685
130132	RFTN2	0.193485	0.29031	0.025	0.190354	0.500422
29841	GRHL1	0.0889578	0.133474	0.0002	0.00896505	0.500421
123803	NTAN1	0.096864	0.145298	0.0408	0.247127	0.50002
3475	IFRD1	0.12603	0.189043	0.125	0.433793	0.499985
150967	PKI55	0.236145	0.354202	0.0506	0.277551	0.499933
57333	RCN3	0.122908	0.184297	0.0224	0.179232	0.499475
64232	MS4A5	0.253487	0.380091	0.029	0.205864	0.499452
4839	NOP2	0.168276	0.252304	0.0534	0.284942	0.499342
7073	TIAL1	0.211929	0.317704	0.035	0.225949	0.499109
6528	SLC5A5	0.315006	0.47217	0.0762	0.339725	0.498924
11173	ADAMTS7	0.15135	0.226857	0.0092	0.111247	0.498892
1397	CRIP2	0.15307	0.22941	0.0278	0.201287	0.498722
525	ATP6V1B1	0.205633	0.308138	0.0102	0.118444	0.498482
79772	MCTP1	0.568395	0.85168	0.0014	0.0375322	0.498393
2905	GRIN2C	0.294148	0.44074	0.096	0.379967	0.498361
55846	ITFG2	0.125328	0.187733	0.0458	0.262626	0.497931
54951	COMMD8	0.273767	0.410058	0.0028	0.0570085	0.497838
81543	LRRC3	0.167394	0.250728	0.1064	0.398701	0.497833
145165	ST13P4	0.150385	0.225217	0.0974	0.382512	0.497598
120892	LRRK2	0.183236	0.27436	0.0096	0.113371	0.497304
1142	CHRNB3	0.224336	0.335879	0.0512	0.279372	0.497214
5140	PDE3B	0.231024	0.345874	0.0204	0.171716	0.497134
6638	SNRPN	0.113463	0.169856	0.0648	0.313564	0.497007
7064	THOP1	0.141952	0.212499	0.0274	0.199954	0.496975
64714	PDIA2	0.270987	0.405588	0.0384	0.238303	0.496707
9320	TRIP12	0.11555	0.172872	0.1018	0.388981	0.496075
6666	SOX12	0.169959	0.25427	0.0222	0.179232	0.496069
90271	LINC00263	0.22457	0.33582	0.04	0.245582	0.495393
7350	UCP1	0.236819	0.35412	0.052	0.281435	0.49532
51231	VRK3	0.252163	0.376956	0.0316	0.214898	0.494889
50640	PNPLA8	0.203713	0.304515	0.0422	0.250779	0.494821
10152	ABI2	0.123225	0.184152	0.006	0.0879174	0.494436
223	ALDH9A1	0.143092	0.213841	0.03	0.209748	0.494431
124045	C16orf55	0.204318	0.305338	0.0348	0.22518	0.49443
1291	COL6A1	0.161609	0.241465	0.0318	0.215555	0.494131
3856	KRT8	0.147412	0.220227	0.0228	0.181129	0.493957
266722	HS6ST3	0.15588	0.232878	0.0486	0.271857	0.493952
8854	ALDH1A2	0.257286	0.384368	0.0208	0.17316	0.493932
23511	NUP188	0.158197	0.23625	0.0372	0.234522	0.493389
165257	C1QL2	0.314457	0.46952	0.001	0.0295133	0.493112
56948	SDR39U1	0.169075	0.252414	0.0436	0.254919	0.492915
1841	DTYMK	0.188439	0.281272	0.015	0.147132	0.492639
389015	SLC9A4	0.294882	0.440129	0.0092	0.111247	0.492557
5921	RASA1	0.161507	0.241037	0.0122	0.131418	0.49242
3455	IFNAR2	0.142674	0.212913	0.0096	0.113371	0.492299
79570	NKAIN1	0.177448	0.264794	0.0334	0.219616	0.492233
57048	PLSCR3	0.12798	0.190971	0.0124	0.132545	0.492193
1727	CYB5R3	0.14754	0.220112	0.024	0.1864	0.491876
866	SERPINA6	0.159278	0.237497	0.067	0.318522	0.49109
57584	ARHGAP21	0.18785	0.280089	0.0112	0.125426	0.491022
25813	SAMM50	0.129556	0.193144	0.033	0.218818	0.490815
25840	METTL7A	0.267702	0.399064	0.0054	0.083144	0.490701
441027	TMEM150C	0.25516	0.380341	0.013	0.135909	0.490599
118472	ZNF511	0.104583	0.155832	0.0036	0.0656783	0.490041
51548	SIRT6	0.164248	0.244717	0.0084	0.105633	0.489928
3575	IL7R	0.367123	0.546975	0.0226	0.180227	0.489897
56997	ADCK3	0.168679	0.251306	0.0308	0.212579	0.489845
5714	PSMD8	0.116177	0.173082	0.0202	0.171243	0.489816
677814	SNORA31	0.198664	0.29585	0.1154	0.415794	0.489198
1146	CHRNG	0.154467	0.230031	0.0994	0.384837	0.489194
7070	THY1	0.20554	0.30607	0.0466	0.26566	0.489101
60598	KCNK15	0.129257	0.192471	0.0346	0.224409	0.489057
9671	WSCD2	0.213668	0.318163	0.0326	0.217965	0.489052
10981	RAB32	0.211312	0.314637	0.0314	0.214149	0.488969
886	CCKAR	0.264859	0.394365	0.0404	0.246134	0.488964
2863	GPR39	0.134007	0.199512	0.0766	0.340071	0.488815
57466	SCAF4	0.202684	0.301723	0.036	0.230265	0.488636
7316	UBC	0.100636	0.149769	0.0188	0.166308	0.488219
29070	CCDC113	0.191056	0.284317	0.0346	0.224409	0.488135
4087	SMAD2	0.131693	0.195972	0.0046	0.0751273	0.488093
80757	TMEM121	0.197611	0.294049	0.0102	0.118444	0.488025
23107	MRPS27	0.127427	0.189563	0.0426	0.25181	0.487621
551	AVP	0.129133	0.192096	0.0162	0.153312	0.487575
84226	C2orf16	0.24411	0.362951	0.0254	0.191736	0.486837
728743	LOC728743	0.198331	0.294831	0.037	0.234235	0.486564
57127	RHBG	0.139143	0.206838	0.0474	0.268203	0.486511
4215	MAP3K3	0.0673807	0.100162	0.032	0.215945	0.486507
159371	SLC35G1	0.238826	0.35499	0.0292	0.206844	0.486397
4741	NEFM	0.21488	0.31939	0.0126	0.13374	0.486364
85027	C5orf62	0.280094	0.416299	0.0204	0.171716	0.486282
863	CBFA2T3	0.0935911	0.139095	0.05	0.275802	0.486196
11257	TP53TG1	0.1919	0.28515	0.0196	0.168382	0.485933
55857	PLK1S1	0.189108	0.280989	0.019	0.16675	0.485865
619571	SNORD96A	0.325852	0.484165	0.0212	0.174659	0.485846
100506870	LOC100506870	0.332051	0.493363	0.0404	0.246134	0.485805
120586	OR8I2	0.314322	0.46702	0.071	0.326871	0.485798
149018	LELP1	0.27492	0.408464	0.0276	0.200623	0.485753
8243	SMC1A	0.145609	0.216309	0.1966	0.528759	0.485545
6207	RPS13	0.0974409	0.144742	0.0416	0.249077	0.485438
10600	USP16	0.164713	0.244647	0.062	0.306598	0.485297
339175	METTL2A	0.0961476	0.142798	0.0688	0.32244	0.485195
10418	SPON1	0.251316	0.373215	0.0486	0.271857	0.485045
64757		0.21363	0.317161	0.0824	0.353673	0.484627
79576	NKAP	0.176096	0.261428	0.054	0.286312	0.484576
3189	HNRNPH3	0.130927	0.194368	0.0032	0.0615456	0.48455
253738	EBF3	0.153184	0.227403	0.0794	0.34705	0.484509
5825	ABCD3	0.134056	0.198969	0.0164	0.154154	0.484218
26751	SH3YL1	0.173237	0.257099	0.0128	0.134578	0.484089
28951	TRIB2	0.243265	0.361014	0.0056	0.0847368	0.484036
4800	NFYA	0.0865178	0.12839	0.0038	0.0676254	0.483969
4946	OAZ1	0.108133	0.160466	0.07	0.324507	0.483964
4864	NPC1	0.120925	0.179448	0.0428	0.252544	0.483963
83656	C8orf12	0.165301	0.245291	0.0672	0.318522	0.483911
22888	UBOX5	0.0949613	0.140901	0.0726	0.330857	0.483777
60484	HAPLN2	0.110608	0.164117	0.069	0.322742	0.483773
343641	TGM6	0.169118	0.250914	0.0642	0.311837	0.483656
134637	ADAT2	0.244967	0.363435	0.0308	0.212579	0.483609
2322	FLT3	0.419174	0.621886	0.0088	0.108777	0.483599
5081	PAX7	0.111503	0.165426	0.0834	0.356497	0.483599
1044	CDX1	0.15788	0.234214	0.0372	0.234522	0.483497
83657	DYNLRB2	0.126943	0.188301	0.1	0.386174	0.483359
115207	KCTD12	0.433801	0.64345	0.018	0.162068	0.483284
9567	GTPBP1	0.138157	0.204911	0.0532	0.284787	0.483175
80760	ITIH5	0.271925	0.403294	0.0526	0.283028	0.483105
10297	APC2	0.181232	0.268761	0.0578	0.295649	0.482966
963	CD53	0.389705	0.577905	0.009	0.110026	0.482928
51389	RWDD1	0.120659	0.178921	0.0592	0.299775	0.482868
55315	SLC29A3	0.211507	0.313635	0.0112	0.125426	0.482855
51102	MECR	0.142066	0.210645	0.0982	0.384026	0.482726
1350	COX7C	0.133818	0.198411	0.009	0.110026	0.482696
8396	PIP4K2B	0.103632	0.153639	0.017	0.157224	0.482541
160	AP2A1	0.142171	0.210768	0.0064	0.0909029	0.482498
4345	CD200	0.125859	0.186561	0.0796	0.347287	0.482306
11215	AKAP11	0.124259	0.184171	0.0248	0.18935	0.482157
65251	ZNF649	0.259738	0.384882	0.0454	0.261411	0.481807
29103	DNAJC15	0.219065	0.324516	0.0142	0.142384	0.481366
3622	ING2	0.195629	0.289772	0.047	0.266755	0.481231
11260	XPOT	0.123766	0.183325	0.0404	0.246134	0.481222
84769	MPV17L2	0.11718	0.173536	0.062	0.306598	0.480943
10761	PLAC1	0.153993	0.228027	0.0512	0.279372	0.480763
219541	MED19	0.186681	0.276428	0.0306	0.212341	0.480753
126433	FBXO27	0.203933	0.301903	0.061	0.30427	0.480404
23283	CSTF2T	0.200573	0.29681	0.0086	0.106859	0.479809
112611	RWDD2A	0.14633	0.21646	0.0994	0.384837	0.479261
4720	NDUFS2	0.12676	0.187509	0.0384	0.238303	0.479239
7542	ZFPL1	0.176375	0.26088	0.0218	0.177411	0.47912
83759	RBM4B	0.213701	0.316089	0.0076	0.100024	0.47912
474	ATOH1	0.227805	0.336945	0.0996	0.385254	0.479096
56204	FAM214A	0.203686	0.301136	0.0696	0.323913	0.478431
2543	GAGE1	0.328755	0.485962	0.0504	0.277001	0.478188
25798	BRI3	0.149096	0.220381	0.0632	0.31005	0.478118
53635	PTOV1	0.180225	0.266384	0.0034	0.0634882	0.478062
577	BAI3	0.188531	0.278652	0.0492	0.273379	0.478012
159686	CCDC147	0.279529	0.413047	0.0292	0.206844	0.477653
9013	TAF1C	0.0921366	0.136142	0.0048	0.0771842	0.477608
8880	FUBP1	0.143542	0.212076	0.041	0.247888	0.477446
23568	ARL2BP	0.119824	0.177034	0.0416	0.249077	0.477445
284615	ANKRD34A	0.159847	0.236128	0.0044	0.0732967	0.477209
157285	SGK223	0.250936	0.370682	0.0514	0.279913	0.477197
23381	SMG5	0.159233	0.235199	0.0128	0.134578	0.477078
51378	ANGPT4	0.154716	0.228527	0.036	0.230265	0.477075
8766	RAB11A	0.123228	0.18201	0.049	0.273087	0.477018
374973	ATPAF1-AS1	0.188314	0.278139	0.029	0.205864	0.477
7518	XRCC4	0.170635	0.251959	0.0626	0.30865	0.476594
6170	RPL39	0.126895	0.187346	0.021	0.173957	0.476393
124989	C17orf57	0.154914	0.228686	0.0274	0.199954	0.47621
55070	DET1	0.14279	0.210769	0.1714	0.500805	0.476081
90288	C3orf25	0.0921428	0.135992	0.1036	0.392264	0.475883
677835	SNORA56	0.342107	0.504877	0.0946	0.377021	0.475786
55611	OTUB1	0.136345	0.201213	0.0816	0.351779	0.475761
6563	SLC14A1	0.651295	0.961115	0.0096	0.113371	0.475699
245934	DEFB121	0.201903	0.297907	0.02	0.16998	0.475495
10464	PIBF1	0.347305	0.512408	0.0962	0.380217	0.475384
692063	SNORA32	0.19706	0.290731	0.0226	0.180227	0.47534
27335	EIF3K	0.133442	0.196868	0.0266	0.196176	0.475315
10765	KDM5B	0.152997	0.225717	0.055	0.289314	0.475305
79818	ZNF552	0.169085	0.249446	0.0166	0.154726	0.475268
4675	NAP1L3	0.19257	0.284085	0.0142	0.142384	0.475231
9277	WDR46	0.156518	0.230894	0.0042	0.0716837	0.475194
116092	DNTTIP1	0.167547	0.247135	0.0236	0.184669	0.475016
337975	KRTAP20-1	0.169961	0.250677	0.0894	0.367904	0.474914
7555	CNBP	0.206649	0.304757	0.0214	0.175872	0.474756
142684	RAB40A	0.28236	0.416398	0.0904	0.37001	0.474707
9725	TMEM63A	0.197464	0.291144	0.0104	0.119518	0.474416
114659	LRRC37B	0.211676	0.312084	0.0174	0.159333	0.474345
6746	SSR2	0.178074	0.262472	0.0934	0.374836	0.473952
200879	LIPH	0.272405	0.401478	0.1104	0.405936	0.473826
2252	FGF7	0.338901	0.499479	0.0082	0.104698	0.473819
922	CD5L	0.156284	0.230289	0.0336	0.220236	0.47353
2335	FN1	0.201292	0.296607	0.0356	0.228583	0.473517
788	SLC25A20	0.131508	0.193774	0.0118	0.128773	0.473479
221656	KDM1B	0.222412	0.327651	0.0028	0.0570085	0.473173
55937	APOM	0.18902	0.278434	0.024	0.1864	0.473044
4670	HNRNPM	0.116613	0.171743	0.0056	0.0847368	0.47276
55068	ENOX1	0.21774	0.320662	0.0024	0.0517723	0.472682
22980	TCF25	0.152796	0.224983	0.0356	0.228583	0.472439
116085	SLC22A12	0.109448	0.161149	0.0032	0.0615456	0.472381
55124	PIWIL2	0.344462	0.507103	0.0546	0.287936	0.47216
10576	CCT2	0.172374	0.25371	0.0526	0.283028	0.471859
80128	TRIM46	0.138511	0.203826	0.0468	0.266254	0.471557
5774	PTPN3	0.184766	0.271839	0.0754	0.337619	0.471265
64094	SMOC2	0.266218	0.391621	0.089	0.367352	0.471056
8653	DDX3Y	0.732734	1.07785	0.098	0.383783	0.470999
5172	SLC26A4	0.218342	0.321178	0.0122	0.131418	0.470985
63925	ZNF335	0.139307	0.204863	0.0518	0.280808	0.470579
388387	LOC388387	0.111433	0.163821	0.0642	0.311837	0.470136
388011	C14orf64	0.24747	0.3638	0	0	0.470078
83889	WDR87	0.171093	0.251515	0.029	0.205864	0.470052
10730	YME1L1	0.135291	0.198873	0.0216	0.176906	0.469971
3020	H3F3A	0.125177	0.184	0.0158	0.151069	0.469914
51166	AADAT	0.161896	0.237972	0.036	0.230265	0.469906
203245	NAIF1	0.136085	0.200032	0.0286	0.204592	0.469902
7126	TNFAIP1	0.16866	0.247913	0.0638	0.31089	0.469895
1062	CENPE	0.220187	0.323624	0.0554	0.290593	0.469767
22996	TTC39A	0.221012	0.32475	0.0684	0.321378	0.469375
23639	LRRC6	0.15786	0.231936	0.0488	0.272154	0.469256
5971	RELB	0.137356	0.201793	0.0158	0.151069	0.469124
2770	GNAI1	0.180951	0.265834	0.0414	0.248863	0.469092
4253	CTAGE5	0.386323	0.567445	0.0072	0.0971359	0.468834
9092	SART1	0.197436	0.289998	0.0416	0.249077	0.468818
100292680	LOC100292680	0.175194	0.257325	0.1982	0.530751	0.468798
7552	ZNF711	0.214797	0.315438	0.0222	0.179232	0.468544
26247	OR2L1P	0.270278	0.396898	0.0452	0.26089	0.468481
64180	DPEP3	0.152247	0.223571	0.0248	0.18935	0.468475
390327	OR6C70	0.194534	0.285641	0.037	0.234235	0.468335
7431	VIM	0.267758	0.393141	0.028	0.202121	0.468274
79730	NSUN7	0.360547	0.529353	0.078	0.343633	0.468194
9311	ACCN3	0.142226	0.208811	0.0408	0.247127	0.468168
56521	DNAJC12	0.136589	0.200525	0.0114	0.126561	0.468096
100287896	LOC100287896	0.137043	0.201168	0.0126	0.13374	0.467916
441179	LOC441179	0.190359	0.27938	0.0206	0.172616	0.467649
142891	SAMD8	0.112121	0.164544	0.029	0.205864	0.467561
7485	WRB	0.177419	0.260328	0.0602	0.30236	0.467305
6594	SMARCA1	0.125477	0.184113	0.0174	0.159333	0.467303
174	AFP	0.261621	0.383851	0.0224	0.179232	0.467205
83604	TMEM47	0.20708	0.303787	0.0362	0.231189	0.467008
3728	JUP	0.100455	0.147365	0.0492	0.273379	0.466975
1045	CDX2	0.191039	0.280233	0.0126	0.13374	0.466888
26747	NUFIP1	0.119531	0.175296	0.1274	0.437298	0.466526
55300	PI4K2B	0.21575	0.316396	0.05	0.275802	0.466492
55222	LRRC20	0.126683	0.185767	0.011	0.12402	0.466393
55179	FAIM	0.22116	0.324293	0.0202	0.171243	0.466327
23064	SETX	0.348077	0.510287	0.0096	0.113371	0.466016
3068	HDGF	0.151487	0.222078	0.0012	0.0336303	0.465987
115196	ZNF554	0.151879	0.222631	0.0064	0.0909029	0.465846
388389	CCDC103	0.254707	0.37332	0.0084	0.105633	0.465687
129080	EMID1	0.225867	0.331021	0.0092	0.111247	0.465557
84148	KAT8	0.160013	0.234481	0.0066	0.092561	0.465389
283130	SLC25A45	0.11615	0.17018	0.138	0.454863	0.465174
6860	SYT4	0.398508	0.583874	0.0908	0.370284	0.465149
94097	SFXN5	0.201196	0.294732	0.0832	0.356281	0.464901
23133	PHF8	0.11907	0.174391	0.0488	0.272154	0.464605
51289	RXFP3	0.164699	0.241202	0.0018	0.0435	0.464508
5528	PPP2R5D	0.152258	0.222961	0.0372	0.234522	0.464362
10776	ARPP19	0.127321	0.186414	0.0222	0.179232	0.464125
2778	GNAS	0.120919	0.177032	0.0592	0.299775	0.464056
8731	RNMT	0.150626	0.22051	0.0488	0.272154	0.463955
192670	EIF2C4	0.162762	0.238265	0.111	0.407065	0.463886
7706	TRIM25	0.170078	0.248973	0.0394	0.242702	0.463875
946	SIGLEC6	0.221081	0.323597	0.0558	0.29159	0.463704
84900	RNFT2	0.0984938	0.144159	0.0312	0.213659	0.463632
1490	CTGF	0.485504	0.71052	0.0272	0.199542	0.463469
56123	PCDHB13	0.176704	0.258556	0.09	0.369097	0.463212
3320	HSP90AA1	0.126188	0.184608	0.0018	0.0435	0.462961
11044	PAPD7	0.197718	0.289237	0.0044	0.0732967	0.46288
6182	MRPL12	0.160501	0.234713	0.0406	0.246722	0.462379
84881	RPUSD4	0.206851	0.302437	0.0212	0.174659	0.4621
54619	CCNJ	0.250891	0.366811	0.0154	0.149126	0.462031
284804	LOC284804	0.167208	0.244408	0.0772	0.341733	0.461702
3184	HNRNPD	0.111777	0.163373	0.1422	0.460246	0.461595
83743	GRWD1	0.153598	0.224494	0.1452	0.464813	0.461568
23091	ZC3H13	0.151085	0.220782	0.0108	0.122095	0.46131
23418	CRB1	0.19715	0.288065	0.0424	0.25143	0.461147
10099	TSPAN3	0.119666	0.17482	0.0282	0.202862	0.460907
90338	ZNF160	0.139404	0.203652	0.0768	0.340777	0.460868
122525	C14orf28	0.194634	0.284317	0.03	0.209748	0.460779
6583	SLC22A4	0.211041	0.308281	0.1348	0.448571	0.460768
11191	PTENP1	0.231613	0.338262	0.0042	0.0716837	0.460463
80067	DCAF17	0.242122	0.353598	0.0402	0.246134	0.460413
5438	POLR2I	0.205838	0.300598	0.0956	0.379284	0.460366
146712	B3GNTL1	0.159131	0.232333	0.0198	0.169142	0.460008
10533	ATG7	0.102944	0.150277	0.0538	0.285796	0.459796
286184	LOC286184	0.317723	0.463778	0.0346	0.224409	0.459693
81786	TRIM7	0.110701	0.161586	0.056	0.292086	0.459655
3636	INPPL1	0.112205	0.16376	0.0994	0.384837	0.459472
84164	ASCC2	0.108905	0.158938	0.0772	0.341733	0.459414
57619	SHROOM3	0.243803	0.355802	0.008	0.103251	0.459383
11314	CD300A	0.189031	0.275866	0.0096	0.113371	0.459368
84891	ZSCAN10	0.182612	0.266457	0.0138	0.140229	0.45914
5709	PSMD3	0.148395	0.216528	0.0322	0.216593	0.459138
2180	ACSL1	0.44869	0.65464	0.0632	0.31005	0.459002
7342	UBP1	0.150354	0.219365	0.157	0.481865	0.45899
127069	OR2T10	0.192552	0.280931	0.006	0.0879174	0.458986
7873	MANF	0.245211	0.357677	0.0086	0.106859	0.458651
51196	PLCE1	0.135221	0.1972	0.1172	0.41947	0.45835
7855	FZD5	0.242733	0.353974	0.0156	0.150364	0.458288
221400	TDRD6	0.3005	0.438172	0.021	0.173957	0.458144
9730	VPRBP	0.18199	0.265336	0.0312	0.213659	0.457969
23410	SIRT3	0.130859	0.190771	0.028	0.202121	0.45784
200150	PLD5	0.19456	0.283631	0.0614	0.305352	0.457802
7290	HIRA	0.144459	0.210592	0.033	0.218818	0.457794
89792	GAL3ST3	0.152984	0.22301	0.0906	0.370011	0.457731
3735	KARS	0.108179	0.157688	0.029	0.205864	0.457662
9416	DDX23	0.104843	0.152784	0.0532	0.284787	0.457269
60491	NIF3L1	0.136043	0.198229	0.0432	0.253737	0.457102
166379	BBS12	0.352039	0.512953	0.1394	0.456141	0.457091
51295	ECSIT	0.127951	0.186433	0.0454	0.261411	0.457065
190	NR0B1	0.313295	0.456279	0.0274	0.199954	0.45639
27189	IL17C	0.150394	0.218988	0.1394	0.456141	0.456099
9811	CTIF	0.0600628	0.087457	0.1906	0.521795	0.456093
158062	LCN6	0.147769	0.215085	0.0304	0.211658	0.455548
125061	AFMID	0.118681	0.172712	0.0082	0.104698	0.455265
9473	C1orf38	0.222239	0.323391	0.0638	0.31089	0.455151
57109	REXO4	0.195907	0.285036	0.0792	0.34663	0.454958
150864	FAM117B	0.198838	0.289216	0.0198	0.169142	0.45453
7299	TYR	0.155171	0.225688	0.1132	0.411154	0.454447
55972	SLC25A40	0.228872	0.332833	0.0402	0.246134	0.454233
79132	DHX58	0.146386	0.212818	0.0312	0.213659	0.453822
4947	OAZ2	0.135865	0.197488	0.0248	0.18935	0.453561
202299	C5orf27	0.288061	0.418706	0.034	0.222159	0.453534
144348	ZNF664	0.225416	0.327641	0.0706	0.325568	0.453497
219479	OR5R1	0.238251	0.346278	0.0476	0.268879	0.453417
83643	CCDC3	0.242013	0.35163	0.035	0.225949	0.452943
7768	ZNF225	0.236867	0.344149	0.0032	0.0615456	0.452921
26157	GIMAP2	0.294355	0.427654	0	0	0.45285
55218	EXD2	0.178812	0.259778	0.0316	0.214898	0.452796
2624	GATA2	0.153338	0.222768	0.043	0.253187	0.452794
220906	LOC220906	0.0830208	0.120607	0.0148	0.145943	0.452737
9910	RABGAP1L	0.26633	0.386901	0.0298	0.209051	0.452715
54438	GFOD1	0.119925	0.174179	0.1676	0.496702	0.452399
150384	CN5H6.4	0.195697	0.284225	0.0556	0.291184	0.452376
6813	STXBP2	0.156164	0.226782	0.1212	0.427094	0.452202
55345	C4orf21	0.282778	0.410646	0.0694	0.323705	0.452184
1337	COX6A1	0.0906964	0.13168	0.0404	0.246134	0.45188
1441	CSF3R	0.202761	0.294301	0.0688	0.32244	0.451467
80206	FHOD3	0.140732	0.204266	0.0448	0.259389	0.451461
5347	PLK1	0.0944355	0.137055	0.179	0.508401	0.451312
64747	MFSD1	0.149851	0.217461	0.1268	0.436948	0.45118
10638	SPHAR	0.171165	0.248347	0.0024	0.0517723	0.450925
126306	JSRP1	0.203142	0.294716	0.0176	0.160197	0.45079
55069	C7orf42	0.125655	0.182259	0.0158	0.151069	0.450467
26872	STEAP1	0.279736	0.40566	0.1128	0.410059	0.450153
255349	TMEM211	0.202969	0.294332	0.0356	0.228583	0.450134
4041	LRP5	0.147827	0.214271	0.0116	0.127508	0.449468
3727	JUND	0.236173	0.342303	0.0126	0.13374	0.449371
84939	MUM1	0.184301	0.267109	0.103	0.391414	0.44931
135886	WBSCR28	0.149257	0.216283	0.0288	0.205319	0.449062
5646	PRSS3	0.179625	0.260278	0.0786	0.345091	0.449008
80152	CENPT	0.19	0.275255	0.017	0.157224	0.448708
6452	SH3BP2	0.121545	0.176079	0.0328	0.218601	0.44867
152273	FGD5	0.182307	0.264077	0.0576	0.295169	0.448535
5733	PTGER3	0.241994	0.350517	0.0404	0.246134	0.448452
56109	PCDHGA6	0.18596	0.269309	0.0422	0.250779	0.448209
11102	RPP14	0.131964	0.19111	0.0542	0.286825	0.448199
22986	SORCS3	0.184087	0.266593	0.1152	0.415522	0.448187
10739	RFPL2	0.503813	0.729582	0.0314	0.214149	0.448121
57467	HHATL	0.381025	0.551751	0.0336	0.220236	0.448067
9920	KBTBD11	0.166908	0.241671	0.1068	0.399841	0.447928
7314	UBB	0.141398	0.204704	0.0744	0.33467	0.447713
54848	ARHGEF38	0.210636	0.304875	0.0742	0.334221	0.4474
55225	RAVER2	0.280514	0.405995	0.0306	0.212341	0.447324
8161	COIL	0.140153	0.202843	0.1072	0.400439	0.447296
55032	SLC35A5	0.139706	0.202188	0.0288	0.205319	0.447243
22977	AKR7A3	0.163167	0.236129	0.0088	0.108777	0.447163
3607	FOXK2	0.140856	0.203827	0.054	0.286312	0.447059
677797	SNORA7B	0.189116	0.273647	0.0698	0.324301	0.446982
59341	TRPV4	0.113439	0.164142	0.033	0.218818	0.446968
23559	WBP1	0.162084	0.234525	0.029	0.205864	0.44693
245806	VGLL2	0.233125	0.33731	0.0604	0.302908	0.446908
54885	TBC1D8B	0.201507	0.29156	0.0534	0.284942	0.446901
54715	RBFOX1	0.0944403	0.136644	0.042	0.250304	0.446877
57134	MAN1C1	0.190796	0.276055	0.0564	0.29289	0.446858
100506627	DCDC5	0.195743	0.28319	0.0566	0.293289	0.446743
25804	LSM4	0.148167	0.214353	0.0078	0.101455	0.446703
116511	MAS1L	0.209812	0.303535	0.006	0.0879174	0.446702
7561	ZNF14	0.145109	0.209928	0.0378	0.236694	0.446696
55840	EAF2	0.179761	0.26004	0.0696	0.323913	0.446586
1584	CYP11B1	0.12149	0.175723	0.3344	0.658493	0.446391
23603	CORO1C	0.199847	0.289022	0.0446	0.25841	0.446218
79993	ELOVL7	0.401913	0.581248	0.0736	0.332777	0.446205
55863	TMEM126B	0.111916	0.161843	0.1652	0.492881	0.446111
2570	GABRR2	0.222683	0.322019	0.0746	0.335388	0.44609
10480	EIF3M	0.137905	0.199417	0.0576	0.295169	0.446052
51809	GALNT7	0.168855	0.244172	0.0144	0.143527	0.446044
6911	TBX6	0.130831	0.189142	0.0442	0.256986	0.445698
9480	ONECUT2	0.290869	0.420506	0.0414	0.248863	0.445685
5297	PI4KA	0.0641383	0.092717	0.1048	0.394924	0.445581
81127	OR4K15	0.134491	0.194397	0.0588	0.298566	0.445428
27238	GPKOW	0.112867	0.163136	0.0118	0.128773	0.44538
10926	DBF4	0.218548	0.315874	0.0234	0.183794	0.445333
163782	KANK4	0.342458	0.494951	0.046	0.263501	0.44529
5074	PAWR	0.214615	0.310176	0.032	0.215945	0.445265
23614	PPY2	0.0873809	0.12628	0.0856	0.361362	0.445166
2801	GOLGA2	0.150892	0.218052	0.0724	0.330216	0.445086
5033	P4HA1	0.20042	0.289617	0.047	0.266755	0.445049
3843	IPO5	0.11318	0.163541	0.061	0.30427	0.444954
55631	LRRC40	0.204121	0.294945	0.0108	0.122095	0.444949
81572	PDRG1	0.181052	0.261533	0.0102	0.118444	0.444514
3987	LIMS1	0.279677	0.403977	0.1758	0.505251	0.44444
10592	SMC2	0.288416	0.416568	0.035	0.225949	0.444333
84823	LMNB2	0.152499	0.220237	0.0264	0.19548	0.44419
706	TSPO	0.132463	0.191289	0.0494	0.274034	0.4441
8615	USO1	0.151687	0.219033	0.0568	0.293414	0.443976
254295	PHYHD1	0.218425	0.315382	0.0894	0.367904	0.443895
51634	RBMX2	0.137467	0.198461	0.0772	0.341733	0.443701
6335	SCN9A	0.224897	0.324661	0.1318	0.444262	0.443594
90589	ZNF625	0.237425	0.342733	0.1352	0.449633	0.443541
51375	SNX7	0.128629	0.185677	0.0736	0.332777	0.443509
23516	SLC39A14	0.165196	0.238458	0.0256	0.192897	0.443487
3481	IGF2	0.258359	0.372907	0.184	0.513249	0.443366
3790	KCNS3	0.229535	0.331284	0.0374	0.23516	0.443283
286362	OR13C9	0.222669	0.321349	0.0866	0.362737	0.443166
390201	OR10V1	0.174526	0.251864	0.0294	0.207643	0.443129
2273	FHL1	0.124884	0.180219	0.0872	0.363788	0.443089
201266	SLC39A11	0.191195	0.275876	0.0274	0.199954	0.442905
10983	CCNI	0.204938	0.295695	0.2476	0.584475	0.442849
361	AQP4	0.336417	0.485335	0.0366	0.232586	0.442661
253039	LOC253039	0.354361	0.511139	0.0632	0.31005	0.442424
55329	MNS1	0.21587	0.311365	0.0812	0.350689	0.442371
8204	NRIP1	0.209361	0.301968	0.0188	0.166308	0.442328
4091	SMAD6	0.114923	0.16575	0.0888	0.367156	0.442271
201931	TMEM192	0.288684	0.416344	0.063	0.309524	0.442213
131474	CHCHD4	0.138836	0.200183	0.061	0.30427	0.441868
51646	YPEL5	0.128936	0.185904	0.0172	0.158196	0.441832
6294	SAFB	0.126315	0.182124	0.1198	0.424674	0.441825
9263	STK17A	0.210756	0.303872	0.0634	0.310483	0.441818
402573	C7orf61	0.199025	0.286953	0.0704	0.325366	0.441796
10903	MTMR11	0.0834186	0.120258	0.1242	0.432186	0.441626
1141	CHRNB2	0.0884069	0.127444	0.0542	0.286825	0.441556
27153	ZNF777	0.133319	0.192172	0.0314	0.214149	0.441452
10391	CORO2B	0.189327	0.272881	0.0408	0.247127	0.441322
246243	RNASEH1	0.167347	0.241159	0.0232	0.182653	0.441073
24139	EML2	0.179546	0.25873	0.1356	0.450514	0.441024
5539	PPY	0.150539	0.216925	0.0724	0.330216	0.440992
84519	ACRBP	0.144611	0.208329	0.0618	0.306154	0.440617
3831	KLC1	0.12981	0.186976	0.089	0.367352	0.440382
26226	FBXW4P1	0.164643	0.237121	0.0372	0.234522	0.440216
10282	BET1	0.178672	0.257273	0.0942	0.376146	0.439923
79899	PRR5L	0.30145	0.434042	0.0468	0.266254	0.439847
641518	LOC641518	0.14063	0.202441	0.0054	0.083144	0.439533
79718	TBL1XR1	0.228734	0.329265	0.0366	0.232586	0.43951
55116	TMEM39B	0.185767	0.267368	0.0176	0.160197	0.439262
64799	IQCH	0.239042	0.344026	0.0796	0.347287	0.439186
23630	KCNE1L	0.275858	0.396967	0.0138	0.140229	0.43903
84171	LOXL4	0.35522	0.511171	0.1232	0.430774	0.439029
9818	NUPL1	0.186714	0.268668	0.023	0.181593	0.438926
387694	SH2D4B	0.197013	0.283475	0.0504	0.277001	0.438865
64411	ARAP3	0.182923	0.263193	0.074	0.333771	0.438821
84793	MGC12982	0.242732	0.349225	0.0612	0.304721	0.438729
51161	C3orf18	0.157521	0.226622	0.094	0.375707	0.438683
90780	PYGO2	0.163842	0.235711	0.0492	0.273379	0.438643
51458	RHCG	0.192428	0.276834	0.0244	0.187584	0.438637
7827	NPHS2	0.421024	0.60559	0.1384	0.455191	0.438375
124056	NOXO1	0.144321	0.207576	0.1336	0.446986	0.438295
29982	NRBF2	0.148569	0.213686	0.0124	0.132545	0.438293
387264	KRTAP5-1	0.146893	0.21127	0.0348	0.22518	0.438255
64969	MRPS5	0.110759	0.159292	0.0586	0.297822	0.438182
5001	ORC5	0.108154	0.15553	0.0466	0.26566	0.438047
23549	DNPEP	0.212361	0.30537	0.1272	0.437152	0.437977
51398	WDR83OS	0.153386	0.220536	0.0442	0.256986	0.437785
84448	ABLIM2	0.0637169	0.0916076	0.0728	0.331406	0.43773
6618	SNAPC2	0.141863	0.203938	0.1104	0.405936	0.437572
440225	NF1P2	0.260247	0.374097	0.0134	0.138185	0.437466
10763	NES	0.173912	0.249976	0.0926	0.373243	0.437374
91807	MYLK3	0.312422	0.448998	0.0188	0.166308	0.437152
27350	APOBEC3C	0.325604	0.467924	0.0212	0.174659	0.437098
92840	REEP6	0.114786	0.164947	0.0866	0.362737	0.436988
200933	FBXO45	0.0884818	0.127144	0.0364	0.231934	0.436949
10261	IGSF6	0.449859	0.646348	0.0806	0.349728	0.436779
130888	FBXO36	0.21497	0.308838	0.0052	0.0814178	0.436654
5224	PGAM2	0.238417	0.342505	0.0636	0.310641	0.436583
6144	RPL21	0.140299	0.201532	0.063	0.309524	0.436439
64405	CDH22	0.197124	0.28306	0.0834	0.356497	0.435947
286077	FAM83H	0.168609	0.242095	0.072	0.329383	0.435841
945	CD33	0.227476	0.326564	0.0678	0.319911	0.435594
1345	COX6C	0.0935976	0.134346	0.0684	0.321378	0.435357
6504	SLAMF1	0.200385	0.287596	0.0056	0.0847368	0.435215
266629	SEC14L3	0.117313	0.168329	0.1286	0.439698	0.434868
6714	SRC	0.188127	0.269921	0.0154	0.149126	0.434779
6637	SNRPG	0.125391	0.179895	0.1012	0.388469	0.434677
9322	TRIP10	0.189193	0.271404	0.0108	0.122095	0.434535
9334	B4GALT5	0.161218	0.23127	0.0506	0.277551	0.434518
6389	SDHA	0.167958	0.240931	0.0538	0.285796	0.434473
79940	LINC00472	0.196508	0.281816	0.0552	0.289817	0.434119
4258	MGST2	0.173435	0.24872	0.0604	0.302908	0.434084
222236	NAPEPLD	0.183633	0.263328	0.0558	0.29159	0.433988
284900	TTC28-AS1	0.180862	0.259317	0.0178	0.16105	0.433782
257160	RNF214	0.141933	0.203495	0.0106	0.120652	0.433743
51083	GAL	0.400887	0.574718	0.1024	0.39029	0.433617
4067	LYN	0.292519	0.419343	0.0228	0.181129	0.433555
6615	SNAI1	0.266911	0.382623	0.0574	0.294869	0.433526
8550	MAPKAPK5	0.193979	0.278052	0.0452	0.26089	0.43341
55777	MBD5	0.172206	0.246794	0.1072	0.400439	0.433134
10989	IMMT	0.118833	0.170278	0.1712	0.500572	0.432919
24148	PRPF6	0.149503	0.21422	0.1014	0.388611	0.432876
5252	PHF1	0.0936026	0.134119	0.0112	0.125426	0.432857
125058	TBC1D16	0.248102	0.355421	0.0542	0.286825	0.43256
100526794	NT5C1B-RDH14	0.155009	0.222031	0.0208	0.17316	0.432369
342850	ANKRD62	0.343892	0.492574	0.058	0.296399	0.432353
203076	C8orf74	0.111936	0.160311	0.0612	0.304721	0.43217
55291	PPP6R3	0.189692	0.271664	0.0766	0.340071	0.432129
23510	KCTD2	0.172116	0.246491	0.0408	0.247127	0.432126
9425	CDYL	0.124301	0.178009	0.0774	0.341893	0.432082
4135	MAP6	0.17533	0.251066	0.0608	0.303818	0.431962
152206	CCDC13	0.154719	0.221534	0.0914	0.371096	0.431848
84261	FBXW9	0.17123	0.245147	0.0022	0.0491756	0.431685
9564	BCAR1	0.170794	0.244509	0.1544	0.47962	0.431604
27286	SRPX2	0.189439	0.271197	0.0938	0.375707	0.431577
54059	YBEY	0.278883	0.399216	0.1904	0.521762	0.43148
7514	XPO1	0.17883	0.255968	0.0838	0.357474	0.431344
284546	C1orf185	0.142527	0.203972	0.072	0.329383	0.431105
23279	NUP160	0.139678	0.199872	0.0812	0.350689	0.430941
390036	OR52K1	0.135415	0.193742	0.195	0.526408	0.430726
257218	SHPRH	0.195831	0.280092	0.019	0.16675	0.430274
1106	CHD2	0.105112	0.150334	0.0218	0.177411	0.430228
84224	NBPF3	0.192903	0.275887	0.0584	0.297259	0.430189
5913	RAPSN	0.115578	0.165298	0.0628	0.309179	0.430185
338707	B4GALNT4	0.177677	0.254102	0.034	0.222159	0.430136
80006	C5orf44	0.156327	0.223525	0.0192	0.166924	0.429853
25775	C22orf24	0.166078	0.237438	0.2244	0.559072	0.429678
4056	LTC4S	0.253925	0.362996	0.0488	0.272154	0.429543
3875	KRT18	0.130016	0.185861	0.0628	0.309179	0.429527
9107	MTMR6	0.183407	0.262172	0.0866	0.362737	0.429452
51669	TMEM66	0.153572	0.219491	0.0492	0.273379	0.429241
168002	DACT2	0.392783	0.561334	0.0748	0.335925	0.429121
9550	ATP6V1G1	0.20804	0.297224	0.0414	0.248863	0.428684
7728	ZNF175	0.224201	0.320305	0.1798	0.509113	0.428651
81501	TM7SF4	0.186036	0.265767	0.0918	0.371455	0.428578
6949	TCOF1	0.159856	0.228338	0.0138	0.140229	0.428397
221393	GPR115	0.213585	0.305073	0.0666	0.317664	0.428344
81622	UNC93B1	0.133184	0.190224	0.1284	0.439555	0.428276
284098	PIGW	0.238075	0.34002	0.093	0.374222	0.428204
23385	NCSTN	0.183425	0.261894	0.0404	0.246134	0.427801
92999	ZBTB47	0.175247	0.250202	0.0516	0.280362	0.427715
2904	GRIN2B	0.201791	0.288091	0.0864	0.362354	0.427668
80207	OPA3	0.182139	0.260023	0.0164	0.154154	0.427613
219347	LOC219347	0.165717	0.236567	0.0066	0.092561	0.427539
23463	ICMT	0.117818	0.168187	0.1074	0.400468	0.427507
481	ATP1B1	0.0989594	0.141248	0.0332	0.218818	0.427337
8175	SF3A2	0.240062	0.342631	0.0128	0.134578	0.42726
441502	RPS26P11	0.280413	0.400198	0.0656	0.315421	0.427171
5562	PRKAA1	0.130931	0.186851	0.123	0.430435	0.427097
6132	RPL8	0.146256	0.208708	0.0536	0.285279	0.427002
51214	IGF2-AS	0.274613	0.391848	0.0034	0.0634882	0.42691
79974	C7orf58	0.310943	0.443685	0.0564	0.29289	0.426903
23051	ZHX3	0.134318	0.191657	0.0402	0.246134	0.426896
3579	CXCR2	0.0858973	0.12256	0.0468	0.266254	0.426826
100294406	LOC100294406	0.6189	0.882925	0.1242	0.432186	0.426603
339803	LOC339803	0.385595	0.550071	0.0602	0.30236	0.426552
29766	TMOD3	0.193763	0.276332	0.0568	0.293414	0.426132
4010	LMX1B	0.180108	0.256857	0.0568	0.293414	0.426125
56164	STK31	0.244033	0.347992	0.1618	0.489125	0.426007
4695	NDUFA2	0.155144	0.221226	0.1716	0.500951	0.425941
1442	CSH1	0.249536	0.355811	0.0138	0.140229	0.42589
132158	GLYCTK	0.147886	0.210853	0.052	0.281435	0.425777
11094	C9orf7	0.176505	0.251622	0.0192	0.166924	0.42558
390882	OR7G2	0.147867	0.210745	0.0104	0.119518	0.425234
59067	IL21	0.223446	0.318417	0.1438	0.463266	0.425032
128506	C20orf123	0.181178	0.258173	0.0434	0.254553	0.424972
89932	PAPLN	0.336406	0.479363	0.0858	0.361931	0.424953
149775	GNAS-AS1	0.166165	0.23677	0.0444	0.25761	0.42491
84306	PDCD2L	0.139929	0.199376	0.0898	0.368731	0.424836
114960	TSGA13	0.189577	0.270098	0.08	0.348485	0.424738
91544	UBXN11	0.211523	0.301328	0.0914	0.371096	0.424565
63906	GPATCH3	0.0984004	0.140176	0.1542	0.47962	0.424547
100533107	RTEL1-TNFRSF6B	0.141977	0.202211	0.0096	0.113371	0.424253
55752	Septin 11	0.122224	0.174076	0.0634	0.310483	0.424239
10513	APPBP2	0.119395	0.170043	0.047	0.266755	0.42421
2593	GAMT	0.103259	0.147047	0.0262	0.195038	0.424061
55257	C20orf20	0.211654	0.301392	0.0266	0.196176	0.423985
54583	EGLN1	0.180625	0.257189	0.0372	0.234522	0.423883
4026	LPP	0.273637	0.389611	0.0094	0.112523	0.423823
60686	C14orf93	0.287904	0.409917	0.1224	0.429508	0.423794
57410	SCYL1	0.159205	0.226666	0.0258	0.193442	0.423741
55334	SLC39A9	0.114718	0.163311	0.0588	0.298566	0.423579
10137	RBM12	0.121187	0.172503	0.0704	0.325366	0.423446
390927	ZNF793	0.156503	0.222734	0.1318	0.444262	0.423195
7277	TUBA4A	0.155925	0.22191	0.057	0.294174	0.423183
9588	PRDX6	0.169499	0.241222	0.0258	0.193442	0.423149
100130698	LOC100130698	0.195945	0.278841	0.0482	0.271166	0.423053
85365	ALG2	0.102801	0.146284	0.1606	0.487442	0.422985
311	ANXA11	0.161722	0.230081	0.058	0.296399	0.422692
3203	HOXA6	0.247822	0.35254	0.0878	0.365012	0.422553
8993	PGLYRP1	0.335556	0.477297	0.0536	0.285279	0.422406
114299	PALM2	0.154099	0.219122	0.0166	0.154726	0.421957
5641	LGMN	0.167799	0.238584	0.0672	0.318522	0.421842
10146	G3BP1	0.113305	0.161076	0.0024	0.0517723	0.421618
8310	ACOX3	0.239737	0.340806	0.069	0.322742	0.421584
8402	SLC25A11	0.152687	0.21703	0.0524	0.282682	0.421407
55239	OGFOD1	0.20938	0.297598	0.024	0.1864	0.421326
4148	MATN3	0.439824	0.625072	0.103	0.391414	0.421186
10630	PDPN	0.289489	0.411263	0.0308	0.212579	0.42065
55201	MAP1S	0.223137	0.316987	0.1554	0.480671	0.420591
22983	MAST1	0.156892	0.222873	0.0562	0.29258	0.420546
646762	LOC646762	0.3409	0.48424	0.0748	0.335925	0.420472
641	BLM	0.147907	0.210087	0.1954	0.526976	0.420401
4301	MLLT4	0.208397	0.295981	0.0258	0.193442	0.420277
57724	EPG5	0.163293	0.23191	0.0012	0.0336303	0.420203
4794	NFKBIE	0.121031	0.171875	0.0282	0.202862	0.420091
221184	CPNE2	0.159636	0.226697	0.024	0.1864	0.420082
9368	SLC9A3R1	0.209177	0.297019	0.0804	0.349679	0.419944
285973	ATG9B	0.201988	0.286734	0.019	0.16675	0.419554
348120	LOC348120	0.138303	0.196313	0.0484	0.271375	0.419434
84033	OBSCN	0.141961	0.201477	0.0976	0.383027	0.419235
9940	DLEC1	0.188843	0.267992	0.0172	0.158196	0.419125
132001	TAMM41	0.226277	0.321096	0.019	0.16675	0.41904
9040	UBE2M	0.147354	0.209083	0.0886	0.366875	0.418919
492	ATP2B3	0.171142	0.242829	0.079	0.346209	0.418875
7593	MZF1	0.131738	0.186892	0.002	0.0466434	0.418664
823	CAPN1	0.107528	0.152509	0.1018	0.388981	0.418327
51157	ZNF580	0.113064	0.16031	0.104	0.392708	0.41787
55322	C5orf22	0.140801	0.199635	0.08	0.348485	0.417857
26239	LCE2B	0.143306	0.203186	0.0812	0.350689	0.417853
79469	DLEU2L	0.215731	0.305862	0.2362	0.571894	0.417792
3172	HNF4A	0.146366	0.207498	0.0068	0.0943344	0.417667
374955	SPATA21	0.180562	0.255974	0.0758	0.338502	0.417655
22864	R3HDM2	0.188695	0.267485	0.0082	0.104698	0.417554
8817	FGF18	0.132343	0.187602	0.1742	0.503866	0.417541
115509	ZNF689	0.149469	0.21186	0.0766	0.340071	0.417412
9204	ZMYM6	0.124833	0.176938	0.1292	0.440665	0.417392
84277	DNAJC30	0.0999177	0.141618	0.3156	0.642568	0.417346
319103	SNORD8	0.276362	0.391632	0.113	0.410607	0.417096
9278	ZBTB22	0.166738	0.236262	0.0582	0.296784	0.416967
79089	TMUB2	0.116036	0.16441	0.0242	0.186563	0.416886
8404	SPARCL1	0.153775	0.217857	0.1138	0.412346	0.416722
11255	HRH3	0.178318	0.252604	0.1238	0.431695	0.416589
113246	C12orf57	0.197342	0.279524	0.0656	0.315421	0.416448
64420	SUSD1	0.251332	0.35588	0.0672	0.318522	0.415977
4821	NKX2-2	0.228207	0.323064	0.1082	0.402013	0.415663
283254	HARBI1	0.146513	0.207405	0.1146	0.414164	0.415608
4619	MYH1	0.307738	0.435573	0.0382	0.237592	0.415404
9201	DCLK1	0.157513	0.222941	0.191	0.522119	0.415381
54518	APBB1IP	0.28966	0.40991	0.0222	0.179232	0.415139
252951	TTTY20	0.150458	0.212919	0.1096	0.404332	0.415136
118471	PRAP1	0.145025	0.205226	0.0704	0.325366	0.41511
56252	YLPM1	0.13369	0.189151	0.033	0.218818	0.414847
399979	SNX19	0.183261	0.259232	0.0166	0.154726	0.414547
90668	LRRC16B	0.23834	0.337139	0.0892	0.367352	0.414532
143188	LOC143188	0.162226	0.229455	0.0602	0.30236	0.414413
414	ARSD	0.10993	0.15546	0.0276	0.200623	0.414169
388165	UBE2Q2P1	0.200791	0.283885	0.0174	0.159333	0.413832
7412	VCAM1	0.177419	0.250778	0.0608	0.303818	0.413475
196051	PPAPDC1A	0.208058	0.294064	0.0418	0.250095	0.413374
6672	SP100	0.206744	0.292199	0.1524	0.476876	0.413336
27091	CACNG5	0.124564	0.176014	0.0168	0.155893	0.413037
3336	HSPE1	0.136927	0.193472	0.1018	0.388981	0.412956
51075	TMX2	0.126928	0.179339	0.0574	0.294869	0.412914
2710	GK	0.116839	0.165044	0.2096	0.54449	0.412584
134285	TMEM171	0.185558	0.262035	0.1202	0.425007	0.412143
60437	CDH26	0.0904861	0.127764	0.1698	0.49928	0.411969
11045	UPK1A	0.162894	0.229948	0.1418	0.460112	0.411644
4641	MYO1C	0.10408	0.146912	0.0104	0.119518	0.411527
7093	TLL2	0.251403	0.354852	0.032	0.215945	0.411489
4302	MLLT6	0.148688	0.20987	0.0804	0.349679	0.411481
55100	WDR70	0.140658	0.198514	0.0354	0.228001	0.411325
5080	PAX6	0.195321	0.275659	0.0154	0.149126	0.411309
23034	SAMD4A	0.161397	0.227757	0.2242	0.559072	0.411159
5860	QDPR	0.192503	0.27164	0.0074	0.0982444	0.411093
22832	KIAA1009	0.213141	0.300746	0.0404	0.246134	0.41102
11124	FAF1	0.088755	0.125208	0.1154	0.415794	0.410711
29035	C16orf72	0.196084	0.276603	0.162	0.489641	0.410636
64841	GNPNAT1	0.171533	0.241968	0.0738	0.33341	0.410622
154449	LOC154449	0.127108	0.179295	0.1708	0.500191	0.410575
89885	FATE1	0.198917	0.280518	0.0682	0.321071	0.410222
57472	CNOT6	0.115111	0.162317	0.017	0.157224	0.410088
5710	PSMD4	0.146917	0.207152	0.0332	0.218818	0.409995
161635	CSNK1A1P1	0.195495	0.275636	0.07	0.324507	0.409936
5596	MAPK4	0.171064	0.241158	0.1448	0.464603	0.409755
8760	CDS2	0.135511	0.191028	0.0544	0.287245	0.409683
26574	AATF	0.186721	0.263202	0.0676	0.319238	0.409597
57084	SLC17A6	0.451186	0.63599	0.0038	0.0676254	0.409596
168090	C6orf118	0.286066	0.403201	0.0668	0.318254	0.409466
50940	PDE11A	0.206325	0.290793	0.0842	0.358355	0.40939
[truncated: 14,676 more rows]
