# Supplementary material for: The variability of expression of many genes and most functional pathways is observed to increase with age in brain transcriptome data
Source: bioRxiv preprint, doi:10.1101/526491, version 1 (2019-01-22)
Supplement: Supplemental Table 6 [file 526491_file08.xlsx]

## Sheet: continuous - regression
ID	Description	setSize	enrichmentScore	NES	pvalue	p.adjust	qvalues
GO:1990778	protein localization to cell periphery	245	0.397255	1.60624	9.07099e-06	0.0528113	0.0509885
GO:0072659	protein localization to plasma membrane	217	0.391632	1.57306	7.282e-05	0.211979	0.204663
GO:0071804	cellular potassium ion transport	176	0.400934	1.58967	0.000148878	0.216692	0.209213
GO:0071805	potassium ion transmembrane transport	176	0.400934	1.58967	0.000148878	0.216692	0.209213
GO:0006813	potassium ion transport	202	0.387129	1.54867	0.000214903	0.236916	0.228738
GO:0015672	monovalent inorganic cation transport	440	0.337696	1.39662	0.000244159	0.236916	0.228738
GO:0072657	protein localization to membrane	497	0.330023	1.36965	0.000295097	0.245437	0.236965
GO:0051962	positive regulation of nervous system development	443	0.332638	1.37598	0.000460296	0.29782	0.287541
GO:0034762	regulation of transmembrane transport	463	0.329613	1.36525	0.000556264	0.29782	0.287541
GO:0048820	hair follicle maturation	12	0.737571	1.86688	0.000607684	0.29782	0.287541
GO:0030099	myeloid cell differentiation	341	0.342132	1.40311	0.000761766	0.29782	0.287541
GO:0050890	cognition	244	0.361374	1.46083	0.000785225	0.29782	0.287541
GO:0007265	Ras protein signal transduction	405	0.331853	1.36901	0.000917928	0.29782	0.287541
GO:0002573	myeloid leukocyte differentiation	162	0.388103	1.52987	0.000935699	0.29782	0.287541
GO:1902932	positive regulation of alcohol biosynthetic process	16	-0.623782	-2.10113	0.000937397	0.29782	0.287541
GO:0006644	phospholipid metabolic process	402	0.330735	1.36406	0.00109215	0.29782	0.287541
GO:0050821	protein stabilization	140	0.397192	1.54771	0.00109848	0.29782	0.287541
GO:0043001	Golgi to plasma membrane protein transport	29	0.572597	1.78286	0.0011741	0.29782	0.287541
GO:0042391	regulation of membrane potential	389	0.331097	1.36413	0.00132565	0.29782	0.287541
GO:0051965	positive regulation of synapse assembly	58	0.479878	1.68771	0.00138111	0.29782	0.287541
GO:0046323	glucose import	66	0.464616	1.66492	0.00144226	0.29782	0.287541
GO:0045143	homologous chromosome segregation	43	-0.408093	-1.80264	0.00150283	0.29782	0.287541
GO:0051056	regulation of small GTPase mediated signal transduction	290	0.344697	1.40461	0.00150573	0.29782	0.287541
GO:0045907	positive regulation of vasoconstriction	30	-0.469816	-1.89768	0.00151341	0.29782	0.287541
GO:0050808	synapse organization	274	0.348029	1.41463	0.00151442	0.29782	0.287541
GO:0021782	glial cell development	87	0.434854	1.61529	0.00152446	0.29782	0.287541
GO:0006892	post-Golgi vesicle-mediated transport	85	0.436975	1.61862	0.0015678	0.29782	0.287541
GO:0002446	neutrophil mediated immunity	417	0.325895	1.34563	0.00157037	0.29782	0.287541
GO:0061951	establishment of protein localization to plasma membrane	39	0.525061	1.72976	0.00165353	0.29782	0.287541
GO:0002444	myeloid leukocyte mediated immunity	456	0.321573	1.33137	0.00165589	0.29782	0.287541
GO:0034284	response to monosaccharide	180	0.372802	1.48043	0.00170817	0.29782	0.287541
GO:0032366	intracellular sterol transport	17	0.647972	1.79118	0.00175345	0.29782	0.287541
GO:0032367	intracellular cholesterol transport	17	0.647972	1.79118	0.00175345	0.29782	0.287541
GO:0043547	positive regulation of GTPase activity	341	0.334532	1.37194	0.00177712	0.29782	0.287541
GO:0001667	ameboidal-type cell migration	319	0.337701	1.38147	0.0017904	0.29782	0.287541
GO:0010976	positive regulation of neuron projection development	234	0.354968	1.43176	0.00188406	0.298844	0.28853
GO:0009743	response to carbohydrate	198	0.365082	1.45865	0.00189922	0.298844	0.28853
GO:0048639	positive regulation of developmental growth	152	0.382592	1.50072	0.00209787	0.314315	0.303467
GO:0034765	regulation of ion transmembrane transport	391	0.326484	1.34536	0.00210551	0.314315	0.303467
GO:0007611	learning or memory	214	0.358287	1.43801	0.0022483	0.322733	0.311594
GO:2000649	regulation of sodium ion transmembrane transporter activity	44	0.501469	1.68752	0.00229422	0.322733	0.311594
GO:0032409	regulation of transporter activity	225	0.354771	1.42789	0.00233477	0.322733	0.311594
GO:0032365	intracellular lipid transport	26	0.572575	1.74305	0.0023869	0.322733	0.311594
GO:0010881	regulation of cardiac muscle contraction by regulation of the release of sequestered calcium ion	18	0.629525	1.76457	0.00243907	0.322733	0.311594
GO:0061001	regulation of dendritic spine morphogenesis	35	0.527592	1.70409	0.00266547	0.338082	0.326413
GO:0050769	positive regulation of neurogenesis	390	0.324131	1.33555	0.00278637	0.338082	0.326413
GO:0009749	response to glucose	172	0.369652	1.4634	0.00282432	0.338082	0.326413
GO:0002283	neutrophil activation involved in immune response	409	0.321638	1.32725	0.00288074	0.338082	0.326413
GO:0043312	neutrophil degranulation	406	0.321878	1.32796	0.00290491	0.338082	0.326413
GO:0006020	inositol metabolic process	10	0.726675	1.75031	0.00298008	0.338082	0.326413
GO:1990138	neuron projection extension	144	0.381735	1.49091	0.00299722	0.338082	0.326413
GO:0016311	dephosphorylation	408	0.320888	1.32405	0.00316109	0.338082	0.326413
GO:1905037	autophagosome organization	84	0.425659	1.57441	0.00319382	0.338082	0.326413
GO:0043087	regulation of GTPase activity	410	0.320542	1.32283	0.00320501	0.338082	0.326413
GO:0009746	response to hexose	176	0.366329	1.45247	0.00324473	0.338082	0.326413
GO:0014003	oligodendrocyte development	38	0.51259	1.68099	0.0032519	0.338082	0.326413
GO:0010975	regulation of neuron projection development	408	0.319707	1.31918	0.00360253	0.350467	0.33837
GO:1903514	release of sequestered calcium ion into cytosol by endoplasmic reticulum	29	0.545372	1.69809	0.0037022	0.350467	0.33837
GO:0015800	acidic amino acid transport	56	0.464374	1.62443	0.0037088	0.350467	0.33837
GO:0061178	regulation of insulin secretion involved in cellular response to glucose stimulus	46	0.486075	1.64816	0.00373429	0.350467	0.33837
GO:0043299	leukocyte degranulation	447	0.315295	1.30458	0.00380429	0.350467	0.33837
GO:0060078	regulation of postsynaptic membrane potential	116	0.394602	1.51186	0.0038303	0.350467	0.33837
GO:0001678	cellular glucose homeostasis	119	0.392488	1.50742	0.00385627	0.350467	0.33837
GO:0002275	myeloid cell activation involved in immune response	454	0.314258	1.30091	0.00394515	0.350467	0.33837
GO:0030316	osteoclast differentiation	71	0.437512	1.58369	0.00405857	0.350467	0.33837
GO:0006893	Golgi to plasma membrane transport	43	0.491861	1.6487	0.00409221	0.350467	0.33837
GO:0098869	cellular oxidant detoxification	84	0.421053	1.55738	0.00411572	0.350467	0.33837
GO:0046326	positive regulation of glucose import	38	0.506766	1.66189	0.00418622	0.350467	0.33837
GO:0048638	regulation of developmental growth	277	0.33656	1.36871	0.00419521	0.350467	0.33837
GO:0045666	positive regulation of neuron differentiation	309	0.330682	1.35112	0.0042918	0.350467	0.33837
GO:0050850	positive regulation of calcium-mediated signaling	32	0.528373	1.67785	0.00429822	0.350467	0.33837
GO:0099565	chemical synaptic transmission, postsynaptic	111	0.396034	1.51082	0.00435435	0.350467	0.33837
GO:0060079	excitatory postsynaptic potential	95	0.408674	1.53335	0.00449013	0.350467	0.33837
GO:0048167	regulation of synaptic plasticity	158	0.369137	1.45225	0.00454892	0.350467	0.33837
GO:0050804	modulation of chemical synaptic transmission	311	0.329568	1.3469	0.00459749	0.350467	0.33837
GO:0099177	regulation of trans-synaptic signaling	311	0.329568	1.3469	0.00459749	0.350467	0.33837
GO:0035637	multicellular organismal signaling	178	0.360966	1.43234	0.00463516	0.350467	0.33837
GO:0016601	Rac protein signal transduction	36	0.510356	1.65695	0.00481615	0.359483	0.347075
GO:0010880	regulation of release of sequestered calcium ion into cytosol by sarcoplasmic reticulum	24	0.564137	1.68824	0.00508059	0.365825	0.353199
GO:0010720	positive regulation of cell development	443	0.313002	1.29476	0.00510828	0.365825	0.353199
GO:0010828	positive regulation of glucose transmembrane transport	43	0.486743	1.63155	0.00510889	0.365825	0.353199
GO:1900077	negative regulation of cellular response to insulin stimulus	28	-0.445216	-1.76464	0.00515247	0.365825	0.353199
GO:0070862	negative regulation of protein exit from endoplasmic reticulum	10	-0.671795	-1.93229	0.0053309	0.373934	0.361027
GO:0031346	positive regulation of cell projection organization	315	0.327037	1.33722	0.0055666	0.382722	0.369513
GO:0035725	sodium ion transmembrane transport	125	0.383019	1.47775	0.00558767	0.382722	0.369513
GO:1990748	cellular detoxification	88	0.409955	1.52496	0.00591163	0.396132	0.38246
GO:0032412	regulation of ion transmembrane transporter activity	208	0.347912	1.39416	0.00596778	0.396132	0.38246
GO:0008645	hexose transmembrane transport	99	0.399574	1.50601	0.00608737	0.396132	0.38246
GO:1904659	glucose transmembrane transport	93	0.404797	1.5152	0.00615761	0.396132	0.38246
GO:0046324	regulation of glucose import	56	0.452625	1.58333	0.00635201	0.396132	0.38246
GO:0010763	positive regulation of fibroblast migration	11	0.681533	1.68539	0.00666898	0.396132	0.38246
GO:0000045	autophagosome assembly	81	0.41507	1.52827	0.00667634	0.396132	0.38246
GO:0007223	Wnt signaling pathway, calcium modulating pathway	35	0.504837	1.63059	0.00677825	0.396132	0.38246
GO:0046839	phospholipid dephosphorylation	36	0.501537	1.62832	0.0067935	0.396132	0.38246
GO:0031647	regulation of protein stability	224	0.341869	1.37568	0.00685294	0.396132	0.38246
GO:0060560	developmental growth involved in morphogenesis	204	0.346997	1.38896	0.00696649	0.396132	0.38246
GO:0010631	epithelial cell migration	232	0.339585	1.36909	0.0071341	0.396132	0.38246
GO:0045637	regulation of myeloid cell differentiation	207	0.3456	1.38451	0.00727323	0.396132	0.38246
GO:0050803	regulation of synapse structure or activity	158	0.361973	1.42407	0.00728934	0.396132	0.38246
GO:0042119	neutrophil activation	416	0.311911	1.28781	0.00739043	0.396132	0.38246
GO:0001921	positive regulation of receptor recycling	13	0.649662	1.67906	0.00740361	0.396132	0.38246
GO:0106027	neuron projection organization	70	0.426477	1.54073	0.00740377	0.396132	0.38246
GO:0090132	epithelium migration	234	0.338409	1.36497	0.00753322	0.396132	0.38246
GO:0014808	release of sequestered calcium ion into cytosol by sarcoplasmic reticulum	28	0.530857	1.64149	0.00753625	0.396132	0.38246
GO:0070202	regulation of establishment of protein localization to chromosome	10	0.694795	1.67352	0.00756087	0.396132	0.38246
GO:0007628	adult walking behavior	24	0.55259	1.65368	0.00756612	0.396132	0.38246
GO:1904063	negative regulation of cation transmembrane transport	73	0.421888	1.53267	0.0077067	0.396132	0.38246
GO:0007033	vacuole organization	135	0.371488	1.44313	0.00785389	0.396132	0.38246
GO:0006027	glycosaminoglycan catabolic process	52	0.455045	1.57356	0.00798792	0.396132	0.38246
GO:0035773	insulin secretion involved in cellular response to glucose stimulus	53	0.452546	1.56969	0.00812428	0.396132	0.38246
GO:0030032	lamellipodium assembly	52	0.454548	1.57184	0.00815103	0.396132	0.38246
GO:0010882	regulation of cardiac muscle contraction by calcium ion signaling	23	0.55625	1.64911	0.00822469	0.396132	0.38246
GO:0036230	granulocyte activation	421	0.310324	1.28172	0.00826972	0.396132	0.38246
GO:0007215	glutamate receptor signaling pathway	79	0.412955	1.51583	0.00827812	0.396132	0.38246
GO:0090130	tissue migration	238	0.336278	1.35756	0.00828642	0.396132	0.38246
GO:0007266	Rho protein signal transduction	172	0.354581	1.40373	0.00829128	0.396132	0.38246
GO:0061337	cardiac conduction	130	0.373128	1.44476	0.00839123	0.396132	0.38246
GO:0042738	exogenous drug catabolic process	18	-0.510437	-1.78282	0.00849784	0.396132	0.38246
GO:0032527	protein exit from endoplasmic reticulum	37	-0.383717	-1.63548	0.00855713	0.396132	0.38246
GO:0006040	amino sugar metabolic process	35	0.498269	1.60938	0.00865536	0.396132	0.38246
GO:0050848	regulation of calcium-mediated signaling	71	0.421463	1.52559	0.00878009	0.396132	0.38246
GO:0010717	regulation of epithelial to mesenchymal transition	78	0.412939	1.51327	0.00880262	0.396132	0.38246
GO:0007088	regulation of mitotic nuclear division	138	0.367912	1.43193	0.00886366	0.396132	0.38246
GO:0043271	negative regulation of ion transport	121	0.37728	1.45126	0.00889449	0.396132	0.38246
GO:0006613	cotranslational protein targeting to membrane	86	0.403772	1.4977	0.00891596	0.396132	0.38246
GO:0018904	ether metabolic process	14	-0.5616	-1.81194	0.00899956	0.396132	0.38246
GO:0006044	N-acetylglucosamine metabolic process	16	0.608468	1.6574	0.00900317	0.396132	0.38246
GO:0045927	positive regulation of growth	223	0.338544	1.36192	0.00902257	0.396132	0.38246
GO:0019373	epoxygenase P450 pathway	15	-0.546618	-1.8039	0.00905264	0.396132	0.38246
GO:0043647	inositol phosphate metabolic process	58	0.440335	1.54864	0.00916788	0.396132	0.38246
GO:0051284	positive regulation of sequestering of calcium ion	13	0.641536	1.65806	0.00921682	0.396132	0.38246
GO:2001257	regulation of cation channel activity	138	0.367301	1.42955	0.00923151	0.396132	0.38246
GO:1900182	positive regulation of protein localization to nucleus	60	0.43657	1.54305	0.00926571	0.396132	0.38246
GO:0022898	regulation of transmembrane transporter activity	213	0.340616	1.36676	0.00928137	0.396132	0.38246
GO:0043249	erythrocyte maturation	13	-0.577125	-1.81689	0.00945858	0.396132	0.38246
GO:0009395	phospholipid catabolic process	32	0.506238	1.60756	0.00952812	0.396132	0.38246
GO:0098754	detoxification	101	0.389575	1.47161	0.00960764	0.396132	0.38246
GO:0015749	monosaccharide transmembrane transport	100	0.390235	1.47251	0.00969367	0.396132	0.38246
GO:0048013	ephrin receptor signaling pathway	84	0.403929	1.49404	0.00976111	0.396132	0.38246
GO:0001501	skeletal system development	422	0.308565	1.27457	0.00977072	0.396132	0.38246
GO:0000288	nuclear-transcribed mRNA catabolic process, deadenylation-dependent decay	70	-0.301482	-1.48013	0.0100431	0.396132	0.38246
GO:2000059	negative regulation of ubiquitin-dependent protein catabolic process	37	0.487456	1.59077	0.0100511	0.396132	0.38246
GO:1902305	regulation of sodium ion transmembrane transport	54	0.445331	1.5493	0.0101044	0.396132	0.38246
GO:0030282	bone mineralization	86	0.401144	1.48796	0.010188	0.396132	0.38246
GO:0099173	postsynapse organization	94	0.39391	1.47615	0.01024	0.396132	0.38246
GO:0061003	positive regulation of dendritic spine morphogenesis	17	0.594824	1.64426	0.0102462	0.396132	0.38246
GO:0045670	regulation of osteoclast differentiation	51	0.450635	1.55353	0.0102827	0.396132	0.38246
GO:1901160	primary amino compound metabolic process	10	-0.640865	-1.84333	0.0103031	0.396132	0.38246
GO:0007129	synapsis	30	-0.410882	-1.65964	0.0103234	0.396132	0.38246
GO:0032956	regulation of actin cytoskeleton organization	281	0.325271	1.32363	0.0103352	0.396132	0.38246
GO:0006914	autophagy	425	0.3077	1.27124	0.0103422	0.396132	0.38246
GO:0061919	process utilizing autophagic mechanism	425	0.3077	1.27124	0.0103422	0.396132	0.38246
GO:0035357	peroxisome proliferator activated receptor signaling pathway	17	0.593685	1.64111	0.0105935	0.39953	0.38574
GO:0010458	exit from mitosis	26	0.531092	1.61677	0.0106135	0.39953	0.38574
GO:0097061	dendritic spine organization	67	0.42252	1.51725	0.0106367	0.39953	0.38574
GO:1903524	positive regulation of blood circulation	61	-0.313916	-1.49927	0.0110294	0.411622	0.397415
GO:0050708	regulation of protein secretion	362	0.313082	1.28676	0.0113164	0.419645	0.405161
GO:0014002	astrocyte development	29	0.51387	1.6	0.0114262	0.421035	0.406503
GO:0099175	regulation of postsynapse organization	53	0.443845	1.53951	0.011548	0.422564	0.407979
GO:0048588	developmental cell growth	186	0.344869	1.37247	0.0116817	0.422564	0.407979
GO:0072678	T cell migration	39	-0.366425	-1.5817	0.0116855	0.422564	0.407979
GO:0051797	regulation of hair follicle development	14	0.620198	1.63424	0.0118193	0.424766	0.410105
GO:0044089	positive regulation of cellular component biogenesis	448	0.304168	1.25864	0.011923	0.425864	0.411166
GO:0051785	positive regulation of nuclear division	49	0.450526	1.54327	0.0120999	0.428594	0.413801
GO:0097120	receptor localization to synapse	32	0.4995	1.58616	0.0121467	0.428594	0.413801
GO:0033598	mammary gland epithelial cell proliferation	22	0.549809	1.61401	0.0123199	0.431498	0.416604
GO:0043568	positive regulation of insulin-like growth factor receptor signaling pathway	11	0.659317	1.63046	0.0123772	0.431498	0.416604
GO:0046578	regulation of Ras protein signal transduction	212	0.336355	1.34932	0.0127407	0.436693	0.421621
GO:0010827	regulation of glucose transmembrane transport	68	0.41685	1.49991	0.0127985	0.436693	0.421621
GO:0051280	negative regulation of release of sequestered calcium ion into cytosol	12	0.641802	1.62448	0.0129299	0.436693	0.421621
GO:0006470	protein dephosphorylation	269	0.324274	1.317	0.0130294	0.436693	0.421621
GO:0022010	central nervous system myelination	16	0.595304	1.62154	0.0130429	0.436693	0.421621
GO:0032291	axon ensheathment in central nervous system	16	0.595304	1.62154	0.0130429	0.436693	0.421621
GO:0016180	snRNA processing	23	-0.446059	-1.67438	0.0130513	0.436693	0.421621
GO:0002761	regulation of myeloid leukocyte differentiation	95	0.387661	1.45451	0.0133236	0.438781	0.423636
GO:0006637	acyl-CoA metabolic process	90	0.391762	1.4609	0.013457	0.438781	0.423636
GO:0035383	thioester metabolic process	90	0.391762	1.4609	0.013457	0.438781	0.423636
GO:0051493	regulation of cytoskeleton organization	437	0.303781	1.25608	0.0134873	0.438781	0.423636
GO:0031214	biomineral tissue development	109	0.377167	1.43618	0.0135997	0.438781	0.423636
GO:0060732	positive regulation of inositol phosphate biosynthetic process	10	-0.624612	-1.79658	0.0136203	0.438781	0.423636
GO:0043928	exonucleolytic nuclear-transcribed mRNA catabolic process involved in deadenylation-dependent decay	31	-0.396263	-1.61405	0.0136413	0.438781	0.423636
GO:0035358	regulation of peroxisome proliferator activated receptor signaling pathway	10	0.671177	1.61663	0.0138245	0.442231	0.426968
GO:0090659	walking behavior	25	0.527873	1.59367	0.0139091	0.442507	0.427234
GO:1904814	regulation of protein localization to chromosome, telomeric region	12	0.638593	1.61636	0.0140406	0.443685	0.428371
GO:0032691	negative regulation of interleukin-1 beta production	15	-0.525771	-1.7351	0.0141545	0.443685	0.428371
GO:0009855	determination of bilateral symmetry	109	0.376359	1.4331	0.0141748	0.443685	0.428371
GO:0009650	UV protection	12	0.637935	1.61469	0.0142799	0.444586	0.429241
GO:1900078	positive regulation of cellular response to insulin stimulus	28	0.51127	1.58093	0.014394	0.445756	0.43037
GO:0048675	axon extension	107	0.377205	1.43373	0.0145083	0.445794	0.430408
GO:0009267	cellular response to starvation	126	0.365403	1.4108	0.014709	0.445794	0.430408
GO:0008016	regulation of heart contraction	209	0.335002	1.34283	0.0147582	0.445794	0.430408
GO:0021527	spinal cord association neuron differentiation	13	-0.555377	-1.74843	0.0147713	0.445794	0.430408
GO:1902170	cellular response to reactive nitrogen species	17	0.581349	1.60701	0.0147781	0.445794	0.430408
GO:0033500	carbohydrate homeostasis	193	0.338978	1.35216	0.0150853	0.450394	0.434849
GO:0042593	glucose homeostasis	193	0.338978	1.35216	0.0150853	0.450394	0.434849
GO:0034219	carbohydrate transmembrane transport	102	0.379493	1.43505	0.0152788	0.45114	0.435569
GO:0045724	positive regulation of cilium assembly	19	-0.4747	-1.68513	0.0152878	0.45114	0.435569
GO:0042307	positive regulation of protein import into nucleus	30	0.500165	1.5681	0.0154099	0.45114	0.435569
GO:0010761	fibroblast migration	36	0.478135	1.55234	0.0154519	0.45114	0.435569
GO:0007220	Notch receptor processing	16	0.588754	1.6037	0.0155128	0.45114	0.435569
GO:0008344	adult locomotory behavior	67	0.41351	1.4849	0.0156292	0.45114	0.435569
GO:0006650	glycerophospholipid metabolic process	311	0.315468	1.28927	0.0156527	0.45114	0.435569
GO:0071322	cellular response to carbohydrate stimulus	115	0.37018	1.41709	0.0159525	0.455994	0.440255
GO:0046627	negative regulation of insulin receptor signaling pathway	27	-0.412132	-1.61733	0.0159778	0.455994	0.440255
GO:1903725	regulation of phospholipid metabolic process	63	0.418385	1.48928	0.0161595	0.4588	0.442965
GO:0045047	protein targeting to ER	91	0.386707	1.44383	0.0163823	0.4588	0.442965
GO:0007272	ensheathment of neurons	98	0.381003	1.4345	0.0163914	0.4588	0.442965
GO:0008366	axon ensheathment	98	0.381003	1.4345	0.0163914	0.4588	0.442965
GO:0003407	neural retina development	55	0.430555	1.50203	0.0166591	0.464062	0.448045
GO:0050849	negative regulation of calcium-mediated signaling	15	0.596132	1.59801	0.0167398	0.464092	0.448074
GO:1901071	glucosamine-containing compound metabolic process	24	0.526393	1.57529	0.0171199	0.468778	0.452598
GO:0051775	response to redox state	10	0.662057	1.59467	0.0171539	0.468778	0.452598
GO:0046488	phosphatidylinositol metabolic process	191	0.337442	1.34521	0.0172068	0.468778	0.452598
GO:0071333	cellular response to glucose stimulus	107	0.373645	1.4202	0.0172309	0.468778	0.452598
GO:0048048	embryonic eye morphogenesis	34	-0.373185	-1.55717	0.0175648	0.469066	0.452876
GO:0006661	phosphatidylinositol biosynthetic process	132	0.358666	1.39064	0.0177523	0.469066	0.452876
GO:1904591	positive regulation of protein import	33	0.484221	1.54678	0.0177548	0.469066	0.452876
GO:0010107	potassium ion import	35	0.477081	1.54094	0.0177654	0.469066	0.452876
GO:0031572	G2 DNA damage checkpoint	29	0.499678	1.55581	0.0178121	0.469066	0.452876
GO:0032970	regulation of actin filament-based process	322	0.312416	1.27847	0.017835	0.469066	0.452876
GO:0010644	cell communication by electrical coupling	26	0.513942	1.56456	0.0178826	0.469066	0.452876
GO:0051783	regulation of nuclear division	154	0.348953	1.37015	0.0178861	0.469066	0.452876
GO:0009799	specification of symmetry	110	0.37066	1.4127	0.0182544	0.472343	0.45604
GO:0045933	positive regulation of muscle contraction	47	-0.33016	-1.48935	0.0183295	0.472343	0.45604
GO:0022404	molting cycle process	72	0.403274	1.46242	0.018382	0.472343	0.45604
GO:0022405	hair cycle process	72	0.403274	1.46242	0.018382	0.472343	0.45604
GO:0044090	positive regulation of vacuole organization	11	0.642757	1.5895	0.0184167	0.472343	0.45604
GO:0016236	macroautophagy	258	0.321256	1.30223	0.018645	0.473789	0.457436
GO:0090092	regulation of transmembrane receptor protein serine/threonine kinase signaling pathway	186	0.337442	1.34291	0.0187172	0.473789	0.457436
GO:0043455	regulation of secondary metabolic process	12	0.626722	1.58631	0.0189184	0.473789	0.457436
GO:0008361	regulation of cell size	152	0.348607	1.36741	0.0189199	0.473789	0.457436
GO:0035437	maintenance of protein localization in endoplasmic reticulum	12	-0.562053	-1.7219	0.0189508	0.473789	0.457436
GO:2000651	positive regulation of sodium ion transmembrane transporter activity	13	0.61377	1.58629	0.0189613	0.473789	0.457436
GO:1903729	regulation of plasma membrane organization	12	0.626202	1.585	0.0191482	0.476413	0.459969
GO:0002791	regulation of peptide secretion	390	0.304004	1.25262	0.0193254	0.4772	0.46073
GO:0006865	amino acid transport	121	0.362717	1.39525	0.0193971	0.4772	0.46073
GO:0051963	regulation of synapse assembly	76	0.397169	1.45051	0.0196446	0.4772	0.46073
GO:0060314	regulation of ryanodine-sensitive calcium-release channel activity	24	0.521594	1.56093	0.0196864	0.4772	0.46073
GO:0002347	response to tumor cell	20	0.546429	1.56987	0.0196956	0.4772	0.46073
GO:0061572	actin filament bundle organization	131	0.357232	1.38416	0.0197103	0.4772	0.46073
GO:0001942	hair follicle development	70	0.403816	1.45886	0.0198197	0.4772	0.46073
GO:0060074	synapse maturation	16	0.579311	1.57798	0.0198355	0.4772	0.46073
GO:0070296	sarcoplasmic reticulum calcium ion transport	31	0.488033	1.54019	0.0199197	0.477252	0.46078
GO:0048266	behavioral response to pain	10	0.655017	1.57771	0.0201925	0.477596	0.461112
GO:0048709	oligodendrocyte differentiation	87	0.385412	1.43163	0.0201953	0.477596	0.461112
GO:0071331	cellular response to hexose stimulus	109	0.369034	1.40521	0.0202608	0.477596	0.461112
GO:0034766	negative regulation of ion transmembrane transport	83	0.388994	1.4367	0.0202806	0.477596	0.461112
GO:0043967	histone H4 acetylation	60	0.417057	1.47409	0.020401	0.477596	0.461112
GO:0010332	response to gamma radiation	50	-0.320513	-1.46628	0.0204262	0.477596	0.461112
GO:0050807	regulation of synapse organization	147	0.348971	1.36523	0.0206792	0.481577	0.464955
GO:0071326	cellular response to monosaccharide stimulus	110	0.367793	1.40177	0.0208534	0.483698	0.467003
GO:1904816	positive regulation of protein localization to chromosome, telomeric region	10	0.652752	1.57225	0.0212086	0.485493	0.468736
GO:0045931	positive regulation of mitotic cell cycle	124	0.359248	1.385	0.0213086	0.485493	0.468736
GO:0010762	regulation of fibroblast migration	26	0.507525	1.54503	0.0215018	0.485493	0.468736
GO:1901317	regulation of flagellated sperm motility	11	-0.573887	-1.70616	0.0215522	0.485493	0.468736
GO:0033032	regulation of myeloid cell apoptotic process	25	0.512842	1.54829	0.0215851	0.485493	0.468736
GO:0006026	aminoglycan catabolic process	59	0.416909	1.46993	0.021687	0.485493	0.468736
GO:0010591	regulation of lamellipodium assembly	24	0.517955	1.55004	0.0217114	0.485493	0.468736
GO:2001258	negative regulation of cation channel activity	38	0.461239	1.51259	0.0217538	0.485493	0.468736
GO:0010718	positive regulation of epithelial to mesenchymal transition	45	0.443188	1.49721	0.0217592	0.485493	0.468736
GO:0006363	termination of RNA polymerase I transcription	25	0.512518	1.54731	0.0217646	0.485493	0.468736
GO:0090383	phagosome acidification	22	0.528994	1.55291	0.021926	0.48551	0.468753
GO:0035333	Notch receptor processing, ligand-dependent	13	0.60778	1.57081	0.0219322	0.48551	0.468753
GO:0030072	peptide hormone secretion	220	0.326198	1.31125	0.022183	0.487615	0.470785
GO:0042552	myelination	97	0.375263	1.41127	0.0221948	0.487615	0.470785
GO:0050796	regulation of insulin secretion	155	0.344326	1.35267	0.0224198	0.490706	0.473769
GO:0072599	establishment of protein localization to endoplasmic reticulum	95	0.376364	1.41213	0.0225804	0.491892	0.474914
GO:0071312	cellular response to alkaloid	31	0.483495	1.52587	0.0227457	0.491892	0.474914
GO:0060997	dendritic spine morphogenesis	49	0.433376	1.48452	0.0227824	0.491892	0.474914
GO:0007156	homophilic cell adhesion via plasma membrane adhesion molecules	132	0.353892	1.37213	0.0228119	0.491892	0.474914
GO:0008306	associative learning	62	0.410364	1.45726	0.02331	0.496183	0.479058
GO:0032535	regulation of cellular component size	317	0.309395	1.2654	0.0235266	0.496183	0.479058
GO:1904062	regulation of cation transmembrane transport	263	0.31709	1.28651	0.0235394	0.496183	0.479058
GO:0009914	hormone transport	284	0.313843	1.27774	0.0235946	0.496183	0.479058
GO:0006614	SRP-dependent cotranslational protein targeting to membrane	81	0.387462	1.42661	0.0236166	0.496183	0.479058
GO:0014047	glutamate secretion	38	0.458495	1.50359	0.0236824	0.496183	0.479058
GO:0007435	salivary gland morphogenesis	31	0.482086	1.52142	0.0236917	0.496183	0.479058
GO:0044772	mitotic cell cycle phase transition	481	0.294369	1.22058	0.0236927	0.496183	0.479058
GO:0002790	peptide secretion	492	0.293551	1.21794	0.0239757	0.500309	0.483041
GO:1902993	positive regulation of amyloid precursor protein catabolic process	12	0.61621	1.5597	0.0242299	0.501102	0.483807
GO:0031111	negative regulation of microtubule polymerization or depolymerization	31	0.481234	1.51873	0.024281	0.501102	0.483807
GO:0090280	positive regulation of calcium ion import	15	-0.498271	-1.64435	0.0244569	0.501102	0.483807
GO:0003333	amino acid transmembrane transport	67	0.402316	1.4447	0.0244726	0.501102	0.483807
GO:0090100	positive regulation of transmembrane receptor protein serine/threonine kinase signaling pathway	84	0.383479	1.4184	0.0246599	0.501102	0.483807
GO:1904738	vascular associated smooth muscle cell migration	19	0.545315	1.54811	0.0247263	0.501102	0.483807
GO:1904752	regulation of vascular associated smooth muscle cell migration	19	0.545315	1.54811	0.0247263	0.501102	0.483807
GO:0055064	chloride ion homeostasis	12	0.615109	1.55692	0.0248443	0.501102	0.483807
GO:0070307	lens fiber cell development	12	0.615087	1.55686	0.0248634	0.501102	0.483807
GO:0071711	basement membrane organization	18	0.552568	1.54886	0.024903	0.501102	0.483807
GO:0008643	carbohydrate transport	124	0.356191	1.37322	0.0249604	0.501102	0.483807
GO:0030970	retrograde protein transport, ER to cytosol	26	-0.4	-1.55372	0.0252959	0.503114	0.485749
GO:1903513	endoplasmic reticulum to cytosol transport	26	-0.4	-1.55372	0.0252959	0.503114	0.485749
GO:0040014	regulation of multicellular organism growth	63	0.40666	1.44754	0.0253913	0.503114	0.485749
GO:0070199	establishment of protein localization to chromosome	22	0.523111	1.53564	0.0256174	0.503114	0.485749
GO:0010592	positive regulation of lamellipodium assembly	13	0.601139	1.55365	0.0256636	0.503114	0.485749
GO:0099072	regulation of postsynaptic membrane neurotransmitter receptor levels	21	0.529419	1.538	0.0256706	0.503114	0.485749
GO:0098876	vesicle-mediated transport to the plasma membrane	63	0.406308	1.44629	0.0257349	0.503114	0.485749
GO:0034308	primary alcohol metabolic process	48	0.431639	1.47379	0.025752	0.503114	0.485749
GO:0070192	chromosome organization involved in meiotic cell cycle	51	-0.311775	-1.43276	0.0259106	0.504519	0.487106
GO:0051017	actin filament bundle assembly	128	0.352842	1.36431	0.02632	0.509071	0.491501
GO:0035930	corticosteroid hormone secretion	13	0.599938	1.55054	0.0264067	0.509071	0.491501
GO:2000846	regulation of corticosteroid hormone secretion	13	0.599938	1.55054	0.0264067	0.509071	0.491501
GO:0044272	sulfur compound biosynthetic process	161	0.339043	1.33579	0.0266877	0.512792	0.495093
GO:0030073	insulin secretion	183	0.332061	1.32008	0.0271035	0.518237	0.50035
GO:0031532	actin cytoskeleton reorganization	96	0.371427	1.39522	0.0271491	0.518237	0.50035
GO:0042476	odontogenesis	102	0.366848	1.38723	0.0274895	0.522488	0.504454
GO:0006221	pyrimidine nucleotide biosynthetic process	29	0.48498	1.51005	0.0275513	0.522488	0.504454
GO:0035249	synaptic transmission, glutamatergic	87	0.377868	1.40361	0.0278401	0.522831	0.504785
GO:0007157	heterophilic cell-cell adhesion via plasma membrane cell adhesion molecules	45	0.435833	1.47236	0.027858	0.522831	0.504785
GO:0008652	cellular amino acid biosynthetic process	70	0.395044	1.42717	0.0279531	0.522831	0.504785
GO:0051438	regulation of ubiquitin-protein transferase activity	40	0.447703	1.48168	0.0280515	0.522831	0.504785
GO:0090382	phagosome maturation	36	0.458857	1.48975	0.0282165	0.522831	0.504785
GO:0046835	carbohydrate phosphorylation	22	0.518559	1.52227	0.0287691	0.522831	0.504785
GO:0023061	signal release	389	0.299074	1.23219	0.0289121	0.522831	0.504785
GO:0038093	Fc receptor signaling pathway	167	0.335439	1.32517	0.0291584	0.522831	0.504785
GO:0046777	protein autophosphorylation	213	0.323306	1.2973	0.0291971	0.522831	0.504785
GO:0046856	phosphatidylinositol dephosphorylation	24	0.506587	1.51602	0.0292825	0.522831	0.504785
GO:0061158	3'-UTR-mediated mRNA destabilization	12	-0.536058	-1.64226	0.0294189	0.522831	0.504785
GO:0098773	skin epidermis development	72	0.391356	1.4192	0.02944	0.522831	0.504785
GO:0042303	molting cycle	87	0.376271	1.39768	0.029729	0.522831	0.504785
GO:0042633	hair cycle	87	0.376271	1.39768	0.029729	0.522831	0.504785
GO:0018105	peptidyl-serine phosphorylation	252	0.315507	1.27747	0.0297614	0.522831	0.504785
GO:0006835	dicarboxylic acid transport	80	0.382666	1.40687	0.0298107	0.522831	0.504785
GO:0051058	negative regulation of small GTPase mediated signal transduction	47	0.429394	1.46102	0.0298144	0.522831	0.504785
GO:0016358	dendrite development	195	0.327188	1.30598	0.029834	0.522831	0.504785
GO:0009306	protein secretion	461	0.293078	1.21378	0.0298636	0.522831	0.504785
GO:0061564	axon development	467	0.292619	1.21232	0.0299091	0.522831	0.504785
GO:0051966	regulation of synaptic transmission, glutamatergic	64	0.400944	1.43048	0.0299114	0.522831	0.504785
GO:0006635	fatty acid beta-oxidation	64	0.400889	1.43029	0.0299778	0.522831	0.504785
GO:0002420	natural killer cell mediated cytotoxicity directed against tumor cell target	11	0.621008	1.53572	0.0299939	0.522831	0.504785
GO:0002423	natural killer cell mediated immune response to tumor cell	11	0.621008	1.53572	0.0299939	0.522831	0.504785
GO:0002855	regulation of natural killer cell mediated immune response to tumor cell	11	0.621008	1.53572	0.0299939	0.522831	0.504785
GO:0002858	regulation of natural killer cell mediated cytotoxicity directed against tumor cell target	11	0.621008	1.53572	0.0299939	0.522831	0.504785
GO:0010165	response to X-ray	32	-0.363242	-1.49198	0.0301318	0.522831	0.504785
GO:0010506	regulation of autophagy	278	0.311103	1.26539	0.0302819	0.522831	0.504785
GO:1902905	positive regulation of supramolecular fiber organization	171	0.3335	1.31975	0.0303175	0.522831	0.504785
GO:0045840	positive regulation of mitotic nuclear division	41	0.442494	1.47096	0.0303991	0.522831	0.504785
GO:0070861	regulation of protein exit from endoplasmic reticulum	21	-0.424595	-1.55263	0.0305111	0.522831	0.504785
GO:0071732	cellular response to nitric oxide	14	0.581531	1.53235	0.0305487	0.522831	0.504785
GO:0090101	negative regulation of transmembrane receptor protein serine/threonine kinase signaling pathway	97	0.367886	1.38353	0.030616	0.522831	0.504785
GO:0045671	negative regulation of osteoclast differentiation	23	0.510399	1.51318	0.0306227	0.522831	0.504785
GO:0090150	establishment of protein localization to membrane	262	0.31319	1.27045	0.0308527	0.523497	0.505428
GO:0031998	regulation of fatty acid beta-oxidation	15	0.570472	1.52922	0.0309214	0.523497	0.505428
GO:0097062	dendritic spine maintenance	17	0.551939	1.52571	0.0309351	0.523497	0.505428
GO:0043550	regulation of lipid kinase activity	45	0.432413	1.46081	0.0310214	0.523497	0.505428
GO:0035235	ionotropic glutamate receptor signaling pathway	24	0.50416	1.50875	0.0312253	0.523739	0.505663
GO:0043968	histone H2A acetylation	13	0.592298	1.5308	0.0313025	0.523739	0.505663
GO:0038095	Fc-epsilon receptor signaling pathway	108	0.359986	1.36959	0.0313056	0.523739	0.505663
GO:0090278	negative regulation of peptide hormone secretion	39	0.446557	1.47114	0.0314535	0.524138	0.506047
GO:0006662	glycerol ether metabolic process	10	-0.573927	-1.65079	0.0315095	0.524138	0.506047
GO:0045773	positive regulation of axon extension	39	0.446065	1.46952	0.0318953	0.528765	0.510515
GO:0050872	white fat cell differentiation	12	0.603855	1.52843	0.0319693	0.528765	0.510515
GO:0042475	odontogenesis of dentin-containing tooth	69	0.39244	1.4149	0.032133	0.528772	0.510521
GO:0048246	macrophage chemotaxis	26	0.49258	1.49953	0.0322989	0.528772	0.510521
GO:1903959	regulation of anion transmembrane transport	22	0.513869	1.50851	0.0323347	0.528772	0.510521
GO:0086064	cell communication by electrical coupling involved in cardiac conduction	21	0.520352	1.51166	0.0323584	0.528772	0.510521
GO:0060219	camera-type eye photoreceptor cell differentiation	15	0.568337	1.5235	0.0324238	0.528772	0.510521
GO:0002028	regulation of sodium ion transport	78	0.38211	1.40029	0.032934	0.535342	0.516865
GO:0048708	astrocyte differentiation	63	0.399385	1.42165	0.0330106	0.535342	0.516865
GO:0007409	axonogenesis	432	0.293796	1.21442	0.0333922	0.538539	0.519952
GO:0008277	regulation of G-protein coupled receptor protein signaling pathway	118	0.352723	1.35364	0.0335526	0.538539	0.519952
GO:0099632	protein transport within plasma membrane	19	0.532768	1.51249	0.0335778	0.538539	0.519952
GO:0099637	neurotransmitter receptor transport	19	0.532768	1.51249	0.0335778	0.538539	0.519952
GO:0048745	smooth muscle tissue development	19	0.532556	1.51189	0.0337418	0.538575	0.519986
GO:0010758	regulation of macrophage chemotaxis	16	0.556849	1.51679	0.0338375	0.538575	0.519986
GO:0008542	visual learning	40	0.441208	1.46018	0.0340602	0.538575	0.519986
GO:0001936	regulation of endothelial cell proliferation	104	0.36047	1.36606	0.034266	0.538575	0.519986
GO:0060393	regulation of pathway-restricted SMAD protein phosphorylation	51	0.416992	1.43755	0.0344239	0.538575	0.519986
GO:0072594	establishment of protein localization to organelle	474	0.290434	1.20378	0.0345521	0.538575	0.519986
GO:0042255	ribosome assembly	52	0.414857	1.43459	0.0346634	0.538575	0.519986
GO:1902475	L-alpha-amino acid transmembrane transport	38	0.445928	1.46238	0.0346932	0.538575	0.519986
GO:0034637	cellular carbohydrate biosynthetic process	71	0.387983	1.4044	0.0347473	0.538575	0.519986
GO:0045103	intermediate filament-based process	37	0.448719	1.46436	0.0347562	0.538575	0.519986
GO:0045104	intermediate filament cytoskeleton organization	37	0.448719	1.46436	0.0347562	0.538575	0.519986
GO:0061036	positive regulation of cartilage development	24	-0.398207	-1.5128	0.0347745	0.538575	0.519986
GO:0032881	regulation of polysaccharide metabolic process	31	0.468642	1.47899	0.0347826	0.538575	0.519986
GO:1905517	macrophage migration	29	0.476215	1.48276	0.0351672	0.542801	0.524066
GO:0046474	glycerophospholipid biosynthetic process	214	0.319997	1.28433	0.0352635	0.542801	0.524066
GO:0090218	positive regulation of lipid kinase activity	29	0.476002	1.4821	0.0353617	0.542801	0.524066
GO:0000291	nuclear-transcribed mRNA catabolic process, exonucleolytic	33	-0.353163	-1.46245	0.0354692	0.542801	0.524066
GO:0072583	clathrin-dependent endocytosis	36	0.45078	1.46352	0.0356573	0.542801	0.524066
GO:0072677	eosinophil migration	17	-0.454437	-1.55973	0.0357824	0.542801	0.524066
GO:0099590	neurotransmitter receptor internalization	11	0.612461	1.51458	0.0357929	0.542801	0.524066
GO:2000249	regulation of actin cytoskeleton reorganization	33	0.460425	1.47076	0.0358014	0.542801	0.524066
GO:1902903	regulation of supramolecular fiber organization	292	0.3066	1.24975	0.0359562	0.543733	0.524966
GO:0007612	learning	124	0.347689	1.34044	0.0368051	0.555128	0.535968
GO:0072425	signal transduction involved in G2 DNA damage checkpoint	11	0.610762	1.51038	0.0369983	0.5566	0.537389
GO:0046879	hormone secretion	274	0.3085	1.25396	0.0372128	0.558261	0.538993
GO:0030851	granulocyte differentiation	28	0.477982	1.47799	0.0373005	0.558261	0.538993
GO:0018209	peptidyl-serine modification	277	0.307947	1.25235	0.0376774	0.560302	0.540963
GO:0060389	pathway-restricted SMAD protein phosphorylation	54	0.40893	1.42266	0.0377865	0.560302	0.540963
GO:0033033	negative regulation of myeloid cell apoptotic process	13	0.583378	1.50774	0.0378257	0.560302	0.540963
GO:0030258	lipid modification	240	0.313747	1.26718	0.0378471	0.560302	0.540963
GO:0032456	endocytic recycling	33	0.458252	1.46382	0.0379496	0.560302	0.540963
GO:0035567	non-canonical Wnt signaling pathway	135	0.341961	1.32842	0.0380143	0.560302	0.540963
GO:1902991	regulation of amyloid precursor protein catabolic process	23	0.501027	1.48539	0.0385295	0.566462	0.546911
GO:0042982	amyloid precursor protein metabolic process	47	0.421074	1.43271	0.0386826	0.567236	0.547658
GO:0060452	positive regulation of cardiac muscle contraction	11	-0.537477	-1.59791	0.038777	0.567236	0.547658
GO:0043551	regulation of phosphatidylinositol 3-kinase activity	38	0.441958	1.44936	0.0388759	0.567258	0.547679
GO:0010649	regulation of cell communication by electrical coupling	11	0.60795	1.50343	0.0390765	0.568759	0.549128
GO:0042634	regulation of hair cycle	21	0.512354	1.48843	0.039231	0.569584	0.549924
GO:0048875	chemical homeostasis within a tissue	10	0.623326	1.50138	0.0393842	0.569853	0.550185
GO:0006360	transcription by RNA polymerase I	53	0.40901	1.41868	0.0396237	0.569853	0.550185
GO:0032410	negative regulation of transporter activity	70	0.385303	1.39197	0.0397347	0.569853	0.550185
GO:1903008	organelle disassembly	95	0.362638	1.36063	0.0400889	0.569853	0.550185
GO:0046580	negative regulation of Ras protein signal transduction	41	0.432975	1.43932	0.0401366	0.569853	0.550185
GO:0050679	positive regulation of epithelial cell proliferation	156	0.332892	1.30843	0.0402017	0.569853	0.550185
GO:0009112	nucleobase metabolic process	35	0.449727	1.45259	0.0402314	0.569853	0.550185
GO:0021766	hippocampus development	70	0.384951	1.3907	0.0402518	0.569853	0.550185
GO:0051494	negative regulation of cytoskeleton organization	121	0.34709	1.33513	0.0402938	0.569853	0.550185
GO:0090630	activation of GTPase activity	74	0.380504	1.38495	0.040444	0.569853	0.550185
GO:0090279	regulation of calcium ion import	29	-0.365045	-1.46081	0.0405987	0.569853	0.550185
GO:0001954	positive regulation of cell-matrix adhesion	41	0.432531	1.43784	0.0406071	0.569853	0.550185
GO:0019722	calcium-mediated signaling	147	0.335758	1.31354	0.0406749	0.569853	0.550185
GO:0009954	proximal/distal pattern formation	28	0.474509	1.46726	0.0407807	0.569853	0.550185
GO:1901186	positive regulation of ERBB signaling pathway	33	0.455241	1.4542	0.0410905	0.569853	0.550185
GO:2001275	positive regulation of glucose import in response to insulin stimulus	16	0.547816	1.49219	0.0412316	0.569853	0.550185
GO:0002834	regulation of response to tumor cell	13	0.579082	1.49664	0.0413337	0.569853	0.550185
GO:0002837	regulation of immune response to tumor cell	13	0.579082	1.49664	0.0413337	0.569853	0.550185
GO:0048017	inositol lipid-mediated signaling	139	0.338467	1.31805	0.0413587	0.569853	0.550185
GO:0110020	regulation of actomyosin structure organization	76	0.377688	1.37936	0.0415851	0.569853	0.550185
GO:1903055	positive regulation of extracellular matrix organization	16	0.547342	1.4909	0.04163	0.569853	0.550185
GO:0006582	melanin metabolic process	15	0.55667	1.49223	0.0417531	0.569853	0.550185
GO:0009100	glycoprotein metabolic process	354	0.297414	1.2214	0.0417786	0.569853	0.550185
GO:0007096	regulation of exit from mitosis	17	0.53855	1.4887	0.0418291	0.569853	0.550185
GO:0006241	CTP biosynthetic process	12	0.59083	1.49546	0.0419302	0.569853	0.550185
GO:0046036	CTP metabolic process	12	0.59083	1.49546	0.0419302	0.569853	0.550185
GO:0048715	negative regulation of oligodendrocyte differentiation	12	0.590799	1.49538	0.0419574	0.569853	0.550185
GO:0048872	homeostasis of number of cells	216	0.316445	1.27074	0.0419902	0.569853	0.550185
GO:0098693	regulation of synaptic vesicle cycle	41	0.431293	1.43373	0.042112	0.570177	0.550497
GO:1902692	regulation of neuroblast proliferation	23	0.497148	1.47389	0.0423697	0.572335	0.552581
GO:0030950	establishment or maintenance of actin cytoskeleton polarity	12	0.590081	1.49357	0.0425596	0.57357	0.553773
GO:0006605	protein targeting	368	0.295773	1.21633	0.0428356	0.574492	0.554663
GO:0050908	detection of light stimulus involved in visual perception	14	-0.480429	-1.55005	0.0429241	0.574492	0.554663
GO:0050962	detection of light stimulus involved in sensory perception	14	-0.480429	-1.55005	0.0429241	0.574492	0.554663
GO:1902004	positive regulation of amyloid-beta formation	10	0.618517	1.48979	0.0433233	0.577409	0.55748
GO:0045742	positive regulation of epidermal growth factor receptor signaling pathway	31	0.460283	1.45261	0.0433897	0.577409	0.55748
GO:0050673	epithelial cell proliferation	316	0.300813	1.23014	0.0434617	0.577409	0.55748
GO:0006790	sulfur compound metabolic process	314	0.300976	1.2305	0.0435733	0.577409	0.55748
GO:0014909	smooth muscle cell migration	64	0.390015	1.39149	0.0436379	0.577409	0.55748
GO:0030500	regulation of bone mineralization	57	0.399494	1.40134	0.0437606	0.577679	0.55774
GO:0043552	positive regulation of phosphatidylinositol 3-kinase activity	27	0.475848	1.46006	0.0438567	0.577679	0.55774
GO:0042219	cellular modified amino acid catabolic process	21	0.507312	1.47378	0.0439827	0.57803	0.55808
GO:0051315	attachment of mitotic spindle microtubules to kinetochore	10	0.617568	1.48751	0.0441334	0.578704	0.55873
GO:1902904	negative regulation of supramolecular fiber organization	114	0.348289	1.33218	0.0445953	0.580042	0.560022
GO:0010310	regulation of hydrogen peroxide metabolic process	12	0.587754	1.48768	0.0446138	0.580042	0.560022
GO:0048015	phosphatidylinositol-mediated signaling	137	0.337578	1.31309	0.0446794	0.580042	0.560022
GO:0097581	lamellipodium organization	70	0.38193	1.37979	0.0446965	0.580042	0.560022
GO:0051648	vesicle localization	238	0.311204	1.25633	0.0447336	0.580042	0.560022
GO:0042438	melanin biosynthetic process	14	0.563399	1.48457	0.0449553	0.580651	0.560609
GO:0009235	cobalamin metabolic process	21	-0.406791	-1.48752	0.04498	0.580651	0.560609
GO:0007127	meiosis I	87	-0.25216	-1.28926	0.0451718	0.581837	0.561755
GO:0090220	chromosome localization to nuclear envelope involved in homologous chromosome segregation	11	-0.527007	-1.56679	0.045391	0.583369	0.563234
GO:0044550	secondary metabolite biosynthetic process	24	0.488742	1.46261	0.0456345	0.584409	0.564238
GO:0046883	regulation of hormone secretion	234	0.311526	1.25653	0.0456726	0.584409	0.564238
GO:1902600	proton transmembrane transport	120	0.344532	1.32427	0.0460564	0.588027	0.567731
GO:0010288	response to lead ion	18	0.525663	1.47344	0.046421	0.588538	0.568225
GO:0015682	ferric iron transport	35	0.444291	1.43503	0.0465478	0.588538	0.568225
GO:0072512	trivalent inorganic cation transport	35	0.444291	1.43503	0.0465478	0.588538	0.568225
GO:0035418	protein localization to synapse	33	0.45056	1.43925	0.0466356	0.588538	0.568225
GO:0015813	L-glutamate transmembrane transport	21	0.5045	1.46561	0.0468224	0.588538	0.568225
GO:0048813	dendrite morphogenesis	123	0.342699	1.32021	0.0468869	0.588538	0.568225
GO:0006906	vesicle fusion	133	0.338168	1.31206	0.0469068	0.588538	0.568225
GO:0048821	erythrocyte development	29	-0.359132	-1.43715	0.0469853	0.588538	0.568225
GO:0042987	amyloid precursor protein catabolic process	32	0.453634	1.44052	0.0470163	0.588538	0.568225
GO:0039694	viral RNA genome replication	22	-0.397838	-1.47467	0.0471073	0.588538	0.568225
GO:0006361	transcription initiation from RNA polymerase I promoter	31	0.456923	1.44201	0.0472244	0.588738	0.568417
GO:0031069	hair follicle morphogenesis	23	0.49247	1.46002	0.0473273	0.58876	0.568439
GO:0021761	limbic system development	93	0.359686	1.34635	0.0476946	0.592046	0.571611
GO:0034397	telomere localization	12	-0.505072	-1.54734	0.0477948	0.592046	0.571611
GO:1903829	positive regulation of cellular protein localization	314	0.299489	1.22442	0.0479733	0.592995	0.572528
GO:0009148	pyrimidine nucleoside triphosphate biosynthetic process	17	0.531542	1.46933	0.0485749	0.59749	0.576867
GO:0043112	receptor metabolic process	153	0.329926	1.2948	0.0486811	0.59749	0.576867
GO:0061157	mRNA destabilization	22	-0.396183	-1.46853	0.0487107	0.59749	0.576867
GO:0001919	regulation of receptor recycling	22	0.496627	1.45789	0.0487474	0.59749	0.576867
GO:0035303	regulation of dephosphorylation	178	0.322115	1.27818	0.0493307	0.601416	0.580658
GO:0048009	insulin-like growth factor receptor signaling pathway	31	0.455026	1.43602	0.0494985	0.601416	0.580658
GO:0050774	negative regulation of dendrite morphogenesis	14	0.558495	1.47165	0.049554	0.601416	0.580658
GO:0018195	peptidyl-arginine modification	25	0.479967	1.44904	0.0496943	0.601416	0.580658
GO:0006750	glutathione biosynthetic process	13	0.569769	1.47257	0.049763	0.601416	0.580658
GO:0030214	hyaluronan catabolic process	15	0.548169	1.46944	0.0497808	0.601416	0.580658
GO:0033572	transferrin transport	32	0.451381	1.43336	0.0497909	0.601416	0.580658
GO:1903170	negative regulation of calcium ion transmembrane transport	36	0.438518	1.42371	0.0500087	0.601881	0.581107
GO:0032075	positive regulation of nuclease activity	15	-0.458463	-1.51298	0.0500362	0.601881	0.581107
GO:0006220	pyrimidine nucleotide metabolic process	41	0.424873	1.41238	0.0502979	0.602705	0.581902
GO:0014013	regulation of gliogenesis	96	0.356096	1.33763	0.0503511	0.602705	0.581902
GO:0055075	potassium ion homeostasis	25	0.479263	1.44691	0.0505228	0.602705	0.581902
GO:0032413	negative regulation of ion transmembrane transporter activity	63	0.386583	1.37608	0.0506253	0.602705	0.581902
GO:0045019	negative regulation of nitric oxide biosynthetic process	12	-0.501138	-1.53528	0.0507257	0.602705	0.581902
GO:1904406	negative regulation of nitric oxide metabolic process	12	-0.501138	-1.53528	0.0507257	0.602705	0.581902
GO:0003085	negative regulation of systemic arterial blood pressure	12	0.580992	1.47056	0.0509204	0.603785	0.582945
GO:0007416	synapse assembly	134	0.335728	1.30341	0.0512652	0.606447	0.585516
GO:0010770	positive regulation of cell morphogenesis involved in differentiation	128	0.338219	1.30777	0.0513532	0.606447	0.585516
GO:2000786	positive regulation of autophagosome assembly	10	0.609104	1.46712	0.0515843	0.607943	0.586959
GO:0007015	actin filament organization	338	0.295745	1.21248	0.0518949	0.610368	0.589301
GO:0090276	regulation of peptide hormone secretion	183	0.319722	1.27103	0.0521825	0.612513	0.591372
GO:0060047	heart contraction	237	0.308626	1.24563	0.0523648	0.613416	0.592244
GO:1904994	regulation of leukocyte adhesion to vascular endothelial cell	11	-0.517297	-1.53792	0.0525701	0.614585	0.593373
GO:0070193	synaptonemal complex organization	15	-0.455239	-1.50234	0.0527947	0.615974	0.594713
GO:0006487	protein N-linked glycosylation	81	0.365894	1.3472	0.0534906	0.621359	0.599913
GO:0003015	heart process	240	0.307682	1.24269	0.0535426	0.621359	0.599913
GO:0016578	histone deubiquitination	18	0.518647	1.45378	0.0536969	0.621359	0.599913
GO:0001503	ossification	324	0.296591	1.21401	0.0539272	0.621359	0.599913
GO:0001508	action potential	122	0.339833	1.30823	0.0539458	0.621359	0.599913
GO:1905521	regulation of macrophage migration	17	0.526419	1.45517	0.0539836	0.621359	0.599913
GO:0032119	sequestering of zinc ion	11	0.591252	1.46213	0.0540034	0.621359	0.599913
GO:0006029	proteoglycan metabolic process	78	0.368264	1.34955	0.0542503	0.622969	0.601467
GO:0039692	single stranded viral RNA replication via double stranded DNA intermediate	10	-0.53534	-1.5398	0.0545485	0.62516	0.603583
GO:0007368	determination of left/right symmetry	101	0.350724	1.32485	0.0546655	0.62527	0.603689
GO:0007431	salivary gland development	34	0.440695	1.41562	0.0550703	0.628665	0.606967
GO:0006721	terpenoid metabolic process	86	0.361	1.33905	0.0552122	0.629051	0.60734
GO:0010001	glial cell differentiation	183	0.318414	1.26583	0.0556769	0.633107	0.611256
GO:0019080	viral gene expression	172	0.321215	1.27164	0.0558128	0.633415	0.611553
GO:0009612	response to mechanical stimulus	183	0.318229	1.26509	0.0561584	0.634488	0.612589
GO:0048713	regulation of oligodendrocyte differentiation	34	0.439831	1.41285	0.0563026	0.634488	0.612589
GO:0035304	regulation of protein dephosphorylation	110	0.344654	1.31358	0.0564199	0.634488	0.612589
GO:0140131	positive regulation of lymphocyte chemotaxis	12	0.575531	1.45674	0.0564453	0.634488	0.612589
GO:0030433	ubiquitin-dependent ERAD pathway	63	-0.271589	-1.30552	0.0564564	0.634488	0.612589
GO:0008654	phospholipid biosynthetic process	252	0.304776	1.23402	0.0566684	0.634488	0.612589
GO:0045651	positive regulation of macrophage differentiation	12	0.575205	1.45591	0.0567715	0.634488	0.612589
GO:0032434	regulation of proteasomal ubiquitin-dependent protein catabolic process	111	0.343891	1.3119	0.0568806	0.634488	0.612589
GO:0040019	positive regulation of embryonic development	29	0.4568	1.42231	0.0568881	0.634488	0.612589
GO:0061982	meiosis I cell cycle process	89	-0.245546	-1.26048	0.0572515	0.636122	0.614166
GO:0070509	calcium ion import	66	-0.267447	-1.29774	0.0573304	0.636122	0.614166
GO:0099003	vesicle-mediated transport in synapse	125	0.336912	1.29986	0.0574247	0.636122	0.614166
GO:0010523	negative regulation of calcium ion transport into cytosol	16	0.53166	1.44818	0.0574717	0.636122	0.614166
GO:0002762	negative regulation of myeloid leukocyte differentiation	41	0.419797	1.39551	0.0576709	0.637116	0.615125
GO:0043624	cellular protein complex disassembly	192	0.315431	1.25785	0.0578074	0.637415	0.615414
GO:0035458	cellular response to interferon-beta	10	-0.530873	-1.52696	0.0579864	0.638179	0.616152
GO:0046394	carboxylic acid biosynthetic process	350	0.292763	1.20179	0.0583643	0.640056	0.617964
GO:0044262	cellular carbohydrate metabolic process	224	0.308874	1.24291	0.0583768	0.640056	0.617964
GO:0006677	glycosylceramide metabolic process	15	-0.449113	-1.48212	0.0586654	0.641523	0.619381
GO:0016053	organic acid biosynthetic process	351	0.292585	1.20119	0.0587882	0.641523	0.619381
GO:0045806	negative regulation of endocytosis	46	0.408394	1.38476	0.0588412	0.641523	0.619381
GO:0043462	regulation of ATPase activity	70	0.373651	1.34988	0.0590209	0.64228	0.620112
GO:0031952	regulation of protein autophosphorylation	38	0.426257	1.39787	0.0592947	0.643914	0.621689
GO:0030148	sphingolipid biosynthetic process	83	0.361138	1.33381	0.0593922	0.643914	0.621689
GO:0071731	response to nitric oxide	17	0.521354	1.44117	0.0596706	0.644749	0.622496
GO:0030322	stabilization of membrane potential	14	0.548834	1.44619	0.0597791	0.644749	0.622496
GO:0072488	ammonium transmembrane transport	13	0.560046	1.44744	0.0598858	0.644749	0.622496
GO:0007626	locomotory behavior	163	0.322251	1.27085	0.0599123	0.644749	0.622496
GO:2000058	regulation of ubiquitin-dependent protein catabolic process	130	0.333625	1.2918	0.0601101	0.645685	0.623399
GO:0050779	RNA destabilization	24	-0.373135	-1.41755	0.0607015	0.650836	0.628373
GO:0044088	regulation of vacuole organization	39	0.422437	1.39168	0.0611046	0.653954	0.631382
GO:0051668	localization within membrane	106	0.344737	1.309	0.0612576	0.654389	0.631803
GO:0060326	cell chemotaxis	208	0.31092	1.24593	0.0614783	0.654583	0.63199
GO:0051155	positive regulation of striated muscle cell differentiation	53	0.394148	1.36713	0.0617717	0.654583	0.63199
GO:0070873	regulation of glycogen metabolic process	25	0.470413	1.4202	0.061794	0.654583	0.63199
GO:0044342	type B pancreatic cell proliferation	15	-0.445869	-1.47141	0.0618638	0.654583	0.63199
GO:0042274	ribosomal small subunit biogenesis	67	0.375381	1.34798	0.0621086	0.654583	0.63199
GO:0031643	positive regulation of myelination	11	0.58357	1.44314	0.0621733	0.654583	0.63199
GO:0042063	gliogenesis	236	0.305628	1.23325	0.0623488	0.654583	0.63199
GO:0090174	organelle membrane fusion	137	0.329928	1.28334	0.062355	0.654583	0.63199
GO:0036465	synaptic vesicle recycling	47	0.404289	1.3756	0.0623664	0.654583	0.63199
GO:0032231	regulation of actin filament bundle assembly	79	0.363178	1.33311	0.0624852	0.654583	0.63199
GO:0005513	detection of calcium ion	12	0.569898	1.44248	0.0625126	0.654583	0.63199
GO:0035020	regulation of Rac protein signal transduction	16	0.526534	1.43422	0.0635489	0.663145	0.640256
GO:0044788	modulation by host of viral process	22	0.48449	1.42226	0.0636051	0.663145	0.640256
GO:0048488	synaptic vesicle endocytosis	37	0.426039	1.39034	0.0638364	0.663145	0.640256
GO:0022612	gland morphogenesis	102	0.345921	1.3081	0.0639251	0.663145	0.640256
GO:0044794	positive regulation by host of viral process	13	0.555953	1.43687	0.0645083	0.663145	0.640256
GO:0006577	amino-acid betaine metabolic process	16	0.525696	1.43194	0.0645408	0.663145	0.640256
GO:0050773	regulation of dendrite development	120	0.336206	1.29227	0.0647565	0.663145	0.640256
GO:0022604	regulation of cell morphogenesis	422	0.285609	1.17974	0.0647772	0.663145	0.640256
GO:0014812	muscle cell migration	75	0.365541	1.3328	0.0651394	0.663145	0.640256
GO:0035929	steroid hormone secretion	18	0.509193	1.42728	0.0652199	0.663145	0.640256
GO:0000028	ribosomal small subunit assembly	16	0.525115	1.43035	0.0652929	0.663145	0.640256
GO:2000637	positive regulation of gene silencing by miRNA	21	-0.388711	-1.42141	0.0652937	0.663145	0.640256
GO:0008211	glucocorticoid metabolic process	21	0.488616	1.41946	0.0657874	0.663145	0.640256
GO:0071480	cellular response to gamma radiation	27	-0.35359	-1.38759	0.0660466	0.663145	0.640256
GO:0007212	dopamine receptor signaling pathway	42	0.412239	1.37631	0.0661825	0.663145	0.640256
GO:0044839	cell cycle G2/M phase transition	228	0.305754	1.23154	0.0663457	0.663145	0.640256
GO:0002836	positive regulation of response to tumor cell	10	0.594667	1.43235	0.0663775	0.663145	0.640256
GO:0002839	positive regulation of immune response to tumor cell	10	0.594667	1.43235	0.0663775	0.663145	0.640256
GO:0001783	B cell apoptotic process	22	0.482341	1.41595	0.0665051	0.663145	0.640256
GO:0006901	vesicle coating	63	0.377669	1.34435	0.0668181	0.663145	0.640256
GO:0003205	cardiac chamber development	144	0.325711	1.2721	0.0668459	0.663145	0.640256
GO:0061387	regulation of extent of cell growth	95	0.348972	1.30935	0.0669659	0.663145	0.640256
GO:0016101	diterpenoid metabolic process	79	0.36104	1.32527	0.067148	0.663145	0.640256
GO:0070167	regulation of biomineral tissue development	62	0.378618	1.34453	0.067345	0.663145	0.640256
GO:0043650	dicarboxylic acid biosynthetic process	11	0.57888	1.43154	0.0675503	0.663145	0.640256
GO:0098742	cell-cell adhesion via plasma-membrane adhesion molecules	199	0.310844	1.24236	0.0675751	0.663145	0.640256
GO:0045132	meiotic chromosome segregation	67	-0.262119	-1.27599	0.0679499	0.663145	0.640256
GO:2000310	regulation of NMDA receptor activity	18	0.507073	1.42133	0.0679777	0.663145	0.640256
GO:0018210	peptidyl-threonine modification	125	0.332605	1.28324	0.0681693	0.663145	0.640256
GO:0048268	clathrin coat assembly	18	0.506928	1.42093	0.0681713	0.663145	0.640256
GO:0060216	definitive hemopoiesis	19	0.499819	1.41896	0.068242	0.663145	0.640256
GO:0016241	regulation of macroautophagy	149	0.323618	1.26748	0.0682449	0.663145	0.640256
GO:0003279	cardiac septum development	91	0.351259	1.31148	0.0682733	0.663145	0.640256
GO:0030813	positive regulation of nucleotide catabolic process	18	0.506666	1.42019	0.0684849	0.663145	0.640256
GO:0043410	positive regulation of MAPK cascade	460	0.28247	1.16978	0.0684903	0.663145	0.640256
GO:0050690	regulation of defense response to virus by virus	29	0.448721	1.39715	0.0685429	0.663145	0.640256
GO:0051650	establishment of vesicle localization	227	0.305277	1.22934	0.0685914	0.663145	0.640256
GO:0044282	small molecule catabolic process	366	0.288884	1.18777	0.0687325	0.663145	0.640256
GO:0032885	regulation of polysaccharide biosynthetic process	28	0.452462	1.39908	0.0687487	0.663145	0.640256
GO:0016197	endosomal transport	172	0.31668	1.25369	0.0689106	0.663145	0.640256
GO:0010769	regulation of cell morphogenesis involved in differentiation	252	0.301205	1.21956	0.0689645	0.663145	0.640256
GO:0018216	peptidyl-arginine methylation	15	0.531297	1.42421	0.0689705	0.663145	0.640256
GO:0043542	endothelial cell migration	168	0.317727	1.25574	0.068981	0.663145	0.640256
GO:0006612	protein targeting to membrane	159	0.320325	1.26078	0.069034	0.663145	0.640256
GO:0006575	cellular modified amino acid metabolic process	155	0.321453	1.26282	0.0691711	0.663145	0.640256
GO:0007632	visual behavior	45	0.404259	1.3657	0.0691883	0.663145	0.640256
GO:0031115	negative regulation of microtubule polymerization	11	0.577239	1.42748	0.0694539	0.663145	0.640256
GO:0034113	heterotypic cell-cell adhesion	37	0.422587	1.37908	0.0695017	0.663145	0.640256
GO:0050678	regulation of epithelial cell proliferation	274	0.298096	1.21167	0.0695033	0.663145	0.640256
GO:0009101	glycoprotein biosynthetic process	294	0.295642	1.20544	0.0695911	0.663145	0.640256
GO:0015936	coenzyme A metabolic process	15	-0.438556	-1.44728	0.0696338	0.663145	0.640256
GO:0060746	parental behavior	12	0.563893	1.42728	0.0697015	0.663145	0.640256
GO:0010212	response to ionizing radiation	138	-0.21753	-1.19788	0.0697177	0.663145	0.640256
GO:0055067	monovalent inorganic cation homeostasis	139	0.326503	1.27146	0.0697916	0.663145	0.640256
GO:1901880	negative regulation of protein depolymerization	56	0.385364	1.34805	0.0700215	0.663145	0.640256
GO:0030207	chondroitin sulfate catabolic process	13	0.551363	1.425	0.0700799	0.663145	0.640256
GO:0030865	cortical cytoskeleton organization	45	0.403778	1.36407	0.0701223	0.663145	0.640256
GO:0038179	neurotrophin signaling pathway	36	0.424887	1.37946	0.0703111	0.663145	0.640256
GO:0043525	positive regulation of neuron apoptotic process	45	0.403541	1.36327	0.0705817	0.663145	0.640256
GO:0006362	transcription elongation from RNA polymerase I promoter	24	0.468841	1.40306	0.0706217	0.663145	0.640256
GO:0090316	positive regulation of intracellular protein transport	176	0.315131	1.24947	0.0706468	0.663145	0.640256
GO:2000831	regulation of steroid hormone secretion	16	0.520836	1.4187	0.0707714	0.663145	0.640256
GO:0045017	glycerolipid biosynthetic process	239	0.302659	1.22213	0.0708753	0.663145	0.640256
GO:0060042	retina morphogenesis in camera-type eye	43	0.407407	1.36561	0.070876	0.663145	0.640256
GO:0051961	negative regulation of nervous system development	259	0.29972	1.21515	0.0709248	0.663145	0.640256
GO:0072527	pyrimidine-containing compound metabolic process	70	0.367811	1.32878	0.0709285	0.663145	0.640256
GO:0002903	negative regulation of B cell apoptotic process	11	0.575972	1.42435	0.0709617	0.663145	0.640256
GO:1903510	mucopolysaccharide metabolic process	103	0.342311	1.29585	0.0712832	0.665081	0.642126
GO:0032781	positive regulation of ATPase activity	50	0.394073	1.35433	0.0714339	0.665421	0.642454
GO:0050855	regulation of B cell receptor signaling pathway	18	0.504346	1.41369	0.0715847	0.665604	0.64263
GO:0019098	reproductive behavior	26	0.458981	1.39724	0.0716822	0.665604	0.64263
GO:0051194	positive regulation of cofactor metabolic process	19	0.496667	1.41	0.072562	0.670107	0.646978
GO:0006359	regulation of transcription by RNA polymerase III	23	0.472773	1.40163	0.0726345	0.670107	0.646978
GO:0007094	mitotic spindle assembly checkpoint	28	0.449844	1.39099	0.0727426	0.670107	0.646978
GO:0071173	spindle assembly checkpoint	28	0.449844	1.39099	0.0727426	0.670107	0.646978
GO:0071174	mitotic spindle checkpoint	28	0.449844	1.39099	0.0727426	0.670107	0.646978
GO:1904837	beta-catenin-TCF complex assembly	38	-0.310305	-1.33084	0.073084	0.670402	0.647263
GO:0070126	mitochondrial translational termination	82	0.355735	1.31194	0.0732683	0.670402	0.647263
GO:0030497	fatty acid elongation	10	0.58878	1.41817	0.0733343	0.670402	0.647263
GO:0042761	very long-chain fatty acid biosynthetic process	10	0.58878	1.41817	0.0733343	0.670402	0.647263
GO:0060122	inner ear receptor cell stereocilium organization	27	0.453549	1.39164	0.0733505	0.670402	0.647263
GO:0006376	mRNA splice site selection	28	-0.344792	-1.3666	0.0735252	0.670946	0.647788
GO:1904293	negative regulation of ERAD pathway	13	-0.460071	-1.44838	0.0738446	0.672155	0.648955
GO:0034763	negative regulation of transmembrane transport	100	0.343065	1.29452	0.0738885	0.672155	0.648955
GO:0050775	positive regulation of dendrite morphogenesis	28	0.448753	1.38761	0.0744937	0.675952	0.652621
GO:0002862	negative regulation of inflammatory response to antigenic stimulus	10	0.58777	1.41573	0.0746093	0.675952	0.652621
GO:0045778	positive regulation of ossification	72	0.364065	1.32024	0.0746543	0.675952	0.652621
GO:0048168	regulation of neuronal synaptic plasticity	48	0.395648	1.3509	0.074826	0.676167	0.652829
GO:0035272	exocrine system development	43	0.405255	1.3584	0.0749103	0.676167	0.652829
GO:0045006	DNA deamination	10	-0.51075	-1.46907	0.0754281	0.678221	0.654812
GO:0060998	regulation of dendritic spine development	62	0.374639	1.3304	0.0755921	0.678221	0.654812
GO:1903827	regulation of cellular protein localization	461	0.281036	1.16391	0.0756171	0.678221	0.654812
GO:0090162	establishment of epithelial cell polarity	25	0.460756	1.39104	0.0758257	0.678221	0.654812
GO:0045987	positive regulation of smooth muscle contraction	33	-0.3239	-1.34127	0.076056	0.678221	0.654812
GO:0050432	catecholamine secretion	43	0.404592	1.35618	0.0761053	0.678221	0.654812
GO:0032594	protein transport within lipid bilayer	26	0.456129	1.38856	0.0761097	0.678221	0.654812
GO:0048243	norepinephrine secretion	15	0.525776	1.40941	0.0761353	0.678221	0.654812
GO:0016239	positive regulation of macroautophagy	55	0.383726	1.33866	0.0762574	0.678221	0.654812
GO:0032388	positive regulation of intracellular transport	218	0.304687	1.2242	0.0763028	0.678221	0.654812
GO:0019079	viral genome replication	104	-0.230796	-1.21721	0.0765248	0.679077	0.655638
GO:0006720	isoprenoid metabolic process	103	0.340211	1.2879	0.076845	0.679077	0.655638
GO:0072224	metanephric glomerulus development	12	-0.472759	-1.44834	0.0768506	0.679077	0.655638
GO:1905564	positive regulation of vascular endothelial cell proliferation	13	0.546257	1.4118	0.0768656	0.679077	0.655638
GO:0014065	phosphatidylinositol 3-kinase signaling	115	0.33387	1.27809	0.0771714	0.679358	0.65591
GO:2000785	regulation of autophagosome assembly	35	0.423684	1.36847	0.077244	0.679358	0.65591
GO:0006067	ethanol metabolic process	14	0.534756	1.4091	0.0772475	0.679358	0.65591
GO:1904951	positive regulation of establishment of protein localization	405	0.284044	1.17178	0.0777076	0.681283	0.657768
GO:0032891	negative regulation of organic acid transport	16	0.515542	1.40428	0.0778628	0.681283	0.657768
GO:0018146	keratan sulfate biosynthetic process	24	0.464033	1.38867	0.0780086	0.681283	0.657768
GO:0045109	intermediate filament organization	18	0.499727	1.40074	0.0782076	0.681283	0.657768
GO:0006066	alcohol metabolic process	274	0.295925	1.20285	0.0782389	0.681283	0.657768
GO:0051492	regulation of stress fiber assembly	68	0.366496	1.31873	0.0786585	0.681283	0.657768
GO:0072528	pyrimidine-containing compound biosynthetic process	37	0.417327	1.36191	0.0787886	0.681283	0.657768
GO:0032925	regulation of activin receptor signaling pathway	19	0.492345	1.39774	0.0789511	0.681283	0.657768
GO:1902894	negative regulation of pri-miRNA transcription by RNA polymerase II	10	0.5842	1.40714	0.0790244	0.681283	0.657768
GO:0002576	platelet degranulation	107	0.337207	1.2817	0.0790784	0.681283	0.657768
GO:0003231	cardiac ventricle development	113	0.334103	1.27678	0.0791704	0.681283	0.657768
GO:0042596	fear response	34	0.425483	1.36676	0.079207	0.681283	0.657768
GO:0015988	energy coupled proton transmembrane transport, against electrochemical gradient	26	0.454122	1.38245	0.0792889	0.681283	0.657768
GO:0015991	ATP hydrolysis coupled proton transport	26	0.454122	1.38245	0.0792889	0.681283	0.657768
GO:0032480	negative regulation of type I interferon production	44	0.40073	1.34852	0.0796165	0.681283	0.657768
GO:0051443	positive regulation of ubiquitin-protein transferase activity	24	0.462849	1.38513	0.0798183	0.681283	0.657768
GO:0030203	glycosaminoglycan metabolic process	137	0.323866	1.25976	0.0798961	0.681283	0.657768
GO:0007567	parturition	14	0.532797	1.40393	0.0799947	0.681283	0.657768
GO:0000183	chromatin silencing at rDNA	31	0.434281	1.37056	0.0801945	0.681283	0.657768
GO:0031577	spindle checkpoint	29	0.441414	1.3744	0.0803581	0.681283	0.657768
GO:0006826	iron ion transport	54	0.383163	1.33302	0.0803665	0.681283	0.657768
GO:0044818	mitotic G2/M transition checkpoint	25	0.457833	1.38222	0.0804575	0.681283	0.657768
GO:0038180	nerve growth factor signaling pathway	12	0.5551	1.40503	0.0807363	0.681283	0.657768
GO:0043534	blood vessel endothelial cell migration	101	0.339958	1.28418	0.0807715	0.681283	0.657768
GO:0021681	cerebellar granular layer development	12	0.554755	1.40415	0.081223	0.681283	0.657768
GO:0032228	regulation of synaptic transmission, GABAergic	28	0.44473	1.37517	0.0813112	0.681283	0.657768
GO:0007026	negative regulation of microtubule depolymerization	21	0.47798	1.38857	0.0813738	0.681283	0.657768
GO:0050667	homocysteine metabolic process	13	-0.453348	-1.42722	0.0814208	0.681283	0.657768
GO:0050806	positive regulation of synaptic transmission	139	0.322657	1.25648	0.0815368	0.681283	0.657768
GO:0010959	regulation of metal ion transport	313	0.290743	1.18851	0.0815716	0.681283	0.657768
GO:0032868	response to insulin	231	0.301106	1.21369	0.0817762	0.681283	0.657768
GO:0014904	myotube cell development	32	0.430135	1.36589	0.0818138	0.681283	0.657768
GO:0035282	segmentation	75	0.358222	1.30612	0.0818605	0.681283	0.657768
GO:0070979	protein K11-linked ubiquitination	24	0.461524	1.38116	0.0819441	0.681283	0.657768
GO:0048814	regulation of dendrite morphogenesis	75	0.358145	1.30583	0.0820531	0.681283	0.657768
GO:0002369	T cell cytokine production	26	-0.348667	-1.35433	0.0821215	0.681283	0.657768
GO:0032271	regulation of protein polymerization	183	0.310111	1.23282	0.0821432	0.681283	0.657768
GO:0001837	epithelial to mesenchymal transition	123	0.328566	1.26577	0.0822395	0.681283	0.657768
GO:0007163	establishment or maintenance of cell polarity	186	0.309333	1.23105	0.0824015	0.681283	0.657768
GO:0090662	ATP hydrolysis coupled transmembrane transport	27	0.44801	1.37464	0.082524	0.681283	0.657768
GO:0099131	ATP hydrolysis coupled ion transmembrane transport	27	0.44801	1.37464	0.082524	0.681283	0.657768
GO:0000422	autophagy of mitochondrion	76	0.357062	1.30404	0.0825541	0.681283	0.657768
GO:0061726	mitochondrion disassembly	76	0.357062	1.30404	0.0825541	0.681283	0.657768
GO:0045141	meiotic telomere clustering	10	-0.503609	-1.44853	0.0829717	0.681283	0.657768
GO:0002830	positive regulation of type 2 immune response	12	-0.46659	-1.42944	0.0835823	0.681283	0.657768
GO:0044319	wound healing, spreading of cells	27	0.447323	1.37253	0.0836853	0.681283	0.657768
GO:0090505	epiboly involved in wound healing	27	0.447323	1.37253	0.0836853	0.681283	0.657768
GO:0043619	regulation of transcription from RNA polymerase II promoter in response to oxidative stress	10	0.580639	1.39856	0.0836873	0.681283	0.657768
GO:0032645	regulation of granulocyte macrophage colony-stimulating factor production	10	-0.502723	-1.44599	0.0837601	0.681283	0.657768
GO:0006684	sphingomyelin metabolic process	14	0.530016	1.39661	0.0838896	0.681283	0.657768
GO:0010499	proteasomal ubiquitin-independent protein catabolic process	17	0.503356	1.39142	0.0838949	0.681283	0.657768
GO:0045765	regulation of angiogenesis	250	0.297688	1.20485	0.0840869	0.681283	0.657768
GO:0009219	pyrimidine deoxyribonucleotide metabolic process	17	0.50318	1.39093	0.0841343	0.681283	0.657768
GO:0090504	epiboly	28	0.44305	1.36998	0.0841458	0.681283	0.657768
GO:0006144	purine nucleobase metabolic process	21	0.476178	1.38333	0.0843134	0.681283	0.657768
GO:0052652	cyclic purine nucleotide metabolic process	85	0.348987	1.2927	0.0845428	0.681283	0.657768
GO:1990173	protein localization to nucleoplasm	10	0.579999	1.39702	0.0845462	0.681283	0.657768
GO:0071902	positive regulation of protein serine/threonine kinase activity	312	0.290216	1.18621	0.0845517	0.681283	0.657768
GO:0021542	dentate gyrus development	15	0.519744	1.39324	0.0845753	0.681283	0.657768
GO:1904754	positive regulation of vascular associated smooth muscle cell migration	13	0.540536	1.39702	0.0847107	0.681283	0.657768
GO:0030038	contractile actin filament bundle assembly	79	0.353653	1.29815	0.0847409	0.681283	0.657768
GO:0043149	stress fiber assembly	79	0.353653	1.29815	0.0847409	0.681283	0.657768
GO:2000404	regulation of T cell migration	28	-0.338177	-1.34038	0.0850213	0.681283	0.657768
GO:0051495	positive regulation of cytoskeleton organization	189	0.30798	1.22698	0.0851502	0.681283	0.657768
GO:0042060	wound healing	454	0.279681	1.15778	0.0851615	0.681283	0.657768
GO:0035640	exploration behavior	22	0.469851	1.37929	0.0852718	0.681283	0.657768
GO:0043649	dicarboxylic acid catabolic process	17	0.502279	1.38844	0.0855066	0.681283	0.657768
GO:0060148	positive regulation of posttranscriptional gene silencing	22	-0.368247	-1.36498	0.0855154	0.681283	0.657768
GO:1901992	positive regulation of mitotic cell cycle phase transition	62	0.370045	1.31408	0.0858324	0.681283	0.657768
GO:0005977	glycogen metabolic process	59	0.373851	1.31811	0.0858917	0.681283	0.657768
GO:0006073	cellular glucan metabolic process	59	0.373851	1.31811	0.0858917	0.681283	0.657768
GO:0044042	glucan metabolic process	59	0.373851	1.31811	0.0858917	0.681283	0.657768
GO:1903363	negative regulation of cellular protein catabolic process	66	0.365475	1.30966	0.0860582	0.681674	0.658146
GO:0061298	retina vasculature development in camera-type eye	14	0.528359	1.39224	0.0863463	0.681827	0.658293
GO:0016052	carbohydrate catabolic process	153	0.316686	1.24284	0.0863609	0.681827	0.658293
GO:0030817	regulation of cAMP biosynthetic process	46	0.393568	1.33449	0.0864767	0.681827	0.658293
GO:0061430	bone trabecula morphogenesis	12	0.550998	1.39464	0.0865847	0.681827	0.658293
GO:0031338	regulation of vesicle fusion	57	0.376185	1.31958	0.0866629	0.681827	0.658293
GO:0048762	mesenchymal cell differentiation	184	0.308637	1.22741	0.08696	0.68324	0.659658
GO:0044827	modulation by host of viral genome replication	13	0.538737	1.39237	0.0872616	0.684686	0.661054
GO:0051222	positive regulation of protein transport	374	0.28433	1.16994	0.0875701	0.685207	0.661557
GO:0050731	positive regulation of peptidyl-tyrosine phosphorylation	148	0.317872	1.24427	0.0876413	0.685207	0.661557
GO:0001824	blastocyst development	55	0.378474	1.32034	0.0876811	0.685207	0.661557
GO:0060999	positive regulation of dendritic spine development	37	0.412579	1.34642	0.0878716	0.685601	0.661938
GO:0051149	positive regulation of muscle cell differentiation	81	0.350824	1.29172	0.087967	0.685601	0.661938
GO:0034198	cellular response to amino acid starvation	37	0.412326	1.34559	0.0883999	0.68567	0.662004
GO:0097529	myeloid leukocyte migration	128	0.324639	1.25526	0.0884243	0.68567	0.662004
GO:0019083	viral transcription	159	0.314414	1.23751	0.088548	0.68567	0.662004
GO:0070200	establishment of protein localization to telomere	14	0.526881	1.38835	0.0885723	0.68567	0.662004
GO:0051261	protein depolymerization	94	0.341337	1.27914	0.0886892	0.68567	0.662004
GO:0044057	regulation of system process	446	0.279472	1.15629	0.0888198	0.68567	0.662004
GO:0031657	regulation of cyclin-dependent protein serine/threonine kinase activity involved in G1/S transition of mitotic cell cycle	14	0.526668	1.38778	0.0889082	0.68567	0.662004
GO:0048148	behavioral response to cocaine	17	0.499959	1.38203	0.0891189	0.68567	0.662004
GO:0017014	protein nitrosylation	13	0.537405	1.38893	0.0891919	0.68567	0.662004
GO:0018119	peptidyl-cysteine S-nitrosylation	13	0.537405	1.38893	0.0891919	0.68567	0.662004
GO:0045844	positive regulation of striated muscle tissue development	60	0.370985	1.31124	0.0894738	0.68567	0.662004
GO:0048636	positive regulation of muscle organ development	60	0.370985	1.31124	0.0894738	0.68567	0.662004
GO:0006022	aminoglycan metabolic process	149	0.317012	1.2416	0.089545	0.68567	0.662004
GO:0034315	regulation of Arp2/3 complex-mediated actin nucleation	15	0.516383	1.38423	0.0897394	0.68567	0.662004
GO:0002052	positive regulation of neuroblast proliferation	16	0.507457	1.38226	0.0897997	0.68567	0.662004
GO:0046434	organophosphate catabolic process	191	0.306278	1.22098	0.0900706	0.68567	0.662004
GO:1901863	positive regulation of muscle tissue development	61	0.369384	1.30865	0.0903427	0.68567	0.662004
GO:0032530	regulation of microvillus organization	12	0.548187	1.38753	0.0905136	0.68567	0.662004
GO:0055083	monovalent inorganic anion homeostasis	19	0.484884	1.37656	0.0905622	0.68567	0.662004
GO:0060761	negative regulation of response to cytokine stimulus	51	0.383162	1.32092	0.0907118	0.68567	0.662004
GO:0051131	chaperone-mediated protein complex assembly	17	0.49891	1.37913	0.0907188	0.68567	0.662004
GO:1902224	ketone body metabolic process	10	0.575531	1.38625	0.090729	0.68567	0.662004
GO:0010766	negative regulation of sodium ion transport	15	0.515675	1.38233	0.0908084	0.68567	0.662004
GO:1990000	amyloid fibril formation	15	0.515579	1.38208	0.0909353	0.68567	0.662004
GO:0101023	vascular endothelial cell proliferation	18	0.491342	1.37724	0.0910379	0.68567	0.662004
GO:1905562	regulation of vascular endothelial cell proliferation	18	0.491342	1.37724	0.0910379	0.68567	0.662004
GO:0003352	regulation of cilium movement	12	-0.460138	-1.40968	0.0914258	0.687364	0.66364
GO:0030501	positive regulation of bone mineralization	28	0.439026	1.35753	0.091499	0.687364	0.66364
GO:2000273	positive regulation of signaling receptor activity	28	0.438934	1.35725	0.0916967	0.687962	0.664217
GO:1901020	negative regulation of calcium ion transmembrane transporter activity	33	0.421652	1.34691	0.0921193	0.688114	0.664364
GO:0021700	developmental maturation	218	0.300791	1.20855	0.092168	0.688114	0.664364
GO:0001938	positive regulation of endothelial cell proliferation	76	0.353397	1.29065	0.0922113	0.688114	0.664364
GO:0018242	protein O-linked glycosylation via serine	15	0.514663	1.37962	0.0923717	0.688114	0.664364
GO:0001935	endothelial cell proliferation	116	0.328384	1.25815	0.0924065	0.688114	0.664364
GO:0045646	regulation of erythrocyte differentiation	43	0.396574	1.3293	0.0926362	0.688114	0.664364
GO:0015918	sterol transport	76	0.353211	1.28997	0.0926622	0.688114	0.664364
GO:1905209	positive regulation of cardiocyte differentiation	23	0.46022	1.36441	0.0926626	0.688114	0.664364
GO:0010765	positive regulation of sodium ion transport	30	0.430967	1.35115	0.0927983	0.688244	0.664489
GO:0006334	nucleosome assembly	109	0.331513	1.26233	0.0930311	0.688329	0.664571
GO:0051101	regulation of DNA binding	105	0.33353	1.26517	0.0930779	0.688329	0.664571
GO:0051589	negative regulation of neurotransmitter transport	18	0.489861	1.37309	0.0934176	0.688329	0.664571
GO:0030225	macrophage differentiation	35	0.415275	1.34131	0.0935491	0.688329	0.664571
GO:0051851	modification by host of symbiont morphology or physiology	61	0.368089	1.30406	0.0935507	0.688329	0.664571
GO:0099504	synaptic vesicle cycle	120	0.326311	1.25424	0.0936541	0.688329	0.664571
GO:0009437	carnitine metabolic process	13	0.534417	1.3812	0.093723	0.688329	0.664571
GO:1900180	regulation of protein localization to nucleus	94	0.339575	1.27253	0.0939028	0.688329	0.664571
GO:0072520	seminiferous tubule development	10	-0.4938	-1.42032	0.0939176	0.688329	0.664571
GO:0050772	positive regulation of axonogenesis	80	0.349415	1.28463	0.093992	0.688329	0.664571
GO:0050680	negative regulation of epithelial cell proliferation	112	0.32948	1.25805	0.0949783	0.692597	0.668692
GO:0097479	synaptic vesicle localization	114	0.328495	1.25647	0.0950173	0.692597	0.668692
GO:0006458	'de novo' protein folding	47	0.388023	1.32025	0.0950478	0.692597	0.668692
GO:0051702	interaction with symbiont	65	0.36299	1.29801	0.0950507	0.692597	0.668692
GO:0034656	nucleobase-containing small molecule catabolic process	42	0.397364	1.32665	0.095373	0.694077	0.67012
GO:0009190	cyclic nucleotide biosynthetic process	86	0.344308	1.27714	0.0955637	0.694597	0.670622
GO:1900120	regulation of receptor binding	22	0.463716	1.36128	0.0957385	0.694999	0.671011
GO:0045444	fat cell differentiation	180	0.30714	1.21968	0.0961767	0.695409	0.671407
GO:0030866	cortical actin cytoskeleton organization	35	0.41398	1.33713	0.0962371	0.695409	0.671407
GO:0016054	organic acid catabolic process	230	0.297893	1.20042	0.096355	0.695409	0.671407
GO:0046395	carboxylic acid catabolic process	230	0.297893	1.20042	0.096355	0.695409	0.671407
GO:0030802	regulation of cyclic nucleotide biosynthetic process	64	0.363579	1.29717	0.0963922	0.695409	0.671407
GO:0070588	calcium ion transmembrane transport	269	0.292517	1.18803	0.096614	0.696147	0.672119
GO:0030799	regulation of cyclic nucleotide metabolic process	86	0.343887	1.27558	0.0967788	0.696473	0.672434
GO:0050818	regulation of coagulation	64	0.363347	1.29634	0.0970051	0.697239	0.673174
GO:0032233	positive regulation of actin filament bundle assembly	52	0.378936	1.31037	0.0972052	0.697495	0.673421
GO:0006814	sodium ion transport	191	0.304506	1.21391	0.0974867	0.697495	0.673421
GO:0005980	glycogen catabolic process	19	0.480551	1.36425	0.0976253	0.697495	0.673421
GO:0009251	glucan catabolic process	19	0.480551	1.36425	0.0976253	0.697495	0.673421
GO:0006626	protein targeting to mitochondrion	135	0.319411	1.24082	0.0976397	0.697495	0.673421
GO:0006023	aminoglycan biosynthetic process	98	0.335947	1.26486	0.097944	0.698353	0.674249
GO:1901136	carbohydrate derivative catabolic process	158	0.312102	1.22786	0.0981354	0.698353	0.674249
GO:0007130	synaptonemal complex assembly	13	-0.440348	-1.38629	0.0983389	0.698353	0.674249
GO:0030307	positive regulation of cell growth	139	0.317784	1.23751	0.0983628	0.698353	0.674249
GO:0050770	regulation of axonogenesis	160	0.311502	1.22668	0.0984392	0.698353	0.674249
GO:0035338	long-chain fatty-acyl-CoA biosynthetic process	16	0.501783	1.3668	0.0988697	0.698353	0.674249
GO:0046626	regulation of insulin receptor signaling pathway	45	-0.283388	-1.26505	0.0989569	0.698353	0.674249
GO:0007599	hemostasis	291	0.28951	1.17992	0.0991439	0.698353	0.674249
GO:0032769	negative regulation of monooxygenase activity	11	-0.470474	-1.39871	0.0994109	0.698353	0.674249
GO:0038094	Fc-gamma receptor signaling pathway	75	0.35166	1.28219	0.0994944	0.698353	0.674249
GO:0071300	cellular response to retinoic acid	58	0.369558	1.29972	0.0996613	0.698353	0.674249
GO:0072330	monocarboxylic acid biosynthetic process	248	0.294555	1.19172	0.0997255	0.698353	0.674249
GO:0045839	negative regulation of mitotic nuclear division	43	0.393399	1.31866	0.0997669	0.698353	0.674249
GO:0060411	cardiac septum morphogenesis	62	0.364501	1.2944	0.0997827	0.698353	0.674249
GO:0001958	endochondral ossification	24	0.451336	1.35067	0.0998046	0.698353	0.674249
GO:0036075	replacement ossification	24	0.451336	1.35067	0.0998046	0.698353	0.674249
GO:1903844	regulation of cellular response to transforming growth factor beta stimulus	99	0.334786	1.26182	0.0999409	0.698353	0.674249
GO:0034086	maintenance of sister chromatid cohesion	11	0.55468	1.37169	0.100039	0.698353	0.674249
GO:0034088	maintenance of mitotic sister chromatid cohesion	11	0.55468	1.37169	0.100039	0.698353	0.674249
GO:0046622	positive regulation of organ growth	42	0.395199	1.31942	0.100338	0.699282	0.675146
GO:0006884	cell volume homeostasis	22	0.46111	1.35363	0.100455	0.699282	0.675146
GO:0030042	actin filament depolymerization	47	0.385656	1.3122	0.100541	0.699282	0.675146
GO:0042177	negative regulation of protein catabolic process	105	0.33117	1.25621	0.100652	0.699282	0.675146
GO:0051195	negative regulation of cofactor metabolic process	16	0.500522	1.36337	0.100907	0.699676	0.675526
GO:0070571	negative regulation of neuron projection regeneration	15	0.509103	1.36472	0.101252	0.699676	0.675526
GO:0002418	immune response to tumor cell	16	0.500303	1.36277	0.101289	0.699676	0.675526
GO:0032604	granulocyte macrophage colony-stimulating factor production	11	-0.469069	-1.39454	0.10129	0.699676	0.675526
GO:0051953	negative regulation of amine transport	21	0.466043	1.35389	0.101509	0.699676	0.675526
GO:0046425	regulation of JAK-STAT cascade	123	0.322779	1.24347	0.101523	0.699676	0.675526
GO:1903792	negative regulation of anion transport	20	0.472004	1.35605	0.101645	0.699676	0.675526
GO:0097485	neuron projection guidance	237	0.295677	1.19336	0.101955	0.699676	0.675526
GO:0031345	negative regulation of cell projection organization	147	0.314255	1.22942	0.102062	0.699676	0.675526
GO:0035743	CD4-positive, alpha-beta T cell cytokine production	12	-0.452114	-1.38509	0.102106	0.699676	0.675526
GO:0051156	glucose 6-phosphate metabolic process	26	0.441351	1.34358	0.102212	0.699676	0.675526
GO:0051186	cofactor metabolic process	489	0.275142	1.14139	0.10238	0.699676	0.675526
GO:0060688	regulation of morphogenesis of a branching structure	46	0.386536	1.31064	0.102452	0.699676	0.675526
GO:1902743	regulation of lamellipodium organization	36	0.408301	1.32561	0.10259	0.699676	0.675526
GO:0007596	blood coagulation	286	0.289369	1.17842	0.102593	0.699676	0.675526
GO:1903393	positive regulation of adherens junction organization	22	0.459938	1.35019	0.102632	0.699676	0.675526
GO:1903727	positive regulation of phospholipid metabolic process	39	0.400665	1.31995	0.103094	0.701281	0.677076
GO:0007274	neuromuscular synaptic transmission	23	0.454555	1.34762	0.103108	0.701281	0.677076
GO:0071800	podosome assembly	18	0.483899	1.35638	0.103433	0.70267	0.678418
GO:0010907	positive regulation of glucose metabolic process	30	0.425606	1.33434	0.10358	0.702846	0.678588
GO:1904353	regulation of telomere capping	24	0.449282	1.34452	0.103795	0.703485	0.679204
GO:0086065	cell communication involved in cardiac conduction	48	0.382398	1.30566	0.104271	0.704744	0.680419
GO:0042711	maternal behavior	11	0.551921	1.36487	0.104337	0.704744	0.680419
GO:0010919	regulation of inositol phosphate biosynthetic process	12	-0.450368	-1.37975	0.104382	0.704744	0.680419
GO:0071900	regulation of protein serine/threonine kinase activity	445	0.277002	1.14599	0.104693	0.704744	0.680419
GO:0016999	antibiotic metabolic process	118	0.323918	1.2431	0.104707	0.704744	0.680419
GO:0050905	neuromuscular process	85	0.341977	1.26673	0.104783	0.704744	0.680419
GO:0006925	inflammatory cell apoptotic process	19	0.476468	1.35266	0.104828	0.704744	0.680419
GO:1901019	regulation of calcium ion transmembrane transporter activity	81	0.344847	1.26971	0.105215	0.704983	0.68065
GO:0010632	regulation of epithelial cell migration	186	0.303715	1.20869	0.105221	0.704983	0.68065
GO:0030308	negative regulation of cell growth	152	0.31201	1.22386	0.105231	0.704983	0.68065
GO:0006182	cGMP biosynthetic process	36	0.40689	1.32103	0.105799	0.704983	0.68065
GO:0035722	interleukin-12-mediated signaling pathway	40	0.397177	1.31446	0.1058	0.704983	0.68065
GO:0071349	cellular response to interleukin-12	40	0.397177	1.31446	0.1058	0.704983	0.68065
GO:0033135	regulation of peptidyl-serine phosphorylation	108	0.328153	1.24848	0.105873	0.704983	0.68065
GO:0046676	negative regulation of insulin secretion	34	0.412115	1.32382	0.105902	0.704983	0.68065
GO:0030011	maintenance of cell polarity	16	0.497568	1.35532	0.105953	0.704983	0.68065
GO:0003208	cardiac ventricle morphogenesis	69	0.354896	1.27954	0.106254	0.705665	0.681309
GO:1903522	regulation of blood circulation	251	0.292746	1.18508	0.106601	0.705665	0.681309
GO:0048736	appendage development	155	0.31079	1.22093	0.106693	0.705665	0.681309
GO:0060173	limb development	155	0.31079	1.22093	0.106693	0.705665	0.681309
GO:0014061	regulation of norepinephrine secretion	14	0.515486	1.35832	0.106807	0.705665	0.681309
GO:0016049	cell growth	424	0.277828	1.14776	0.106926	0.705665	0.681309
GO:0003206	cardiac chamber morphogenesis	111	0.326412	1.24522	0.107131	0.705665	0.681309
GO:0007084	mitotic nuclear envelope reassembly	10	0.564459	1.35959	0.107252	0.705665	0.681309
GO:0090026	positive regulation of monocyte chemotaxis	12	-0.448341	-1.37353	0.107279	0.705665	0.681309
GO:0044247	cellular polysaccharide catabolic process	20	0.468864	1.34703	0.107339	0.705665	0.681309
GO:1904892	regulation of STAT cascade	124	0.320748	1.23658	0.107477	0.705665	0.681309
GO:0061756	leukocyte adhesion to vascular endothelial cell	23	-0.350459	-1.31553	0.107582	0.705665	0.681309
GO:0019751	polyol metabolic process	99	0.332423	1.25291	0.107741	0.705665	0.681309
GO:0006513	protein monoubiquitination	57	0.367773	1.29007	0.107753	0.705665	0.681309
GO:0032386	regulation of intracellular transport	363	0.281593	1.15746	0.107967	0.706273	0.681896
GO:0002934	desmosome organization	10	0.5638	1.358	0.108294	0.70742	0.683004
GO:0050817	coagulation	290	0.287886	1.17311	0.108385	0.70742	0.683004
GO:0033028	myeloid cell apoptotic process	29	0.426838	1.32902	0.108511	0.707448	0.683031
GO:0021794	thalamus development	13	0.524828	1.35642	0.108836	0.708771	0.684308
GO:0034497	protein localization to phagophore assembly site	13	0.52472	1.35614	0.109013	0.708937	0.684468
GO:1901615	organic hydroxy compound metabolic process	409	0.2784	1.14883	0.109105	0.708937	0.684468
GO:0043201	response to leucine	10	0.563156	1.35645	0.109289	0.709342	0.684858
GO:1902307	positive regulation of sodium ion transmembrane transport	18	0.480537	1.34695	0.109646	0.710568	0.686042
GO:0051279	regulation of release of sequestered calcium ion into cytosol	67	0.35558	1.27687	0.109722	0.710568	0.686042
GO:0010977	negative regulation of neuron projection development	127	0.31904	1.23274	0.109864	0.7107	0.68617
GO:0002089	lens morphogenesis in camera-type eye	18	0.480231	1.34609	0.110216	0.712185	0.687604
GO:0035305	negative regulation of dephosphorylation	95	0.333727	1.25215	0.110487	0.713018	0.688408
GO:0060192	negative regulation of lipase activity	14	0.513237	1.35239	0.11059	0.713018	0.688408
GO:0030952	establishment or maintenance of cytoskeleton polarity	16	0.494634	1.34733	0.111082	0.714847	0.690174
GO:1901879	regulation of protein depolymerization	72	0.350324	1.27041	0.111196	0.714847	0.690174
GO:0045684	positive regulation of epidermis development	29	0.425528	1.32494	0.111316	0.714847	0.690174
GO:0099601	regulation of neurotransmitter receptor activity	41	0.392698	1.30543	0.111393	0.714847	0.690174
GO:0032482	Rab protein signal transduction	63	0.359216	1.27866	0.111655	0.714847	0.690174
GO:0030166	proteoglycan biosynthetic process	57	0.366306	1.28492	0.111741	0.714847	0.690174
GO:0019184	nonribosomal peptide biosynthetic process	15	0.502835	1.34791	0.111753	0.714847	0.690174
GO:0030835	negative regulation of actin filament depolymerization	35	0.406799	1.31394	0.111856	0.714847	0.690174
GO:0051091	positive regulation of DNA binding transcription factor activity	211	0.297613	1.19359	0.112082	0.715507	0.690812
GO:0043090	amino acid import	21	0.460298	1.3372	0.112334	0.715906	0.691197
GO:0110053	regulation of actin filament organization	217	0.296563	1.1912	0.112391	0.715906	0.691197
GO:0051932	synaptic transmission, GABAergic	42	0.390135	1.30251	0.112619	0.716577	0.691844
GO:0030879	mammary gland development	117	0.322055	1.23492	0.113232	0.719691	0.69485
GO:0032623	interleukin-2 production	46	-0.276938	-1.24293	0.113637	0.720229	0.69537
GO:0051955	regulation of amino acid transport	29	0.424485	1.32169	0.11364	0.720229	0.69537
GO:0030534	adult behavior	120	0.320733	1.2328	0.113688	0.720229	0.69537
GO:0006047	UDP-N-acetylglucosamine metabolic process	13	0.521785	1.34856	0.114055	0.720872	0.695991
GO:1900363	regulation of mRNA polyadenylation	11	-0.45976	-1.36686	0.114085	0.720872	0.695991
GO:0048011	neurotrophin TRK receptor signaling pathway	25	0.439308	1.32629	0.114894	0.720872	0.695991
GO:0048730	epidermis morphogenesis	25	0.439259	1.32614	0.114983	0.720872	0.695991
GO:0019216	regulation of lipid metabolic process	317	0.284103	1.16195	0.115044	0.720872	0.695991
GO:0032435	negative regulation of proteasomal ubiquitin-dependent protein catabolic process	28	0.42724	1.32109	0.115107	0.720872	0.695991
GO:0031032	actomyosin structure organization	164	0.306468	1.20916	0.115167	0.720872	0.695991
GO:1902414	protein localization to cell junction	10	-0.476695	-1.37112	0.115238	0.720872	0.695991
GO:0036151	phosphatidylcholine acyl-chain remodeling	23	0.448264	1.32897	0.115258	0.720872	0.695991
GO:0034969	histone arginine methylation	12	0.532408	1.34759	0.115268	0.720872	0.695991
GO:0060749	mammary gland alveolus development	15	-0.40625	-1.34067	0.115275	0.720872	0.695991
GO:0061377	mammary gland lobule development	15	-0.40625	-1.34067	0.115275	0.720872	0.695991
GO:0034111	negative regulation of homotypic cell-cell adhesion	12	0.532318	1.34736	0.115415	0.720877	0.695996
GO:0006054	N-acetylneuraminate metabolic process	10	0.559253	1.34705	0.115538	0.720877	0.695996
GO:0060627	regulation of vesicle-mediated transport	428	0.276314	1.14183	0.115659	0.720877	0.695996
GO:0032230	positive regulation of synaptic transmission, GABAergic	12	0.532108	1.34683	0.115771	0.720877	0.695996
GO:0046486	glycerolipid metabolic process	383	0.278964	1.14875	0.116031	0.721216	0.696323
GO:0015850	organic hydroxy compound transport	189	0.300726	1.19808	0.116073	0.721216	0.696323
GO:0031110	regulation of microtubule polymerization or depolymerization	65	0.355435	1.271	0.116371	0.722296	0.697366
GO:0030220	platelet formation	17	0.483908	1.33766	0.1165	0.722312	0.697381
GO:0010508	positive regulation of autophagy	94	0.332544	1.24618	0.116842	0.722312	0.697381
GO:1904035	regulation of epithelial cell apoptotic process	58	0.363076	1.27692	0.117327	0.722312	0.697381
GO:0000271	polysaccharide biosynthetic process	65	0.355091	1.26977	0.117369	0.722312	0.697381
GO:0006836	neurotransmitter transport	217	0.295528	1.18704	0.117586	0.722312	0.697381
GO:0051865	protein autoubiquitination	49	0.375699	1.28695	0.117748	0.722312	0.697381
GO:0046148	pigment biosynthetic process	46	0.380554	1.29036	0.117827	0.722312	0.697381
GO:1903421	regulation of synaptic vesicle recycling	14	0.509149	1.34162	0.117879	0.722312	0.697381
GO:0030301	cholesterol transport	69	0.35099	1.26546	0.117886	0.722312	0.697381
GO:0009147	pyrimidine nucleoside triphosphate metabolic process	20	0.463254	1.33092	0.117969	0.722312	0.697381
GO:0044273	sulfur compound catabolic process	42	0.388012	1.29542	0.117994	0.722312	0.697381
GO:0030004	cellular monovalent inorganic cation homeostasis	99	0.329449	1.2417	0.118101	0.722312	0.697381
GO:0044264	cellular polysaccharide metabolic process	79	0.342293	1.25645	0.118133	0.722312	0.697381
GO:0051153	regulation of striated muscle cell differentiation	85	0.337836	1.25139	0.118337	0.722312	0.697381
GO:0051055	negative regulation of lipid biosynthetic process	43	-0.281384	-1.24294	0.118343	0.722312	0.697381
GO:0014066	regulation of phosphatidylinositol 3-kinase signaling	90	0.334431	1.24711	0.118527	0.722312	0.697381
GO:0010172	embryonic body morphogenesis	11	0.54308	1.34301	0.118733	0.722312	0.697381
GO:0005979	regulation of glycogen biosynthetic process	22	0.451537	1.32552	0.118972	0.722312	0.697381
GO:0010962	regulation of glucan biosynthetic process	22	0.451537	1.32552	0.118972	0.722312	0.697381
GO:0014009	glial cell proliferation	33	0.409227	1.30722	0.119091	0.722312	0.697381
GO:0031106	septin ring organization	17	0.482426	1.33356	0.119346	0.722312	0.697381
GO:0051193	regulation of cofactor metabolic process	89	0.334673	1.24649	0.119825	0.722312	0.697381
GO:0002828	regulation of type 2 immune response	23	-0.344687	-1.29386	0.120066	0.722312	0.697381
GO:0050884	neuromuscular process controlling posture	12	0.529507	1.34025	0.120175	0.722312	0.697381
GO:0070977	bone maturation	16	0.489667	1.3338	0.120241	0.722312	0.697381
GO:0030834	regulation of actin filament depolymerization	44	0.383198	1.28952	0.120253	0.722312	0.697381
GO:1902745	positive regulation of lamellipodium organization	21	0.456298	1.32558	0.120266	0.722312	0.697381
GO:0045137	development of primary sexual characteristics	186	0.30046	1.19573	0.120313	0.722312	0.697381
GO:0051956	negative regulation of amino acid transport	10	0.556309	1.33996	0.120406	0.722312	0.697381
GO:0060456	positive regulation of digestive system process	12	0.529123	1.33928	0.120804	0.722312	0.697381
GO:0009151	purine deoxyribonucleotide metabolic process	11	-0.455097	-1.353	0.120897	0.722312	0.697381
GO:0044331	cell-cell adhesion mediated by cadherin	31	0.414473	1.30804	0.120923	0.722312	0.697381
GO:0015807	L-amino acid transport	55	0.365552	1.27526	0.121285	0.722312	0.697381
GO:0072655	establishment of protein localization to mitochondrion	171	0.303492	1.201	0.121317	0.722312	0.697381
GO:0060359	response to ammonium ion	106	0.324893	1.23365	0.121398	0.722312	0.697381
GO:0035023	regulation of Rho protein signal transduction	114	0.321141	1.22834	0.121425	0.722312	0.697381
GO:0000245	spliceosomal complex assembly	55	-0.260722	-1.21793	0.121462	0.722312	0.697381
GO:0001662	behavioral fear response	32	0.411111	1.30548	0.12154	0.722312	0.697381
GO:0002209	behavioral defense response	32	0.411111	1.30548	0.12154	0.722312	0.697381
GO:0008356	asymmetric cell division	18	0.474145	1.32904	0.121644	0.722312	0.697381
GO:0051817	modification of morphology or physiology of other organism involved in symbiotic interaction	95	0.330542	1.2402	0.121777	0.722312	0.697381
GO:0090136	epithelial cell-cell adhesion	16	0.488854	1.33158	0.121824	0.722312	0.697381
GO:0071242	cellular response to ammonium ion	52	0.369548	1.27791	0.121887	0.722312	0.697381
GO:0035306	positive regulation of dephosphorylation	45	0.380695	1.28609	0.12199	0.722312	0.697381
GO:0048662	negative regulation of smooth muscle cell proliferation	40	0.390557	1.29255	0.12217	0.722312	0.697381
GO:1902259	regulation of delayed rectifier potassium channel activity	15	0.497174	1.33274	0.122217	0.722312	0.697381
GO:0010862	positive regulation of pathway-restricted SMAD protein phosphorylation	40	0.390489	1.29233	0.122357	0.722312	0.697381
GO:0071498	cellular response to fluid shear stress	18	0.473738	1.3279	0.12245	0.722312	0.697381
GO:0043496	regulation of protein homodimerization activity	19	-0.368642	-1.30863	0.122507	0.722312	0.697381
GO:0048199	vesicle targeting, to, from or within Golgi	67	0.351384	1.26181	0.122686	0.722312	0.697381
GO:0018212	peptidyl-tyrosine modification	326	0.28203	1.15468	0.123138	0.722312	0.697381
GO:1904152	regulation of retrograde protein transport, ER to cytosol	13	-0.424144	-1.33528	0.123362	0.722312	0.697381
GO:0007613	memory	104	0.325269	1.23266	0.123421	0.722312	0.697381
GO:0018108	peptidyl-tyrosine phosphorylation	323	0.282258	1.15519	0.123513	0.722312	0.697381
GO:0019226	transmission of nerve impulse	60	0.358445	1.26692	0.123709	0.722312	0.697381
GO:0045669	positive regulation of osteoblast differentiation	52	0.36881	1.27536	0.12405	0.722312	0.697381
GO:1903539	protein localization to postsynaptic membrane	12	0.52719	1.33438	0.124088	0.722312	0.697381
GO:0032272	negative regulation of protein polymerization	63	0.354972	1.26356	0.124362	0.722312	0.697381
GO:0044804	autophagy of nucleus	17	0.479853	1.32645	0.124445	0.722312	0.697381
GO:0045649	regulation of macrophage differentiation	19	0.4661	1.32323	0.124531	0.722312	0.697381
GO:0043981	histone H4-K5 acetylation	15	0.495892	1.3293	0.124599	0.722312	0.697381
GO:0043982	histone H4-K8 acetylation	15	0.495892	1.3293	0.124599	0.722312	0.697381
GO:0071577	zinc ion transmembrane transport	20	0.460024	1.32163	0.124601	0.722312	0.697381
GO:0006024	glycosaminoglycan biosynthetic process	94	0.33037	1.23804	0.124627	0.722312	0.697381
GO:0051000	positive regulation of nitric-oxide synthase activity	17	0.479733	1.32612	0.124676	0.722312	0.697381
GO:0051209	release of sequestered calcium ion into cytosol	100	0.32707	1.23416	0.124797	0.722312	0.697381
GO:0051283	negative regulation of sequestering of calcium ion	100	0.32707	1.23416	0.124797	0.722312	0.697381
GO:0031113	regulation of microtubule polymerization	43	0.383331	1.28491	0.125068	0.722312	0.697381
GO:0015874	norepinephrine transport	19	0.465814	1.32242	0.125083	0.722312	0.697381
GO:2000778	positive regulation of interleukin-6 secretion	19	-0.367332	-1.30398	0.125374	0.722312	0.697381
GO:0048641	regulation of skeletal muscle tissue development	46	0.377739	1.28081	0.125445	0.722312	0.697381
GO:0032273	positive regulation of protein polymerization	113	0.320521	1.22488	0.125557	0.722312	0.697381
GO:0000086	G2/M transition of mitotic cell cycle	215	0.294275	1.18142	0.125668	0.722312	0.697381
GO:0002521	leukocyte differentiation	403	0.27628	1.13956	0.125956	0.722312	0.697381
GO:0016226	iron-sulfur cluster assembly	16	0.486361	1.32479	0.126519	0.722312	0.697381
GO:0031163	metallo-sulfur cluster assembly	16	0.486361	1.32479	0.126519	0.722312	0.697381
GO:0005976	polysaccharide metabolic process	90	0.332126	1.23852	0.126677	0.722312	0.697381
GO:0010771	negative regulation of cell morphogenesis involved in differentiation	82	0.33754	1.24483	0.126738	0.722312	0.697381
GO:0050873	brown fat cell differentiation	33	0.406088	1.29719	0.12675	0.722312	0.697381
GO:0046824	positive regulation of nucleocytoplasmic transport	54	0.365087	1.27013	0.126848	0.722312	0.697381
GO:0006903	vesicle targeting	82	0.337477	1.2446	0.126977	0.722312	0.697381
GO:0030516	regulation of axon extension	81	0.338057	1.24471	0.127472	0.722312	0.697381
GO:0048008	platelet-derived growth factor receptor signaling pathway	51	0.36904	1.27224	0.127722	0.722312	0.697381
GO:0071354	cellular response to interleukin-6	27	-0.323328	-1.26883	0.127806	0.722312	0.697381
GO:0043123	positive regulation of I-kappaB kinase/NF-kappaB signaling	137	0.311128	1.21021	0.12796	0.722312	0.697381
GO:0071772	response to BMP	135	0.311806	1.21128	0.127984	0.722312	0.697381
GO:0071773	cellular response to BMP stimulus	135	0.311806	1.21128	0.127984	0.722312	0.697381
GO:2000727	positive regulation of cardiac muscle cell differentiation	16	0.485591	1.32269	0.128057	0.722312	0.697381
GO:0006171	cAMP biosynthetic process	57	0.360705	1.26527	0.128307	0.722312	0.697381
GO:0048705	skeletal system morphogenesis	179	0.300214	1.19171	0.12852	0.722312	0.697381
GO:0010817	regulation of hormone levels	440	0.273839	1.13252	0.128779	0.722312	0.697381
GO:0061025	membrane fusion	203	0.295578	1.18281	0.129065	0.722312	0.697381
GO:0001756	somitogenesis	56	0.361628	1.26501	0.129113	0.722312	0.697381
GO:0036344	platelet morphogenesis	18	0.470405	1.31855	0.129145	0.722312	0.697381
GO:0009209	pyrimidine ribonucleoside triphosphate biosynthetic process	13	0.513195	1.32636	0.129189	0.722312	0.697381
GO:0060736	prostate gland growth	11	-0.449666	-1.33685	0.12928	0.722312	0.697381
GO:0001776	leukocyte homeostasis	74	0.342913	1.24813	0.129291	0.722312	0.697381
GO:0007411	axon guidance	235	0.290612	1.17245	0.129648	0.722312	0.697381
GO:0046320	regulation of fatty acid oxidation	26	0.428448	1.30429	0.129742	0.722312	0.697381
GO:0050714	positive regulation of protein secretion	201	0.295769	1.18283	0.129862	0.722312	0.697381
GO:1902751	positive regulation of cell cycle G2/M phase transition	25	0.432383	1.30538	0.12993	0.722312	0.697381
GO:0035307	positive regulation of protein dephosphorylation	34	0.402012	1.29136	0.129997	0.722312	0.697381
GO:0072044	collecting duct development	12	-0.433814	-1.32903	0.130042	0.722312	0.697381
GO:0030902	hindbrain development	130	0.313002	1.21195	0.13006	0.722312	0.697381
GO:0097305	response to alcohol	164	0.303198	1.19626	0.130084	0.722312	0.697381
GO:0097503	sialylation	17	0.477093	1.31882	0.1301	0.722312	0.697381
GO:0061180	mammary gland epithelium development	58	0.358737	1.26166	0.130388	0.722312	0.697381
GO:0043507	positive regulation of JUN kinase activity	61	0.35515	1.25822	0.130492	0.722312	0.697381
GO:0019852	L-ascorbic acid metabolic process	10	0.550474	1.3259	0.130497	0.722312	0.697381
GO:0030509	BMP signaling pathway	126	0.314222	1.2132	0.130694	0.722312	0.697381
GO:0046467	membrane lipid biosynthetic process	120	0.316476	1.21643	0.130742	0.722312	0.697381
GO:1904037	positive regulation of epithelial cell apoptotic process	23	0.440937	1.30724	0.130758	0.722312	0.697381
GO:0030838	positive regulation of actin filament polymerization	84	0.33499	1.23905	0.130762	0.722312	0.697381
GO:0061339	establishment or maintenance of monopolar cell polarity	18	0.469513	1.31605	0.13097	0.722312	0.697381
GO:0048599	oocyte development	33	-0.301594	-1.2489	0.130983	0.722312	0.697381
GO:0010829	negative regulation of glucose transmembrane transport	14	-0.40774	-1.31553	0.131194	0.722312	0.697381
GO:0006084	acetyl-CoA metabolic process	34	0.401503	1.28973	0.131231	0.722312	0.697381
GO:0048265	response to pain	23	0.440709	1.30657	0.131236	0.722312	0.697381
GO:0045056	transcytosis	14	0.501929	1.3226	0.131242	0.722312	0.697381
GO:0035774	positive regulation of insulin secretion involved in cellular response to glucose stimulus	26	0.427738	1.30213	0.131335	0.722312	0.697381
GO:0042326	negative regulation of phosphorylation	416	0.274796	1.13457	0.131547	0.722312	0.697381
GO:0045665	negative regulation of neuron differentiation	189	0.29761	1.18567	0.131548	0.722312	0.697381
GO:1901021	positive regulation of calcium ion transmembrane transporter activity	30	0.413195	1.29543	0.131719	0.722312	0.697381
GO:0018198	peptidyl-cysteine modification	43	0.380886	1.27672	0.13181	0.722312	0.697381
GO:0042594	response to starvation	161	0.303503	1.19577	0.132123	0.722312	0.697381
GO:2000257	regulation of protein activation cascade	33	0.403746	1.28971	0.132552	0.722312	0.697381
GO:1902803	regulation of synaptic vesicle transport	27	0.423261	1.2987	0.132863	0.722312	0.697381
GO:1903897	regulation of PERK-mediated unfolded protein response	10	-0.464784	-1.33686	0.133013	0.722312	0.697381
GO:0098900	regulation of action potential	46	0.375012	1.27157	0.133013	0.722312	0.697381
GO:2000171	negative regulation of dendrite development	24	0.435291	1.30266	0.133056	0.722312	0.697381
GO:0051926	negative regulation of calcium ion transport	53	0.364322	1.26368	0.133251	0.722312	0.697381
GO:0034314	Arp2/3 complex-mediated actin nucleation	31	0.409294	1.2917	0.133277	0.722312	0.697381
GO:0097329	response to antimetabolite	12	0.522099	1.3215	0.133348	0.722312	0.697381
GO:0016074	snoRNA metabolic process	12	-0.431861	-1.32305	0.133389	0.722312	0.697381
GO:0032400	melanosome localization	26	0.426827	1.29936	0.133459	0.722312	0.697381
GO:0043406	positive regulation of MAP kinase activity	239	0.289455	1.16881	0.133529	0.722312	0.697381
GO:0007095	mitotic G2 DNA damage checkpoint	19	0.461761	1.31091	0.133564	0.722312	0.697381
GO:0030510	regulation of BMP signaling pathway	71	0.344293	1.24626	0.133745	0.722312	0.697381
GO:0032634	interleukin-5 production	16	-0.386423	-1.30162	0.133782	0.722312	0.697381
GO:0048207	vesicle targeting, rough ER to cis-Golgi	59	0.35639	1.25655	0.133867	0.722312	0.697381
GO:0048208	COPII vesicle coating	59	0.35639	1.25655	0.133867	0.722312	0.697381
GO:0032570	response to progesterone	37	0.392712	1.28158	0.134325	0.723746	0.698766
GO:1902105	regulation of leukocyte differentiation	215	0.292642	1.17486	0.134564	0.723746	0.698766
GO:0048799	animal organ maturation	18	0.467783	1.3112	0.134571	0.723746	0.698766
GO:0015919	peroxisomal membrane transport	15	-0.395775	-1.3061	0.13463	0.723746	0.698766
GO:0018107	peptidyl-threonine phosphorylation	111	0.319161	1.21756	0.135178	0.725261	0.700229
GO:1900449	regulation of glutamate receptor signaling pathway	39	0.387743	1.27738	0.135285	0.725261	0.700229
GO:0007413	axonal fasciculation	20	0.454768	1.30653	0.135592	0.725261	0.700229
GO:0106030	neuron projection fasciculation	20	0.454768	1.30653	0.135592	0.725261	0.700229
GO:0072017	distal tubule development	12	-0.430371	-1.31848	0.136063	0.725261	0.700229
GO:2000300	regulation of synaptic vesicle exocytosis	25	0.429651	1.29713	0.136143	0.725261	0.700229
GO:0006112	energy reserve metabolic process	71	0.343566	1.24362	0.136255	0.725261	0.700229
GO:0045821	positive regulation of glycolytic process	16	0.481361	1.31117	0.136402	0.725261	0.700229
GO:0051197	positive regulation of coenzyme metabolic process	16	0.481361	1.31117	0.136402	0.725261	0.700229
GO:0043471	regulation of cellular carbohydrate catabolic process	10	0.547175	1.31795	0.13643	0.725261	0.700229
GO:0010273	detoxification of copper ion	10	-0.462364	-1.3299	0.13659	0.725261	0.700229
GO:1990169	stress response to copper ion	10	-0.462364	-1.3299	0.13659	0.725261	0.700229
GO:0031269	pseudopodium assembly	10	0.547005	1.31755	0.136735	0.725261	0.700229
GO:0031272	regulation of pseudopodium assembly	10	0.547005	1.31755	0.136735	0.725261	0.700229
GO:0032288	myelin assembly	17	0.473797	1.30971	0.136781	0.725261	0.700229
GO:0002526	acute inflammatory response	121	0.314605	1.21017	0.137285	0.725546	0.700504
GO:0007080	mitotic metaphase plate congression	39	0.386983	1.27488	0.137331	0.725546	0.700504
GO:0031954	positive regulation of protein autophosphorylation	25	0.42913	1.29556	0.137345	0.725546	0.700504
GO:0032528	microvillus organization	23	0.438009	1.29856	0.1374	0.725546	0.700504
GO:0035767	endothelial cell chemotaxis	25	0.429082	1.29541	0.137457	0.725546	0.700504
GO:1904029	regulation of cyclin-dependent protein kinase activity	83	0.333787	1.2328	0.137583	0.725552	0.70051
GO:0006704	glucocorticoid biosynthetic process	15	0.489234	1.31146	0.137711	0.725569	0.700526
GO:2000177	regulation of neural precursor cell proliferation	68	0.345672	1.2438	0.138434	0.726145	0.701082
GO:0070838	divalent metal ion transport	393	0.275141	1.13396	0.1386	0.726145	0.701082
GO:0007190	activation of adenylate cyclase activity	29	0.413738	1.28823	0.138621	0.726145	0.701082
GO:0045834	positive regulation of lipid metabolic process	110	0.31872	1.21474	0.138776	0.726145	0.701082
GO:2000677	regulation of transcription regulatory region DNA binding	41	0.382296	1.27085	0.13878	0.726145	0.701082
GO:0010038	response to metal ion	292	0.282604	1.15194	0.138975	0.726145	0.701082
GO:0001933	negative regulation of protein phosphorylation	382	0.275753	1.13544	0.139004	0.726145	0.701082
GO:0098751	bone cell development	31	0.407024	1.28453	0.139029	0.726145	0.701082
GO:0051282	regulation of sequestering of calcium ion	101	0.322867	1.21962	0.139322	0.726145	0.701082
GO:0035384	thioester biosynthetic process	46	0.372851	1.26424	0.1394	0.726145	0.701082
GO:0071616	acyl-CoA biosynthetic process	46	0.372851	1.26424	0.1394	0.726145	0.701082
GO:0042440	pigment metabolic process	54	0.36094	1.25571	0.13943	0.726145	0.701082
GO:0032674	regulation of interleukin-5 production	15	-0.393201	-1.29761	0.139469	0.726145	0.701082
GO:0010971	positive regulation of G2/M transition of mitotic cell cycle	22	0.442018	1.29758	0.139661	0.726145	0.701082
GO:2000351	regulation of endothelial cell apoptotic process	38	0.38841	1.27375	0.139733	0.726145	0.701082
GO:0060119	inner ear receptor cell development	39	0.386046	1.27179	0.139922	0.726145	0.701082
GO:0007548	sex differentiation	225	0.290236	1.16815	0.139941	0.726145	0.701082
GO:0002262	myeloid cell homeostasis	130	0.310686	1.20298	0.140286	0.726673	0.701592
GO:0042776	mitochondrial ATP synthesis coupled proton transport	18	-0.367357	-1.28308	0.140292	0.726673	0.701592
GO:1903533	regulation of protein targeting	116	0.315623	1.20926	0.140939	0.727799	0.702679
GO:0031000	response to caffeine	18	-0.367066	-1.28206	0.141047	0.727799	0.702679
GO:0036270	response to diuretic	18	-0.367066	-1.28206	0.141047	0.727799	0.702679
GO:0045926	negative regulation of growth	209	0.29239	1.17202	0.141071	0.727799	0.702679
GO:0051894	positive regulation of focal adhesion assembly	20	0.452148	1.29901	0.141135	0.727799	0.702679
GO:0036499	PERK-mediated unfolded protein response	21	-0.347268	-1.26986	0.141476	0.728584	0.703436
GO:2000573	positive regulation of DNA biosynthetic process	60	0.352803	1.24698	0.141577	0.728584	0.703436
GO:0006413	translational initiation	171	0.299314	1.18447	0.141662	0.728584	0.703436
GO:0046888	negative regulation of hormone secretion	56	0.357584	1.25087	0.141846	0.728887	0.703729
GO:0045010	actin nucleation	44	0.375319	1.26301	0.142354	0.729107	0.703942
GO:0035246	peptidyl-arginine N-methylation	11	0.52992	1.31046	0.142395	0.729107	0.703942
GO:1902883	negative regulation of response to oxidative stress	41	0.380868	1.2661	0.142802	0.729107	0.703942
GO:0031641	regulation of myelination	30	0.408735	1.28145	0.142867	0.729107	0.703942
GO:0001523	retinoid metabolic process	73	0.339898	1.23481	0.142907	0.729107	0.703942
GO:0030490	maturation of SSU-rRNA	51	0.364019	1.25493	0.14305	0.729107	0.703942
GO:0042220	response to cocaine	43	0.376974	1.2636	0.143066	0.729107	0.703942
GO:0048489	synaptic vesicle transport	107	0.318965	1.21236	0.14324	0.729107	0.703942
GO:0097480	establishment of synaptic vesicle localization	107	0.318965	1.21236	0.14324	0.729107	0.703942
GO:1990126	retrograde transport, endosome to plasma membrane	15	-0.391243	-1.29114	0.14337	0.729107	0.703942
GO:0050650	chondroitin sulfate proteoglycan biosynthetic process	29	0.411756	1.28206	0.143432	0.729107	0.703942
GO:0051592	response to calcium ion	109	0.318119	1.21133	0.143478	0.729107	0.703942
GO:0038202	TORC1 signaling	30	0.408477	1.28064	0.143517	0.729107	0.703942
GO:0006568	tryptophan metabolic process	10	0.543308	1.30864	0.143647	0.729129	0.703963
GO:1901989	positive regulation of cell cycle phase transition	72	0.340506	1.2348	0.143911	0.729832	0.704642
GO:0045161	neuronal ion channel clustering	11	0.52891	1.30797	0.144367	0.731511	0.706263
GO:0048169	regulation of long-term neuronal synaptic plasticity	25	0.426037	1.28622	0.144793	0.73303	0.707729
GO:0051146	striated muscle cell differentiation	225	0.289357	1.16461	0.145004	0.733462	0.708147
GO:0006816	calcium ion transport	357	0.276516	1.13591	0.145318	0.734409	0.709061
GO:0016114	terpenoid biosynthetic process	14	0.494672	1.30347	0.145492	0.734654	0.709297
GO:0042135	neurotransmitter catabolic process	20	0.450059	1.293	0.145872	0.735935	0.710534
GO:0000921	septin ring assembly	15	0.485202	1.30065	0.146299	0.736769	0.711339
GO:0070125	mitochondrial translational elongation	80	0.333598	1.22648	0.146337	0.736769	0.711339
GO:1904375	regulation of protein localization to cell periphery	84	0.330776	1.22346	0.146532	0.736769	0.711339
GO:0031279	regulation of cyclase activity	44	0.373912	1.25827	0.146544	0.736769	0.711339
GO:0035635	entry of bacterium into host cell	17	-0.371894	-1.27642	0.14671	0.73697	0.711533
GO:0061053	somite development	73	0.338763	1.23069	0.1471	0.737514	0.712059
GO:0060191	regulation of lipase activity	71	0.340481	1.23246	0.14726	0.737514	0.712059
GO:0070304	positive regulation of stress-activated protein kinase signaling cascade	125	0.31085	1.19931	0.147305	0.737514	0.712059
GO:0031440	regulation of mRNA 3'-end processing	21	-0.345015	-1.26162	0.147326	0.737514	0.712059
GO:1903051	negative regulation of proteolysis involved in cellular protein catabolic process	56	0.355782	1.24457	0.147848	0.739029	0.713522
GO:0046475	glycerophospholipid catabolic process	16	0.476086	1.2968	0.147882	0.739029	0.713522
GO:0033555	multicellular organismal response to stress	60	0.350845	1.24006	0.148215	0.739653	0.714124
GO:0045579	positive regulation of B cell differentiation	13	-0.410267	-1.29159	0.148261	0.739653	0.714124
GO:0001573	ganglioside metabolic process	17	-0.371085	-1.27365	0.148518	0.740302	0.71475
GO:0070365	hepatocyte differentiation	14	0.49309	1.29931	0.148823	0.741188	0.715606
GO:0001774	microglial cell activation	21	0.442911	1.28669	0.149443	0.743638	0.717971
GO:0035336	long-chain fatty-acyl-CoA metabolic process	22	0.437556	1.28448	0.150102	0.746282	0.720524
GO:0065004	protein-DNA complex assembly	201	0.292067	1.16802	0.150377	0.74674	0.720966
GO:0033692	cellular polysaccharide biosynthetic process	58	0.35257	1.23997	0.150523	0.74674	0.720966
GO:0031268	pseudopodium organization	11	0.525597	1.29977	0.150851	0.74674	0.720966
GO:0048593	camera-type eye morphogenesis	99	0.321041	1.21001	0.151063	0.74674	0.720966
GO:0050982	detection of mechanical stimulus	36	0.388931	1.26272	0.15128	0.74674	0.720966
GO:0019932	second-messenger-mediated signaling	289	0.281066	1.14514	0.151351	0.74674	0.720966
GO:0060291	long-term synaptic potentiation	68	0.342003	1.23059	0.151399	0.74674	0.720966
GO:0043009	chordate embryonic development	496	0.268578	1.11459	0.1515	0.74674	0.720966
GO:0070671	response to interleukin-12	41	0.377829	1.256	0.151771	0.74674	0.720966
GO:0060412	ventricular septum morphogenesis	37	0.386422	1.26106	0.151821	0.74674	0.720966
GO:2001234	negative regulation of apoptotic signaling pathway	189	0.293811	1.17053	0.152214	0.74674	0.720966
GO:0060402	calcium ion transport into cytosol	129	0.308389	1.19325	0.152531	0.74674	0.720966
GO:0045954	positive regulation of natural killer cell mediated cytotoxicity	20	0.447063	1.2844	0.152663	0.74674	0.720966
GO:0006732	coenzyme metabolic process	330	0.277419	1.13634	0.152901	0.74674	0.720966
GO:0030218	erythrocyte differentiation	101	0.319566	1.20715	0.153045	0.74674	0.720966
GO:0010171	body morphogenesis	45	0.370064	1.25018	0.153052	0.74674	0.720966
GO:0019748	secondary metabolic process	58	0.351824	1.23735	0.153073	0.74674	0.720966
GO:0042501	serine phosphorylation of STAT protein	14	0.490939	1.29364	0.153274	0.74674	0.720966
GO:0070875	positive regulation of glycogen metabolic process	14	0.490893	1.29352	0.153351	0.74674	0.720966
GO:1904707	positive regulation of vascular smooth muscle cell proliferation	23	0.431097	1.27807	0.153655	0.74674	0.720966
GO:0006488	dolichol-linked oligosaccharide biosynthetic process	19	0.452673	1.28511	0.153744	0.74674	0.720966
GO:0006490	oligosaccharide-lipid intermediate biosynthetic process	19	0.452673	1.28511	0.153744	0.74674	0.720966
GO:0044458	motile cilium assembly	18	0.458969	1.2865	0.153918	0.74674	0.720966
GO:0051899	membrane depolarization	88	0.326307	1.2138	0.15422	0.74674	0.720966
GO:0010811	positive regulation of cell-substrate adhesion	93	0.323315	1.21021	0.154325	0.74674	0.720966
GO:0030031	cell projection assembly	496	0.268263	1.11328	0.154338	0.74674	0.720966
GO:0031331	positive regulation of cellular catabolic process	300	0.279633	1.14113	0.154376	0.74674	0.720966
GO:0051147	regulation of muscle cell differentiation	131	0.307338	1.19083	0.154449	0.74674	0.720966
GO:0030206	chondroitin sulfate biosynthetic process	25	0.422081	1.27428	0.15461	0.74674	0.720966
GO:0032331	negative regulation of chondrocyte differentiation	16	0.47304	1.28851	0.154617	0.74674	0.720966
GO:0086067	AV node cell to bundle of His cell communication	10	-0.451209	-1.29782	0.154699	0.74674	0.720966
GO:1905207	regulation of cardiocyte differentiation	38	0.383094	1.25632	0.1548	0.74674	0.720966
GO:0032436	positive regulation of proteasomal ubiquitin-dependent protein catabolic process	76	0.334323	1.22099	0.154853	0.74674	0.720966
GO:0014014	negative regulation of gliogenesis	38	0.383064	1.25622	0.154896	0.74674	0.720966
GO:1902914	regulation of protein polyubiquitination	14	-0.395502	-1.27604	0.154938	0.74674	0.720966
GO:0002433	immune response-regulating cell surface receptor signaling pathway involved in phagocytosis	72	0.337553	1.22409	0.15494	0.74674	0.720966
GO:0038096	Fc-gamma receptor signaling pathway involved in phagocytosis	72	0.337553	1.22409	0.15494	0.74674	0.720966
GO:0048016	inositol phosphate-mediated signaling	35	0.389865	1.25924	0.155413	0.746777	0.721002
GO:0035641	locomotory exploration behavior	13	0.499923	1.29205	0.15545	0.746777	0.721002
GO:0045661	regulation of myoblast differentiation	43	0.372867	1.24984	0.155529	0.746777	0.721002
GO:0048146	positive regulation of fibroblast proliferation	46	0.367567	1.24633	0.155541	0.746777	0.721002
GO:1903955	positive regulation of protein targeting to mitochondrion	78	0.332617	1.21892	0.155625	0.746777	0.721002
GO:0060837	blood vessel endothelial cell differentiation	11	-0.434462	-1.29165	0.155717	0.746777	0.721002
GO:0007422	peripheral nervous system development	65	0.343437	1.22809	0.156053	0.747768	0.721959
GO:0060081	membrane hyperpolarization	12	0.510233	1.29146	0.156581	0.749182	0.723324
GO:0001649	osteoblast differentiation	179	0.294932	1.17075	0.156767	0.749182	0.723324
GO:0090201	negative regulation of release of cytochrome c from mitochondria	15	0.480258	1.28739	0.156889	0.749182	0.723324
GO:0002717	positive regulation of natural killer cell mediated immunity	22	0.434692	1.27608	0.156986	0.749182	0.723324
GO:0051386	regulation of neurotrophin TRK receptor signaling pathway	10	0.536489	1.29222	0.156991	0.749182	0.723324
GO:0021549	cerebellum development	86	0.326755	1.21203	0.157373	0.750391	0.724491
GO:0070633	transepithelial transport	16	0.471703	1.28486	0.157653	0.75111	0.725185
GO:0016579	protein deubiquitination	243	0.284907	1.15147	0.158219	0.751942	0.725988
GO:0072378	blood coagulation, fibrin clot formation	19	0.450586	1.27919	0.158515	0.751942	0.725988
GO:0000041	transition metal ion transport	98	0.319747	1.20386	0.158543	0.751942	0.725988
GO:0021680	cerebellar Purkinje cell layer development	20	-0.346584	-1.24904	0.158622	0.751942	0.725988
GO:0030833	regulation of actin filament polymerization	136	0.304945	1.18542	0.158636	0.751942	0.725988
GO:0035335	peptidyl-tyrosine dephosphorylation	90	0.324031	1.20833	0.158774	0.751942	0.725988
GO:0030198	extracellular matrix organization	293	0.279614	1.13992	0.158925	0.751942	0.725988
GO:0046628	positive regulation of insulin receptor signaling pathway	13	0.498178	1.28754	0.159001	0.751942	0.725988
GO:0031114	regulation of microtubule depolymerization	25	0.420351	1.26905	0.159033	0.751942	0.725988
GO:0003281	ventricular septum development	61	0.346754	1.22847	0.159119	0.751942	0.725988
GO:0038127	ERBB signaling pathway	137	0.304514	1.18448	0.159362	0.752479	0.726507
GO:0048557	embryonic digestive tract morphogenesis	18	-0.359044	-1.25404	0.159536	0.752687	0.726708
GO:0030199	collagen fibril organization	38	0.381291	1.2504	0.160168	0.754328	0.728292
GO:0009896	positive regulation of catabolic process	351	0.274909	1.12863	0.16081	0.754328	0.728292
GO:0001937	negative regulation of endothelial cell proliferation	34	0.390527	1.25447	0.160821	0.754328	0.728292
GO:0006486	protein glycosylation	222	0.287186	1.15503	0.160874	0.754328	0.728292
GO:0043413	macromolecule glycosylation	222	0.287186	1.15503	0.160874	0.754328	0.728292
GO:0019377	glycolipid catabolic process	11	-0.431616	-1.28319	0.160885	0.754328	0.728292
GO:0043666	regulation of phosphoprotein phosphatase activity	93	0.321784	1.20448	0.160962	0.754328	0.728292
GO:0014015	positive regulation of gliogenesis	52	0.35698	1.23445	0.161366	0.754328	0.728292
GO:0032692	negative regulation of interleukin-1 production	21	-0.339672	-1.24209	0.161632	0.754328	0.728292
GO:0061318	renal filtration cell differentiation	15	0.477866	1.28098	0.162058	0.754328	0.728292
GO:0072112	glomerular visceral epithelial cell differentiation	15	0.477866	1.28098	0.162058	0.754328	0.728292
GO:0002260	lymphocyte homeostasis	56	0.351573	1.22984	0.16232	0.754328	0.728292
GO:1904031	positive regulation of cyclin-dependent protein kinase activity	36	0.385148	1.25044	0.16234	0.754328	0.728292
GO:0006636	unsaturated fatty acid biosynthetic process	37	0.382809	1.24926	0.162362	0.754328	0.728292
GO:0050730	regulation of peptidyl-tyrosine phosphorylation	200	0.290227	1.16029	0.162393	0.754328	0.728292
GO:0017015	regulation of transforming growth factor beta receptor signaling pathway	97	0.319413	1.20124	0.162417	0.754328	0.728292
GO:0051938	L-glutamate import	11	0.519909	1.28571	0.162461	0.754328	0.728292
GO:0043535	regulation of blood vessel endothelial cell migration	83	0.327456	1.20941	0.162489	0.754328	0.728292
GO:0005978	glycogen biosynthetic process	40	0.376298	1.24536	0.162521	0.754328	0.728292
GO:0009250	glucan biosynthetic process	40	0.376298	1.24536	0.162521	0.754328	0.728292
GO:0048385	regulation of retinoic acid receptor signaling pathway	15	0.477561	1.28017	0.162726	0.754328	0.728292
GO:0031334	positive regulation of protein complex assembly	223	0.286767	1.15363	0.162855	0.754328	0.728292
GO:0070585	protein localization to mitochondrion	174	0.294809	1.16795	0.162967	0.754328	0.728292
GO:1903214	regulation of protein targeting to mitochondrion	87	0.324756	1.20632	0.163085	0.754328	0.728292
GO:0030048	actin filament-based movement	116	0.310784	1.19072	0.163294	0.754328	0.728292
GO:0007389	pattern specification process	360	0.273981	1.12585	0.163456	0.754328	0.728292
GO:0017156	calcium ion regulated exocytosis	103	0.31622	1.19708	0.163496	0.754328	0.728292
GO:0051496	positive regulation of stress fiber assembly	43	0.370287	1.24119	0.163571	0.754328	0.728292
GO:0045071	negative regulation of viral genome replication	49	-0.259422	-1.18159	0.163922	0.754328	0.728292
GO:0042092	type 2 immune response	27	-0.311209	-1.22128	0.163935	0.754328	0.728292
GO:0070306	lens fiber cell differentiation	26	0.41449	1.2618	0.164128	0.754328	0.728292
GO:0006103	2-oxoglutarate metabolic process	17	0.461413	1.27547	0.164183	0.754328	0.728292
GO:0007076	mitotic chromosome condensation	16	-0.372546	-1.25488	0.164268	0.754328	0.728292
GO:0033574	response to testosterone	39	0.37774	1.24443	0.164363	0.754328	0.728292
GO:0014902	myotube differentiation	93	0.320999	1.20154	0.164424	0.754328	0.728292
GO:0051085	chaperone cofactor-dependent protein refolding	25	-0.318919	-1.22579	0.164658	0.754328	0.728292
GO:0006855	drug transmembrane transport	74	0.333299	1.21313	0.165085	0.754328	0.728292
GO:0001782	B cell homeostasis	28	0.406951	1.25835	0.165145	0.754328	0.728292
GO:0038083	peptidyl-tyrosine autophosphorylation	48	0.361451	1.23414	0.165156	0.754328	0.728292
GO:0002220	innate immune response activating cell surface receptor signaling pathway	106	0.314473	1.19408	0.165307	0.754328	0.728292
GO:0072511	divalent inorganic cation transport	397	0.271575	1.11963	0.165484	0.754328	0.728292
GO:0043467	regulation of generation of precursor metabolites and energy	102	0.316217	1.19577	0.165606	0.754328	0.728292
GO:0000712	resolution of meiotic recombination intermediates	11	-0.429152	-1.27586	0.16562	0.754328	0.728292
GO:0046321	positive regulation of fatty acid oxidation	15	0.476312	1.27682	0.165634	0.754328	0.728292
GO:0048284	organelle fusion	158	0.297754	1.17142	0.165821	0.754328	0.728292
GO:0030033	microvillus assembly	16	0.468087	1.27502	0.165875	0.754328	0.728292
GO:0031128	developmental induction	25	0.417717	1.2611	0.165973	0.754328	0.728292
GO:0051784	negative regulation of nuclear division	48	0.361135	1.23306	0.166208	0.754408	0.72837
GO:0034764	positive regulation of transmembrane transport	170	0.29498	1.16685	0.166275	0.754408	0.72837
GO:0045923	positive regulation of fatty acid metabolic process	28	0.406358	1.25652	0.166774	0.754408	0.72837
GO:0031098	stress-activated protein kinase signaling cascade	251	0.282662	1.14426	0.167095	0.754408	0.72837
GO:0030575	nuclear body organization	10	0.531461	1.28011	0.167141	0.754408	0.72837
GO:0002223	stimulatory C-type lectin receptor signaling pathway	103	0.315409	1.194	0.167234	0.754408	0.72837
GO:0006898	receptor-mediated endocytosis	240	0.28391	1.14668	0.167243	0.754408	0.72837
GO:0034123	positive regulation of toll-like receptor signaling pathway	16	-0.371227	-1.25043	0.167368	0.754408	0.72837
GO:1901342	regulation of vasculature development	274	0.28019	1.13889	0.16741	0.754408	0.72837
GO:1900408	negative regulation of cellular response to oxidative stress	39	0.376761	1.2412	0.167416	0.754408	0.72837
GO:1903202	negative regulation of oxidative stress-induced cell death	39	0.376761	1.2412	0.167416	0.754408	0.72837
GO:0006140	regulation of nucleotide metabolic process	172	0.294334	1.16523	0.167963	0.755808	0.729721
GO:0032402	melanosome transport	23	0.425425	1.26125	0.167986	0.755808	0.729721
GO:0009074	aromatic amino acid family catabolic process	17	0.459688	1.27071	0.16827	0.756008	0.729914
GO:0098656	anion transmembrane transport	220	0.286287	1.15082	0.16829	0.756008	0.729914
GO:0008406	gonad development	180	0.292726	1.16244	0.168489	0.756209	0.730108
GO:0060996	dendritic spine development	83	0.326028	1.20414	0.168595	0.756209	0.730108
GO:0071353	cellular response to interleukin-4	28	-0.306032	-1.21298	0.168862	0.756826	0.730704
GO:0042474	middle ear morphogenesis	18	-0.355387	-1.24127	0.169042	0.757047	0.730917
GO:0035176	social behavior	47	0.361752	1.23087	0.169317	0.757114	0.730982
GO:0051703	intraspecies interaction between organisms	47	0.361752	1.23087	0.169317	0.757114	0.730982
GO:0010457	centriole-centriole cohesion	11	-0.427199	-1.27006	0.169507	0.757382	0.731241
GO:0030326	embryonic limb morphogenesis	115	0.309762	1.1858	0.170071	0.758739	0.732551
GO:0035113	embryonic appendage morphogenesis	115	0.309762	1.1858	0.170071	0.758739	0.732551
GO:0009187	cyclic nucleotide metabolic process	124	0.306473	1.18154	0.170397	0.759196	0.732992
GO:0043457	regulation of cellular respiration	19	0.445622	1.26509	0.170558	0.759196	0.732992
GO:0001914	regulation of T cell mediated cytotoxicity	20	0.439523	1.26274	0.170718	0.759196	0.732992
GO:0051208	sequestering of calcium ion	104	0.31406	1.19018	0.171316	0.759196	0.732992
GO:0043518	negative regulation of DNA damage response, signal transduction by p53 class mediator	12	0.502992	1.27313	0.171881	0.759196	0.732992
GO:0032897	negative regulation of viral transcription	23	0.423975	1.25696	0.171916	0.759196	0.732992
GO:0098712	L-glutamate import across plasma membrane	10	0.529009	1.2742	0.172145	0.759196	0.732992
GO:0031057	negative regulation of histone modification	36	-0.281902	-1.1937	0.172363	0.759196	0.732992
GO:0044036	cell wall macromolecule metabolic process	11	-0.425644	-1.26543	0.17237	0.759196	0.732992
GO:0071554	cell wall organization or biogenesis	11	-0.425644	-1.26543	0.17237	0.759196	0.732992
GO:0032984	protein-containing complex disassembly	284	0.278545	1.13403	0.172657	0.759196	0.732992
GO:0051004	regulation of lipoprotein lipase activity	16	0.465137	1.26698	0.172739	0.759196	0.732992
GO:0033138	positive regulation of peptidyl-serine phosphorylation	79	0.327751	1.20307	0.172998	0.759196	0.732992
GO:0070542	response to fatty acid	72	0.332972	1.20748	0.173004	0.759196	0.732992
GO:0046479	glycosphingolipid catabolic process	10	-0.441143	-1.26886	0.173121	0.759196	0.732992
GO:0006919	activation of cysteine-type endopeptidase activity involved in apoptotic process	77	0.329091	1.20396	0.173159	0.759196	0.732992
GO:0045638	negative regulation of myeloid cell differentiation	73	0.332104	1.20649	0.173414	0.759196	0.732992
GO:0034205	amyloid-beta formation	23	0.423399	1.25525	0.173438	0.759196	0.732992
GO:0048741	skeletal muscle fiber development	29	0.400672	1.24754	0.173448	0.759196	0.732992
GO:0007625	grooming behavior	14	0.481662	1.26919	0.173594	0.759196	0.732992
GO:0016482	cytosolic transport	123	0.306188	1.17956	0.173739	0.759196	0.732992
GO:0010675	regulation of cellular carbohydrate metabolic process	106	0.312669	1.18723	0.173898	0.759196	0.732992
GO:0071496	cellular response to external stimulus	276	0.279125	1.13495	0.173923	0.759196	0.732992
GO:0060579	ventral spinal cord interneuron fate commitment	14	-0.386927	-1.24838	0.173954	0.759196	0.732992
GO:0060581	cell fate commitment involved in pattern specification	14	-0.386927	-1.24838	0.173954	0.759196	0.732992
GO:1903146	regulation of autophagy of mitochondrion	45	0.363571	1.22824	0.174148	0.759196	0.732992
GO:0018243	protein O-linked glycosylation via threonine	14	0.481415	1.26854	0.174212	0.759196	0.732992
GO:0032964	collagen biosynthetic process	33	-0.288919	-1.19641	0.174217	0.759196	0.732992
GO:0048846	axon extension involved in axon guidance	31	0.394236	1.24418	0.174224	0.759196	0.732992
GO:1902284	neuron projection extension involved in neuron projection guidance	31	0.394236	1.24418	0.174224	0.759196	0.732992
GO:0006885	regulation of pH	90	0.320477	1.19508	0.174318	0.759196	0.732992
GO:0002902	regulation of B cell apoptotic process	17	0.457006	1.26329	0.174664	0.759196	0.732992
GO:0032874	positive regulation of stress-activated MAPK cascade	124	0.305596	1.17816	0.174907	0.759196	0.732992
GO:0043651	linoleic acid metabolic process	16	0.464245	1.26455	0.174927	0.759196	0.732992
GO:0031640	killing of cells of other organism	40	-0.27273	-1.18402	0.174977	0.759196	0.732992
GO:0044364	disruption of cells of other organism	40	-0.27273	-1.18402	0.174977	0.759196	0.732992
GO:0033173	calcineurin-NFAT signaling cascade	24	0.418363	1.252	0.175031	0.759196	0.732992
GO:0042339	keratan sulfate metabolic process	28	0.403365	1.24727	0.175257	0.759196	0.732992
GO:1904358	positive regulation of telomere maintenance via telomere lengthening	34	0.385693	1.23894	0.175312	0.759196	0.732992
GO:0061383	trabecula morphogenesis	45	0.363204	1.227	0.17539	0.759196	0.732992
GO:0006081	cellular aldehyde metabolic process	70	0.333941	1.20642	0.17575	0.759809	0.733584
GO:0010522	regulation of calcium ion transport into cytosol	86	0.322368	1.19576	0.176158	0.759809	0.733584
GO:0043242	negative regulation of protein complex disassembly	62	0.341179	1.21158	0.176298	0.759809	0.733584
GO:1902166	negative regulation of intrinsic apoptotic signaling pathway in response to DNA damage by p53 class mediator	13	0.490313	1.26722	0.176355	0.759809	0.733584
GO:0016188	synaptic vesicle maturation	11	0.513223	1.26917	0.176428	0.759809	0.733584
GO:0009636	response to toxic substance	426	0.268846	1.1108	0.176542	0.759809	0.733584
GO:0043062	extracellular structure organization	338	0.27382	1.1226	0.176682	0.759809	0.733584
GO:1904666	regulation of ubiquitin protein ligase activity	16	0.463498	1.26251	0.176744	0.759809	0.733584
GO:0051875	pigment granule localization	27	0.406324	1.24673	0.176829	0.759809	0.733584
GO:0051450	myoblast proliferation	18	0.449235	1.25921	0.176836	0.759809	0.733584
GO:0030819	positive regulation of cAMP biosynthetic process	20	0.436898	1.25519	0.177375	0.760795	0.734536
GO:0048791	calcium ion-regulated exocytosis of neurotransmitter	30	0.396152	1.242	0.177422	0.760795	0.734536
GO:0060395	SMAD protein signal transduction	55	0.348553	1.21595	0.177569	0.760795	0.734536
GO:0050878	regulation of body fluid levels	420	0.26905	1.11117	0.17767	0.760795	0.734536
GO:0072577	endothelial cell apoptotic process	43	0.365983	1.22676	0.177719	0.760795	0.734536
GO:0097306	cellular response to alcohol	49	0.356315	1.22055	0.178166	0.762148	0.735842
GO:0032185	septin cytoskeleton organization	18	0.448638	1.25754	0.178327	0.762275	0.735965
GO:0097104	postsynaptic membrane assembly	11	0.512315	1.26693	0.178503	0.762467	0.73615
GO:0048643	positive regulation of skeletal muscle tissue development	22	0.426036	1.25066	0.178897	0.76359	0.737234
GO:0001964	startle response	22	0.425861	1.25015	0.179355	0.764983	0.73858
GO:0090148	membrane fission	11	0.511838	1.26575	0.179598	0.765207	0.738796
GO:2000060	positive regulation of ubiquitin-dependent protein catabolic process	87	0.320858	1.19184	0.180218	0.765207	0.738796
GO:0006283	transcription-coupled nucleotide-excision repair	60	0.342087	1.20911	0.180555	0.765207	0.738796
GO:0032011	ARF protein signal transduction	40	0.370697	1.22683	0.180603	0.765207	0.738796
GO:0032012	regulation of ARF protein signal transduction	40	0.370697	1.22683	0.180603	0.765207	0.738796
GO:0045956	positive regulation of calcium ion-dependent exocytosis	22	0.425333	1.2486	0.180828	0.765207	0.738796
GO:0050768	negative regulation of neurogenesis	241	0.281782	1.13835	0.180866	0.765207	0.738796
GO:0003174	mitral valve development	11	0.511191	1.26415	0.180963	0.765207	0.738796
GO:0032801	receptor catabolic process	30	0.394919	1.23813	0.181095	0.765207	0.738796
GO:0019430	removal of superoxide radicals	20	0.435384	1.25084	0.181236	0.765207	0.738796
GO:1902254	negative regulation of intrinsic apoptotic signaling pathway by p53 class mediator	18	0.447415	1.25411	0.181356	0.765207	0.738796
GO:0090503	RNA phosphodiester bond hydrolysis, exonucleolytic	35	-0.28199	-1.18526	0.181377	0.765207	0.738796
GO:0042149	cellular response to glucose starvation	34	0.383651	1.23238	0.181491	0.765207	0.738796
GO:0001844	protein insertion into mitochondrial membrane involved in apoptotic signaling pathway	28	-0.302304	-1.1982	0.181594	0.765207	0.738796
GO:0010935	regulation of macrophage cytokine production	11	0.510883	1.26339	0.181619	0.765207	0.738796
GO:0042269	regulation of natural killer cell mediated cytotoxicity	33	0.386225	1.23374	0.181637	0.765207	0.738796
GO:0097300	programmed necrotic cell death	31	0.39173	1.23627	0.181699	0.765207	0.738796
GO:0070169	positive regulation of biomineral tissue development	31	0.391708	1.2362	0.181773	0.765207	0.738796
GO:0048245	eosinophil chemotaxis	14	-0.383585	-1.23759	0.181961	0.765445	0.739026
GO:0031929	TOR signaling	93	0.317107	1.18697	0.182108	0.765512	0.73909
GO:0045841	negative regulation of mitotic metaphase/anaphase transition	29	0.397515	1.23771	0.182763	0.767037	0.740563
GO:0060421	positive regulation of heart growth	31	0.391359	1.23509	0.18283	0.767037	0.740563
GO:0015937	coenzyme A biosynthetic process	10	-0.435987	-1.25403	0.182984	0.767037	0.740563
GO:0002793	positive regulation of peptide secretion	221	0.283952	1.14175	0.182998	0.767037	0.740563
GO:0019682	glyceraldehyde-3-phosphate metabolic process	24	0.415238	1.24264	0.183766	0.768103	0.741592
GO:0140014	mitotic nuclear division	232	0.282463	1.13879	0.183789	0.768103	0.741592
GO:0036150	phosphatidylserine acyl-chain remodeling	18	0.44633	1.25107	0.184142	0.768103	0.741592
GO:1901522	positive regulation of transcription from RNA polymerase II promoter involved in cellular response to chemical stimulus	20	0.434209	1.24747	0.184289	0.768103	0.741592
GO:0042306	regulation of protein import into nucleus	48	0.355943	1.21533	0.184325	0.768103	0.741592
GO:0042572	retinol metabolic process	25	0.411029	1.24091	0.184371	0.768103	0.741592
GO:0060644	mammary gland epithelial cell differentiation	16	0.460319	1.25386	0.184412	0.768103	0.741592
GO:0014874	response to stimulus involved in regulation of muscle adaptation	13	0.486724	1.25794	0.184453	0.768103	0.741592
GO:0070198	protein localization to chromosome, telomeric region	25	0.410981	1.24077	0.184501	0.768103	0.741592
GO:0010452	histone H3-K36 methylation	10	0.523112	1.25999	0.184792	0.768103	0.741592
GO:0000732	strand displacement	24	0.414834	1.24143	0.184847	0.768103	0.741592
GO:0008064	regulation of actin polymerization or depolymerization	153	0.295523	1.15979	0.185053	0.768103	0.741592
GO:0030832	regulation of actin filament length	153	0.295523	1.15979	0.185053	0.768103	0.741592
GO:0007595	lactation	38	0.373358	1.22439	0.185218	0.768103	0.741592
GO:0001910	regulation of leukocyte mediated cytotoxicity	51	0.351557	1.21197	0.185315	0.768103	0.741592
GO:0035024	negative regulation of Rho protein signal transduction	18	0.445797	1.24958	0.185542	0.768103	0.741592
GO:0045471	response to ethanol	109	0.309014	1.17667	0.185713	0.768103	0.741592
GO:0050771	negative regulation of axonogenesis	57	0.343988	1.20664	0.185888	0.768103	0.741592
GO:1900739	regulation of protein insertion into mitochondrial membrane involved in apoptotic signaling pathway	27	-0.304723	-1.19582	0.186184	0.768103	0.741592
GO:1900740	positive regulation of protein insertion into mitochondrial membrane involved in apoptotic signaling pathway	27	-0.304723	-1.19582	0.186184	0.768103	0.741592
GO:0021952	central nervous system projection neuron axonogenesis	23	0.418689	1.24128	0.186281	0.768103	0.741592
GO:0051453	regulation of intracellular pH	80	0.323925	1.19091	0.186463	0.768103	0.741592
GO:0071378	cellular response to growth hormone stimulus	23	0.418548	1.24087	0.186652	0.768103	0.741592
GO:1903825	organic acid transmembrane transport	97	0.314145	1.18142	0.186737	0.768103	0.741592
GO:1905039	carboxylic acid transmembrane transport	97	0.314145	1.18142	0.186737	0.768103	0.741592
GO:0070507	regulation of microtubule cytoskeleton organization	151	0.295686	1.15925	0.186754	0.768103	0.741592
GO:0007191	adenylate cyclase-activating dopamine receptor signaling pathway	10	0.522172	1.25773	0.186852	0.768103	0.741592
GO:0000272	polysaccharide catabolic process	22	0.423121	1.24211	0.186946	0.768103	0.741592
GO:0090394	negative regulation of excitatory postsynaptic potential	10	0.521998	1.25731	0.187234	0.768631	0.742101
GO:0030814	regulation of cAMP metabolic process	64	0.336327	1.19994	0.187339	0.768631	0.742101
GO:0048640	negative regulation of developmental growth	80	0.323694	1.19006	0.187514	0.768807	0.742272
GO:1904705	regulation of vascular smooth muscle cell proliferation	37	0.374659	1.22267	0.187892	0.769274	0.742723
GO:1990874	vascular smooth muscle cell proliferation	37	0.374659	1.22267	0.187892	0.769274	0.742723
GO:0002715	regulation of natural killer cell mediated immunity	34	0.38156	1.22567	0.188205	0.770012	0.743435
GO:0034142	toll-like receptor 4 signaling pathway	21	-0.330712	-1.20932	0.18852	0.770762	0.744159
GO:0051125	regulation of actin nucleation	26	0.405613	1.23478	0.188828	0.770844	0.744238
GO:2000765	regulation of cytoplasmic translation	21	-0.330601	-1.20892	0.18893	0.770844	0.744238
GO:2000104	negative regulation of DNA-dependent DNA replication	18	0.444492	1.24592	0.188937	0.770844	0.744238
GO:0048710	regulation of astrocyte differentiation	26	0.405418	1.23419	0.189409	0.771264	0.744644
GO:0043523	regulation of neuron apoptotic process	179	0.289455	1.14901	0.189568	0.771264	0.744644
GO:0060612	adipose tissue development	35	0.378658	1.22304	0.189624	0.771264	0.744644
GO:2000781	positive regulation of double-strand break repair	13	0.484454	1.25207	0.189674	0.771264	0.744644
GO:0045766	positive regulation of angiogenesis	144	0.296901	1.15958	0.18978	0.771264	0.744644
GO:0006878	cellular copper ion homeostasis	12	-0.403311	-1.23558	0.18992	0.771264	0.744644
GO:0017001	antibiotic catabolic process	40	0.367941	1.21771	0.189968	0.771264	0.744644
GO:0051383	kinetochore organization	18	0.444048	1.24467	0.190123	0.771358	0.744734
GO:0000722	telomere maintenance via recombination	13	0.48418	1.25137	0.190289	0.771442	0.744816
GO:0032469	endoplasmic reticulum calcium ion homeostasis	22	0.421791	1.2382	0.190567	0.771442	0.744816
GO:0090287	regulation of cellular response to growth factor stimulus	224	0.282474	1.13668	0.190735	0.771442	0.744816
GO:0061900	glial cell activation	27	0.401379	1.23156	0.190886	0.771442	0.744816
GO:0007589	body fluid secretion	80	0.322929	1.18725	0.1909	0.771442	0.744816
GO:1901990	regulation of mitotic cell cycle phase transition	355	0.271047	1.11322	0.190939	0.771442	0.744816
GO:0034694	response to prostaglandin	28	0.397885	1.23032	0.191155	0.77178	0.745142
GO:1904377	positive regulation of protein localization to cell periphery	54	0.345998	1.20372	0.191537	0.772458	0.745796
GO:0045005	DNA-dependent DNA replication maintenance of fidelity	28	0.397748	1.2299	0.191589	0.772458	0.745796
GO:0055010	ventricular cardiac muscle tissue morphogenesis	47	0.355331	1.20902	0.191984	0.773072	0.746389
GO:0007141	male meiosis I	20	-0.335003	-1.2073	0.192134	0.773072	0.746389
GO:1903845	negative regulation of cellular response to transforming growth factor beta stimulus	66	0.33336	1.19457	0.192139	0.773072	0.746389
GO:0032963	collagen metabolic process	97	-0.214948	-1.12015	0.192694	0.773558	0.746858
GO:0089718	amino acid import across plasma membrane	18	0.443043	1.24186	0.192768	0.773558	0.746858
GO:0006829	zinc ion transport	22	0.421005	1.2359	0.192785	0.773558	0.746858
GO:0061082	myeloid leukocyte cytokine production	21	0.425835	1.23708	0.192792	0.773558	0.746858
GO:2000401	regulation of lymphocyte migration	40	-0.268793	-1.16693	0.193059	0.773767	0.747061
GO:0010923	negative regulation of phosphatase activity	90	0.316375	1.17978	0.193121	0.773767	0.747061
GO:2001241	positive regulation of extrinsic apoptotic signaling pathway in absence of ligand	11	0.505677	1.25051	0.193242	0.773767	0.747061
GO:0034101	erythrocyte homeostasis	108	0.307908	1.17145	0.193475	0.774168	0.747447
GO:0032401	establishment of melanosome localization	24	0.411699	1.23205	0.193616	0.774199	0.747478
GO:0003007	heart morphogenesis	213	0.283449	1.13737	0.194298	0.776015	0.74923
GO:0007269	neurotransmitter secretion	128	0.30057	1.1622	0.194562	0.776015	0.74923
GO:0099643	signal release from synapse	128	0.30057	1.1622	0.194562	0.776015	0.74923
GO:1904589	regulation of protein import	52	0.34778	1.20263	0.194759	0.776015	0.74923
GO:0003183	mitral valve morphogenesis	10	0.518593	1.24911	0.194784	0.776015	0.74923
GO:0001701	in utero embryonic development	278	0.276213	1.12348	0.19487	0.776015	0.74923
GO:0051409	response to nitrosative stress	10	0.518422	1.2487	0.195136	0.776544	0.749742
GO:0032869	cellular response to insulin stimulus	185	0.2875	1.14377	0.195511	0.77669	0.749883
GO:0120031	plasma membrane bounded cell projection assembly	483	0.264485	1.0968	0.195513	0.77669	0.749883
GO:0031646	positive regulation of neurological system process	19	0.435884	1.23745	0.195573	0.77669	0.749883
GO:0006414	translational elongation	122	0.30227	1.16362	0.195787	0.777008	0.75019
GO:0050765	negative regulation of phagocytosis	15	0.463305	1.24195	0.196376	0.778484	0.751615
GO:2001273	regulation of glucose import in response to insulin stimulus	19	0.435546	1.23649	0.196439	0.778484	0.751615
GO:0031497	chromatin assembly	126	0.300847	1.16156	0.19656	0.778484	0.751615
GO:0046545	development of primary female sexual characteristics	88	0.316676	1.17798	0.196965	0.778805	0.751925
GO:0006984	ER-nucleus signaling pathway	44	-0.260777	-1.1581	0.197038	0.778805	0.751925
GO:0042159	lipoprotein catabolic process	13	0.481375	1.24412	0.197042	0.778805	0.751925
GO:0046661	male sex differentiation	135	0.298093	1.15801	0.197191	0.778863	0.75198
GO:0050954	sensory perception of mechanical stimulus	141	0.296423	1.1557	0.197409	0.779118	0.752227
GO:0051403	stress-activated MAPK cascade	226	0.281221	1.13215	0.1976	0.779118	0.752227
GO:0051051	negative regulation of transport	387	0.268485	1.10598	0.197764	0.779118	0.752227
GO:0010469	regulation of signaling receptor activity	424	0.266722	1.10188	0.197791	0.779118	0.752227
GO:0006206	pyrimidine nucleobase metabolic process	15	0.46262	1.24011	0.198055	0.779602	0.752694
GO:0030201	heparan sulfate proteoglycan metabolic process	27	0.398893	1.22393	0.198181	0.779602	0.752694
GO:0060193	positive regulation of lipase activity	52	0.346845	1.1994	0.198407	0.779962	0.753042
GO:0034975	protein folding in endoplasmic reticulum	14	-0.376845	-1.21585	0.198931	0.781496	0.754522
GO:0051897	positive regulation of protein kinase B signaling	123	0.301321	1.16081	0.199289	0.782374	0.75537
GO:0030852	regulation of granulocyte differentiation	14	0.470638	1.24014	0.19983	0.783899	0.756842
GO:1903020	positive regulation of glycoprotein metabolic process	19	0.434239	1.23278	0.199963	0.783899	0.756842
GO:0090066	regulation of anatomical structure size	432	0.266113	1.09999	0.200144	0.783899	0.756842
GO:0072311	glomerular epithelial cell differentiation	16	0.454065	1.23682	0.200216	0.783899	0.756842
GO:0014033	neural crest cell differentiation	73	0.325751	1.18341	0.200703	0.785276	0.758172
GO:0007254	JNK cascade	175	0.288418	1.14308	0.200869	0.7854	0.758292
GO:0072091	regulation of stem cell proliferation	55	0.342375	1.1944	0.201134	0.78575	0.75863
GO:1900006	positive regulation of dendrite development	58	0.338967	1.19213	0.201294	0.78575	0.75863
GO:0097201	negative regulation of transcription from RNA polymerase II promoter in response to stress	12	-0.398368	-1.22044	0.201364	0.78575	0.75863
GO:0007339	binding of sperm to zona pellucida	28	0.39445	1.2197	0.201618	0.786116	0.758983
GO:0030641	regulation of cellular pH	84	0.317989	1.17617	0.201932	0.786116	0.758983
GO:0010569	regulation of double-strand break repair via homologous recombination	27	0.397629	1.22005	0.201979	0.786116	0.758983
GO:0090153	regulation of sphingolipid biosynthetic process	12	-0.398008	-1.21933	0.202268	0.786116	0.758983
GO:1905038	regulation of membrane lipid metabolic process	12	-0.398008	-1.21933	0.202268	0.786116	0.758983
GO:2000303	regulation of ceramide biosynthetic process	12	-0.398008	-1.21933	0.202268	0.786116	0.758983
GO:0019369	arachidonic acid metabolic process	42	-0.263305	-1.15625	0.202563	0.786738	0.759583
GO:0036109	alpha-linolenic acid metabolic process	12	0.48936	1.23863	0.202859	0.787363	0.760187
GO:0071526	semaphorin-plexin signaling pathway	31	0.384783	1.21434	0.20338	0.787886	0.760692
GO:0098877	neurotransmitter receptor transport to plasma membrane	11	0.501168	1.23936	0.203478	0.787886	0.760692
GO:0031468	nuclear envelope reassembly	18	0.438819	1.23002	0.203965	0.787886	0.760692
GO:2000352	negative regulation of endothelial cell apoptotic process	25	0.404152	1.22015	0.204423	0.787886	0.760692
GO:1902306	negative regulation of sodium ion transmembrane transport	13	0.47818	1.23586	0.20462	0.787886	0.760692
GO:0051446	positive regulation of meiotic cell cycle	12	0.488552	1.23659	0.204719	0.787886	0.760692
GO:0051444	negative regulation of ubiquitin-protein transferase activity	13	0.478112	1.23568	0.204768	0.787886	0.760692
GO:0061037	negative regulation of cartilage development	22	0.416597	1.22295	0.205171	0.787886	0.760692
GO:0031397	negative regulation of protein ubiquitination	59	0.336934	1.18795	0.205307	0.787886	0.760692
GO:0010906	regulation of glucose metabolic process	83	0.317793	1.17373	0.205427	0.787886	0.760692
GO:0030514	negative regulation of BMP signaling pathway	40	0.363371	1.20258	0.205628	0.787886	0.760692
GO:0051895	negative regulation of focal adhesion assembly	15	-0.364902	-1.20422	0.206077	0.787886	0.760692
GO:0030208	dermatan sulfate biosynthetic process	12	0.487872	1.23487	0.20632	0.787886	0.760692
GO:0021514	ventral spinal cord interneuron differentiation	16	-0.356487	-1.20078	0.206341	0.787886	0.760692
GO:0031579	membrane raft organization	20	0.426116	1.22422	0.206457	0.787886	0.760692
GO:0072074	kidney mesenchyme development	18	-0.342157	-1.19506	0.206494	0.787886	0.760692
GO:0072697	protein localization to cell cortex	10	0.513341	1.23646	0.206606	0.787886	0.760692
GO:1901550	regulation of endothelial cell development	10	-0.424628	-1.22136	0.206616	0.787886	0.760692
GO:1903140	regulation of establishment of endothelial barrier	10	-0.424628	-1.22136	0.206616	0.787886	0.760692
GO:0007214	gamma-aminobutyric acid signaling pathway	22	0.415925	1.22098	0.207072	0.787886	0.760692
GO:0035871	protein K11-linked deubiquitination	10	-0.42443	-1.22079	0.207088	0.787886	0.760692
GO:1901685	glutathione derivative metabolic process	19	0.43158	1.22523	0.20716	0.787886	0.760692
GO:1901687	glutathione derivative biosynthetic process	19	0.43158	1.22523	0.20716	0.787886	0.760692
GO:0010921	regulation of phosphatase activity	151	0.292302	1.14599	0.207171	0.787886	0.760692
GO:0006821	chloride transport	92	0.312508	1.16817	0.2072	0.787886	0.760692
GO:0072665	protein localization to vacuole	47	0.351169	1.19486	0.207679	0.787886	0.760692
GO:0070646	protein modification by small protein removal	257	0.276501	1.12061	0.207863	0.787886	0.760692
GO:1990089	response to nerve growth factor	50	0.346864	1.19209	0.208124	0.787886	0.760692
GO:0060343	trabecula formation	23	0.411078	1.21872	0.208156	0.787886	0.760692
GO:0045861	negative regulation of proteolysis	281	0.274313	1.11627	0.208184	0.787886	0.760692
GO:0031668	cellular response to extracellular stimulus	216	0.281082	1.12874	0.208247	0.787886	0.760692
GO:0030449	regulation of complement activation	32	0.38048	1.20821	0.208366	0.787886	0.760692
GO:0002088	lens development in camera-type eye	60	0.335247	1.18493	0.208434	0.787886	0.760692
GO:0002011	morphogenesis of an epithelial sheet	45	0.354013	1.19595	0.20846	0.787886	0.760692
GO:0035337	fatty-acyl-CoA metabolic process	35	0.372929	1.20454	0.208619	0.787886	0.760692
GO:0021696	cerebellar cortex morphogenesis	28	0.39217	1.21265	0.208775	0.787886	0.760692
GO:0051937	catecholamine transport	54	0.341631	1.18853	0.208858	0.787886	0.760692
GO:0016266	O-glycan processing	47	0.35086	1.19381	0.208905	0.787886	0.760692
GO:0051818	disruption of cells of other organism involved in symbiotic interaction	12	-0.39517	-1.21064	0.209109	0.787886	0.760692
GO:0051883	killing of cells in other organism involved in symbiotic interaction	12	-0.39517	-1.21064	0.209109	0.787886	0.760692
GO:0060575	intestinal epithelial cell differentiation	16	-0.355521	-1.19753	0.209263	0.787886	0.760692
GO:0016082	synaptic vesicle priming	15	0.458204	1.22827	0.209416	0.787886	0.760692
GO:1904019	epithelial cell apoptotic process	76	0.32156	1.17438	0.209526	0.787886	0.760692
GO:0043567	regulation of insulin-like growth factor receptor signaling pathway	18	0.436703	1.22409	0.209707	0.787886	0.760692
GO:1901216	positive regulation of neuron death	71	0.32514	1.17693	0.209979	0.787886	0.760692
GO:0001773	myeloid dendritic cell activation	25	0.402309	1.21459	0.21002	0.787886	0.760692
GO:0033045	regulation of sister chromatid segregation	68	0.327489	1.17837	0.210181	0.787886	0.760692
GO:0010934	macrophage cytokine production	13	0.475874	1.2299	0.210258	0.787886	0.760692
GO:0031669	cellular response to nutrient levels	188	0.284761	1.13411	0.210487	0.787886	0.760692
GO:0008038	neuron recognition	30	0.385424	1.20837	0.210498	0.787886	0.760692
GO:0019229	regulation of vasoconstriction	55	-0.243074	-1.13549	0.210597	0.787886	0.760692
GO:0009125	nucleoside monophosphate catabolic process	10	0.511659	1.23241	0.21061	0.787886	0.760692
GO:0098969	neurotransmitter receptor transport to postsynaptic membrane	10	0.511596	1.23226	0.210761	0.787886	0.760692
GO:1903540	establishment of protein localization to postsynaptic membrane	10	0.511596	1.23226	0.210761	0.787886	0.760692
GO:0043154	negative regulation of cysteine-type endopeptidase activity involved in apoptotic process	83	-0.220031	-1.11619	0.210762	0.787886	0.760692
GO:0060445	branching involved in salivary gland morphogenesis	21	0.419345	1.21823	0.210865	0.787886	0.760692
GO:0071241	cellular response to inorganic substance	158	0.290221	1.14178	0.210902	0.787886	0.760692
GO:0006289	nucleotide-excision repair	93	0.311249	1.16504	0.21094	0.787886	0.760692
GO:0048490	anterograde synaptic vesicle transport	16	0.449841	1.22532	0.211249	0.787886	0.760692
GO:0099514	synaptic vesicle cytoskeletal transport	16	0.449841	1.22532	0.211249	0.787886	0.760692
GO:0099517	synaptic vesicle transport along microtubule	16	0.449841	1.22532	0.211249	0.787886	0.760692
GO:0032673	regulation of interleukin-4 production	24	0.405607	1.21382	0.211914	0.789415	0.762169
GO:0048026	positive regulation of mRNA splicing, via spliceosome	14	0.465782	1.22735	0.211971	0.789415	0.762169
GO:0006338	chromatin remodeling	160	0.289607	1.14046	0.212066	0.789415	0.762169
GO:0010634	positive regulation of epithelial cell migration	120	0.299962	1.15296	0.212674	0.791176	0.763868
GO:0060444	branching involved in mammary gland duct morphogenesis	21	0.418597	1.21605	0.212975	0.791684	0.764359
GO:0010842	retina layer formation	21	0.418561	1.21595	0.213083	0.791684	0.764359
GO:0000303	response to superoxide	25	0.401189	1.2112	0.213325	0.792079	0.76474
GO:0031293	membrane protein intracellular domain proteolysis	24	0.405065	1.2122	0.213566	0.792323	0.764976
GO:0050901	leukocyte tethering or rolling	18	-0.339969	-1.18742	0.213663	0.792323	0.764976
GO:0055081	anion homeostasis	40	0.361076	1.19498	0.213908	0.792725	0.765364
GO:0051904	pigment granule transport	24	0.404603	1.21082	0.21499	0.795657	0.768194
GO:0030513	positive regulation of BMP signaling pathway	26	0.396943	1.20839	0.21509	0.795657	0.768194
GO:0008585	female gonad development	83	0.315822	1.16645	0.215109	0.795657	0.768194
GO:0048681	negative regulation of axon regeneration	13	0.47389	1.22477	0.215255	0.795693	0.768229
GO:0031297	replication fork processing	24	0.404422	1.21028	0.215527	0.795859	0.76839
GO:0010894	negative regulation of steroid biosynthetic process	21	-0.322581	-1.17959	0.215723	0.795859	0.76839
GO:0045939	negative regulation of steroid metabolic process	21	-0.322581	-1.17959	0.215723	0.795859	0.76839
GO:0035987	endodermal cell differentiation	42	0.35692	1.19162	0.215969	0.795859	0.76839
GO:1903076	regulation of protein localization to plasma membrane	77	0.319511	1.16891	0.21599	0.795859	0.76839
GO:0036092	phosphatidylinositol-3-phosphate biosynthetic process	45	0.351936	1.18893	0.216239	0.795859	0.76839
GO:0051047	positive regulation of secretion	339	0.269241	1.10394	0.216257	0.795859	0.76839
GO:0042157	lipoprotein metabolic process	166	0.287702	1.13612	0.21656	0.795945	0.768473
GO:2000479	regulation of cAMP-dependent protein kinase activity	15	0.455426	1.22083	0.21661	0.795945	0.768473
GO:1990845	adaptive thermogenesis	14	0.463873	1.22232	0.216691	0.795945	0.768473
GO:0099132	ATP hydrolysis coupled cation transmembrane transport	51	0.343382	1.18378	0.217084	0.796757	0.769257
GO:0045292	mRNA cis splicing, via spliceosome	17	-0.345549	-1.186	0.217185	0.796757	0.769257
GO:1903392	negative regulation of adherens junction organization	16	-0.352842	-1.1885	0.217413	0.796937	0.769431
GO:0033047	regulation of mitotic sister chromatid segregation	59	0.334047	1.17777	0.217508	0.796937	0.769431
GO:0070208	protein heterotrimerization	12	0.483141	1.22289	0.217786	0.796965	0.769458
GO:0071801	regulation of podosome assembly	12	0.483107	1.2228	0.217895	0.796965	0.769458
GO:0035264	multicellular organism growth	134	0.29485	1.14471	0.21802	0.796965	0.769458
GO:0071850	mitotic cell cycle arrest	14	0.463291	1.22078	0.218252	0.796965	0.769458
GO:0050994	regulation of lipid catabolic process	44	0.353001	1.18791	0.218286	0.796965	0.769458
GO:0097186	amelogenesis	17	0.440119	1.21661	0.218351	0.796965	0.769458
GO:0048659	smooth muscle cell proliferation	115	0.300698	1.15111	0.218474	0.796965	0.769458
GO:0010639	negative regulation of organelle organization	309	0.270912	1.10691	0.21883	0.797048	0.769538
GO:0009268	response to pH	40	0.359734	1.19054	0.218839	0.797048	0.769538
GO:0045722	positive regulation of gluconeogenesis	11	0.494631	1.22319	0.218937	0.797048	0.769538
GO:0048384	retinoic acid receptor signaling pathway	29	0.385776	1.20116	0.219045	0.797048	0.769538
GO:0043388	positive regulation of DNA binding	48	0.346755	1.18396	0.219391	0.797567	0.770039
GO:0032488	Cdc42 protein signal transduction	16	0.446701	1.21676	0.219542	0.797567	0.770039
GO:0001953	negative regulation of cell-matrix adhesion	33	-0.278417	-1.15293	0.219598	0.797567	0.770039
GO:0051307	meiotic chromosome separation	15	-0.360168	-1.18859	0.220059	0.798742	0.771174
GO:0045737	positive regulation of cyclin-dependent protein serine/threonine kinase activity	32	0.376874	1.19676	0.220711	0.800463	0.772835
GO:0043113	receptor clustering	44	0.352303	1.18555	0.220915	0.800463	0.772835
GO:0032008	positive regulation of TOR signaling	32	0.376801	1.19653	0.220945	0.800463	0.772835
GO:0070265	necrotic cell death	38	0.362956	1.19028	0.221098	0.800517	0.772887
GO:0001960	negative regulation of cytokine-mediated signaling pathway	47	0.347691	1.18303	0.221334	0.800876	0.773233
GO:0008154	actin polymerization or depolymerization	175	0.285358	1.13095	0.221602	0.801346	0.773688
GO:1902100	negative regulation of metaphase/anaphase transition of cell cycle	30	0.381914	1.19736	0.221954	0.801784	0.77411
GO:0043011	myeloid dendritic cell differentiation	16	0.445772	1.21423	0.221999	0.801784	0.77411
GO:0032370	positive regulation of lipid transport	50	0.34326	1.1797	0.222411	0.802684	0.774979
GO:0036297	interstrand cross-link repair	39	0.360645	1.18811	0.222583	0.802684	0.774979
GO:0030595	leukocyte chemotaxis	151	0.289868	1.13645	0.222743	0.802684	0.774979
GO:0060401	cytosolic calcium ion transport	140	0.292499	1.13976	0.222799	0.802684	0.774979
GO:0045761	regulation of adenylate cyclase activity	31	0.378826	1.19554	0.22299	0.802873	0.775162
GO:0071695	anatomical structure maturation	125	0.296497	1.14393	0.223621	0.804163	0.776408
GO:0071435	potassium ion export	14	0.4612	1.21527	0.223726	0.804163	0.776408
GO:1904874	positive regulation of telomerase RNA localization to Cajal body	15	0.452739	1.21363	0.223762	0.804163	0.776408
GO:0046596	regulation of viral entry into host cell	26	0.39409	1.1997	0.22409	0.804788	0.777011
GO:0046337	phosphatidylethanolamine metabolic process	17	-0.343221	-1.17801	0.224395	0.804788	0.777011
GO:0061371	determination of heart left/right asymmetry	56	0.335613	1.17401	0.224653	0.804788	0.777011
GO:0046426	negative regulation of JAK-STAT cascade	47	0.34686	1.1802	0.224719	0.804788	0.777011
GO:1904893	negative regulation of STAT cascade	47	0.34686	1.1802	0.224719	0.804788	0.777011
GO:0060394	negative regulation of pathway-restricted SMAD protein phosphorylation	10	0.505566	1.21773	0.224979	0.804788	0.777011
GO:0045995	regulation of embryonic development	106	0.302803	1.14977	0.224999	0.804788	0.777011
GO:1903169	regulation of calcium ion transmembrane transport	126	0.295944	1.14263	0.225042	0.804788	0.777011
GO:0003229	ventricular cardiac muscle tissue development	53	0.338772	1.17506	0.225547	0.805308	0.777512
GO:0007271	synaptic transmission, cholinergic	26	0.393626	1.19829	0.225586	0.805308	0.777512
GO:0051341	regulation of oxidoreductase activity	73	0.320288	1.16357	0.225734	0.805308	0.777512
GO:0043266	regulation of potassium ion transport	81	0.314938	1.15959	0.225875	0.805308	0.777512
GO:0070266	necroptotic process	26	0.393537	1.19802	0.225911	0.805308	0.777512
GO:0070374	positive regulation of ERK1 and ERK2 cascade	191	0.282088	1.12454	0.226127	0.805308	0.777512
GO:0045912	negative regulation of carbohydrate metabolic process	34	0.370226	1.18926	0.226156	0.805308	0.777512
GO:0051238	sequestering of metal ion	16	0.443946	1.20926	0.226954	0.807282	0.779419
GO:1903053	regulation of extracellular matrix organization	30	0.380447	1.19276	0.226987	0.807282	0.779419
GO:0030859	polarized epithelial cell differentiation	15	0.451365	1.20994	0.227403	0.808235	0.780339
GO:1902476	chloride transmembrane transport	72	0.320634	1.16274	0.227533	0.808235	0.780339
GO:0015697	quaternary ammonium group transport	12	-0.387723	-1.18783	0.227731	0.808444	0.78054
GO:0051452	intracellular pH reduction	41	0.355579	1.18203	0.227893	0.808526	0.78062
GO:0042573	retinoic acid metabolic process	16	0.443488	1.20801	0.228202	0.808594	0.780685
GO:2000009	negative regulation of protein localization to cell surface	12	-0.38749	-1.18711	0.228358	0.808594	0.780685
GO:0006006	glucose metabolic process	168	0.285542	1.12853	0.22868	0.808594	0.780685
GO:0006900	vesicle budding from membrane	89	0.309811	1.1539	0.228742	0.808594	0.780685
GO:0050830	defense response to Gram-positive bacterium	60	0.33052	1.16822	0.229032	0.808594	0.780685
GO:0010837	regulation of keratinocyte proliferation	27	0.389088	1.19385	0.229075	0.808594	0.780685
GO:1902750	negative regulation of cell cycle G2/M phase transition	86	0.311281	1.15463	0.229186	0.808594	0.780685
GO:0014048	regulation of glutamate secretion	14	0.459046	1.2096	0.22929	0.808594	0.780685
GO:2000679	positive regulation of transcription regulatory region DNA binding	19	0.423663	1.20275	0.229342	0.808594	0.780685
GO:0035090	maintenance of apical/basal cell polarity	10	0.503677	1.21318	0.22945	0.808594	0.780685
GO:0045199	maintenance of epithelial cell apical/basal polarity	10	0.503677	1.21318	0.22945	0.808594	0.780685
GO:0046365	monosaccharide catabolic process	57	0.333393	1.16947	0.229578	0.808594	0.780685
GO:0000079	regulation of cyclin-dependent protein serine/threonine kinase activity	78	0.315977	1.15794	0.229879	0.809163	0.781235
GO:0002027	regulation of heart rate	82	0.313439	1.15595	0.230117	0.809512	0.781572
GO:0014032	neural crest cell development	65	0.325485	1.1639	0.230316	0.809654	0.781708
GO:0043267	negative regulation of potassium ion transport	27	0.388692	1.19263	0.230439	0.809654	0.781708
GO:0046348	amino sugar catabolic process	14	0.458351	1.20777	0.231109	0.809654	0.781708
GO:0008544	epidermis development	336	0.267814	1.09771	0.231118	0.809654	0.781708
GO:0007064	mitotic sister chromatid cohesion	22	0.407782	1.19708	0.231485	0.809654	0.781708
GO:0031123	RNA 3'-end processing	111	-0.2052	-1.09387	0.231495	0.809654	0.781708
GO:0071397	cellular response to cholesterol	12	0.477743	1.20923	0.231551	0.809654	0.781708
GO:1901379	regulation of potassium ion transmembrane transport	65	0.325151	1.1627	0.231807	0.809654	0.781708
GO:0001952	regulation of cell-matrix adhesion	96	0.305779	1.14862	0.232144	0.809654	0.781708
GO:0051881	regulation of mitochondrial membrane potential	59	0.330726	1.16606	0.232174	0.809654	0.781708
GO:0035088	establishment or maintenance of apical/basal cell polarity	43	0.350994	1.17652	0.232375	0.809654	0.781708
GO:0061245	establishment or maintenance of bipolar cell polarity	43	0.350994	1.17652	0.232375	0.809654	0.781708
GO:0007501	mesodermal cell fate specification	13	-0.374682	-1.17956	0.232377	0.809654	0.781708
GO:0007178	transmembrane receptor protein serine/threonine kinase signaling pathway	273	0.27212	1.10591	0.232536	0.809654	0.781708
GO:0070972	protein localization to endoplasmic reticulum	119	0.296893	1.14027	0.232572	0.809654	0.781708
GO:1900221	regulation of amyloid-beta clearance	10	-0.413115	-1.18825	0.232628	0.809654	0.781708
GO:0048566	embryonic digestive tract development	32	0.373364	1.18562	0.232656	0.809654	0.781708
GO:0035308	negative regulation of protein dephosphorylation	45	0.347664	1.1745	0.233154	0.809654	0.781708
GO:0036152	phosphatidylethanolamine acyl-chain remodeling	23	0.402747	1.19402	0.233287	0.809654	0.781708
GO:0061684	chaperone-mediated autophagy	12	0.477055	1.20749	0.233311	0.809654	0.781708
GO:0030810	positive regulation of nucleotide biosynthetic process	59	0.330442	1.16506	0.233462	0.809654	0.781708
GO:1900373	positive regulation of purine nucleotide biosynthetic process	59	0.330442	1.16506	0.233462	0.809654	0.781708
GO:0046349	amino sugar biosynthetic process	12	0.476952	1.20723	0.233598	0.809654	0.781708
GO:0010447	response to acidic pH	21	0.411621	1.19579	0.233642	0.809654	0.781708
GO:2001023	regulation of response to drug	74	0.317891	1.15705	0.233778	0.809654	0.781708
GO:0031589	cell-substrate adhesion	274	0.271889	1.10515	0.233868	0.809654	0.781708
GO:0030205	dermatan sulfate metabolic process	13	0.466602	1.20594	0.233912	0.809654	0.781708
GO:0048711	positive regulation of astrocyte differentiation	13	0.466484	1.20563	0.234204	0.810183	0.782219
GO:0046597	negative regulation of viral entry into host cell	16	0.441198	1.20177	0.234525	0.810811	0.782826
GO:0007131	reciprocal meiotic recombination	37	-0.266421	-1.13554	0.234824	0.810882	0.782895
GO:0035825	homologous recombination	37	-0.266421	-1.13554	0.234824	0.810882	0.782895
GO:2000816	negative regulation of mitotic sister chromatid separation	31	0.37535	1.18457	0.23509	0.81132	0.783317
GO:0045725	positive regulation of glycogen biosynthetic process	13	0.46607	1.20456	0.235284	0.811507	0.783497
GO:0070849	response to epidermal growth factor	42	-0.257158	-1.12926	0.235915	0.812715	0.784664
GO:0050930	induction of positive chemotaxis	13	-0.373402	-1.17554	0.236017	0.812715	0.784664
GO:0045445	myoblast differentiation	72	0.318848	1.15626	0.236053	0.812715	0.784664
GO:0010952	positive regulation of peptidase activity	162	0.285512	1.12546	0.236573	0.814024	0.785928
GO:0070570	regulation of neuron projection regeneration	26	0.390131	1.18765	0.236907	0.814691	0.786572
GO:0046641	positive regulation of alpha-beta T cell proliferation	15	-0.354364	-1.16944	0.237338	0.815209	0.787072
GO:0022600	digestive system process	78	0.314466	1.1524	0.23739	0.815209	0.787072
GO:0061162	establishment of monopolar cell polarity	17	0.433193	1.19747	0.237677	0.815209	0.787072
GO:0070085	glycosylation	228	0.275758	1.11072	0.237689	0.815209	0.787072
GO:0010259	multicellular organism aging	21	0.410289	1.19192	0.237758	0.815209	0.787072
GO:1903362	regulation of cellular protein catabolic process	213	0.277476	1.1134	0.238459	0.815716	0.787561
GO:0035107	appendage morphogenesis	132	0.29203	1.13227	0.23857	0.815716	0.787561
GO:0035108	limb morphogenesis	132	0.29203	1.13227	0.23857	0.815716	0.787561
GO:1903115	regulation of actin filament-based movement	39	0.356387	1.17408	0.238603	0.815716	0.787561
GO:0051491	positive regulation of filopodium assembly	28	0.382995	1.18428	0.238606	0.815716	0.787561
GO:0007528	neuromuscular junction development	44	0.347786	1.17035	0.238863	0.816117	0.787948
GO:0098815	modulation of excitatory postsynaptic potential	38	0.358025	1.17411	0.23944	0.81673	0.788541
GO:2000678	negative regulation of transcription regulatory region DNA binding	19	0.419997	1.19234	0.240138	0.81673	0.788541
GO:0006048	UDP-N-acetylglucosamine biosynthetic process	10	0.49919	1.20238	0.24044	0.81673	0.788541
GO:0048661	positive regulation of smooth muscle cell proliferation	69	0.320191	1.15442	0.240446	0.81673	0.788541
GO:0050433	regulation of catecholamine secretion	40	0.354035	1.17168	0.240694	0.81673	0.788541
GO:0035821	modification of morphology or physiology of other organism	128	0.292769	1.13203	0.240768	0.81673	0.788541
GO:0008037	cell recognition	119	0.295493	1.13489	0.241062	0.81673	0.788541
GO:0031290	retinal ganglion cell axon guidance	19	0.419648	1.19135	0.241117	0.81673	0.788541
GO:0034080	CENP-A containing nucleosome assembly	34	-0.271567	-1.13315	0.241241	0.81673	0.788541
GO:0061641	CENP-A containing chromatin organization	34	-0.271567	-1.13315	0.241241	0.81673	0.788541
GO:0001947	heart looping	52	0.336304	1.16295	0.241249	0.81673	0.788541
GO:0006004	fucose metabolic process	15	-0.353072	-1.16518	0.241354	0.81673	0.788541
GO:0038092	nodal signaling pathway	12	0.473896	1.19949	0.2414	0.81673	0.788541
GO:0000038	very long-chain fatty acid metabolic process	23	0.400193	1.18645	0.241427	0.81673	0.788541
GO:1902667	regulation of axon guidance	35	0.363763	1.17493	0.24161	0.81673	0.788541
GO:0010719	negative regulation of epithelial to mesenchymal transition	25	0.392224	1.18414	0.241645	0.81673	0.788541
GO:0002577	regulation of antigen processing and presentation	15	0.446153	1.19597	0.241702	0.81673	0.788541
GO:0071392	cellular response to estradiol stimulus	32	0.37077	1.17738	0.241887	0.81673	0.788541
GO:0086009	membrane repolarization	43	0.34858	1.16843	0.241942	0.81673	0.788541
GO:0030204	chondroitin sulfate metabolic process	39	0.355516	1.17121	0.241975	0.81673	0.788541
GO:0061213	positive regulation of mesonephros development	17	0.431641	1.19318	0.242059	0.81673	0.788541
GO:0043524	negative regulation of neuron apoptotic process	128	0.29254	1.13115	0.242237	0.81673	0.788541
GO:0043501	skeletal muscle adaptation	18	0.424952	1.19115	0.242772	0.81673	0.788541
GO:0006383	transcription by RNA polymerase III	47	0.342317	1.16474	0.243185	0.81673	0.788541
GO:1905819	negative regulation of chromosome separation	32	0.370415	1.17625	0.2432	0.81673	0.788541
GO:0043405	regulation of MAP kinase activity	306	0.268423	1.09629	0.243409	0.81673	0.788541
GO:0036035	osteoclast development	15	0.445519	1.19427	0.243481	0.81673	0.788541
GO:0007605	sensory perception of sound	127	0.292645	1.13075	0.243658	0.81673	0.788541
GO:0071636	positive regulation of transforming growth factor beta production	16	-0.344566	-1.16063	0.243787	0.81673	0.788541
GO:0000289	nuclear-transcribed mRNA poly(A) tail shortening	35	-0.268928	-1.13036	0.243792	0.81673	0.788541
GO:0000060	protein import into nucleus, translocation	41	0.351437	1.16827	0.243819	0.81673	0.788541
GO:0046949	fatty-acyl-CoA biosynthetic process	27	0.384561	1.17996	0.244191	0.81673	0.788541
GO:0055012	ventricular cardiac muscle cell differentiation	16	0.437756	1.1924	0.244235	0.81673	0.788541
GO:0007620	copulation	16	0.437736	1.19234	0.244292	0.81673	0.788541
GO:0046328	regulation of JNK cascade	149	0.287046	1.12424	0.244306	0.81673	0.788541
GO:0001654	eye development	306	0.268328	1.0959	0.244323	0.81673	0.788541
GO:0033157	regulation of intracellular protein transport	238	0.273859	1.10557	0.244354	0.81673	0.788541
GO:0032988	ribonucleoprotein complex disassembly	12	0.472787	1.19668	0.244377	0.81673	0.788541
GO:0007530	sex determination	20	-0.31981	-1.15255	0.244933	0.81673	0.788541
GO:0001913	T cell mediated cytotoxicity	26	0.387653	1.18011	0.245052	0.81673	0.788541
GO:0097484	dendrite extension	29	0.378086	1.17722	0.245119	0.81673	0.788541
GO:0001832	blastocyst growth	13	0.462312	1.19485	0.245292	0.81673	0.788541
GO:0014910	regulation of smooth muscle cell migration	57	0.329813	1.15691	0.245419	0.81673	0.788541
GO:0010721	negative regulation of cell development	276	0.27042	1.09955	0.245515	0.81673	0.788541
GO:2000010	positive regulation of protein localization to cell surface	11	-0.393396	-1.16956	0.24578	0.81673	0.788541
GO:0061577	calcium ion transmembrane transport via high voltage-gated calcium channel	12	0.472218	1.19524	0.245806	0.81673	0.788541
GO:0032663	regulation of interleukin-2 production	40	-0.258889	-1.12393	0.245839	0.81673	0.788541
GO:0072604	interleukin-6 secretion	28	-0.286926	-1.13725	0.245939	0.81673	0.788541
GO:0031124	mRNA 3'-end processing	82	-0.216597	-1.09604	0.246154	0.81673	0.788541
GO:1905268	negative regulation of chromatin organization	44	-0.252179	-1.11991	0.246249	0.81673	0.788541
GO:0045683	negative regulation of epidermis development	12	0.472016	1.19473	0.246342	0.81673	0.788541
GO:0001738	morphogenesis of a polarized epithelium	121	0.293955	1.13074	0.246361	0.81673	0.788541
GO:0010893	positive regulation of steroid biosynthetic process	10	-0.407351	-1.17167	0.246603	0.81673	0.788541
GO:0046782	regulation of viral transcription	61	0.325738	1.15402	0.246669	0.81673	0.788541
GO:0086004	regulation of cardiac muscle cell contraction	34	0.364581	1.17113	0.246759	0.81673	0.788541
GO:0034109	homotypic cell-cell adhesion	64	0.322737	1.15146	0.247537	0.818005	0.789772
GO:0030041	actin filament polymerization	150	0.286309	1.12193	0.247677	0.818005	0.789772
GO:1990090	cellular response to nerve growth factor stimulus	47	0.34122	1.16101	0.247755	0.818005	0.789772
GO:0060080	inhibitory postsynaptic potential	14	0.452213	1.19159	0.247765	0.818005	0.789772
GO:0043648	dicarboxylic acid metabolic process	96	0.3029	1.13781	0.247846	0.818005	0.789772
GO:0042762	regulation of sulfur metabolic process	17	0.429588	1.1875	0.248121	0.818447	0.790198
GO:0007158	neuron cell-cell adhesion	15	0.443618	1.18918	0.248934	0.818476	0.790226
GO:0071450	cellular response to oxygen radical	22	0.402122	1.18046	0.248948	0.818476	0.790226
GO:0071451	cellular response to superoxide	22	0.402122	1.18046	0.248948	0.818476	0.790226
GO:0060485	mesenchyme development	228	0.274386	1.10519	0.249071	0.818476	0.790226
GO:0051905	establishment of pigment granule localization	25	0.389963	1.17731	0.249117	0.818476	0.790226
GO:0006165	nucleoside diphosphate phosphorylation	99	0.301312	1.13565	0.249536	0.818476	0.790226
GO:0006356	regulation of transcription by RNA polymerase I	28	0.37974	1.17421	0.249667	0.818476	0.790226
GO:0021510	spinal cord development	91	0.304919	1.13846	0.249674	0.818476	0.790226
GO:0043470	regulation of carbohydrate catabolic process	66	0.320491	1.14846	0.250135	0.818476	0.790226
GO:0032373	positive regulation of sterol transport	18	0.422471	1.18419	0.250183	0.818476	0.790226
GO:0032376	positive regulation of cholesterol transport	18	0.422471	1.18419	0.250183	0.818476	0.790226
GO:0036498	IRE1-mediated unfolded protein response	65	0.321298	1.14893	0.25031	0.818476	0.790226
GO:0007091	metaphase/anaphase transition of mitotic cell cycle	48	0.339332	1.15862	0.250316	0.818476	0.790226
GO:0030808	regulation of nucleotide biosynthetic process	129	0.291009	1.12601	0.250468	0.818476	0.790226
GO:1900371	regulation of purine nucleotide biosynthetic process	129	0.291009	1.12601	0.250468	0.818476	0.790226
GO:0042147	retrograde transport, endosome to Golgi	68	0.318879	1.14739	0.250512	0.818476	0.790226
GO:0051092	positive regulation of NF-kappaB transcription factor activity	120	0.293622	1.12859	0.25062	0.818476	0.790226
GO:0032368	regulation of lipid transport	88	0.306217	1.13907	0.25066	0.818476	0.790226
GO:0016322	neuron remodeling	10	0.494932	1.19212	0.250987	0.818654	0.790398
GO:0052548	regulation of endopeptidase activity	332	0.265987	1.08975	0.251126	0.818654	0.790398
GO:0070911	global genome nucleotide-excision repair	26	0.385653	1.17402	0.251737	0.818654	0.790398
GO:0000070	mitotic sister chromatid segregation	139	0.288223	1.12239	0.251852	0.818654	0.790398
GO:0071901	negative regulation of protein serine/threonine kinase activity	121	0.293056	1.12728	0.252046	0.818654	0.790398
GO:0019882	antigen processing and presentation	189	0.278831	1.11085	0.252481	0.818654	0.790398
GO:1901201	regulation of extracellular matrix assembly	14	0.450476	1.18702	0.252503	0.818654	0.790398
GO:0086013	membrane repolarization during cardiac muscle cell action potential	22	0.400976	1.1771	0.252666	0.818654	0.790398
GO:0000002	mitochondrial genome maintenance	24	0.392604	1.17491	0.253047	0.818654	0.790398
GO:0042176	regulation of protein catabolic process	322	0.266382	1.09009	0.253344	0.818654	0.790398
GO:0042228	interleukin-8 biosynthetic process	11	0.480843	1.1891	0.25336	0.818654	0.790398
GO:0009162	deoxyribonucleoside monophosphate metabolic process	12	0.469319	1.1879	0.2534	0.818654	0.790398
GO:0070262	peptidyl-serine dephosphorylation	14	0.450101	1.18603	0.253527	0.818654	0.790398
GO:0043584	nose development	16	-0.341606	-1.15066	0.25357	0.818654	0.790398
GO:0097553	calcium ion transmembrane import into cytosol	114	0.295052	1.12856	0.253698	0.818654	0.790398
GO:0072176	nephric duct development	12	0.469197	1.1876	0.253717	0.818654	0.790398
GO:0070932	histone H3 deacetylation	18	0.421235	1.18073	0.25387	0.818654	0.790398
GO:0010464	regulation of mesenchymal cell proliferation	33	0.364919	1.16568	0.253874	0.818654	0.790398
GO:0021762	substantia nigra development	39	0.352492	1.16125	0.253988	0.818654	0.790398
GO:0000082	G1/S transition of mitotic cell cycle	232	0.273353	1.10206	0.254078	0.818654	0.790398
GO:0060850	regulation of transcription involved in cell fate commitment	16	0.434312	1.18302	0.254276	0.818654	0.790398
GO:1902106	negative regulation of leukocyte differentiation	77	0.311758	1.14055	0.254294	0.818654	0.790398
GO:0042398	cellular modified amino acid biosynthetic process	32	0.367322	1.16643	0.254301	0.818654	0.790398
GO:0048753	pigment granule organization	24	-0.298886	-1.13548	0.254752	0.818654	0.790398
GO:0043046	DNA methylation involved in gamete generation	14	0.44963	1.18479	0.254859	0.818654	0.790398
GO:0006105	succinate metabolic process	12	0.468785	1.18655	0.254867	0.818654	0.790398
GO:1903706	regulation of hemopoiesis	381	0.263072	1.08312	0.254944	0.818654	0.790398
GO:0001881	receptor recycling	31	0.369833	1.16716	0.254947	0.818654	0.790398
GO:0007257	activation of JUN kinase activity	33	-0.271103	-1.12264	0.255561	0.818654	0.790398
GO:0015696	ammonium transport	84	0.307452	1.13719	0.255644	0.818654	0.790398
GO:0034728	nucleosome organization	137	0.288122	1.12072	0.255654	0.818654	0.790398
GO:0031294	lymphocyte costimulation	57	0.327462	1.14867	0.256211	0.818654	0.790398
GO:0031295	T cell costimulation	57	0.327462	1.14867	0.256211	0.818654	0.790398
GO:0090085	regulation of protein deubiquitination	11	0.47972	1.18632	0.256283	0.818654	0.790398
GO:0097720	calcineurin-mediated signaling	25	0.387817	1.17083	0.25649	0.818654	0.790398
GO:0032438	melanosome organization	23	-0.302384	-1.13506	0.257132	0.818654	0.790398
GO:0032780	negative regulation of ATPase activity	13	0.457911	1.18347	0.25718	0.818654	0.790398
GO:0006699	bile acid biosynthetic process	26	0.384057	1.16916	0.257222	0.818654	0.790398
GO:0010715	regulation of extracellular matrix disassembly	15	0.440634	1.18118	0.257222	0.818654	0.790398
GO:0032092	positive regulation of protein binding	80	0.309423	1.1376	0.257237	0.818654	0.790398
GO:0009220	pyrimidine ribonucleotide biosynthetic process	19	0.41432	1.17623	0.257276	0.818654	0.790398
GO:0072538	T-helper 17 type immune response	19	-0.321607	-1.14167	0.257519	0.818654	0.790398
GO:0045851	pH reduction	42	0.346323	1.15624	0.257676	0.818654	0.790398
GO:0001525	angiogenesis	427	0.260951	1.07826	0.257707	0.818654	0.790398
GO:0005996	monosaccharide metabolic process	232	0.272932	1.10037	0.257715	0.818654	0.790398
GO:0010745	negative regulation of macrophage derived foam cell differentiation	12	0.467725	1.18387	0.25775	0.818654	0.790398
GO:0051546	keratinocyte migration	10	0.492165	1.18546	0.25796	0.818654	0.790398
GO:0045686	negative regulation of glial cell differentiation	23	0.39515	1.1715	0.257977	0.818654	0.790398
GO:0046135	pyrimidine nucleoside catabolic process	19	0.414088	1.17557	0.258025	0.818654	0.790398
GO:0060576	intestinal epithelial cell development	11	-0.388865	-1.15609	0.25805	0.818654	0.790398
GO:0060323	head morphogenesis	33	0.363797	1.1621	0.258138	0.818654	0.790398
GO:0043279	response to alkaloid	98	0.300216	1.13033	0.258154	0.818654	0.790398
GO:0045685	regulation of glial cell differentiation	61	0.323155	1.14487	0.258638	0.818654	0.790398
GO:0030193	regulation of blood coagulation	60	0.323957	1.14503	0.258731	0.818654	0.790398
GO:1900046	regulation of hemostasis	60	0.323957	1.14503	0.258731	0.818654	0.790398
GO:0010832	negative regulation of myotube differentiation	13	0.457339	1.182	0.258736	0.818654	0.790398
GO:0046173	polyol biosynthetic process	47	0.33859	1.15206	0.258824	0.818654	0.790398
GO:0046133	pyrimidine ribonucleoside catabolic process	10	-0.402472	-1.15763	0.25887	0.818654	0.790398
GO:0046503	glycerolipid catabolic process	47	0.33853	1.15185	0.259073	0.818717	0.790459
GO:0046785	microtubule polymerization	66	0.318658	1.14189	0.259213	0.818717	0.790459
GO:0002313	mature B cell differentiation involved in immune response	16	0.432542	1.1782	0.259443	0.818717	0.790459
GO:0060272	embryonic skeletal joint morphogenesis	11	0.478492	1.18328	0.259453	0.818717	0.790459
GO:0034405	response to fluid shear stress	32	0.365904	1.16193	0.259621	0.8188	0.790539
GO:0051348	negative regulation of transferase activity	270	0.26927	1.09379	0.260168	0.8188	0.790539
GO:0016569	covalent chromatin modification	416	0.261091	1.07798	0.260409	0.8188	0.790539
GO:2000251	positive regulation of actin cytoskeleton reorganization	17	0.425317	1.17569	0.260672	0.8188	0.790539
GO:0022037	metencephalon development	95	0.301102	1.12974	0.260819	0.8188	0.790539
GO:0051580	regulation of neurotransmitter uptake	16	0.432085	1.17695	0.26083	0.8188	0.790539
GO:0031063	regulation of histone deacetylation	24	0.390134	1.16752	0.261282	0.8188	0.790539
GO:2000725	regulation of cardiac muscle cell differentiation	27	0.379538	1.16455	0.261381	0.8188	0.790539
GO:0010463	mesenchymal cell proliferation	42	0.345403	1.15317	0.261389	0.8188	0.790539
GO:0070302	regulation of stress-activated protein kinase signaling cascade	182	0.278708	1.10758	0.261478	0.8188	0.790539
GO:0043367	CD4-positive, alpha-beta T cell differentiation	55	-0.235653	-1.10082	0.261507	0.8188	0.790539
GO:0060544	regulation of necroptotic process	15	0.439101	1.17707	0.261514	0.8188	0.790539
GO:0046655	folic acid metabolic process	18	0.418727	1.1737	0.261521	0.8188	0.790539
GO:0007173	epidermal growth factor receptor signaling pathway	118	0.292427	1.12224	0.261852	0.8188	0.790539
GO:2000179	positive regulation of neural precursor cell proliferation	40	0.348693	1.154	0.26202	0.8188	0.790539
GO:0006801	superoxide metabolic process	50	0.333972	1.14778	0.262148	0.8188	0.790539
GO:0031065	positive regulation of histone deacetylation	16	0.431434	1.17518	0.262762	0.8188	0.790539
GO:0006333	chromatin assembly or disassembly	150	0.28407	1.11316	0.263451	0.8188	0.790539
GO:1902017	regulation of cilium assembly	37	-0.261284	-1.11365	0.263515	0.8188	0.790539
GO:0098727	maintenance of cell number	144	0.285386	1.11461	0.263556	0.8188	0.790539
GO:0071824	protein-DNA complex subunit organization	230	0.272463	1.09795	0.263626	0.8188	0.790539
GO:0042401	cellular biogenic amine biosynthetic process	20	-0.314973	-1.13512	0.263721	0.8188	0.790539
GO:0050711	negative regulation of interleukin-1 secretion	11	-0.386688	-1.14962	0.263897	0.8188	0.790539
GO:0007044	cell-substrate junction assembly	82	0.307004	1.13222	0.26405	0.8188	0.790539
GO:0032212	positive regulation of telomere maintenance via telomerase	32	0.36466	1.15798	0.264324	0.8188	0.790539
GO:0006516	glycoprotein catabolic process	15	0.438137	1.17448	0.264366	0.8188	0.790539
GO:0030539	male genitalia development	16	0.430843	1.17357	0.264468	0.8188	0.790539
GO:0097028	dendritic cell differentiation	36	0.355701	1.15484	0.264484	0.8188	0.790539
GO:0015698	inorganic anion transport	155	0.282874	1.11126	0.264524	0.8188	0.790539
GO:0040020	regulation of meiotic nuclear division	19	0.412059	1.16981	0.264525	0.8188	0.790539
GO:0048732	gland development	369	0.262739	1.08058	0.264722	0.8188	0.790539
GO:0030511	positive regulation of transforming growth factor beta receptor signaling pathway	25	0.385355	1.1634	0.264843	0.8188	0.790539
GO:1903846	positive regulation of cellular response to transforming growth factor beta stimulus	25	0.385355	1.1634	0.264843	0.8188	0.790539
GO:0030278	regulation of ossification	159	0.282071	1.11021	0.265127	0.8188	0.790539
GO:0042531	positive regulation of tyrosine phosphorylation of STAT protein	53	0.32976	1.1438	0.265203	0.8188	0.790539
GO:0051402	neuron apoptotic process	202	0.27543	1.10183	0.265303	0.8188	0.790539
GO:0006783	heme biosynthetic process	17	0.423729	1.17131	0.265439	0.8188	0.790539
GO:0030071	regulation of mitotic metaphase/anaphase transition	45	0.339891	1.14824	0.265505	0.8188	0.790539
GO:0016446	somatic hypermutation of immunoglobulin genes	13	-0.363411	-1.14408	0.265793	0.8188	0.790539
GO:0046325	negative regulation of glucose import	10	-0.399729	-1.14974	0.26587	0.8188	0.790539
GO:0050819	negative regulation of coagulation	39	0.349464	1.15128	0.266133	0.8188	0.790539
GO:0072075	metanephric mesenchyme development	14	-0.353841	-1.14163	0.266188	0.8188	0.790539
GO:0046470	phosphatidylcholine metabolic process	67	0.316432	1.1363	0.26658	0.8188	0.790539
GO:0034341	response to interferon-gamma	150	0.283622	1.11141	0.266701	0.8188	0.790539
GO:0006882	cellular zinc ion homeostasis	30	0.369204	1.15752	0.266744	0.8188	0.790539
GO:0048144	fibroblast proliferation	74	0.311371	1.13332	0.266842	0.8188	0.790539
GO:0035313	wound healing, spreading of epidermal cells	13	0.454327	1.17421	0.266897	0.8188	0.790539
GO:0003417	growth plate cartilage development	13	-0.362998	-1.14278	0.266968	0.8188	0.790539
GO:0099518	vesicle cytoskeletal trafficking	45	0.33951	1.14696	0.267072	0.8188	0.790539
GO:0009132	nucleoside diphosphate metabolic process	125	0.289552	1.11714	0.267178	0.8188	0.790539
GO:0051583	dopamine uptake involved in synaptic transmission	10	-0.399177	-1.14816	0.267213	0.8188	0.790539
GO:0051934	catecholamine uptake involved in synaptic transmission	10	-0.399177	-1.14816	0.267213	0.8188	0.790539
GO:0090493	catecholamine uptake	10	-0.399177	-1.14816	0.267213	0.8188	0.790539
GO:0090494	dopamine uptake	10	-0.399177	-1.14816	0.267213	0.8188	0.790539
GO:0046854	phosphatidylinositol phosphorylation	87	0.303765	1.12835	0.267214	0.8188	0.790539
GO:0071786	endoplasmic reticulum tubular network organization	15	0.43707	1.17162	0.267388	0.818902	0.790638
GO:0048145	regulation of fibroblast proliferation	73	0.311862	1.13296	0.267765	0.819626	0.791337
GO:0030168	platelet activation	138	0.28606	1.11336	0.267995	0.819898	0.791599
GO:1901623	regulation of lymphocyte chemotaxis	17	0.422742	1.16858	0.268423	0.819925	0.791625
GO:0002479	antigen processing and presentation of exogenous peptide antigen via MHC class I, TAP-dependent	64	0.318331	1.13573	0.268948	0.819925	0.791625
GO:0099622	cardiac muscle cell membrane repolarization	35	0.356467	1.15136	0.269075	0.819925	0.791625
GO:0032611	interleukin-1 beta production	59	-0.230733	-1.09407	0.269108	0.819925	0.791625
GO:0071379	cellular response to prostaglandin stimulus	19	0.410583	1.16562	0.26916	0.819925	0.791625
GO:0090288	negative regulation of cellular response to growth factor stimulus	119	0.291001	1.11764	0.269195	0.819925	0.791625
GO:0001767	establishment of lymphocyte polarity	11	0.47484	1.17425	0.269243	0.819925	0.791625
GO:0050879	multicellular organismal movement	41	0.345184	1.14748	0.269271	0.819925	0.791625
GO:0050881	musculoskeletal movement	41	0.345184	1.14748	0.269271	0.819925	0.791625
GO:1900542	regulation of purine nucleotide metabolic process	166	0.280216	1.10656	0.269587	0.820187	0.791878
GO:2000647	negative regulation of stem cell proliferation	12	0.463313	1.1727	0.269639	0.820187	0.791878
GO:0050999	regulation of nitric-oxide synthase activity	38	0.350226	1.14853	0.270446	0.822056	0.793683
GO:0032965	regulation of collagen biosynthetic process	28	-0.281653	-1.11635	0.270699	0.822056	0.793683
GO:1901292	nucleoside phosphate catabolic process	147	0.283677	1.10979	0.270903	0.822056	0.793683
GO:0030804	positive regulation of cyclic nucleotide biosynthetic process	36	0.354063	1.14952	0.270932	0.822056	0.793683
GO:1901987	regulation of cell cycle phase transition	380	0.26165	1.07716	0.270966	0.822056	0.793683
GO:0050654	chondroitin sulfate proteoglycan metabolic process	40	0.346444	1.14656	0.27111	0.822056	0.793683
GO:0032642	regulation of chemokine production	61	0.320471	1.13536	0.271433	0.822056	0.793683
GO:0046132	pyrimidine ribonucleoside biosynthetic process	18	0.415492	1.16463	0.271544	0.822056	0.793683
GO:0070988	demethylation	57	-0.232223	-1.09315	0.271642	0.822056	0.793683
GO:0099531	presynaptic process involved in chemical synaptic transmission	137	0.285751	1.1115	0.271665	0.822056	0.793683
GO:0051952	regulation of amine transport	68	0.314616	1.13205	0.272002	0.822648	0.794254
GO:0061077	chaperone-mediated protein folding	72	0.311624	1.13007	0.272418	0.822836	0.794435
GO:0052547	regulation of peptidase activity	355	0.26269	1.0789	0.272486	0.822836	0.794435
GO:0051044	positive regulation of membrane protein ectodomain proteolysis	12	-0.371827	-1.13913	0.272545	0.822836	0.794435
GO:0010501	RNA secondary structure unwinding	42	0.342651	1.14398	0.272808	0.822836	0.794435
GO:0010470	regulation of gastrulation	36	0.353553	1.14786	0.272903	0.822836	0.794435
GO:0043393	regulation of protein binding	187	0.27642	1.10048	0.27332	0.822836	0.794435
GO:0051048	negative regulation of secretion	173	0.278539	1.10311	0.273395	0.822836	0.794435
GO:1903391	regulation of adherens junction organization	53	0.327886	1.1373	0.273697	0.822836	0.794435
GO:0033048	negative regulation of mitotic sister chromatid segregation	34	0.357504	1.14839	0.273807	0.822836	0.794435
GO:0060632	regulation of microtubule-based movement	22	-0.30288	-1.12269	0.274218	0.822836	0.794435
GO:0034504	protein localization to nucleus	224	0.27184	1.09388	0.274289	0.822836	0.794435
GO:0032371	regulation of sterol transport	38	0.349284	1.14544	0.274329	0.822836	0.794435
GO:0032374	regulation of cholesterol transport	38	0.349284	1.14544	0.274329	0.822836	0.794435
GO:0000184	nuclear-transcribed mRNA catabolic process, nonsense-mediated decay	108	0.293703	1.11741	0.274373	0.822836	0.794435
GO:0070252	actin-mediated cell contraction	92	0.300088	1.12174	0.274377	0.822836	0.794435
GO:0098760	response to interleukin-7	26	-0.28734	-1.11612	0.274467	0.822836	0.794435
GO:0098761	cellular response to interleukin-7	26	-0.28734	-1.11612	0.274467	0.822836	0.794435
GO:0032922	circadian regulation of gene expression	49	0.332273	1.1382	0.275402	0.824111	0.795666
GO:0046834	lipid phosphorylation	98	0.297313	1.1194	0.275466	0.824111	0.795666
GO:0045652	regulation of megakaryocyte differentiation	63	0.317866	1.13147	0.275478	0.824111	0.795666
GO:2000648	positive regulation of stem cell proliferation	31	0.364239	1.14951	0.275597	0.824111	0.795666
GO:0035050	embryonic heart tube development	67	0.314647	1.12989	0.275721	0.824111	0.795666
GO:0045921	positive regulation of exocytosis	74	0.309702	1.12725	0.275795	0.824111	0.795666
GO:0045672	positive regulation of osteoclast differentiation	17	0.420279	1.16177	0.275883	0.824111	0.795666
GO:0006970	response to osmotic stress	59	0.32133	1.13294	0.276281	0.824277	0.795827
GO:1901658	glycosyl compound catabolic process	33	0.359046	1.14692	0.276322	0.824277	0.795827
GO:0019395	fatty acid oxidation	86	0.302608	1.12246	0.276364	0.824277	0.795827
GO:0043588	skin development	292	0.265913	1.0839	0.276753	0.825017	0.796541
GO:0072347	response to anesthetic	65	0.31595	1.1298	0.277119	0.825077	0.796599
GO:0051709	regulation of killing of cells of other organism	10	-0.395424	-1.13736	0.27731	0.825077	0.796599
GO:0044070	regulation of anion transport	76	0.308106	1.12524	0.277324	0.825077	0.796599
GO:0060603	mammary gland duct morphogenesis	28	0.371963	1.15017	0.27734	0.825077	0.796599
GO:0014031	mesenchymal cell development	69	0.312763	1.12763	0.27802	0.825981	0.797472
GO:0003351	epithelial cilium movement	18	0.413413	1.1588	0.278074	0.825981	0.797472
GO:0031100	animal organ regeneration	68	-0.222169	-1.08466	0.27839	0.825981	0.797472
GO:0010823	negative regulation of mitochondrion organization	45	0.336903	1.13815	0.278399	0.825981	0.797472
GO:0046939	nucleotide phosphorylation	104	0.294492	1.11602	0.278461	0.825981	0.797472
GO:0043010	camera-type eye development	266	0.267569	1.08616	0.278515	0.825981	0.797472
GO:0002763	positive regulation of myeloid leukocyte differentiation	41	0.342911	1.13992	0.278844	0.825981	0.797472
GO:0006658	phosphatidylserine metabolic process	24	0.384899	1.15185	0.279129	0.825981	0.797472
GO:2001025	positive regulation of response to drug	23	-0.297392	-1.11632	0.279485	0.825981	0.797472
GO:0042744	hydrogen peroxide catabolic process	21	0.397269	1.1541	0.279497	0.825981	0.797472
GO:0045776	negative regulation of blood pressure	39	0.346192	1.14049	0.279564	0.825981	0.797472
GO:0010573	vascular endothelial growth factor production	29	-0.277062	-1.10872	0.279621	0.825981	0.797472
GO:0016079	synaptic vesicle exocytosis	78	0.306444	1.123	0.279716	0.825981	0.797472
GO:0034440	lipid oxidation	87	0.301538	1.12008	0.279909	0.825981	0.797472
GO:0009312	oligosaccharide biosynthetic process	31	0.363059	1.14578	0.279962	0.825981	0.797472
GO:0060397	JAK-STAT cascade involved in growth hormone signaling pathway	15	0.432739	1.16001	0.280108	0.825981	0.797472
GO:0060350	endochondral bone morphogenesis	44	0.337798	1.13674	0.280717	0.825981	0.797472
GO:0061971	replacement bone morphogenesis	44	0.337798	1.13674	0.280717	0.825981	0.797472
GO:0043392	negative regulation of DNA binding	50	0.329901	1.13379	0.280805	0.825981	0.797472
GO:0006633	fatty acid biosynthetic process	110	0.291972	1.11279	0.280987	0.825981	0.797472
GO:1902003	regulation of amyloid-beta formation	18	0.412467	1.15615	0.281053	0.825981	0.797472
GO:0042362	fat-soluble vitamin biosynthetic process	11	-0.380646	-1.13166	0.281133	0.825981	0.797472
GO:0046514	ceramide catabolic process	11	-0.380644	-1.13165	0.281144	0.825981	0.797472
GO:0051188	cofactor biosynthetic process	257	0.268	1.08616	0.281268	0.825981	0.797472
GO:1901889	negative regulation of cell junction assembly	19	-0.315444	-1.11979	0.281669	0.825981	0.797472
GO:0030949	positive regulation of vascular endothelial growth factor receptor signaling pathway	15	0.432124	1.15836	0.281864	0.825981	0.797472
GO:0017157	regulation of exocytosis	162	0.279258	1.10081	0.281948	0.825981	0.797472
GO:0022617	extracellular matrix disassembly	87	0.301181	1.11875	0.282008	0.825981	0.797472
GO:0002431	Fc receptor mediated stimulatory signaling pathway	77	0.3066	1.12168	0.282046	0.825981	0.797472
GO:0006415	translational termination	94	0.297925	1.11645	0.282055	0.825981	0.797472
GO:0030318	melanocyte differentiation	22	0.392023	1.15082	0.282056	0.825981	0.797472
GO:0033137	negative regulation of peptidyl-serine phosphorylation	23	0.387909	1.15003	0.2823	0.825981	0.797472
GO:0050862	positive regulation of T cell receptor signaling pathway	11	-0.380231	-1.13042	0.282377	0.825981	0.797472
GO:0060055	angiogenesis involved in wound healing	17	-0.326615	-1.12102	0.282601	0.825981	0.797472
GO:1904018	positive regulation of vasculature development	162	0.279167	1.10045	0.28261	0.825981	0.797472
GO:0051099	positive regulation of binding	152	0.28092	1.10191	0.283393	0.827379	0.798822
GO:0086011	membrane repolarization during action potential	25	0.379977	1.14716	0.283727	0.827379	0.798822
GO:1901070	guanosine-containing compound biosynthetic process	13	0.448355	1.15878	0.283733	0.827379	0.798822
GO:0060396	growth hormone receptor signaling pathway	22	0.391473	1.1492	0.283797	0.827379	0.798822
GO:0032509	endosome transport via multivesicular body sorting pathway	15	0.431442	1.15654	0.283799	0.827379	0.798822
GO:0031055	chromatin remodeling at centromere	35	-0.261771	-1.10028	0.284268	0.828285	0.799697
GO:0003143	embryonic heart tube morphogenesis	58	0.320533	1.1273	0.284494	0.828285	0.799697
[truncated: 3,823 more rows]

## Sheet: continuous - sva
ID	Description	setSize	enrichmentScore	NES	pvalue	p.adjust	qvalues
GO:0045898	regulation of RNA polymerase II transcriptional preinitiation complex assembly	14	-0.713135	-2.17794	0.000255957	0.791103	0.784109
GO:0045899	positive regulation of RNA polymerase II transcriptional preinitiation complex assembly	11	-0.761276	-2.1514	0.000300441	0.791103	0.784109
GO:0099565	chemical synaptic transmission, postsynaptic	111	0.397871	1.64771	0.00105619	0.791103	0.784109
GO:0051443	positive regulation of ubiquitin-protein transferase activity	24	0.592094	1.84111	0.00129718	0.791103	0.784109
GO:0060078	regulation of postsynaptic membrane potential	116	0.389609	1.6229	0.00136494	0.791103	0.784109
GO:0043583	ear development	188	-0.270506	-1.47334	0.00138961	0.791103	0.784109
GO:0048839	inner ear development	164	-0.280155	-1.4973	0.00152627	0.791103	0.784109
GO:0050432	catecholamine secretion	43	0.497022	1.75558	0.00185875	0.791103	0.784109
GO:0060079	excitatory postsynaptic potential	95	0.404381	1.63834	0.00190204	0.791103	0.784109
GO:0007274	neuromuscular synaptic transmission	23	0.588658	1.81213	0.00201188	0.791103	0.784109
GO:0034315	regulation of Arp2/3 complex-mediated actin nucleation	15	0.661634	1.82646	0.00202679	0.791103	0.784109
GO:0010894	negative regulation of steroid biosynthetic process	21	-0.558651	-1.92791	0.00211351	0.791103	0.784109
GO:0045939	negative regulation of steroid metabolic process	21	-0.558651	-1.92791	0.00211351	0.791103	0.784109
GO:0046606	negative regulation of centrosome cycle	13	0.681712	1.81028	0.0026284	0.791103	0.784109
GO:0043488	regulation of mRNA stability	139	-0.283915	-1.48169	0.00318966	0.791103	0.784109
GO:0006733	oxidoreduction coenzyme metabolic process	160	0.347965	1.50718	0.00369052	0.791103	0.784109
GO:0072524	pyridine-containing compound metabolic process	149	0.353407	1.51839	0.00374246	0.791103	0.784109
GO:0006833	water transport	17	0.620835	1.77151	0.00383157	0.791103	0.784109
GO:0042471	ear morphogenesis	105	-0.305521	-1.52385	0.0039689	0.791103	0.784109
GO:0050433	regulation of catecholamine secretion	40	0.487201	1.69585	0.00408529	0.791103	0.784109
GO:0051952	regulation of amine transport	68	0.423175	1.62638	0.00413356	0.791103	0.784109
GO:0071383	cellular response to steroid hormone stimulus	236	0.32044	1.44229	0.00418213	0.791103	0.784109
GO:0070979	protein K11-linked ubiquitination	24	0.560614	1.74322	0.00424898	0.791103	0.784109
GO:0035358	regulation of peroxisome proliferator activated receptor signaling pathway	10	0.712588	1.75658	0.00453296	0.791103	0.784109
GO:0045618	positive regulation of keratinocyte differentiation	13	0.661553	1.75675	0.0048868	0.791103	0.784109
GO:0055012	ventricular cardiac muscle cell differentiation	16	-0.586323	-1.86675	0.00496251	0.791103	0.784109
GO:0042472	inner ear morphogenesis	87	-0.317295	-1.52974	0.0054815	0.791103	0.784109
GO:0007638	mechanosensory behavior	12	-0.645023	-1.87609	0.00552517	0.791103	0.784109
GO:0051193	regulation of cofactor metabolic process	89	0.389968	1.56479	0.0056036	0.791103	0.784109
GO:0001913	T cell mediated cytotoxicity	26	0.538272	1.70537	0.00594528	0.791103	0.784109
GO:0014046	dopamine secretion	23	0.556939	1.71449	0.0060892	0.791103	0.784109
GO:0014059	regulation of dopamine secretion	23	0.556939	1.71449	0.0060892	0.791103	0.784109
GO:1902043	positive regulation of extrinsic apoptotic signaling pathway via death domain receptors	14	0.640186	1.73511	0.00617957	0.791103	0.784109
GO:0006165	nucleoside diphosphate phosphorylation	99	0.377665	1.53925	0.00644529	0.791103	0.784109
GO:0019362	pyridine nucleotide metabolic process	145	0.346865	1.48555	0.00645416	0.791103	0.784109
GO:0046496	nicotinamide nucleotide metabolic process	145	0.346865	1.48555	0.00645416	0.791103	0.784109
GO:0046939	nucleotide phosphorylation	104	0.372218	1.52756	0.00681096	0.791103	0.784109
GO:0043268	positive regulation of potassium ion transport	38	0.479215	1.65047	0.00727006	0.791103	0.784109
GO:0042749	regulation of circadian sleep/wake cycle	19	0.581097	1.70683	0.00739577	0.791103	0.784109
GO:0030522	intracellular receptor signaling pathway	253	0.308468	1.39651	0.00780029	0.791103	0.784109
GO:0042326	negative regulation of phosphorylation	416	0.284148	1.33025	0.0078396	0.791103	0.784109
GO:0042509	regulation of tyrosine phosphorylation of STAT protein	63	0.416985	1.58188	0.00792491	0.791103	0.784109
GO:0042044	fluid transport	24	0.541682	1.68435	0.00796035	0.791103	0.784109
GO:0051196	regulation of coenzyme metabolic process	77	0.396107	1.5535	0.00822121	0.791103	0.784109
GO:0014047	glutamate secretion	38	0.475679	1.63829	0.00824651	0.791103	0.784109
GO:0009132	nucleoside diphosphate metabolic process	125	0.352675	1.48326	0.00876978	0.791103	0.784109
GO:0001767	establishment of lymphocyte polarity	11	0.669519	1.69629	0.00898002	0.791103	0.784109
GO:0086011	membrane repolarization during action potential	25	0.531708	1.66929	0.0089875	0.791103	0.784109
GO:0098693	regulation of synaptic vesicle cycle	41	0.463044	1.61986	0.00904494	0.791103	0.784109
GO:0050806	positive regulation of synaptic transmission	139	0.344141	1.46643	0.00911607	0.791103	0.784109
GO:0030811	regulation of nucleotide catabolic process	62	0.415103	1.57037	0.00922751	0.791103	0.784109
GO:0036297	interstrand cross-link repair	39	0.468111	1.62086	0.00959645	0.791103	0.784109
GO:0030521	androgen receptor signaling pathway	64	0.410177	1.55997	0.00983174	0.791103	0.784109
GO:0050730	regulation of peptidyl-tyrosine phosphorylation	200	0.318421	1.41145	0.010066	0.791103	0.784109
GO:0050731	positive regulation of peptidyl-tyrosine phosphorylation	148	0.337696	1.44976	0.0100705	0.791103	0.784109
GO:0051953	negative regulation of amine transport	21	0.554285	1.66914	0.0101193	0.791103	0.784109
GO:0046885	regulation of hormone biosynthetic process	21	0.553968	1.66818	0.0102392	0.791103	0.784109
GO:0030518	intracellular steroid hormone receptor signaling pathway	125	0.349756	1.47099	0.0103091	0.791103	0.784109
GO:0046434	organophosphate catabolic process	191	0.32056	1.41456	0.0103572	0.791103	0.784109
GO:0006091	generation of precursor metabolites and energy	416	0.280899	1.31504	0.0106153	0.791103	0.784109
GO:0043470	regulation of carbohydrate catabolic process	66	0.404916	1.54811	0.0106208	0.791103	0.784109
GO:0010996	response to auditory stimulus	21	-0.499642	-1.72427	0.0107542	0.791103	0.784109
GO:0007200	phospholipase C-activating G-protein coupled receptor signaling pathway	90	0.375448	1.50903	0.0108362	0.791103	0.784109
GO:0070542	response to fatty acid	72	0.396355	1.53768	0.0108975	0.791103	0.784109
GO:0071396	cellular response to lipid	497	0.273717	1.29282	0.0110137	0.791103	0.784109
GO:0032230	positive regulation of synaptic transmission, GABAergic	12	0.645552	1.67635	0.0110946	0.791103	0.784109
GO:0051438	regulation of ubiquitin-protein transferase activity	40	0.46006	1.60137	0.0112733	0.791103	0.784109
GO:0061512	protein localization to cilium	32	-0.424566	-1.64113	0.011375	0.791103	0.784109
GO:0055015	ventricular cardiac muscle cell development	11	-0.632812	-1.78835	0.0114362	0.791103	0.784109
GO:0015800	acidic amino acid transport	56	0.420502	1.56206	0.0115937	0.791103	0.784109
GO:0050909	sensory perception of taste	50	0.433215	1.57565	0.01161	0.791103	0.784109
GO:0051937	catecholamine transport	54	0.423852	1.5641	0.0118602	0.791103	0.784109
GO:0010499	proteasomal ubiquitin-independent protein catabolic process	17	-0.535318	-1.73647	0.0120784	0.791103	0.784109
GO:0042752	regulation of circadian rhythm	87	0.375815	1.50268	0.0121575	0.791103	0.784109
GO:0001768	establishment of T cell polarity	10	0.675194	1.6644	0.012183	0.791103	0.784109
GO:0043487	regulation of RNA stability	147	-0.258885	-1.36206	0.0127568	0.791103	0.784109
GO:0007260	tyrosine phosphorylation of STAT protein	64	0.403556	1.53479	0.0129617	0.791103	0.784109
GO:0001974	blood vessel remodeling	36	-0.401536	-1.59966	0.0133309	0.791103	0.784109
GO:0010970	transport along microtubule	131	0.341089	1.44295	0.0134306	0.791103	0.784109
GO:0099111	microtubule-based transport	131	0.341089	1.44295	0.0134306	0.791103	0.784109
GO:1901626	regulation of postsynaptic membrane organization	11	0.653362	1.65535	0.0134794	0.791103	0.784109
GO:0034404	nucleobase-containing small molecule biosynthetic process	183	0.31895	1.4014	0.0135345	0.791103	0.784109
GO:0051156	glucose 6-phosphate metabolic process	26	0.512413	1.62344	0.0136219	0.791103	0.784109
GO:2000291	regulation of myoblast proliferation	15	0.597574	1.64962	0.01385	0.791103	0.784109
GO:0002577	regulation of antigen processing and presentation	15	0.596808	1.64751	0.0141255	0.791103	0.784109
GO:0001933	negative regulation of protein phosphorylation	382	0.281212	1.3103	0.0141468	0.791103	0.784109
GO:0048167	regulation of synaptic plasticity	158	0.326878	1.41386	0.0143787	0.791103	0.784109
GO:0031572	G2 DNA damage checkpoint	29	0.494556	1.60627	0.0144486	0.791103	0.784109
GO:0060260	regulation of transcription initiation from RNA polymerase II promoter	28	-0.436942	-1.63176	0.0146348	0.791103	0.784109
GO:0050804	modulation of chemical synaptic transmission	311	0.289531	1.33135	0.0149395	0.791103	0.784109
GO:0099177	regulation of trans-synaptic signaling	311	0.289531	1.33135	0.0149395	0.791103	0.784109
GO:0036507	protein demannosylation	22	0.533226	1.62399	0.0150054	0.791103	0.784109
GO:0036508	protein alpha-1,2-demannosylation	22	0.533226	1.62399	0.0150054	0.791103	0.784109
GO:0071242	cellular response to ammonium ion	52	0.421097	1.54292	0.015337	0.791103	0.784109
GO:1904892	regulation of STAT cascade	124	0.342739	1.44001	0.0154104	0.791103	0.784109
GO:0007191	adenylate cyclase-activating dopamine receptor signaling pathway	10	0.664766	1.6387	0.0155729	0.791103	0.784109
GO:0015837	amine transport	73	0.38648	1.50266	0.0156442	0.791103	0.784109
GO:0042402	cellular biogenic amine catabolic process	20	0.546214	1.62501	0.0158059	0.791103	0.784109
GO:0023058	adaptation of signaling pathway	16	-0.535062	-1.70354	0.0159791	0.791103	0.784109
GO:0042391	regulation of membrane potential	389	0.278885	1.30078	0.0161726	0.791103	0.784109
GO:0048488	synaptic vesicle endocytosis	37	0.458463	1.57046	0.0163188	0.791103	0.784109
GO:1903578	regulation of ATP metabolic process	80	0.376314	1.48522	0.016511	0.791103	0.784109
GO:0051656	establishment of organelle localization	407	0.276795	1.29432	0.0165368	0.791103	0.784109
GO:0045747	positive regulation of Notch signaling pathway	42	-0.373782	-1.54571	0.0165609	0.791103	0.784109
GO:0051348	negative regulation of transferase activity	270	0.294538	1.34042	0.0167076	0.791103	0.784109
GO:0002526	acute inflammatory response	121	0.34285	1.43589	0.0167133	0.791103	0.784109
GO:0006855	drug transmembrane transport	74	-0.309328	-1.44669	0.0167623	0.791103	0.784109
GO:0071320	cellular response to cAMP	47	0.429247	1.54287	0.0169771	0.791103	0.784109
GO:0046633	alpha-beta T cell proliferation	21	0.535667	1.61307	0.0170132	0.791103	0.784109
GO:1903421	regulation of synaptic vesicle recycling	14	0.601956	1.63149	0.0170148	0.791103	0.784109
GO:0071901	negative regulation of protein serine/threonine kinase activity	121	0.342424	1.4341	0.0170451	0.791103	0.784109
GO:0034314	Arp2/3 complex-mediated actin nucleation	31	0.479786	1.58204	0.017138	0.791103	0.784109
GO:0051983	regulation of chromosome segregation	88	0.366838	1.46949	0.0173222	0.791103	0.784109
GO:0017121	phospholipid scrambling	10	0.659976	1.62689	0.017416	0.791103	0.784109
GO:0001502	cartilage condensation	16	0.577656	1.62213	0.0175586	0.791103	0.784109
GO:0043401	steroid hormone mediated signaling pathway	172	0.318091	1.38869	0.0176471	0.791103	0.784109
GO:0001941	postsynaptic membrane organization	33	0.47058	1.57316	0.0177107	0.791103	0.784109
GO:0086013	membrane repolarization during cardiac muscle cell action potential	22	0.527148	1.60548	0.0177111	0.791103	0.784109
GO:0035904	aorta development	49	-0.352561	-1.51134	0.0177953	0.791103	0.784109
GO:0051188	cofactor biosynthetic process	257	0.295936	1.34148	0.0178877	0.791103	0.784109
GO:0009310	amine catabolic process	22	0.526587	1.60377	0.0179599	0.791103	0.784109
GO:0006739	NADP metabolic process	34	0.46593	1.56766	0.0179785	0.791103	0.784109
GO:0034695	response to prostaglandin E	21	0.533354	1.60611	0.0180557	0.791103	0.784109
GO:0031223	auditory behavior	10	-0.630606	-1.72758	0.018143	0.791103	0.784109
GO:0016053	organic acid biosynthetic process	351	0.281578	1.30527	0.0183131	0.791103	0.784109
GO:0010826	negative regulation of centrosome duplication	11	0.639929	1.62132	0.0183238	0.791103	0.784109
GO:0072525	pyridine-containing compound biosynthetic process	112	0.346498	1.4367	0.0184085	0.791103	0.784109
GO:0006096	glycolytic process	85	0.368071	1.46658	0.0185727	0.791103	0.784109
GO:0090051	negative regulation of cell migration involved in sprouting angiogenesis	17	-0.515656	-1.67269	0.0186024	0.791103	0.784109
GO:0043124	negative regulation of I-kappaB kinase/NF-kappaB signaling	42	-0.370165	-1.53076	0.0186271	0.791103	0.784109
GO:0033137	negative regulation of peptidyl-serine phosphorylation	23	0.518786	1.59704	0.0187149	0.791103	0.784109
GO:0001914	regulation of T cell mediated cytotoxicity	20	0.539513	1.60507	0.0187895	0.791103	0.784109
GO:0045187	regulation of circadian sleep/wake cycle, sleep	18	0.555867	1.60991	0.0188563	0.791103	0.784109
GO:0045646	regulation of erythrocyte differentiation	43	0.435433	1.53804	0.0190819	0.791103	0.784109
GO:0051004	regulation of lipoprotein lipase activity	16	0.574392	1.61296	0.0191037	0.791103	0.784109
GO:0006109	regulation of carbohydrate metabolic process	152	0.324246	1.39631	0.0191409	0.791103	0.784109
GO:0045606	positive regulation of epidermal cell differentiation	20	0.538711	1.60269	0.0191849	0.791103	0.784109
GO:1904707	positive regulation of vascular smooth muscle cell proliferation	23	-0.458456	-1.62329	0.0192102	0.791103	0.784109
GO:0048260	positive regulation of receptor-mediated endocytosis	41	0.440835	1.54216	0.0192225	0.791103	0.784109
GO:0006110	regulation of glycolytic process	58	0.402855	1.5062	0.0194426	0.791103	0.784109
GO:0006301	postreplication repair	46	0.427416	1.52974	0.0195167	0.791103	0.784109
GO:0046835	carbohydrate phosphorylation	22	0.523085	1.59311	0.019675	0.791103	0.784109
GO:0060788	ectodermal placode formation	14	0.595223	1.61325	0.019927	0.791103	0.784109
GO:0071697	ectodermal placode morphogenesis	14	0.595223	1.61325	0.019927	0.791103	0.784109
GO:0046640	regulation of alpha-beta T cell proliferation	18	0.553218	1.60224	0.0201549	0.791103	0.784109
GO:0060042	retina morphogenesis in camera-type eye	43	0.433693	1.53189	0.0201675	0.791103	0.784109
GO:0030224	monocyte differentiation	29	0.483116	1.56911	0.0201961	0.791103	0.784109
GO:1903131	mononuclear cell differentiation	29	0.483116	1.56911	0.0201961	0.791103	0.784109
GO:0048643	positive regulation of skeletal muscle tissue development	22	0.521678	1.58882	0.0203936	0.791103	0.784109
GO:0046425	regulation of JAK-STAT cascade	123	0.337385	1.41607	0.0204171	0.791103	0.784109
GO:0042982	amyloid precursor protein metabolic process	47	0.423275	1.5214	0.0207168	0.791103	0.784109
GO:0071435	potassium ion export	14	0.59334	1.60814	0.020814	0.791103	0.784109
GO:0099622	cardiac muscle cell membrane repolarization	35	0.456718	1.54603	0.0212468	0.791103	0.784109
GO:0006757	ATP generation from ADP	86	0.363823	1.45214	0.0212534	0.791103	0.784109
GO:0048243	norepinephrine secretion	15	0.580446	1.60234	0.0212988	0.791103	0.784109
GO:0042531	positive regulation of tyrosine phosphorylation of STAT protein	53	0.409643	1.50641	0.0213154	0.791103	0.784109
GO:0050821	protein stabilization	140	0.327462	1.39666	0.021377	0.791103	0.784109
GO:0071712	ER-associated misfolded protein catabolic process	12	0.617256	1.60287	0.0216304	0.791103	0.784109
GO:1902116	negative regulation of organelle assembly	28	0.485244	1.56362	0.021818	0.791103	0.784109
GO:1904894	positive regulation of STAT cascade	65	0.388553	1.4818	0.0219174	0.791103	0.784109
GO:0098815	modulation of excitatory postsynaptic potential	38	0.445532	1.53446	0.0219702	0.791103	0.784109
GO:0051451	myoblast migration	11	-0.597858	-1.68957	0.0220128	0.791103	0.784109
GO:0046394	carboxylic acid biosynthetic process	350	0.278886	1.29258	0.022608	0.803508	0.796404
GO:0050792	regulation of viral process	179	-0.237727	-1.28597	0.022634	0.803508	0.796404
GO:0010507	negative regulation of autophagy	63	0.389589	1.47796	0.0232231	0.808953	0.8018
GO:0051450	myoblast proliferation	18	0.54699	1.5842	0.023388	0.808953	0.8018
GO:0006636	unsaturated fatty acid biosynthetic process	37	0.446029	1.52787	0.0237455	0.808953	0.8018
GO:0090224	regulation of spindle organization	35	0.452935	1.53322	0.0237495	0.808953	0.8018
GO:2001023	regulation of response to drug	74	0.374293	1.4585	0.0238732	0.808953	0.8018
GO:0060272	embryonic skeletal joint morphogenesis	11	0.627817	1.59063	0.0238988	0.808953	0.8018
GO:0061013	regulation of mRNA catabolic process	156	-0.245199	-1.30103	0.023961	0.808953	0.8018
GO:0016052	carbohydrate catabolic process	153	0.319454	1.37674	0.024082	0.808953	0.8018
GO:1902883	negative regulation of response to oxidative stress	41	0.4336	1.51685	0.0240891	0.808953	0.8018
GO:0010225	response to UV-C	12	-0.57392	-1.66928	0.0241769	0.808953	0.8018
GO:0006094	gluconeogenesis	71	0.377393	1.46052	0.0246345	0.812879	0.805692
GO:0048511	rhythmic process	247	0.292887	1.32333	0.0248939	0.812879	0.805692
GO:0007271	synaptic transmission, cholinergic	26	0.490039	1.55255	0.0249382	0.812879	0.805692
GO:0060359	response to ammonium ion	106	0.343722	1.41439	0.0249714	0.812879	0.805692
GO:0016578	histone deubiquitination	18	0.543959	1.57542	0.0251189	0.812879	0.805692
GO:0086009	membrane repolarization	43	0.426827	1.50764	0.0251646	0.812879	0.805692
GO:0008206	bile acid metabolic process	34	-0.387822	-1.52243	0.0257547	0.812879	0.805692
GO:0071542	dopaminergic neuron differentiation	31	0.465377	1.53452	0.0258282	0.812879	0.805692
GO:0019359	nicotinamide nucleotide biosynthetic process	109	0.3409	1.40819	0.0258516	0.812879	0.805692
GO:0019363	pyridine nucleotide biosynthetic process	109	0.3409	1.40819	0.0258516	0.812879	0.805692
GO:0031346	positive regulation of cell projection organization	315	0.281179	1.29415	0.0260432	0.812879	0.805692
GO:0045736	negative regulation of cyclin-dependent protein serine/threonine kinase activity	27	0.483357	1.54453	0.0260521	0.812879	0.805692
GO:0050995	negative regulation of lipid catabolic process	18	0.542107	1.57006	0.0262496	0.812879	0.805692
GO:0010976	positive regulation of neuron projection development	234	0.294383	1.32402	0.0266943	0.812879	0.805692
GO:0035641	locomotory exploration behavior	13	0.593903	1.57711	0.0270394	0.812879	0.805692
GO:0014061	regulation of norepinephrine secretion	14	0.581392	1.57576	0.0271231	0.812879	0.805692
GO:0042711	maternal behavior	11	0.621729	1.57521	0.0272476	0.812879	0.805692
GO:0006865	amino acid transport	121	0.3319	1.39003	0.0276002	0.812879	0.805692
GO:0097090	presynaptic membrane organization	11	0.620699	1.5726	0.0278424	0.812879	0.805692
GO:0001711	endodermal cell fate commitment	14	0.580082	1.57221	0.0278759	0.812879	0.805692
GO:0001909	leukocyte mediated cytotoxicity	74	0.370024	1.44187	0.0280483	0.812879	0.805692
GO:1904948	midbrain dopaminergic neuron differentiation	13	0.591916	1.57183	0.0282292	0.812879	0.805692
GO:0042866	pyruvate biosynthetic process	89	0.354038	1.42062	0.0282471	0.812879	0.805692
GO:0010839	negative regulation of keratinocyte proliferation	13	-0.547796	-1.63457	0.0283459	0.812879	0.805692
GO:1902230	negative regulation of intrinsic apoptotic signaling pathway in response to DNA damage	29	-0.405854	-1.52966	0.0287455	0.812879	0.805692
GO:0002643	regulation of tolerance induction	13	-0.546953	-1.63205	0.0287475	0.812879	0.805692
GO:0036465	synaptic vesicle recycling	47	0.412629	1.48314	0.0289528	0.812879	0.805692
GO:0050729	positive regulation of inflammatory response	87	0.355146	1.42003	0.0291015	0.812879	0.805692
GO:0006469	negative regulation of protein kinase activity	232	0.293287	1.31809	0.0292812	0.812879	0.805692
GO:0014048	regulation of glutamate secretion	14	0.577683	1.56571	0.0293496	0.812879	0.805692
GO:0060192	negative regulation of lipase activity	14	0.57756	1.56537	0.0294136	0.812879	0.805692
GO:0001956	positive regulation of neurotransmitter secretion	13	0.589609	1.5657	0.0296617	0.812879	0.805692
GO:0070507	regulation of microtubule cytoskeleton organization	151	0.316074	1.36006	0.0296981	0.812879	0.805692
GO:1902882	regulation of response to oxidative stress	74	0.368444	1.43571	0.0297156	0.812879	0.805692
GO:2001235	positive regulation of apoptotic signaling pathway	151	0.315911	1.35936	0.0299107	0.812879	0.805692
GO:1903204	negative regulation of oxidative stress-induced neuron death	14	0.576302	1.56197	0.030174	0.812879	0.805692
GO:0033673	negative regulation of kinase activity	247	0.289702	1.30894	0.0302869	0.812879	0.805692
GO:0060081	membrane hyperpolarization	12	0.600945	1.56052	0.0307482	0.812879	0.805692
GO:0050854	regulation of antigen receptor-mediated signaling pathway	46	0.412798	1.47742	0.0307634	0.812879	0.805692
GO:0015874	norepinephrine transport	19	0.526752	1.5472	0.0307739	0.812879	0.805692
GO:2001044	regulation of integrin-mediated signaling pathway	13	-0.54312	-1.62061	0.0307924	0.812879	0.805692
GO:0044772	mitotic cell cycle phase transition	481	0.263287	1.24171	0.0309415	0.812879	0.805692
GO:0071880	adenylate cyclase-activating adrenergic receptor signaling pathway	21	0.511449	1.54014	0.0310232	0.812879	0.805692
GO:0009306	protein secretion	461	0.264479	1.24486	0.0312773	0.812879	0.805692
GO:0060428	lung epithelium development	31	-0.393117	-1.50715	0.0313056	0.812879	0.805692
GO:0006517	protein deglycosylation	32	0.45409	1.5079	0.0313747	0.812879	0.805692
GO:0001910	regulation of leukocyte mediated cytotoxicity	51	0.401608	1.46628	0.0315431	0.812879	0.805692
GO:0071875	adrenergic receptor signaling pathway	25	0.48564	1.52466	0.032114	0.812879	0.805692
GO:0050667	homocysteine metabolic process	13	-0.540651	-1.61325	0.0321347	0.812879	0.805692
GO:0001516	prostaglandin biosynthetic process	21	0.509587	1.53454	0.0323976	0.812879	0.805692
GO:0046457	prostanoid biosynthetic process	21	0.509587	1.53454	0.0323976	0.812879	0.805692
GO:0042987	amyloid precursor protein catabolic process	32	0.452163	1.5015	0.0329849	0.812879	0.805692
GO:0001916	positive regulation of T cell mediated cytotoxicity	12	0.59746	1.55147	0.0330331	0.812879	0.805692
GO:0008211	glucocorticoid metabolic process	21	0.508645	1.5317	0.0331096	0.812879	0.805692
GO:1903311	regulation of mRNA metabolic process	256	-0.215125	-1.2173	0.0331427	0.812879	0.805692
GO:1904380	endoplasmic reticulum mannose trimming	19	0.523517	1.5377	0.033185	0.812879	0.805692
GO:0036119	response to platelet-derived growth factor	20	0.515614	1.53397	0.0332153	0.812879	0.805692
GO:0036120	cellular response to platelet-derived growth factor stimulus	20	0.515614	1.53397	0.0332153	0.812879	0.805692
GO:0030809	negative regulation of nucleotide biosynthetic process	38	0.431179	1.48502	0.0333895	0.812879	0.805692
GO:1900372	negative regulation of purine nucleotide biosynthetic process	38	0.431179	1.48502	0.0333895	0.812879	0.805692
GO:0061000	negative regulation of dendritic spine development	10	0.628966	1.55045	0.0334036	0.812879	0.805692
GO:0002790	peptide secretion	492	0.261599	1.23503	0.0334449	0.812879	0.805692
GO:0046427	positive regulation of JAK-STAT cascade	64	0.377999	1.43759	0.03345	0.812879	0.805692
GO:0030818	negative regulation of cAMP biosynthetic process	22	0.501347	1.5269	0.0337071	0.812879	0.805692
GO:0043551	regulation of phosphatidylinositol 3-kinase activity	38	0.430221	1.48172	0.0342524	0.812879	0.805692
GO:0072091	regulation of stem cell proliferation	55	0.391317	1.4489	0.0343359	0.812879	0.805692
GO:0060445	branching involved in salivary gland morphogenesis	21	-0.447603	-1.54468	0.0344932	0.812879	0.805692
GO:1902229	regulation of intrinsic apoptotic signaling pathway in response to DNA damage	36	-0.369179	-1.47075	0.0346962	0.812879	0.805692
GO:0002031	G-protein coupled receptor internalization	12	-0.552835	-1.60795	0.0347696	0.812879	0.805692
GO:0007620	copulation	16	0.54796	1.53874	0.0347847	0.812879	0.805692
GO:0045722	positive regulation of gluconeogenesis	11	0.60973	1.5448	0.0348226	0.812879	0.805692
GO:0030813	positive regulation of nucleotide catabolic process	18	0.529548	1.53368	0.0348494	0.812879	0.805692
GO:0009185	ribonucleoside diphosphate metabolic process	109	0.333825	1.37896	0.03485	0.812879	0.805692
GO:0009950	dorsal/ventral axis specification	14	0.569292	1.54297	0.0349561	0.812879	0.805692
GO:0050434	positive regulation of viral transcription	39	-0.358891	-1.4581	0.0350442	0.812879	0.805692
GO:0019319	hexose biosynthetic process	74	0.363884	1.41794	0.0350867	0.812879	0.805692
GO:0098743	cell aggregation	17	0.538003	1.53516	0.0351046	0.812879	0.805692
GO:0046599	regulation of centriole replication	14	0.568945	1.54203	0.0351847	0.812879	0.805692
GO:0036065	fucosylation	27	-0.407353	-1.50697	0.0354222	0.81513	0.807924
GO:0051043	regulation of membrane protein ectodomain proteolysis	20	-0.454009	-1.5451	0.0356013	0.816027	0.808812
GO:0003351	epithelial cilium movement	18	0.528319	1.53013	0.0357558	0.816354	0.809136
GO:0001101	response to acid chemical	292	0.27951	1.27958	0.0360139	0.819035	0.811793
GO:0051125	regulation of actin nucleation	26	0.474737	1.50407	0.0366945	0.823023	0.815746
GO:0042698	ovulation cycle	55	0.389223	1.44115	0.0367614	0.823023	0.815746
GO:0006631	fatty acid metabolic process	307	0.277057	1.27294	0.0369227	0.823023	0.815746
GO:0045773	positive regulation of axon extension	39	0.424505	1.46987	0.0370318	0.823023	0.815746
GO:0032228	regulation of synaptic transmission, GABAergic	28	0.464641	1.49723	0.0370677	0.823023	0.815746
GO:0002335	mature B cell differentiation	19	0.518082	1.52174	0.0373852	0.823023	0.815746
GO:0061298	retina vasculature development in camera-type eye	14	0.565802	1.53351	0.0375087	0.823023	0.815746
GO:0035871	protein K11-linked deubiquitination	10	-0.587306	-1.60895	0.0375272	0.823023	0.815746
GO:0046782	regulation of viral transcription	61	-0.307975	-1.38491	0.0378343	0.823023	0.815746
GO:0097327	response to antineoplastic agent	82	0.353156	1.39921	0.0378349	0.823023	0.815746
GO:0006098	pentose-phosphate shunt	19	0.517441	1.51985	0.0379274	0.823023	0.815746
GO:1901292	nucleoside phosphate catabolic process	147	0.312361	1.33996	0.0383054	0.823023	0.815746
GO:0031579	membrane raft organization	20	0.508242	1.51204	0.0391238	0.823023	0.815746
GO:0007018	microtubule-based movement	278	0.280199	1.27803	0.039204	0.823023	0.815746
GO:0051900	regulation of mitochondrial depolarization	17	0.532567	1.51965	0.039271	0.823023	0.815746
GO:0050715	positive regulation of cytokine secretion	93	0.342299	1.38242	0.039315	0.823023	0.815746
GO:0006487	protein N-linked glycosylation	81	0.352932	1.39571	0.039361	0.823023	0.815746
GO:2001238	positive regulation of extrinsic apoptotic signaling pathway	42	0.414186	1.45601	0.039444	0.823023	0.815746
GO:1900408	negative regulation of cellular response to oxidative stress	39	0.422193	1.46187	0.0394739	0.823023	0.815746
GO:1903202	negative regulation of oxidative stress-induced cell death	39	0.422193	1.46187	0.0394739	0.823023	0.815746
GO:0006521	regulation of cellular amino acid metabolic process	51	-0.32441	-1.40335	0.0395606	0.823023	0.815746
GO:0042753	positive regulation of circadian rhythm	16	0.54169	1.52113	0.0396682	0.823023	0.815746
GO:0071359	cellular response to dsRNA	62	0.375516	1.4206	0.0398929	0.823023	0.815746
GO:0043467	regulation of generation of precursor metabolites and energy	102	0.33525	1.37207	0.0399261	0.823023	0.815746
GO:0009135	purine nucleoside diphosphate metabolic process	107	0.331785	1.36709	0.0399816	0.823023	0.815746
GO:0009179	purine ribonucleoside diphosphate metabolic process	107	0.331785	1.36709	0.0399816	0.823023	0.815746
GO:0006356	regulation of transcription by RNA polymerase I	28	0.461074	1.48573	0.0404595	0.823023	0.815746
GO:0046503	glycerolipid catabolic process	47	0.401357	1.44262	0.040473	0.823023	0.815746
GO:0031398	positive regulation of protein ubiquitination	85	0.348246	1.38759	0.0405092	0.823023	0.815746
GO:0002573	myeloid leukocyte differentiation	162	0.305623	1.32565	0.0405453	0.823023	0.815746
GO:0016574	histone ubiquitination	39	0.421205	1.45844	0.0405715	0.823023	0.815746
GO:0050878	regulation of body fluid levels	420	0.264132	1.23717	0.0408522	0.825839	0.818538
GO:0032786	positive regulation of DNA-templated transcription, elongation	21	-0.438846	-1.51446	0.0411723	0.82943	0.822096
GO:0060456	positive regulation of digestive system process	12	0.586097	1.52196	0.041394	0.831019	0.823672
GO:0035357	peroxisome proliferator activated receptor signaling pathway	17	0.529574	1.51111	0.0417287	0.834861	0.82748
GO:1901381	positive regulation of potassium ion transmembrane transport	31	0.446663	1.47282	0.0418796	0.83501	0.827627
GO:0032370	positive regulation of lipid transport	50	0.393641	1.43171	0.0422888	0.838777	0.831361
GO:0034694	response to prostaglandin	28	0.459018	1.47911	0.0424365	0.838777	0.831361
GO:0010172	embryonic body morphogenesis	11	0.598574	1.51654	0.0430954	0.838777	0.831361
GO:0018108	peptidyl-tyrosine phosphorylation	323	0.272484	1.25625	0.0434196	0.838777	0.831361
GO:0022602	ovulation cycle process	37	0.424543	1.45427	0.0434875	0.838777	0.831361
GO:0009166	nucleotide catabolic process	143	0.311132	1.33037	0.0437223	0.838777	0.831361
GO:0090220	chromosome localization to nuclear envelope involved in homologous chromosome segregation	11	-0.555512	-1.5699	0.0441926	0.838777	0.831361
GO:0009148	pyrimidine nucleoside triphosphate biosynthetic process	17	0.526623	1.50268	0.0443299	0.838777	0.831361
GO:0003222	ventricular trabecula myocardium morphogenesis	16	-0.481299	-1.53237	0.044424	0.838777	0.831361
GO:0045010	actin nucleation	44	0.404654	1.4357	0.0447301	0.838777	0.831361
GO:0051897	positive regulation of protein kinase B signaling	123	-0.249177	-1.27551	0.0447339	0.838777	0.831361
GO:0006066	alcohol metabolic process	274	0.2786	1.26936	0.0448325	0.838777	0.831361
GO:0045078	positive regulation of interferon-gamma biosynthetic process	11	0.596222	1.51058	0.0449922	0.838777	0.831361
GO:0006067	ethanol metabolic process	14	0.556645	1.50869	0.0450035	0.838777	0.831361
GO:0002313	mature B cell differentiation involved in immune response	16	0.535203	1.50292	0.0451625	0.838777	0.831361
GO:0031529	ruffle organization	44	0.404157	1.43394	0.0453533	0.838777	0.831361
GO:0035909	aorta morphogenesis	32	-0.373892	-1.44526	0.0454258	0.838777	0.831361
GO:2000765	regulation of cytoplasmic translation	21	-0.433715	-1.49676	0.0455354	0.838777	0.831361
GO:0006491	N-glycan processing	17	0.525187	1.49859	0.0455513	0.838777	0.831361
GO:0002507	tolerance induction	18	-0.45899	-1.51436	0.0456867	0.838777	0.831361
GO:1901071	glucosamine-containing compound metabolic process	24	0.475788	1.47946	0.0458033	0.838777	0.831361
GO:0048521	negative regulation of behavior	14	0.555728	1.5062	0.0458721	0.838777	0.831361
GO:0046386	deoxyribose phosphate catabolic process	18	0.516007	1.49447	0.0460717	0.838777	0.831361
GO:0050707	regulation of cytokine secretion	138	0.311894	1.32789	0.0463361	0.838777	0.831361
GO:2001169	regulation of ATP biosynthetic process	65	0.36671	1.39849	0.0463407	0.838777	0.831361
GO:0045913	positive regulation of carbohydrate metabolic process	61	0.371758	1.40236	0.0468175	0.838777	0.831361
GO:0050858	negative regulation of antigen receptor-mediated signaling pathway	19	0.50744	1.49048	0.0468611	0.838777	0.831361
GO:0046031	ADP metabolic process	91	0.339007	1.3648	0.046971	0.838777	0.831361
GO:0016242	negative regulation of macroautophagy	26	0.463986	1.47001	0.0469809	0.838777	0.831361
GO:0070071	proton-transporting two-sector ATPase complex assembly	14	-0.503545	-1.53784	0.0470001	0.838777	0.831361
GO:0043476	pigment accumulation	11	-0.551317	-1.55804	0.0471163	0.838777	0.831361
GO:0043482	cellular pigment accumulation	11	-0.551317	-1.55804	0.0471163	0.838777	0.831361
GO:1902902	negative regulation of autophagosome assembly	10	0.610266	1.50435	0.047146	0.838777	0.831361
GO:0060628	regulation of ER to Golgi vesicle-mediated transport	11	0.593482	1.50364	0.0472778	0.838777	0.831361
GO:0072567	chemokine (C-X-C motif) ligand 2 production	10	0.61004	1.5038	0.0473431	0.838777	0.831361
GO:0051648	vesicle localization	238	0.283531	1.27707	0.0473459	0.838777	0.831361
GO:0007520	myoblast fusion	35	0.427273	1.44635	0.0475833	0.838777	0.831361
GO:0046928	regulation of neurotransmitter secretion	50	0.389465	1.41652	0.0477434	0.838777	0.831361
GO:0002791	regulation of peptide secretion	390	0.26438	1.2333	0.047789	0.838777	0.831361
GO:0009755	hormone-mediated signaling pathway	203	0.290709	1.29059	0.0478969	0.838777	0.831361
GO:0060236	regulation of mitotic spindle organization	32	0.437171	1.45172	0.0481525	0.838777	0.831361
GO:0072330	monocarboxylic acid biosynthetic process	248	0.281434	1.27194	0.0482878	0.838777	0.831361
GO:0033604	negative regulation of catecholamine secretion	11	0.59216	1.50029	0.0484628	0.838777	0.831361
GO:0043201	response to leucine	10	0.608716	1.50053	0.0484688	0.838777	0.831361
GO:0045648	positive regulation of erythrocyte differentiation	28	0.453364	1.46089	0.0485517	0.838777	0.831361
GO:1901070	guanosine-containing compound biosynthetic process	13	0.564149	1.49809	0.0487191	0.83918	0.83176
GO:0030803	negative regulation of cyclic nucleotide biosynthetic process	24	0.472816	1.47021	0.0489195	0.840145	0.832717
GO:0019933	cAMP-mediated signaling	124	0.316917	1.33152	0.0492721	0.843712	0.836253
GO:0007088	regulation of mitotic nuclear division	138	0.310196	1.32066	0.0500286	0.846028	0.838548
GO:1900543	negative regulation of purine nucleotide metabolic process	45	0.398259	1.41937	0.0500862	0.846028	0.838548
GO:0070528	protein kinase C signaling	23	0.477237	1.46913	0.0502971	0.846028	0.838548
GO:0072488	ammonium transmembrane transport	13	0.562375	1.49338	0.0503373	0.846028	0.838548
GO:0006875	cellular metal ion homeostasis	464	0.257981	1.21461	0.0505747	0.846028	0.838548
GO:0030705	cytoskeleton-dependent intracellular transport	152	0.304396	1.31082	0.0506404	0.846028	0.838548
GO:0044262	cellular carbohydrate metabolic process	224	0.285	1.27671	0.0507889	0.846028	0.838548
GO:0051307	meiotic chromosome separation	15	-0.485338	-1.51482	0.0511296	0.846028	0.838548
GO:0050732	negative regulation of peptidyl-tyrosine phosphorylation	44	0.399637	1.4179	0.0512312	0.846028	0.838548
GO:0015740	C4-dicarboxylate transport	11	-0.545136	-1.54057	0.0515812	0.846028	0.838548
GO:1902745	positive regulation of lamellipodium organization	21	0.488392	1.47071	0.05168	0.846028	0.838548
GO:0031647	regulation of protein stability	224	0.284676	1.27526	0.051714	0.846028	0.838548
GO:0050855	regulation of B cell receptor signaling pathway	18	0.510095	1.47734	0.0518529	0.846028	0.838548
GO:0060746	parental behavior	12	0.573716	1.48981	0.0519344	0.846028	0.838548
GO:0051383	kinetochore organization	18	0.50986	1.47666	0.0520847	0.846028	0.838548
GO:0050773	regulation of dendrite development	120	0.31764	1.32886	0.0520905	0.846028	0.838548
GO:1901068	guanosine-containing compound metabolic process	50	0.386365	1.40525	0.0521392	0.846028	0.838548
GO:0099624	atrial cardiac muscle cell membrane repolarization	10	0.604392	1.48987	0.0522276	0.846028	0.838548
GO:0007052	mitotic spindle organization	97	0.331433	1.34679	0.0525732	0.846028	0.838548
GO:0044839	cell cycle G2/M phase transition	228	0.283483	1.27206	0.0527173	0.846028	0.838548
GO:0034776	response to histamine	10	0.603638	1.48801	0.0529135	0.846028	0.838548
GO:0086005	ventricular cardiac muscle cell action potential	30	0.441066	1.44375	0.0529914	0.846028	0.838548
GO:0050663	cytokine secretion	158	0.301125	1.30248	0.053078	0.846028	0.838548
GO:0006704	glucocorticoid biosynthetic process	15	0.536484	1.48098	0.0534172	0.846028	0.838548
GO:0015844	monoamine transport	64	0.363324	1.38178	0.0535502	0.846028	0.838548
GO:0050708	regulation of protein secretion	362	0.265204	1.23169	0.0535874	0.846028	0.838548
GO:0045912	negative regulation of carbohydrate metabolic process	34	0.425554	1.43181	0.0538871	0.846028	0.838548
GO:0006874	cellular calcium ion homeostasis	357	0.265563	1.23232	0.0539852	0.846028	0.838548
GO:0032459	regulation of protein oligomerization	37	0.41606	1.42521	0.0541248	0.846028	0.838548
GO:0060992	response to fungicide	11	-0.541907	-1.53145	0.0541572	0.846028	0.838548
GO:1905809	negative regulation of synapse organization	17	0.516573	1.47401	0.0542295	0.846028	0.838548
GO:1903671	negative regulation of sprouting angiogenesis	27	-0.388341	-1.43663	0.054305	0.846028	0.838548
GO:0019935	cyclic-nucleotide-mediated signaling	134	0.309873	1.31453	0.0543392	0.846028	0.838548
GO:0072425	signal transduction involved in G2 DNA damage checkpoint	11	0.585697	1.48392	0.0543579	0.846028	0.838548
GO:1900006	positive regulation of dendrite development	58	0.371246	1.38802	0.0544959	0.846028	0.838548
GO:0090049	regulation of cell migration involved in sprouting angiogenesis	39	-0.342664	-1.39218	0.0546387	0.846028	0.838548
GO:0099003	vesicle-mediated transport in synapse	125	0.313774	1.31966	0.0549921	0.849242	0.841734
GO:0018212	peptidyl-tyrosine modification	326	0.268318	1.23781	0.0552123	0.850386	0.842868
GO:0051186	cofactor metabolic process	489	0.255133	1.20418	0.055909	0.850781	0.843259
GO:0072384	organelle transport along microtubule	69	0.355467	1.36945	0.0559755	0.850781	0.843259
GO:0001911	negative regulation of leukocyte mediated cytotoxicity	14	0.544781	1.47653	0.0561038	0.850781	0.843259
GO:0009206	purine ribonucleoside triphosphate biosynthetic process	130	0.310883	1.31391	0.0561508	0.850781	0.843259
GO:0043011	myeloid dendritic cell differentiation	16	0.523539	1.47016	0.0563828	0.850781	0.843259
GO:0010039	response to iron ion	29	0.442441	1.437	0.0564212	0.850781	0.843259
GO:0034405	response to fluid shear stress	32	0.430309	1.42893	0.0565553	0.850781	0.843259
GO:0030949	positive regulation of vascular endothelial growth factor receptor signaling pathway	15	0.533199	1.47191	0.0567457	0.850781	0.843259
GO:0008585	female gonad development	83	0.340385	1.35112	0.0568802	0.850781	0.843259
GO:0043550	regulation of lipid kinase activity	45	0.393396	1.40204	0.0570093	0.850781	0.843259
GO:0050856	regulation of T cell receptor signaling pathway	31	0.433707	1.4301	0.0572294	0.850781	0.843259
GO:1903322	positive regulation of protein modification by small protein conjugation or removal	101	0.32625	1.33332	0.0574738	0.850781	0.843259
GO:0051588	regulation of neurotransmitter transport	81	0.342113	1.35293	0.0574818	0.850781	0.843259
GO:0045815	positive regulation of gene expression, epigenetic	65	0.35954	1.37115	0.0578156	0.850781	0.843259
GO:0072593	reactive oxygen species metabolic process	212	0.284909	1.26988	0.0580597	0.850781	0.843259
GO:0019827	stem cell population maintenance	142	0.304978	1.30295	0.0581478	0.850781	0.843259
GO:0006352	DNA-templated transcription, initiation	218	-0.214643	-1.19147	0.0581884	0.850781	0.843259
GO:0045980	negative regulation of nucleotide metabolic process	46	0.390372	1.39716	0.0583657	0.850781	0.843259
GO:1904030	negative regulation of cyclin-dependent protein kinase activity	29	0.440886	1.43195	0.0583855	0.850781	0.843259
GO:0006699	bile acid biosynthetic process	26	-0.389909	-1.42816	0.058456	0.850781	0.843259
GO:0015872	dopamine transport	34	0.422063	1.42006	0.0585414	0.850781	0.843259
GO:0051047	positive regulation of secretion	339	0.26601	1.23034	0.0585929	0.850781	0.843259
GO:0046717	acid secretion	102	0.325003	1.33013	0.0587435	0.850781	0.843259
GO:0051302	regulation of cell division	129	0.310181	1.30979	0.0589874	0.850781	0.843259
GO:0060291	long-term synaptic potentiation	68	0.355132	1.36487	0.0590407	0.850781	0.843259
GO:0099175	regulation of postsynapse organization	53	0.376425	1.38425	0.0593324	0.850781	0.843259
GO:0010907	positive regulation of glucose metabolic process	30	0.435846	1.42666	0.0595844	0.850781	0.843259
GO:2000300	regulation of synaptic vesicle exocytosis	25	0.457958	1.43775	0.0598426	0.850781	0.843259
GO:0006090	pyruvate metabolic process	117	0.315636	1.31617	0.0599572	0.850781	0.843259
GO:0032438	melanosome organization	23	-0.406326	-1.43871	0.060196	0.850781	0.843259
GO:0006367	transcription initiation from RNA polymerase II promoter	168	-0.226324	-1.21358	0.0602477	0.850781	0.843259
GO:0010649	regulation of cell communication by electrical coupling	11	-0.534481	-1.51046	0.0603107	0.850781	0.843259
GO:0016042	lipid catabolic process	259	0.275519	1.24969	0.0604184	0.850781	0.843259
GO:0021513	spinal cord dorsal/ventral patterning	22	-0.412339	-1.44197	0.0605027	0.850781	0.843259
GO:0007320	insemination	10	0.595725	1.46851	0.0605493	0.850781	0.843259
GO:0002029	desensitization of G-protein coupled receptor protein signaling pathway	15	-0.474836	-1.48204	0.0606448	0.850781	0.843259
GO:0022401	negative adaptation of signaling pathway	15	-0.474836	-1.48204	0.0606448	0.850781	0.843259
GO:0090394	negative regulation of excitatory postsynaptic potential	10	0.595395	1.4677	0.0608789	0.850914	0.843391
GO:0042116	macrophage activation	54	0.373727	1.37913	0.0610886	0.850914	0.843391
GO:0001773	myeloid dendritic cell activation	25	0.456883	1.43438	0.0612255	0.850914	0.843391
GO:0002709	regulation of T cell mediated immunity	45	0.390728	1.39253	0.0612389	0.850914	0.843391
GO:0030815	negative regulation of cAMP metabolic process	24	0.46182	1.43602	0.0616289	0.853678	0.84613
GO:0048536	spleen development	32	-0.360984	-1.39536	0.0617313	0.853678	0.84613
GO:0030516	regulation of axon extension	81	0.339799	1.34377	0.06198	0.853678	0.84613
GO:0048593	camera-type eye morphogenesis	99	0.32538	1.32615	0.06217	0.853678	0.84613
GO:2000831	regulation of steroid hormone secretion	16	0.518127	1.45497	0.0624188	0.853678	0.84613
GO:0043651	linoleic acid metabolic process	16	0.517988	1.45457	0.0625873	0.853678	0.84613
GO:0022410	circadian sleep/wake cycle process	23	0.466639	1.43651	0.0628113	0.853678	0.84613
GO:0043903	regulation of symbiosis, encompassing mutualism through parasitism	203	-0.216567	-1.1913	0.0628212	0.853678	0.84613
GO:0007188	adenylate cyclase-modulating G-protein coupled receptor signaling pathway	160	0.296712	1.28519	0.062909	0.853678	0.84613
GO:0010288	response to lead ion	18	0.499739	1.44735	0.0631866	0.853678	0.84613
GO:0048854	brain morphogenesis	33	-0.356234	-1.38783	0.063245	0.853678	0.84613
GO:0071294	cellular response to zinc ion	16	-0.460505	-1.46617	0.063448	0.853678	0.84613
GO:0009145	purine nucleoside triphosphate biosynthetic process	131	0.307391	1.30039	0.063665	0.853678	0.84613
GO:0060487	lung epithelial cell differentiation	19	-0.432125	-1.44844	0.0638257	0.853678	0.84613
GO:0022406	membrane docking	159	0.29634	1.28262	0.0648321	0.853678	0.84613
GO:0018196	peptidyl-asparagine modification	37	0.408474	1.39922	0.0648924	0.853678	0.84613
GO:0042095	interferon-gamma biosynthetic process	16	0.516006	1.44901	0.0649026	0.853678	0.84613
GO:0046688	response to copper ion	29	0.436072	1.41632	0.0649755	0.853678	0.84613
GO:0018209	peptidyl-serine modification	277	0.271468	1.23783	0.065457	0.853678	0.84613
GO:1904321	response to forskolin	10	0.590911	1.45664	0.0655632	0.853678	0.84613
GO:1904322	cellular response to forskolin	10	0.590911	1.45664	0.0655632	0.853678	0.84613
GO:0032366	intracellular sterol transport	17	0.50646	1.44515	0.0655733	0.853678	0.84613
GO:0032367	intracellular cholesterol transport	17	0.50646	1.44515	0.0655733	0.853678	0.84613
GO:0035196	production of miRNAs involved in gene silencing by miRNA	40	0.399754	1.39146	0.0657587	0.853678	0.84613
GO:0071417	cellular response to organonitrogen compound	479	0.253439	1.19504	0.0659256	0.853678	0.84613
GO:0045616	regulation of keratinocyte differentiation	33	0.420235	1.40485	0.0659596	0.853678	0.84613
GO:0034397	telomere localization	12	-0.510994	-1.48625	0.0660733	0.853678	0.84613
GO:0018279	protein N-linked glycosylation via asparagine	36	0.410558	1.39817	0.066147	0.853678	0.84613
GO:0002063	chondrocyte development	21	-0.414242	-1.42955	0.0664015	0.853678	0.84613
GO:0071218	cellular response to misfolded protein	19	0.48952	1.43784	0.0664453	0.853678	0.84613
GO:0048705	skeletal system morphogenesis	179	0.28994	1.27103	0.0665196	0.853678	0.84613
GO:0098727	maintenance of cell number	144	0.300932	1.28775	0.0666076	0.853678	0.84613
GO:0140056	organelle localization by membrane tethering	151	0.298343	1.28377	0.0666097	0.853678	0.84613
GO:0060306	regulation of membrane repolarization	32	0.42323	1.40542	0.0666117	0.853678	0.84613
GO:0009108	coenzyme biosynthetic process	209	0.282706	1.25852	0.066743	0.853678	0.84613
GO:0009147	pyrimidine nucleoside triphosphate metabolic process	20	0.481761	1.43326	0.0673625	0.853678	0.84613
GO:0050774	negative regulation of dendrite morphogenesis	14	0.533943	1.44716	0.0678046	0.853678	0.84613
GO:0007212	dopamine receptor signaling pathway	42	0.39346	1.38315	0.0678343	0.853678	0.84613
GO:2000463	positive regulation of excitatory postsynaptic potential	25	0.451815	1.41847	0.0681128	0.853678	0.84613
GO:1902803	regulation of synaptic vesicle transport	27	0.442428	1.41374	0.0682576	0.853678	0.84613
GO:0042110	T cell activation	377	0.260036	1.21068	0.0683141	0.853678	0.84613
GO:0042168	heme metabolic process	23	0.462198	1.42284	0.0684315	0.853678	0.84613
GO:0018105	peptidyl-serine phosphorylation	252	0.274235	1.24114	0.0684663	0.853678	0.84613
GO:0043620	regulation of DNA-templated transcription in response to stress	110	-0.247432	-1.24396	0.0684873	0.853678	0.84613
GO:0044458	motile cilium assembly	18	0.495373	1.43471	0.0685756	0.853678	0.84613
GO:0036158	outer dynein arm assembly	17	0.503978	1.43807	0.0685916	0.853678	0.84613
GO:0062014	negative regulation of small molecule metabolic process	101	0.321208	1.31271	0.0686737	0.853678	0.84613
GO:0060080	inhibitory postsynaptic potential	14	0.532824	1.44413	0.0690878	0.853678	0.84613
GO:0030213	hyaluronan biosynthetic process	12	0.557315	1.44722	0.0691019	0.853678	0.84613
GO:0046641	positive regulation of alpha-beta T cell proliferation	15	0.522157	1.44143	0.0691078	0.853678	0.84613
GO:0006105	succinate metabolic process	12	0.556808	1.44591	0.0696932	0.853678	0.84613
GO:0007589	body fluid secretion	80	0.337014	1.33011	0.0698196	0.853678	0.84613
GO:0006633	fatty acid biosynthetic process	110	0.315303	1.30409	0.0700456	0.853678	0.84613
GO:0044242	cellular lipid catabolic process	173	0.290284	1.26804	0.0704411	0.853678	0.84613
GO:0006638	neutral lipid metabolic process	96	0.323781	1.31369	0.0704635	0.853678	0.84613
GO:0051783	regulation of nuclear division	154	0.295914	1.27627	0.0706321	0.853678	0.84613
GO:0097484	dendrite extension	29	0.432025	1.40317	0.0708655	0.853678	0.84613
GO:0006140	regulation of nucleotide metabolic process	172	0.290334	1.26751	0.070956	0.853678	0.84613
GO:0035929	steroid hormone secretion	18	0.493309	1.42873	0.0712218	0.853678	0.84613
GO:0042269	regulation of natural killer cell mediated cytotoxicity	33	0.416773	1.39328	0.0712821	0.853678	0.84613
GO:0043555	regulation of translation in response to stress	18	-0.433773	-1.43116	0.0719249	0.853678	0.84613
GO:0036296	response to increased oxygen levels	26	0.444235	1.40744	0.0720462	0.853678	0.84613
GO:0001774	microglial cell activation	21	0.471176	1.41887	0.0726804	0.853678	0.84613
GO:0006241	CTP biosynthetic process	12	0.554127	1.43894	0.0728481	0.853678	0.84613
GO:0046036	CTP metabolic process	12	0.554127	1.43894	0.0728481	0.853678	0.84613
GO:0050810	regulation of steroid biosynthetic process	70	-0.277461	-1.28342	0.072902	0.853678	0.84613
GO:0060444	branching involved in mammary gland duct morphogenesis	21	0.471002	1.41834	0.0729348	0.853678	0.84613
GO:0034505	tooth mineralization	16	0.509366	1.43036	0.0729455	0.853678	0.84613
GO:0006929	substrate-dependent cell migration	26	-0.379239	-1.38908	0.073045	0.853678	0.84613
GO:2000171	negative regulation of dendrite development	24	0.453301	1.40953	0.0731262	0.853678	0.84613
GO:0030307	positive regulation of cell growth	139	0.300514	1.28053	0.0732012	0.853678	0.84613
GO:0045141	meiotic telomere clustering	10	-0.540136	-1.47973	0.0733129	0.853678	0.84613
GO:0005513	detection of calcium ion	12	0.553568	1.43749	0.0735045	0.853678	0.84613
GO:0007194	negative regulation of adenylate cyclase activity	21	0.47047	1.41674	0.0736439	0.853678	0.84613
GO:0007431	salivary gland development	34	-0.346273	-1.35933	0.0736789	0.853678	0.84613
GO:0045103	intermediate filament-based process	37	0.402826	1.37988	0.0737872	0.853678	0.84613
GO:0045104	intermediate filament cytoskeleton organization	37	0.402826	1.37988	0.0737872	0.853678	0.84613
GO:0051055	negative regulation of lipid biosynthetic process	43	-0.32074	-1.33378	0.0738365	0.853678	0.84613
GO:0036303	lymph vessel morphogenesis	17	0.49964	1.42569	0.0739928	0.853678	0.84613
GO:0051560	mitochondrial calcium ion homeostasis	22	0.463995	1.41314	0.0740332	0.853678	0.84613
GO:0045807	positive regulation of endocytosis	116	0.310491	1.29333	0.0741895	0.853678	0.84613
GO:0097479	synaptic vesicle localization	114	0.311574	1.29494	0.0741911	0.853678	0.84613
GO:1901407	regulation of phosphorylation of RNA polymerase II C-terminal domain	11	-0.519542	-1.46825	0.0742979	0.853678	0.84613
GO:0008593	regulation of Notch signaling pathway	79	-0.267744	-1.26786	0.0743819	0.853678	0.84613
GO:0045072	regulation of interferon-gamma biosynthetic process	15	0.517924	1.42974	0.0744495	0.853678	0.84613
GO:0043266	regulation of potassium ion transport	81	0.333979	1.32076	0.0745366	0.853678	0.84613
GO:0030207	chondroitin sulfate catabolic process	13	0.539839	1.43354	0.0745395	0.853678	0.84613
GO:0098869	cellular oxidant detoxification	84	0.331166	1.31708	0.0747457	0.853678	0.84613
GO:0097104	postsynaptic membrane assembly	11	0.566482	1.43523	0.0748049	0.853678	0.84613
GO:0036445	neuronal stem cell division	13	-0.486889	-1.45283	0.0748902	0.853678	0.84613
GO:0055057	neuroblast division	13	-0.486889	-1.45283	0.0748902	0.853678	0.84613
GO:0051782	negative regulation of cell division	13	0.539455	1.43252	0.0750001	0.853678	0.84613
GO:0007157	heterophilic cell-cell adhesion via plasma membrane cell adhesion molecules	45	0.382632	1.36368	0.0750744	0.853678	0.84613
GO:0009201	ribonucleoside triphosphate biosynthetic process	136	0.300973	1.27908	0.0752769	0.854312	0.846759
GO:0055074	calcium ion homeostasis	367	0.259258	1.20506	0.075441	0.854509	0.846954
GO:0035810	positive regulation of urine volume	12	0.55174	1.43275	0.0757336	0.855622	0.848057
GO:0046364	monosaccharide biosynthetic process	80	0.334348	1.31959	0.0758332	0.855622	0.848057
GO:0002711	positive regulation of T cell mediated immunity	26	0.441537	1.39889	0.0760373	0.856265	0.848695
GO:0048148	behavioral response to cocaine	17	0.497874	1.42065	0.0764027	0.858254	0.850666
GO:0071696	ectodermal placode development	15	0.516223	1.42505	0.0765974	0.858254	0.850666
GO:0050688	regulation of defense response to virus	60	0.356172	1.33975	0.0766562	0.858254	0.850666
GO:0002715	regulation of natural killer cell mediated immunity	34	0.409897	1.37913	0.0773524	0.863692	0.856056
GO:0010988	regulation of low-density lipoprotein particle clearance	11	-0.516432	-1.45946	0.0774386	0.863692	0.856056
GO:0010248	establishment or maintenance of transmembrane electrochemical gradient	11	0.563839	1.42853	0.077907	0.864972	0.857324
GO:0045821	positive regulation of glycolytic process	16	0.505577	1.41972	0.077999	0.864972	0.857324
GO:0051197	positive regulation of coenzyme metabolic process	16	0.505577	1.41972	0.077999	0.864972	0.857324
GO:0021511	spinal cord patterning	24	-0.386408	-1.38496	0.0786837	0.866723	0.85906
GO:0019682	glyceraldehyde-3-phosphate metabolic process	24	0.449571	1.39793	0.0787805	0.866723	0.85906
GO:0097530	granulocyte migration	86	0.32792	1.30884	0.0788559	0.866723	0.85906
GO:0071377	cellular response to glucagon stimulus	33	0.412132	1.37777	0.0789928	0.866723	0.85906
GO:0051988	regulation of attachment of spindle microtubules to kinetochore	11	0.562914	1.42619	0.0789998	0.866723	0.85906
GO:1902894	negative regulation of pri-miRNA transcription by RNA polymerase II	10	0.579019	1.42733	0.0790501	0.866723	0.85906
GO:0071384	cellular response to corticosteroid stimulus	61	0.353616	1.33393	0.0793554	0.868435	0.860757
GO:0098868	bone growth	21	-0.404203	-1.39491	0.0797597	0.868511	0.860832
GO:0007603	phototransduction, visible light	25	0.443674	1.39291	0.0800038	0.868511	0.860832
GO:0051260	protein homooligomerization	285	0.266673	1.21866	0.0800201	0.868511	0.860832
GO:0031342	negative regulation of cell killing	16	0.503956	1.41517	0.0801399	0.868511	0.860832
GO:0097711	ciliary basal body-plasma membrane docking	83	0.329736	1.30885	0.0802675	0.868511	0.860832
GO:0006783	heme biosynthetic process	17	0.494886	1.41213	0.0804212	0.868511	0.860832
GO:1901077	regulation of relaxation of muscle	10	-0.532989	-1.46015	0.080621	0.868511	0.860832
GO:0015696	ammonium transport	84	0.328739	1.30743	0.0806459	0.868511	0.860832
GO:2000106	regulation of leukocyte apoptotic process	75	0.33711	1.31653	0.0807369	0.868511	0.860832
GO:0035872	nucleotide-binding domain, leucine rich repeat containing receptor signaling pathway	34	0.407824	1.37215	0.0808542	0.868511	0.860832
GO:0097201	negative regulation of transcription from RNA polymerase II promoter in response to stress	12	-0.49604	-1.44276	0.0816234	0.870401	0.862705
GO:0043280	positive regulation of cysteine-type endopeptidase activity involved in apoptotic process	112	0.3099	1.28495	0.0816592	0.870401	0.862705
GO:0070423	nucleotide-binding oligomerization domain containing signaling pathway	33	0.410556	1.3725	0.0817604	0.870401	0.862705
GO:0097366	response to bronchodilator	41	0.387807	1.35666	0.0822337	0.870401	0.862705
GO:0043407	negative regulation of MAP kinase activity	67	0.3449	1.32223	0.0823814	0.870401	0.862705
GO:0097696	STAT cascade	140	0.297036	1.26688	0.0826812	0.870401	0.862705
GO:0050686	negative regulation of mRNA processing	27	-0.368268	-1.36238	0.0830738	0.870401	0.862705
GO:0046605	regulation of centrosome cycle	47	0.37435	1.34555	0.0831641	0.870401	0.862705
GO:0033500	carbohydrate homeostasis	193	0.281318	1.24263	0.083217	0.870401	0.862705
GO:0042593	glucose homeostasis	193	0.281318	1.24263	0.083217	0.870401	0.862705
GO:0002673	regulation of acute inflammatory response	66	0.345673	1.32161	0.0834791	0.870401	0.862705
GO:0035307	positive regulation of protein dephosphorylation	34	0.406297	1.36702	0.0835775	0.870401	0.862705
GO:0035767	endothelial cell chemotaxis	25	0.441454	1.38594	0.0835831	0.870401	0.862705
GO:0045862	positive regulation of proteolysis	313	0.262533	1.2078	0.0836823	0.870401	0.862705
GO:0042832	defense response to protozoan	15	0.510753	1.40995	0.0839129	0.870401	0.862705
GO:0061178	regulation of insulin secretion involved in cellular response to glucose stimulus	46	0.376048	1.34589	0.0840469	0.870401	0.862705
GO:0045661	regulation of myoblast differentiation	43	0.382162	1.34987	0.0842137	0.870401	0.862705
GO:0045662	negative regulation of myoblast differentiation	21	0.463365	1.39535	0.0842252	0.870401	0.862705
GO:0048333	mesodermal cell differentiation	30	-0.354588	-1.3482	0.0843946	0.870401	0.862705
GO:0046883	regulation of hormone secretion	234	0.27286	1.22722	0.0847029	0.870401	0.862705
GO:1900120	regulation of receptor binding	22	0.456776	1.39116	0.0847079	0.870401	0.862705
GO:0006949	syncytium formation	45	0.377526	1.34548	0.0849226	0.870401	0.862705
GO:0043090	amino acid import	21	-0.400591	-1.38245	0.0850941	0.870401	0.862705
GO:1901987	regulation of cell cycle phase transition	380	0.256153	1.19315	0.0851903	0.870401	0.862705
GO:0051482	positive regulation of cytosolic calcium ion concentration involved in phospholipase C-activating G-protein coupled signaling pathway	25	0.440316	1.38236	0.0854437	0.870401	0.862705
GO:0045943	positive regulation of transcription by RNA polymerase I	19	0.475508	1.39669	0.0854503	0.870401	0.862705
GO:0003416	endochondral bone growth	19	-0.41514	-1.39151	0.0857209	0.870401	0.862705
GO:0007156	homophilic cell adhesion via plasma membrane adhesion molecules	132	-0.232241	-1.20215	0.0857834	0.870401	0.862705
GO:0019068	virion assembly	33	0.408169	1.36452	0.0858346	0.870401	0.862705
GO:0000086	G2/M transition of mitotic cell cycle	215	0.276021	1.23192	0.0861065	0.870401	0.862705
GO:0072576	liver morphogenesis	16	0.499562	1.40283	0.0861953	0.870401	0.862705
GO:0099173	postsynapse organization	94	0.319075	1.29074	0.0863807	0.870401	0.862705
GO:0030800	negative regulation of cyclic nucleotide metabolic process	26	0.43494	1.37799	0.086638	0.870401	0.862705
GO:0097106	postsynaptic density organization	14	0.518897	1.40638	0.0867685	0.870401	0.862705
GO:0099084	postsynaptic specialization organization	14	0.518897	1.40638	0.0867685	0.870401	0.862705
GO:0036498	IRE1-mediated unfolded protein response	65	0.345446	1.3174	0.0868953	0.870401	0.862705
GO:0046545	development of primary female sexual characteristics	88	0.323172	1.29457	0.0869252	0.870401	0.862705
GO:0010458	exit from mitosis	26	0.434725	1.37731	0.0869865	0.870401	0.862705
GO:0030851	granulocyte differentiation	28	0.426074	1.37295	0.0871007	0.870401	0.862705
GO:0060998	regulation of dendritic spine development	62	0.348914	1.31997	0.0871143	0.870401	0.862705
GO:0070286	axonemal dynein complex assembly	32	0.410818	1.3642	0.0871932	0.870401	0.862705
GO:0048524	positive regulation of viral process	97	-0.249873	-1.2288	0.0873092	0.870401	0.862705
GO:0043558	regulation of translational initiation in response to stress	14	-0.463195	-1.41462	0.0876652	0.872294	0.864582
GO:0006732	coenzyme metabolic process	330	0.25995	1.20015	0.0877988	0.872294	0.864582
GO:0010758	regulation of macrophage chemotaxis	16	0.498188	1.39897	0.0881195	0.87399	0.866263
GO:0048545	response to steroid hormone	346	0.258353	1.1965	0.088525	0.874924	0.867189
GO:1902475	L-alpha-amino acid transmembrane transport	38	-0.32639	-1.31761	0.0886734	0.874924	0.867189
GO:0010669	epithelial structure maintenance	20	-0.405062	-1.37852	0.089008	0.874924	0.867189
GO:0009209	pyrimidine ribonucleoside triphosphate biosynthetic process	13	0.528627	1.40377	0.0891216	0.874924	0.867189
GO:0097529	myeloid leukocyte migration	128	0.299787	1.26452	0.0891407	0.874924	0.867189
GO:0043030	regulation of macrophage activation	33	0.406371	1.35851	0.0891874	0.874924	0.867189
GO:0046456	icosanoid biosynthetic process	38	0.391546	1.34852	0.0895314	0.874924	0.867189
GO:0033238	regulation of cellular amine metabolic process	65	-0.27721	-1.26294	0.0895469	0.874924	0.867189
GO:1990748	cellular detoxification	88	0.322085	1.29022	0.0898519	0.874924	0.867189
GO:0043588	skin development	292	0.263555	1.20654	0.089928	0.874924	0.867189
GO:0051650	establishment of vesicle localization	227	0.27282	1.22368	0.0899432	0.874924	0.867189
GO:0048753	pigment granule organization	24	-0.3792	-1.35912	0.0900623	0.874924	0.867189
GO:0045599	negative regulation of fat cell differentiation	38	0.391227	1.34743	0.0901674	0.874924	0.867189
GO:0006639	acylglycerol metabolic process	95	0.316827	1.28362	0.0904452	0.875252	0.867514
GO:0031649	heat generation	16	0.496469	1.39415	0.0906335	0.875252	0.867514
GO:1900407	regulation of cellular response to oxidative stress	66	0.342562	1.30972	0.0908037	0.875252	0.867514
GO:1904262	negative regulation of TORC1 signaling	11	0.553914	1.40339	0.0909149	0.875252	0.867514
GO:0071800	podosome assembly	18	0.479	1.38729	0.0914971	0.875252	0.867514
GO:0051955	regulation of amino acid transport	29	0.419356	1.36202	0.0916458	0.875252	0.867514
GO:0009208	pyrimidine ribonucleoside triphosphate metabolic process	14	0.515394	1.39689	0.0917762	0.875252	0.867514
GO:0002360	T cell lineage commitment	23	0.446794	1.37542	0.0918041	0.875252	0.867514
GO:1904886	beta-catenin destruction complex disassembly	20	0.464678	1.38244	0.0918459	0.875252	0.867514
GO:0051222	positive regulation of protein transport	374	0.255324	1.18817	0.0918526	0.875252	0.867514
GO:0070070	proton-transporting V-type ATPase complex assembly	10	-0.522407	-1.43116	0.0921804	0.875252	0.867514
GO:0070072	vacuolar proton-transporting V-type ATPase complex assembly	10	-0.522407	-1.43116	0.0921804	0.875252	0.867514
GO:0042976	activation of Janus kinase activity	12	0.538784	1.3991	0.0922184	0.875252	0.867514
GO:0009141	nucleoside triphosphate metabolic process	279	0.264679	1.20759	0.0924309	0.875252	0.867514
GO:0007187	G-protein coupled receptor signaling pathway, coupled to cyclic nucleotide second messenger	189	0.279871	1.2337	0.0924562	0.875252	0.867514
GO:0002688	regulation of leukocyte chemotaxis	84	0.324165	1.28924	0.0926302	0.875476	0.867736
GO:0071498	cellular response to fluid shear stress	18	0.478149	1.38482	0.0929264	0.876852	0.869099
GO:0046039	GTP metabolic process	29	0.418549	1.3594	0.0930936	0.877008	0.869255
GO:0016180	snRNA processing	23	-0.382938	-1.3559	0.0938348	0.877378	0.86962
GO:0009142	nucleoside triphosphate biosynthetic process	147	0.291202	1.2492	0.0938545	0.877378	0.86962
GO:0038094	Fc-gamma receptor signaling pathway	75	0.331859	1.29602	0.0939429	0.877378	0.86962
GO:0060563	neuroepithelial cell differentiation	51	-0.295712	-1.2792	0.0941721	0.877378	0.86962
GO:1900542	regulation of purine nucleotide metabolic process	166	0.285187	1.24027	0.0943137	0.877378	0.86962
GO:1990138	neuron projection extension	144	0.292067	1.24981	0.0944003	0.877378	0.86962
GO:0010952	positive regulation of peptidase activity	162	0.286191	1.24137	0.0948474	0.877378	0.86962
GO:0035815	positive regulation of renal sodium excretion	12	0.536681	1.39364	0.0951411	0.877378	0.86962
GO:0032352	positive regulation of hormone metabolic process	10	0.566395	1.39621	0.0953688	0.877378	0.86962
GO:0050891	multicellular organismal water homeostasis	52	0.359921	1.31877	0.0954393	0.877378	0.86962
GO:2000142	regulation of DNA-templated transcription, initiation	36	-0.329068	-1.31096	0.0954656	0.877378	0.86962
GO:0009264	deoxyribonucleotide catabolic process	17	0.484392	1.38218	0.0958087	0.877378	0.86962
GO:0046683	response to organophosphorus	115	0.303688	1.26358	0.0958767	0.877378	0.86962
GO:0006692	prostanoid metabolic process	32	0.406176	1.34879	0.0959226	0.877378	0.86962
GO:0006693	prostaglandin metabolic process	32	0.406176	1.34879	0.0959226	0.877378	0.86962
GO:0032612	interleukin-1 production	72	0.334009	1.29581	0.0960426	0.877378	0.86962
GO:0044804	autophagy of nucleus	17	0.484233	1.38173	0.0960479	0.877378	0.86962
GO:0051932	synaptic transmission, GABAergic	42	0.378679	1.33119	0.0960503	0.877378	0.86962
GO:0048532	anatomical structure arrangement	14	-0.456631	-1.39457	0.0963416	0.877378	0.86962
GO:0043331	response to dsRNA	81	0.325364	1.28669	0.0963651	0.877378	0.86962
GO:0099623	regulation of cardiac muscle cell membrane repolarization	25	0.433866	1.36212	0.0964094	0.877378	0.86962
GO:0002093	auditory receptor cell morphogenesis	15	-0.444939	-1.38873	0.0964482	0.877378	0.86962
GO:0071385	cellular response to glucocorticoid stimulus	57	0.351747	1.31099	0.0966942	0.878243	0.870478
GO:0009954	proximal/distal pattern formation	28	0.420501	1.35499	0.0970127	0.879763	0.871985
GO:1901990	regulation of mitotic cell cycle phase transition	355	0.25584	1.18682	0.0973779	0.88164	0.873845
GO:1903532	positive regulation of secretion by cell	314	0.259531	1.19423	0.0977963	0.88164	0.873845
GO:0032611	interleukin-1 beta production	59	0.348313	1.30625	0.0979172	0.88164	0.873845
GO:0000070	mitotic sister chromatid segregation	139	0.292776	1.24756	0.0982917	0.88164	0.873845
GO:0035773	insulin secretion involved in cellular response to glucose stimulus	53	0.357039	1.31296	0.0983218	0.88164	0.873845
GO:0043537	negative regulation of blood vessel endothelial cell migration	33	-0.336918	-1.31258	0.0983938	0.88164	0.873845
GO:0060261	positive regulation of transcription initiation from RNA polymerase II promoter	21	-0.392328	-1.35393	0.0986136	0.88164	0.873845
GO:0001508	action potential	122	0.299459	1.25559	0.0990168	0.88164	0.873845
GO:0048368	lateral mesoderm development	15	-0.442923	-1.38243	0.0993037	0.88164	0.873845
GO:0021871	forebrain regionalization	20	-0.398617	-1.35659	0.0993671	0.88164	0.873845
GO:0051788	response to misfolded protein	21	0.45387	1.36675	0.0995555	0.88164	0.873845
GO:0019233	sensory perception of pain	79	0.32602	1.28414	0.0996309	0.88164	0.873845
GO:0000022	mitotic spindle elongation	10	0.563152	1.38821	0.0998292	0.88164	0.873845
GO:0006111	regulation of gluconeogenesis	30	0.411181	1.34592	0.0998957	0.88164	0.873845
GO:0071229	cellular response to acid chemical	173	0.281707	1.23057	0.100581	0.88164	0.873845
GO:0086001	cardiac muscle cell action potential	62	0.343425	1.2992	0.100714	0.88164	0.873845
GO:0007159	leukocyte cell-cell adhesion	267	0.264422	1.20232	0.100742	0.88164	0.873845
GO:0060999	positive regulation of dendritic spine development	37	0.388709	1.33152	0.10075	0.88164	0.873845
GO:0009144	purine nucleoside triphosphate metabolic process	261	0.265144	1.20336	0.100901	0.88164	0.873845
GO:0006691	leukotriene metabolic process	20	0.459087	1.3658	0.101211	0.88164	0.873845
GO:0031280	negative regulation of cyclase activity	23	0.441248	1.35834	0.101319	0.88164	0.873845
GO:0019433	triglyceride catabolic process	25	0.431189	1.35371	0.10138	0.88164	0.873845
GO:0016236	macroautophagy	258	0.265446	1.20362	0.101537	0.88164	0.873845
GO:0032780	negative regulation of ATPase activity	13	-0.465204	-1.38812	0.101558	0.88164	0.873845
GO:0042730	fibrinolysis	18	0.472778	1.36927	0.10171	0.88164	0.873845
GO:1900121	negative regulation of receptor binding	13	0.519938	1.38069	0.101734	0.88164	0.873845
GO:0009048	dosage compensation by inactivation of X chromosome	11	0.545949	1.38321	0.10207	0.88164	0.873845
GO:0072498	embryonic skeletal joint development	14	0.508316	1.3777	0.10207	0.88164	0.873845
GO:0007205	protein kinase C-activating G-protein coupled receptor signaling pathway	25	0.430787	1.35245	0.102116	0.88164	0.873845
GO:0007259	JAK-STAT cascade	139	0.291721	1.24306	0.102118	0.88164	0.873845
GO:0003014	renal system process	100	0.309847	1.26457	0.102359	0.88164	0.873845
GO:0048569	post-embryonic animal organ development	15	0.498001	1.37475	0.102487	0.88164	0.873845
GO:0031468	nuclear envelope reassembly	18	0.472265	1.36778	0.102565	0.88164	0.873845
GO:1904666	regulation of ubiquitin protein ligase activity	16	0.48868	1.37227	0.102571	0.88164	0.873845
GO:0003197	endocardial cushion development	35	-0.328553	-1.29959	0.102737	0.88164	0.873845
GO:0051350	negative regulation of lyase activity	25	0.430459	1.35142	0.102753	0.88164	0.873845
GO:0050860	negative regulation of T cell receptor signaling pathway	16	0.488512	1.3718	0.102823	0.88164	0.873845
GO:0010390	histone monoubiquitination	25	0.430252	1.35077	0.103119	0.882524	0.874722
GO:0002028	regulation of sodium ion transport	78	0.325713	1.28015	0.103229	0.882524	0.874722
GO:0051054	positive regulation of DNA metabolic process	196	0.275384	1.21834	0.104191	0.886115	0.878281
GO:0050805	negative regulation of synaptic transmission	65	0.338463	1.29077	0.104234	0.886115	0.878281
GO:0006898	receptor-mediated endocytosis	240	0.267448	1.20556	0.104364	0.886115	0.878281
GO:0021545	cranial nerve development	42	-0.309547	-1.28008	0.10454	0.886115	0.878281
GO:0010975	regulation of neuron projection development	408	0.250609	1.172	0.104628	0.886115	0.878281
GO:0051480	regulation of cytosolic calcium ion concentration	272	0.262965	1.19741	0.104637	0.886115	0.878281
GO:0046473	phosphatidic acid metabolic process	33	0.398554	1.33238	0.104714	0.886115	0.878281
GO:0038128	ERBB2 signaling pathway	31	0.405066	1.33565	0.105038	0.887562	0.879715
GO:0032103	positive regulation of response to external stimulus	223	0.270016	1.20911	0.105273	0.888258	0.880405
GO:0010954	positive regulation of protein processing	22	0.444214	1.3529	0.106002	0.892937	0.885043
GO:0006590	thyroid hormone generation	13	0.517058	1.37304	0.106134	0.892937	0.885043
GO:0006359	regulation of transcription by RNA polymerase III	23	-0.375795	-1.3306	0.106775	0.895923	0.888002
GO:0007221	positive regulation of transcription of Notch receptor target	17	-0.418165	-1.35645	0.106797	0.895923	0.888002
GO:0045927	positive regulation of growth	223	0.269588	1.20719	0.107295	0.896756	0.888828
GO:0030903	notochord development	14	0.504819	1.36822	0.107433	0.896756	0.888828
GO:0006568	tryptophan metabolic process	10	0.557863	1.37517	0.107637	0.896756	0.888828
GO:0051194	positive regulation of cofactor metabolic process	19	0.461866	1.35662	0.107704	0.896756	0.888828
GO:0030104	water homeostasis	55	0.350217	1.29672	0.107816	0.896756	0.888828
GO:0090169	regulation of spindle assembly	23	0.437189	1.34585	0.108753	0.896756	0.888828
GO:0099054	presynapse assembly	17	0.476321	1.35915	0.108891	0.896756	0.888828
GO:0009914	hormone transport	284	0.260617	1.19065	0.109247	0.896756	0.888828
GO:1903708	positive regulation of hemopoiesis	145	0.287796	1.23257	0.109339	0.896756	0.888828
GO:0043968	histone H2A acetylation	13	0.514784	1.36701	0.109681	0.896756	0.888828
GO:0042790	nucleolar large rRNA transcription by RNA polymerase I	11	0.540879	1.37036	0.109706	0.896756	0.888828
GO:0016079	synaptic vesicle exocytosis	78	0.323508	1.27148	0.109722	0.896756	0.888828
GO:0031639	plasminogen activation	21	0.447688	1.34814	0.110393	0.896756	0.888828
GO:0007099	centriole replication	25	0.426218	1.33811	0.110898	0.896756	0.888828
GO:0060004	reflex	17	-0.415671	-1.34836	0.110998	0.896756	0.888828
GO:0010613	positive regulation of cardiac muscle hypertrophy	25	-0.362876	-1.31505	0.111048	0.896756	0.888828
GO:0014742	positive regulation of muscle hypertrophy	25	-0.362876	-1.31505	0.111048	0.896756	0.888828
GO:0045472	response to ether	11	0.539802	1.36764	0.111276	0.896756	0.888828
GO:0030433	ubiquitin-dependent ERAD pathway	63	-0.272884	-1.23551	0.111398	0.896756	0.888828
GO:0046461	neutral lipid catabolic process	32	0.398482	1.32324	0.111708	0.896756	0.888828
GO:0046464	acylglycerol catabolic process	32	0.398482	1.32324	0.111708	0.896756	0.888828
GO:0002699	positive regulation of immune effector process	146	0.286816	1.22934	0.111763	0.896756	0.888828
GO:0071361	cellular response to ethanol	10	0.555055	1.36825	0.111765	0.896756	0.888828
GO:0002295	T-helper cell lineage commitment	14	0.501878	1.36025	0.112125	0.896756	0.888828
GO:0007080	mitotic metaphase plate congression	39	0.378453	1.31041	0.112295	0.896756	0.888828
GO:0032922	circadian regulation of gene expression	49	0.358063	1.29745	0.112402	0.896756	0.888828
GO:0072395	signal transduction involved in cell cycle checkpoint	73	0.327264	1.27243	0.112425	0.896756	0.888828
GO:0031333	negative regulation of protein complex assembly	115	0.298887	1.2436	0.11246	0.896756	0.888828
GO:0009404	toxin metabolic process	21	-0.384665	-1.32748	0.112506	0.896756	0.888828
GO:0006244	pyrimidine nucleotide catabolic process	11	0.538911	1.36538	0.112616	0.896756	0.888828
GO:0050885	neuromuscular process controlling balance	43	-0.304456	-1.26606	0.112851	0.896756	0.888828
GO:0038179	neurotrophin signaling pathway	36	0.385957	1.31439	0.11294	0.896756	0.888828
GO:0060840	artery development	78	-0.257202	-1.21517	0.113087	0.896756	0.888828
GO:1901021	positive regulation of calcium ion transmembrane transporter activity	30	0.404772	1.32494	0.113148	0.896756	0.888828
GO:0042267	natural killer cell mediated cytotoxicity	48	0.359416	1.2972	0.113227	0.896756	0.888828
GO:0035315	hair cell differentiation	40	-0.31097	-1.27091	0.113244	0.896756	0.888828
GO:0030099	myeloid cell differentiation	341	0.254235	1.17636	0.11344	0.896756	0.888828
GO:0003299	muscle hypertrophy in response to stress	21	0.445925	1.34283	0.113748	0.896756	0.888828
GO:0014887	cardiac muscle adaptation	21	0.445925	1.34283	0.113748	0.896756	0.888828
GO:0014898	cardiac muscle hypertrophy in response to stress	21	0.445925	1.34283	0.113748	0.896756	0.888828
GO:0030858	positive regulation of epithelial cell differentiation	54	0.349247	1.28879	0.114282	0.896756	0.888828
GO:0001569	branching involved in blood vessel morphogenesis	30	-0.339962	-1.29259	0.114798	0.896756	0.888828
GO:0006919	activation of cysteine-type endopeptidase activity involved in apoptotic process	77	0.32279	1.26595	0.114836	0.896756	0.888828
GO:0048147	negative regulation of fibroblast proliferation	26	0.41964	1.32951	0.115103	0.896756	0.888828
GO:0045745	positive regulation of G-protein coupled receptor protein signaling pathway	24	-0.366041	-1.31196	0.115233	0.896756	0.888828
GO:0006778	porphyrin-containing compound metabolic process	28	0.411186	1.32498	0.115576	0.896756	0.888828
GO:0002793	positive regulation of peptide secretion	221	0.268198	1.19995	0.115743	0.896756	0.888828
GO:0048675	axon extension	107	0.301878	1.24386	0.115852	0.896756	0.888828
GO:0046365	monosaccharide catabolic process	57	0.344292	1.2832	0.116003	0.896756	0.888828
GO:0034644	cellular response to UV	70	-0.263881	-1.2206	0.116082	0.896756	0.888828
GO:0032350	regulation of hormone metabolic process	26	0.419149	1.32796	0.116116	0.896756	0.888828
GO:0051646	mitochondrion localization	42	0.369851	1.30016	0.116388	0.896756	0.888828
GO:0015980	energy derivation by oxidation of organic compounds	223	0.267661	1.19856	0.116642	0.896756	0.888828
GO:0019511	peptidyl-proline hydroxylation	11	0.536066	1.35817	0.117135	0.896756	0.888828
GO:0031573	intra-S DNA damage checkpoint	10	-0.502285	-1.37604	0.117399	0.896756	0.888828
GO:0032784	regulation of DNA-templated transcription, elongation	38	-0.314498	-1.2696	0.11776	0.896756	0.888828
GO:0036295	cellular response to increased oxygen levels	13	0.509676	1.35344	0.117768	0.896756	0.888828
GO:0032868	response to insulin	231	0.266098	1.19541	0.117872	0.896756	0.888828
GO:0002521	leukocyte differentiation	403	0.248823	1.16286	0.117904	0.896756	0.888828
GO:0070633	transepithelial transport	16	0.479557	1.34666	0.11798	0.896756	0.888828
GO:0002092	positive regulation of receptor internalization	20	0.449705	1.33789	0.118	0.896756	0.888828
GO:0043497	regulation of protein heterodimerization activity	10	0.550978	1.3582	0.118023	0.896756	0.888828
GO:2001223	negative regulation of neuron migration	10	-0.501798	-1.3747	0.118052	0.896756	0.888828
GO:0032651	regulation of interleukin-1 beta production	50	0.354015	1.28759	0.118244	0.896756	0.888828
GO:0031050	dsRNA fragmentation	44	0.365001	1.29502	0.118271	0.896756	0.888828
GO:0070918	production of small RNA involved in gene silencing by RNA	44	0.365001	1.29502	0.118271	0.896756	0.888828
GO:0051956	negative regulation of amino acid transport	10	0.550737	1.35761	0.11844	0.896756	0.888828
GO:0060603	mammary gland duct morphogenesis	28	0.409827	1.3206	0.11862	0.896756	0.888828
GO:0048259	regulation of receptor-mediated endocytosis	69	0.329075	1.26778	0.118699	0.896756	0.888828
GO:0045672	positive regulation of osteoclast differentiation	17	0.470004	1.34113	0.119777	0.896756	0.888828
GO:0034199	activation of protein kinase A activity	16	0.47847	1.3436	0.119922	0.896756	0.888828
GO:0051131	chaperone-mediated protein complex assembly	17	0.469772	1.34047	0.120202	0.896756	0.888828
GO:0043255	regulation of carbohydrate biosynthetic process	68	0.329503	1.26637	0.120466	0.896756	0.888828
GO:0019471	4-hydroxyproline metabolic process	10	0.549384	1.35427	0.120555	0.896756	0.888828
GO:2000377	regulation of reactive oxygen species metabolic process	143	0.285587	1.22115	0.120864	0.896756	0.888828
GO:0033032	regulation of myeloid cell apoptotic process	25	0.421211	1.32239	0.121105	0.896756	0.888828
GO:1903146	regulation of autophagy of mitochondrion	45	0.361808	1.28947	0.121472	0.896756	0.888828
GO:0071478	cellular response to radiation	154	-0.218028	-1.15483	0.12195	0.896756	0.888828
GO:0007204	positive regulation of cytosolic calcium ion concentration	245	0.263219	1.18849	0.122097	0.896756	0.888828
GO:0000097	sulfur amino acid biosynthetic process	12	-0.465234	-1.35316	0.122161	0.896756	0.888828
GO:0009895	negative regulation of catabolic process	241	0.263768	1.18936	0.122209	0.896756	0.888828
GO:0044784	metaphase/anaphase transition of cell cycle	49	0.354181	1.28338	0.122598	0.896756	0.888828
GO:0010677	negative regulation of cellular carbohydrate metabolic process	31	0.396924	1.30881	0.122608	0.896756	0.888828
GO:0006835	dicarboxylic acid transport	80	0.3177	1.25388	0.122657	0.896756	0.888828
GO:0007631	feeding behavior	91	0.309457	1.24584	0.12297	0.896756	0.888828
GO:0048278	vesicle docking	63	0.334198	1.26782	0.123127	0.896756	0.888828
GO:0007611	learning or memory	214	0.267894	1.19515	0.123296	0.896756	0.888828
GO:0055072	iron ion homeostasis	80	0.317338	1.25246	0.123827	0.896756	0.888828
GO:0060158	phospholipase C-activating dopamine receptor signaling pathway	11	0.531718	1.34715	0.124128	0.896756	0.888828
GO:0045666	positive regulation of neuron differentiation	309	0.255323	1.17358	0.124131	0.896756	0.888828
GO:0048489	synaptic vesicle transport	107	0.299643	1.23465	0.1242	0.896756	0.888828
GO:0097480	establishment of synaptic vesicle localization	107	0.299643	1.23465	0.1242	0.896756	0.888828
GO:0050802	circadian sleep/wake cycle, sleep	22	0.434779	1.32416	0.124285	0.896756	0.888828
GO:1902692	regulation of neuroblast proliferation	23	0.429209	1.32128	0.124666	0.896756	0.888828
GO:0089718	amino acid import across plasma membrane	18	-0.400038	-1.31986	0.12471	0.896756	0.888828
GO:0006515	protein quality control for misfolded or incompletely synthesized proteins	23	0.428951	1.32049	0.125201	0.896756	0.888828
GO:0009205	purine ribonucleoside triphosphate metabolic process	254	0.261408	1.18383	0.12528	0.896756	0.888828
GO:0009410	response to xenobiotic stimulus	235	0.264042	1.18802	0.125672	0.896756	0.888828
GO:0007091	metaphase/anaphase transition of mitotic cell cycle	48	0.354702	1.28019	0.125732	0.896756	0.888828
GO:0046348	amino sugar catabolic process	14	0.493944	1.33875	0.12574	0.896756	0.888828
GO:1904668	positive regulation of ubiquitin protein ligase activity	10	0.546079	1.34613	0.125816	0.896756	0.888828
GO:0050714	positive regulation of protein secretion	201	0.269797	1.19655	0.125916	0.896756	0.888828
GO:0097120	receptor localization to synapse	32	0.392269	1.30261	0.125959	0.896756	0.888828
GO:0030049	muscle filament sliding	29	-0.338992	-1.27766	0.126353	0.896756	0.888828
GO:0033275	actin-myosin filament sliding	29	-0.338992	-1.27766	0.126353	0.896756	0.888828
GO:0032460	negative regulation of protein oligomerization	15	0.483822	1.3356	0.126359	0.896756	0.888828
GO:0051195	negative regulation of cofactor metabolic process	16	0.474696	1.33301	0.126661	0.896756	0.888828
GO:0001976	neurological system process involved in regulation of systemic arterial blood pressure	11	0.530173	1.34324	0.126746	0.896756	0.888828
GO:0002449	lymphocyte mediated immunity	180	0.274038	1.20207	0.12694	0.896756	0.888828
GO:0032386	regulation of intracellular transport	363	0.250264	1.16249	0.126942	0.896756	0.888828
GO:1905954	positive regulation of lipid localization	65	0.330553	1.2606	0.127375	0.896756	0.888828
GO:0007095	mitotic G2 DNA damage checkpoint	19	0.450653	1.32368	0.128266	0.896756	0.888828
GO:0033327	Leydig cell differentiation	10	-0.49443	-1.35451	0.128316	0.896756	0.888828
GO:0036151	phosphatidylcholine acyl-chain remodeling	23	0.427484	1.31597	0.128319	0.896756	0.888828
GO:0010965	regulation of mitotic sister chromatid separation	50	0.350327	1.27417	0.128441	0.896756	0.888828
GO:0002433	immune response-regulating cell surface receptor signaling pathway involved in phagocytosis	72	0.322966	1.25296	0.128716	0.896756	0.888828
GO:0038096	Fc-gamma receptor signaling pathway involved in phagocytosis	72	0.322966	1.25296	0.128716	0.896756	0.888828
GO:0006220	pyrimidine nucleotide metabolic process	41	0.367297	1.28491	0.128796	0.896756	0.888828
GO:2000194	regulation of female gonad development	11	0.528934	1.3401	0.128838	0.896756	0.888828
GO:0072503	cellular divalent inorganic cation homeostasis	386	0.248348	1.15785	0.128868	0.896756	0.888828
GO:0010743	regulation of macrophage derived foam cell differentiation	26	0.413042	1.30861	0.128893	0.896756	0.888828
GO:1901657	glycosyl compound metabolic process	132	0.287486	1.21735	0.129269	0.896756	0.888828
GO:0010817	regulation of hormone levels	440	0.244942	1.15009	0.129452	0.896756	0.888828
GO:0002675	positive regulation of acute inflammatory response	22	0.431904	1.3154	0.13006	0.896756	0.888828
GO:0050913	sensory perception of bitter taste	31	0.393837	1.29863	0.130118	0.896756	0.888828
GO:0051865	protein autoubiquitination	49	0.351332	1.27306	0.130341	0.896756	0.888828
GO:0031935	regulation of chromatin silencing	20	0.443289	1.3188	0.130567	0.896756	0.888828
GO:0033559	unsaturated fatty acid metabolic process	83	0.312971	1.2423	0.130627	0.896756	0.888828
GO:1903312	negative regulation of mRNA metabolic process	66	-0.264372	-1.20828	0.130768	0.896756	0.888828
GO:0046651	lymphocyte proliferation	211	0.266946	1.18932	0.13088	0.896756	0.888828
GO:0002460	adaptive immune response based on somatic recombination of immune receptors built from immunoglobulin superfamily domains	187	0.27167	1.19626	0.13105	0.896756	0.888828
GO:0071900	regulation of protein serine/threonine kinase activity	445	0.244427	1.14834	0.131165	0.896756	0.888828
GO:2000406	positive regulation of T cell migration	20	0.442916	1.31769	0.131333	0.896756	0.888828
GO:0032941	secretion by tissue	34	0.383838	1.29145	0.13135	0.896756	0.888828
GO:0048246	macrophage chemotaxis	26	0.411883	1.30494	0.131512	0.896756	0.888828
GO:0002087	regulation of respiratory gaseous exchange by neurological system process	11	0.527388	1.33618	0.131569	0.896756	0.888828
GO:0008608	attachment of spindle microtubules to kinetochore	28	0.403956	1.30168	0.131636	0.896756	0.888828
GO:0030178	negative regulation of Wnt signaling pathway	179	0.273212	1.1977	0.131956	0.896756	0.888828
GO:0060766	negative regulation of androgen receptor signaling pathway	12	0.51357	1.33362	0.132272	0.896756	0.888828
GO:0031341	regulation of cell killing	59	0.335996	1.26006	0.132433	0.896756	0.888828
GO:0019370	leukotriene biosynthetic process	14	0.489967	1.32797	0.133005	0.896756	0.888828
GO:0006957	complement activation, alternative pathway	11	0.526448	1.3338	0.133222	0.896756	0.888828
GO:0032732	positive regulation of interleukin-1 production	38	0.372573	1.28318	0.133356	0.896756	0.888828
GO:0060736	prostate gland growth	11	-0.473258	-1.33745	0.133529	0.896756	0.888828
GO:0007213	G-protein coupled acetylcholine receptor signaling pathway	15	0.480002	1.32506	0.133547	0.896756	0.888828
GO:0006654	phosphatidic acid biosynthetic process	32	0.38907	1.29198	0.13359	0.896756	0.888828
GO:0095500	acetylcholine receptor signaling pathway	20	0.441781	1.31432	0.133601	0.896756	0.888828
GO:1903831	signal transduction involved in cellular response to ammonium ion	20	0.441781	1.31432	0.133601	0.896756	0.888828
GO:1905144	response to acetylcholine	20	0.441781	1.31432	0.133601	0.896756	0.888828
GO:1905145	cellular response to acetylcholine	20	0.441781	1.31432	0.133601	0.896756	0.888828
GO:0002228	natural killer cell mediated immunity	50	0.348453	1.26736	0.133909	0.896756	0.888828
GO:0010171	body morphogenesis	45	0.35708	1.27262	0.134188	0.896756	0.888828
GO:0030277	maintenance of gastrointestinal epithelium	14	-0.432557	-1.32105	0.134456	0.896756	0.888828
GO:0070486	leukocyte aggregation	10	0.540833	1.3332	0.134608	0.896756	0.888828
GO:0060627	regulation of vesicle-mediated transport	428	0.244876	1.14812	0.134645	0.896756	0.888828
GO:0032885	regulation of polysaccharide biosynthetic process	28	0.402197	1.29601	0.135781	0.896756	0.888828
GO:0032467	positive regulation of cytokinesis	27	0.405905	1.29704	0.135928	0.896756	0.888828
GO:0015909	long-chain fatty acid transport	53	0.343105	1.26172	0.135978	0.896756	0.888828
GO:0048592	eye morphogenesis	130	0.286668	1.21157	0.136132	0.896756	0.888828
GO:0071479	cellular response to ionizing radiation	64	-0.265026	-1.20392	0.136464	0.896756	0.888828
GO:0070208	protein heterotrimerization	12	0.511213	1.32751	0.136465	0.896756	0.888828
GO:0042440	pigment metabolic process	54	0.341456	1.26004	0.136552	0.896756	0.888828
GO:0086002	cardiac muscle cell action potential involved in contraction	46	0.354339	1.26819	0.136748	0.896756	0.888828
GO:0071260	cellular response to mechanical stimulus	67	0.325469	1.24774	0.136924	0.896756	0.888828
GO:0006953	acute-phase response	37	0.373682	1.28004	0.136993	0.896756	0.888828
GO:1901659	glycosyl compound biosynthetic process	43	0.360015	1.27165	0.137031	0.896756	0.888828
GO:0045582	positive regulation of T cell differentiation	59	0.334476	1.25436	0.137136	0.896756	0.888828
GO:1902850	microtubule cytoskeleton organization involved in mitosis	116	0.29214	1.2169	0.137218	0.896756	0.888828
GO:0039702	viral budding via host ESCRT complex	18	0.452984	1.31194	0.137729	0.896756	0.888828
GO:0032886	regulation of microtubule-based process	176	0.272755	1.19359	0.137875	0.896756	0.888828
GO:0051181	cofactor transport	37	0.373374	1.27899	0.137877	0.896756	0.888828
GO:0023061	signal release	389	0.246825	1.15124	0.138257	0.896756	0.888828
GO:0006851	mitochondrial calcium ion transmembrane transport	21	0.433695	1.306	0.138312	0.896756	0.888828
GO:0043902	positive regulation of multi-organism process	154	-0.215608	-1.14202	0.138353	0.896756	0.888828
GO:0043535	regulation of blood vessel endothelial cell migration	83	-0.247492	-1.18317	0.13896	0.896756	0.888828
GO:0140029	exocytic process	72	0.319886	1.24101	0.139032	0.896756	0.888828
GO:0017001	antibiotic catabolic process	40	0.365671	1.27283	0.139166	0.896756	0.888828
GO:0055093	response to hyperoxia	19	0.445167	1.30757	0.139409	0.896756	0.888828
GO:0032098	regulation of appetite	21	0.433064	1.3041	0.139745	0.896756	0.888828
GO:0048145	regulation of fibroblast proliferation	73	0.318751	1.23933	0.139875	0.896756	0.888828
GO:0071621	granulocyte chemotaxis	76	0.316029	1.23686	0.140251	0.896756	0.888828
GO:1903319	positive regulation of protein maturation	24	0.417042	1.29679	0.140296	0.896756	0.888828
GO:2000378	negative regulation of reactive oxygen species metabolic process	46	0.353155	1.26396	0.140343	0.896756	0.888828
GO:2001021	negative regulation of response to DNA damage stimulus	66	-0.26196	-1.19726	0.140876	0.896756	0.888828
GO:0098534	centriole assembly	27	0.403495	1.28934	0.141481	0.896756	0.888828
GO:0032743	positive regulation of interleukin-2 production	23	-0.359812	-1.27401	0.141501	0.896756	0.888828
GO:0060856	establishment of blood-brain barrier	10	0.536886	1.32347	0.141539	0.896756	0.888828
GO:0019371	cyclooxygenase pathway	11	0.521763	1.32193	0.141552	0.896756	0.888828
GO:0032793	positive regulation of CREB transcription factor activity	14	0.485359	1.31548	0.141612	0.896756	0.888828
GO:0051403	stress-activated MAPK cascade	226	0.262506	1.17691	0.141756	0.896756	0.888828
GO:0000768	syncytium formation by plasma membrane fusion	44	0.356354	1.26434	0.141903	0.896756	0.888828
GO:0050890	cognition	244	0.259871	1.17297	0.142051	0.896756	0.888828
GO:0045637	regulation of myeloid cell differentiation	207	0.265569	1.18123	0.142206	0.896756	0.888828
GO:0009451	RNA modification	136	0.28313	1.20325	0.142403	0.896756	0.888828
GO:0051386	regulation of neurotrophin TRK receptor signaling pathway	10	0.53636	1.32217	0.142543	0.896756	0.888828
GO:0000422	autophagy of mitochondrion	76	0.315306	1.23403	0.142826	0.896756	0.888828
GO:0061726	mitochondrion disassembly	76	0.315306	1.23403	0.142826	0.896756	0.888828
GO:0018210	peptidyl-threonine modification	125	0.286995	1.20703	0.143039	0.896756	0.888828
GO:0060479	lung cell differentiation	20	-0.376384	-1.28093	0.143059	0.896756	0.888828
GO:0007625	grooming behavior	14	0.484573	1.31335	0.143125	0.896756	0.888828
GO:0009199	ribonucleoside triphosphate metabolic process	260	0.257581	1.16869	0.143206	0.896756	0.888828
GO:0032890	regulation of organic acid transport	47	0.350386	1.25941	0.143273	0.896756	0.888828
GO:0038061	NIK/NF-kappaB signaling	106	-0.232326	-1.16063	0.143482	0.896756	0.888828
GO:2001252	positive regulation of chromosome organization	148	0.27899	1.19773	0.143509	0.896756	0.888828
GO:0010824	regulation of centrosome duplication	35	0.376402	1.27415	0.14363	0.896756	0.888828
GO:1904951	positive regulation of establishment of protein localization	405	0.245057	1.1456	0.143765	0.896756	0.888828
GO:0015807	L-amino acid transport	55	-0.274406	-1.20674	0.144102	0.896756	0.888828
GO:0030100	regulation of endocytosis	206	0.265307	1.17952	0.144627	0.896756	0.888828
GO:0071398	cellular response to fatty acid	46	0.351624	1.25848	0.144991	0.896756	0.888828
GO:0046879	hormone secretion	274	0.255607	1.1646	0.145304	0.896756	0.888828
GO:0090068	positive regulation of cell cycle process	229	0.261401	1.17342	0.145534	0.896756	0.888828
GO:0046635	positive regulation of alpha-beta T cell activation	43	0.357012	1.26104	0.145621	0.896756	0.888828
GO:1903046	meiotic cell cycle process	142	0.280405	1.19797	0.145812	0.896756	0.888828
GO:0030501	positive regulation of bone mineralization	28	0.398016	1.28254	0.145925	0.896756	0.888828
GO:0060326	cell chemotaxis	208	0.264731	1.17803	0.146005	0.896756	0.888828
GO:0045820	negative regulation of glycolytic process	11	0.519253	1.31557	0.146036	0.896756	0.888828
GO:0051198	negative regulation of coenzyme metabolic process	11	0.519253	1.31557	0.146036	0.896756	0.888828
GO:0043373	CD4-positive, alpha-beta T cell lineage commitment	15	0.473397	1.30683	0.146097	0.896756	0.888828
GO:0007623	circadian rhythm	176	0.271145	1.18655	0.146167	0.896756	0.888828
GO:0001756	somitogenesis	56	0.335517	1.24636	0.146511	0.896756	0.888828
GO:0001890	placenta development	131	0.283893	1.20098	0.146859	0.896756	0.888828
GO:0090398	cellular senescence	58	0.332712	1.24394	0.146995	0.896756	0.888828
GO:0006883	cellular sodium ion homeostasis	14	0.482423	1.30752	0.147379	0.896756	0.888828
GO:0006641	triglyceride metabolic process	81	0.309946	1.22572	0.14743	0.896756	0.888828
GO:0001912	positive regulation of leukocyte mediated cytotoxicity	30	0.390044	1.27673	0.147648	0.896756	0.888828
GO:0035094	response to nicotine	37	0.369651	1.26623	0.147967	0.896756	0.888828
GO:0032652	regulation of interleukin-1 production	62	0.327624	1.23943	0.148003	0.896756	0.888828
GO:0048011	neurotrophin TRK receptor signaling pathway	25	0.409034	1.28416	0.148188	0.896756	0.888828
GO:0046148	pigment biosynthetic process	46	0.350577	1.25473	0.148248	0.896756	0.888828
GO:0046415	urate metabolic process	10	0.53304	1.31398	0.148438	0.896756	0.888828
GO:0006754	ATP biosynthetic process	121	0.28739	1.20361	0.148579	0.896756	0.888828
GO:0003198	epithelial to mesenchymal transition involved in endocardial cushion formation	15	-0.413944	-1.29198	0.148736	0.896756	0.888828
GO:0019835	cytolysis	27	0.400493	1.27974	0.148801	0.896756	0.888828
GO:2001171	positive regulation of ATP biosynthetic process	23	0.418139	1.2872	0.148908	0.896756	0.888828
GO:1903037	regulation of leukocyte cell-cell adhesion	244	0.258666	1.16753	0.149303	0.896756	0.888828
GO:0008203	cholesterol metabolic process	117	0.288906	1.20471	0.149326	0.896756	0.888828
GO:0031033	myosin filament organization	11	-0.463733	-1.31053	0.149453	0.896756	0.888828
GO:0045922	negative regulation of fatty acid metabolic process	20	0.434346	1.2922	0.149495	0.896756	0.888828
GO:0006112	energy reserve metabolic process	71	0.317844	1.23006	0.149654	0.896756	0.888828
GO:0033344	cholesterol efflux	35	0.374129	1.26646	0.14969	0.896756	0.888828
GO:0030239	myofibril assembly	58	-0.269199	-1.19739	0.149726	0.896756	0.888828
GO:0030007	cellular potassium ion homeostasis	11	0.517299	1.31062	0.149797	0.896756	0.888828
GO:0010560	positive regulation of glycoprotein biosynthetic process	17	0.45464	1.29729	0.149798	0.896756	0.888828
GO:0051642	centrosome localization	21	-0.367306	-1.26758	0.149803	0.896756	0.888828
GO:0038127	ERBB signaling pathway	137	0.281185	1.19603	0.149827	0.896756	0.888828
GO:0007588	excretion	54	0.337272	1.2446	0.149937	0.896756	0.888828
GO:0045742	positive regulation of epidermal growth factor receptor signaling pathway	31	0.385751	1.27197	0.150132	0.896756	0.888828
GO:0061458	reproductive system development	367	0.246651	1.14646	0.150169	0.896756	0.888828
GO:0042983	amyloid precursor protein biosynthetic process	10	0.532064	1.31158	0.150218	0.896756	0.888828
GO:0042984	regulation of amyloid precursor protein biosynthetic process	10	0.532064	1.31158	0.150218	0.896756	0.888828
GO:0002042	cell migration involved in sprouting angiogenesis	49	-0.281777	-1.20791	0.150255	0.896756	0.888828
GO:0043123	positive regulation of I-kappaB kinase/NF-kappaB signaling	137	0.2811	1.19567	0.150273	0.896756	0.888828
GO:0043368	positive T cell selection	30	0.388872	1.2729	0.150636	0.896756	0.888828
GO:0045445	myoblast differentiation	72	0.31646	1.22772	0.151109	0.896756	0.888828
GO:1904181	positive regulation of membrane depolarization	10	0.531515	1.31023	0.151198	0.896756	0.888828
GO:0030500	regulation of bone mineralization	57	0.332658	1.23984	0.15162	0.896756	0.888828
GO:0016999	antibiotic metabolic process	118	0.287931	1.20195	0.151785	0.896756	0.888828
GO:0033762	response to glucagon	44	0.352938	1.25222	0.152002	0.896756	0.888828
GO:0070228	regulation of lymphocyte apoptotic process	47	0.34742	1.24875	0.152405	0.896756	0.888828
GO:0006047	UDP-N-acetylglucosamine metabolic process	13	0.490509	1.30255	0.152581	0.896756	0.888828
GO:0002347	response to tumor cell	20	0.432955	1.28806	0.152615	0.896756	0.888828
GO:0014029	neural crest formation	11	0.515751	1.3067	0.15269	0.896756	0.888828
GO:0060433	bronchus development	10	-0.478713	-1.31146	0.152736	0.896756	0.888828
GO:0071379	cellular response to prostaglandin stimulus	19	0.439	1.28945	0.152741	0.896756	0.888828
GO:1905898	positive regulation of response to endoplasmic reticulum stress	36	0.370367	1.2613	0.152746	0.896756	0.888828
GO:0010594	regulation of endothelial cell migration	135	-0.219306	-1.13915	0.152779	0.896756	0.888828
GO:0022600	digestive system process	78	0.310942	1.22209	0.152782	0.896756	0.888828
GO:0035987	endodermal cell differentiation	42	0.356494	1.2532	0.153065	0.896756	0.888828
GO:0021953	central nervous system neuron differentiation	155	0.275044	1.18714	0.153136	0.896756	0.888828
GO:2000193	positive regulation of fatty acid transport	14	0.479525	1.29967	0.153156	0.896756	0.888828
GO:0042228	interleukin-8 biosynthetic process	11	0.515434	1.3059	0.153308	0.896756	0.888828
GO:0072539	T-helper 17 cell differentiation	18	0.445669	1.29075	0.15332	0.896756	0.888828
GO:0002286	T cell activation involved in immune response	71	0.316815	1.22608	0.153343	0.896756	0.888828
GO:0032048	cardiolipin metabolic process	12	-0.446742	-1.29937	0.153343	0.896756	0.888828
GO:0140013	meiotic nuclear division	129	0.283227	1.19597	0.153471	0.896756	0.888828
GO:2001056	positive regulation of cysteine-type endopeptidase activity	125	0.284683	1.19731	0.153679	0.896756	0.888828
GO:0060997	dendritic spine morphogenesis	49	0.343556	1.24488	0.153961	0.896756	0.888828
GO:0072347	response to anesthetic	65	0.32263	1.23039	0.154109	0.896756	0.888828
GO:0006910	phagocytosis, recognition	15	-0.411216	-1.28347	0.154123	0.896756	0.888828
GO:0055088	lipid homeostasis	97	0.297631	1.20943	0.154175	0.896756	0.888828
GO:1990089	response to nerve growth factor	50	0.341789	1.24312	0.154251	0.896756	0.888828
GO:0002831	regulation of response to biotic stimulus	111	0.290351	1.20244	0.154301	0.896756	0.888828
GO:0036475	neuron death in response to oxidative stress	19	0.438237	1.28721	0.15437	0.896756	0.888828
GO:1903203	regulation of oxidative stress-induced neuron death	19	0.438237	1.28721	0.15437	0.896756	0.888828
GO:0043369	CD4-positive or CD8-positive, alpha-beta T cell lineage commitment	19	0.438192	1.28708	0.154466	0.896756	0.888828
GO:0044818	mitotic G2/M transition checkpoint	25	0.406473	1.27612	0.154519	0.896756	0.888828
GO:0000271	polysaccharide biosynthetic process	65	0.322504	1.22991	0.154582	0.896756	0.888828
GO:0010893	positive regulation of steroid biosynthetic process	10	0.529583	1.30546	0.154764	0.896756	0.888828
GO:2001024	negative regulation of response to drug	27	0.398082	1.27204	0.154873	0.896756	0.888828
GO:0015711	organic anion transport	396	0.244182	1.14005	0.154882	0.896756	0.888828
GO:0002070	epithelial cell maturation	13	0.489283	1.29929	0.154964	0.896756	0.888828
GO:0042537	benzene-containing compound metabolic process	20	0.431777	1.28456	0.15528	0.896756	0.888828
GO:0010165	response to X-ray	32	0.380659	1.26405	0.155343	0.896756	0.888828
GO:0045670	regulation of osteoclast differentiation	51	0.339876	1.24089	0.155573	0.896756	0.888828
GO:0072401	signal transduction involved in DNA integrity checkpoint	72	0.315258	1.22306	0.155665	0.896756	0.888828
GO:0072422	signal transduction involved in DNA damage checkpoint	72	0.315258	1.22306	0.155665	0.896756	0.888828
GO:0002456	T cell mediated immunity	68	0.319106	1.22641	0.155935	0.896756	0.888828
GO:0040020	regulation of meiotic nuclear division	19	0.437542	1.28517	0.155938	0.896756	0.888828
GO:0033045	regulation of sister chromatid segregation	68	0.319051	1.2262	0.156152	0.896756	0.888828
GO:0061081	positive regulation of myeloid leukocyte cytokine production involved in immune response	10	0.528846	1.30365	0.156207	0.896756	0.888828
GO:0003417	growth plate cartilage development	13	-0.43192	-1.2888	0.15646	0.896756	0.888828
GO:0006895	Golgi to endosome transport	17	0.451532	1.28842	0.15651	0.896756	0.888828
GO:0048663	neuron fate commitment	60	0.327407	1.23156	0.156727	0.896756	0.888828
GO:0009219	pyrimidine deoxyribonucleotide metabolic process	17	0.451395	1.28803	0.156821	0.896756	0.888828
GO:0032733	positive regulation of interleukin-10 production	27	0.397261	1.26942	0.156949	0.896756	0.888828
GO:0016558	protein import into peroxisome matrix	11	0.513427	1.30081	0.157111	0.896756	0.888828
GO:0071392	cellular response to estradiol stimulus	32	0.379907	1.26156	0.157369	0.896756	0.888828
GO:0034383	low-density lipoprotein particle clearance	31	-0.321133	-1.23117	0.15741	0.896756	0.888828
GO:0051493	regulation of cytoskeleton organization	437	0.241541	1.13369	0.157438	0.896756	0.888828
GO:1901186	positive regulation of ERBB signaling pathway	33	0.376894	1.25997	0.157523	0.896756	0.888828
GO:0007379	segment specification	14	0.47713	1.29318	0.158058	0.896756	0.888828
GO:0061001	regulation of dendritic spine morphogenesis	35	0.37114	1.25634	0.158125	0.896756	0.888828
GO:0007549	dosage compensation	13	0.487703	1.29509	0.158129	0.896756	0.888828
GO:0043508	negative regulation of JUN kinase activity	14	0.477013	1.29286	0.158301	0.896756	0.888828
GO:0021879	forebrain neuron differentiation	47	0.345501	1.24186	0.158377	0.896756	0.888828
GO:0022409	positive regulation of cell-cell adhesion	201	0.263813	1.17001	0.158751	0.896756	0.888828
GO:1901836	regulation of transcription of nucleolar large rRNA by RNA polymerase I	10	0.527488	1.3003	0.158816	0.896756	0.888828
GO:0070816	phosphorylation of RNA polymerase II C-terminal domain	16	-0.39988	-1.27315	0.158994	0.896756	0.888828
GO:0042446	hormone biosynthetic process	72	0.314357	1.21957	0.15908	0.896756	0.888828
GO:0045624	positive regulation of T-helper cell differentiation	17	0.450317	1.28495	0.159178	0.896756	0.888828
GO:0050775	positive regulation of dendrite morphogenesis	28	0.392771	1.26564	0.159239	0.896756	0.888828
GO:0042491	inner ear auditory receptor cell differentiation	33	-0.314124	-1.22378	0.159479	0.896756	0.888828
GO:0032465	regulation of cytokinesis	67	0.31909	1.22328	0.159542	0.896756	0.888828
GO:0048311	mitochondrion distribution	16	0.45817	1.2866	0.159565	0.896756	0.888828
GO:0043113	receptor clustering	44	0.350501	1.24357	0.159665	0.896756	0.888828
GO:0019218	regulation of steroid metabolic process	91	-0.238372	-1.15826	0.159751	0.896756	0.888828
GO:0097306	cellular response to alcohol	49	0.341727	1.23825	0.159869	0.896756	0.888828
GO:0046629	gamma-delta T cell activation	10	0.526673	1.29829	0.160375	0.896756	0.888828
GO:0001945	lymph vessel development	23	0.413226	1.27208	0.160563	0.896756	0.888828
GO:0051882	mitochondrial depolarization	20	0.429495	1.27776	0.160571	0.896756	0.888828
GO:0006911	phagocytosis, engulfment	37	0.365023	1.25038	0.161109	0.896756	0.888828
GO:0031034	myosin filament assembly	10	-0.473594	-1.29743	0.161242	0.896756	0.888828
GO:0007596	blood coagulation	286	0.251845	1.15118	0.161581	0.896756	0.888828
GO:0071887	leukocyte apoptotic process	92	0.298835	1.20505	0.161785	0.896756	0.888828
GO:0021670	lateral ventricle development	10	0.525663	1.2958	0.16228	0.896756	0.888828
GO:0051306	mitotic sister chromatid separation	52	0.336281	1.23215	0.162569	0.896756	0.888828
GO:0034605	cellular response to heat	114	0.287281	1.19397	0.162701	0.896756	0.888828
GO:0032943	mononuclear cell proliferation	213	0.261051	1.16412	0.162788	0.896756	0.888828
GO:0000209	protein polyubiquitination	268	0.253612	1.15346	0.162806	0.896756	0.888828
GO:0008643	carbohydrate transport	124	0.283139	1.1896	0.162834	0.896756	0.888828
GO:0072643	interferon-gamma secretion	16	-0.397999	-1.26716	0.163158	0.896756	0.888828
GO:1905517	macrophage migration	29	0.387528	1.25865	0.163461	0.896756	0.888828
GO:0006586	indolalkylamine metabolic process	14	0.474485	1.28601	0.163567	0.896756	0.888828
GO:1902105	regulation of leukocyte differentiation	215	0.260567	1.16294	0.163706	0.896756	0.888828
GO:0048853	forebrain morphogenesis	12	-0.440956	-1.28254	0.163911	0.896756	0.888828
GO:0048103	somatic stem cell division	21	-0.361429	-1.2473	0.164635	0.896756	0.888828
GO:2000648	positive regulation of stem cell proliferation	31	0.380455	1.2545	0.164691	0.896756	0.888828
GO:0021544	subpallium development	23	-0.35068	-1.24168	0.164797	0.896756	0.888828
GO:0042403	thyroid hormone metabolic process	15	0.464464	1.28217	0.164921	0.896756	0.888828
GO:0035455	response to interferon-alpha	18	-0.38099	-1.25701	0.165048	0.896756	0.888828
GO:0040029	regulation of gene expression, epigenetic	292	0.250772	1.14802	0.165185	0.896756	0.888828
GO:0033033	negative regulation of myeloid cell apoptotic process	13	0.484231	1.28587	0.165256	0.896756	0.888828
GO:0014888	striated muscle adaptation	37	0.363541	1.2453	0.165552	0.896756	0.888828
GO:0032656	regulation of interleukin-13 production	15	0.464029	1.28097	0.165864	0.896756	0.888828
GO:0009123	nucleoside monophosphate metabolic process	296	0.250306	1.14699	0.165923	0.896756	0.888828
GO:0005976	polysaccharide metabolic process	90	0.299108	1.2022	0.165996	0.896756	0.888828
GO:0070482	response to oxygen levels	333	0.247092	1.14151	0.166041	0.896756	0.888828
GO:0034086	maintenance of sister chromatid cohesion	11	0.508783	1.28905	0.166116	0.896756	0.888828
GO:0034088	maintenance of mitotic sister chromatid cohesion	11	0.508783	1.28905	0.166116	0.896756	0.888828
GO:0002292	T cell differentiation involved in immune response	50	0.338185	1.23001	0.1662	0.896756	0.888828
GO:0032691	negative regulation of interleukin-1 beta production	15	0.463812	1.28037	0.166358	0.896756	0.888828
GO:0009109	coenzyme catabolic process	12	-0.439621	-1.27866	0.166467	0.896756	0.888828
GO:0032633	interleukin-4 production	29	-0.324822	-1.22425	0.166597	0.896756	0.888828
GO:0016055	Wnt signaling pathway	437	0.240424	1.12845	0.166778	0.896756	0.888828
GO:0033280	response to vitamin D	33	0.373601	1.24896	0.166935	0.896756	0.888828
GO:0042220	response to cocaine	43	0.349916	1.23598	0.167362	0.896756	0.888828
GO:0021548	pons development	10	-0.470084	-1.28782	0.16759	0.896756	0.888828
GO:0044849	estrous cycle	12	0.494863	1.28505	0.16765	0.896756	0.888828
GO:0007435	salivary gland morphogenesis	31	-0.31795	-1.21897	0.167761	0.896756	0.888828
GO:0045598	regulation of fat cell differentiation	95	0.295585	1.19756	0.16816	0.896756	0.888828
GO:0035461	vitamin transmembrane transport	11	-0.453258	-1.28093	0.168305	0.896756	0.888828
GO:0002690	positive regulation of leukocyte chemotaxis	68	0.315775	1.21361	0.168375	0.896756	0.888828
GO:0090026	positive regulation of monocyte chemotaxis	12	0.494493	1.28409	0.168426	0.896756	0.888828
GO:0002755	MyD88-dependent toll-like receptor signaling pathway	32	0.375873	1.24816	0.168686	0.896756	0.888828
GO:0045064	T-helper 2 cell differentiation	13	0.482565	1.28145	0.168734	0.896756	0.888828
GO:0048641	regulation of skeletal muscle tissue development	46	0.344037	1.23132	0.168958	0.896756	0.888828
GO:1902652	secondary alcohol metabolic process	121	0.283067	1.18551	0.169079	0.896756	0.888828
GO:0021781	glial cell fate commitment	12	-0.438286	-1.27478	0.169108	0.896756	0.888828
GO:0051382	kinetochore assembly	14	0.471869	1.27892	0.169148	0.896756	0.888828
GO:2000058	regulation of ubiquitin-dependent protein catabolic process	130	0.279645	1.18189	0.169243	0.896756	0.888828
GO:0070911	global genome nucleotide-excision repair	26	0.396379	1.25582	0.169285	0.896756	0.888828
GO:2001257	regulation of cation channel activity	138	0.277003	1.17934	0.169335	0.896756	0.888828
GO:0031330	negative regulation of cellular catabolic process	204	0.261527	1.1616	0.169433	0.896756	0.888828
GO:0030808	regulation of nucleotide biosynthetic process	129	0.279937	1.18208	0.169571	0.896756	0.888828
GO:1900371	regulation of purine nucleotide biosynthetic process	129	0.279937	1.18208	0.169571	0.896756	0.888828
GO:0098739	import across plasma membrane	64	-0.257903	-1.17156	0.169695	0.896756	0.888828
GO:0071340	skeletal muscle acetylcholine-gated channel clustering	10	0.521802	1.28628	0.169713	0.896756	0.888828
GO:1901655	cellular response to ketone	79	0.305724	1.2042	0.170183	0.896756	0.888828
GO:0030431	sleep	31	0.378463	1.24793	0.170203	0.896756	0.888828
GO:0032731	positive regulation of interleukin-1 beta production	32	0.375332	1.24637	0.170224	0.896756	0.888828
GO:0030098	lymphocyte differentiation	274	0.251871	1.14758	0.170359	0.896756	0.888828
GO:1902749	regulation of cell cycle G2/M phase transition	181	0.265727	1.16627	0.170391	0.896756	0.888828
GO:0009111	vitamin catabolic process	10	-0.468508	-1.2835	0.170404	0.896756	0.888828
GO:0015908	fatty acid transport	75	0.308842	1.20613	0.170789	0.896756	0.888828
GO:0046755	viral budding	21	0.419521	1.26332	0.170831	0.896756	0.888828
GO:0033262	regulation of nuclear cell cycle DNA replication	12	0.493282	1.28094	0.170926	0.896756	0.888828
GO:1904705	regulation of vascular smooth muscle cell proliferation	37	-0.300172	-1.20371	0.17098	0.896756	0.888828
GO:1990874	vascular smooth muscle cell proliferation	37	-0.300172	-1.20371	0.17098	0.896756	0.888828
GO:0033028	myeloid cell apoptotic process	29	0.384778	1.24972	0.171039	0.896756	0.888828
GO:0099172	presynapse organization	19	0.431086	1.26621	0.171079	0.896756	0.888828
GO:0018107	peptidyl-threonine phosphorylation	111	0.286743	1.18749	0.171201	0.896756	0.888828
GO:0099601	regulation of neurotransmitter receptor activity	41	0.352743	1.23399	0.171277	0.896756	0.888828
GO:0000578	embryonic axis specification	21	0.419263	1.26254	0.171486	0.896756	0.888828
GO:0043618	regulation of transcription from RNA polymerase II promoter in response to stress	104	-0.22898	-1.14002	0.17152	0.896756	0.888828
GO:2000050	regulation of non-canonical Wnt signaling pathway	19	0.430895	1.26565	0.171586	0.896756	0.888828
GO:0000712	resolution of meiotic recombination intermediates	11	-0.451501	-1.27596	0.171666	0.896756	0.888828
GO:0046320	regulation of fatty acid oxidation	26	0.39547	1.25294	0.171782	0.896756	0.888828
GO:0031098	stress-activated protein kinase signaling cascade	251	0.25424	1.15026	0.171842	0.896756	0.888828
GO:1901317	regulation of flagellated sperm motility	11	-0.451311	-1.27542	0.172027	0.896756	0.888828
GO:0070059	intrinsic apoptotic signaling pathway in response to endoplasmic reticulum stress	56	0.328136	1.21894	0.172132	0.896756	0.888828
GO:0045638	negative regulation of myeloid cell differentiation	73	0.31	1.2053	0.172849	0.896756	0.888828
GO:0007096	regulation of exit from mitosis	17	0.444272	1.2677	0.172877	0.896756	0.888828
GO:0042475	odontogenesis of dentin-containing tooth	69	0.313597	1.20815	0.172948	0.896756	0.888828
GO:0000077	DNA damage checkpoint	132	0.278215	1.17809	0.173041	0.896756	0.888828
GO:0050795	regulation of behavior	58	0.32531	1.21627	0.173056	0.896756	0.888828
GO:0000226	microtubule cytoskeleton organization	454	0.238841	1.12327	0.173113	0.896756	0.888828
GO:0030318	melanocyte differentiation	22	0.413196	1.25843	0.1732	0.896756	0.888828
GO:0003091	renal water homeostasis	31	0.377363	1.24431	0.173278	0.896756	0.888828
GO:1903358	regulation of Golgi organization	14	0.469845	1.27343	0.173371	0.896756	0.888828
GO:2000107	negative regulation of leukocyte apoptotic process	43	0.348022	1.22928	0.173389	0.896756	0.888828
GO:0051231	spindle elongation	11	0.504883	1.27916	0.173908	0.896756	0.888828
GO:0070536	protein K63-linked deubiquitination	27	0.390796	1.24876	0.174037	0.896756	0.888828
GO:0019674	NAD metabolic process	60	0.322543	1.21326	0.17434	0.896756	0.888828
GO:0032305	positive regulation of icosanoid secretion	13	0.479787	1.27407	0.174625	0.896756	0.888828
GO:0072574	hepatocyte proliferation	15	0.459876	1.2695	0.174917	0.896756	0.888828
GO:0072575	epithelial cell proliferation involved in liver morphogenesis	15	0.459876	1.2695	0.174917	0.896756	0.888828
GO:0006089	lactate metabolic process	12	0.491285	1.27576	0.174983	0.896756	0.888828
GO:1905818	regulation of chromosome separation	54	0.32996	1.21762	0.175015	0.896756	0.888828
GO:1902099	regulation of metaphase/anaphase transition of cell cycle	46	0.342232	1.22486	0.175056	0.896756	0.888828
GO:0009798	axis specification	70	0.312035	1.2048	0.175496	0.896756	0.888828
GO:0051781	positive regulation of cell division	66	0.315812	1.20744	0.17552	0.896756	0.888828
GO:0046850	regulation of bone remodeling	40	0.35345	1.23029	0.175711	0.896756	0.888828
GO:0002705	positive regulation of leukocyte mediated immunity	82	0.302174	1.19722	0.175784	0.896756	0.888828
GO:0070828	heterochromatin organization	15	0.459441	1.2683	0.175876	0.896756	0.888828
GO:0014074	response to purine-containing compound	131	0.278004	1.17607	0.175946	0.896756	0.888828
GO:0002697	regulation of immune effector process	283	0.250121	1.14241	0.176265	0.896756	0.888828
GO:0045071	negative regulation of viral genome replication	49	-0.275467	-1.18086	0.176554	0.896756	0.888828
GO:0009855	determination of bilateral symmetry	109	0.28659	1.18384	0.176557	0.896756	0.888828
GO:0090090	negative regulation of canonical Wnt signaling pathway	149	0.272324	1.17002	0.176659	0.896756	0.888828
GO:0072540	T-helper 17 cell lineage commitment	11	0.503485	1.27562	0.17669	0.896756	0.888828
GO:0048672	positive regulation of collateral sprouting	11	-0.448712	-1.26808	0.177129	0.896756	0.888828
GO:0051127	positive regulation of actin nucleation	14	0.468045	1.26855	0.177132	0.896756	0.888828
GO:0006595	polyamine metabolic process	15	-0.400417	-1.24976	0.177688	0.896756	0.888828
GO:0007189	adenylate cyclase-activating G-protein coupled receptor signaling pathway	84	0.30031	1.19437	0.17802	0.896756	0.888828
GO:0038084	vascular endothelial growth factor signaling pathway	27	0.389313	1.24402	0.178143	0.896756	0.888828
GO:0021602	cranial nerve morphogenesis	24	-0.341053	-1.2224	0.178198	0.896756	0.888828
GO:0020027	hemoglobin metabolic process	13	0.478157	1.26975	0.178209	0.896756	0.888828
GO:0198738	cell-cell signaling by wnt	439	0.23901	1.12209	0.178325	0.896756	0.888828
GO:0097186	amelogenesis	17	0.441938	1.26104	0.178424	0.896756	0.888828
GO:0002275	myeloid cell activation involved in immune response	454	0.23825	1.12049	0.178462	0.896756	0.888828
GO:0002762	negative regulation of myeloid leukocyte differentiation	41	0.350499	1.22615	0.178516	0.896756	0.888828
GO:0009615	response to virus	261	0.25211	1.14421	0.178589	0.896756	0.888828
GO:0030071	regulation of mitotic metaphase/anaphase transition	45	0.342776	1.22164	0.178704	0.896756	0.888828
GO:0001963	synaptic transmission, dopaminergic	27	0.389088	1.2433	0.17878	0.896756	0.888828
GO:1903214	regulation of protein targeting to mitochondrion	87	0.298031	1.19166	0.179134	0.896756	0.888828
GO:0001562	response to protozoan	16	0.449342	1.26181	0.179334	0.896756	0.888828
GO:0048199	vesicle targeting, to, from or within Golgi	67	0.313916	1.20345	0.17934	0.896756	0.888828
GO:1901522	positive regulation of transcription from RNA polymerase II promoter involved in cellular response to chemical stimulus	20	0.421604	1.25429	0.179476	0.896756	0.888828
GO:0036109	alpha-linolenic acid metabolic process	12	0.489079	1.27003	0.179496	0.896756	0.888828
GO:0032388	positive regulation of intracellular transport	218	0.257648	1.15131	0.179522	0.896756	0.888828
GO:0000002	mitochondrial genome maintenance	24	0.401123	1.24729	0.179547	0.896756	0.888828
GO:0070365	hepatocyte differentiation	14	0.466863	1.26535	0.179589	0.896756	0.888828
GO:0010998	regulation of translational initiation by eIF2 alpha phosphorylation	10	-0.463449	-1.26964	0.179601	0.896756	0.888828
GO:0003341	cilium movement	61	0.320015	1.20718	0.179698	0.896756	0.888828
GO:0009649	entrainment of circadian clock	23	0.405635	1.24871	0.179777	0.896756	0.888828
GO:0071453	cellular response to oxygen levels	192	0.26205	1.15692	0.179803	0.896756	0.888828
GO:0000185	activation of MAPKKK activity	14	-0.409793	-1.25152	0.179941	0.896756	0.888828
GO:0042036	negative regulation of cytokine biosynthetic process	29	0.381607	1.23942	0.179974	0.896756	0.888828
GO:0002221	pattern recognition receptor signaling pathway	147	0.272322	1.1682	0.180062	0.896756	0.888828
GO:0006275	regulation of DNA replication	109	0.285874	1.18088	0.180078	0.896756	0.888828
GO:0008209	androgen metabolic process	25	-0.336008	-1.21769	0.180154	0.896756	0.888828
GO:0001580	detection of chemical stimulus involved in sensory perception of bitter taste	27	0.388564	1.24163	0.180217	0.896756	0.888828
GO:0019320	hexose catabolic process	48	0.337341	1.21753	0.180303	0.896756	0.888828
GO:0000722	telomere maintenance via recombination	13	0.477153	1.26708	0.180333	0.896756	0.888828
GO:0051494	negative regulation of cytoskeleton organization	121	0.280838	1.17617	0.180391	0.896756	0.888828
GO:1901570	fatty acid derivative biosynthetic process	75	0.306418	1.19667	0.180656	0.896756	0.888828
GO:0007369	gastrulation	159	0.268847	1.16363	0.181343	0.896756	0.888828
GO:0009223	pyrimidine deoxyribonucleotide catabolic process	10	0.515964	1.27189	0.181423	0.896756	0.888828
GO:0060996	dendritic spine development	83	0.300152	1.19142	0.181559	0.896756	0.888828
GO:0015914	phospholipid transport	56	0.325521	1.20923	0.181716	0.896756	0.888828
GO:0051602	response to electrical stimulus	40	0.351578	1.22377	0.181736	0.896756	0.888828
GO:0033108	mitochondrial respiratory chain complex assembly	76	0.305391	1.19523	0.181739	0.896756	0.888828
GO:1905521	regulation of macrophage migration	17	0.440489	1.25691	0.181846	0.896756	0.888828
GO:0009395	phospholipid catabolic process	32	0.371357	1.23317	0.181919	0.896756	0.888828
GO:0070243	regulation of thymocyte apoptotic process	10	0.515627	1.27106	0.182091	0.896756	0.888828
GO:0098742	cell-cell adhesion via plasma-membrane adhesion molecules	199	-0.20044	-1.09998	0.18236	0.896756	0.888828
GO:0003085	negative regulation of systemic arterial blood pressure	12	0.487746	1.26657	0.182375	0.896756	0.888828
GO:0050863	regulation of T cell activation	265	0.251142	1.14124	0.182398	0.896756	0.888828
GO:0034219	carbohydrate transmembrane transport	102	0.288743	1.18173	0.182455	0.896756	0.888828
GO:0043410	positive regulation of MAPK cascade	460	0.237531	1.1179	0.182649	0.896756	0.888828
GO:0001709	cell fate determination	35	0.362794	1.22809	0.182906	0.896756	0.888828
GO:0032602	chemokine production	68	0.312025	1.19919	0.18315	0.896756	0.888828
GO:0035728	response to hepatocyte growth factor	13	-0.418998	-1.25025	0.183169	0.896756	0.888828
GO:0050853	B cell receptor signaling pathway	47	0.338079	1.21518	0.1833	0.896756	0.888828
GO:0044060	regulation of endocrine process	40	0.351052	1.22194	0.183468	0.896756	0.888828
GO:0042308	negative regulation of protein import into nucleus	10	-0.461284	-1.26371	0.183683	0.896756	0.888828
GO:1904590	negative regulation of protein import	10	-0.461284	-1.26371	0.183683	0.896756	0.888828
GO:0044065	regulation of respiratory system process	13	0.47562	1.26301	0.183736	0.896756	0.888828
GO:0043552	positive regulation of phosphatidylinositol 3-kinase activity	27	0.387199	1.23726	0.183857	0.896756	0.888828
GO:0042754	negative regulation of circadian rhythm	14	0.464959	1.26019	0.183911	0.896756	0.888828
GO:0006006	glucose metabolic process	168	0.266196	1.15918	0.184326	0.897702	0.889765
GO:0010950	positive regulation of endopeptidase activity	147	0.271537	1.16484	0.184413	0.897702	0.889765
GO:0071731	response to nitric oxide	17	0.439185	1.25319	0.184919	0.898991	0.891043
GO:1903039	positive regulation of leukocyte cell-cell adhesion	176	0.264327	1.15671	0.184987	0.898991	0.891043
GO:0070570	regulation of neuron projection regeneration	26	0.390564	1.23739	0.185142	0.898998	0.891049
GO:0090329	regulation of DNA-dependent DNA replication	44	0.342611	1.21558	0.185462	0.899798	0.891843
GO:0071732	cellular response to nitric oxide	14	0.464125	1.25793	0.185896	0.900337	0.892377
GO:0048144	fibroblast proliferation	74	0.305863	1.19185	0.186485	0.900337	0.892377
GO:0002761	regulation of myeloid leukocyte differentiation	95	0.291547	1.1812	0.186593	0.900337	0.892377
GO:0032869	cellular response to insulin stimulus	185	0.262269	1.15353	0.186803	0.900337	0.892377
GO:0010559	regulation of glycoprotein biosynthetic process	33	0.366867	1.22644	0.186954	0.900337	0.892377
GO:0033522	histone H2A ubiquitination	22	0.407807	1.24202	0.187357	0.900337	0.892377
GO:0097581	lamellipodium organization	70	0.309098	1.19346	0.187515	0.900337	0.892377
GO:0048505	regulation of timing of cell differentiation	12	-0.429262	-1.24853	0.187568	0.900337	0.892377
GO:0010675	regulation of cellular carbohydrate metabolic process	106	0.285741	1.17581	0.187892	0.900337	0.892377
GO:0043171	peptide catabolic process	25	0.393608	1.23573	0.188171	0.900337	0.892377
GO:0048265	response to pain	23	0.402415	1.2388	0.188324	0.900337	0.892377
GO:0009125	nucleoside monophosphate catabolic process	10	0.512469	1.26328	0.188533	0.900337	0.892377
GO:0034311	diol metabolic process	16	0.445331	1.25055	0.188651	0.900337	0.892377
GO:0009127	purine nucleoside monophosphate biosynthetic process	143	0.271912	1.16267	0.188685	0.900337	0.892377
GO:0009168	purine ribonucleoside monophosphate biosynthetic process	143	0.271912	1.16267	0.188685	0.900337	0.892377
GO:0002444	myeloid leukocyte mediated immunity	456	0.237068	1.11517	0.188815	0.900337	0.892377
GO:0055090	acylglycerol homeostasis	25	0.393259	1.23463	0.189086	0.900337	0.892377
GO:0070328	triglyceride homeostasis	25	0.393259	1.23463	0.189086	0.900337	0.892377
GO:1902041	regulation of extrinsic apoptotic signaling pathway via death domain receptors	45	0.339811	1.21107	0.189094	0.900337	0.892377
GO:0030812	negative regulation of nucleotide catabolic process	13	0.473203	1.25659	0.189127	0.900337	0.892377
GO:0051938	L-glutamate import	11	-0.442559	-1.25069	0.189406	0.900337	0.892377
GO:1901072	glucosamine-containing compound catabolic process	10	0.512004	1.26213	0.189454	0.900337	0.892377
GO:0043281	regulation of cysteine-type endopeptidase activity involved in apoptotic process	190	0.260867	1.15052	0.189488	0.900337	0.892377
GO:0010561	negative regulation of glycoprotein biosynthetic process	10	0.511972	1.26205	0.18952	0.900337	0.892377
GO:0050849	negative regulation of calcium-mediated signaling	15	-0.395366	-1.234	0.189687	0.900337	0.892377
GO:0030816	positive regulation of cAMP metabolic process	30	-0.314385	-1.19534	0.189712	0.900337	0.892377
GO:0072507	divalent inorganic cation homeostasis	401	0.239732	1.12005	0.189817	0.900337	0.892377
GO:1900182	positive regulation of protein localization to nucleus	60	0.318408	1.1977	0.190306	0.900337	0.892377
GO:0048608	reproductive structure development	364	0.241813	1.12342	0.190598	0.900337	0.892377
GO:2001026	regulation of endothelial cell chemotaxis	18	0.42966	1.24439	0.190647	0.900337	0.892377
GO:1990126	retrograde transport, endosome to plasma membrane	15	-0.394908	-1.23257	0.190742	0.900337	0.892377
GO:0009799	specification of symmetry	110	0.283257	1.17155	0.190842	0.900337	0.892377
GO:0033260	nuclear DNA replication	44	0.341019	1.20993	0.19098	0.900337	0.892377
GO:1902893	regulation of pri-miRNA transcription by RNA polymerase II	30	0.374445	1.22567	0.191107	0.900337	0.892377
GO:0099504	synaptic vesicle cycle	120	0.279154	1.16786	0.191232	0.900337	0.892377
GO:0006107	oxaloacetate metabolic process	12	0.483605	1.25581	0.191391	0.900337	0.892377
GO:0046349	amino sugar biosynthetic process	12	0.483558	1.25569	0.191476	0.900337	0.892377
GO:0032206	positive regulation of telomere maintenance	47	0.335756	1.20683	0.191516	0.900337	0.892377
GO:0002753	cytoplasmic pattern recognition receptor signaling pathway	53	0.32659	1.20099	0.192026	0.900337	0.892377
GO:0009415	response to water	12	0.483219	1.25481	0.192242	0.900337	0.892377
GO:0045604	regulation of epidermal cell differentiation	50	0.330763	1.20302	0.192289	0.900337	0.892377
GO:0034599	cellular response to oxidative stress	241	0.252589	1.13895	0.192507	0.900337	0.892377
GO:0021697	cerebellar cortex formation	19	0.42227	1.24031	0.192924	0.900337	0.892377
GO:0050920	regulation of chemotaxis	165	0.26547	1.15379	0.192934	0.900337	0.892377
GO:0002706	regulation of lymphocyte mediated immunity	105	0.285162	1.17186	0.192938	0.900337	0.892377
GO:0040034	regulation of development, heterochronic	13	-0.414539	-1.23694	0.193055	0.900337	0.892377
GO:0001889	liver development	125	0.276926	1.16468	0.193133	0.900337	0.892377
GO:0032653	regulation of interleukin-10 production	38	0.352446	1.21386	0.193386	0.900337	0.892377
GO:0003203	endocardial cushion morphogenesis	26	-0.327508	-1.1996	0.193591	0.900337	0.892377
GO:0060765	regulation of androgen receptor signaling pathway	25	0.391653	1.22959	0.193618	0.900337	0.892377
GO:0021903	rostrocaudal neural tube patterning	11	0.495386	1.2551	0.193653	0.900337	0.892377
GO:0017157	regulation of exocytosis	162	0.266026	1.1539	0.193831	0.900337	0.892377
GO:0061003	positive regulation of dendritic spine morphogenesis	17	0.43549	1.24264	0.194011	0.900337	0.892377
GO:0042447	hormone catabolic process	12	-0.426296	-1.2399	0.194028	0.900337	0.892377
GO:0060117	auditory receptor cell development	19	-0.362944	-1.21656	0.1943	0.900337	0.892377
GO:0033008	positive regulation of mast cell activation involved in immune response	12	0.482219	1.25221	0.194388	0.900337	0.892377
GO:0043306	positive regulation of mast cell degranulation	12	0.482219	1.25221	0.194388	0.900337	0.892377
GO:0006513	protein monoubiquitination	57	0.320762	1.1955	0.194866	0.901634	0.893663
GO:1903008	organelle disassembly	95	0.289818	1.17419	0.194977	0.901634	0.893663
GO:0016338	calcium-independent cell-cell adhesion via plasma membrane cell-adhesion molecules	16	-0.384196	-1.22321	0.196255	0.904877	0.896877
GO:0019692	deoxyribose phosphate metabolic process	30	0.372763	1.22017	0.196276	0.904877	0.896877
GO:0006744	ubiquinone biosynthetic process	14	0.459603	1.24567	0.1963	0.904877	0.896877
GO:1901663	quinone biosynthetic process	14	0.459603	1.24567	0.1963	0.904877	0.896877
GO:0042276	error-prone translesion synthesis	17	0.434474	1.23974	0.196573	0.905419	0.897414
GO:0090128	regulation of synapse maturation	10	0.508335	1.25308	0.197169	0.906507	0.898493
GO:1902743	regulation of lamellipodium organization	36	0.355701	1.21135	0.197372	0.906507	0.898493
GO:0030073	insulin secretion	183	0.260974	1.14666	0.197383	0.906507	0.898493
GO:0015721	bile acid and bile salt transport	25	-0.330577	-1.198	0.197432	0.906507	0.898493
GO:1903580	positive regulation of ATP metabolic process	28	0.378919	1.221	0.197637	0.90673	0.898714
GO:0019318	hexose metabolic process	206	0.256712	1.14131	0.198632	0.907036	0.899017
GO:0036230	granulocyte activation	421	0.237674	1.11337	0.198682	0.907036	0.899017
GO:0043518	negative regulation of DNA damage response, signal transduction by p53 class mediator	12	-0.424138	-1.23363	0.198725	0.907036	0.899017
GO:0051452	intracellular pH reduction	41	0.344579	1.20543	0.198878	0.907036	0.899017
GO:0030449	regulation of complement activation	32	0.365868	1.21494	0.198916	0.907036	0.899017
GO:0002052	positive regulation of neuroblast proliferation	16	0.441127	1.23874	0.198958	0.907036	0.899017
GO:0005996	monosaccharide metabolic process	232	0.252832	1.13628	0.198979	0.907036	0.899017
GO:0060632	regulation of microtubule-based movement	22	-0.344036	-1.20311	0.199152	0.907036	0.899017
GO:0045740	positive regulation of DNA replication	51	0.327574	1.19598	0.199196	0.907036	0.899017
GO:1990266	neutrophil migration	67	0.309058	1.18482	0.199413	0.907036	0.899017
GO:0090343	positive regulation of cell aging	14	0.458182	1.24182	0.199656	0.907036	0.899017
GO:0031110	regulation of microtubule polymerization or depolymerization	65	0.310909	1.18569	0.199872	0.907036	0.899017
GO:1903201	regulation of oxidative stress-induced cell death	58	0.318248	1.18986	0.20017	0.907036	0.899017
GO:0061900	glial cell activation	27	0.381522	1.21912	0.200274	0.907036	0.899017
GO:0002455	humoral immune response mediated by circulating immunoglobulin	33	0.362633	1.21229	0.200406	0.907036	0.899017
GO:0050435	amyloid-beta metabolic process	34	0.359905	1.21093	0.200488	0.907036	0.899017
GO:0043299	leukocyte degranulation	447	0.236262	1.11023	0.200598	0.907036	0.899017
GO:0001780	neutrophil homeostasis	12	0.479156	1.24426	0.20105	0.907036	0.899017
GO:0002717	positive regulation of natural killer cell mediated immunity	22	0.402505	1.22587	0.201614	0.907036	0.899017
GO:0032873	negative regulation of stress-activated MAPK cascade	39	0.347868	1.20451	0.201749	0.907036	0.899017
GO:0070303	negative regulation of stress-activated protein kinase signaling cascade	39	0.347868	1.20451	0.201749	0.907036	0.899017
GO:0072523	purine-containing compound catabolic process	48	-0.271422	-1.15785	0.202214	0.907036	0.899017
GO:1901652	response to peptide	440	0.236379	1.10988	0.202501	0.907036	0.899017
GO:0006368	transcription elongation from RNA polymerase II promoter	94	-0.229872	-1.12387	0.203131	0.907036	0.899017
GO:0007568	aging	255	0.249474	1.13015	0.203206	0.907036	0.899017
GO:0072538	T-helper 17 type immune response	19	0.418309	1.22868	0.203289	0.907036	0.899017
GO:0006903	vesicle targeting	82	0.296105	1.17317	0.20344	0.907036	0.899017
GO:0070306	lens fiber cell differentiation	26	-0.324477	-1.1885	0.203643	0.907036	0.899017
GO:0042113	B cell activation	190	0.258711	1.14101	0.203831	0.907036	0.899017
GO:0010324	membrane invagination	51	0.326353	1.19152	0.203905	0.907036	0.899017
GO:0099068	postsynapse assembly	16	0.439109	1.23307	0.203944	0.907036	0.899017
GO:0048599	oocyte development	33	-0.301912	-1.1762	0.203979	0.907036	0.899017
GO:1904659	glucose transmembrane transport	93	0.289064	1.16742	0.204225	0.907036	0.899017
GO:0018126	protein hydroxylation	19	0.417869	1.22739	0.204471	0.907036	0.899017
GO:0060976	coronary vasculature development	39	-0.28714	-1.16659	0.204624	0.907036	0.899017
GO:0050651	dermatan sulfate proteoglycan biosynthetic process	15	-0.389389	-1.21534	0.20466	0.907036	0.899017
GO:0060828	regulation of canonical Wnt signaling pathway	225	0.253007	1.1339	0.204811	0.907036	0.899017
GO:0032007	negative regulation of TOR signaling	37	0.35114	1.20283	0.204907	0.907036	0.899017
GO:2000257	regulation of protein activation cascade	33	0.361184	1.20745	0.20494	0.907036	0.899017
GO:0097178	ruffle assembly	35	0.356028	1.20518	0.204943	0.907036	0.899017
GO:0000491	small nucleolar ribonucleoprotein complex assembly	10	0.504647	1.24399	0.205038	0.907036	0.899017
GO:0034312	diol biosynthetic process	14	0.455899	1.23563	0.205066	0.907036	0.899017
GO:0010948	negative regulation of cell cycle process	290	0.245692	1.12422	0.205507	0.907036	0.899017
GO:0032616	interleukin-13 production	17	0.430714	1.22902	0.206026	0.907036	0.899017
GO:0070193	synaptonemal complex organization	15	0.446482	1.23253	0.206111	0.907036	0.899017
GO:0045954	positive regulation of natural killer cell mediated cytotoxicity	20	0.411352	1.22379	0.206404	0.907036	0.899017
GO:0061008	hepaticobiliary system development	128	0.273533	1.15378	0.206481	0.907036	0.899017
GO:0035082	axoneme assembly	52	0.324304	1.18827	0.20661	0.907036	0.899017
GO:0072583	clathrin-dependent endocytosis	36	0.35295	1.20198	0.206723	0.907036	0.899017
GO:0098542	defense response to other organism	354	0.240581	1.11582	0.207087	0.907036	0.899017
GO:0034767	positive regulation of ion transmembrane transport	124	0.274744	1.15433	0.207304	0.907036	0.899017
GO:0002861	regulation of inflammatory response to antigenic stimulus	19	0.416728	1.22404	0.207355	0.907036	0.899017
GO:0007595	lactation	38	0.34828	1.19951	0.207395	0.907036	0.899017
GO:0042451	purine nucleoside biosynthetic process	19	0.416584	1.22361	0.207763	0.907036	0.899017
GO:0046129	purine ribonucleoside biosynthetic process	19	0.416584	1.22361	0.207763	0.907036	0.899017
GO:0030902	hindbrain development	130	0.272588	1.15206	0.2078	0.907036	0.899017
GO:0002703	regulation of leukocyte mediated immunity	141	0.269218	1.14917	0.208093	0.907036	0.899017
GO:0070661	leukocyte proliferation	225	0.252524	1.13173	0.208362	0.907036	0.899017
GO:0009084	glutamine family amino acid biosynthetic process	16	0.437296	1.22798	0.208591	0.907036	0.899017
GO:0006779	porphyrin-containing compound biosynthetic process	20	0.410579	1.22149	0.208597	0.907036	0.899017
GO:0071801	regulation of podosome assembly	12	0.475655	1.23517	0.209194	0.907036	0.899017
GO:0050819	negative regulation of coagulation	39	0.345739	1.19714	0.209244	0.907036	0.899017
GO:0060986	endocrine hormone secretion	42	0.339641	1.19395	0.209276	0.907036	0.899017
GO:0097028	dendritic cell differentiation	36	0.352172	1.19933	0.209353	0.907036	0.899017
GO:0007173	epidermal growth factor receptor signaling pathway	118	0.276599	1.15465	0.209428	0.907036	0.899017
GO:0015936	coenzyme A metabolic process	15	-0.387482	-1.20939	0.209522	0.907036	0.899017
GO:0006409	tRNA export from nucleus	29	0.371645	1.20706	0.209808	0.907036	0.899017
GO:0071431	tRNA-containing ribonucleoprotein complex export from nucleus	29	0.371645	1.20706	0.209808	0.907036	0.899017
GO:0016075	rRNA catabolic process	17	-0.370952	-1.2033	0.209848	0.907036	0.899017
GO:1903320	regulation of protein modification by small protein conjugation or removal	178	0.260026	1.13916	0.210016	0.907036	0.899017
GO:0051031	tRNA transport	31	0.365272	1.20444	0.210267	0.907036	0.899017
GO:0002719	negative regulation of cytokine production involved in immune response	19	-0.357359	-1.19783	0.210358	0.907036	0.899017
GO:0045737	positive regulation of cyclin-dependent protein serine/threonine kinase activity	32	-0.303059	-1.17145	0.210375	0.907036	0.899017
GO:0072527	pyrimidine-containing compound metabolic process	70	0.303855	1.17321	0.210381	0.907036	0.899017
GO:0051896	regulation of protein kinase B signaling	172	-0.203034	-1.09221	0.210425	0.907036	0.899017
GO:1901184	regulation of ERBB signaling pathway	88	0.290709	1.16453	0.210736	0.907036	0.899017
GO:0002708	positive regulation of lymphocyte mediated immunity	66	0.307464	1.17553	0.210768	0.907036	0.899017
GO:0032309	icosanoid secretion	36	0.351639	1.19752	0.211283	0.907036	0.899017
GO:0061842	microtubule organizing center localization	23	-0.335328	-1.18732	0.211613	0.907036	0.899017
GO:0006020	inositol metabolic process	10	0.501585	1.23644	0.2117	0.907036	0.899017
GO:0006004	fucose metabolic process	15	-0.386556	-1.2065	0.211903	0.907036	0.899017
GO:0031396	regulation of protein ubiquitination	154	0.265045	1.14313	0.212128	0.907036	0.899017
GO:0099024	plasma membrane invagination	43	0.336922	1.19008	0.212224	0.907036	0.899017
GO:2000108	positive regulation of leukocyte apoptotic process	26	0.381391	1.20833	0.21229	0.907036	0.899017
GO:0006907	pinocytosis	18	-0.363046	-1.19781	0.212349	0.907036	0.899017
GO:0002312	B cell activation involved in immune response	59	0.314098	1.17794	0.212518	0.907036	0.899017
GO:0048639	positive regulation of developmental growth	152	0.26551	1.14337	0.212569	0.907036	0.899017
GO:0009167	purine ribonucleoside monophosphate metabolic process	270	0.246583	1.12219	0.213156	0.907036	0.899017
GO:0001946	lymphangiogenesis	14	0.452511	1.22645	0.213256	0.907036	0.899017
GO:0009116	nucleoside metabolic process	113	0.277757	1.15307	0.213331	0.907036	0.899017
GO:0007605	sensory perception of sound	127	-0.214409	-1.1031	0.213385	0.907036	0.899017
GO:0007076	mitotic chromosome condensation	16	0.435456	1.22282	0.213423	0.907036	0.899017
GO:1903524	positive regulation of blood circulation	61	-0.252803	-1.13681	0.213519	0.907036	0.899017
GO:0002446	neutrophil mediated immunity	417	0.236351	1.10663	0.213612	0.907036	0.899017
GO:1901798	positive regulation of signal transduction by p53 class mediator	17	0.427657	1.22029	0.214028	0.907036	0.899017
GO:0031145	anaphase-promoting complex-dependent catabolic process	67	0.305717	1.17202	0.214084	0.907036	0.899017
GO:0006354	DNA-templated transcription, elongation	117	-0.217851	-1.10648	0.214256	0.907036	0.899017
GO:0032787	monocarboxylic acid metabolic process	495	0.232942	1.10006	0.214451	0.907036	0.899017
GO:0060191	regulation of lipase activity	71	0.301938	1.16851	0.214876	0.907036	0.899017
GO:0050870	positive regulation of T cell activation	169	0.261182	1.138	0.214957	0.907036	0.899017
GO:0061418	regulation of transcription from RNA polymerase II promoter in response to hypoxia	70	-0.244187	-1.12951	0.215014	0.907036	0.899017
GO:0097061	dendritic spine organization	67	0.305492	1.17115	0.215134	0.907036	0.899017
GO:0046716	muscle cell cellular homeostasis	16	0.43477	1.22089	0.215214	0.907036	0.899017
GO:0010310	regulation of hydrogen peroxide metabolic process	12	0.472872	1.22794	0.215673	0.907036	0.899017
GO:0022400	regulation of rhodopsin mediated signaling pathway	19	0.413643	1.21497	0.215767	0.907036	0.899017
GO:0070098	chemokine-mediated signaling pathway	60	0.312257	1.17457	0.215772	0.907036	0.899017
GO:0072378	blood coagulation, fibrin clot formation	19	0.413631	1.21494	0.215804	0.907036	0.899017
GO:0060219	camera-type eye photoreceptor cell differentiation	15	0.442458	1.22142	0.215956	0.907036	0.899017
GO:0033047	regulation of mitotic sister chromatid segregation	59	0.313198	1.17456	0.216308	0.907036	0.899017
GO:0045061	thymic T cell selection	18	-0.361717	-1.19343	0.216487	0.907036	0.899017
GO:0043405	regulation of MAP kinase activity	306	0.242973	1.11608	0.216587	0.907036	0.899017
GO:1902993	positive regulation of amyloid precursor protein catabolic process	12	0.472421	1.22677	0.216755	0.907036	0.899017
GO:0009100	glycoprotein metabolic process	354	0.239521	1.11091	0.216898	0.907036	0.899017
GO:0035635	entry of bacterium into host cell	17	0.426381	1.21665	0.217278	0.907036	0.899017
GO:0001659	temperature homeostasis	33	0.357345	1.19461	0.217612	0.907036	0.899017
GO:0050709	negative regulation of protein secretion	99	0.283134	1.15397	0.218523	0.907036	0.899017
GO:0006297	nucleotide-excision repair, DNA gap filling	19	0.412608	1.21193	0.218579	0.907036	0.899017
GO:0030111	regulation of Wnt signaling pathway	296	0.243572	1.11613	0.218616	0.907036	0.899017
GO:1900027	regulation of ruffle assembly	25	0.383063	1.20262	0.218628	0.907036	0.899017
GO:0016051	carbohydrate biosynthetic process	195	0.255707	1.13069	0.218816	0.907036	0.899017
GO:0050850	positive regulation of calcium-mediated signaling	32	0.359707	1.19448	0.218979	0.907036	0.899017
GO:0021549	cerebellum development	86	0.290264	1.15854	0.219137	0.907036	0.899017
GO:0045639	positive regulation of myeloid cell differentiation	74	0.298519	1.16323	0.219538	0.907036	0.899017
GO:0031570	DNA integrity checkpoint	141	0.267233	1.14069	0.220039	0.907036	0.899017
GO:0002283	neutrophil activation involved in immune response	409	0.236107	1.10437	0.220046	0.907036	0.899017
GO:0019985	translesion synthesis	36	0.349165	1.18909	0.220125	0.907036	0.899017
GO:1903050	regulation of proteolysis involved in cellular protein catabolic process	187	0.25685	1.131	0.220307	0.907036	0.899017
GO:0007158	neuron cell-cell adhesion	15	0.440724	1.21663	0.220477	0.907036	0.899017
GO:0006446	regulation of translational initiation	68	-0.245228	-1.12739	0.220551	0.907036	0.899017
GO:0032303	regulation of icosanoid secretion	14	0.449522	1.21835	0.220563	0.907036	0.899017
GO:0003183	mitral valve morphogenesis	10	0.497454	1.22626	0.220961	0.907036	0.899017
GO:0021536	diencephalon development	65	0.305984	1.16691	0.221205	0.907036	0.899017
GO:0051968	positive regulation of synaptic transmission, glutamatergic	28	0.371078	1.19574	0.221719	0.907036	0.899017
GO:0072111	cell proliferation involved in kidney development	15	-0.382927	-1.19518	0.221737	0.907036	0.899017
GO:0120031	plasma membrane bounded cell projection assembly	483	0.232678	1.09755	0.221946	0.907036	0.899017
GO:0007214	gamma-aminobutyric acid signaling pathway	22	0.395211	1.20365	0.222239	0.907036	0.899017
GO:0032495	response to muramyl dipeptide	14	0.448816	1.21644	0.222416	0.907036	0.899017
GO:1902305	regulation of sodium ion transmembrane transport	54	0.317524	1.17173	0.222951	0.907036	0.899017
GO:0021681	cerebellar granular layer development	12	0.469634	1.21953	0.223382	0.907036	0.899017
GO:0006892	post-Golgi vesicle-mediated transport	85	0.290032	1.15563	0.223643	0.907036	0.899017
GO:0033143	regulation of intracellular steroid hormone receptor signaling pathway	67	0.303535	1.16365	0.223989	0.907036	0.899017
GO:0036336	dendritic cell migration	23	0.389877	1.2002	0.224066	0.907036	0.899017
GO:0031623	receptor internalization	82	-0.233951	-1.11593	0.224083	0.907036	0.899017
GO:0043312	neutrophil degranulation	406	0.235834	1.10261	0.224181	0.907036	0.899017
GO:1902287	semaphorin-plexin signaling pathway involved in axon guidance	12	-0.413071	-1.20144	0.224388	0.907036	0.899017
GO:0006336	DNA replication-independent nucleosome assembly	43	-0.275212	-1.14445	0.224643	0.907036	0.899017
GO:0034724	DNA replication-independent nucleosome organization	43	-0.275212	-1.14445	0.224643	0.907036	0.899017
GO:0014002	astrocyte development	29	0.367023	1.19205	0.224761	0.907036	0.899017
GO:0050912	detection of chemical stimulus involved in sensory perception of taste	30	0.363806	1.19085	0.225005	0.907036	0.899017
GO:0097756	negative regulation of blood vessel diameter	73	-0.240191	-1.12033	0.225318	0.907036	0.899017
GO:1901661	quinone metabolic process	27	0.373479	1.19342	0.225354	0.907036	0.899017
GO:0038066	p38MAPK cascade	32	0.357725	1.1879	0.22545	0.907036	0.899017
GO:0010226	response to lithium ion	21	-0.341085	-1.17709	0.225459	0.907036	0.899017
GO:0010569	regulation of double-strand break repair via homologous recombination	27	0.37337	1.19307	0.2257	0.907036	0.899017
GO:0016241	regulation of macroautophagy	149	0.264173	1.135	0.226089	0.907036	0.899017
GO:0043372	positive regulation of CD4-positive, alpha-beta T cell differentiation	22	0.393812	1.19939	0.226345	0.907036	0.899017
GO:0043243	positive regulation of protein complex disassembly	29	0.366515	1.1904	0.226368	0.907036	0.899017
GO:0031167	rRNA methylation	23	0.389109	1.19784	0.226429	0.907036	0.899017
GO:0060850	regulation of transcription involved in cell fate commitment	16	0.430452	1.20876	0.226488	0.907036	0.899017
GO:0051315	attachment of mitotic spindle microtubules to kinetochore	10	0.494863	1.21988	0.226817	0.907036	0.899017
GO:0036159	inner dynein arm assembly	16	0.430327	1.20841	0.226821	0.907036	0.899017
GO:0034643	establishment of mitochondrion localization, microtubule-mediated	20	0.404076	1.20214	0.226891	0.907036	0.899017
GO:0047497	mitochondrion transport along microtubule	20	0.404076	1.20214	0.226891	0.907036	0.899017
GO:0045621	positive regulation of lymphocyte differentiation	70	0.30023	1.15922	0.227054	0.907036	0.899017
GO:1903861	positive regulation of dendrite extension	16	0.430082	1.20772	0.227454	0.907036	0.899017
GO:0006805	xenobiotic metabolic process	93	0.284481	1.14891	0.228041	0.907036	0.899017
GO:0043116	negative regulation of vascular permeability	10	-0.439721	-1.20464	0.228135	0.907036	0.899017
GO:0070534	protein K63-linked ubiquitination	38	0.342439	1.17939	0.228431	0.907036	0.899017
GO:0045844	positive regulation of striated muscle tissue development	60	0.309365	1.16369	0.228561	0.907036	0.899017
GO:0048636	positive regulation of muscle organ development	60	0.309365	1.16369	0.228561	0.907036	0.899017
GO:0070584	mitochondrion morphogenesis	20	0.403506	1.20045	0.228628	0.907036	0.899017
GO:0003174	mitral valve development	11	0.479909	1.21589	0.22873	0.907036	0.899017
GO:0050817	coagulation	290	0.242914	1.1115	0.228746	0.907036	0.899017
GO:0033144	negative regulation of intracellular steroid hormone receptor signaling pathway	31	0.359613	1.18578	0.228912	0.907036	0.899017
GO:0002043	blood vessel endothelial cell proliferation involved in sprouting angiogenesis	15	-0.380223	-1.18674	0.229166	0.907036	0.899017
GO:0050930	induction of positive chemotaxis	13	0.456009	1.21093	0.229428	0.907036	0.899017
GO:0007599	hemostasis	291	0.242702	1.1108	0.229802	0.907036	0.899017
GO:0045851	pH reduction	42	0.334167	1.17471	0.229996	0.907036	0.899017
GO:0033006	regulation of mast cell activation involved in immune response	26	0.375614	1.19003	0.230198	0.907036	0.899017
GO:0043304	regulation of mast cell degranulation	26	0.375614	1.19003	0.230198	0.907036	0.899017
GO:0032881	regulation of polysaccharide metabolic process	31	0.359143	1.18423	0.230468	0.907036	0.899017
GO:0051044	positive regulation of membrane protein ectodomain proteolysis	12	-0.410532	-1.19406	0.230659	0.907036	0.899017
GO:0006040	amino sugar metabolic process	35	0.348515	1.17975	0.230977	0.907036	0.899017
GO:0002200	somatic diversification of immune receptors	59	0.309875	1.1621	0.231014	0.907036	0.899017
GO:0042119	neutrophil activation	416	0.234673	1.09863	0.231069	0.907036	0.899017
GO:0051962	positive regulation of nervous system development	443	0.233428	1.09639	0.231173	0.907036	0.899017
GO:0021872	forebrain generation of neurons	57	0.31205	1.16303	0.231219	0.907036	0.899017
GO:0035729	cellular response to hepatocyte growth factor stimulus	11	-0.423556	-1.19699	0.231545	0.907036	0.899017
GO:0032816	positive regulation of natural killer cell activation	14	0.445236	1.20673	0.231552	0.907036	0.899017
GO:0018027	peptidyl-lysine dimethylation	14	-0.388925	-1.18779	0.231754	0.907036	0.899017
GO:0002287	alpha-beta T cell activation involved in immune response	47	0.325254	1.16908	0.231884	0.907036	0.899017
GO:0002293	alpha-beta T cell differentiation involved in immune response	47	0.325254	1.16908	0.231884	0.907036	0.899017
GO:0060271	cilium assembly	322	0.24009	1.10667	0.231889	0.907036	0.899017
GO:0051259	protein complex oligomerization	464	0.232463	1.09446	0.232176	0.907036	0.899017
GO:0035304	regulation of protein dephosphorylation	110	0.27562	1.13996	0.232615	0.907036	0.899017
GO:0003215	cardiac right ventricle morphogenesis	17	-0.362923	-1.17725	0.23331	0.907036	0.899017
GO:1904064	positive regulation of cation transmembrane transport	112	0.274614	1.13864	0.233567	0.907036	0.899017
GO:0006690	icosanoid metabolic process	87	0.286886	1.1471	0.233722	0.907036	0.899017
GO:0003214	cardiac left ventricle morphogenesis	14	-0.388173	-1.18549	0.233776	0.907036	0.899017
GO:0016998	cell wall macromolecule catabolic process	10	-0.437113	-1.19749	0.233901	0.907036	0.899017
GO:1902107	positive regulation of leukocyte differentiation	111	0.274942	1.13862	0.233969	0.907036	0.899017
GO:1903901	negative regulation of viral life cycle	69	-0.242237	-1.11685	0.234021	0.907036	0.899017
GO:0002827	positive regulation of T-helper 1 type immune response	11	0.477599	1.21004	0.234144	0.907036	0.899017
GO:0044782	cilium organization	331	0.239175	1.10448	0.234231	0.907036	0.899017
GO:0098754	detoxification	101	0.279282	1.14137	0.234613	0.907036	0.899017
GO:0045165	cell fate commitment	220	0.249746	1.1169	0.23477	0.907036	0.899017
GO:0000280	nuclear division	336	0.238742	1.10362	0.234784	0.907036	0.899017
GO:0048814	regulation of dendrite morphogenesis	75	0.294633	1.15064	0.23484	0.907036	0.899017
GO:2001267	regulation of cysteine-type endopeptidase activity involved in apoptotic signaling pathway	19	0.406816	1.19492	0.234873	0.907036	0.899017
GO:0050796	regulation of insulin secretion	155	0.261326	1.12793	0.234944	0.907036	0.899017
GO:1901018	positive regulation of potassium ion transmembrane transporter activity	21	0.395715	1.19163	0.235111	0.907036	0.899017
GO:0051701	interaction with host	187	-0.197961	-1.07745	0.235537	0.907036	0.899017
GO:0021877	forebrain neuron fate commitment	10	0.490939	1.2102	0.23591	0.907036	0.899017
GO:0045732	positive regulation of protein catabolic process	189	0.254361	1.12125	0.235929	0.907036	0.899017
GO:0070106	interleukin-27-mediated signaling pathway	11	0.476817	1.20806	0.23603	0.907036	0.899017
GO:2000311	regulation of AMPA receptor activity	22	0.390513	1.18935	0.236176	0.907036	0.899017
GO:0042501	serine phosphorylation of STAT protein	14	0.443453	1.2019	0.236294	0.907036	0.899017
GO:0002363	alpha-beta T cell lineage commitment	17	0.41939	1.1967	0.236341	0.907036	0.899017
GO:0021532	neural tube patterning	37	0.342431	1.17299	0.236491	0.907036	0.899017
GO:0002294	CD4-positive, alpha-beta T cell differentiation involved in immune response	46	0.325634	1.16546	0.236545	0.907036	0.899017
GO:0030195	negative regulation of blood coagulation	36	0.344644	1.1737	0.236592	0.907036	0.899017
GO:1900047	negative regulation of hemostasis	36	0.344644	1.1737	0.236592	0.907036	0.899017
GO:0046660	female sex differentiation	101	0.278921	1.13989	0.236599	0.907036	0.899017
GO:0002253	activation of immune response	479	0.231461	1.09141	0.236785	0.907036	0.899017
GO:1901201	regulation of extracellular matrix assembly	14	0.443264	1.20139	0.236816	0.907036	0.899017
GO:0045822	negative regulation of heart contraction	18	0.412251	1.19397	0.237028	0.907036	0.899017
GO:0048525	negative regulation of viral process	83	-0.231575	-1.10708	0.237146	0.907036	0.899017
GO:0006879	cellular iron ion homeostasis	58	0.309548	1.15734	0.23728	0.907036	0.899017
GO:0002792	negative regulation of peptide secretion	105	0.276959	1.13815	0.237511	0.907036	0.899017
GO:0045683	negative regulation of epidermis development	12	0.463712	1.20416	0.23776	0.907036	0.899017
GO:0001501	skeletal system development	422	0.233737	1.09508	0.237794	0.907036	0.899017
GO:0042093	T-helper cell differentiation	45	0.326929	1.16516	0.237958	0.907036	0.899017
GO:0044264	cellular polysaccharide metabolic process	79	0.29113	1.14671	0.238032	0.907036	0.899017
GO:0001921	positive regulation of receptor recycling	13	0.452616	1.20192	0.238055	0.907036	0.899017
GO:0045778	positive regulation of ossification	72	0.296203	1.14914	0.238349	0.907036	0.899017
GO:0009126	purine nucleoside monophosphate metabolic process	271	0.243472	1.10836	0.238661	0.907036	0.899017
GO:0090316	positive regulation of intracellular protein transport	176	0.256284	1.12151	0.238806	0.907036	0.899017
GO:0006103	2-oxoglutarate metabolic process	17	0.41833	1.19368	0.239281	0.907036	0.899017
GO:0140115	export across plasma membrane	19	0.405288	1.19043	0.239362	0.907036	0.899017
GO:0071548	response to dexamethasone	40	0.335585	1.1681	0.239374	0.907036	0.899017
GO:0048266	behavioral response to pain	10	0.489382	1.20637	0.239594	0.907036	0.899017
GO:0045651	positive regulation of macrophage differentiation	12	-0.40682	-1.18326	0.239933	0.907036	0.899017
GO:2001222	regulation of neuron migration	32	-0.296041	-1.14433	0.240018	0.907036	0.899017
GO:0072089	stem cell proliferation	98	0.279688	1.13833	0.240202	0.907036	0.899017
GO:1901615	organic hydroxy compound metabolic process	409	0.234075	1.09487	0.240656	0.907036	0.899017
GO:0009163	nucleoside biosynthetic process	41	0.333264	1.16585	0.240855	0.907036	0.899017
GO:0051705	multi-organism behavior	58	0.308716	1.15423	0.241065	0.907036	0.899017
GO:0014857	regulation of skeletal muscle cell proliferation	13	-0.395024	-1.17871	0.241432	0.907036	0.899017
GO:0005977	glycogen metabolic process	59	0.307551	1.15339	0.241524	0.907036	0.899017
GO:0006073	cellular glucan metabolic process	59	0.307551	1.15339	0.241524	0.907036	0.899017
GO:0044042	glucan metabolic process	59	0.307551	1.15339	0.241524	0.907036	0.899017
GO:0051255	spindle midzone assembly	10	0.488515	1.20423	0.24156	0.907036	0.899017
GO:0016445	somatic diversification of immunoglobulins	50	0.318564	1.15865	0.241607	0.907036	0.899017
GO:0032365	intracellular lipid transport	26	0.372083	1.17884	0.241752	0.907036	0.899017
GO:0007618	mating	32	0.35314	1.17267	0.24176	0.907036	0.899017
GO:2000392	regulation of lamellipodium morphogenesis	11	0.474542	1.20229	0.241794	0.907036	0.899017
GO:0033044	regulation of chromosome organization	286	0.241687	1.10475	0.242314	0.907036	0.899017
GO:1903020	positive regulation of glycoprotein metabolic process	19	0.404287	1.18749	0.242381	0.907036	0.899017
GO:0042058	regulation of epidermal growth factor receptor signaling pathway	77	0.291724	1.14412	0.242426	0.907036	0.899017
GO:0043434	response to peptide hormone	384	0.235099	1.09576	0.242971	0.907036	0.899017
GO:0016125	sterol metabolic process	129	0.267111	1.12792	0.243099	0.907036	0.899017
GO:0060088	auditory receptor cell stereocilium organization	13	-0.394345	-1.17668	0.243248	0.907036	0.899017
GO:0006644	phospholipid metabolic process	402	0.234138	1.09408	0.24338	0.907036	0.899017
GO:0006734	NADH metabolic process	34	0.34738	1.16879	0.243734	0.907036	0.899017
GO:0043174	nucleoside salvage	14	0.440532	1.19398	0.243772	0.907036	0.899017
GO:0032480	negative regulation of type I interferon production	44	0.327179	1.16083	0.243968	0.907036	0.899017
GO:0034341	response to interferon-gamma	150	0.261196	1.12314	0.243976	0.907036	0.899017
GO:0046323	glucose import	66	0.300247	1.14793	0.243988	0.907036	0.899017
GO:2000774	positive regulation of cellular senescence	12	0.461217	1.19768	0.243992	0.907036	0.899017
GO:0007005	mitochondrion organization	498	0.23012	1.08703	0.244325	0.907036	0.899017
GO:0006826	iron ion transport	54	0.31263	1.15367	0.244344	0.907036	0.899017
GO:0051668	localization within membrane	106	0.275323	1.13294	0.244549	0.907036	0.899017
GO:0060561	apoptotic process involved in morphogenesis	24	0.37895	1.17834	0.244661	0.907036	0.899017
GO:0009124	nucleoside monophosphate biosynthetic process	165	0.257606	1.11961	0.245083	0.907036	0.899017
GO:0050769	positive regulation of neurogenesis	390	0.234537	1.09409	0.245108	0.907036	0.899017
GO:0003352	regulation of cilium movement	12	-0.404749	-1.17724	0.245235	0.907036	0.899017
GO:0002068	glandular epithelial cell development	22	0.387545	1.18031	0.245279	0.907036	0.899017
GO:0046128	purine ribonucleoside metabolic process	67	0.299036	1.14641	0.245283	0.907036	0.899017
GO:1903859	regulation of dendrite extension	19	0.403223	1.18437	0.245435	0.907036	0.899017
GO:0007193	adenylate cyclase-inhibiting G-protein coupled receptor signaling pathway	68	0.298062	1.14553	0.245544	0.907036	0.899017
GO:0018243	protein O-linked glycosylation via threonine	14	0.439853	1.19214	0.245581	0.907036	0.899017
GO:0007223	Wnt signaling pathway, calcium modulating pathway	35	0.34447	1.16606	0.245673	0.907036	0.899017
GO:0051589	negative regulation of neurotransmitter transport	18	0.409091	1.18482	0.246047	0.907036	0.899017
GO:0046888	negative regulation of hormone secretion	56	0.309926	1.1513	0.246049	0.907036	0.899017
GO:0032613	interleukin-10 production	40	0.333859	1.1621	0.246051	0.907036	0.899017
GO:0030301	cholesterol transport	69	0.297142	1.14476	0.246153	0.907036	0.899017
GO:0009152	purine ribonucleotide biosynthetic process	249	0.244757	1.10657	0.246552	0.907036	0.899017
GO:1901160	primary amino compound metabolic process	10	-0.43165	-1.18253	0.246675	0.907036	0.899017
GO:0010984	regulation of lipoprotein particle clearance	18	-0.351935	-1.16115	0.246701	0.907036	0.899017
GO:0007269	neurotransmitter secretion	128	0.266901	1.12581	0.246724	0.907036	0.899017
GO:0099643	signal release from synapse	128	0.266901	1.12581	0.246724	0.907036	0.899017
GO:2000010	positive regulation of protein localization to cell surface	11	-0.417258	-1.17919	0.246854	0.907036	0.899017
GO:0071364	cellular response to epidermal growth factor stimulus	38	0.337577	1.16265	0.247032	0.907036	0.899017
GO:0097286	iron ion import	14	0.439274	1.19058	0.247063	0.907036	0.899017
GO:0048149	behavioral response to ethanol	12	0.459954	1.1944	0.24707	0.907036	0.899017
GO:0051966	regulation of synaptic transmission, glutamatergic	64	0.301354	1.1461	0.247232	0.907036	0.899017
GO:1901863	positive regulation of muscle tissue development	61	0.30424	1.14767	0.247252	0.907036	0.899017
GO:0030488	tRNA methylation	31	-0.297243	-1.13959	0.247332	0.907036	0.899017
GO:0071380	cellular response to prostaglandin E stimulus	14	0.439142	1.19022	0.247378	0.907036	0.899017
GO:1900449	regulation of glutamate receptor signaling pathway	39	0.33547	1.16158	0.247415	0.907036	0.899017
GO:0042744	hydrogen peroxide catabolic process	21	0.391704	1.17955	0.247548	0.907036	0.899017
GO:0030032	lamellipodium assembly	52	0.314461	1.1522	0.247557	0.907036	0.899017
GO:0010464	regulation of mesenchymal cell proliferation	33	0.348804	1.16606	0.24759	0.907036	0.899017
GO:0070936	protein K48-linked ubiquitination	46	0.323012	1.15607	0.247737	0.907036	0.899017
GO:0090162	establishment of epithelial cell polarity	25	0.373881	1.17379	0.247889	0.907036	0.899017
GO:0034308	primary alcohol metabolic process	48	0.319853	1.15441	0.247943	0.907036	0.899017
GO:0010463	mesenchymal cell proliferation	42	0.329625	1.15875	0.248004	0.907036	0.899017
GO:0006122	mitochondrial electron transport, ubiquinol to cytochrome c	10	-0.431101	-1.18102	0.248017	0.907036	0.899017
GO:0046329	negative regulation of JNK cascade	31	0.354089	1.16757	0.248019	0.907036	0.899017
GO:0045333	cellular respiration	149	0.260825	1.12062	0.248119	0.907036	0.899017
GO:0070232	regulation of T cell apoptotic process	28	0.363015	1.16976	0.248341	0.907036	0.899017
GO:0006418	tRNA aminoacylation for protein translation	42	-0.272356	-1.12628	0.248467	0.907036	0.899017
GO:0072376	protein activation cascade	64	0.301052	1.14495	0.248667	0.907036	0.899017
GO:0046634	regulation of alpha-beta T cell activation	64	0.300987	1.14471	0.248947	0.907036	0.899017
GO:0050701	interleukin-1 secretion	43	0.327538	1.15693	0.249024	0.907036	0.899017
GO:0050482	arachidonic acid secretion	25	0.373495	1.17258	0.249217	0.907036	0.899017
GO:1903963	arachidonate transport	25	0.373495	1.17258	0.249217	0.907036	0.899017
GO:0016056	rhodopsin mediated signaling pathway	21	0.391158	1.17791	0.249225	0.907036	0.899017
GO:0006346	methylation-dependent chromatin silencing	18	0.407974	1.18158	0.249357	0.907036	0.899017
GO:0070665	positive regulation of leukocyte proliferation	114	0.27117	1.12701	0.249532	0.907036	0.899017
GO:0042053	regulation of dopamine metabolic process	15	0.429747	1.18633	0.249651	0.907036	0.899017
GO:0042069	regulation of catecholamine metabolic process	15	0.429747	1.18633	0.249651	0.907036	0.899017
GO:0003272	endocardial cushion formation	19	-0.34501	-1.15644	0.249859	0.907036	0.899017
GO:0046849	bone remodeling	70	0.295558	1.14118	0.249897	0.907036	0.899017
GO:0035176	social behavior	47	0.320869	1.15332	0.249961	0.907036	0.899017
GO:0051703	intraspecies interaction between organisms	47	0.320869	1.15332	0.249961	0.907036	0.899017
GO:0036503	ERAD pathway	83	-0.229899	-1.09907	0.24998	0.907036	0.899017
GO:0060253	negative regulation of glial cell proliferation	14	0.438146	1.18752	0.249982	0.907036	0.899017
GO:0072148	epithelial cell fate commitment	16	-0.365126	-1.1625	0.25001	0.907036	0.899017
GO:0045839	negative regulation of mitotic nuclear division	43	0.327304	1.1561	0.250027	0.907036	0.899017
GO:0009953	dorsal/ventral pattern formation	82	0.286889	1.13666	0.250081	0.907036	0.899017
GO:1990845	adaptive thermogenesis	14	0.438015	1.18716	0.250328	0.907036	0.899017
GO:0043534	blood vessel endothelial cell migration	101	-0.220331	-1.09134	0.250656	0.907036	0.899017
GO:0009156	ribonucleoside monophosphate biosynthetic process	155	0.259028	1.11801	0.250695	0.907036	0.899017
GO:0010811	positive regulation of cell-substrate adhesion	93	0.28036	1.13227	0.25078	0.907036	0.899017
GO:0021591	ventricular system development	22	0.385691	1.17466	0.251057	0.907036	0.899017
GO:0042770	signal transduction in response to DNA damage	122	0.268181	1.12444	0.251197	0.907036	0.899017
GO:0046390	ribose phosphate biosynthetic process	265	0.242573	1.10229	0.251536	0.907036	0.899017
GO:0032785	negative regulation of DNA-templated transcription, elongation	11	-0.415361	-1.17383	0.251661	0.907036	0.899017
GO:0030101	natural killer cell activation	54	0.310999	1.14765	0.251749	0.907036	0.899017
GO:0003323	type B pancreatic cell development	17	0.413834	1.18085	0.251937	0.907036	0.899017
GO:0010744	positive regulation of macrophage derived foam cell differentiation	14	0.437243	1.18507	0.252393	0.907036	0.899017
GO:0050879	multicellular organismal movement	41	-0.273446	-1.12408	0.25243	0.907036	0.899017
GO:0050881	musculoskeletal movement	41	-0.273446	-1.12408	0.25243	0.907036	0.899017
GO:0006271	DNA strand elongation involved in DNA replication	20	-0.338433	-1.15177	0.252454	0.907036	0.899017
GO:0098773	skin epidermis development	72	0.293361	1.13811	0.25269	0.907036	0.899017
GO:0051607	defense response to virus	182	0.253273	1.11217	0.252843	0.907036	0.899017
GO:0051851	modification by host of symbiont morphology or physiology	61	-0.246481	-1.10838	0.253104	0.907036	0.899017
GO:0071549	cellular response to dexamethasone stimulus	32	0.349951	1.16208	0.253148	0.907036	0.899017
GO:0002720	positive regulation of cytokine production involved in immune response	29	0.358607	1.16472	0.25323	0.907036	0.899017
GO:0034113	heterotypic cell-cell adhesion	37	0.337997	1.1578	0.253324	0.907036	0.899017
GO:1903429	regulation of cell maturation	16	0.420535	1.18091	0.25339	0.907036	0.899017
GO:0007051	spindle organization	144	0.261291	1.11812	0.253393	0.907036	0.899017
GO:0000154	rRNA modification	35	0.342288	1.15867	0.25385	0.907036	0.899017
GO:0008045	motor neuron axon guidance	21	-0.332679	-1.14808	0.254061	0.907036	0.899017
GO:1904293	negative regulation of ERAD pathway	13	-0.390434	-1.16501	0.254121	0.907036	0.899017
GO:0010742	macrophage derived foam cell differentiation	31	0.352367	1.16189	0.254158	0.907036	0.899017
GO:0090077	foam cell differentiation	31	0.352367	1.16189	0.254158	0.907036	0.899017
GO:2001233	regulation of apoptotic signaling pathway	336	0.236712	1.09424	0.254661	0.907036	0.899017
GO:0006044	N-acetylglucosamine metabolic process	16	0.419952	1.17928	0.254993	0.907036	0.899017
GO:0006646	phosphatidylethanolamine biosynthetic process	12	-0.40097	-1.16624	0.255183	0.907036	0.899017
GO:0015849	organic acid transport	263	0.24237	1.10069	0.255294	0.907036	0.899017
GO:0046942	carboxylic acid transport	263	0.24237	1.10069	0.255294	0.907036	0.899017
GO:0051653	spindle localization	35	0.341875	1.15728	0.255446	0.907036	0.899017
GO:0060317	cardiac epithelial to mesenchymal transition	29	-0.300761	-1.13356	0.255614	0.907036	0.899017
GO:0033523	histone H2B ubiquitination	11	0.468788	1.18772	0.25562	0.907036	0.899017
GO:0010389	regulation of G2/M transition of mitotic cell cycle	168	0.255517	1.11267	0.255725	0.907036	0.899017
GO:1903725	regulation of phospholipid metabolic process	63	0.300458	1.13983	0.256182	0.907036	0.899017
GO:2001259	positive regulation of cation channel activity	51	0.313827	1.14579	0.256308	0.907036	0.899017
GO:0030216	keratinocyte differentiation	198	0.250126	1.10773	0.25686	0.907036	0.899017
GO:0007143	female meiotic nuclear division	19	-0.342966	-1.14959	0.256971	0.907036	0.899017
GO:0030901	midbrain development	84	0.284341	1.13086	0.25708	0.907036	0.899017
GO:0051298	centrosome duplication	57	0.306319	1.14167	0.257145	0.907036	0.899017
GO:1901379	regulation of potassium ion transmembrane transport	65	0.298328	1.13771	0.257318	0.907036	0.899017
GO:0009896	positive regulation of catabolic process	351	0.235528	1.0918	0.257405	0.907036	0.899017
GO:0042307	positive regulation of protein import into nucleus	30	0.354341	1.15987	0.257512	0.907036	0.899017
GO:0010453	regulation of cell fate commitment	27	0.363819	1.16255	0.257549	0.907036	0.899017
GO:0070166	enamel mineralization	10	0.481745	1.18754	0.25792	0.907036	0.899017
GO:2001241	positive regulation of extrinsic apoptotic signaling pathway in absence of ligand	11	0.467875	1.1854	0.257932	0.907036	0.899017
GO:0031532	actin cytoskeleton reorganization	96	0.2776	1.12632	0.257959	0.907036	0.899017
GO:0045730	respiratory burst	22	0.383516	1.16804	0.257977	0.907036	0.899017
GO:0031663	lipopolysaccharide-mediated signaling pathway	45	0.322069	1.14784	0.258234	0.907036	0.899017
GO:0042088	T-helper 1 type immune response	34	0.34347	1.15563	0.258366	0.907036	0.899017
GO:0043270	positive regulation of ion transport	216	0.247277	1.1041	0.258415	0.907036	0.899017
GO:0018208	peptidyl-proline modification	42	0.327035	1.14964	0.258608	0.907036	0.899017
GO:0043471	regulation of cellular carbohydrate catabolic process	10	0.481461	1.18684	0.258617	0.907036	0.899017
GO:0042246	tissue regeneration	53	-0.254301	-1.10952	0.258689	0.907036	0.899017
GO:0030520	intracellular estrogen receptor signaling pathway	50	0.314601	1.14423	0.258788	0.907036	0.899017
GO:0009161	ribonucleoside monophosphate metabolic process	282	0.240204	1.0968	0.259247	0.907036	0.899017
GO:1902224	ketone body metabolic process	10	0.481136	1.18604	0.259438	0.907036	0.899017
GO:0021533	cell differentiation in hindbrain	18	0.404526	1.1716	0.259488	0.907036	0.899017
GO:0021884	forebrain neuron development	25	0.370425	1.16295	0.259491	0.907036	0.899017
GO:0015748	organophosphate ester transport	79	0.287078	1.13075	0.259586	0.907036	0.899017
GO:0048732	gland development	369	0.234272	1.08929	0.259626	0.907036	0.899017
GO:0045214	sarcomere organization	40	-0.273881	-1.11933	0.25977	0.907036	0.899017
GO:0032729	positive regulation of interferon-gamma production	52	0.3117	1.14209	0.259794	0.907036	0.899017
GO:0032692	negative regulation of interleukin-1 production	21	0.387659	1.16737	0.260217	0.907036	0.899017
GO:0032310	prostaglandin secretion	12	0.454953	1.18141	0.260225	0.907036	0.899017
GO:0034374	low-density lipoprotein particle remodeling	10	0.480701	1.18496	0.260484	0.907036	0.899017
GO:2001275	positive regulation of glucose import in response to insulin stimulus	16	-0.361761	-1.15178	0.260502	0.907036	0.899017
GO:0007031	peroxisome organization	30	0.353471	1.15702	0.26059	0.907036	0.899017
GO:0001678	cellular glucose homeostasis	119	0.267678	1.11861	0.260675	0.907036	0.899017
GO:0051310	metaphase plate congression	51	0.312745	1.14184	0.261034	0.907036	0.899017
GO:0032663	regulation of interleukin-2 production	40	-0.273606	-1.1182	0.261273	0.907036	0.899017
GO:0051341	regulation of oxidoreductase activity	73	0.290958	1.13127	0.261285	0.907036	0.899017
GO:0043923	positive regulation by host of viral transcription	17	-0.353986	-1.14827	0.261439	0.907036	0.899017
GO:0015749	monosaccharide transmembrane transport	100	0.274975	1.12225	0.262226	0.907036	0.899017
GO:0007602	phototransduction	41	0.327951	1.14727	0.26237	0.907036	0.899017
GO:0043254	regulation of protein complex assembly	381	0.233353	1.08712	0.262427	0.907036	0.899017
GO:0000819	sister chromatid segregation	210	0.247635	1.10285	0.26249	0.907036	0.899017
GO:0001675	acrosome assembly	10	-0.424931	-1.16412	0.262581	0.907036	0.899017
GO:0036149	phosphatidylinositol acyl-chain remodeling	13	0.443031	1.17647	0.262836	0.907036	0.899017
GO:0006958	complement activation, classical pathway	24	0.373336	1.16088	0.262862	0.907036	0.899017
GO:0070242	thymocyte apoptotic process	15	0.424939	1.17305	0.263032	0.907036	0.899017
GO:1901881	positive regulation of protein depolymerization	16	0.416999	1.17099	0.263501	0.907036	0.899017
GO:0001975	response to amphetamine	24	0.373131	1.16024	0.263578	0.907036	0.899017
GO:0032693	negative regulation of interleukin-10 production	14	0.432952	1.17344	0.263911	0.907036	0.899017
GO:0008645	hexose transmembrane transport	99	0.275142	1.1214	0.263965	0.907036	0.899017
GO:0060968	regulation of gene silencing	117	0.267843	1.11688	0.264015	0.907036	0.899017
GO:0061614	pri-miRNA transcription by RNA polymerase II	36	0.337429	1.14913	0.264058	0.907036	0.899017
GO:0099531	presynaptic process involved in chemical synaptic transmission	137	0.26156	1.11255	0.264827	0.907036	0.899017
GO:0044282	small molecule catabolic process	366	0.233882	1.08695	0.265181	0.907036	0.899017
GO:0002431	Fc receptor mediated stimulatory signaling pathway	77	0.287331	1.12689	0.265208	0.907036	0.899017
GO:0010596	negative regulation of endothelial cell migration	49	-0.258392	-1.10766	0.265445	0.907036	0.899017
GO:0033683	nucleotide-excision repair, DNA incision	30	0.352051	1.15237	0.265844	0.907036	0.899017
GO:0009584	detection of visible light	41	0.327036	1.14407	0.266144	0.907036	0.899017
GO:0051495	positive regulation of cytoskeleton organization	189	0.250387	1.10374	0.266197	0.907036	0.899017
GO:0015682	ferric iron transport	35	0.339069	1.14778	0.26628	0.907036	0.899017
GO:0072512	trivalent inorganic cation transport	35	0.339069	1.14778	0.26628	0.907036	0.899017
GO:0031664	regulation of lipopolysaccharide-mediated signaling pathway	19	0.396172	1.16366	0.266808	0.907036	0.899017
GO:0006457	protein folding	217	0.246134	1.09942	0.266864	0.907036	0.899017
GO:0045669	positive regulation of osteoblast differentiation	52	0.310098	1.13621	0.267025	0.907036	0.899017
GO:0032148	activation of protein kinase B activity	29	-0.298145	-1.12371	0.267239	0.907036	0.899017
GO:0031650	regulation of heat generation	10	0.477846	1.17793	0.267415	0.907036	0.899017
GO:0086014	atrial cardiac muscle cell action potential	19	0.395941	1.16298	0.267496	0.907036	0.899017
GO:0086026	atrial cardiac muscle cell to AV node cell signaling	19	0.395941	1.16298	0.267496	0.907036	0.899017
GO:0086066	atrial cardiac muscle cell to AV node cell communication	19	0.395941	1.16298	0.267496	0.907036	0.899017
GO:0050680	negative regulation of epithelial cell proliferation	112	-0.21405	-1.07909	0.267539	0.907036	0.899017
GO:0008535	respiratory chain complex IV assembly	18	0.401761	1.16359	0.267905	0.907036	0.899017
GO:0072348	sulfur compound transport	29	0.354272	1.15064	0.268737	0.907036	0.899017
GO:0019216	regulation of lipid metabolic process	317	0.236521	1.08908	0.268839	0.907036	0.899017
GO:0051817	modification of morphology or physiology of other organism involved in symbiotic interaction	95	-0.221238	-1.08371	0.269065	0.907036	0.899017
GO:0032355	response to estradiol	112	0.2688	1.11454	0.269071	0.907036	0.899017
GO:0007606	sensory perception of chemical stimulus	287	0.238707	1.0914	0.269076	0.907036	0.899017
GO:0071850	mitotic cell cycle arrest	14	0.431093	1.1684	0.269088	0.907036	0.899017
GO:0071466	cellular response to xenobiotic stimulus	145	0.258776	1.10829	0.269133	0.907036	0.899017
GO:0070198	protein localization to chromosome, telomeric region	25	0.367558	1.15394	0.269205	0.907036	0.899017
GO:0048384	retinoic acid receptor signaling pathway	29	0.354123	1.15015	0.269311	0.907036	0.899017
GO:2000679	positive regulation of transcription regulatory region DNA binding	19	0.395129	1.16059	0.269984	0.907036	0.899017
GO:0097150	neuronal stem cell population maintenance	21	0.384543	1.15799	0.27011	0.907036	0.899017
GO:0040037	negative regulation of fibroblast growth factor receptor signaling pathway	11	-0.408186	-1.15355	0.270257	0.907036	0.899017
GO:0045444	fat cell differentiation	180	0.251325	1.10244	0.270382	0.907036	0.899017
GO:0060252	positive regulation of glial cell proliferation	11	0.462953	1.17293	0.270537	0.907036	0.899017
GO:0071715	icosanoid transport	39	0.329594	1.14124	0.270897	0.907036	0.899017
GO:1901571	fatty acid derivative transport	39	0.329594	1.14124	0.270897	0.907036	0.899017
GO:0030072	peptide hormone secretion	220	0.245288	1.09696	0.271087	0.907036	0.899017
GO:0046134	pyrimidine nucleoside biosynthetic process	25	0.36698	1.15213	0.271157	0.907036	0.899017
GO:0003094	glomerular filtration	17	0.407211	1.16195	0.271192	0.907036	0.899017
GO:2000779	regulation of double-strand break repair	53	0.308012	1.13267	0.271198	0.907036	0.899017
GO:0030595	leukocyte chemotaxis	151	0.25703	1.106	0.271207	0.907036	0.899017
GO:0086003	cardiac muscle cell contraction	55	0.305568	1.13141	0.271296	0.907036	0.899017
GO:0005978	glycogen biosynthetic process	40	0.327488	1.13992	0.2717	0.907036	0.899017
GO:0009250	glucan biosynthetic process	40	0.327488	1.13992	0.2717	0.907036	0.899017
GO:0014033	neural crest cell differentiation	73	0.288972	1.12354	0.271864	0.907036	0.899017
GO:0006164	purine nucleotide biosynthetic process	252	0.241561	1.09327	0.27199	0.907036	0.899017
GO:0035988	chondrocyte proliferation	15	0.421798	1.16439	0.272114	0.907036	0.899017
GO:0046488	phosphatidylinositol metabolic process	191	0.249269	1.09997	0.272223	0.907036	0.899017
GO:0048286	lung alveolus development	32	-0.289008	-1.11714	0.272297	0.907036	0.899017
GO:2000772	regulation of cellular senescence	36	0.33533	1.14198	0.272323	0.907036	0.899017
GO:0062013	positive regulation of small molecule metabolic process	145	0.258317	1.10632	0.272402	0.907036	0.899017
GO:1900115	extracellular regulation of signal transduction	15	-0.365785	-1.14167	0.272404	0.907036	0.899017
GO:1900116	extracellular negative regulation of signal transduction	15	-0.365785	-1.14167	0.272404	0.907036	0.899017
GO:0071599	otic vesicle development	13	-0.383936	-1.14563	0.272445	0.907036	0.899017
GO:0090276	regulation of peptide hormone secretion	183	0.250488	1.10059	0.272775	0.907036	0.899017
GO:0072337	modified amino acid transport	18	0.400146	1.15891	0.272812	0.907036	0.899017
GO:0000028	ribosomal small subunit assembly	16	-0.357939	-1.13962	0.272929	0.907036	0.899017
GO:0031952	regulation of protein autophosphorylation	38	-0.275154	-1.11077	0.273201	0.907036	0.899017
GO:0000188	inactivation of MAPK activity	23	-0.31859	-1.12805	0.273274	0.907036	0.899017
GO:0070169	positive regulation of biomineral tissue development	31	0.347239	1.14498	0.273301	0.907036	0.899017
GO:0050670	regulation of lymphocyte proliferation	172	0.252345	1.10166	0.273578	0.907036	0.899017
GO:0010875	positive regulation of cholesterol efflux	13	0.438887	1.16546	0.273828	0.907036	0.899017
GO:1903955	positive regulation of protein targeting to mitochondrion	78	0.285092	1.1205	0.273835	0.907036	0.899017
GO:0002694	regulation of leukocyte activation	404	0.231177	1.08056	0.273996	0.907036	0.899017
GO:0070167	regulation of biomineral tissue development	62	0.297706	1.12625	0.274019	0.907036	0.899017
GO:0002377	immunoglobulin production	82	0.282572	1.11956	0.274159	0.907036	0.899017
GO:0033198	response to ATP	23	0.374007	1.15135	0.274202	0.907036	0.899017
GO:0032736	positive regulation of interleukin-13 production	11	0.46142	1.16905	0.274503	0.907036	0.899017
GO:0021854	hypothalamus development	18	0.399577	1.15726	0.274565	0.907036	0.899017
GO:0032799	low-density lipoprotein receptor particle metabolic process	21	-0.327129	-1.12893	0.274873	0.907036	0.899017
GO:0006625	protein targeting to peroxisome	16	0.413016	1.1598	0.275207	0.907036	0.899017
GO:0072662	protein localization to peroxisome	16	0.413016	1.1598	0.275207	0.907036	0.899017
GO:0072663	establishment of protein localization to peroxisome	16	0.413016	1.1598	0.275207	0.907036	0.899017
GO:0060560	developmental growth involved in morphogenesis	204	0.246888	1.09658	0.275299	0.907036	0.899017
GO:0098900	regulation of action potential	46	0.316571	1.13302	0.275384	0.907036	0.899017
GO:0006531	aspartate metabolic process	10	0.474601	1.16993	0.275617	0.907036	0.899017
GO:0070233	negative regulation of T cell apoptotic process	16	0.412848	1.15933	0.275674	0.907036	0.899017
GO:0046486	glycerolipid metabolic process	383	0.231999	1.08113	0.275794	0.907036	0.899017
GO:1903825	organic acid transmembrane transport	97	-0.21945	-1.07919	0.275886	0.907036	0.899017
GO:1905039	carboxylic acid transmembrane transport	97	-0.21945	-1.07919	0.275886	0.907036	0.899017
GO:0006979	response to oxidative stress	371	0.232614	1.08199	0.275905	0.907036	0.899017
GO:0008306	associative learning	62	0.297239	1.12448	0.276297	0.907036	0.899017
GO:1903672	positive regulation of sprouting angiogenesis	33	0.341209	1.14067	0.276446	0.907036	0.899017
GO:0061098	positive regulation of protein tyrosine kinase activity	38	0.330208	1.13727	0.276569	0.907036	0.899017
GO:0042476	odontogenesis	102	0.271746	1.11217	0.276577	0.907036	0.899017
GO:0015988	energy coupled proton transmembrane transport, against electrochemical gradient	26	0.361841	1.1464	0.276943	0.907036	0.899017
GO:0015991	ATP hydrolysis coupled proton transport	26	0.361841	1.1464	0.276943	0.907036	0.899017
GO:0016024	CDP-diacylglycerol biosynthetic process	12	0.448362	1.1643	0.277279	0.907036	0.899017
GO:0043038	amino acid activation	46	-0.260612	-1.10134	0.277347	0.907036	0.899017
GO:0051293	establishment of spindle localization	31	0.346181	1.14149	0.277358	0.907036	0.899017
GO:0018242	protein O-linked glycosylation via serine	15	0.41987	1.15906	0.277656	0.907036	0.899017
GO:0090218	positive regulation of lipid kinase activity	29	0.351784	1.14256	0.27787	0.907036	0.899017
GO:1905048	regulation of metallopeptidase activity	16	0.41207	1.15714	0.27795	0.907036	0.899017
GO:0090382	phagosome maturation	36	0.333863	1.13698	0.278138	0.907036	0.899017
GO:0019184	nonribosomal peptide biosynthetic process	15	0.419583	1.15827	0.278534	0.907036	0.899017
GO:0048207	vesicle targeting, rough ER to cis-Golgi	59	0.299742	1.1241	0.278571	0.907036	0.899017
GO:0048208	COPII vesicle coating	59	0.299742	1.1241	0.278571	0.907036	0.899017
GO:0017156	calcium ion regulated exocytosis	103	0.270991	1.11056	0.27865	0.907036	0.899017
GO:0010592	positive regulation of lamellipodium assembly	13	0.436991	1.16043	0.278826	0.907036	0.899017
GO:0043491	protein kinase B signaling	204	-0.192091	-1.05727	0.278849	0.907036	0.899017
GO:0045185	maintenance of protein location	98	-0.218774	-1.07759	0.278993	0.907036	0.899017
GO:0010720	positive regulation of cell development	443	0.229127	1.07619	0.27902	0.907036	0.899017
GO:1900744	regulation of p38MAPK cascade	26	0.361223	1.14444	0.279191	0.907036	0.899017
GO:1903307	positive regulation of regulated secretory pathway	44	0.318906	1.13147	0.279401	0.907036	0.899017
GO:0010770	positive regulation of cell morphogenesis involved in differentiation	128	0.261978	1.10504	0.279424	0.907036	0.899017
GO:0071027	nuclear RNA surveillance	12	-0.392151	-1.14059	0.279651	0.907036	0.899017
GO:0071028	nuclear mRNA surveillance	12	-0.392151	-1.14059	0.279651	0.907036	0.899017
GO:0046718	viral entry into host cell	104	-0.215883	-1.07482	0.280108	0.907284	0.899262
GO:0045076	regulation of interleukin-2 biosynthetic process	13	-0.381181	-1.13741	0.28031	0.907284	0.899262
GO:0070734	histone H3-K27 methylation	18	-0.341935	-1.12816	0.280314	0.907284	0.899262
GO:1902667	regulation of axon guidance	35	0.335504	1.13571	0.28049	0.907284	0.899262
GO:0019217	regulation of fatty acid metabolic process	73	0.287309	1.11708	0.280718	0.907284	0.899262
GO:0046034	ATP metabolic process	228	0.243159	1.09112	0.280734	0.907284	0.899262
GO:0031069	hair follicle morphogenesis	23	0.372043	1.1453	0.280837	0.907284	0.899262
GO:0090036	regulation of protein kinase C signaling	10	0.472424	1.16456	0.280974	0.907284	0.899262
GO:1903305	regulation of regulated secretory pathway	107	0.268797	1.10756	0.2819	0.909331	0.901292
GO:0050655	dermatan sulfate proteoglycan metabolic process	16	-0.355102	-1.13058	0.281921	0.909331	0.901292
GO:0060670	branching involved in labyrinthine layer morphogenesis	11	-0.403785	-1.14111	0.282169	0.90934	0.9013
GO:0006261	DNA-dependent DNA replication	130	0.26091	1.10271	0.282474	0.90934	0.9013
GO:0001706	endoderm formation	51	0.308075	1.12479	0.282594	0.90934	0.9013
GO:1904591	positive regulation of protein import	33	0.339627	1.13538	0.282646	0.90934	0.9013
GO:0098813	nuclear chromosome segregation	263	0.239296	1.08673	0.283097	0.90934	0.9013
GO:0042632	cholesterol homeostasis	57	0.300935	1.12161	0.283109	0.90934	0.9013
GO:0055092	sterol homeostasis	57	0.300935	1.12161	0.283109	0.90934	0.9013
GO:1903727	positive regulation of phospholipid metabolic process	39	0.32665	1.13104	0.283173	0.90934	0.9013
GO:0106027	neuron projection organization	70	0.28902	1.11593	0.283464	0.909557	0.901516
GO:0006901	vesicle coating	63	0.294944	1.11891	0.283553	0.909557	0.901516
GO:0032642	regulation of chemokine production	61	0.296718	1.1193	0.283803	0.909856	0.901812
GO:2000177	regulation of neural precursor cell proliferation	68	0.290503	1.11648	0.284206	0.910648	0.902597
GO:0042745	circadian sleep/wake cycle	25	0.363151	1.14011	0.284692	0.910714	0.902663
GO:0055076	transition metal ion homeostasis	123	0.262684	1.10253	0.284876	0.910714	0.902663
GO:1901889	negative regulation of cell junction assembly	19	-0.335024	-1.12297	0.285052	0.910714	0.902663
GO:0033135	regulation of peptidyl-serine phosphorylation	108	0.267861	1.10512	0.285109	0.910714	0.902663
GO:1902903	regulation of supramolecular fiber organization	292	0.236645	1.08335	0.285151	0.910714	0.902663
GO:0019369	arachidonic acid metabolic process	42	0.32082	1.12779	0.285234	0.910714	0.902663
GO:1903649	regulation of cytoplasmic transport	16	0.409338	1.14947	0.286181	0.910714	0.902663
GO:0031023	microtubule organizing center organization	110	0.266954	1.10412	0.286235	0.910714	0.902663
GO:0021954	central nervous system neuron development	63	0.29442	1.11692	0.286312	0.910714	0.902663
GO:0043409	negative regulation of MAPK cascade	150	0.255167	1.09722	0.286561	0.910714	0.902663
GO:0090195	chemokine secretion	13	0.434168	1.15293	0.286633	0.910714	0.902663
GO:0035518	histone H2A monoubiquitination	15	0.416757	1.15047	0.286673	0.910714	0.902663
GO:2000105	positive regulation of DNA-dependent DNA replication	13	0.434086	1.15271	0.286857	0.910714	0.902663
GO:2000380	regulation of mesoderm development	15	-0.361313	-1.12771	0.287132	0.910714	0.902663
GO:0048711	positive regulation of astrocyte differentiation	13	0.433863	1.15212	0.287436	0.910714	0.902663
GO:0032944	regulation of mononuclear cell proliferation	173	0.250359	1.09364	0.287777	0.910714	0.902663
GO:0060251	regulation of glial cell proliferation	25	0.362298	1.13743	0.287814	0.910714	0.902663
GO:0014075	response to amine	36	0.331475	1.12885	0.287975	0.910714	0.902663
GO:0072350	tricarboxylic acid metabolic process	34	0.33588	1.13009	0.288158	0.910714	0.902663
GO:0031349	positive regulation of defense response	367	0.23167	1.07683	0.288178	0.910714	0.902663
GO:0051590	positive regulation of neurotransmitter transport	25	0.362194	1.1371	0.288187	0.910714	0.902663
GO:0016575	histone deacetylation	79	0.281879	1.11028	0.288343	0.910714	0.902663
GO:0046475	glycerophospholipid catabolic process	16	0.40858	1.14734	0.28838	0.910714	0.902663
GO:0050865	regulation of cell activation	434	0.228655	1.07284	0.288642	0.910714	0.902663
GO:0045580	regulation of T cell differentiation	106	0.268117	1.10329	0.288778	0.910714	0.902663
GO:0051881	regulation of mitochondrial membrane potential	59	0.297646	1.11624	0.288929	0.910714	0.902663
GO:0032204	regulation of telomere maintenance	73	0.28579	1.11117	0.288991	0.910714	0.902663
GO:0006488	dolichol-linked oligosaccharide biosynthetic process	19	0.389024	1.14266	0.289109	0.910714	0.902663
GO:0006490	oligosaccharide-lipid intermediate biosynthetic process	19	0.389024	1.14266	0.289109	0.910714	0.902663
GO:0051591	response to cAMP	89	0.275905	1.1071	0.289328	0.910714	0.902663
GO:0007130	synaptonemal complex assembly	13	0.432853	1.14944	0.290194	0.910714	0.902663
GO:0045947	negative regulation of translational initiation	17	-0.345351	-1.12026	0.290407	0.910714	0.902663
GO:0019693	ribose phosphate metabolic process	476	0.22696	1.06988	0.290513	0.910714	0.902663
GO:0001906	cell killing	108	0.266994	1.10154	0.290925	0.910714	0.902663
GO:0050702	interleukin-1 beta secretion	37	0.328586	1.12557	0.291216	0.910714	0.902663
GO:0032535	regulation of cellular component size	317	0.234282	1.07876	0.291285	0.910714	0.902663
GO:0033617	mitochondrial respiratory chain complex IV assembly	14	0.423246	1.14713	0.291475	0.910714	0.902663
GO:0051546	keratinocyte migration	10	0.468248	1.15427	0.291603	0.910714	0.902663
GO:0030866	cortical actin cytoskeleton organization	35	0.332753	1.12639	0.291665	0.910714	0.902663
GO:0044346	fibroblast apoptotic process	15	0.415056	1.14577	0.291674	0.910714	0.902663
GO:0036152	phosphatidylethanolamine acyl-chain remodeling	23	0.368904	1.13564	0.291761	0.910714	0.902663
GO:2001244	positive regulation of intrinsic apoptotic signaling pathway	51	0.306116	1.11764	0.291857	0.910714	0.902663
GO:0006991	response to sterol depletion	10	-0.413474	-1.13273	0.291975	0.910714	0.902663
GO:0097064	ncRNA export from nucleus	33	0.337275	1.12752	0.291997	0.910714	0.902663
GO:0060349	bone morphogenesis	75	0.283815	1.1084	0.292061	0.910714	0.902663
GO:0010869	regulation of receptor biosynthetic process	18	0.393837	1.14064	0.292313	0.910714	0.902663
GO:0032526	response to retinoic acid	91	0.274328	1.10441	0.292383	0.910714	0.902663
GO:0090278	negative regulation of peptide hormone secretion	39	0.324449	1.12342	0.292476	0.910714	0.902663
GO:0070932	histone H3 deacetylation	18	0.393762	1.14042	0.292541	0.910714	0.902663
GO:0046339	diacylglycerol metabolic process	15	0.414737	1.14489	0.292635	0.910714	0.902663
GO:0001702	gastrulation with mouth forming second	23	0.368619	1.13476	0.292671	0.910714	0.902663
GO:0060041	retina development in camera-type eye	123	0.261539	1.09773	0.292727	0.910714	0.902663
GO:0035930	corticosteroid hormone secretion	13	0.431897	1.1469	0.292904	0.910714	0.902663
GO:2000846	regulation of corticosteroid hormone secretion	13	0.431897	1.1469	0.292904	0.910714	0.902663
GO:0046467	membrane lipid biosynthetic process	120	0.262504	1.0982	0.293017	0.910714	0.902663
GO:0048791	calcium ion-regulated exocytosis of neurotransmitter	30	0.344824	1.12871	0.29306	0.910714	0.902663
GO:0002285	lymphocyte activation involved in immune response	129	0.259699	1.09662	0.293143	0.910714	0.902663
GO:0009394	2'-deoxyribonucleotide metabolic process	28	0.350526	1.12951	0.293601	0.910867	0.902814
GO:0072522	purine-containing compound biosynthetic process	261	0.238363	1.08182	0.293636	0.910867	0.902814
GO:0006338	chromatin remodeling	160	0.252106	1.09197	0.293757	0.910867	0.902814
GO:0003151	outflow tract morphogenesis	67	0.289535	1.10998	0.293818	0.910867	0.902814
GO:0002696	positive regulation of leukocyte activation	250	0.23937	1.08261	0.294157	0.911003	0.902948
GO:2000144	positive regulation of DNA-templated transcription, initiation	28	-0.295661	-1.10415	0.294187	0.911003	0.902948
GO:0007530	sex determination	20	-0.327145	-1.11336	0.294331	0.911003	0.902948
GO:0048538	thymus development	39	0.3239	1.12152	0.294913	0.911301	0.903244
GO:0000245	spliceosomal complex assembly	55	-0.246482	-1.08394	0.294974	0.911301	0.903244
GO:0000920	cell separation after cytokinesis	16	0.406322	1.141	0.295011	0.911301	0.903244
GO:0050807	regulation of synapse organization	147	0.254752	1.09283	0.295054	0.911301	0.903244
GO:0048588	developmental cell growth	186	0.247188	1.08786	0.295498	0.912189	0.904124
GO:0006890	retrograde vesicle-mediated transport, Golgi to ER	75	0.283141	1.10576	0.295963	0.912415	0.904348
GO:2001054	negative regulation of mesenchymal cell apoptotic process	10	0.466495	1.14995	0.296076	0.912415	0.904348
GO:0061387	regulation of extent of cell growth	95	0.271751	1.101	0.296094	0.912415	0.904348
GO:0140014	mitotic nuclear division	232	0.241015	1.08317	0.296198	0.912415	0.904348
GO:0042278	purine nucleoside metabolic process	70	0.286594	1.10657	0.296821	0.913529	0.905452
GO:0051569	regulation of histone H3-K4 methylation	23	0.367423	1.13108	0.296899	0.913529	0.905452
GO:0003254	regulation of membrane depolarization	37	0.327193	1.1208	0.297215	0.913529	0.905452
GO:1901998	toxin transport	35	0.331406	1.12184	0.297332	0.913529	0.905452
GO:0007098	centrosome cycle	101	0.268875	1.09884	0.297436	0.913529	0.905452
GO:0032968	positive regulation of transcription elongation from RNA polymerase II promoter	12	-0.386087	-1.12296	0.297563	0.913529	0.905452
GO:0030217	T cell differentiation	188	0.24659	1.08638	0.297779	0.913529	0.905452
GO:1903362	regulation of cellular protein catabolic process	213	0.243023	1.08372	0.29799	0.913529	0.905452
GO:0036003	positive regulation of transcription from RNA polymerase II promoter in response to stress	26	0.355985	1.12784	0.298174	0.913529	0.905452
GO:0044070	regulation of anion transport	76	0.282027	1.10378	0.298219	0.913529	0.905452
GO:0042073	intraciliary transport	44	0.314665	1.11642	0.298286	0.913529	0.905452
GO:0010876	lipid localization	310	0.23402	1.07588	0.298692	0.9136	0.905523
GO:0001578	microtubule bundle formation	76	0.281903	1.1033	0.29896	0.9136	0.905523
GO:0015697	quaternary ammonium group transport	12	-0.385609	-1.12156	0.299029	0.9136	0.905523
GO:0140112	extracellular vesicle biogenesis	20	0.380728	1.13268	0.299099	0.9136	0.905523
GO:1901976	regulation of cell cycle checkpoint	29	0.346089	1.12406	0.299464	0.9136	0.905523
GO:1902176	negative regulation of oxidative stress-induced intrinsic apoptotic signaling pathway	17	0.397891	1.13536	0.299549	0.9136	0.905523
GO:1902115	regulation of organelle assembly	143	0.255061	1.09062	0.299699	0.9136	0.905523
GO:0030511	positive regulation of transforming growth factor beta receptor signaling pathway	25	-0.304275	-1.10268	0.299841	0.9136	0.905523
GO:1903846	positive regulation of cellular response to transforming growth factor beta stimulus	25	-0.304275	-1.10268	0.299841	0.9136	0.905523
GO:0051145	smooth muscle cell differentiation	49	-0.252977	-1.08445	0.299923	0.9136	0.905523
GO:0032760	positive regulation of tumor necrosis factor production	56	0.298578	1.10914	0.300341	0.9136	0.905523
GO:0035821	modification of morphology or physiology of other organism	128	-0.205613	-1.05919	0.300637	0.9136	0.905523
GO:0033059	cellular pigmentation	49	-0.252826	-1.0838	0.300824	0.9136	0.905523
GO:0002224	toll-like receptor signaling pathway	109	0.265115	1.09513	0.300848	0.9136	0.905523
GO:0071674	mononuclear cell migration	53	0.301841	1.10998	0.300851	0.9136	0.905523
GO:2000116	regulation of cysteine-type endopeptidase activity	216	0.242288	1.08183	0.301042	0.9136	0.905523
GO:0006925	inflammatory cell apoptotic process	19	0.385372	1.13193	0.30108	0.9136	0.905523
GO:0016601	Rac protein signal transduction	36	0.328266	1.11792	0.301378	0.9136	0.905523
GO:0031000	response to caffeine	18	-0.336144	-1.10905	0.301447	0.9136	0.905523
GO:0036270	response to diuretic	18	-0.336144	-1.10905	0.301447	0.9136	0.905523
GO:0021794	thalamus development	13	0.42885	1.13881	0.30162	0.913648	0.90557
GO:1901653	cellular response to peptide	317	0.233229	1.07392	0.30216	0.914807	0.906719
GO:1904031	positive regulation of cyclin-dependent protein kinase activity	36	-0.273737	-1.09053	0.302359	0.914936	0.906847
GO:0007218	neuropeptide signaling pathway	84	0.276344	1.09905	0.302937	0.915105	0.907014
GO:0042104	positive regulation of activated T cell proliferation	18	0.390422	1.13075	0.30313	0.915105	0.907014
GO:0032986	protein-DNA complex disassembly	19	0.384717	1.13001	0.303196	0.915105	0.907014
GO:0022407	regulation of cell-cell adhesion	313	0.233357	1.07358	0.303322	0.915105	0.907014
GO:0003229	ventricular cardiac muscle tissue development	53	-0.247496	-1.07983	0.303535	0.915105	0.907014
GO:1903531	negative regulation of secretion by cell	153	0.252214	1.08696	0.303757	0.915105	0.907014
GO:0043153	entrainment of circadian clock by photoperiod	19	0.384517	1.12942	0.303912	0.915105	0.907014
GO:0050927	positive regulation of positive chemotaxis	22	0.369646	1.12579	0.304359	0.915105	0.907014
GO:0032026	response to magnesium ion	16	0.403246	1.13236	0.304462	0.915105	0.907014
GO:0032892	positive regulation of organic acid transport	27	0.350898	1.12127	0.304633	0.915105	0.907014
GO:0019042	viral latency	11	0.449945	1.13998	0.304699	0.915105	0.907014
GO:0030282	bone mineralization	86	0.274971	1.0975	0.304798	0.915105	0.907014
GO:0016064	immunoglobulin mediated immune response	86	0.274959	1.09745	0.304873	0.915105	0.907014
GO:0019724	B cell mediated immunity	86	0.274959	1.09745	0.304873	0.915105	0.907014
GO:0033692	cellular polysaccharide biosynthetic process	58	0.295469	1.1047	0.304979	0.915105	0.907014
GO:0031214	biomineral tissue development	109	0.264461	1.09243	0.305065	0.915105	0.907014
GO:0030031	cell projection assembly	496	0.225171	1.06346	0.305087	0.915105	0.907014
GO:0051150	regulation of smooth muscle cell differentiation	27	-0.296404	-1.09652	0.305442	0.915265	0.907173
GO:0002830	positive regulation of type 2 immune response	12	-0.383498	-1.11543	0.305455	0.915265	0.907173
GO:0071675	regulation of mononuclear cell migration	29	0.344495	1.11888	0.305768	0.915731	0.907634
GO:0008089	anterograde axonal transport	35	-0.275229	-1.08867	0.306232	0.916405	0.908303
GO:0002438	acute inflammatory response to antigenic stimulus	18	0.389321	1.12756	0.306766	0.916405	0.908303
GO:0001776	leukocyte homeostasis	74	0.281949	1.09867	0.30679	0.916405	0.908303
GO:0055008	cardiac muscle tissue morphogenesis	58	-0.241838	-1.07569	0.306924	0.916405	0.908303
GO:0007586	digestion	104	0.266152	1.09227	0.306989	0.916405	0.908303
GO:0046631	alpha-beta T cell activation	97	0.269128	1.09361	0.307006	0.916405	0.908303
GO:0045765	regulation of angiogenesis	250	0.237982	1.07633	0.307176	0.916405	0.908303
GO:0030218	erythrocyte differentiation	101	0.267354	1.09262	0.307252	0.916405	0.908303
GO:0042157	lipoprotein metabolic process	166	0.249148	1.08354	0.307556	0.916841	0.908735
GO:0048025	negative regulation of mRNA splicing, via spliceosome	18	-0.33438	-1.10323	0.308102	0.917137	0.909028
GO:0010717	regulation of epithelial to mesenchymal transition	78	0.279022	1.09664	0.308377	0.917137	0.909028
GO:0035195	gene silencing by miRNA	137	0.255365	1.0862	0.308846	0.917137	0.909028
GO:0000187	activation of MAPK activity	133	0.256368	1.08658	0.308973	0.917137	0.909028
GO:1901185	negative regulation of ERBB signaling pathway	50	0.303768	1.10483	0.309001	0.917137	0.909028
GO:0006450	regulation of translational fidelity	16	-0.347179	-1.10536	0.309158	0.917137	0.909028
GO:0006825	copper ion transport	18	0.38853	1.12527	0.309275	0.917137	0.909028
GO:0050901	leukocyte tethering or rolling	18	-0.333994	-1.10196	0.30972	0.917137	0.909028
GO:0048661	positive regulation of smooth muscle cell proliferation	69	-0.232041	-1.06985	0.310137	0.917137	0.909028
GO:0008033	tRNA processing	114	0.261886	1.08843	0.31027	0.917137	0.909028
GO:0010800	positive regulation of peptidyl-threonine phosphorylation	25	0.356043	1.11779	0.31048	0.917137	0.909028
GO:0045776	negative regulation of blood pressure	39	0.320319	1.10912	0.310518	0.917137	0.909028
GO:0021537	telencephalon development	219	-0.188203	-1.0452	0.310728	0.917137	0.909028
GO:0060443	mammary gland morphogenesis	41	0.316785	1.1082	0.310812	0.917137	0.909028
GO:0099132	ATP hydrolysis coupled cation transmembrane transport	51	0.302093	1.10295	0.311183	0.917137	0.909028
GO:0043248	proteasome assembly	13	0.425535	1.13001	0.311209	0.917137	0.909028
GO:0033014	tetrapyrrole biosynthetic process	23	0.363454	1.11886	0.31128	0.917137	0.909028
GO:0045619	regulation of lymphocyte differentiation	131	0.256615	1.08559	0.311286	0.917137	0.909028
GO:0000041	transition metal ion transport	98	0.267908	1.09038	0.311622	0.917137	0.909028
GO:0044036	cell wall macromolecule metabolic process	11	-0.393203	-1.11121	0.311663	0.917137	0.909028
GO:0071554	cell wall organization or biogenesis	11	-0.393203	-1.11121	0.311663	0.917137	0.909028
GO:0016556	mRNA modification	18	0.387775	1.12308	0.311706	0.917137	0.909028
GO:0030865	cortical cytoskeleton organization	45	0.310096	1.10517	0.311844	0.917137	0.909028
GO:0050691	regulation of defense response to virus by host	33	0.332377	1.11114	0.312122	0.917137	0.909028
GO:0050867	positive regulation of cell activation	259	0.23663	1.0733	0.312328	0.917137	0.909028
GO:0035067	negative regulation of histone acetylation	17	-0.339294	-1.10061	0.312362	0.917137	0.909028
GO:0010457	centriole-centriole cohesion	11	0.447104	1.13278	0.312388	0.917137	0.909028
GO:1901096	regulation of autophagosome maturation	10	0.460003	1.13394	0.312648	0.917137	0.909028
GO:0099116	tRNA 5'-end processing	14	0.415987	1.12746	0.312811	0.917137	0.909028
GO:0016482	cytosolic transport	123	0.258669	1.08568	0.3129	0.917137	0.909028
GO:1903533	regulation of protein targeting	116	0.260794	1.08632	0.312961	0.917137	0.909028
GO:1903052	positive regulation of proteolysis involved in cellular protein catabolic process	110	0.262948	1.08755	0.313105	0.917137	0.909028
GO:0070935	3'-UTR-mediated mRNA stabilization	13	-0.370715	-1.10617	0.313236	0.917137	0.909028
GO:0032482	Rab protein signal transduction	63	0.289214	1.09717	0.313487	0.917137	0.909028
GO:0070229	negative regulation of lymphocyte apoptotic process	26	0.351802	1.11459	0.313607	0.917137	0.909028
GO:0006576	cellular biogenic amine metabolic process	47	0.306801	1.10275	0.313716	0.917137	0.909028
GO:0034310	primary alcohol catabolic process	10	0.459455	1.13259	0.314152	0.917137	0.909028
GO:0090662	ATP hydrolysis coupled transmembrane transport	27	0.348401	1.11329	0.314327	0.917137	0.909028
GO:0099131	ATP hydrolysis coupled ion transmembrane transport	27	0.348401	1.11329	0.314327	0.917137	0.909028
GO:0046037	GMP metabolic process	21	0.371253	1.11796	0.31456	0.917137	0.909028
GO:1902004	positive regulation of amyloid-beta formation	10	0.4592	1.13196	0.314813	0.917137	0.909028
GO:0060711	labyrinthine layer development	41	-0.262569	-1.07936	0.314952	0.917137	0.909028
GO:0007628	adult walking behavior	24	0.358417	1.11449	0.315322	0.917137	0.909028
GO:0001942	hair follicle development	70	0.283274	1.09375	0.31534	0.917137	0.909028
GO:0030801	positive regulation of cyclic nucleotide metabolic process	47	-0.253316	-1.07556	0.315422	0.917137	0.909028
GO:0071709	membrane assembly	26	0.351292	1.11297	0.315568	0.917137	0.909028
[truncated: 3,823 more rows]

## Sheet: grouped - regression
ID	Description	setSize	enrichmentScore	NES	pvalue	p.adjust	qvalues
GO:0002830	positive regulation of type 2 immune response	12	-0.759296	-2.22187	0.000128158	0.241123	0.239994
GO:1902600	proton transmembrane transport	120	0.446698	1.71494	0.000138847	0.241123	0.239994
GO:0046835	carbohydrate phosphorylation	22	0.680131	1.97427	0.0001594	0.241123	0.239994
GO:0015988	energy coupled proton transmembrane transport, against electrochemical gradient	26	0.647623	1.94995	0.000207079	0.241123	0.239994
GO:0015991	ATP hydrolysis coupled proton transport	26	0.647623	1.94995	0.000207079	0.241123	0.239994
GO:0072604	interleukin-6 secretion	28	-0.546803	-2.07423	0.000333026	0.29331	0.291937
GO:0046325	negative regulation of glucose import	10	-0.771894	-2.12342	0.000352657	0.29331	0.291937
GO:0090278	negative regulation of peptide hormone secretion	39	0.556316	1.81636	0.000759466	0.398402	0.396536
GO:0090662	ATP hydrolysis coupled transmembrane transport	27	0.611017	1.85466	0.000781859	0.398402	0.396536
GO:0099131	ATP hydrolysis coupled ion transmembrane transport	27	0.611017	1.85466	0.000781859	0.398402	0.396536
GO:0001921	positive regulation of receptor recycling	13	0.736011	1.88039	0.00079819	0.398402	0.396536
GO:0036503	ERAD pathway	83	-0.348775	-1.69973	0.000836866	0.398402	0.396536
GO:2000774	positive regulation of cellular senescence	12	0.747419	1.8702	0.000889595	0.398402	0.396536
GO:0000041	transition metal ion transport	98	0.436367	1.63851	0.00127469	0.51267	0.510269
GO:0009123	nucleoside monophosphate metabolic process	296	0.350152	1.4343	0.00144315	0.51267	0.510269
GO:0044262	cellular carbohydrate metabolic process	224	0.367193	1.48243	0.00154886	0.51267	0.510269
GO:0072606	interleukin-8 secretion	27	-0.512186	-1.92255	0.00156069	0.51267	0.510269
GO:0030433	ubiquitin-dependent ERAD pathway	63	-0.367998	-1.69792	0.00158503	0.51267	0.510269
GO:0055067	monovalent inorganic cation homeostasis	139	0.400549	1.5598	0.00177812	0.540751	0.538218
GO:0090343	positive regulation of cell aging	14	0.697994	1.81795	0.00199108	0.540751	0.538218
GO:0046856	phosphatidylinositol dephosphorylation	24	0.606358	1.79445	0.00205218	0.540751	0.538218
GO:0009167	purine ribonucleoside monophosphate metabolic process	270	0.351666	1.43432	0.00205462	0.540751	0.538218
GO:0006826	iron ion transport	54	0.491869	1.69944	0.0021513	0.540751	0.538218
GO:0036109	alpha-linolenic acid metabolic process	12	0.722257	1.80724	0.00222913	0.540751	0.538218
GO:0032637	interleukin-8 production	62	-0.363588	-1.67202	0.00233831	0.544546	0.541996
GO:0009161	ribonucleoside monophosphate metabolic process	282	0.34636	1.41564	0.00264102	0.570023	0.567353
GO:0009126	purine nucleoside monophosphate metabolic process	271	0.348739	1.42266	0.00266505	0.570023	0.567353
GO:0060964	regulation of gene silencing by miRNA	92	0.429503	1.60054	0.00276334	0.570023	0.567353
GO:0002720	positive regulation of cytokine production involved in immune response	29	-0.48157	-1.84384	0.00291468	0.570023	0.567353
GO:0050982	detection of mechanical stimulus	36	0.537473	1.72865	0.00293725	0.570023	0.567353
GO:2000778	positive regulation of interleukin-6 secretion	19	-0.563886	-1.91058	0.00304067	0.571058	0.568384
GO:0045103	intermediate filament-based process	37	0.529093	1.71067	0.00352863	0.582239	0.579512
GO:0045104	intermediate filament cytoskeleton organization	37	0.529093	1.71067	0.00352863	0.582239	0.579512
GO:0015672	monovalent inorganic cation transport	440	0.321166	1.33474	0.00355	0.582239	0.579512
GO:0046839	phospholipid dephosphorylation	36	0.532039	1.71118	0.00359697	0.582239	0.579512
GO:0046676	negative regulation of insulin secretion	34	0.537073	1.70803	0.00393396	0.582239	0.579512
GO:0060147	regulation of posttranscriptional gene silencing	96	0.417885	1.56523	0.00423827	0.582239	0.579512
GO:0060966	regulation of gene silencing by RNA	96	0.417885	1.56523	0.00423827	0.582239	0.579512
GO:2000678	negative regulation of transcription regulatory region DNA binding	19	0.621257	1.74345	0.0044775	0.582239	0.579512
GO:0033572	transferrin transport	32	0.54211	1.70394	0.00450123	0.582239	0.579512
GO:0099132	ATP hydrolysis coupled cation transmembrane transport	51	0.480583	1.64507	0.00477307	0.582239	0.579512
GO:0015682	ferric iron transport	35	0.52791	1.68855	0.00485569	0.582239	0.579512
GO:0072512	trivalent inorganic cation transport	35	0.52791	1.68855	0.00485569	0.582239	0.579512
GO:0002251	organ or tissue specific immune response	25	-0.489919	-1.79957	0.0049473	0.582239	0.579512
GO:0097050	type B pancreatic cell apoptotic process	11	0.711794	1.74031	0.00501311	0.582239	0.579512
GO:0046034	ATP metabolic process	228	0.350999	1.41853	0.00505425	0.582239	0.579512
GO:0046888	negative regulation of hormone secretion	56	0.468201	1.62704	0.00511993	0.582239	0.579512
GO:2000674	regulation of type B pancreatic cell apoptotic process	10	0.727129	1.73209	0.00522063	0.582239	0.579512
GO:0002420	natural killer cell mediated cytotoxicity directed against tumor cell target	11	0.709958	1.73582	0.00527954	0.582239	0.579512
GO:0002423	natural killer cell mediated immune response to tumor cell	11	0.709958	1.73582	0.00527954	0.582239	0.579512
GO:0002855	regulation of natural killer cell mediated immune response to tumor cell	11	0.709958	1.73582	0.00527954	0.582239	0.579512
GO:0002858	regulation of natural killer cell mediated cytotoxicity directed against tumor cell target	11	0.709958	1.73582	0.00527954	0.582239	0.579512
GO:0002385	mucosal immune response	23	-0.504002	-1.80822	0.00531174	0.582239	0.579512
GO:0051493	regulation of cytoskeleton organization	437	0.31709	1.31752	0.00547303	0.582239	0.579512
GO:0071428	rRNA-containing ribonucleoprotein complex export from nucleus	15	-0.593331	-1.86748	0.00558422	0.582239	0.579512
GO:0070266	necroptotic process	26	0.566502	1.7057	0.00560037	0.582239	0.579512
GO:0042462	eye photoreceptor cell development	25	-0.484373	-1.7792	0.0058213	0.587989	0.585236
GO:0032677	regulation of interleukin-8 production	55	-0.359678	-1.6118	0.00585767	0.587989	0.585236
GO:0034105	positive regulation of tissue remodeling	26	0.562488	1.69361	0.00639439	0.625552	0.622623
GO:0002718	regulation of cytokine production involved in immune response	53	-0.361425	-1.60656	0.00644677	0.625552	0.622623
GO:0051186	cofactor metabolic process	489	0.310694	1.29498	0.00656804	0.626871	0.623935
GO:0006986	response to unfolded protein	161	-0.250244	-1.35885	0.00775177	0.676508	0.67334
GO:0045724	positive regulation of cilium assembly	19	-0.527261	-1.78649	0.00794135	0.676508	0.67334
GO:0007096	regulation of exit from mitosis	17	0.620312	1.69539	0.00810397	0.676508	0.67334
GO:0060576	intestinal epithelial cell development	11	-0.645151	-1.83367	0.00827937	0.676508	0.67334
GO:0036035	osteoclast development	15	0.639344	1.69444	0.00830811	0.676508	0.67334
GO:0042533	tumor necrosis factor biosynthetic process	16	-0.562194	-1.80549	0.00834234	0.676508	0.67334
GO:0042534	regulation of tumor necrosis factor biosynthetic process	16	-0.562194	-1.80549	0.00834234	0.676508	0.67334
GO:0070098	chemokine-mediated signaling pathway	60	-0.338578	-1.54633	0.00839351	0.676508	0.67334
GO:0048149	behavioral response to ethanol	12	0.67774	1.69585	0.00840042	0.676508	0.67334
GO:0072583	clathrin-dependent endocytosis	36	0.508084	1.63413	0.00851841	0.676508	0.67334
GO:1901799	negative regulation of proteasomal protein catabolic process	45	-0.37541	-1.60756	0.00861117	0.676508	0.67334
GO:0019693	ribose phosphate metabolic process	476	0.308819	1.28625	0.00866399	0.676508	0.67334
GO:0072521	purine-containing compound metabolic process	490	0.307741	1.28275	0.00868469	0.676508	0.67334
GO:0050927	positive regulation of positive chemotaxis	22	-0.494124	-1.74988	0.00890932	0.676508	0.67334
GO:0071604	transforming growth factor beta production	26	-0.462903	-1.7195	0.0089316	0.676508	0.67334
GO:0044827	modulation by host of viral genome replication	13	0.661017	1.6888	0.00894729	0.676508	0.67334
[truncated: 5,745 more rows]

## Sheet: grouped - sva
ID	Description	setSize	enrichmentScore	NES	pvalue	p.adjust	qvalues
[truncated: 5,822 more rows]
